# Supplementary material for: Aquaporin-7 Regulates the Response to Cellular Stress in Breast Cancer
Source: Oxford University Press journal article supplement (doi:10.1158/0008-5472.can-19-2269), 2020-07-06
Supplement: 00085472can192269-sup-226053_3_supp_6368762_qc54kj.xlsx [file 00085472can192269-sup-226053_3_supp_6368762_qc54kj.xlsx]

## Sheet: Legends
Table S1 List of hubs & raw data for network analysis, Related to Figure 1
This table lists the identities of hubs identified in network analysis in different tabs.
There are 3 networks constructed:
Gene-Met		hubs include gene hubs and metabolite hubs
Gene-Gene		hubs are only genes
Met-Met		hubs are only metabolites
Common hubs lists common hubs, including:
Common gene hubs		From Gene-Met and Gene-Gene network
Common metabolite hubs		From Gene-Met and Met-Met network
Raw data for construction of all networks is included as well
Only p<0.05 data is shown

## Sheet: Gene-Met Hubs
Gene Hubs						Metabolite Hubs	Super pathway	Sub pathway
AFFYMETRIX_3PRIME_IVT_ID	Gene Name	Related Genes	Species			1-oleoylglycerophosphoserine	Lipid	Lysolipid
1415812_at	gelsolin	RG	Mus musculus			2-oleoylglycerophosphocholine*	Lipid	Lysolipid
1415894_at	ectonucleotide pyrophosphatase/phosphodiesterase 2	RG	Mus musculus			N-glycolylneuraminate	Xenobiotics	Food Component/Plant
1415994_at	cytochrome P450, family 2, subfamily e, polypeptide 1	RG	Mus musculus			inositol 1-phosphate (I1P)	Lipid	Inositol Metabolism
1416318_at	serine (or cysteine) peptidase inhibitor, clade B, member 1a	RG	Mus musculus			1-hexadecanol	Lipid	Fatty Alcohol, Long Chain
1416432_at	6-phosphofructo-2-kinase/fructose-2,6-biphosphatase 3	RG	Mus musculus			1-palmitoylglycerol (1-monopalmitin)	Lipid	Monoacylglycerol
1416527_at	RAB32, member RAS oncogene family	RG	Mus musculus			beta-sitosterol	Lipid	Sterol
1416564_at	SRY-box containing gene 7	RG	Mus musculus			2-oleoylglycerophosphoethanolamine*	Lipid	Lysolipid
1416623_at	thrombospondin 3	RG	Mus musculus			2-palmitoylglycerophosphoethanolamine*	Lipid	Lysolipid
1416629_at	solute carrier family 1 (neutral amino acid transporter), member 5	RG	Mus musculus			cytidine 5'-monophosphate (5'-CMP)	Nucleotide	Pyrimidine Metabolism, Cytidine containing
1416630_at	inhibitor of DNA binding 3	RG	Mus musculus			pelargonate (9:0)	Lipid	Medium Chain Fatty Acid
1416639_at	solute carrier family 2 (facilitated glucose transporter), member 5	RG	Mus musculus			campesterol	Lipid	Sterol
1416676_at	kininogen 1	RG	Mus musculus			equol sulfate	Xenobiotics	Food Component/Plant
1416933_at	P450 (cytochrome) oxidoreductase	RG	Mus musculus			adrenate (22:4n6)	Lipid	Polyunsaturated Fatty Acid (n3 and n6)
1416992_at	MFNG O-fucosylpeptide 3-beta-N-acetylglucosaminyltransferase (Mfng)	RG	Mus musculus			adenosine 5'diphosphoribose	Cofactors and Vitamins	Nicotinate and Nicotinamide Metabolism
1417009_at	complement component 1, r subcomponent; predicted gene 8551	RG	Mus musculus			2-linoleoylglycerol (2-monolinolein)	Lipid	Monoacylglycerol
1417023_a_at	fatty acid binding protein 4, adipocyte	RG	Mus musculus			2-oleoylglycerophosphoserine*	Lipid	Lysolipid
1417133_at	peripheral myelin protein 22	RG	Mus musculus			alpha-tocopherol	Cofactors and Vitamins	Tocopherol Metabolism
1417318_at	deleted in bladder cancer 1 (human)	RG	Mus musculus			ornithine	Amino Acid	Urea cycle; Arginine and Proline Metabolism
1417323_at	proline/serine-rich coiled-coil 1	RG	Mus musculus			1-oleoylglycerol (1-monoolein)	Lipid	Monoacylglycerol
1417346_at	PYD and CARD domain containing	RG	Mus musculus			arabitol	Carbohydrate	Pentose Metabolism
1417347_at	PYD and CARD domain containing	RG	Mus musculus			1-palmitoylglycerophosphoethanolamine	Lipid	Lysolipid
1417358_s_at	sorbin and SH3 domain containing 1	RG	Mus musculus			cholestanol	Lipid	Sterol
1417403_at	predicted gene 11295; ELOVL family member 6, elongation of long chain fatty acids (yeast)	RG	Mus musculus			1-docosahexaenoylglycerophosphocholine (22:6n3)*	Lipid	Lysolipid
1417404_at	predicted gene 11295; ELOVL family member 6, elongation of long chain fatty acids (yeast)	RG	Mus musculus			phenylacetylglycine	Amino Acid	Phenylalanine and Tyrosine Metabolism
1417574_at	chemokine (C-X-C motif) ligand 12	RG	Mus musculus			glycerol 2-phosphate	Xenobiotics	Chemical
1417639_at	solute carrier family 22 (organic cation transporter), member 4	RG	Mus musculus			1-stearoylglycerol (1-monostearin)	Lipid	Monoacylglycerol
1417686_at	lectin, galactose binding, soluble 12	RG	Mus musculus			1-arachidonoylglycerophosphocholine (20:4n6)*	Lipid	Lysolipid
1417741_at	liver glycogen phosphorylase	RG	Mus musculus			caprate (10:0)	Lipid	Medium Chain Fatty Acid
1417765_a_at	amylase 1, salivary	RG	Mus musculus			1-arachidonoylglycerophosphoinositol*	Lipid	Lysolipid
1417851_at	chemokine (C-X-C motif) ligand 13	RG	Mus musculus			1-palmitoylglycerophosphoinositol*	Lipid	Lysolipid
1417858_at	RAS protein activator like 1 (GAP1 like)	RG	Mus musculus			1-stearoylglycerophosphoinositol	Lipid	Lysolipid
1417863_at	spermatogenesis associated 19	RG	Mus musculus			fructose	Carbohydrate	Fructose, Mannose and Galactose Metabolism
1417872_at	four and a half LIM domains 1	RG	Mus musculus			N-acetylglucosamine 6-phosphate	Carbohydrate	Aminosugar Metabolism
1417877_at	endonuclease/exonuclease/phosphatase family domain containing 1	RG	Mus musculus			N-acetyl-aspartyl-glutamate (NAAG)	Amino Acid	Glutamate Metabolism
1417933_at	insulin-like growth factor binding protein 6	RG	Mus musculus			cholesterol	Lipid	Sterol
1418003_at	RIKEN cDNA 1190002H23 gene	RG	Mus musculus			glycerophosphorylcholine (GPC)	Lipid	Phospholipid Metabolism
1418091_at	transcription factor CP2-like 1	RG	Mus musculus			ribose	Carbohydrate	Pentose Metabolism
1418094_s_at	carbonic anhydrase 4	RG	Mus musculus			urea	Amino Acid	Urea cycle; Arginine and Proline Metabolism
1418197_at	uncoupling protein 1 (mitochondrial, proton carrier)	RG	Mus musculus			3-ureidopropionate	Nucleotide	Pyrimidine Metabolism, Uracil containing
1418243_at	ficolin A	RG	Mus musculus			ethanolamine	Lipid	Phospholipid Metabolism
1418278_at	apolipoprotein C-III	RG	Mus musculus			nicotinamide adenine dinucleotide (NAD+)	Cofactors and Vitamins	Nicotinate and Nicotinamide Metabolism
1418370_at	troponin C, cardiac/slow skeletal	RG	Mus musculus			docosahexaenoate (DHA; 22:6n3)	Lipid	Polyunsaturated Fatty Acid (n3 and n6)
1418424_at	similar to TNF-stimulated gene 6 protein; tumor necrosis factor alpha induced protein 6	RG	Mus musculus			gamma-glutamylglutamate	Peptide	Gamma-glutamyl Amino Acid
1418472_at	aspartoacylase	RG	Mus musculus			mannitol	Carbohydrate	Fructose, Mannose and Galactose Metabolism
1418486_at	vanin 1	RG	Mus musculus			chiro-inositol	Lipid	Inositol Metabolism
1418595_at	plasma membrane associated protein, S3-12	RG	Mus musculus			phosphoethanolamine	Lipid	Phospholipid Metabolism
1418652_at	chemokine (C-X-C motif) ligand 9	RG	Mus musculus			5-methyltetrahydrofolate (5MeTHF)	Cofactors and Vitamins	Folate Metabolism
1418697_at	indolethylamine N-methyltransferase	RG	Mus musculus			arachidonate (20:4n6)	Lipid	Polyunsaturated Fatty Acid (n3 and n6)
1418782_at	retinoid X receptor gamma	RG	Mus musculus			nicotinamide	Cofactors and Vitamins	Nicotinate and Nicotinamide Metabolism
1418804_at	succinate receptor 1	RG	Mus musculus			ribitol	Carbohydrate	Pentose Metabolism
1418848_at	aquaporin 7	RG	Mus musculus			1-stearoylglycerophosphoethanolamine	Lipid	Lysolipid
1418849_x_at	aquaporin 7	RG	Mus musculus			docosapentaenoate (n6 DPA; 22:5n6)	Lipid	Polyunsaturated Fatty Acid (n3 and n6)
1418872_at	ATP-binding cassette, sub-family B (MDR/TAP), member 1B	RG	Mus musculus			isoleucine	Amino Acid	Leucine, Isoleucine and Valine Metabolism
1418940_at	sulfotransferase family 1B, member 1	RG	Mus musculus			1-linoleoylglycerol (1-monolinolein)	Lipid	Monoacylglycerol
1418983_at	InaD-like (Drosophila)	RG	Mus musculus			cysteine	Amino Acid	Methionine, Cysteine, SAM and Taurine Metabolism
1419073_at	transmembrane protein with EGF-like and two follistatin-like domains 2	RG	Mus musculus			galactose	Carbohydrate	Fructose, Mannose and Galactose Metabolism
1419136_at	aldo-keto reductase family 1, member C18	RG	Mus musculus			N-acetylmethionine	Amino Acid	Methionine, Cysteine, SAM and Taurine Metabolism
1419144_at	CD163 antigen	RG	Mus musculus			2'-deoxyadenosine 3'-monophosphate	Nucleotide	Purine Metabolism, Adenine containing
1419314_at	tubulointerstitial nephritis antigen	RG	Mus musculus			methylphosphate	Nucleotide	Purine and Pyrimidine Metabolism
1419378_a_at	FXYD domain-containing ion transport regulator 2	RG	Mus musculus			erythronate*	Carbohydrate	Aminosugar Metabolism
1419379_x_at	FXYD domain-containing ion transport regulator 2	RG	Mus musculus			palmitoyl sphingomyelin	Lipid	Sphingolipid Metabolism
1419474_a_at	ets homologous factor	RG	Mus musculus			gamma-glutamylisoleucine*	Peptide	Gamma-glutamyl Amino Acid
1419475_a_at	ets homologous factor	RG	Mus musculus			glutamate	Amino Acid	Glutamate Metabolism
1419495_at	IMP2 inner mitochondrial membrane peptidase-like (S. cerevisiae)	RG	Mus musculus			1-palmitoylplasmenylethanolamine*	Lipid	Lysolipid
1419504_at	similar to monoacylglycerol O-acyltransferase 1; monoacylglycerol O-acyltransferase 1	RG	Mus musculus			xylulose	Carbohydrate	Pentose Metabolism
1419549_at	arginase, liver	RG	Mus musculus			1-oleoylglycerophosphoethanolamine	Lipid	Lysolipid
1419662_at	osteoglycin	RG	Mus musculus			methionine	Amino Acid	Methionine, Cysteine, SAM and Taurine Metabolism
1419663_at	osteoglycin	RG	Mus musculus			phosphate	Energy	Oxidative Phosphorylation
1419721_at	niacin receptor 1	RG	Mus musculus			cytidine-5'-diphosphoethanolamine	Lipid	Phospholipid Metabolism
1419762_at	ubiquitin D	RG	Mus musculus			phenylalanine	Amino Acid	Phenylalanine and Tyrosine Metabolism
1420438_at	orosomucoid 2	RG	Mus musculus			tyrosine	Amino Acid	Phenylalanine and Tyrosine Metabolism
1420444_at	solute carrier family 22 (organic cation transporter), member 3	RG	Mus musculus			1-eicosatrienoylglycerophosphoethanolamine*	Lipid	Lysolipid
1420633_a_at	casein alpha s2-like A	RG	Mus musculus			Ac-Ser-Asp-Lys-Pro-OH	Peptide	Polypeptide
1420654_a_at	glucan (1,4-alpha-), branching enzyme 1	RG	Mus musculus			dihomo-linolenate (20:3n3 or n6)	Lipid	Polyunsaturated Fatty Acid (n3 and n6)
1420655_at	patatin-like phospholipase domain containing 3	RG	Mus musculus			gamma-glutamyltryptophan	Peptide	Gamma-glutamyl Amino Acid
1420664_s_at	protein C receptor, endothelial	RG	Mus musculus			glycine	Amino Acid	Glycine, Serine and Threonine Metabolism
1420712_a_at	hepsin	RG	Mus musculus			tryptophan	Amino Acid	Tryptophan Metabolism
1420722_at	elongation of very long chain fatty acids (FEN1/Elo2, SUR4/Elo3, yeast)-like 3	RG	Mus musculus
1421002_at	angiopoietin-like 2	RG	Mus musculus
1421093_at	solute carrier family 7 (cationic amino acid transporter, y+ system), member 10	RG	Mus musculus
1421134_at	amphiregulin	RG	Mus musculus
1421564_at	serine (or cysteine) peptidase inhibitor, clade A, member 3C	RG	Mus musculus
1421571_a_at	lymphocyte antigen 6 complex, locus C2; lymphocyte antigen 6 complex, locus C1	RG	Mus musculus
1421681_at	neuregulin 4	RG	Mus musculus
1421921_at	serine (or cysteine) peptidase inhibitor, clade A, member 3M	RG	Mus musculus
1422470_at	predicted gene 14506; BCL2/adenovirus E1B interacting protein 3; predicted gene 6532; similar to E1B 19K/Bcl-2-binding protein homolog	RG	Mus musculus
1422561_at	a disintegrin-like and metallopeptidase (reprolysin type) with thrombospondin type 1 motif, 5 (aggrecanase-2) (Adamts5)	RG	Mus musculus
1422602_a_at	wingless-related MMTV integration site 5B	RG	Mus musculus
1422605_at	protein phosphatase 1, regulatory (inhibitor) subunit 1A	RG	Mus musculus
1422606_at	C1q and tumor necrosis factor related protein 3	RG	Mus musculus
1422677_at	diacylglycerol O-acyltransferase 2	RG	Mus musculus
1422678_at	diacylglycerol O-acyltransferase 2	RG	Mus musculus
1423084_at	UDP-Gal:betaGlcNAc beta 1,3-galactosyltransferase, polypeptide 2	RG	Mus musculus
1423166_at	CD36 antigen	RG	Mus musculus
1423284_at	MANSC domain containing 1	RG	Mus musculus
1423439_at	phosphoenolpyruvate carboxykinase 1, cytosolic	RG	Mus musculus
1423488_at	monocyte to macrophage differentiation-associated; similar to monocyte to macrophage differentiation-associated	RG	Mus musculus
1423489_at	monocyte to macrophage differentiation-associated; similar to monocyte to macrophage differentiation-associated	RG	Mus musculus
1423506_a_at	neuronatin	RG	Mus musculus
1423619_at	RAS, dexamethasone-induced 1	RG	Mus musculus
1423627_at	NAD(P)H dehydrogenase, quinone 1	RG	Mus musculus
1423797_at	acetoacetyl-CoA synthetase	RG	Mus musculus
1423866_at	serine (or cysteine) peptidase inhibitor, clade A, member 3K	RG	Mus musculus
1423878_at	glycophorin C	RG	Mus musculus
1423911_at	predicted gene 3353; predicted gene 13142; predicted gene 13169; similar to protein phosphatase 2, regulatory subunit B (B56), alpha isoform; predicted gene 13244; predicted gene 13233; protein phosphatase 2, regulatory subunit B (B56), alpha isoform	RG	Mus musculus
1424007_at	growth differentiation factor 10	RG	Mus musculus
1424008_a_at	predicted gene 3470; RNA binding protein with multiple splicing 2	RG	Mus musculus
1424030_at	grainyhead-like 1 (Drosophila); similar to Grhl1 protein	RG	Mus musculus
1424155_at	fatty acid binding protein 4, adipocyte	RG	Mus musculus
1424266_s_at	expressed sequence AU018778	RG	Mus musculus
1424308_at	solute carrier family 24 (sodium/potassium/calcium exchanger), member 3	RG	Mus musculus
1424357_at	transmembrane protein 45b	RG	Mus musculus
1424400_a_at	similar to Aldehyde dehydrogenase 1 family, member L1; aldehyde dehydrogenase 1 family, member L1	RG	Mus musculus
1424404_at	RIKEN cDNA 0610040J01 gene	RG	Mus musculus
1424524_at	DNA-damage regulated autophagy modulator 1	RG	Mus musculus
1424626_at	RIKEN cDNA 2010003K11 gene	RG	Mus musculus
1424815_at	glycogen synthase 2	RG	Mus musculus
1424842_a_at	Rho GTPase activating protein 24	RG	Mus musculus
1424985_a_at	SRY-box containing gene 10	RG	Mus musculus
1425145_at	interleukin 1 receptor-like 1	RG	Mus musculus
1425215_at	free fatty acid receptor 2	RG	Mus musculus
1425216_at	free fatty acid receptor 2	RG	Mus musculus
1425251_at	prostaglandin E receptor 3 (subtype EP3)	RG	Mus musculus
1425369_a_at	SRY-box containing gene 10	RG	Mus musculus
1425416_s_at	proline/serine-rich coiled-coil 1	RG	Mus musculus
1425809_at	fatty acid binding protein 4, adipocyte	RG	Mus musculus
1425826_a_at	sorbin and SH3 domain containing 1	RG	Mus musculus
1426218_at	similar to glucocorticoid induced transcript 1; predicted gene 5815; glucocorticoid induced transcript 1	RG	Mus musculus
1426225_at	retinol binding protein 4, plasma	RG	Mus musculus
1426340_at	solute carrier family 1 (glial high affinity glutamate transporter), member 3	RG	Mus musculus
1426341_at	solute carrier family 1 (glial high affinity glutamate transporter), member 3	RG	Mus musculus
1426721_s_at	TCDD-inducible poly(ADP-ribose) polymerase	RG	Mus musculus
1426867_at	doublesex and mab-3 related transcription factor 2	RG	Mus musculus
1426869_at	biregional cell adhesion molecule-related/down-regulated by oncogenes (Cdon) binding protein	RG	Mus musculus
1426906_at	similar to Interferon-activatable protein 203 (Ifi-203) (Interferon-inducible protein p203); similar to interferon activated gene 203; interferon activated gene 203	RG	Mus musculus
1427183_at	epidermal growth factor-containing fibulin-like extracellular matrix protein 1	RG	Mus musculus
1427213_at	6-phosphofructo-2-kinase/fructose-2,6-biphosphatase 1	RG	Mus musculus
1427277_at	sine oculis-related homeobox 1 homolog (Drosophila)	RG	Mus musculus
1427339_at	similar to solute carrier family 30, member 2; solute carrier family 30 (zinc transporter), member 2	RG	Mus musculus
1427345_a_at	sulfotransferase family 1A, phenol-preferring, member 1	RG	Mus musculus
1428538_s_at	retinoic acid receptor responder (tazarotene induced) 2	RG	Mus musculus
1430306_a_at	ATPase, H+ transporting, lysosomal V1 subunit C2	RG	Mus musculus
1430889_a_at	thiopurine methyltransferase	RG	Mus musculus
1434484_at	WAP four-disulfide core domain 21	RG	Mus musculus
1435870_at	synaptonemal complex protein 3	RG	Mus musculus
1436170_a_at	casein alpha s2-like A	RG	Mus musculus
1436737_a_at	sorbin and SH3 domain containing 1	RG	Mus musculus
1436991_x_at	gelsolin	RG	Mus musculus
1437171_x_at	gelsolin	RG	Mus musculus
1437644_at	UDP-Gal:betaGlcNAc beta 1,3-galactosyltransferase, polypeptide 2	RG	Mus musculus
1437902_s_at	retinoic acid receptor responder (tazarotene induced) 2	RG	Mus musculus
1438082_at	transmembrane protein 206	RG	Mus musculus
1438511_a_at	RIKEN cDNA 1190002H23 gene	RG	Mus musculus
1438694_at	casein alpha s2-like A	RG	Mus musculus
1439373_x_at	wingless-related MMTV integration site 5B	RG	Mus musculus
1448136_at	ectonucleotide pyrophosphatase/phosphodiesterase 2	RG	Mus musculus
1448250_at	CXADR-like membrane protein (Clmp)	RG	Mus musculus
1448251_at	CXADR-like membrane protein (Clmp)	RG	Mus musculus
1448649_at	glutamyl aminopeptidase	RG	Mus musculus
1448730_at	carboxypeptidase A3, mast cell	RG	Mus musculus
1448823_at	chemokine (C-X-C motif) ligand 12	RG	Mus musculus
1448842_at	cysteine dioxygenase 1, cytosolic	RG	Mus musculus
1448859_at	chemokine (C-X-C motif) ligand 13	RG	Mus musculus
1448925_at	twist homolog 2 (Drosophila)	RG	Mus musculus
1448949_at	carbonic anhydrase 4	RG	Mus musculus
1448995_at	platelet factor 4	RG	Mus musculus
1449038_at	hydroxysteroid 11-beta dehydrogenase 1	RG	Mus musculus
1449147_at	carbohydrate (keratan sulfate Gal-6) sulfotransferase 1	RG	Mus musculus
1449158_at	potassium channel, subfamily K, member 2	RG	Mus musculus
1449319_at	R-spondin homolog (Xenopus laevis)	RG	Mus musculus
1449396_at	amine oxidase, copper containing 3	RG	Mus musculus
1449456_a_at	chymase 1, mast cell	RG	Mus musculus
1449466_at	C-type lectin domain family 3, member b	RG	Mus musculus
1449534_at	synaptonemal complex protein 3	RG	Mus musculus
1449592_at	transcription factor 15	RG	Mus musculus
1450240_a_at	synaptotagmin-like 1; similar to synaptotagmin-like 1	RG	Mus musculus
1450344_a_at	prostaglandin E receptor 3 (subtype EP3)	RG	Mus musculus
1450639_at	solute carrier family 28 (sodium-coupled nucleoside transporter), member 2	RG	Mus musculus
1450805_at	sarcoglycan, delta (dystrophin-associated glycoprotein)	RG	Mus musculus
1450883_a_at	CD36 antigen	RG	Mus musculus
1450884_at	CD36 antigen	RG	Mus musculus
1451054_at	orosomucoid 1	RG	Mus musculus
1451263_a_at	fatty acid binding protein 4, adipocyte	RG	Mus musculus
1451322_at	carboxymethylenebutenolidase-like (Pseudomonas)	RG	Mus musculus
1451371_at	melanocortin 2 receptor accessory protein	RG	Mus musculus
1451375_at	ets homologous factor	RG	Mus musculus
1451511_at	3-hydroxyisobutyryl-Coenzyme A hydrolase	RG	Mus musculus
1451512_s_at	3-hydroxyisobutyryl-Coenzyme A hydrolase	RG	Mus musculus
1451527_at	procollagen C-endopeptidase enhancer 2	RG	Mus musculus
1451689_a_at	SRY-box containing gene 10	RG	Mus musculus
1451698_at	proline/serine-rich coiled-coil 1	RG	Mus musculus
1451972_at	similar to glucocorticoid induced transcript 1; predicted gene 5815; glucocorticoid induced transcript 1	RG	Mus musculus
1452031_at	solute carrier family 1 (glial high affinity glutamate transporter), member 3	RG	Mus musculus
1452160_at	TCDD-inducible poly(ADP-ribose) polymerase	RG	Mus musculus
1452161_at	TCDD-inducible poly(ADP-ribose) polymerase	RG	Mus musculus
1452231_x_at	similar to Interferon-activatable protein 203 (Ifi-203) (Interferon-inducible protein p203); similar to interferon activated gene 203; interferon activated gene 203	RG	Mus musculus
1452260_at	cell death-inducing DFFA-like effector c	RG	Mus musculus
1452348_s_at	predicted gene 2785	RG	Mus musculus
1452349_x_at	interferon activated gene 205	RG	Mus musculus
1452592_at	microsomal glutathione S-transferase 2	RG	Mus musculus
1455579_at	casein alpha s2-like A	RG	Mus musculus
1455901_at	RIKEN cDNA 7120451J01 gene; choline phosphotransferase 1	RG	Mus musculus
1456312_x_at	gelsolin	RG	Mus musculus
1456568_at	gelsolin	RG	Mus musculus
1456569_x_at	gelsolin	RG	Mus musculus
1456676_a_at	6-phosphofructo-2-kinase/fructose-2,6-biphosphatase 3	RG	Mus musculus
1460693_a_at	collagen, type IX, alpha 3	RG	Mus musculus
1460714_at	transcription factor CP2-like 1	RG	Mus musculus
1460715_x_at	transcription factor CP2-like 1	RG	Mus musculus

## Sheet: Gene-Gene hubs
Gene Hubs
AFFYMETRIX_3PRIME_IVT_ID	Gene Name	Related Genes	Species
1416072_at	CD34 antigen	RG	Mus musculus
1416432_at	6-phosphofructo-2-kinase/fructose-2,6-biphosphatase 3	RG	Mus musculus
1416564_at	SRY-box containing gene 7	RG	Mus musculus
1416629_at	solute carrier family 1 (neutral amino acid transporter), member 5	RG	Mus musculus
1416808_at	similar to Nidogen precursor (Entactin); nidogen 1; similar to Nid1 protein	RG	Mus musculus
1416933_at	P450 (cytochrome) oxidoreductase	RG	Mus musculus
1416978_at	Fc receptor, IgG, alpha chain transporter	RG	Mus musculus
1416992_at	MFNG O-fucosylpeptide 3-beta-N-acetylglucosaminyltransferase (Mfng)	RG	Mus musculus
1417009_at	complement component 1, r subcomponent; predicted gene 8551	RG	Mus musculus
1417164_at	dual specificity phosphatase 10	RG	Mus musculus
1417178_at	GIPC PDZ domain containing family, member 2	RG	Mus musculus
1417323_at	proline/serine-rich coiled-coil 1	RG	Mus musculus
1417429_at	flavin containing monooxygenase 1	RG	Mus musculus
1417680_at	potassium voltage-gated channel, shaker-related subfamily, member 5	RG	Mus musculus
1417858_at	RAS protein activator like 1 (GAP1 like)	RG	Mus musculus
1417863_at	spermatogenesis associated 19	RG	Mus musculus
1417933_at	insulin-like growth factor binding protein 6	RG	Mus musculus
1418094_s_at	carbonic anhydrase 4	RG	Mus musculus
1418320_at	protease, serine, 8 (prostasin)	RG	Mus musculus
1418496_at	forkhead box A1; similar to Hepatocyte nuclear factor 3-alpha (HNF-3A) (Forkhead box protein A1)	RG	Mus musculus
1418835_at	pleckstrin homology-like domain, family A, member 1	RG	Mus musculus
1418848_at	aquaporin 7	RG	Mus musculus
1418849_x_at	aquaporin 7	RG	Mus musculus
1418940_at	sulfotransferase family 1B, member 1	RG	Mus musculus
1418979_at	aldo-keto reductase family 1, member C14	RG	Mus musculus
1419073_at	transmembrane protein with EGF-like and two follistatin-like domains 2	RG	Mus musculus
1419301_at	frizzled homolog 4 (Drosophila)	RG	Mus musculus
1419475_a_at	ets homologous factor	RG	Mus musculus
1419549_at	arginase, liver	RG	Mus musculus
1420664_s_at	protein C receptor, endothelial	RG	Mus musculus
1420683_at	BCL2/adenovirus E1B 19kD interacting protein like	RG	Mus musculus
1420712_a_at	hepsin	RG	Mus musculus
1421038_a_at	potassium intermediate/small conductance calcium-activated channel, subfamily N, member 4	RG	Mus musculus
1421404_at	chemokine (C-X-C motif) ligand 15	RG	Mus musculus
1421571_a_at	lymphocyte antigen 6 complex, locus C2; lymphocyte antigen 6 complex, locus C1	RG	Mus musculus
1421766_at	ubiquitin carboxyl-terminal esterase L4	RG	Mus musculus
1422293_a_at	potassium channel tetramerisation domain containing 1	RG	Mus musculus
1422561_at	a disintegrin-like and metallopeptidase (reprolysin type) with thrombospondin type 1 motif, 5 (aggrecanase-2) (Adamts5)	RG	Mus musculus
1422587_at	transmembrane protein 45a	RG	Mus musculus
1422606_at	C1q and tumor necrosis factor related protein 3	RG	Mus musculus
1422748_at	zinc finger E-box binding homeobox 2	RG	Mus musculus
1423276_at	immunoglobulin-like domain containing receptor 1	RG	Mus musculus
1423488_at	monocyte to macrophage differentiation-associated; similar to monocyte to macrophage differentiation-associated	RG	Mus musculus
1423489_at	monocyte to macrophage differentiation-associated; similar to monocyte to macrophage differentiation-associated	RG	Mus musculus
1423858_a_at	3-hydroxy-3-methylglutaryl-Coenzyme A synthase 2	RG	Mus musculus
1423878_at	glycophorin C	RG	Mus musculus
1424030_at	grainyhead-like 1 (Drosophila); similar to Grhl1 protein	RG	Mus musculus
1424186_at	coiled-coil domain containing 80	RG	Mus musculus
1424187_at	coiled-coil domain containing 80	RG	Mus musculus
1424266_s_at	expressed sequence AU018778	RG	Mus musculus
1425104_at	potassium channel tetramerisation domain containing 1	RG	Mus musculus
1425416_s_at	proline/serine-rich coiled-coil 1	RG	Mus musculus
1425606_at	solute carrier family 5 (iodide transporter), member 8	RG	Mus musculus
1425784_a_at	olfactomedin 1	RG	Mus musculus
1426235_a_at	predicted gene 4949; glutamate-ammonia ligase (glutamine synthetase)	RG	Mus musculus
1426236_a_at	predicted gene 4949; glutamate-ammonia ligase (glutamine synthetase)	RG	Mus musculus
1426562_a_at	olfactomedin 1	RG	Mus musculus
1426634_at	solute carrier family 5 (sodium/glucose cotransporter), member 9	RG	Mus musculus
1426708_at	anthrax toxin receptor 2	RG	Mus musculus
1426914_at	MARVEL (membrane-associating) domain containing 2	RG	Mus musculus
1427213_at	6-phosphofructo-2-kinase/fructose-2,6-biphosphatase 1	RG	Mus musculus
1427345_a_at	sulfotransferase family 1A, phenol-preferring, member 1	RG	Mus musculus
1435945_a_at	potassium intermediate/small conductance calcium-activated channel, subfamily N, member 4	RG	Mus musculus
1439018_at	FH2 domain containing 1	RG	Mus musculus
1448250_at	CXADR-like membrane protein (Clmp)	RG	Mus musculus
1448251_at	CXADR-like membrane protein (Clmp)	RG	Mus musculus
1448529_at	thrombomodulin	RG	Mus musculus
1448839_at	KN motif and ankyrin repeat domains 3	RG	Mus musculus
1448842_at	cysteine dioxygenase 1, cytosolic	RG	Mus musculus
1448919_at	CD302 antigen	RG	Mus musculus
1448925_at	twist homolog 2 (Drosophila)	RG	Mus musculus
1448949_at	carbonic anhydrase 4	RG	Mus musculus
1448995_at	platelet factor 4	RG	Mus musculus
1449145_a_at	caveolin 1, caveolae protein	RG	Mus musculus
1449158_at	potassium channel, subfamily K, member 2	RG	Mus musculus
1449319_at	R-spondin homolog (Xenopus laevis)	RG	Mus musculus
1449396_at	amine oxidase, copper containing 3	RG	Mus musculus
1449416_at	frizzled homolog 4 (Drosophila)	RG	Mus musculus
1450658_at	similar to a disintegrin-like and metalloprotease (reprolysin type) with thrombospondin type 1 motif, 5 (aggrecanase-2)	RG	Mus musculus
1451375_at	ets homologous factor	RG	Mus musculus
1452136_at	solute carrier family 5 (sodium/glucose cotransporter), member 9	RG	Mus musculus
1452244_at	RIKEN cDNA 6330406I15 gene; mesenteric estrogen dependent adipogenesis	RG	Mus musculus
1452919_a_at	phosphoglycolate phosphatase	RG	Mus musculus
1453317_a_at	KH domain containing, RNA binding, signal transduction associated 3	RG	Mus musculus
1453596_at	inhibitor of DNA binding 2	RG	Mus musculus
1456629_at	KN motif and ankyrin repeat domains 3	RG	Mus musculus
1456676_a_at	6-phosphofructo-2-kinase/fructose-2,6-biphosphatase 3	RG	Mus musculus

## Sheet: Met-Met Hubs
Metabolite hub	Super pathway	Sub pathway
1-arachidonoylglycerophosphoinositol*	Lipid	Lysolipid
glycine	Amino Acid	Glycine, Serine and Threonine Metabolism
methionine	Amino Acid	Methionine, Cysteine, SAM and Taurine Metabolism
uracil	Nucleotide	Pyrimidine Metabolism, Uracil containing
2-arachidonoylglycerophosphoethanolamine*	Lipid	Lysolipid
cholesterol	Lipid	Sterol
phosphate	Energy	Oxidative Phosphorylation
alanine	Amino Acid	Alanine and Aspartate Metabolism
fructose	Carbohydrate	Fructose, Mannose and Galactose Metabolism
leucine	Amino Acid	Leucine, Isoleucine and Valine Metabolism
phenylalanine	Amino Acid	Phenylalanine and Tyrosine Metabolism
valine	Amino Acid	Leucine, Isoleucine and Valine Metabolism
cholestanol	Lipid	Sterol
xanthine	Nucleotide	Purine Metabolism, (Hypo)Xanthine/Inosine containing
glutamate, gamma-methyl ester	Amino Acid	Glutamate Metabolism
proline	Amino Acid	Urea cycle; Arginine and Proline Metabolism
tyrosine	Amino Acid	Phenylalanine and Tyrosine Metabolism
isoleucine	Amino Acid	Leucine, Isoleucine and Valine Metabolism
glycerol 2-phosphate	Xenobiotics	Chemical
threonine	Amino Acid	Glycine, Serine and Threonine Metabolism
trans-4-hydroxyproline	Amino Acid	Urea cycle; Arginine and Proline Metabolism
1-arachidonoylglycerophosphocholine (20:4n6)*	Lipid	Lysolipid
glutamate	Amino Acid	Glutamate Metabolism
N6-acetyllysine	Amino Acid	Lysine Metabolism
N-acetylmethionine	Amino Acid	Methionine, Cysteine, SAM and Taurine Metabolism
nicotinamide	Cofactors and Vitamins	Nicotinate and Nicotinamide Metabolism
riboflavin (Vitamin B2)	Cofactors and Vitamins	Riboflavin Metabolism
sedoheptulose-7-phosphate	Carbohydrate	Pentose Phosphate Pathway
tryptophan	Amino Acid	Tryptophan Metabolism
glucose-6-phosphate (G6P)	Carbohydrate	Glycolysis, Gluconeogenesis, and Pyruvate Metabolism
asparagine	Amino Acid	Alanine and Aspartate Metabolism
erythronate*	Carbohydrate	Aminosugar Metabolism
fumarate	Energy	TCA Cycle
fructose-6-phosphate	Carbohydrate	Glycolysis, Gluconeogenesis, and Pyruvate Metabolism
campesterol	Lipid	Sterol
methylphosphate	Nucleotide	Purine and Pyrimidine Metabolism
1-stearoylglycerol (1-monostearin)	Lipid	Monoacylglycerol
laurate (12:0)	Lipid	Medium Chain Fatty Acid
1-stearoylglycerophosphoinositol	Lipid	Lysolipid
gamma-glutamylglutamate	Peptide	Gamma-glutamyl Amino Acid
histidine	Amino Acid	Histidine Metabolism
serine	Amino Acid	Glycine, Serine and Threonine Metabolism
beta-alanine	Nucleotide	Pyrimidine Metabolism, Uracil containing
glycerophosphorylcholine (GPC)	Lipid	Phospholipid Metabolism
mannose-6-phosphate	Carbohydrate	Fructose, Mannose and Galactose Metabolism
N-acetylthreonine	Amino Acid	Glycine, Serine and Threonine Metabolism
pseudouridine	Nucleotide	Pyrimidine Metabolism, Uracil containing
ribitol	Carbohydrate	Pentose Metabolism
2-aminoadipate	Amino Acid	Lysine Metabolism
2-palmitoylglycerophosphoethanolamine*	Lipid	Lysolipid
adenosine 5'diphosphoribose	Cofactors and Vitamins	Nicotinate and Nicotinamide Metabolism
lactate	Carbohydrate	Glycolysis, Gluconeogenesis, and Pyruvate Metabolism
aspartate	Amino Acid	Alanine and Aspartate Metabolism
phenylacetylglycine	Amino Acid	Phenylalanine and Tyrosine Metabolism
acetylphosphate	Energy	Oxidative Phosphorylation
adenine	Nucleotide	Purine Metabolism, Adenine containing
ornithine	Amino Acid	Urea cycle; Arginine and Proline Metabolism
palmitoyl sphingomyelin	Lipid	Sphingolipid Metabolism
dimethylarginine (SDMA + ADMA)	Amino Acid	Urea cycle; Arginine and Proline Metabolism
N-acetylalanine	Amino Acid	Alanine and Aspartate Metabolism
trans-urocanate	Amino Acid	Histidine Metabolism
urea	Amino Acid	Urea cycle; Arginine and Proline Metabolism
1-palmitoylplasmenylethanolamine*	Lipid	Lysolipid
fucose	Carbohydrate	Pentose Metabolism
sarcosine (N-Methylglycine)	Amino Acid	Glycine, Serine and Threonine Metabolism
C-glycosyltryptophan*	Amino Acid	Tryptophan Metabolism
mannitol	Carbohydrate	Fructose, Mannose and Galactose Metabolism
5-methylthioadenosine (MTA)	Amino Acid	Polyamine Metabolism
Ac-Ser-Asp-Lys-Pro-OH	Peptide	Polypeptide
adenosine 2'-monophosphate (2'-AMP)	Nucleotide	Purine Metabolism, Adenine containing
homoserine	Amino Acid	Glycine, Serine and Threonine Metabolism
inositol 1-phosphate (I1P)	Lipid	Inositol Metabolism
lysine	Amino Acid	Lysine Metabolism
pelargonate (9:0)	Lipid	Medium Chain Fatty Acid

## Sheet: Gene-Met Connections
Gene-Met Hubs
Gene-Met	Number of Connections
1416639_at	90
1418697_at	90
1421921_at	88
1421564_at	87
1450884_at	87
1424008_a_at	86
1424626_at	86
1417741_at	85
1451322_at	85
1450639_at	84
1418243_at	83
1422678_at	83
1424815_at	83
1422677_at	82
1450883_a_at	82
1417639_at	81
1419073_at	80
1423166_at	80
1421681_at	79
1451371_at	78
1419136_at	77
1422602_a_at	77
1425216_at	77
1425826_a_at	77
1418652_at	76
1449456_a_at	76
1420654_a_at	75
1450344_a_at	75
1417765_a_at	74
1419314_at	74
1448949_at	74
1451527_at	74
1451972_at	74
1439373_x_at	73
1418094_s_at	72
1423439_at	72
1451512_s_at	72
1427183_at	71
1448730_at	71
1449466_at	71
1455901_at	71
1438511_a_at	70
1460693_a_at	70
1423866_at	69
1424308_at	69
1425215_at	69
1434484_at	69
1416623_at	68
1416992_at	68
1417877_at	68
1418197_at	68
1418804_at	68
1419504_at	68
1424357_at	68
1426867_at	68
1417358_s_at	67
1419762_at	67
1449038_at	67
1418782_at	66
1418848_at	66
1423797_at	66
1424266_s_at	66
1427339_at	66
1417347_at	65
1423489_at	65
1427345_a_at	65
1418091_at	64
1423488_at	64
1426225_at	64
1420444_at	63
1448995_at	63
1415994_at	62
1436737_a_at	62
1417346_at	61
1418003_at	61
1423084_at	61
1423506_a_at	61
1452349_x_at	61
1448649_at	60
1448842_at	60
1448925_at	60
1419495_at	58
1424007_at	58
1420655_at	56
1421002_at	56
1423911_at	56
1418424_at	55
1420438_at	55
1427213_at	55
1417574_at	54
1451698_at	54
1452231_x_at	54
1452348_s_at	54
1417851_at	53
1418486_at	53
1418983_at	53
1426906_at	53
1437644_at	53
1449592_at	53
1417323_at	52
1416432_at	51
1418472_at	51
1419144_at	51
1419721_at	51
1448859_at	51
1451511_at	51
1416676_at	50
1418872_at	50
1420664_s_at	50
1415812_at	49
1417133_at	49
1425416_s_at	49
1452260_at	49
1416933_at	48
1417404_at	48
1420712_a_at	48
1420722_at	48
1430306_a_at	48
1416527_at	47
1418370_at	47
1422605_at	47
1437171_x_at	47
1448136_at	47
1423619_at	46
1451054_at	46
1424400_a_at	45
1436991_x_at	45
1456312_x_at	45
1460715_x_at	45
1417318_at	43
1417403_at	43
1418278_at	43
1418595_at	43
1435870_at	43
1451375_at	43
1417009_at	42
1417872_at	42
1418849_x_at	42
1419474_a_at	42
1419663_at	42
1437902_s_at	42
1449147_at	42
1460714_at	42
1416318_at	41
1417933_at	41
1419662_at	41
1455579_at	41
1418940_at	40
1420633_a_at	40
1422606_at	40
1424030_at	40
1426218_at	40
1436170_a_at	40
1438694_at	40
1416629_at	39
1424842_a_at	39
1425251_at	39
1438082_at	39
1452031_at	39
1419379_x_at	38
1419475_a_at	38
1421093_at	38
1424155_at	38
1426340_at	38
1427277_at	38
1428538_s_at	38
1451263_a_at	38
1452592_at	38
1425145_at	37
1425369_a_at	37
1426341_at	37
1415894_at	36
1424985_a_at	36
1448251_at	36
1450805_at	36
1417023_a_at	35
1417863_at	35
1423627_at	35
1424524_at	35
1448250_at	35
1451689_a_at	35
1448823_at	34
1449158_at	34
1449534_at	34
1452160_at	34
1456676_a_at	34
1416564_at	33
1417858_at	33
1419378_a_at	33
1419549_at	33
1452161_at	33
1456568_at	33
1456569_x_at	33
1416630_at	32
1417686_at	32
1421134_at	32
1422561_at	32
1426721_s_at	32
1426869_at	32
1449319_at	32
1449396_at	32
1421571_a_at	31
1422470_at	31
1423284_at	31
1423878_at	31
1424404_at	31
1425809_at	31
1430889_a_at	31
1450240_a_at	31

## Sheet: Common Hubs
Metabolite hubs				Gene Hubs
Common Metabolite Hubs	Sub	Super		AFFYMETRIX_3PRIME_IVT_ID	Gene Name	Related Genes	Species
glutamate	Glutamate Metabolism	Amino Acid		1416432_at	6-phosphofructo-2-kinase/fructose-2,6-biphosphatase 3	RG	Mus musculus
glycine	Glycine, Serine and Threonine Metabolism			1416564_at	SRY-box containing gene 7	RG	Mus musculus
isoleucine	Leucine, Isoleucine and Valine Metabolism			1416629_at	solute carrier family 1 (neutral amino acid transporter), member 5	RG	Mus musculus
methionine	Methionine, Cysteine, SAM and Taurine Metabolism			1416933_at	P450 (cytochrome) oxidoreductase	RG	Mus musculus
N-acetylmethionine				1416992_at	MFNG O-fucosylpeptide 3-beta-N-acetylglucosaminyltransferase (Mfng)	RG	Mus musculus
phenylacetylglycine	Phenylalanine and Tyrosine Metabolism			1417009_at	complement component 1, r subcomponent; predicted gene 8551	RG	Mus musculus
phenylalanine				1417323_at	proline/serine-rich coiled-coil 1 (Psrc1)	RG	Mus musculus
tyrosine				1417858_at	RAS protein activator like 1 (GAP1 like)	RG	Mus musculus
tryptophan	Tryptophan Metabolism			1417863_at	spermatogenesis associated 19	RG	Mus musculus
ornithine	Urea cycle; Arginine and Proline Metabolism			1417933_at	insulin-like growth factor binding protein 6	RG	Mus musculus
urea				1418094_s_at	carbonic anhydrase 4	RG	Mus musculus
erythronate*	Aminosugar Metabolism	Carbohydrate		1418848_at	aquaporin 7	RG	Mus musculus
fructose	Fructose, Mannose and Galactose Metabolism			1418849_x_at	aquaporin 7	RG	Mus musculus
mannitol				1418940_at	sulfotransferase family 1B, member 1	RG	Mus musculus
ribitol	Pentose Metabolism			1419073_at	transmembrane protein with EGF-like and two follistatin-like domains 2	RG	Mus musculus
adenosine 5'diphosphoribose	Nicotinate and Nicotinamide Metabolism	Cofactors and Vitamins		1419475_a_at	ets homologous factor (Ehf)	RG	Mus musculus
nicotinamide				1419549_at	arginase, liver	RG	Mus musculus
phosphate	Oxidative Phosphorylation	Energy		1420664_s_at	protein C receptor, endothelial	RG	Mus musculus
inositol 1-phosphate (I1P)	Inositol Metabolism	Lipid		1420712_a_at	hepsin	RG	Mus musculus
1-arachidonoylglycerophosphocholine (20:4n6)*	Lysolipid			1421571_a_at	lymphocyte antigen 6 complex, locus C2; lymphocyte antigen 6 complex, locus C1	RG	Mus musculus
1-arachidonoylglycerophosphoinositol*				1422561_at	a disintegrin-like and metallopeptidase (reprolysin type) with thrombospondin type 1 motif, 5 (aggrecanase-2) (Adamts5)	RG	Mus musculus
1-palmitoylplasmenylethanolamine*				1422606_at	C1q and tumor necrosis factor related protein 3	RG	Mus musculus
1-stearoylglycerophosphoinositol				1423488_at	monocyte to macrophage differentiation-associated; similar to monocyte to macrophage differentiation-associated (Mmd)	RG	Mus musculus
2-palmitoylglycerophosphoethanolamine*				1423489_at	monocyte to macrophage differentiation-associated; similar to monocyte to macrophage differentiation-associated (Mmd)	RG	Mus musculus
pelargonate (9:0)	Medium Chain Fatty Acid			1423878_at	glycophorin C	RG	Mus musculus
1-stearoylglycerol (1-monostearin)	Monoacylglycerol			1424030_at	grainyhead-like 1 (Drosophila); similar to Grhl1 protein	RG	Mus musculus
glycerophosphorylcholine (GPC)	Phospholipid Metabolism			1424266_s_at	carboxylesterase 1F (Ces1f)	RG	Mus musculus
palmitoyl sphingomyelin	Sphingolipid Metabolism			1425416_s_at	proline/serine-rich coiled-coil 1 (Psrc1)	RG	Mus musculus
campesterol	Sterol			1427213_at	6-phosphofructo-2-kinase/fructose-2,6-biphosphatase 1	RG	Mus musculus
cholestanol				1427345_a_at	sulfotransferase family 1A, phenol-preferring, member 1	RG	Mus musculus
cholesterol				1448250_at	CXADR-like membrane protein (Clmp)	RG	Mus musculus
methylphosphate	Purine and Pyrimidine Metabolism	Nucleotide		1448251_at	CXADR-like membrane protein (Clmp)	RG	Mus musculus
gamma-glutamylglutamate	Gamma-glutamyl Amino Acid	Peptide		1448842_at	cysteine dioxygenase 1, cytosolic	RG	Mus musculus
Ac-Ser-Asp-Lys-Pro-OH	Polypeptide			1448925_at	twist homolog 2 (Drosophila)	RG	Mus musculus
glycerol 2-phosphate	Chemical	Xenobiotics		1448949_at	carbonic anhydrase 4 (Car4)	RG	Mus musculus
				1448995_at	platelet factor 4	RG	Mus musculus
				1449158_at	potassium channel, subfamily K, member 2	RG	Mus musculus
				1449319_at	R-spondin-1	RG	Mus musculus
				1449396_at	amine oxidase, copper containing 3	RG	Mus musculus
				1451375_at	ets homologous factor (Ehf)	RG	Mus musculus
				1456676_a_at	6-phosphofructo-2-kinase/fructose-2,6-biphosphatase 3	RG	Mus musculus

## Sheet: Gene-Met Raw data
genename	metname	pvalue		metabolite
1449456_a_at	125	9.66e-08		beta-alanine
1417429_at	18	8.85e-07		1-hexadecanol
1451527_at	201	3.16e-06		glycerophosphorylcholine (GPC)
1421404_at	18	4.02e-06		1-hexadecanol
1421564_at	173	4.32e-06		fructose
1450883_a_at	176	5.06e-06		fumarate
1416978_at	18	5.3e-06		1-hexadecanol
1418697_at	11	5.86e-06		1-arachidonoylglycerophosphoinositol*
1449158_at	282	6.2e-06		N-glycolylneuraminate
1450639_at	230	6.89e-06		isoleucine
1424008_a_at	316	8.84e-06		proline
1417858_at	152	9.15e-06		cytidine 5'-monophosphate (5'-CMP)
1419474_a_at	102	1.06e-05		adrenate (22:4n6)
1455099_at	155	1.16e-05		dehydroascorbate
1451527_at	180	1.33e-05		gamma-glutamylglutamate
1424439_at	169	1.33e-05		erythritol
1426662_at	114	1.47e-05		arabitol
1423166_at	176	1.55e-05		fumarate
1426225_at	100	1.57e-05		adenosine 5'diphosphoribose
1435945_a_at	66	1.59e-05		2-oleoylglycerophosphoethanolamine*
1450883_a_at	351	1.64e-05		threonine
1419136_at	214	1.67e-05		histidine
1423911_at	299	1.68e-05		pelargonate (9:0)
1438511_a_at	174	1.7e-05		fructose-6-phosphate
1416639_at	173	1.73e-05		fructose
1417464_at	348	1.76e-05		tauro(alpha + beta)muricholate
1451371_at	131	1.78e-05		campesterol
1419475_a_at	102	1.84e-05		adrenate (22:4n6)
1418486_at	32	1.9e-05		1-oleoylplasmenylethanolamine*
1418804_at	299	1.9e-05		pelargonate (9:0)
1451527_at	324	1.95e-05		ribitol
1438511_a_at	358	2.03e-05		trans-urocanate
1454159_a_at	64	2.21e-05		2-methylbutyrylcarnitine (C5)
1448775_at	156	2.24e-05		deoxycarnitine
1419504_at	95	2.26e-05		Ac-Ser-Asp-Lys-Pro-OH
1418184_at	132	2.29e-05		caprate (10:0)
1423166_at	351	2.35e-05		threonine
1423866_at	95	2.37e-05		Ac-Ser-Asp-Lys-Pro-OH
1460693_a_at	290	2.49e-05		ornithine
1451375_at	102	2.57e-05		adrenate (22:4n6)
1415921_a_at	232	2.61e-05		isoleucylaspartate
1449147_at	34	2.73e-05		1-palmitoylglycerol (1-monopalmitin)
1418496_at	282	2.78e-05		N-glycolylneuraminate
1424404_at	284	2.83e-05		nicotinamide adenine dinucleotide (NAD+)
1420712_a_at	31	2.84e-05		1-oleoylglycerophosphoserine
1418599_at	28	2.88e-05		1-oleoylglycerophosphoethanolamine
1417323_at	225	2.92e-05		inositol 1-phosphate (I1P)
1426236_a_at	114	3.02e-05		arabitol
1417358_s_at	364	3.02e-05		urea
1424464_s_at	61	3.04e-05		2-linoleoylglycerol (2-monolinolein)
1432190_at	17	3.08e-05		1-eicosenoylglycerophosphocholine (20:1n9)*
1427339_at	134	3.12e-05		carnosine
1449592_at	299	3.13e-05		pelargonate (9:0)
1424382_at	151	3.17e-05		cytidine 5'-diphosphocholine
1451940_x_at	235	3.18e-05		isovalerylcarnitine
1419643_s_at	259	3.35e-05		mead acid (20:3n9)
1425917_at	49	3.55e-05		2'-deoxyadenosine 3'-monophosphate
1416527_at	102	3.55e-05		adrenate (22:4n6)
1425784_a_at	152	3.6e-05		cytidine 5'-monophosphate (5'-CMP)
1417765_a_at	100	3.66e-05		adenosine 5'diphosphoribose
1422561_at	26	3.76e-05		1-oleoylglycerol (1-monoolein)
1430998_at	154	3.79e-05		cytidine-5'-diphosphoethanolamine
1425216_at	316	3.89e-05		proline
1420654_a_at	190	4.01e-05		glucose-6-phosphate (G6P)
1416527_at	111	4.1e-05		alpha-tocopherol
1449396_at	282	4.24e-05		N-glycolylneuraminate
1420447_at	161	4.25e-05		docosahexaenoate (DHA; 22:6n3)
1449416_at	282	4.25e-05		N-glycolylneuraminate
1450884_at	371	4.41e-05		xanthine
1424030_at	127	4.46e-05		beta-sitosterol
1450883_a_at	371	4.46e-05		xanthine
1423166_at	371	4.64e-05		xanthine
1423797_at	180	4.68e-05		gamma-glutamylglutamate
1423607_at	117	4.76e-05		arginine
1421424_a_at	114	4.86e-05		arabitol
1418243_at	39	4.93e-05		1-stearoylglycerol (1-monostearin)
1451512_s_at	358	5.36e-05		trans-urocanate
1416558_at	154	5.4e-05		cytidine-5'-diphosphoethanolamine
1417347_at	364	5.59e-05		urea
1427516_a_at	140	5.77e-05		choline
1422677_at	100	5.8e-05		adenosine 5'diphosphoribose
1418194_at	114	5.84e-05		arabitol
1418393_a_at	166	5.89e-05		equol sulfate
1452251_at	137	5.96e-05		chiro-inositol
1450883_a_at	190	6.03e-05		glucose-6-phosphate (G6P)
1449145_a_at	282	6.06e-05		N-glycolylneuraminate
1449038_at	225	6.11e-05		inositol 1-phosphate (I1P)
1420370_s_at	177	6.14e-05		galactose
1448251_at	282	6.17e-05		N-glycolylneuraminate
1419762_at	321	6.19e-05		pseudouridine
1452348_s_at	118	6.27e-05		ascorbate (Vitamin C)
1448649_at	299	6.44e-05		pelargonate (9:0)
1422605_at	274	6.45e-05		N-acetyl-aspartyl-glutamate (NAAG)
1424008_a_at	362	6.53e-05		uracil
1421766_at	282	6.58e-05		N-glycolylneuraminate
1451527_at	283	6.63e-05		nicotinamide
1416776_at	151	6.7e-05		cytidine 5'-diphosphocholine
1422211_a_at	103	6.71e-05		AICA ribonucleotide
1420654_a_at	257	6.76e-05		mannose-6-phosphate
1449038_at	100	6.87e-05		adenosine 5'diphosphoribose
1426235_a_at	152	7.01e-05		cytidine 5'-monophosphate (5'-CMP)
1420032_at	154	7.02e-05		cytidine-5'-diphosphoethanolamine
1449154_at	28	7.18e-05		1-oleoylglycerophosphoethanolamine
1426571_at	137	7.2e-05		chiro-inositol
1416629_at	34	7.28e-05		1-palmitoylglycerol (1-monopalmitin)
1417851_at	182	7.28e-05		gamma-glutamylleucine
1425961_at	259	7.3e-05		mead acid (20:3n9)
1450884_at	351	7.35e-05		threonine
1421681_at	290	7.4e-05		ornithine
1418317_at	103	7.56e-05		AICA ribonucleotide
1438261_at	68	7.57e-05		2-oleoylglycerophosphoserine*
1450884_at	357	7.58e-05		trans-4-hydroxyproline
1416639_at	311	7.69e-05		phosphate
1419495_at	38	7.97e-05		1-palmitoylplasmenylethanolamine*
1449319_at	31	8.07e-05		1-oleoylglycerophosphoserine
1418897_at	333	8.15e-05		serylleucine
1450884_at	104	8.16e-05		alanine
1423797_at	201	8.26e-05		glycerophosphorylcholine (GPC)
1416992_at	225	8.31e-05		inositol 1-phosphate (I1P)
1417450_a_at	374	8.36e-05		xylulose
1456437_x_at	20	8.38e-05		1-linoleoylglycerol (1-monolinolein)
1450883_a_at	174	8.46e-05		fructose-6-phosphate
1451371_at	100	8.49e-05		adenosine 5'diphosphoribose
1417358_s_at	201	8.6e-05		glycerophosphorylcholine (GPC)
1416623_at	178	8.62e-05		gamma-aminobutyrate (GABA)
1422016_a_at	132	8.64e-05		caprate (10:0)
1451512_s_at	174	8.7e-05		fructose-6-phosphate
1451527_at	364	8.72e-05		urea
1449184_at	16	8.76e-05		1-eicosatrienoylglycerophosphoethanolamine*
1418835_at	68	9.08e-05		2-oleoylglycerophosphoserine*
1417347_at	201	9.09e-05		glycerophosphorylcholine (GPC)
1419475_a_at	127	9.1e-05		beta-sitosterol
1420655_at	364	9.11e-05		urea
1451322_at	316	9.12e-05		proline
1422293_a_at	18	9.2e-05		1-hexadecanol
1420654_a_at	119	9.21e-05		asparagine
1460693_a_at	299	9.22e-05		pelargonate (9:0)
1424357_at	136	9.24e-05		C-glycosyltryptophan*
1418673_at	157	9.3e-05		dihomo-linoleate (20:2n6)
1418652_at	125	9.32e-05		beta-alanine
1426225_at	225	9.44e-05		inositol 1-phosphate (I1P)
1449218_at	234	9.47e-05		isoleucylthreonine
1415894_at	116	9.6e-05		arachidonate (20:4n6)
1422602_a_at	357	9.67e-05		trans-4-hydroxyproline
1449568_at	179	9.75e-05		gamma-glutamylalanine
1450344_a_at	71	9.81e-05		2-palmitoylglycerophosphoethanolamine*
1451407_at	114	9.93e-05		arabitol
1452349_x_at	178	9.97e-05		gamma-aminobutyrate (GABA)
1417741_at	239	0.000100183		laurate (12:0)
1449568_at	184	0.000100307		gamma-glutamylphenylalanine
1416933_at	111	0.000100895		alpha-tocopherol
1417178_at	18	0.000101893		1-hexadecanol
1420747_at	185	0.000101976		gamma-glutamylthreonine*
1418652_at	325	0.00010212		riboflavin (Vitamin B2)
1453089_at	75	0.000102155		3'-dephosphocoenzyme A
1426134_at	229	0.000102363		isobutyrylcarnitine
1436737_a_at	364	0.000102426		urea
1449568_at	88	0.000102804		5-oxoproline
1418782_at	160	0.000105767		dimethylarginine (SDMA + ADMA)
1418849_x_at	31	0.000106081		1-oleoylglycerophosphoserine
1418804_at	290	0.000106357		ornithine
1451375_at	111	0.000106639		alpha-tocopherol
1422606_at	65	0.000109781		2-oleoylglycerophosphocholine*
1435870_at	212	0.000110528		hippurate
1417404_at	60	0.000112328		2-hydroxystearate
1427345_a_at	39	0.00011425		1-stearoylglycerol (1-monostearin)
1450131_a_at	197	0.00011477		glycerate
1452231_x_at	178	0.000114911		gamma-aminobutyrate (GABA)
1449130_at	356	0.000115296		thymine
1424187_at	18	0.000116723		1-hexadecanol
1418243_at	11	0.000117246		1-arachidonoylglycerophosphoinositol*
1450639_at	191	0.000117339		glutamate
1452348_s_at	178	0.000117626		gamma-aminobutyrate (GABA)
1450639_at	360	0.000117785		tyrosine
1417741_at	362	0.000117923		uracil
1451241_at	277	0.000118252		N-acetylneuraminate
1451322_at	170	0.000118841		erythronate*
1431824_at	49	0.00011888		2'-deoxyadenosine 3'-monophosphate
1418243_at	304	0.000119092		phenylacetylglycine
1426620_at	28	0.000120547		1-oleoylglycerophosphoethanolamine
1416992_at	131	0.000120598		campesterol
1418003_at	358	0.00012063		trans-urocanate
1424357_at	119	0.000120647		asparagine
1416239_at	161	0.000122825		docosahexaenoate (DHA; 22:6n3)
1426218_at	275	0.000122856		N-acetylglucosamine 6-phosphate
1449218_at	106	0.000123835		alanylleucine
1425400_a_at	68	0.000123979		2-oleoylglycerophosphoserine*
1448136_at	116	0.000124297		arachidonate (20:4n6)
1427183_at	275	0.00012447		N-acetylglucosamine 6-phosphate
1419124_at	61	0.000125128		2-linoleoylglycerol (2-monolinolein)
1421156_a_at	28	0.000125984		1-oleoylglycerophosphoethanolamine
1421038_a_at	66	0.000127808		2-oleoylglycerophosphoethanolamine*
1438082_at	299	0.00012844		pelargonate (9:0)
1428788_at	114	0.000128542		arabitol
1426869_at	179	0.000129008		gamma-glutamylalanine
1449568_at	187	0.000129169		gamma-glutamyltyrosine
1425416_s_at	225	0.000129367		inositol 1-phosphate (I1P)
1420054_s_at	163	0.000129498		docosapentaenoate (n6 DPA; 22:5n6)
1423797_at	324	0.000129807		ribitol
1425837_a_at	85	0.00013035		5-methyltetrahydrofolate (5MeTHF)
1419474_a_at	111	0.000130611		alpha-tocopherol
1455431_at	259	0.00013201		mead acid (20:3n9)
1423614_at	163	0.000132512		docosapentaenoate (n6 DPA; 22:5n6)
1420712_a_at	65	0.000133091		2-oleoylglycerophosphocholine*
1425826_a_at	201	0.000133513		glycerophosphorylcholine (GPC)
1426906_at	182	0.000135376		gamma-glutamylleucine
1418393_a_at	37	0.000135808		1-palmitoylglycerophosphoinositol*
1449466_at	95	0.000135933		Ac-Ser-Asp-Lys-Pro-OH
1420369_a_at	177	0.000136271		galactose
1417133_at	111	0.000136421		alpha-tocopherol
1424266_s_at	138	0.000138719		cholestanol
1419475_a_at	152	0.000138779		cytidine 5'-monophosphate (5'-CMP)
1449592_at	290	0.000139012		ornithine
1451322_at	11	0.000139288		1-arachidonoylglycerophosphoinositol*
1455901_at	170	0.000139434		erythronate*
1435943_at	36	0.000139814		1-palmitoylglycerophosphoethanolamine
1451054_at	95	0.000140149		Ac-Ser-Asp-Lys-Pro-OH
1422211_a_at	254	0.000140348		maltotriose
1426134_at	235	0.000140612		isovalerylcarnitine
1417129_a_at	20	0.000141438		1-linoleoylglycerol (1-monolinolein)
1448949_at	131	0.000141449		campesterol
1423166_at	174	0.00014253		fructose-6-phosphate
1424400_a_at	13	0.000143087		1-docosahexaenoylglycerophosphocholine (22:6n3)*
1424030_at	34	0.000143447		1-palmitoylglycerol (1-monopalmitin)
1418569_at	28	0.000143847		1-oleoylglycerophosphoethanolamine
1417273_at	114	0.000144115		arabitol
1452136_at	166	0.000145203		equol sulfate
1415802_at	28	0.000145971		1-oleoylglycerophosphoethanolamine
1420370_s_at	163	0.000146532		docosapentaenoate (n6 DPA; 22:5n6)
1451191_at	80	0.000146794		3-ureidopropionate
1425826_a_at	264	0.000147301		methylphosphate
1450639_at	359	0.000147473		tryptophan
1452511_at	17	0.000147539		1-eicosenoylglycerophosphocholine (20:1n9)*
1419144_at	275	0.000147744		N-acetylglucosamine 6-phosphate
1422605_at	171	0.00014807		ethanolamine
1448730_at	160	0.0001481		dimethylarginine (SDMA + ADMA)
1451698_at	225	0.000148566		inositol 1-phosphate (I1P)
1417645_at	161	0.000148603		docosahexaenoate (DHA; 22:6n3)
1423439_at	295	0.000150052		palmitoyl sphingomyelin
1425606_at	31	0.000150498		1-oleoylglycerophosphoserine
1436737_a_at	201	0.000150963		glycerophosphorylcholine (GPC)
1424308_at	42	0.00015129		1-stearoylglycerophosphoinositol
1451972_at	9	0.000151295		1-arachidonoylglycerophosphocholine (20:4n6)*
1419073_at	131	0.000151782		campesterol
1423084_at	364	0.000151873		urea
1423797_at	364	0.000152208		urea
1422678_at	230	0.000153147		isoleucine
1423166_at	190	0.000153197		glucose-6-phosphate (G6P)
1426571_at	85	0.000153521		5-methyltetrahydrofolate (5MeTHF)
1418341_at	313	0.000153649		phosphoethanolamine
1424186_at	18	0.000153981		1-hexadecanol
1420722_at	178	0.00015463		gamma-aminobutyrate (GABA)
1417404_at	373	0.00015553		xylitol
1426869_at	187	0.000155812		gamma-glutamyltyrosine
1417404_at	329	0.0001562		sarcosine (N-Methylglycine)
1421681_at	39	0.000156622		1-stearoylglycerol (1-monostearin)
1420683_at	61	0.000157746		2-linoleoylglycerol (2-monolinolein)
1424278_a_at	327	0.000158406		ribulose
1426278_at	64	0.000158596		2-methylbutyrylcarnitine (C5)
1425260_at	80	0.000159788		3-ureidopropionate
1449466_at	283	0.000160823		nicotinamide
1451511_at	373	0.000161639		xylitol
1424815_at	201	0.000161765		glycerophosphorylcholine (GPC)
1417639_at	283	0.000163271		nicotinamide
1424626_at	264	0.000165111		methylphosphate
1450060_at	116	0.00016589		arachidonate (20:4n6)
1455579_at	274	0.000166744		N-acetyl-aspartyl-glutamate (NAAG)
1417009_at	26	0.000166975		1-oleoylglycerol (1-monoolein)
1423614_at	177	0.000167116		galactose
1418697_at	139	0.000167836		cholesterol
1420654_a_at	45	0.000168014		2-aminoadipate
1437583_x_at	85	0.000168877		5-methyltetrahydrofolate (5MeTHF)
1417979_at	77	0.000169545		3-indoxyl sulfate
1452348_s_at	200	0.000169953		glycerol 3-phosphate (G3P)
1448919_at	18	0.000171649		1-hexadecanol
1420654_a_at	136	0.000172187		C-glycosyltryptophan*
1422678_at	100	0.000172544		adenosine 5'diphosphoribose
1422606_at	31	0.000172716		1-oleoylglycerophosphoserine
1425216_at	38	0.000174852		1-palmitoylplasmenylethanolamine*
1419755_at	158	0.000174944		dihomo-linolenate (20:3n3 or n6)
1456676_a_at	282	0.000175465		N-glycolylneuraminate
1418911_s_at	157	0.000176307		dihomo-linoleate (20:2n6)
1418706_at	277	0.000176947		N-acetylneuraminate
1418765_at	68	0.000177049		2-oleoylglycerophosphoserine*
1439018_at	282	0.00017761		N-glycolylneuraminate
1419721_at	95	0.000177691		Ac-Ser-Asp-Lys-Pro-OH
1425215_at	38	0.00017782		1-palmitoylplasmenylethanolamine*
1419073_at	39	0.000178513		1-stearoylglycerol (1-monostearin)
1419032_at	158	0.000178764		dihomo-linolenate (20:3n3 or n6)
1425216_at	279	0.000179455		N-acetylthreonine
1419136_at	332	0.000181466		serine
1427339_at	239	0.000181822		laurate (12:0)
1450884_at	176	0.000182115		fumarate
1422000_at	51	0.000182142		2'-deoxycytidine 3'-monophosphate
1424308_at	38	0.000182234		1-palmitoylplasmenylethanolamine*
1423489_at	225	0.000183544		inositol 1-phosphate (I1P)
1450883_a_at	257	0.000184038		mannose-6-phosphate
1451698_at	100	0.000184306		adenosine 5'diphosphoribose
1423890_x_at	23	0.000184907		1-linoleoylglycerophosphoinositol*
1460259_s_at	79	0.000185676		3-sialyllactose
1417639_at	9	0.000187216		1-arachidonoylglycerophosphocholine (20:4n6)*
1417858_at	102	0.000188268		adrenate (22:4n6)
1417884_at	137	0.000188795		chiro-inositol
1448925_at	65	0.000192692		2-oleoylglycerophosphocholine*
1423166_at	331	0.000193474		sedoheptulose-7-phosphate
1449388_at	168	0.000194196		erucate (22:1n9)
1417877_at	256	0.000194728		mannose
1451528_at	67	0.00019479		2-oleoylglycerophosphoinositol*
1425104_at	18	0.0001953		1-hexadecanol
1449130_at	335	0.000196451		sorbitol
1419474_a_at	152	0.000197146		cytidine 5'-monophosphate (5'-CMP)
1449141_at	28	0.000197858		1-oleoylglycerophosphoethanolamine
1449456_a_at	325	0.000197993		riboflavin (Vitamin B2)
1450884_at	362	0.000198462		uracil
1418369_at	132	0.000199001		caprate (10:0)
1426869_at	186	0.000199106		gamma-glutamyltryptophan
1450995_at	147	0.000200007		cysteine
1437171_x_at	34	0.000200219		1-palmitoylglycerol (1-monopalmitin)
1436991_x_at	34	0.000200594		1-palmitoylglycerol (1-monopalmitin)
1423714_at	132	0.000200767		caprate (10:0)
1427183_at	9	0.000200872		1-arachidonoylglycerophosphocholine (20:4n6)*
1417588_at	158	0.000201602		dihomo-linolenate (20:3n3 or n6)
1423477_at	141	0.000202118		choline phosphate
1418872_at	116	0.000202546		arachidonate (20:4n6)
1450639_at	202	0.000202965		glycine
1424367_a_at	148	0.000203653		cysteine-glutathione disulfide
1455901_at	237	0.000205084		lactate
1426620_at	37	0.000205262		1-palmitoylglycerophosphoinositol*
1437644_at	127	0.000205487		beta-sitosterol
1451537_at	238	0.000205499		lactose
1460693_a_at	100	0.000205596		adenosine 5'diphosphoribose
1419314_at	272	0.000205944		N-acetylalanine
1425597_a_at	259	0.000205966		mead acid (20:3n9)
1456340_at	183	0.00020617		gamma-glutamylmethionine
1426911_at	114	0.000206653		arabitol
1415994_at	100	0.000207186		adenosine 5'diphosphoribose
1452161_at	186	0.000208721		gamma-glutamyltryptophan
1448925_at	71	0.000209211		2-palmitoylglycerophosphoethanolamine*
1417574_at	299	0.000210026		pelargonate (9:0)
1420664_s_at	31	0.000210087		1-oleoylglycerophosphoserine
1417639_at	276	0.000210866		N-acetylmethionine
1420444_at	41	0.000210891		1-stearoylglycerophosphoethanolamine
1419073_at	290	0.000211353		ornithine
1421002_at	13	0.000211885		1-docosahexaenoylglycerophosphocholine (22:6n3)*
1424404_at	171	0.000212302		ethanolamine
1421921_at	173	0.000213848		fructose
1419549_at	114	0.000214871		arabitol
1418486_at	335	0.000215051		sorbitol
1417347_at	324	0.000215501		ribitol
1423911_at	290	0.000215607		ornithine
1425826_a_at	364	0.000216036		urea
1417346_at	111	0.00021683		alpha-tocopherol
1417347_at	180	0.000218359		gamma-glutamylglutamate
1424357_at	160	0.000219162		dimethylarginine (SDMA + ADMA)
1426231_at	177	0.000220375		galactose
1427345_a_at	304	0.000221143		phenylacetylglycine
1451512_s_at	271	0.000222521		N6-acetyllysine
1448299_at	165	0.000225506		eicosenoate (20:1n9 or 11)
1420654_a_at	176	0.000225727		fumarate
1421596_s_at	132	0.000226267		caprate (10:0)
1426562_a_at	61	0.000227292		2-linoleoylglycerol (2-monolinolein)
1430306_a_at	111	0.000228425		alpha-tocopherol
1451972_at	199	0.000228676		glycerol 2-phosphate
1416808_at	18	0.000229798		1-hexadecanol
1424007_at	295	0.000230148		palmitoyl sphingomyelin
1450884_at	202	0.000230332		glycine
1437582_at	85	0.000231044		5-methyltetrahydrofolate (5MeTHF)
1423627_at	108	0.000231679		allantoin
1419314_at	96	0.000231788		adenine
1419549_at	152	0.000231825		cytidine 5'-monophosphate (5'-CMP)
1425215_at	32	0.000232105		1-oleoylplasmenylethanolamine*
1438694_at	274	0.000233675		N-acetyl-aspartyl-glutamate (NAAG)
1424815_at	199	0.000233836		glycerol 2-phosphate
1448842_at	31	0.00023426		1-oleoylglycerophosphoserine
1423439_at	191	0.0002346		glutamate
1416432_at	225	0.000234733		inositol 1-phosphate (I1P)
1448649_at	39	0.000235971		1-stearoylglycerol (1-monostearin)
1419073_at	100	0.000237294		adenosine 5'diphosphoribose
1456312_x_at	34	0.000238132		1-palmitoylglycerol (1-monopalmitin)
1451375_at	152	0.000240197		cytidine 5'-monophosphate (5'-CMP)
1424278_a_at	154	0.000240312		cytidine-5'-diphosphoethanolamine
1423489_at	131	0.000240705		campesterol
1424815_at	138	0.000241314		cholestanol
1423166_at	257	0.000242964		mannose-6-phosphate
1419498_at	227	0.000243494		Isobar: fructose 1,6-diphosphate, glucose 1,6-diphosphate, myo-inositol 1,4 or 1,3-diphosphate
1423281_at	85	0.000245018		5-methyltetrahydrofolate (5MeTHF)
1430306_a_at	116	0.00024531		arachidonate (20:4n6)
1417403_at	10	0.000245682		1-arachidonoylglycerophosphoethanolamine*
1417358_s_at	324	0.000245715		ribitol
1426236_a_at	152	0.000245778		cytidine 5'-monophosphate (5'-CMP)
1423619_at	225	0.000246455		inositol 1-phosphate (I1P)
1449038_at	131	0.000247452		campesterol
1419463_at	79	0.000247551		3-sialyllactose
1421681_at	42	0.000247948		1-stearoylglycerophosphoinositol
1419136_at	45	0.000248992		2-aminoadipate
1451371_at	225	0.000249503		inositol 1-phosphate (I1P)
1432392_at	49	0.000249769		2'-deoxyadenosine 3'-monophosphate
1439436_x_at	374	0.000251201		xylulose
1448250_at	225	0.00025125		inositol 1-phosphate (I1P)
1416623_at	125	0.000252951		beta-alanine
1424815_at	173	0.000253508		fructose
1418848_at	65	0.000254579		2-oleoylglycerophosphocholine*
1422677_at	230	0.000254894		isoleucine
1420654_a_at	359	0.000255118		tryptophan
1418804_at	42	0.000255223		1-stearoylglycerophosphoinositol
1450658_at	26	0.000256508		1-oleoylglycerol (1-monoolein)
1418697_at	316	0.000257183		proline
1449466_at	180	0.000257564		gamma-glutamylglutamate
1448859_at	365	0.00025775		uridine
1415994_at	290	0.000258326		ornithine
1427339_at	212	0.00025871		hippurate
1424367_a_at	12	0.000259202		1-dihomo-linoleoylglycerophosphocholine (20:2n6)*
1448842_at	65	0.000259335		2-oleoylglycerophosphocholine*
1423877_at	132	0.000259594		caprate (10:0)
1434981_at	103	0.000259725		AICA ribonucleotide
1424815_at	283	0.000261387		nicotinamide
1450639_at	368	0.000261614		valine
1427213_at	34	0.000261826		1-palmitoylglycerol (1-monopalmitin)
1426231_at	163	0.000262043		docosapentaenoate (n6 DPA; 22:5n6)
1422677_at	290	0.000263292		ornithine
1426045_at	92	0.000264076		9,10-DiHOME
1452251_at	85	0.000264473		5-methyltetrahydrofolate (5MeTHF)
1417741_at	237	0.000265931		lactate
1423797_at	283	0.000266226		nicotinamide
1422602_a_at	271	0.00026649		N6-acetyllysine
1427545_at	26	0.000267501		1-oleoylglycerol (1-monoolein)
1416933_at	102	0.000267863		adrenate (22:4n6)
1420032_at	327	0.000269514		ribulose
1423271_at	280	0.000270133		N-delta-acetylornithine*
1452349_x_at	200	0.000270856		glycerol 3-phosphate (G3P)
1420655_at	201	0.000271441		glycerophosphorylcholine (GPC)
1436737_a_at	180	0.00027184		gamma-glutamylglutamate
1450639_at	139	0.000272486		cholesterol
1417741_at	104	0.000273415		alanine
1437644_at	111	0.000273977		alpha-tocopherol
1438511_a_at	176	0.000274934		fumarate
1420722_at	182	0.000275012		gamma-glutamylleucine
1417863_at	31	0.000275234		1-oleoylglycerophosphoserine
1451322_at	362	0.00027535		uracil
1452919_a_at	66	0.000275395		2-oleoylglycerophosphoethanolamine*
1420369_a_at	163	0.000276502		docosapentaenoate (n6 DPA; 22:5n6)
1435870_at	302	0.00027669		phenol sulfate
1416639_at	139	0.000277897		cholesterol
1424815_at	264	0.000278207		methylphosphate
1419301_at	18	0.000278961		1-hexadecanol
1416630_at	68	0.000279563		2-oleoylglycerophosphoserine*
1455579_at	171	0.000280564		ethanolamine
1418243_at	131	0.00028119		campesterol
1422678_at	131	0.000282671		campesterol
1423166_at	104	0.000282829		alanine
1452240_at	254	0.000283649		maltotriose
1417404_at	10	0.000283831		1-arachidonoylglycerophosphoethanolamine*
1417074_at	137	0.000284327		chiro-inositol
1438842_at	289	0.000286036		ophthalmate
1418281_at	49	0.000286215		2'-deoxyadenosine 3'-monophosphate
1424524_at	34	0.000286248		1-palmitoylglycerol (1-monopalmitin)
1451786_at	152	0.000288478		cytidine 5'-monophosphate (5'-CMP)
1418652_at	332	0.000288669		serine
1417680_at	18	0.000288685		1-hexadecanol
1451940_x_at	229	0.000289605		isobutyrylcarnitine
1420981_a_at	137	0.000289719		chiro-inositol
1420673_a_at	67	0.000291161		2-oleoylglycerophosphoinositol*
1422678_at	139	0.000291232		cholesterol
1419555_at	147	0.00029124		cysteine
1426225_at	290	0.000292034		ornithine
1418496_at	18	0.000292588		1-hexadecanol
1451972_at	138	0.000292936		cholestanol
1455531_at	68	0.000296236		2-oleoylglycerophosphoserine*
1423488_at	39	0.000300888		1-stearoylglycerol (1-monostearin)
1424985_a_at	34	0.00030114		1-palmitoylglycerol (1-monopalmitin)
1417933_at	225	0.000301433		inositol 1-phosphate (I1P)
1416639_at	260	0.000302161		methionine
1425216_at	237	0.000303029		lactate
1438953_at	299	0.000303391		pelargonate (9:0)
1421681_at	299	0.000303752		pelargonate (9:0)
1436170_a_at	274	0.000304077		N-acetyl-aspartyl-glutamate (NAAG)
1427517_at	146	0.000304389		cys-gly, oxidized
1424439_at	168	0.000304705		erucate (22:1n9)
1420664_s_at	65	0.000304774		2-oleoylglycerophosphocholine*
1418500_at	148	0.000304908		cysteine-glutathione disulfide
1436737_a_at	324	0.00030625		ribitol
1424266_s_at	199	0.00030635		glycerol 2-phosphate
1419301_at	282	0.000306518		N-glycolylneuraminate
1451972_at	275	0.000309015		N-acetylglucosamine 6-phosphate
1450639_at	240	0.000309661		leucine
1418897_at	106	0.00031039		alanylleucine
1449244_at	238	0.000310543		lactose
1434079_s_at	132	0.000310662		caprate (10:0)
1450884_at	331	0.000311234		sedoheptulose-7-phosphate
1419136_at	305	0.000311555		phenylalanine
1425108_a_at	166	0.000311906		equol sulfate
1418940_at	152	0.000312257		cytidine 5'-monophosphate (5'-CMP)
1423166_at	357	0.000313175		trans-4-hydroxyproline
1417574_at	290	0.000314933		ornithine
1427403_at	158	0.000316748		dihomo-linolenate (20:3n3 or n6)
1451527_at	264	0.000317065		methylphosphate
1439373_x_at	271	0.00031762		N6-acetyllysine
1451375_at	127	0.000317707		beta-sitosterol
1417589_at	28	0.000320991		1-oleoylglycerophosphoethanolamine
1437313_x_at	132	0.000322473		caprate (10:0)
1450883_a_at	357	0.000322728		trans-4-hydroxyproline
1460416_s_at	163	0.000323429		docosapentaenoate (n6 DPA; 22:5n6)
1418352_at	108	0.000323475		allantoin
1418897_at	242	0.000323697		leucylglutamate
1425215_at	279	0.000324252		N-acetylthreonine
1417741_at	316	0.000325468		proline
1417639_at	199	0.000326045		glycerol 2-phosphate
1428443_a_at	158	0.00032741		dihomo-linolenate (20:3n3 or n6)
1423250_a_at	137	0.000329273		chiro-inositol
1423500_a_at	27	0.000330195		1-oleoylglycerophosphocholine (18:1)
1427345_a_at	299	0.000330272		pelargonate (9:0)
1418697_at	362	0.000330451		uracil
1423439_at	230	0.000330728		isoleucine
1421002_at	304	0.000331157		phenylacetylglycine
1448859_at	188	0.000332987		gamma-glutamylvaline
1449207_a_at	132	0.000333651		caprate (10:0)
1450658_at	36	0.00033389		1-palmitoylglycerophosphoethanolamine
1422561_at	36	0.000335427		1-palmitoylglycerophosphoethanolamine
1416321_s_at	172	0.000335949		flavin adenine dinucleotide (FAD)
1417741_at	279	0.000337359		N-acetylthreonine
1421596_s_at	49	0.000337628		2'-deoxyadenosine 3'-monophosphate
1425108_a_at	37	0.000338122		1-palmitoylglycerophosphoinositol*
1451512_s_at	121	0.000339077		aspartate
1418897_at	194	0.000339958		glutamine-leucine
1417858_at	127	0.000340632		beta-sitosterol
1449466_at	9	0.000340874		1-arachidonoylglycerophosphocholine (20:4n6)*
1426708_at	282	0.000341454		N-glycolylneuraminate
1424439_at	215	0.000341467		homocysteine
1452592_at	116	0.000342611		arachidonate (20:4n6)
1418412_at	67	0.000342689		2-oleoylglycerophosphoinositol*
1426708_at	18	0.00034294		1-hexadecanol
1427082_at	147	0.000343121		cysteine
1420655_at	324	0.000344038		ribitol
1449456_a_at	264	0.000344184		methylphosphate
1423276_at	61	0.00034459		2-linoleoylglycerol (2-monolinolein)
1421564_at	311	0.000344848		phosphate
1452136_at	66	0.000346459		2-oleoylglycerophosphoethanolamine*
1438511_a_at	271	0.00034709		N6-acetyllysine
1422678_at	191	0.0003471		glutamate
1416527_at	127	0.000348545		beta-sitosterol
1423084_at	201	0.000349371		glycerophosphorylcholine (GPC)
1450884_at	48	0.000350846		2-arachidonoylglycerophosphoethanolamine*
1438694_at	171	0.000350903		ethanolamine
1420633_a_at	274	0.000352244		N-acetyl-aspartyl-glutamate (NAAG)
1454159_a_at	235	0.000352272		isovalerylcarnitine
1424357_at	190	0.000352407		glucose-6-phosphate (G6P)
1417129_a_at	26	0.000353131		1-oleoylglycerol (1-monoolein)
1451424_at	117	0.000353225		arginine
1451527_at	199	0.000355202		glycerol 2-phosphate
1417346_at	364	0.000355366		urea
1448852_at	16	0.000356267		1-eicosatrienoylglycerophosphoethanolamine*
1426225_at	131	0.000357064		campesterol
1424308_at	39	0.000357165		1-stearoylglycerol (1-monostearin)
1423858_a_at	18	0.000358905		1-hexadecanol
1427183_at	199	0.000359001		glycerol 2-phosphate
1416664_at	327	0.000359683		ribulose
1418766_s_at	68	0.000360285		2-oleoylglycerophosphoserine*
1421564_at	139	0.000360777		cholesterol
1419314_at	271	0.00036111		N6-acetyllysine
1417389_at	159	0.000361351		dihydroxyacetone phosphate (DHAP)
1416992_at	100	0.000362655		adenosine 5'diphosphoribose
1455901_at	279	0.000362902		N-acetylthreonine
1452160_at	181	0.000362926		gamma-glutamylisoleucine*
1424063_at	1	0.000363138		1,5-anhydroglucitol (1,5-AG)
1419136_at	240	0.000363564		leucine
1456437_x_at	26	0.000363689		1-oleoylglycerol (1-monoolein)
1422141_s_at	177	0.000364329		galactose
1425606_at	61	0.000365065		2-linoleoylglycerol (2-monolinolein)
1455901_at	302	0.000365632		phenol sulfate
1424008_a_at	279	0.000365921		N-acetylthreonine
1449534_at	108	0.000365953		allantoin
1417358_s_at	180	0.000366131		gamma-glutamylglutamate
1416710_at	156	0.000367064		deoxycarnitine
1417236_at	198	0.000367394		glycerol
1435945_a_at	166	0.000367722		equol sulfate
1438511_a_at	121	0.000368144		aspartate
1424815_at	71	0.000369587		2-palmitoylglycerophosphoethanolamine*
1420444_at	216	0.000370326		homoserine
1423084_at	111	0.000371269		alpha-tocopherol
1419475_a_at	111	0.000371808		alpha-tocopherol
1423305_at	163	0.000372003		docosapentaenoate (n6 DPA; 22:5n6)
1425558_at	20	0.000374432		1-linoleoylglycerol (1-monolinolein)
1424357_at	45	0.000375201		2-aminoadipate
1426243_at	114	0.000376466		arabitol
1460715_x_at	218	0.000376626		hydroxybutyrylcarnitine*
1417404_at	86	0.000377135		5-methylthioadenosine (MTA)
1424008_a_at	202	0.000377274		glycine
1451320_at	161	0.00037753		docosahexaenoate (DHA; 22:6n3)
1450884_at	271	0.000377649		N6-acetyllysine
1418697_at	39	0.0003778		1-stearoylglycerol (1-monostearin)
1425826_a_at	71	0.000377945		2-palmitoylglycerophosphoethanolamine*
1420655_at	180	0.000378781		gamma-glutamylglutamate
1426867_at	326	0.000378806		ribose
1418003_at	121	0.000380382		aspartate
1424357_at	257	0.000380603		mannose-6-phosphate
1438511_a_at	190	0.000380731		glucose-6-phosphate (G6P)
1421093_at	299	0.000380879		pelargonate (9:0)
1417403_at	373	0.000384567		xylitol
1435870_at	134	0.000385555		carnosine
1417851_at	188	0.000386265		gamma-glutamylvaline
1417757_at	137	0.000386353		chiro-inositol
1417403_at	329	0.000386681		sarcosine (N-Methylglycine)
1452349_x_at	118	0.000387843		ascorbate (Vitamin C)
1450639_at	305	0.000388019		phenylalanine
1452161_at	187	0.00038806		gamma-glutamyltyrosine
1426906_at	178	0.000388703		gamma-aminobutyrate (GABA)
1415812_at	34	0.000388733		1-palmitoylglycerol (1-monopalmitin)
1426634_at	68	0.000389887		2-oleoylglycerophosphoserine*
1460416_s_at	177	0.000390137		galactose
1417403_at	60	0.000391046		2-hydroxystearate
1425784_a_at	114	0.000391153		arabitol
1424008_a_at	357	0.000391264		trans-4-hydroxyproline
1425826_a_at	324	0.000391891		ribitol
1418304_at	259	0.000392568		mead acid (20:3n9)
1417911_at	154	0.000396168		cytidine-5'-diphosphoethanolamine
1456312_x_at	171	0.000396626		ethanolamine
1460693_a_at	39	0.00039884		1-stearoylglycerol (1-monostearin)
1419474_a_at	127	0.00039983		beta-sitosterol
1425581_s_at	68	0.00040032		2-oleoylglycerophosphoserine*
1423166_at	48	0.000401791		2-arachidonoylglycerophosphoethanolamine*
1450883_a_at	331	0.000402741		sedoheptulose-7-phosphate
1417073_a_at	259	0.000403209		mead acid (20:3n9)
1448443_at	1	0.000404598		1,5-anhydroglucitol (1,5-AG)
1448529_at	282	0.000405477		N-glycolylneuraminate
1418094_s_at	131	0.000405614		campesterol
1425559_a_at	1	0.000406569		1,5-anhydroglucitol (1,5-AG)
1436991_x_at	171	0.000406886		ethanolamine
1417765_a_at	255	0.000409039		mannitol
1428079_at	51	0.000409664		2'-deoxycytidine 3'-monophosphate
1449984_at	116	0.000411981		arachidonate (20:4n6)
1418195_at	114	0.000412467		arabitol
1450883_a_at	271	0.000413672		N6-acetyllysine
1449048_s_at	313	0.000413867		phosphoethanolamine
1420654_a_at	351	0.00041402		threonine
1449061_a_at	154	0.000415474		cytidine-5'-diphosphoethanolamine
1422605_at	284	0.000415553		nicotinamide adenine dinucleotide (NAD+)
1417872_at	225	0.000416126		inositol 1-phosphate (I1P)
1416617_at	85	0.000416768		5-methyltetrahydrofolate (5MeTHF)
1423506_a_at	275	0.000417072		N-acetylglucosamine 6-phosphate
1451689_a_at	34	0.000420476		1-palmitoylglycerol (1-monopalmitin)
1415945_at	374	0.000421558		xylulose
1421564_at	138	0.000422818		cholestanol
1451511_at	86	0.000423453		5-methylthioadenosine (MTA)
1452160_at	186	0.000423658		gamma-glutamyltryptophan
1423166_at	202	0.000424008		glycine
1419758_at	172	0.00042447		flavin adenine dinucleotide (FAD)
1418094_s_at	71	0.000426728		2-palmitoylglycerophosphoethanolamine*
1422677_at	131	0.000427823		campesterol
1455579_at	284	0.000429307		nicotinamide adenine dinucleotide (NAD+)
1419057_at	259	0.000429326		mead acid (20:3n9)
1423488_at	299	0.000429469		pelargonate (9:0)
1422826_at	17	0.000429939		1-eicosenoylglycerophosphocholine (20:1n9)*
1448254_at	161	0.000431909		docosahexaenoate (DHA; 22:6n3)
1450757_at	286	0.000432357		nonadecanoate (19:0)
1423488_at	304	0.000433377		phenylacetylglycine
1450884_at	174	0.00043439		fructose-6-phosphate
1448925_at	31	0.000434639		1-oleoylglycerophosphoserine
1450883_a_at	202	0.00043477		glycine
1423866_at	9	0.000435409		1-arachidonoylglycerophosphocholine (20:4n6)*
1452031_at	275	0.000437129		N-acetylglucosamine 6-phosphate
1422552_at	238	0.000438055		lactose
1416158_at	213	0.000438289		histamine
1437644_at	102	0.000438373		adrenate (22:4n6)
1426142_a_at	229	0.000439125		isobutyrylcarnitine
1418320_at	68	0.00043955		2-oleoylglycerophosphoserine*
1449036_at	183	0.00044076		gamma-glutamylmethionine
1416527_at	152	0.000441281		cytidine 5'-monophosphate (5'-CMP)
1418940_at	65	0.00044142		2-oleoylglycerophosphocholine*
1452231_x_at	182	0.000442084		gamma-glutamylleucine
1418734_at	292	0.000442144		palmitate (16:0)
1452031_at	34	0.000443381		1-palmitoylglycerol (1-monopalmitin)
1450658_at	31	0.000443535		1-oleoylglycerophosphoserine
1419504_at	275	0.000444304		N-acetylglucosamine 6-phosphate
1437171_x_at	171	0.000444951		ethanolamine
1424815_at	324	0.000445518		ribitol
1426562_a_at	114	0.000446273		arabitol
1415812_at	171	0.000447266		ethanolamine
1419073_at	299	0.000448304		pelargonate (9:0)
1427247_at	140	0.000448525		choline
1423797_at	199	0.000448611		glycerol 2-phosphate
1424266_s_at	71	0.000448822		2-palmitoylglycerophosphoethanolamine*
1422141_s_at	163	0.00044885		docosapentaenoate (n6 DPA; 22:5n6)
1424401_at	80	0.000451173		3-ureidopropionate
1424722_at	266	0.00045131		myristate (14:0)
1418481_at	103	0.000451509		AICA ribonucleotide
1420654_a_at	360	0.000452478		tyrosine
1418094_s_at	138	0.000452655		cholestanol
1451407_at	152	0.000452694		cytidine 5'-monophosphate (5'-CMP)
1418400_at	68	0.000452838		2-oleoylglycerophosphoserine*
1420852_a_at	189	0.000453112		glucose
1427345_a_at	13	0.000454088		1-docosahexaenoylglycerophosphocholine (22:6n3)*
1417639_at	311	0.000454504		phosphate
1437902_s_at	274	0.000454548		N-acetyl-aspartyl-glutamate (NAAG)
1423166_at	271	0.000455182		N6-acetyllysine
1417346_at	71	0.000455396		2-palmitoylglycerophosphoethanolamine*
1418804_at	39	0.000456601		1-stearoylglycerol (1-monostearin)
1418003_at	174	0.000456666		fructose-6-phosphate
1418094_s_at	304	0.000457919		phenylacetylglycine
1451786_at	102	0.000458378		adrenate (22:4n6)
1419073_at	11	0.000458868		1-arachidonoylglycerophosphoinositol*
1449416_at	18	0.00045925		1-hexadecanol
1418983_at	225	0.000459621		inositol 1-phosphate (I1P)
1424647_at	117	0.000460001		arginine
1427749_at	28	0.000460223		1-oleoylglycerophosphoethanolamine
1419073_at	225	0.00046268		inositol 1-phosphate (I1P)
1424400_a_at	39	0.000463874		1-stearoylglycerol (1-monostearin)
1451371_at	290	0.000464273		ornithine
1422029_at	133	0.000467202		carnitine
1421564_at	199	0.000468409		glycerol 2-phosphate
1416933_at	65	0.000469975		2-oleoylglycerophosphocholine*
1448949_at	225	0.000470326		inositol 1-phosphate (I1P)
1418926_at	183	0.000471069		gamma-glutamylmethionine
1417702_a_at	356	0.000471434		thymine
1427167_at	297	0.000472208		pantothenate
1427213_at	71	0.000472683		2-palmitoylglycerophosphoethanolamine*
1424266_s_at	9	0.000473796		1-arachidonoylglycerophosphocholine (20:4n6)*
1427284_a_at	147	0.000474141		cysteine
1418697_at	260	0.00047624		methionine
1424815_at	180	0.000476266		gamma-glutamylglutamate
1450883_a_at	104	0.000476379		alanine
1453677_a_at	66	0.000476433		2-oleoylglycerophosphoethanolamine*
1420444_at	329	0.000477632		sarcosine (N-Methylglycine)
1448949_at	304	0.000477801		phenylacetylglycine
1456629_at	36	0.000478801		1-palmitoylglycerophosphoethanolamine
1450884_at	260	0.000478805		methionine
1425558_at	61	0.000478883		2-linoleoylglycerol (2-monolinolein)
1424113_at	277	0.000479041		N-acetylneuraminate
1438694_at	284	0.000479147		nicotinamide adenine dinucleotide (NAD+)
1428538_s_at	284	0.000480528		nicotinamide adenine dinucleotide (NAD+)
1420747_at	365	0.000480731		uridine
1419136_at	368	0.000480751		valine
1423166_at	94	0.000481017		acetylphosphate
1419314_at	357	0.000481372		trans-4-hydroxyproline
1418697_at	202	0.000481958		glycine
1424008_a_at	11	0.00048208		1-arachidonoylglycerophosphoinositol*
1448995_at	304	0.00048222		phenylacetylglycine
1434981_at	254	0.000482896		maltotriose
1418940_at	31	0.000483712		1-oleoylglycerophosphoserine
1424400_a_at	299	0.000486023		pelargonate (9:0)
1417273_at	166	0.0004866		equol sulfate
1421002_at	38	0.000486853		1-palmitoylplasmenylethanolamine*
1424357_at	359	0.000487047		tryptophan
1417765_a_at	225	0.00048751		inositol 1-phosphate (I1P)
1426278_at	235	0.000487976		isovalerylcarnitine
1455901_at	316	0.000488137		proline
1424524_at	114	0.000488303		arabitol
1451469_at	156	0.000489118		deoxycarnitine
1417851_at	178	0.000489212		gamma-aminobutyrate (GABA)
1424400_a_at	304	0.000489654		phenylacetylglycine
1418848_at	71	0.000489893		2-palmitoylglycerophosphoethanolamine*
1421038_a_at	166	0.00049027		equol sulfate
1418835_at	66	0.000490581		2-oleoylglycerophosphoethanolamine*
1427339_at	237	0.000491425		lactate
1418157_at	341	0.000492879		stearate (18:0)
1419373_at	163	0.000493332		docosapentaenoate (n6 DPA; 22:5n6)
1418281_at	154	0.000494986		cytidine-5'-diphosphoethanolamine
1422678_at	276	0.00049508		N-acetylmethionine
1421404_at	282	0.00049666		N-glycolylneuraminate
1420185_at	228	0.000496909		Isobar: ribulose 5-phosphate, xylulose 5-phosphate
1421681_at	11	0.000497804		1-arachidonoylglycerophosphoinositol*
1418815_at	238	0.000498035		lactose
1419136_at	257	0.000498563		mannose-6-phosphate
1422602_a_at	104	0.000501558		alanine
1424046_at	80	0.000501818		3-ureidopropionate
1426721_s_at	140	0.000502185		choline
1460714_at	218	0.000502602		hydroxybutyrylcarnitine*
1424008_a_at	237	0.000503104		lactate
1428538_s_at	171	0.000505064		ethanolamine
1450639_at	276	0.000506919		N-acetylmethionine
1450658_at	61	0.000507035		2-linoleoylglycerol (2-monolinolein)
1450923_at	163	0.000507193		docosapentaenoate (n6 DPA; 22:5n6)
1431805_a_at	147	0.000507736		cysteine
1423813_at	132	0.000508057		caprate (10:0)
1418697_at	170	0.000508322		erythronate*
1418697_at	173	0.00050905		fructose
1417649_at	26	0.000509308		1-oleoylglycerol (1-monoolein)
1423933_a_at	68	0.000509375		2-oleoylglycerophosphoserine*
1417178_at	282	0.000509774		N-glycolylneuraminate
1419549_at	34	0.000511253		1-palmitoylglycerol (1-monopalmitin)
1449218_at	194	0.00051133		glutamine-leucine
1421681_at	100	0.000511443		adenosine 5'diphosphoribose
1423280_at	85	0.000512009		5-methyltetrahydrofolate (5MeTHF)
1448859_at	185	0.000512215		gamma-glutamylthreonine*
1422677_at	191	0.000512604		glutamate
1420654_a_at	160	0.000513021		dimethylarginine (SDMA + ADMA)
1424626_at	173	0.000513428		fructose
1449104_at	80	0.000513673		3-ureidopropionate
1423866_at	283	0.000513674		nicotinamide
1451972_at	131	0.000513683		campesterol
1422602_a_at	239	0.000513783		laurate (12:0)
1426978_at	163	0.000514774		docosapentaenoate (n6 DPA; 22:5n6)
1438954_x_at	299	0.000515852		pelargonate (9:0)
1424626_at	175	0.000515859		fucose
1420654_a_at	240	0.000516873		leucine
1423506_a_at	225	0.000518295		inositol 1-phosphate (I1P)
1420664_s_at	34	0.000518526		1-palmitoylglycerol (1-monopalmitin)
1425145_at	186	0.000519434		gamma-glutamyltryptophan
1437644_at	364	0.000519472		urea
1422140_at	163	0.000520385		docosapentaenoate (n6 DPA; 22:5n6)
1426867_at	170	0.000521718		erythronate*
1449061_a_at	374	0.000522635		xylulose
1418848_at	304	0.000523757		phenylacetylglycine
1417133_at	116	0.000524311		arachidonate (20:4n6)
1417318_at	178	0.000524834		gamma-aminobutyrate (GABA)
1438852_x_at	289	0.000525198		ophthalmate
1417765_a_at	131	0.000526682		campesterol
1449466_at	199	0.000527768		glycerol 2-phosphate
1421381_a_at	198	0.000528838		glycerol
1448730_at	191	0.000529731		glutamate
1418848_at	326	0.000530123		ribose
1423439_at	100	0.000531184		adenosine 5'diphosphoribose
1449456_a_at	311	0.000532225		phosphate
1450884_at	190	0.000533944		glucose-6-phosphate (G6P)
1434437_x_at	80	0.000534507		3-ureidopropionate
1424815_at	9	0.000535927		1-arachidonoylglycerophosphocholine (20:4n6)*
1416160_at	47	0.000536323		2-arachidonoylglycerophosphocholine*
1424007_at	290	0.00053689		ornithine
1419762_at	192	0.000536922		glutamate, gamma-methyl ester
1450639_at	260	0.000537839		methionine
1452260_at	255	0.000539283		mannitol
1425145_at	181	0.000539542		gamma-glutamylisoleucine*
1420186_at	228	0.00053979		Isobar: ribulose 5-phosphate, xylulose 5-phosphate
1417649_at	36	0.000539896		1-palmitoylglycerophosphoethanolamine
1448823_at	41	0.00054084		1-stearoylglycerophosphoethanolamine
1429761_at	17	0.000541053		1-eicosenoylglycerophosphocholine (20:1n9)*
1415806_at	161	0.000542073		docosahexaenoate (DHA; 22:6n3)
1418897_at	122	0.000542474		aspartylleucine
1450974_at	299	0.000542651		pelargonate (9:0)
1420886_a_at	161	0.000543638		docosahexaenoate (DHA; 22:6n3)
1425144_at	313	0.000544826		phosphoethanolamine
1436170_a_at	171	0.000544939		ethanolamine
1453851_a_at	162	0.000545791		docosapentaenoate (n3 DPA; 22:5n3)
1448925_at	138	0.000546317		cholestanol
1460693_a_at	225	0.000546573		inositol 1-phosphate (I1P)
1426039_a_at	24	0.00054676		1-margaroylglycerophosphocholine (17:0)
1418320_at	66	0.000547064		2-oleoylglycerophosphoethanolamine*
1419495_at	335	0.000549574		sorbitol
1449388_at	116	0.000551237		arachidonate (20:4n6)
1449456_a_at	283	0.000551462		nicotinamide
1449555_a_at	267	0.000551756		myristoleate (14:1n5)
1448250_at	282	0.000553423		N-glycolylneuraminate
1420054_s_at	177	0.000553976		galactose
1452161_at	179	0.000554055		gamma-glutamylalanine
1452474_a_at	13	0.000554371		1-docosahexaenoylglycerophosphocholine (22:6n3)*
1425558_at	16	0.000555564		1-eicosatrienoylglycerophosphoethanolamine*
1427417_at	20	0.0005569		1-linoleoylglycerol (1-monolinolein)
1434484_at	276	0.000558146		N-acetylmethionine
1419394_s_at	222	0.000558468		indolelactate
1418197_at	332	0.000558496		serine
1418197_at	350	0.000560975		threonate
1425369_a_at	34	0.000561341		1-palmitoylglycerol (1-monopalmitin)
1450883_a_at	368	0.000561402		valine
1423488_at	225	0.000562736		inositol 1-phosphate (I1P)
1450883_a_at	48	0.0005637		2-arachidonoylglycerophosphoethanolamine*
1417741_at	357	0.000563707		trans-4-hydroxyproline
1451371_at	139	0.000564525		cholesterol
1419504_at	255	0.000564674		mannitol
1451322_at	237	0.000564831		lactate
1427213_at	111	0.000565438		alpha-tocopherol
1428538_s_at	274	0.00056566		N-acetyl-aspartyl-glutamate (NAAG)
1438511_a_at	351	0.000566424		threonine
1416978_at	282	0.000566723		N-glycolylneuraminate
1418697_at	304	0.000566745		phenylacetylglycine
1448842_at	71	0.000566763		2-palmitoylglycerophosphoethanolamine*
1448649_at	290	0.000567128		ornithine
1416933_at	152	0.000568253		cytidine 5'-monophosphate (5'-CMP)
1426929_at	254	0.000568445		maltotriose
1421058_at	166	0.00056846		equol sulfate
1449534_at	302	0.000568532		phenol sulfate
1451940_x_at	64	0.000569787		2-methylbutyrylcarnitine (C5)
1417358_s_at	264	0.000569912		methylphosphate
1451054_at	275	0.000570082		N-acetylglucosamine 6-phosphate
1419549_at	127	0.000570715		beta-sitosterol
1434484_at	214	0.000571867		histidine
1455796_x_at	114	0.000571988		arabitol
1438571_at	80	0.000572146		3-ureidopropionate
1424815_at	364	0.000572532		urea
1417863_at	282	0.000572553		N-glycolylneuraminate
1420654_a_at	368	0.000573034		valine
1449147_at	127	0.000573111		beta-sitosterol
1426155_a_at	168	0.000573257		erucate (22:1n9)
1449456_a_at	324	0.000574408		ribitol
1448995_at	65	0.000574426		2-oleoylglycerophosphocholine*
1420654_a_at	191	0.000574662		glutamate
1453677_a_at	68	0.000575366		2-oleoylglycerophosphoserine*
1423166_at	368	0.00057793		valine
1416802_a_at	154	0.000578826		cytidine-5'-diphosphoethanolamine
1450883_a_at	358	0.000580774		trans-urocanate
1448949_at	39	0.000581961		1-stearoylglycerol (1-monostearin)
1456312_x_at	284	0.000583177		nicotinamide adenine dinucleotide (NAD+)
1417639_at	180	0.000583506		gamma-glutamylglutamate
1416749_at	66	0.000583545		2-oleoylglycerophosphoethanolamine*
1421002_at	39	0.000584277		1-stearoylglycerol (1-monostearin)
1425793_a_at	69	0.000584402		2-palmitoylglycerol (2-monopalmitin)
1450639_at	371	0.000584807		xanthine
1455901_at	239	0.000584849		laurate (12:0)
1431382_a_at	189	0.000585618		glucose
1438511_a_at	251	0.000586824		lysine
1452349_x_at	125	0.000588367		beta-alanine
1420655_at	274	0.000588906		N-acetyl-aspartyl-glutamate (NAAG)
1424072_at	198	0.00058995		glycerol
1423084_at	71	0.000590434		2-palmitoylglycerophosphoethanolamine*
1448949_at	138	0.000590446		cholestanol
1418370_at	167	0.000591918		ergothioneine
1423797_at	275	0.000592247		N-acetylglucosamine 6-phosphate
1425215_at	335	0.00059332		sorbitol
1435945_a_at	68	0.000593473		2-oleoylglycerophosphoserine*
1419504_at	9	0.00059354		1-arachidonoylglycerophosphocholine (20:4n6)*
1423866_at	180	0.000593607		gamma-glutamylglutamate
1454638_a_at	297	0.000594281		pantothenate
1423327_at	80	0.000594963		3-ureidopropionate
1420633_a_at	171	0.000595932		ethanolamine
1450883_a_at	121	0.000596088		aspartate
1448752_at	61	0.000598635		2-linoleoylglycerol (2-monolinolein)
1418897_at	245	0.000598664		leucylserine
1425215_at	316	0.000599241		proline
1422677_at	295	0.000599385		palmitoyl sphingomyelin
1423488_at	131	0.000600255		campesterol
1451527_at	9	0.000600966		1-arachidonoylglycerophosphocholine (20:4n6)*
1450805_at	116	0.000601071		arachidonate (20:4n6)
1418243_at	139	0.000601657		cholesterol
1416617_at	137	0.000602693		chiro-inositol
1417346_at	201	0.000602732		glycerophosphorylcholine (GPC)
1451322_at	304	0.000602868		phenylacetylglycine
1417741_at	260	0.000603319		methionine
1426634_at	66	0.000605659		2-oleoylglycerophosphoethanolamine*
1437902_s_at	171	0.00060603		ethanolamine
1417884_at	85	0.000606067		5-methyltetrahydrofolate (5MeTHF)
1417680_at	282	0.000608215		N-glycolylneuraminate
1423809_at	132	0.000608342		caprate (10:0)
1437644_at	34	0.000610771		1-palmitoylglycerol (1-monopalmitin)
1419662_at	290	0.000611432		ornithine
1417872_at	100	0.000611821		adenosine 5'diphosphoribose
1422678_at	290	0.000612568		ornithine
1421921_at	264	0.000612669		methylphosphate
1449461_at	78	0.000613126		3-phosphoglycerate
1417639_at	325	0.000614874		riboflavin (Vitamin B2)
1424008_a_at	260	0.000614951		methionine
1426235_a_at	102	0.000615326		adrenate (22:4n6)
1449319_at	61	0.000616288		2-linoleoylglycerol (2-monolinolein)
1449764_x_at	228	0.000617021		Isobar: ribulose 5-phosphate, xylulose 5-phosphate
1451320_at	66	0.0006177		2-oleoylglycerophosphoethanolamine*
1416318_at	100	0.000618064		adenosine 5'diphosphoribose
1449388_at	169	0.000618925		erythritol
1448251_at	225	0.000619209		inositol 1-phosphate (I1P)
1452349_x_at	324	0.000619813		ribitol
1423500_a_at	12	0.000620238		1-dihomo-linoleoylglycerophosphocholine (20:2n6)*
1419663_at	290	0.000620489		ornithine
1421328_at	18	0.000620607		1-hexadecanol
1436991_x_at	284	0.000620708		nicotinamide adenine dinucleotide (NAD+)
1426341_at	275	0.000620926		N-acetylglucosamine 6-phosphate
1417347_at	283	0.000622103		nicotinamide
1417851_at	365	0.000623997		uridine
1427183_at	138	0.000624282		cholestanol
1419073_at	304	0.000625388		phenylacetylglycine
1423284_at	127	0.000626072		beta-sitosterol
1422748_at	31	0.000626298		1-oleoylglycerophosphoserine
1448919_at	282	0.000626399		N-glycolylneuraminate
1426210_x_at	1	0.000626524		1,5-anhydroglucitol (1,5-AG)
1420654_a_at	371	0.000626559		xanthine
1449568_at	186	0.000626632		gamma-glutamyltryptophan
1419556_at	163	0.00062792		docosapentaenoate (n6 DPA; 22:5n6)
1417956_at	245	0.000628462		leucylserine
1416639_at	283	0.000629131		nicotinamide
1427345_a_at	290	0.000629706		ornithine
1449154_at	37	0.000629773		1-palmitoylglycerophosphoinositol*
1418003_at	251	0.000631719		lysine
1423866_at	275	0.00063321		N-acetylglucosamine 6-phosphate
1416432_at	282	0.000633568		N-glycolylneuraminate
1418486_at	38	0.00063391		1-palmitoylplasmenylethanolamine*
1417129_a_at	61	0.000634008		2-linoleoylglycerol (2-monolinolein)
1452231_x_at	118	0.000634435		ascorbate (Vitamin C)
1417650_at	345	0.000634482		succinate
1420654_a_at	174	0.000634576		fructose-6-phosphate
1417862_at	285	0.00063468		nicotinamide riboside*
1424114_s_at	277	0.000639195		N-acetylneuraminate
1426268_at	75	0.000639954		3'-dephosphocoenzyme A
1417649_at	61	0.000640012		2-linoleoylglycerol (2-monolinolein)
1422605_at	200	0.00064038		glycerol 3-phosphate (G3P)
1424030_at	102	0.000640526		adrenate (22:4n6)
1452161_at	181	0.000641252		gamma-glutamylisoleucine*
1451828_a_at	157	0.000641621		dihomo-linoleate (20:2n6)
1423166_at	358	0.000643198		trans-urocanate
1425002_at	73	0.000643328		3-(4-hydroxyphenyl)lactate
1418897_at	243	0.000643378		leucylglycine
1451128_s_at	374	0.000644359		xylulose
1424626_at	201	0.00064445		glycerophosphorylcholine (GPC)
1448299_at	297	0.000645007		pantothenate
1419124_at	114	0.000645439		arabitol
1448730_at	276	0.000646499		N-acetylmethionine
1429294_at	374	0.000646989		xylulose
1418091_at	271	0.000647057		N6-acetyllysine
1417346_at	127	0.000647105		beta-sitosterol
1451512_s_at	96	0.000647852		adenine
1449131_s_at	356	0.000651279		thymine
1423439_at	359	0.000651789		tryptophan
1425251_at	116	0.000652423		arachidonate (20:4n6)
1427183_at	255	0.000653012		mannitol
1421173_at	18	0.000654213		1-hexadecanol
1421546_a_at	132	0.000654382		caprate (10:0)
1451246_s_at	374	0.00065489		xylulose
1424008_a_at	239	0.000655793		laurate (12:0)
1418979_at	282	0.000656017		N-glycolylneuraminate
1419704_at	67	0.000656385		2-oleoylglycerophosphoinositol*
1424842_a_at	134	0.000656809		carnosine
1418091_at	314	0.000657298		pipecolate
1424308_at	299	0.000658318		pelargonate (9:0)
1417358_s_at	71	0.000658328		2-palmitoylglycerophosphoethanolamine*
1419700_a_at	285	0.000658411		nicotinamide riboside*
1418979_at	18	0.000658461		1-hexadecanol
1425792_a_at	69	0.000658605		2-palmitoylglycerol (2-monopalmitin)
1451322_at	279	0.000658887		N-acetylthreonine
1422602_a_at	362	0.000659458		uracil
1419663_at	100	0.000660225		adenosine 5'diphosphoribose
1425826_a_at	180	0.000660384		gamma-glutamylglutamate
1426978_at	68	0.00066109		2-oleoylglycerophosphoserine*
1420437_at	18	0.000661463		1-hexadecanol
1417429_at	282	0.000661915		N-glycolylneuraminate
1418773_at	28	0.000662414		1-oleoylglycerophosphoethanolamine
1425784_a_at	102	0.000662649		adrenate (22:4n6)
1451527_at	138	0.000663003		cholestanol
1418094_s_at	65	0.000663588		2-oleoylglycerophosphocholine*
1416134_at	16	0.000664622		1-eicosatrienoylglycerophosphoethanolamine*
1416749_at	114	0.000664624		arabitol
1418197_at	98	0.000665498		adenosine 2'-monophosphate (2'-AMP)
1452592_at	111	0.000665868		alpha-tocopherol
1432189_a_at	17	0.000666023		1-eicosenoylglycerophosphocholine (20:1n9)*
1417884_at	147	0.000666389		cysteine
1448649_at	13	0.000667123		1-docosahexaenoylglycerophosphocholine (22:6n3)*
1460714_at	315	0.000667516		pro-hydroxy-pro
1416639_at	325	0.000667615		riboflavin (Vitamin B2)
1428443_a_at	67	0.000668065		2-oleoylglycerophosphoinositol*
1448839_at	36	0.000668654		1-palmitoylglycerophosphoethanolamine
1420683_at	31	0.000669257		1-oleoylglycerophosphoserine
1419662_at	100	0.000669291		adenosine 5'diphosphoribose
1418849_x_at	65	0.00067033		2-oleoylglycerophosphocholine*
1452244_at	166	0.000671847		equol sulfate
1423774_a_at	132	0.000673077		caprate (10:0)
1425826_a_at	283	0.000673959		nicotinamide
1438511_a_at	257	0.000674399		mannose-6-phosphate
1423797_at	9	0.000674459		1-arachidonoylglycerophosphocholine (20:4n6)*
1451128_s_at	132	0.000674845		caprate (10:0)
1426914_at	31	0.000674858		1-oleoylglycerophosphoserine
1450883_a_at	45	0.000675685		2-aminoadipate
1424477_at	158	0.000676503		dihomo-linolenate (20:3n3 or n6)
1421374_a_at	299	0.000678178		pelargonate (9:0)
1424502_at	69	0.0006783		2-palmitoylglycerol (2-monopalmitin)
1423271_at	92	0.000679024		9,10-DiHOME
1437171_x_at	284	0.000679629		nicotinamide adenine dinucleotide (NAD+)
1460693_a_at	131	0.000681026		campesterol
1420981_a_at	147	0.000681574		cysteine
1425215_at	237	0.000682485		lactate
1453317_a_at	282	0.000682692		N-glycolylneuraminate
1436991_x_at	127	0.000683408		beta-sitosterol
1417877_at	175	0.000684004		fucose
1426914_at	282	0.000684048		N-glycolylneuraminate
1416639_at	199	0.000685172		glycerol 2-phosphate
1416933_at	71	0.000685932		2-palmitoylglycerophosphoethanolamine*
1451322_at	173	0.000686596		fructose
1421564_at	283	0.000687359		nicotinamide
1426867_at	71	0.000687367		2-palmitoylglycerophosphoethanolamine*
1418652_at	311	0.000687475		phosphate
1420664_s_at	71	0.000687889		2-palmitoylglycerophosphoethanolamine*
1417323_at	131	0.000688264		campesterol
1422252_a_at	49	0.000689122		2'-deoxyadenosine 3'-monophosphate
1424008_a_at	371	0.000689491		xanthine
1421002_at	326	0.000689574		ribose
1450639_at	351	0.0006908		threonine
1419674_a_at	36	0.000690924		1-palmitoylglycerophosphoethanolamine
1417858_at	114	0.000692299		arabitol
1456437_x_at	61	0.00069357		2-linoleoylglycerol (2-monolinolein)
1425809_at	99	0.000693678		adenosine 3'-monophosphate (3'-AMP)
1418766_s_at	66	0.000693845		2-oleoylglycerophosphoethanolamine*
1449466_at	324	0.000694094		ribitol
1423488_at	13	0.000695312		1-docosahexaenoylglycerophosphocholine (22:6n3)*
1450883_a_at	360	0.000696243		tyrosine
1439373_x_at	357	0.000697268		trans-4-hydroxyproline
1423489_at	100	0.00069811		adenosine 5'diphosphoribose
1435870_at	237	0.000698169		lactate
1423489_at	39	0.000698402		1-stearoylglycerol (1-monostearin)
1418765_at	66	0.000698889		2-oleoylglycerophosphoethanolamine*
1423488_at	290	0.000700365		ornithine
1418195_at	61	0.000700723		2-linoleoylglycerol (2-monolinolein)
1451371_at	11	0.00070107		1-arachidonoylglycerophosphoinositol*
1452160_at	140	0.000701288		choline
1418346_at	161	0.000702074		docosahexaenoate (DHA; 22:6n3)
1423084_at	324	0.000702146		ribitol
1425890_at	184	0.000703936		gamma-glutamylphenylalanine
1422537_a_at	114	0.000705258		arabitol
1437902_s_at	284	0.000709855		nicotinamide adenine dinucleotide (NAD+)
1422678_at	359	0.000710043		tryptophan
1450639_at	11	0.000710687		1-arachidonoylglycerophosphoinositol*
1424463_at	61	0.000711195		2-linoleoylglycerol (2-monolinolein)
1451407_at	66	0.00071147		2-oleoylglycerophosphoethanolamine*
1422748_at	65	0.000711619		2-oleoylglycerophosphocholine*
1436021_at	68	0.000711926		2-oleoylglycerophosphoserine*
1439018_at	36	0.000712631		1-palmitoylglycerophosphoethanolamine
1448649_at	304	0.000713154		phenylacetylglycine
1422678_at	11	0.000713738		1-arachidonoylglycerophosphoinositol*
1426243_at	61	0.000714117		2-linoleoylglycerol (2-monolinolein)
1460236_at	374	0.000714573		xylulose
1454622_at	353	0.00071483		threonylphenylalanine
1420438_at	160	0.000714874		dimethylarginine (SDMA + ADMA)
1417009_at	36	0.000715125		1-palmitoylglycerophosphoethanolamine
1423797_at	200	0.000715144		glycerol 3-phosphate (G3P)
1450082_s_at	28	0.000715227		1-oleoylglycerophosphoethanolamine
1426340_at	26	0.000716255		1-oleoylglycerol (1-monoolein)
1448573_a_at	137	0.000717039		chiro-inositol
1420444_at	60	0.000717258		2-hydroxystearate
1417639_at	95	0.000717307		Ac-Ser-Asp-Lys-Pro-OH
1418848_at	13	0.000719092		1-docosahexaenoylglycerophosphocholine (22:6n3)*
1422677_at	139	0.000719567		cholesterol
1450639_at	119	0.000719685		asparagine
1425216_at	362	0.000719766		uracil
1450131_a_at	135	0.00072016		catechol sulfate
1417956_at	246	0.000720176		leucylthreonine
1424357_at	191	0.000720853		glutamate
1448730_at	255	0.000721058		mannitol
1417765_a_at	290	0.000721089		ornithine
1451322_at	139	0.000721378		cholesterol
1426634_at	166	0.000723379		equol sulfate
1418897_at	322	0.000724328		putrescine
1418599_at	37	0.000724641		1-palmitoylglycerophosphoinositol*
1452716_at	75	0.000724755		3'-dephosphocoenzyme A
1448995_at	13	0.000725257		1-docosahexaenoylglycerophosphocholine (22:6n3)*
1424266_s_at	131	0.000727265		campesterol
1451322_at	260	0.00072905		methionine
1426340_at	275	0.000730054		N-acetylglucosamine 6-phosphate
1422678_at	360	0.000730311		tyrosine
1421134_at	163	0.000731582		docosapentaenoate (n6 DPA; 22:5n6)
1452534_a_at	132	0.000732019		caprate (10:0)
1452244_at	68	0.000732377		2-oleoylglycerophosphoserine*
1420444_at	272	0.000732426		N-acetylalanine
1449466_at	276	0.000732729		N-acetylmethionine
1421564_at	9	0.000733139		1-arachidonoylglycerophosphocholine (20:4n6)*
1424030_at	152	0.00073317		cytidine 5'-monophosphate (5'-CMP)
1448995_at	131	0.000735503		campesterol
1424008_a_at	104	0.000736721		alanine
1416623_at	325	0.000736948		riboflavin (Vitamin B2)
1427345_a_at	131	0.000736958		campesterol
1420280_x_at	117	0.000737		arginine
1437805_at	289	0.000738		ophthalmate
1416992_at	290	0.000738045		ornithine
1418940_at	102	0.000739381		adrenate (22:4n6)
1451371_at	39	0.000739681		1-stearoylglycerol (1-monostearin)
1419136_at	360	0.000740671		tyrosine
1423093_at	289	0.000740725		ophthalmate
1427183_at	95	0.00074074		Ac-Ser-Asp-Lys-Pro-OH
1437611_x_at	327	0.000741308		ribulose
1421564_at	260	0.000741454		methionine
1419144_at	34	0.000742385		1-palmitoylglycerol (1-monopalmitin)
1417639_at	139	0.000743633		cholesterol
1418472_at	372	0.000743986		xanthosine
1448839_at	282	0.000744342		N-glycolylneuraminate
1418472_at	175	0.000745455		fucose
1421921_at	311	0.00074594		phosphate
1420683_at	114	0.000745967		arabitol
1418243_at	290	0.000746448		ornithine
1436737_a_at	283	0.000746695		nicotinamide
1448949_at	11	0.000747131		1-arachidonoylglycerophosphoinositol*
1423166_at	362	0.00074842		uracil
1452793_at	101	0.00074851		adenosine 5'-monophosphate (AMP)
1423866_at	276	0.000748857		N-acetylmethionine
1416575_at	103	0.000749249		AICA ribonucleotide
1419314_at	76	0.000749804		3-hydroxybutyrate (BHBA)
1417635_at	3	0.000750352		10-nonadecenoate (19:1n9)
1451322_at	39	0.000750586		1-stearoylglycerol (1-monostearin)
1460372_at	67	0.000750898		2-oleoylglycerophosphoinositol*
1417323_at	282	0.000753831		N-glycolylneuraminate
1424630_a_at	289	0.000754134		ophthalmate
1427339_at	279	0.000754719		N-acetylthreonine
1417323_at	100	0.000755265		adenosine 5'diphosphoribose
1448147_at	167	0.000755673		ergothioneine
1423866_at	199	0.000757099		glycerol 2-phosphate
1418393_a_at	66	0.000757223		2-oleoylglycerophosphoethanolamine*
1420444_at	42	0.000758088		1-stearoylglycerophosphoinositol
1418983_at	255	0.000759345		mannitol
1448839_at	18	0.00075982		1-hexadecanol
1423166_at	45	0.000760161		2-aminoadipate
1422141_s_at	259	0.000761478		mead acid (20:3n9)
1427247_at	146	0.000762296		cys-gly, oxidized
1437171_x_at	127	0.000762697		beta-sitosterol
1418782_at	191	0.00076293		glutamate
1460734_at	36	0.00076372		1-palmitoylglycerophosphoethanolamine
1460715_x_at	315	0.000767588		pro-hydroxy-pro
1448730_at	359	0.000767943		tryptophan
1419175_a_at	156	0.000768344		deoxycarnitine
1417574_at	41	0.000768667		1-stearoylglycerophosphoethanolamine
1451498_at	137	0.00076889		chiro-inositol
1425216_at	239	0.000769586		laurate (12:0)
1417358_s_at	283	0.000770532		nicotinamide
1418472_at	88	0.000772505		5-oxoproline
1415812_at	364	0.000772886		urea
1417347_at	199	0.000773321		glycerol 2-phosphate
1453196_a_at	151	0.000773766		cytidine 5'-diphosphocholine
1423797_at	138	0.000774149		cholestanol
1425733_a_at	259	0.000774186		mead acid (20:3n9)
1420654_a_at	121	0.000775358		aspartate
1433531_at	157	0.00077575		dihomo-linoleate (20:2n6)
1434484_at	240	0.000776495		leucine
1417979_at	273	0.000776622		N-acetylaspartate (NAA)
1416639_at	48	0.000777179		2-arachidonoylglycerophosphoethanolamine*
1429295_s_at	154	0.000777262		cytidine-5'-diphosphoethanolamine
1436170_a_at	284	0.000777341		nicotinamide adenine dinucleotide (NAD+)
1416432_at	31	0.000777483		1-oleoylglycerophosphoserine
1421038_a_at	68	0.000777868		2-oleoylglycerophosphoserine*
1418027_at	132	0.000778842		caprate (10:0)
1417346_at	102	0.000780672		adrenate (22:4n6)
1416564_at	282	0.000780905		N-glycolylneuraminate
1423878_at	13	0.000781517		1-docosahexaenoylglycerophosphocholine (22:6n3)*
1418346_at	277	0.000782657		N-acetylneuraminate
1438953_at	282	0.000782822		N-glycolylneuraminate
1435870_at	135	0.000783392		catechol sulfate
1452919_a_at	152	0.000784821		cytidine 5'-monophosphate (5'-CMP)
1416992_at	39	0.000785333		1-stearoylglycerol (1-monostearin)
1424266_s_at	275	0.00078614		N-acetylglucosamine 6-phosphate
1456312_x_at	127	0.000786997		beta-sitosterol
1437806_x_at	289	0.00078748		ophthalmate
1416933_at	127	0.00078754		beta-sitosterol
1417639_at	305	0.00078781		phenylalanine
1448250_at	36	0.00078886		1-palmitoylglycerophosphoethanolamine
1438511_a_at	371	0.000790116		xanthine
1422602_a_at	279	0.000791177		N-acetylthreonine
1416617_at	147	0.000791245		cysteine
1419485_at	41	0.000791618		1-stearoylglycerophosphoethanolamine
1420654_a_at	305	0.000791746		phenylalanine
1427213_at	127	0.00079199		beta-sitosterol
1421571_a_at	68	0.00079284		2-oleoylglycerophosphoserine*
1450639_at	295	0.000793715		palmitoyl sphingomyelin
1420438_at	255	0.0007942		mannitol
1423084_at	127	0.000794659		beta-sitosterol
1448547_at	67	0.000795074		2-oleoylglycerophosphoinositol*
1424155_at	99	0.000796345		adenosine 3'-monophosphate (3'-AMP)
1450922_a_at	137	0.000796451		chiro-inositol
1420633_a_at	284	0.000796637		nicotinamide adenine dinucleotide (NAD+)
1419475_a_at	34	0.000797027		1-palmitoylglycerol (1-monopalmitin)
1417741_at	202	0.000797196		glycine
1422562_at	26	0.000797579		1-oleoylglycerol (1-monoolein)
1418190_at	18	0.000800035		1-hexadecanol
1424815_at	311	0.000800649		phosphate
1450884_at	368	0.000801021		valine
1449592_at	100	0.000801458		adenosine 5'diphosphoribose
1421564_at	264	0.000802563		methylphosphate
1449466_at	200	0.00080322		glycerol 3-phosphate (G3P)
1448226_at	80	0.000804134		3-ureidopropionate
1451972_at	225	0.000804873		inositol 1-phosphate (I1P)
1423166_at	360	0.000804922		tyrosine
1450884_at	192	0.000804988		glutamate, gamma-methyl ester
1450883_a_at	94	0.000805653		acetylphosphate
1421564_at	11	0.000805739		1-arachidonoylglycerophosphoinositol*
1449218_at	145	0.000806874		creatine
1436737_a_at	199	0.000807871		glycerol 2-phosphate
1449038_at	255	0.000808235		mannitol
1431591_s_at	151	0.000811964		cytidine 5'-diphosphocholine
1448649_at	42	0.000812746		1-stearoylglycerophosphoinositol
1418320_at	166	0.000812756		equol sulfate
1448842_at	138	0.000813531		cholestanol
1452231_x_at	200	0.00081371		glycerol 3-phosphate (G3P)
1418113_at	177	0.000814398		galactose
1450884_at	94	0.000814663		acetylphosphate
1421001_a_at	161	0.000815222		docosahexaenoate (DHA; 22:6n3)
1427277_at	171	0.0008153		ethanolamine
1427345_a_at	11	0.000816863		1-arachidonoylglycerophosphoinositol*
1432179_x_at	253	0.000817526		maltose
1426300_at	198	0.000817755		glycerol
1426721_s_at	186	0.000818699		gamma-glutamyltryptophan
1438511_a_at	94	0.000819581		acetylphosphate
1423911_at	42	0.000819689		1-stearoylglycerophosphoinositol
1416639_at	138	0.000821323		cholestanol
1423489_at	304	0.000821552		phenylacetylglycine
1416652_at	49	0.000821746		2'-deoxyadenosine 3'-monophosphate
1424186_at	282	0.000822187		N-glycolylneuraminate
1418424_at	326	0.000822722		ribose
1417346_at	34	0.000823173		1-palmitoylglycerol (1-monopalmitin)
1450884_at	257	0.000823288		mannose-6-phosphate
1425837_a_at	137	0.000824061		chiro-inositol
1434484_at	160	0.000824186		dimethylarginine (SDMA + ADMA)
1418472_at	182	0.000824346		gamma-glutamylleucine
1424127_at	185	0.000824645		gamma-glutamylthreonine*
1415812_at	275	0.000824865		N-acetylglucosamine 6-phosphate
1418897_at	107	0.000826666		alanylphenylalanine
1425826_a_at	138	0.000826744		cholestanol
1422140_at	177	0.000826831		galactose
1419136_at	48	0.000829005		2-arachidonoylglycerophosphoethanolamine*
1420683_at	26	0.000830245		1-oleoylglycerol (1-monoolein)
1417910_at	154	0.000830615		cytidine-5'-diphosphoethanolamine
1417009_at	31	0.000830849		1-oleoylglycerophosphoserine
1417938_at	132	0.000832515		caprate (10:0)
1416564_at	13	0.000833933		1-docosahexaenoylglycerophosphocholine (22:6n3)*
1416630_at	127	0.000834073		beta-sitosterol
1452244_at	66	0.000834901		2-oleoylglycerophosphoethanolamine*
1438251_x_at	37	0.000835047		1-palmitoylglycerophosphoinositol*
1417574_at	42	0.000835277		1-stearoylglycerophosphoinositol
1426155_a_at	116	0.000835616		arachidonate (20:4n6)
1451698_at	290	0.000835888		ornithine
1424626_at	71	0.000836829		2-palmitoylglycerophosphoethanolamine*
1449456_a_at	332	0.000837032		serine
1418027_at	49	0.000837271		2'-deoxyadenosine 3'-monophosphate
1427277_at	284	0.000839654		nicotinamide adenine dinucleotide (NAD+)
1449038_at	290	0.000840083		ornithine
1451322_at	239	0.000840418		laurate (12:0)
1421038_a_at	152	0.000841276		cytidine 5'-monophosphate (5'-CMP)
1426817_at	154	0.000841428		cytidine-5'-diphosphoethanolamine
1456676_a_at	225	0.000841886		inositol 1-phosphate (I1P)
1451537_at	47	0.000843257		2-arachidonoylglycerophosphocholine*
1421564_at	71	0.000843491		2-palmitoylglycerophosphoethanolamine*
1448251_at	299	0.000843773		pelargonate (9:0)
1423092_at	374	0.000844431		xylulose
1420655_at	171	0.000847049		ethanolamine
1421681_at	230	0.000847925		isoleucine
1425216_at	11	0.000848537		1-arachidonoylglycerophosphoinositol*
1416757_at	132	0.000850117		caprate (10:0)
1416639_at	9	0.00085041		1-arachidonoylglycerophosphocholine (20:4n6)*
1430998_at	374	0.000850644		xylulose
1424127_at	88	0.000850779		5-oxoproline
1426662_at	152	0.000850978		cytidine 5'-monophosphate (5'-CMP)
1417788_at	36	0.000851066		1-palmitoylglycerophosphoethanolamine
1423439_at	119	0.000851508		asparagine
1434195_at	101	0.000851981		adenosine 5'-monophosphate (AMP)
1426235_a_at	114	0.000852608		arabitol
1450883_a_at	119	0.000852979		asparagine
1427277_at	274	0.000853503		N-acetyl-aspartyl-glutamate (NAAG)
1424007_at	100	0.000853632		adenosine 5'diphosphoribose
1421571_a_at	127	0.000853759		beta-sitosterol
1422602_a_at	371	0.000854529		xanthine
1434484_at	332	0.000856532		serine
1448752_at	20	0.000857651		1-linoleoylglycerol (1-monolinolein)
1424408_at	356	0.00085768		thymine
1424842_a_at	212	0.000858128		hippurate
1419704_at	158	0.000860009		dihomo-linolenate (20:3n3 or n6)
1415905_at	16	0.000860668		1-eicosatrienoylglycerophosphoethanolamine*
1424842_a_at	256	0.000861077		mannose
1425216_at	170	0.000861449		erythronate*
1419073_at	139	0.000861555		cholesterol
1424900_at	73	0.000863451		3-(4-hydroxyphenyl)lactate
1421134_at	68	0.000863892		2-oleoylglycerophosphoserine*
1418486_at	302	0.000864254		phenol sulfate
1450883_a_at	362	0.000864841		uracil
1451512_s_at	251	0.000865218		lysine
1417639_at	138	0.000865686		cholestanol
1427355_at	18	0.000867721		1-hexadecanol
1438511_a_at	331	0.000867844		sedoheptulose-7-phosphate
1435870_at	239	0.000868109		laurate (12:0)
1450344_a_at	65	0.000868408		2-oleoylglycerophosphocholine*
1455796_x_at	61	0.000868654		2-linoleoylglycerol (2-monolinolein)
1427213_at	364	0.000868818		urea
1422293_a_at	282	0.000869123		N-glycolylneuraminate
1417541_at	132	0.000869605		caprate (10:0)
1452349_x_at	180	0.000870659		gamma-glutamylglutamate
1415812_at	274	0.000870825		N-acetyl-aspartyl-glutamate (NAAG)
1450883_a_at	359	0.000871684		tryptophan
1456569_x_at	34	0.000872044		1-palmitoylglycerol (1-monopalmitin)
1417347_at	264	0.000872312		methylphosphate
1423166_at	260	0.00087238		methionine
1449131_s_at	14	0.000872594		1-docosahexaenoylglycerophosphoethanolamine*
1418320_at	127	0.00087358		beta-sitosterol
1415994_at	225	0.000874319		inositol 1-phosphate (I1P)
1425581_s_at	66	0.000874987		2-oleoylglycerophosphoethanolamine*
1449466_at	201	0.000875149		glycerophosphorylcholine (GPC)
1417273_at	66	0.000876031		2-oleoylglycerophosphoethanolamine*
1417358_s_at	111	0.00087615		alpha-tocopherol
1416558_at	374	0.000876172		xylulose
1426869_at	181	0.000877917		gamma-glutamylisoleucine*
1451371_at	138	0.000877998		cholestanol
1428105_at	327	0.000878594		ribulose
1450639_at	362	0.000878902		uracil
1425415_a_at	172	0.000879497		flavin adenine dinucleotide (FAD)
1417347_at	71	0.000880469		2-palmitoylglycerophosphoethanolamine*
1421173_at	299	0.000881717		pelargonate (9:0)
1418897_at	334	0.000882613		serylphenyalanine
1418595_at	295	0.000882786		palmitoyl sphingomyelin
1424677_at	80	0.000883062		3-ureidopropionate
1448859_at	182	0.000883301		gamma-glutamylleucine
1423166_at	305	0.000884585		phenylalanine
1418091_at	218	0.000886112		hydroxybutyrylcarnitine*
1415812_at	284	0.000886184		nicotinamide adenine dinucleotide (NAD+)
1438511_a_at	357	0.000886692		trans-4-hydroxyproline
1450639_at	48	0.000886707		2-arachidonoylglycerophosphoethanolamine*
1451527_at	200	0.000888042		glycerol 3-phosphate (G3P)
1419556_at	147	0.00088819		cysteine
1451511_at	10	0.000888762		1-arachidonoylglycerophosphoethanolamine*
1418940_at	111	0.000889098		alpha-tocopherol
1418091_at	76	0.000889164		3-hydroxybutyrate (BHBA)
1416933_at	34	0.000889733		1-palmitoylglycerol (1-monopalmitin)
1428788_at	152	0.000890435		cytidine 5'-monophosphate (5'-CMP)
1452919_a_at	114	0.000891028		arabitol
1451322_at	202	0.000891158		glycine
1425826_a_at	199	0.00089161		glycerol 2-phosphate
1434484_at	305	0.00089172		phenylalanine
1424404_at	313	0.000892493		phosphoethanolamine
1423506_a_at	9	0.000892693		1-arachidonoylglycerophosphocholine (20:4n6)*
1419373_at	181	0.000892804		gamma-glutamylisoleucine*
1430889_a_at	26	0.00089332		1-oleoylglycerol (1-monoolein)
1417639_at	332	0.000893795		serine
1450993_at	132	0.000895019		caprate (10:0)
1418424_at	108	0.000895209		allantoin
1450883_a_at	305	0.000895496		phenylalanine
1423093_at	52	0.000895926		2'-deoxyguanosine
1425251_at	168	0.000896347		erucate (22:1n9)
1418243_at	299	0.000896464		pelargonate (9:0)
1420654_a_at	230	0.000897371		isoleucine
1448554_s_at	97	0.000898421		adenosine
1419674_a_at	282	0.000899291		N-glycolylneuraminate
1451512_s_at	176	0.000899444		fumarate
1419495_at	42	0.000900673		1-stearoylglycerophosphoinositol
1456676_a_at	31	0.000901053		1-oleoylglycerophosphoserine
1436737_a_at	34	0.000901445		1-palmitoylglycerol (1-monopalmitin)
1417952_at	135	0.000902473		catechol sulfate
1416123_at	151	0.000903856		cytidine 5'-diphosphocholine
1424128_x_at	154	0.00090409		cytidine-5'-diphosphoethanolamine
1417741_at	192	0.000904171		glutamate, gamma-methyl ester
1449456_a_at	180	0.000905348		gamma-glutamylglutamate
1418318_at	183	0.000906188		gamma-glutamylmethionine
1418243_at	13	0.000908315		1-docosahexaenoylglycerophosphocholine (22:6n3)*
1418897_at	234	0.000908421		isoleucylthreonine
1438251_x_at	114	0.00090861		arabitol
1425737_at	161	0.000910503		docosahexaenoate (DHA; 22:6n3)
1416120_at	80	0.000911348		3-ureidopropionate
1427517_at	140	0.000911407		choline
1450344_a_at	111	0.000912051		alpha-tocopherol
1417851_at	125	0.00091246		beta-alanine
1416639_at	264	0.000912652		methylphosphate
1451511_at	329	0.000914458		sarcosine (N-Methylglycine)
1434484_at	95	0.000915837		Ac-Ser-Asp-Lys-Pro-OH
1418486_at	279	0.000916875		N-acetylthreonine
1421921_at	170	0.000917574		erythronate*
1449456_a_at	175	0.000918505		fucose
1418652_at	178	0.000919901		gamma-aminobutyrate (GABA)
1415994_at	299	0.000920515		pelargonate (9:0)
1417403_at	86	0.000921854		5-methylthioadenosine (MTA)
1426341_at	26	0.00092348		1-oleoylglycerol (1-monoolein)
1416639_at	11	0.000925177		1-arachidonoylglycerophosphoinositol*
1421681_at	131	0.000925647		campesterol
1450883_a_at	240	0.000926227		leucine
1419086_at	254	0.000926458		maltotriose
1452115_a_at	254	0.000926727		maltotriose
1417299_at	49	0.000928097		2'-deoxyadenosine 3'-monophosphate
1448730_at	240	0.000928897		leucine
1421173_at	282	0.000930044		N-glycolylneuraminate
1423084_at	180	0.000930447		gamma-glutamylglutamate
1436737_a_at	71	0.00093052		2-palmitoylglycerophosphoethanolamine*
1423284_at	313	0.000932947		phosphoethanolamine
1448752_at	26	0.000934109		1-oleoylglycerol (1-monoolein)
1448878_at	132	0.000934528		caprate (10:0)
1426721_s_at	181	0.000935428		gamma-glutamylisoleucine*
1419504_at	276	0.000935869		N-acetylmethionine
1419674_a_at	18	0.000937157		1-hexadecanol
1438842_at	52	0.000937355		2'-deoxyguanosine
1438852_x_at	52	0.000938478		2'-deoxyguanosine
1451511_at	355	0.000938506		thymidine
1421058_at	313	0.000938559		phosphoethanolamine
1419662_at	225	0.000938908		inositol 1-phosphate (I1P)
1417347_at	138	0.000938967		cholestanol
1424357_at	176	0.000939696		fumarate
1438082_at	282	0.000940211		N-glycolylneuraminate
1422678_at	295	0.00094089		palmitoyl sphingomyelin
1418697_at	131	0.000941875		campesterol
1426147_s_at	366	0.000942651		uridine monophosphate (5' or 3')
1422605_at	364	0.000944709		urea
1423166_at	121	0.000945858		aspartate
1419136_at	325	0.000945946		riboflavin (Vitamin B2)
1449403_at	16	0.00094656		1-eicosatrienoylglycerophosphoethanolamine*
1421564_at	201	0.000947166		glycerophosphorylcholine (GPC)
1437583_x_at	137	0.000947917		chiro-inositol
1415812_at	127	0.000949537		beta-sitosterol
1417644_at	68	0.000950048		2-oleoylglycerophosphoserine*
1417404_at	216	0.000951048		homoserine
1451371_at	9	0.000951938		1-arachidonoylglycerophosphocholine (20:4n6)*
1449456_a_at	178	0.000952649		gamma-aminobutyrate (GABA)
1452592_at	168	0.000953318		erucate (22:1n9)
1450240_a_at	181	0.000953336		gamma-glutamylisoleucine*
1416702_at	1	0.000954001		1,5-anhydroglucitol (1,5-AG)
1438251_x_at	66	0.000954554		2-oleoylglycerophosphoethanolamine*
1423284_at	284	0.00095658		nicotinamide adenine dinucleotide (NAD+)
1426134_at	64	0.000956916		2-methylbutyrylcarnitine (C5)
1426319_at	2	0.000957198		10-heptadecenoate (17:1n7)
1454638_a_at	165	0.000958216		eicosenoate (20:1n9 or 11)
1420655_at	34	0.000958615		1-palmitoylglycerol (1-monopalmitin)
1448995_at	71	0.000959271		2-palmitoylglycerophosphoethanolamine*
1449534_at	135	0.000959568		catechol sulfate
1418094_s_at	11	0.000960041		1-arachidonoylglycerophosphoinositol*
1449218_at	219	0.000960375		hydroxyisovaleroyl carnitine
1421921_at	175	0.000960726		fucose
1453596_at	152	0.000961512		cytidine 5'-monophosphate (5'-CMP)
1417639_at	173	0.000961972		fructose
1419000_at	306	0.000962432		phenylalanylalanine
1449456_a_at	201	0.000962488		glycerophosphorylcholine (GPC)
1425890_at	179	0.000962809		gamma-glutamylalanine
1450344_a_at	138	0.000963084		cholestanol
1424556_at	137	0.000963128		chiro-inositol
1436737_a_at	138	0.000963907		cholestanol
1451972_at	255	0.000964153		mannitol
1425109_at	166	0.00096438		equol sulfate
1418243_at	100	0.000966636		adenosine 5'diphosphoribose
1418281_at	327	0.000968273		ribulose
1450974_at	18	0.000969012		1-hexadecanol
1419662_at	299	0.000969283		pelargonate (9:0)
1423878_at	282	0.000970408		N-glycolylneuraminate
1452004_at	18	0.000970508		1-hexadecanol
1426225_at	299	0.000971536		pelargonate (9:0)
1449466_at	275	0.000973485		N-acetylglucosamine 6-phosphate
1423489_at	290	0.000973671		ornithine
1427477_at	85	0.000973904		5-methyltetrahydrofolate (5MeTHF)
1422428_at	285	0.000974364		nicotinamide riboside*
1424357_at	360	0.000974426		tyrosine
1425826_a_at	173	0.00097475		fructose
1418595_at	10	0.000975116		1-arachidonoylglycerophosphoethanolamine*
1417388_at	269	0.000975132		N1-methylguanosine
1423488_at	282	0.000976462		N-glycolylneuraminate
1429294_at	154	0.000980115		cytidine-5'-diphosphoethanolamine
1450344_a_at	173	0.000980613		fructose
1450639_at	190	0.000982583		glucose-6-phosphate (G6P)
1449203_at	161	0.000982653		docosahexaenoate (DHA; 22:6n3)
1436737_a_at	275	0.000982789		N-acetylglucosamine 6-phosphate
1422602_a_at	331	0.000983276		sedoheptulose-7-phosphate
1416318_at	225	0.000983575		inositol 1-phosphate (I1P)
1435943_at	26	0.000984284		1-oleoylglycerol (1-monoolein)
1423866_at	255	0.000984599		mannitol
1456676_a_at	36	0.000985154		1-palmitoylglycerophosphoethanolamine
1452260_at	100	0.000985678		adenosine 5'diphosphoribose
1418983_at	275	0.000986833		N-acetylglucosamine 6-phosphate
1427247_at	183	0.000987436		gamma-glutamylmethionine
1424362_at	147	0.000987615		cysteine
1426911_at	34	0.000988898		1-palmitoylglycerol (1-monopalmitin)
1424626_at	364	0.000991013		urea
1427345_a_at	225	0.000991798		inositol 1-phosphate (I1P)
1416749_at	166	0.00099191		equol sulfate
1424007_at	41	0.000995666		1-stearoylglycerophosphoethanolamine
1424357_at	240	0.000995668		leucine
1449147_at	171	0.000995807		ethanolamine
1417358_s_at	199	0.000996064		glycerol 2-phosphate
1416639_at	202	0.000996871		glycine
1425216_at	39	0.000997411		1-stearoylglycerol (1-monostearin)
1448995_at	39	0.000997934		1-stearoylglycerol (1-monostearin)
1448529_at	31	0.000998551		1-oleoylglycerophosphoserine
1448995_at	225	0.000999211		inositol 1-phosphate (I1P)
1423488_at	100	0.000999376		adenosine 5'diphosphoribose
1418094_s_at	39	0.000999854		1-stearoylglycerol (1-monostearin)
1423797_at	264	0.00100189		methylphosphate
1448949_at	100	0.00100199		adenosine 5'diphosphoribose
1422677_at	276	0.00100313		N-acetylmethionine
1423166_at	240	0.00100492		leucine
1419136_at	359	0.00100501		tryptophan
1449319_at	65	0.00100516		2-oleoylglycerophosphocholine*
1448145_at	132	0.00100551		caprate (10:0)
1460386_a_at	165	0.00100629		eicosenoate (20:1n9 or 11)
1418697_at	230	0.00100641		isoleucine
1420545_a_at	374	0.00100735		xylulose
1415806_at	213	0.00100748		histamine
1452136_at	68	0.00100838		2-oleoylglycerophosphoserine*
1427020_at	69	0.00100919		2-palmitoylglycerol (2-monopalmitin)
1422602_a_at	237	0.00100928		lactate
1417235_at	198	0.00100956		glycerol
1418197_at	214	0.00101042		histidine
1419136_at	98	0.00101069		adenosine 2'-monophosphate (2'-AMP)
1418849_x_at	225	0.00101136		inositol 1-phosphate (I1P)
1423489_at	299	0.00101137		pelargonate (9:0)
1426906_at	125	0.00101145		beta-alanine
1426218_at	34	0.00101163		1-palmitoylglycerol (1-monopalmitin)
1424008_a_at	170	0.00101282		erythronate*
1428571_at	198	0.00101356		glycerol
1420549_at	327	0.00101376		ribulose
1417877_at	372	0.0010144		xanthosine
1417680_at	299	0.00101478		pelargonate (9:0)
1451375_at	34	0.00101568		1-palmitoylglycerol (1-monopalmitin)
1422602_a_at	351	0.0010159		threonine
1451512_s_at	357	0.00101591		trans-4-hydroxyproline
1453596_at	31	0.00101677		1-oleoylglycerophosphoserine
1417273_at	37	0.00101682		1-palmitoylglycerophosphoinositol*
1417639_at	240	0.00101752		leucine
1450884_at	316	0.00101767		proline
1415921_a_at	340	0.00101774		stachydrine
1449335_at	147	0.00101832		cysteine
1419495_at	32	0.00101904		1-oleoylplasmenylethanolamine*
1453596_at	114	0.00101923		arabitol
1424041_s_at	18	0.00101927		1-hexadecanol
1455901_at	304	0.00102112		phenylacetylglycine
1424008_a_at	351	0.00102142		threonine
1416623_at	118	0.0010218		ascorbate (Vitamin C)
1427213_at	201	0.00102194		glycerophosphorylcholine (GPC)
1451407_at	166	0.00102234		equol sulfate
1417074_at	85	0.00102327		5-methyltetrahydrofolate (5MeTHF)
1424524_at	127	0.00102438		beta-sitosterol
1417618_at	80	0.00102464		3-ureidopropionate
1420712_a_at	71	0.0010248		2-palmitoylglycerophosphoethanolamine*
1417403_at	41	0.00102545		1-stearoylglycerophosphoethanolamine
1426340_at	34	0.00102613		1-palmitoylglycerol (1-monopalmitin)
1417649_at	20	0.00102653		1-linoleoylglycerol (1-monolinolein)
1425606_at	26	0.00102762		1-oleoylglycerol (1-monoolein)
1417133_at	102	0.00102788		adrenate (22:4n6)
1419549_at	102	0.00102789		adrenate (22:4n6)
1416623_at	332	0.00102802		serine
1416992_at	299	0.00102886		pelargonate (9:0)
1422587_at	282	0.00102913		N-glycolylneuraminate
1416321_s_at	277	0.00103004		N-acetylneuraminate
1418100_at	103	0.00103006		AICA ribonucleotide
1423619_at	100	0.00103283		adenosine 5'diphosphoribose
1438082_at	290	0.0010333		ornithine
1452349_x_at	182	0.00103442		gamma-glutamylleucine
1425212_a_at	340	0.00103461		stachydrine
1418608_at	93	0.00103547		acetylcarnitine
1455791_at	289	0.00103624		ophthalmate
1416992_at	138	0.00103677		cholestanol
1423284_at	34	0.00103726		1-palmitoylglycerol (1-monopalmitin)
1429295_s_at	374	0.00103883		xylulose
1452231_x_at	125	0.00103973		beta-alanine
1449581_at	85	0.00104005		5-methyltetrahydrofolate (5MeTHF)
1419504_at	199	0.00104012		glycerol 2-phosphate
1420747_at	372	0.00104047		xanthosine
1425826_a_at	111	0.00104291		alpha-tocopherol
1424900_at	345	0.00104332		succinate
1418782_at	359	0.00104354		tryptophan
1419314_at	216	0.00104428		homoserine
1452412_at	80	0.00104453		3-ureidopropionate
1450883_a_at	260	0.0010446		methionine
1438511_a_at	96	0.00104479		adenine
1423911_at	39	0.00104524		1-stearoylglycerol (1-monostearin)
1451512_s_at	190	0.00104532		glucose-6-phosphate (G6P)
1426867_at	108	0.00104563		allantoin
1421021_at	103	0.00104768		AICA ribonucleotide
1417741_at	371	0.00104781		xanthine
1448254_at	66	0.00104842		2-oleoylglycerophosphoethanolamine*
1420655_at	200	0.00104947		glycerol 3-phosphate (G3P)
1420722_at	188	0.00104992		gamma-glutamylvaline
1425216_at	42	0.00105054		1-stearoylglycerophosphoinositol
1422602_a_at	174	0.00105257		fructose-6-phosphate
1421766_at	36	0.00105277		1-palmitoylglycerophosphoethanolamine
1422470_at	335	0.00105284		sorbitol
1451527_at	125	0.00105363		beta-alanine
1426869_at	184	0.00105415		gamma-glutamylphenylalanine
1425826_a_at	175	0.00105718		fucose
1424308_at	304	0.00105731		phenylacetylglycine
1424030_at	171	0.00105777		ethanolamine
1422677_at	359	0.00105872		tryptophan
1449456_a_at	182	0.00106061		gamma-glutamylleucine
1423305_at	177	0.00106092		galactose
1419504_at	283	0.00106129		nicotinamide
1422677_at	11	0.00106173		1-arachidonoylglycerophosphoinositol*
1453596_at	61	0.00106196		2-linoleoylglycerol (2-monolinolein)
1417358_s_at	138	0.00106254		cholestanol
1430306_a_at	102	0.00106316		adrenate (22:4n6)
1460715_x_at	314	0.00106332		pipecolate
1427183_at	131	0.00106363		campesterol
1417639_at	201	0.00106623		glycerophosphorylcholine (GPC)
1449219_at	67	0.00106634		2-oleoylglycerophosphoinositol*
1422678_at	240	0.00106653		leucine
1417639_at	324	0.00106889		ribitol
1418872_at	372	0.00106932		xanthosine
1423866_at	200	0.00106959		glycerol 3-phosphate (G3P)
1424626_at	324	0.00107049		ribitol
1417741_at	170	0.00107297		erythronate*
1423084_at	264	0.0010732		methylphosphate
1449396_at	18	0.0010738		1-hexadecanol
1425793_a_at	27	0.00107394		1-oleoylglycerophosphocholine (18:1)
1423506_a_at	131	0.00107412		campesterol
1451511_at	99	0.00107469		adenosine 3'-monophosphate (3'-AMP)
1437644_at	201	0.0010747		glycerophosphorylcholine (GPC)
1427063_at	238	0.00107526		lactose
1450884_at	360	0.0010759		tyrosine
1460292_a_at	80	0.00107763		3-ureidopropionate
1420722_at	118	0.00107947		ascorbate (Vitamin C)
1417933_at	100	0.00108041		adenosine 5'diphosphoribose
1418194_at	61	0.00108065		2-linoleoylglycerol (2-monolinolein)
1417404_at	99	0.0010807		adenosine 3'-monophosphate (3'-AMP)
1423260_at	297	0.00108143		pantothenate
1422470_at	32	0.0010821		1-oleoylplasmenylethanolamine*
1424630_a_at	52	0.00108232		2'-deoxyguanosine
1451498_at	85	0.00108264		5-methyltetrahydrofolate (5MeTHF)
1417164_at	68	0.0010828		2-oleoylglycerophosphoserine*
1455901_at	38	0.00108281		1-palmitoylplasmenylethanolamine*
1449592_at	39	0.00108299		1-stearoylglycerol (1-monostearin)
1426231_at	259	0.00108492		mead acid (20:3n9)
1417133_at	71	0.00108556		2-palmitoylglycerophosphoethanolamine*
1422677_at	225	0.00108593		inositol 1-phosphate (I1P)
1421038_a_at	127	0.00108594		beta-sitosterol
1418243_at	170	0.00108597		erythronate*
1460416_s_at	259	0.00108607		mead acid (20:3n9)
1417741_at	48	0.00108671		2-arachidonoylglycerophosphoethanolamine*
1421681_at	304	0.00108912		phenylacetylglycine
1420655_at	127	0.00109014		beta-sitosterol
1416623_at	182	0.00109109		gamma-glutamylleucine
1449145_a_at	36	0.00109174		1-palmitoylglycerophosphoethanolamine
1421374_a_at	18	0.00109195		1-hexadecanol
1448949_at	71	0.00109209		2-palmitoylglycerophosphoethanolamine*
1428781_at	273	0.00109304		N-acetylaspartate (NAA)
1418424_at	71	0.00109369		2-palmitoylglycerophosphoethanolamine*
1423439_at	290	0.00109459		ornithine
1419504_at	180	0.00109553		gamma-glutamylglutamate
1423084_at	34	0.00109567		1-palmitoylglycerol (1-monopalmitin)
1417569_at	198	0.00109606		glycerol
1435176_a_at	152	0.00109709		cytidine 5'-monophosphate (5'-CMP)
1424524_at	152	0.0010974		cytidine 5'-monophosphate (5'-CMP)
1427213_at	138	0.00109823		cholestanol
1421002_at	170	0.00109891		erythronate*
1423166_at	192	0.00109905		glutamate, gamma-methyl ester
1439018_at	31	0.00109971		1-oleoylglycerophosphoserine
1424266_s_at	225	0.00109979		inositol 1-phosphate (I1P)
1415812_at	180	0.00110053		gamma-glutamylglutamate
1420655_at	283	0.00110103		nicotinamide
1426906_at	186	0.00110105		gamma-glutamyltryptophan
1423506_a_at	138	0.00110163		cholestanol
1417952_at	197	0.00110199		glycerate
1421733_a_at	85	0.0011022		5-methyltetrahydrofolate (5MeTHF)
1417587_at	289	0.00110269		ophthalmate
1418835_at	166	0.00110295		equol sulfate
1425251_at	111	0.00110399		alpha-tocopherol
1449244_at	269	0.00110513		N1-methylguanosine
1417979_at	280	0.00110538		N-delta-acetylornithine*
1424008_a_at	38	0.00110614		1-palmitoylplasmenylethanolamine*
1448696_at	80	0.00110773		3-ureidopropionate
1425416_s_at	36	0.00110821		1-palmitoylglycerophosphoethanolamine
1456568_at	34	0.00110891		1-palmitoylglycerol (1-monopalmitin)
1423506_a_at	199	0.00110985		glycerol 2-phosphate
1460693_a_at	42	0.00111058		1-stearoylglycerophosphoinositol
1424477_at	16	0.00111083		1-eicosatrienoylglycerophosphoethanolamine*
1426937_at	166	0.00111095		equol sulfate
1423506_a_at	255	0.00111132		mannitol
1416623_at	350	0.00111142		threonate
1418754_at	301	0.00111198		pentadecanoate (15:0)
1448752_at	36	0.00111333		1-palmitoylglycerophosphoethanolamine
1417765_a_at	230	0.0011138		isoleucine
1417863_at	65	0.00111398		2-oleoylglycerophosphocholine*
1418412_at	158	0.00111423		dihomo-linolenate (20:3n3 or n6)
1423166_at	359	0.00111463		tryptophan
1417858_at	34	0.00111491		1-palmitoylglycerol (1-monopalmitin)
1423084_at	102	0.00111649		adrenate (22:4n6)
1424509_at	67	0.00111661		2-oleoylglycerophosphoinositol*
1423250_a_at	147	0.00111671		cysteine
1416802_a_at	327	0.00111704		ribulose
1416639_at	362	0.00111741		uracil
1451698_at	131	0.00111777		campesterol
1421093_at	13	0.00111842		1-docosahexaenoylglycerophosphocholine (22:6n3)*
1417618_at	299	0.00111909		pelargonate (9:0)
1423439_at	255	0.00111932		mannitol
1418113_at	163	0.00112037		docosapentaenoate (n6 DPA; 22:5n6)
1455802_x_at	147	0.00112134		cysteine
1450922_a_at	163	0.00112135		docosapentaenoate (n6 DPA; 22:5n6)
1420369_a_at	259	0.00112139		mead acid (20:3n9)
1416664_at	49	0.00112151		2'-deoxyadenosine 3'-monophosphate
1451511_at	121	0.00112234		aspartate
1421564_at	170	0.00112313		erythronate*
1437582_at	137	0.00112427		chiro-inositol
1449218_at	107	0.00112462		alanylphenylalanine
1418782_at	255	0.00112466		mannitol
1419314_at	335	0.00112509		sorbitol
1416992_at	304	0.00112935		phenylacetylglycine
1425216_at	302	0.00112945		phenol sulfate
1460386_a_at	297	0.00113017		pantothenate
1420654_a_at	214	0.00113024		histidine
1455796_x_at	16	0.00113188		1-eicosatrienoylglycerophosphoethanolamine*
1427403_at	28	0.00113342		1-oleoylglycerophosphoethanolamine
1437644_at	274	0.00113414		N-acetyl-aspartyl-glutamate (NAAG)
1450639_at	176	0.00113446		fumarate
1416933_at	31	0.00113449		1-oleoylglycerophosphoserine
1427213_at	102	0.00113606		adrenate (22:4n6)
1432517_a_at	299	0.00113624		pelargonate (9:0)
1436563_at	327	0.00113752		ribulose
1421134_at	177	0.00113779		galactose
1417318_at	247	0.00113859		leu-leu-leu
1417022_at	103	0.00113928		AICA ribonucleotide
1437644_at	71	0.0011408		2-palmitoylglycerophosphoethanolamine*
1423284_at	171	0.00114083		ethanolamine
1448995_at	326	0.0011419		ribose
1419314_at	121	0.00114197		aspartate
1455901_at	326	0.00114396		ribose
1448995_at	138	0.00114536		cholestanol
1424128_x_at	49	0.00114607		2'-deoxyadenosine 3'-monophosphate
1452919_a_at	166	0.0011461		equol sulfate
1424008_a_at	139	0.00114643		cholesterol
1434319_at	289	0.00114681		ophthalmate
1448949_at	139	0.00114681		cholesterol
1418094_s_at	225	0.00114766		inositol 1-phosphate (I1P)
1448136_at	111	0.00114846		alpha-tocopherol
1438251_x_at	166	0.00114875		equol sulfate
1426867_at	304	0.00114897		phenylacetylglycine
1417346_at	324	0.00114972		ribitol
1422678_at	202	0.00115245		glycine
1418126_at	155	0.00115271		dehydroascorbate
1450639_at	100	0.0011528		adenosine 5'diphosphoribose
1436737_a_at	264	0.00115302		methylphosphate
1432491_at	249	0.00115307		linoleate (18:2n6)
1418897_at	246	0.00115378		leucylthreonine
1450546_at	142	0.00115426		cis-vaccenate (18:1n7)
1419136_at	276	0.0011543		N-acetylmethionine
1416779_at	80	0.00115637		3-ureidopropionate
1417765_a_at	191	0.00115663		glutamate
1450060_at	168	0.00115695		erucate (22:1n9)
1417639_at	368	0.00115787		valine
1452348_s_at	350	0.00115787		threonate
1423281_at	137	0.00115843		chiro-inositol
1418897_at	219	0.0011588		hydroxyisovaleroyl carnitine
1421681_at	139	0.00115898		cholesterol
1435870_at	279	0.00115981		N-acetylthreonine
1450974_at	282	0.00116006		N-glycolylneuraminate
1424099_at	341	0.00116078		stearate (18:0)
1428788_at	66	0.00116106		2-oleoylglycerophosphoethanolamine*
1426914_at	36	0.00116237		1-palmitoylglycerophosphoethanolamine
1417347_at	34	0.00116344		1-palmitoylglycerol (1-monopalmitin)
1423439_at	276	0.00116475		N-acetylmethionine
1418363_at	163	0.00116534		docosapentaenoate (n6 DPA; 22:5n6)
1452160_at	187	0.00116611		gamma-glutamyltyrosine
1418736_at	80	0.00116735		3-ureidopropionate
1421681_at	295	0.00116739		palmitoyl sphingomyelin
1423488_at	11	0.00116797		1-arachidonoylglycerophosphoinositol*
1450805_at	372	0.00117018		xanthosine
1418897_at	74	0.00117131		3-dehydrocarnitine*
1422678_at	368	0.0011727		valine
1419136_at	136	0.00117326		C-glycosyltryptophan*
1418094_s_at	13	0.00117352		1-docosahexaenoylglycerophosphocholine (22:6n3)*
1416639_at	125	0.00117397		beta-alanine
1453748_a_at	291	0.00117398		orotate
1418094_s_at	199	0.00117404		glycerol 2-phosphate
1450639_at	257	0.00117597		mannose-6-phosphate
1419136_at	160	0.00117668		dimethylarginine (SDMA + ADMA)
1422567_at	152	0.00117671		cytidine 5'-monophosphate (5'-CMP)
1417411_at	31	0.00117681		1-oleoylglycerophosphoserine
1426978_at	177	0.00117716		galactose
1423284_at	166	0.00117717		equol sulfate
1415921_a_at	336	0.00117723		spermidine
1423439_at	360	0.00117727		tyrosine
1417788_at	282	0.00117824		N-glycolylneuraminate
1451152_a_at	23	0.00117872		1-linoleoylglycerophosphoinositol*
1416527_at	34	0.00117891		1-palmitoylglycerol (1-monopalmitin)
1423489_at	138	0.00117897		cholestanol
1418804_at	100	0.00117972		adenosine 5'diphosphoribose
1425145_at	274	0.00117974		N-acetyl-aspartyl-glutamate (NAAG)
1419663_at	299	0.00117997		pelargonate (9:0)
1448421_s_at	49	0.00118078		2'-deoxyadenosine 3'-monophosphate
1460292_a_at	18	0.00118099		1-hexadecanol
1451527_at	71	0.00118204		2-palmitoylglycerophosphoethanolamine*
1416629_at	114	0.00118255		arabitol
1451371_at	199	0.00118277		glycerol 2-phosphate
1451824_at	156	0.00118281		deoxycarnitine
1417347_at	275	0.00118287		N-acetylglucosamine 6-phosphate
1425215_at	302	0.00118341		phenol sulfate
1452349_x_at	283	0.00118383		nicotinamide
1449592_at	225	0.00118548		inositol 1-phosphate (I1P)
1427213_at	65	0.00118602		2-oleoylglycerophosphocholine*
1424626_at	311	0.00118648		phosphate
1427345_a_at	100	0.00118735		adenosine 5'diphosphoribose
1417765_a_at	276	0.0011881		N-acetylmethionine
1448925_at	199	0.00118844		glycerol 2-phosphate
1418003_at	96	0.00118862		adenine
1451054_at	255	0.00118961		mannitol
1417933_at	36	0.00119135		1-palmitoylglycerophosphoethanolamine
1451689_a_at	26	0.00119335		1-oleoylglycerol (1-monoolein)
1423500_a_at	69	0.00119431		2-palmitoylglycerol (2-monopalmitin)
1424626_at	283	0.00119618		nicotinamide
1425108_a_at	66	0.00119689		2-oleoylglycerophosphoethanolamine*
1448499_a_at	50	0.00119701		2'-deoxycytidine
1422678_at	9	0.00119867		1-arachidonoylglycerophosphocholine (20:4n6)*
1450884_at	305	0.00119869		phenylalanine
1438511_a_at	45	0.00119945		2-aminoadipate
1425809_at	150	0.00119958		cytidine
1418197_at	352	0.00119965		threonylleucine
1425416_s_at	100	0.00120069		adenosine 5'diphosphoribose
1437171_x_at	275	0.00120247		N-acetylglucosamine 6-phosphate
1421766_at	18	0.00120292		1-hexadecanol
1417686_at	290	0.00120391		ornithine
1426319_at	287	0.00120395		oleate (18:1n9)
1420664_s_at	111	0.00120467		alpha-tocopherol
1449528_at	80	0.00120486		3-ureidopropionate
1419764_at	117	0.00120706		arginine
1449592_at	282	0.00120766		N-glycolylneuraminate
1419314_at	32	0.00120795		1-oleoylplasmenylethanolamine*
1417318_at	350	0.0012117		threonate
1449145_a_at	18	0.00121189		1-hexadecanol
1421327_at	18	0.00121353		1-hexadecanol
1416630_at	66	0.00121408		2-oleoylglycerophosphoethanolamine*
1431805_a_at	238	0.00121415		lactose
1451371_at	230	0.00121483		isoleucine
1421058_at	66	0.00121494		2-oleoylglycerophosphoethanolamine*
1450922_a_at	85	0.00121598		5-methyltetrahydrofolate (5MeTHF)
1422677_at	39	0.00121634		1-stearoylglycerol (1-monostearin)
1422602_a_at	316	0.00121639		proline
1421571_a_at	284	0.0012166		nicotinamide adenine dinucleotide (NAD+)
1425216_at	357	0.00121702		trans-4-hydroxyproline
1424155_at	355	0.00121741		thymidine
1450639_at	131	0.00121805		campesterol
1415812_at	201	0.00121902		glycerophosphorylcholine (GPC)
1448842_at	225	0.00122036		inositol 1-phosphate (I1P)
1424266_s_at	65	0.00122098		2-oleoylglycerophosphocholine*
1424155_at	150	0.00122178		cytidine
1419721_at	200	0.00122206		glycerol 3-phosphate (G3P)
1418094_s_at	326	0.00122221		ribose
1436170_a_at	127	0.00122305		beta-sitosterol
1417445_at	132	0.00122571		caprate (10:0)
1417318_at	118	0.00122601		ascorbate (Vitamin C)
1448730_at	360	0.00122765		tyrosine
1424815_at	139	0.00122813		cholesterol
1417686_at	299	0.00122813		pelargonate (9:0)
1451511_at	60	0.00122965		2-hydroxystearate
1424556_at	68	0.00123294		2-oleoylglycerophosphoserine*
1418782_at	276	0.00123311		N-acetylmethionine
1416749_at	37	0.00123429		1-palmitoylglycerophosphoinositol*
1450344_a_at	326	0.00123543		ribose
1416318_at	290	0.00123661		ornithine
1417979_at	197	0.00123743		glycerate
1425145_at	140	0.00123872		choline
1450677_at	327	0.00123941		ribulose
1424357_at	373	0.00124063		xylitol
1418848_at	138	0.00124112		cholestanol
1426869_at	88	0.00124114		5-oxoproline
1421564_at	131	0.00124235		campesterol
1424404_at	274	0.00124363		N-acetyl-aspartyl-glutamate (NAAG)
1427183_at	180	0.00124368		gamma-glutamylglutamate
1425869_a_at	43	0.00124464		1-stearoylglycerophosphoserine*
1417347_at	274	0.00124468		N-acetyl-aspartyl-glutamate (NAAG)
1420712_a_at	34	0.00124524		1-palmitoylglycerol (1-monopalmitin)
1416936_at	156	0.0012455		deoxycarnitine
1419663_at	225	0.00124558		inositol 1-phosphate (I1P)
1423439_at	160	0.00124599		dimethylarginine (SDMA + ADMA)
1439373_x_at	174	0.0012465		fructose-6-phosphate
1423280_at	183	0.00124807		gamma-glutamylmethionine
1438954_x_at	282	0.00124936		N-glycolylneuraminate
1419373_at	177	0.00124939		galactose
1416639_at	201	0.00124989		glycerophosphorylcholine (GPC)
1425626_at	87	0.00125006		5-methyluridine (ribothymidine)
1417358_s_at	274	0.00125413		N-acetyl-aspartyl-glutamate (NAAG)
1422678_at	255	0.00125617		mannitol
1422677_at	360	0.00125675		tyrosine
1421571_a_at	66	0.00125741		2-oleoylglycerophosphoethanolamine*
1420722_at	125	0.00125744		beta-alanine
1448251_at	18	0.00125893		1-hexadecanol
1450974_at	290	0.00125923		ornithine
1425809_at	355	0.00126018		thymidine
1453677_a_at	166	0.00126062		equol sulfate
1417686_at	225	0.00126105		inositol 1-phosphate (I1P)
1426005_at	67	0.00126281		2-oleoylglycerophosphoinositol*
1416992_at	11	0.00126295		1-arachidonoylglycerophosphoinositol*
1416432_at	131	0.00126512		campesterol
1420654_a_at	358	0.00126563		trans-urocanate
1416778_at	80	0.00126641		3-ureidopropionate
1424308_at	316	0.00126642		proline
1427183_at	283	0.00126657		nicotinamide
1422678_at	305	0.00126726		phenylalanine
1425369_a_at	275	0.00126762		N-acetylglucosamine 6-phosphate
1417347_at	9	0.00126885		1-arachidonoylglycerophosphocholine (20:4n6)*
1423250_a_at	85	0.00126886		5-methyltetrahydrofolate (5MeTHF)
1424308_at	290	0.00126943		ornithine
1418003_at	86	0.00127187		5-methylthioadenosine (MTA)
1416211_a_at	161	0.00127188		docosahexaenoate (DHA; 22:6n3)
1416124_at	151	0.00127285		cytidine 5'-diphosphocholine
1451371_at	299	0.00127337		pelargonate (9:0)
1450344_a_at	170	0.0012737		erythronate*
1422678_at	39	0.00127387		1-stearoylglycerol (1-monostearin)
1418472_at	186	0.00127819		gamma-glutamyltryptophan
1416664_at	154	0.00127865		cytidine-5'-diphosphoethanolamine
1448859_at	125	0.00127948		beta-alanine
1448949_at	199	0.00127971		glycerol 2-phosphate
1423891_at	147	0.00127994		cysteine
1427492_at	36	0.00128011		1-palmitoylglycerophosphoethanolamine
1436737_a_at	274	0.00128062		N-acetyl-aspartyl-glutamate (NAAG)
1423489_at	282	0.00128073		N-glycolylneuraminate
1450883_a_at	96	0.0012811		adenine
1419570_at	259	0.00128223		mead acid (20:3n9)
1451593_at	63	0.00128326		2-linoleoylglycerophosphoethanolamine*
1419136_at	176	0.00128462		fumarate
1453851_a_at	158	0.00128642		dihomo-linolenate (20:3n3 or n6)
1416629_at	127	0.00128652		beta-sitosterol
1436991_x_at	274	0.00128741		N-acetyl-aspartyl-glutamate (NAAG)
1452348_s_at	324	0.00128785		ribitol
1432538_a_at	132	0.00128801		caprate (10:0)
1420654_a_at	202	0.00128802		glycine
1427749_at	158	0.00128866		dihomo-linolenate (20:3n3 or n6)
1455802_x_at	238	0.00128907		lactose
1418243_at	225	0.00128968		inositol 1-phosphate (I1P)
1418194_at	152	0.00129095		cytidine 5'-monophosphate (5'-CMP)
1449038_at	9	0.00129149		1-arachidonoylglycerophosphocholine (20:4n6)*
1436737_a_at	9	0.00129173		1-arachidonoylglycerophosphocholine (20:4n6)*
1452253_at	54	0.00129204		2-docosahexaenoylglycerophosphocholine*
1423614_at	181	0.00129285		gamma-glutamylisoleucine*
1417639_at	360	0.001293		tyrosine
1450923_at	137	0.00129304		chiro-inositol
1416639_at	305	0.00129414		phenylalanine
1425784_a_at	127	0.0012947		beta-sitosterol
1423084_at	274	0.00129522		N-acetyl-aspartyl-glutamate (NAAG)
1421093_at	39	0.00129663		1-stearoylglycerol (1-monostearin)
1453851_a_at	165	0.00129742		eicosenoate (20:1n9 or 11)
1422552_at	269	0.00129776		N1-methylguanosine
1449147_at	275	0.00129954		N-acetylglucosamine 6-phosphate
1420981_a_at	85	0.00129962		5-methyltetrahydrofolate (5MeTHF)
1424509_at	28	0.00130012		1-oleoylglycerophosphoethanolamine
1424842_a_at	135	0.00130069		catechol sulfate
1448949_at	13	0.00130147		1-docosahexaenoylglycerophosphocholine (22:6n3)*
1420444_at	86	0.00130258		5-methylthioadenosine (MTA)
1460042_at	103	0.00130339		AICA ribonucleotide
1421571_a_at	171	0.00130505		ethanolamine
1425216_at	304	0.00130559		phenylacetylglycine
1455901_at	212	0.00130612		hippurate
1424357_at	368	0.00130628		valine
1449158_at	225	0.00130692		inositol 1-phosphate (I1P)
1427164_at	253	0.00130721		maltose
1449396_at	299	0.00130749		pelargonate (9:0)
1451537_at	269	0.00130786		N1-methylguanosine
1428781_at	44	0.00130807		1-stearoylplasmenylethanolamine*
1417639_at	125	0.00130883		beta-alanine
1416639_at	104	0.00130905		alanine
1420011_s_at	161	0.00130922		docosahexaenoate (DHA; 22:6n3)
[truncated: 18,904 more rows]

## Sheet: Met-Met Raw Data
	metname1	metname2	pvalue			metabolite 1	metabolite 2	pvalue
1	83	270	3.43e-48			1,5-anhydroglucitol (1,5-AG)	10-heptadecenoate (17:1n7)	3.43e-48
2	351	371	2.35e-06			4-hydroxyphenylpyruvate	N2,N5-diacetylornithine	2.35e-06
3	74	107	4.38e-06			threonine	xanthine	4.38e-06
4	305	368	4.4e-06			3-dehydrocarnitine*	alanylphenylalanine	4.4e-06
5	240	305	6.77e-06			phenylalanine	valine	6.77e-06
6	360	368	9.13e-06			leucine	phenylalanine	9.13e-06
7	240	360	9.23e-06			tyrosine	valine	9.23e-06
8	237	279	9.78e-06			leucine	tyrosine	9.78e-06
9	240	368	1.13e-05			lactate	N-acetylthreonine	1.13e-05
10	9	199	1.21e-05			leucine	valine	1.21e-05
11	176	351	1.36e-05			1-arachidonoylglycerophosphocholine (20:4n6)*	glycerol 2-phosphate	1.36e-05
12	243	334	1.45e-05			fumarate	threonine	1.45e-05
13	359	360	1.79e-05			leucylglycine	serylphenyalanine	1.79e-05
14	191	359	1.89e-05			tryptophan	tyrosine	1.89e-05
15	201	324	2.06e-05			glutamate	tryptophan	2.06e-05
16	208	320	2.09e-05			glycerophosphorylcholine (GPC)	ribitol	2.09e-05
17	122	322	2.21e-05			gulono-1,4-lactone	prostaglandin E2	2.21e-05
18	180	324	2.5e-05			aspartylleucine	putrescine	2.5e-05
19	171	284	2.58e-05			gamma-glutamylglutamate	ribitol	2.58e-05
20	305	360	2.66e-05			ethanolamine	nicotinamide adenine dinucleotide (NAD+)	2.66e-05
21	138	199	2.66e-05			phenylalanine	tyrosine	2.66e-05
22	106	234	2.8e-05			cholestanol	glycerol 2-phosphate	2.8e-05
23	176	190	2.88e-05			alanylleucine	isoleucylthreonine	2.88e-05
24	106	194	3.14e-05			fumarate	glucose-6-phosphate (G6P)	3.14e-05
25	237	239	3.32e-05			alanylleucine	glutamine-leucine	3.32e-05
26	45	257	3.67e-05			lactate	laurate (12:0)	3.67e-05
27	54	339	3.84e-05			2-aminoadipate	mannose-6-phosphate	3.84e-05
28	52	289	3.93e-05			2-docosahexaenoylglycerophosphocholine*	sphingosine	3.93e-05
29	91	203	4.05e-05			2'-deoxyguanosine	ophthalmate	4.05e-05
30	94	331	4.05e-05			7-beta-hydroxycholesterol	glycylisoleucine	4.05e-05
31	180	283	4.17e-05			acetylphosphate	sedoheptulose-7-phosphate	4.17e-05
32	240	359	4.4e-05			gamma-glutamylglutamate	nicotinamide	4.4e-05
33	186	187	4.41e-05			leucine	tryptophan	4.41e-05
34	201	364	4.44e-05			gamma-glutamyltryptophan	gamma-glutamyltyrosine	4.44e-05
35	191	230	4.89e-05			glycerophosphorylcholine (GPC)	urea	4.89e-05
36	86	329	4.9e-05			glutamate	isoleucine	4.9e-05
37	180	201	4.97e-05			5-methylthioadenosine (MTA)	sarcosine (N-Methylglycine)	4.97e-05
38	202	260	4.99e-05			gamma-glutamylglutamate	glycerophosphorylcholine (GPC)	4.99e-05
39	176	371	5.06e-05			glycine	methionine	5.06e-05
40	185	365	5.25e-05			fumarate	xanthine	5.25e-05
41	190	257	5.38e-05			gamma-glutamylthreonine*	uridine	5.38e-05
42	163	177	5.83e-05			glucose-6-phosphate (G6P)	mannose-6-phosphate	5.83e-05
43	48	260	6.22e-05			docosapentaenoate (n6 DPA; 22:5n6)	galactose	6.22e-05
44	176	257	6.45e-05			2-arachidonoylglycerophosphoethanolamine*	methionine	6.45e-05
45	324	364	6.49e-05			fumarate	mannose-6-phosphate	6.49e-05
46	202	371	6.66e-05			ribitol	urea	6.66e-05
47	60	329	6.86e-05			glycine	xanthine	6.86e-05
48	96	272	7.68e-05			2-hydroxystearate	sarcosine (N-Methylglycine)	7.68e-05
49	239	279	7.93e-05			adenine	N-acetylalanine	7.93e-05
50	188	365	7.98e-05			laurate (12:0)	N-acetylthreonine	7.98e-05
51	216	272	8.4e-05			gamma-glutamylvaline	uridine	8.4e-05
52	6	221	8.63e-05			homoserine	N-acetylalanine	8.63e-05
53	190	351	8.78e-05			15-HETE	hypoxanthine	8.78e-05
54	359	368	9.14e-05			glucose-6-phosphate (G6P)	threonine	9.14e-05
55	48	104	9.19e-05			tryptophan	valine	9.19e-05
56	191	360	9.22e-05			2-arachidonoylglycerophosphoethanolamine*	alanine	9.22e-05
57	179	187	9.33e-05			glutamate	tyrosine	9.33e-05
58	325	332	9.4e-05			gamma-glutamylalanine	gamma-glutamyltyrosine	9.4e-05
59	230	359	9.61e-05			riboflavin (Vitamin B2)	serine	9.61e-05
60	271	357	9.84e-05			isoleucine	tryptophan	9.84e-05
61	202	362	9.96e-05			N6-acetyllysine	trans-4-hydroxyproline	9.96e-05
62	311	325	0.000102041			glycine	uracil	0.000102041
63	60	86	0.000102435			phosphate	riboflavin (Vitamin B2)	0.000102435
64	59	314	0.000104685			2-hydroxystearate	5-methylthioadenosine (MTA)	0.000104685
65	9	138	0.000105608			2-hydroxypalmitate	pipecolate	0.000105608
66	86	373	0.000111797			1-arachidonoylglycerophosphocholine (20:4n6)*	cholestanol	0.000111797
67	283	324	0.000111968			5-methylthioadenosine (MTA)	xylitol	0.000111968
68	96	121	0.000117996			nicotinamide	ribitol	0.000117996
69	192	321	0.000120477			adenine	aspartate	0.000120477
70	201	283	0.000121556			glutamate, gamma-methyl ester	pseudouridine	0.000121556
71	174	358	0.000123819			glycerophosphorylcholine (GPC)	nicotinamide	0.000123819
72	260	362	0.000125519			fructose-6-phosphate	trans-urocanate	0.000125519
73	45	136	0.000125645			methionine	uracil	0.000125645
74	39	304	0.000126559			2-aminoadipate	C-glycosyltryptophan*	0.000126559
75	329	373	0.00012777			1-stearoylglycerol (1-monostearin)	phenylacetylglycine	0.00012777
76	194	234	0.000129499			sarcosine (N-Methylglycine)	xylitol	0.000129499
77	243	322	0.000130395			glutamine-leucine	isoleucylthreonine	0.000130395
78	48	202	0.000130509			leucylglycine	putrescine	0.000130509
79	45	214	0.000131568			2-arachidonoylglycerophosphoethanolamine*	glycine	0.000131568
80	48	368	0.000132912			2-aminoadipate	histidine	0.000132912
81	202	351	0.000135656			2-arachidonoylglycerophosphoethanolamine*	valine	0.000135656
82	290	299	0.000136622			glycine	threonine	0.000136622
83	305	359	0.000138874			ornithine	pelargonate (9:0)	0.000138874
84	107	242	0.000139136			phenylalanine	tryptophan	0.000139136
85	230	360	0.000139623			alanylphenylalanine	leucylglutamate	0.000139623
86	104	362	0.000143562			isoleucine	tyrosine	0.000143562
87	104	260	0.000147307			alanine	uracil	0.000147307
88	191	240	0.000153433			alanine	methionine	0.000153433
89	74	242	0.000153481			glutamate	leucine	0.000153481
90	245	246	0.000154763			3-dehydrocarnitine*	leucylglutamate	0.000154763
91	10	373	0.00015663			leucylserine	leucylthreonine	0.00015663
92	121	174	0.000159026			1-arachidonoylglycerophosphoethanolamine*	xylitol	0.000159026
93	202	368	0.000159726			aspartate	fructose-6-phosphate	0.000159726
94	322	334	0.000160318			glycine	valine	0.000160318
95	174	176	0.000164955			putrescine	serylphenyalanine	0.000164955
96	11	139	0.000165163			fructose-6-phosphate	fumarate	0.000165163
97	104	192	0.000165419			1-arachidonoylglycerophosphoinositol*	cholesterol	0.000165419
98	48	305	0.000165464			alanine	glutamate, gamma-methyl ester	0.000165464
99	122	243	0.000166286			2-arachidonoylglycerophosphoethanolamine*	phenylalanine	0.000166286
100	257	351	0.000169429			aspartylleucine	leucylglycine	0.000169429
101	174	271	0.000171531			mannose-6-phosphate	threonine	0.000171531
102	171	274	0.000171929			fructose-6-phosphate	N6-acetyllysine	0.000171929
103	35	72	0.000173058			ethanolamine	N-acetyl-aspartyl-glutamate (NAAG)	0.000173058
104	99	355	0.00017522			1-palmitoylglycerophosphocholine (16:0)	2-stearoylglycerophosphocholine*	0.00017522
105	60	216	0.00017647			adenosine 3'-monophosphate (3'-AMP)	thymidine	0.00017647
106	190	371	0.000176721			2-hydroxystearate	homoserine	0.000176721
107	316	362	0.000177396			glucose-6-phosphate (G6P)	xanthine	0.000177396
108	74	309	0.000178749			proline	uracil	0.000178749
109	104	371	0.000182512			3-dehydrocarnitine*	phenylalanylserine	0.000182512
110	83	310	0.000185563			alanine	xanthine	0.000185563
111	270	310	0.000185563			4-hydroxyphenylpyruvate	phenyllactate (PLA)	0.000185563
112	201	264	0.000186588			N2,N5-diacetylornithine	phenyllactate (PLA)	0.000186588
113	66	166	0.000187659			glycerophosphorylcholine (GPC)	methylphosphate	0.000187659
114	21	40	0.000188055			2-oleoylglycerophosphoethanolamine*	equol sulfate	0.000188055
115	13	304	0.00019263			1-linoleoylglycerophosphocholine (18:2n6)	1-stearoylglycerophosphocholine (18:0)	0.00019263
116	125	325	0.000193633			1-docosahexaenoylglycerophosphocholine (22:6n3)*	phenylacetylglycine	0.000193633
117	48	371	0.000194209			beta-alanine	riboflavin (Vitamin B2)	0.000194209
118	104	331	0.000194602			2-arachidonoylglycerophosphoethanolamine*	xanthine	0.000194602
119	89	208	0.000196218			alanine	sedoheptulose-7-phosphate	0.000196218
120	192	331	0.000200931			6-keto prostaglandin F1alpha	gulono-1,4-lactone	0.000200931
121	174	190	0.000203112			glutamate, gamma-methyl ester	sedoheptulose-7-phosphate	0.000203112
122	180	364	0.000203972			fructose-6-phosphate	glucose-6-phosphate (G6P)	0.000203972
123	202	360	0.000205081			gamma-glutamylglutamate	urea	0.000205081
124	264	324	0.000206004			glycine	tyrosine	0.000206004
125	100	290	0.000209557			methylphosphate	ribitol	0.000209557
126	218	314	0.000210758			adenosine 5'diphosphoribose	ornithine	0.000210758
127	119	190	0.00021136			hydroxybutyrylcarnitine*	pipecolate	0.00021136
128	104	202	0.000211498			asparagine	glucose-6-phosphate (G6P)	0.000211498
129	11	39	0.000215117			alanine	glycine	0.000215117
130	279	316	0.000216065			1-arachidonoylglycerophosphoinositol*	1-stearoylglycerol (1-monostearin)	0.000216065
131	257	368	0.000220821			N-acetylthreonine	proline	0.000220821
132	240	276	0.000222662			mannose-6-phosphate	valine	0.000222662
133	102	152	0.000225737			leucine	N-acetylmethionine	0.000225737
134	351	368	0.000225791			adrenate (22:4n6)	cytidine 5'-monophosphate (5'-CMP)	0.000225791
135	134	212	0.000228015			threonine	valine	0.000228015
136	102	111	0.00022931			carnosine	hippurate	0.00022931
137	368	371	0.000233596			adrenate (22:4n6)	alpha-tocopherol	0.000233596
138	139	173	0.000234713			valine	xanthine	0.000234713
139	85	137	0.000237606			cholesterol	fructose	0.000237606
140	13	326	0.000239416			5-methyltetrahydrofolate (5MeTHF)	chiro-inositol	0.000239416
141	46	248	0.000240649			1-docosahexaenoylglycerophosphocholine (22:6n3)*	ribose	0.000240649
142	251	358	0.000241598			2-aminobutyrate	lignocerate (24:0)	0.000241598
143	107	309	0.000241836			lysine	trans-urocanate	0.000241836
144	102	127	0.000242514			alanylphenylalanine	phenylalanylserine	0.000242514
145	48	351	0.000244914			adrenate (22:4n6)	beta-sitosterol	0.000244914
146	119	359	0.000247633			2-arachidonoylglycerophosphoethanolamine*	threonine	0.000247633
147	240	257	0.00025047			asparagine	tryptophan	0.00025047
148	199	283	0.000252154			leucine	mannose-6-phosphate	0.000252154
149	26	36	0.000253157			glycerol 2-phosphate	nicotinamide	0.000253157
150	150	355	0.000253796			1-oleoylglycerol (1-monoolein)	1-palmitoylglycerophosphoethanolamine	0.000253796
151	244	369	0.000256917			cytidine	thymidine	0.000256917
152	64	235	0.000257165			leucylmethionine	valylphenylalanine	0.000257165
153	276	305	0.000260504			2-methylbutyrylcarnitine (C5)	isovalerylcarnitine	0.000260504
154	86	121	0.000267113			N-acetylmethionine	phenylalanine	0.000267113
155	362	371	0.000272032			5-methylthioadenosine (MTA)	aspartate	0.000272032
156	257	360	0.000273754			uracil	xanthine	0.000273754
157	260	311	0.000275203			mannose-6-phosphate	tyrosine	0.000275203
158	104	351	0.000275867			methionine	phosphate	0.000275867
159	118	178	0.000278841			alanine	threonine	0.000278841
160	88	179	0.000281828			ascorbate (Vitamin C)	gamma-aminobutyrate (GABA)	0.000281828
161	88	187	0.000282417			5-oxoproline	gamma-glutamylalanine	0.000282417
162	191	368	0.000282875			5-oxoproline	gamma-glutamyltyrosine	0.000282875
163	257	359	0.000284465			glutamate	valine	0.000284465
164	48	331	0.000287077			mannose-6-phosphate	tryptophan	0.000287077
165	260	368	0.000287789			2-arachidonoylglycerophosphoethanolamine*	sedoheptulose-7-phosphate	0.000287789
166	48	192	0.000288178			methionine	valine	0.000288178
167	357	371	0.000291955			2-arachidonoylglycerophosphoethanolamine*	glutamate, gamma-methyl ester	0.000291955
168	60	373	0.00029205			trans-4-hydroxyproline	xanthine	0.00029205
169	175	264	0.000292698			2-hydroxystearate	xylitol	0.000292698
170	139	260	0.000293252			fucose	methylphosphate	0.000293252
171	218	233	0.00029333			cholesterol	methionine	0.00029333
172	181	186	0.000298452			hydroxybutyrylcarnitine*	isoleucylglycine	0.000298452
173	237	316	0.00030103			gamma-glutamylisoleucine*	gamma-glutamyltryptophan	0.00030103
174	202	305	0.000301125			lactate	proline	0.000301125
175	257	371	0.000301986			glycine	phenylalanine	0.000301986
176	71	138	0.000302226			mannose-6-phosphate	xanthine	0.000302226
177	264	364	0.000303355			2-palmitoylglycerophosphoethanolamine*	cholestanol	0.000303355
178	45	190	0.000303992			methylphosphate	urea	0.000303992
179	276	360	0.000304936			2-aminoadipate	glucose-6-phosphate (G6P)	0.000304936
180	96	271	0.000305552			N-acetylmethionine	tyrosine	0.000305552
181	191	276	0.00030569			adenine	N6-acetyllysine	0.00030569
182	194	334	0.00030808			glutamate	N-acetylmethionine	0.00030808
183	100	225	0.000308497			glutamine-leucine	serylphenyalanine	0.000308497
184	351	360	0.000309288			adenosine 5'diphosphoribose	inositol 1-phosphate (I1P)	0.000309288
185	31	65	0.000311123			threonine	tyrosine	0.000311123
186	173	311	0.00031182			1-oleoylglycerophosphoserine	2-oleoylglycerophosphocholine*	0.00031182
187	260	371	0.000313097			fructose	phosphate	0.000313097
188	100	131	0.000316963			methionine	xanthine	0.000316963
189	257	305	0.000317573			adenosine 5'diphosphoribose	campesterol	0.000317573
190	9	283	0.000317808			mannose-6-phosphate	phenylalanine	0.000317808
191	218	252	0.000318754			1-arachidonoylglycerophosphocholine (20:4n6)*	nicotinamide	0.000318754
192	212	302	0.00031928			hydroxybutyrylcarnitine*	malate	0.00031928
193	136	160	0.00031965			hippurate	phenol sulfate	0.00031965
194	107	194	0.000320898			C-glycosyltryptophan*	dimethylarginine (SDMA + ADMA)	0.000320898
195	360	371	0.000321286			alanylphenylalanine	glutamine-leucine	0.000321286
196	136	257	0.000321985			tyrosine	xanthine	0.000321985
197	174	351	0.000322568			C-glycosyltryptophan*	mannose-6-phosphate	0.000322568
198	126	220	0.000323131			fructose-6-phosphate	threonine	0.000323131
199	14	46	0.000323483			betaine	hypotaurine	0.000323483
200	297	363	0.000325003			1-docosahexaenoylglycerophosphoethanolamine*	2-aminobutyrate	0.000325003
201	125	264	0.000325214			pantothenate	urate	0.000325214
202	122	334	0.000328368			beta-alanine	methylphosphate	0.000328368
203	191	305	0.000336146			aspartylleucine	serylphenyalanine	0.000336146
204	119	191	0.000338094			glutamate	phenylalanine	0.000338094
205	230	240	0.000338157			asparagine	glutamate	0.000338157
206	48	311	0.000338224			isoleucine	leucine	0.000338224
207	11	304	0.000339936			2-arachidonoylglycerophosphoethanolamine*	phosphate	0.000339936
208	176	368	0.000340574			1-arachidonoylglycerophosphoinositol*	phenylacetylglycine	0.000340574
209	48	360	0.000340692			fumarate	valine	0.000340692
210	131	138	0.000343584			2-arachidonoylglycerophosphoethanolamine*	tyrosine	0.000343584
211	216	329	0.000349909			campesterol	cholestanol	0.000349909
212	230	368	0.000350181			homoserine	sarcosine (N-Methylglycine)	0.000350181
213	175	372	0.00035054			isoleucine	valine	0.00035054
214	208	224	0.000355643			fucose	xanthosine	0.000355643
215	218	342	0.000356995			gulono-1,4-lactone	inosine 5'-monophosphate (IMP)	0.000356995
216	357	362	0.000358157			hydroxybutyrylcarnitine*	stearidonate (18:4n3)	0.000358157
217	190	359	0.000359571			trans-4-hydroxyproline	uracil	0.000359571
218	48	240	0.000361842			glucose-6-phosphate (G6P)	tryptophan	0.000361842
219	194	243	0.000363015			2-arachidonoylglycerophosphoethanolamine*	leucine	0.000363015
220	45	176	0.000365536			glutamine-leucine	leucylglycine	0.000365536
221	131	139	0.000366477			2-aminoadipate	fumarate	0.000366477
222	260	305	0.000366846			campesterol	cholesterol	0.000366846
223	119	295	0.000367088			methionine	phenylalanine	0.000367088
224	10	329	0.000372456			asparagine	palmitoyl sphingomyelin	0.000372456
225	351	357	0.000376158			1-arachidonoylglycerophosphoethanolamine*	sarcosine (N-Methylglycine)	0.000376158
226	131	225	0.00038354			threonine	trans-4-hydroxyproline	0.00038354
227	304	326	0.000388982			campesterol	inositol 1-phosphate (I1P)	0.000388982
228	176	331	0.000390615			phenylacetylglycine	ribose	0.000390615
229	202	230	0.000391019			fumarate	sedoheptulose-7-phosphate	0.000391019
230	45	240	0.00039109			glycine	isoleucine	0.00039109
231	179	186	0.0003935			2-aminoadipate	leucine	0.0003935
232	105	128	0.000397077			gamma-glutamylalanine	gamma-glutamyltryptophan	0.000397077
233	276	368	0.000401625			alanylalanine	bilirubin (Z,Z)	0.000401625
234	168	169	0.000402276			N-acetylmethionine	valine	0.000402276
235	176	202	0.000407272			erucate (22:1n9)	erythritol	0.000407272
236	32	335	0.000407382			fumarate	glycine	0.000407382
237	276	359	0.000407914			1-oleoylplasmenylethanolamine*	sorbitol	0.000407914
238	205	355	0.000408267			N-acetylmethionine	tryptophan	0.000408267
239	202	240	0.000410092			glycylproline	thymidine	0.000410092
240	48	362	0.000411219			glycine	leucine	0.000411219
241	331	351	0.000412125			2-arachidonoylglycerophosphoethanolamine*	uracil	0.000412125
242	246	333	0.000415149			sedoheptulose-7-phosphate	threonine	0.000415149
243	190	360	0.000416998			leucylthreonine	serylleucine	0.000416998
244	139	202	0.000422297			glucose-6-phosphate (G6P)	tyrosine	0.000422297
245	185	188	0.000424222			cholesterol	glycine	0.000424222
246	230	295	0.000426158			gamma-glutamylthreonine*	gamma-glutamylvaline	0.000426158
247	170	304	0.000427312			isoleucine	palmitoyl sphingomyelin	0.000427312
248	122	333	0.000428411			erythronate*	phenylacetylglycine	0.000428411
249	119	230	0.00042967			aspartylleucine	serylleucine	0.00042967
250	224	320	0.00043227			asparagine	isoleucine	0.00043227
251	305	351	0.00043405			inosine 5'-monophosphate (IMP)	prostaglandin E2	0.00043405
252	118	200	0.000434471			phenylalanine	threonine	0.000434471
253	40	308	0.00043507			ascorbate (Vitamin C)	glycerol 3-phosphate (G3P)	0.00043507
254	37	166	0.00043568			1-stearoylglycerophosphocholine (18:0)	phenylalanylglycine	0.00043568
255	214	257	0.00043817			1-palmitoylglycerophosphoinositol*	equol sulfate	0.00043817
256	96	216	0.00043841			histidine	mannose-6-phosphate	0.00043841
257	237	302	0.000439163			adenine	homoserine	0.000439163
258	190	368	0.00044123			lactate	phenol sulfate	0.00044123
259	180	199	0.000443615			glucose-6-phosphate (G6P)	valine	0.000443615
260	176	360	0.000445269			gamma-glutamylglutamate	glycerol 2-phosphate	0.000445269
261	48	176	0.000445476			fumarate	tyrosine	0.000445476
262	180	200	0.00044752			2-arachidonoylglycerophosphoethanolamine*	fumarate	0.00044752
263	305	371	0.000449831			gamma-glutamylglutamate	glycerol 3-phosphate (G3P)	0.000449831
264	231	353	0.000450153			phenylalanine	xanthine	0.000450153
265	331	371	0.000450459			isoleucylalanine	threonylphenylalanine	0.000450459
266	245	333	0.000452386			sedoheptulose-7-phosphate	xanthine	0.000452386
267	264	283	0.000454255			leucylserine	serylleucine	0.000454255
268	173	260	0.000458528			methylphosphate	nicotinamide	0.000458528
269	260	360	0.000459207			fructose	methionine	0.000459207
270	121	190	0.000459589			methionine	tyrosine	0.000459589
271	174	371	0.000459957			aspartate	glucose-6-phosphate (G6P)	0.000459957
272	160	359	0.000462893			fructose-6-phosphate	xanthine	0.000462893
273	11	316	0.00046494			dimethylarginine (SDMA + ADMA)	tryptophan	0.00046494
274	39	299	0.000465114			1-arachidonoylglycerophosphoinositol*	proline	0.000465114
275	9	131	0.000466808			1-stearoylglycerol (1-monostearin)	pelargonate (9:0)	0.000466808
276	86	216	0.000467653			1-arachidonoylglycerophosphocholine (20:4n6)*	campesterol	0.000467653
277	121	271	0.000467852			5-methylthioadenosine (MTA)	homoserine	0.000467852
278	179	184	0.000472818			aspartate	N6-acetyllysine	0.000472818
279	314	342	0.000473133			gamma-glutamylalanine	gamma-glutamylphenylalanine	0.000473133
280	351	362	0.000474447			pipecolate	stearidonate (18:4n3)	0.000474447
281	174	357	0.000475738			threonine	uracil	0.000475738
282	260	351	0.000476775			fructose-6-phosphate	trans-4-hydroxyproline	0.000476775
283	184	187	0.000479077			methionine	threonine	0.000479077
284	199	201	0.000479375			gamma-glutamylphenylalanine	gamma-glutamyltyrosine	0.000479375
285	45	368	0.000480847			glycerol 2-phosphate	glycerophosphorylcholine (GPC)	0.000480847
286	240	351	0.000481164			2-aminoadipate	valine	0.000481164
287	202	359	0.000483811			leucine	threonine	0.000483811
288	59	252	0.000487904			glycine	tryptophan	0.000487904
289	252	314	0.000488469			2-hydroxypalmitate	malate	0.000488469
290	150	205	0.000488562			malate	pipecolate	0.000488562
291	322	333	0.00048954			cytidine	glycylproline	0.00048954
292	21	308	0.00048957			putrescine	serylleucine	0.00048957
293	351	359	0.000490031			1-linoleoylglycerophosphocholine (18:2n6)	phenylalanylglycine	0.000490031
294	214	332	0.000491304			threonine	tryptophan	0.000491304
295	169	215	0.000493383			histidine	serine	0.000493383
296	212	237	0.000496292			erythritol	homocysteine	0.000496292
297	104	357	0.000496362			hippurate	lactate	0.000496362
298	125	311	0.000497949			alanine	trans-4-hydroxyproline	0.000497949
299	106	107	0.000499673			beta-alanine	phosphate	0.000499673
300	230	305	0.000499997			alanylleucine	alanylphenylalanine	0.000499997
301	160	191	0.000501776			isoleucine	phenylalanine	0.000501776
302	45	305	0.000505549			dimethylarginine (SDMA + ADMA)	glutamate	0.000505549
303	119	257	0.000507692			2-aminoadipate	phenylalanine	0.000507692
304	65	71	0.000508164			asparagine	mannose-6-phosphate	0.000508164
305	94	192	0.000510602			2-oleoylglycerophosphocholine*	2-palmitoylglycerophosphoethanolamine*	0.000510602
306	229	235	0.00051277			acetylphosphate	glutamate, gamma-methyl ester	0.00051277
307	86	96	0.000522719			isobutyrylcarnitine	isovalerylcarnitine	0.000522719
308	11	170	0.000526109			5-methylthioadenosine (MTA)	adenine	0.000526109
309	321	331	0.00052676			1-arachidonoylglycerophosphoinositol*	erythronate*	0.00052676
310	45	359	0.000527955			pseudouridine	sedoheptulose-7-phosphate	0.000527955
311	11	173	0.000528313			2-aminoadipate	tryptophan	0.000528313
312	45	160	0.000528892			1-arachidonoylglycerophosphoinositol*	fructose	0.000528892
313	108	326	0.00052944			2-aminoadipate	dimethylarginine (SDMA + ADMA)	0.00052944
314	240	371	0.000530681			allantoin	ribose	0.000530681
315	219	234	0.000535422			leucine	xanthine	0.000535422
316	239	316	0.00053562			hydroxyisovaleroyl carnitine	isoleucylthreonine	0.00053562
317	59	342	0.000538087			laurate (12:0)	proline	0.000538087
318	274	284	0.00053874			2-hydroxypalmitate	stearidonate (18:4n3)	0.00053874
319	104	176	0.000538914			N-acetyl-aspartyl-glutamate (NAAG)	nicotinamide adenine dinucleotide (NAD+)	0.000538914
320	121	358	0.000542213			alanine	fumarate	0.000542213
321	94	321	0.000542733			aspartate	trans-urocanate	0.000542733
322	191	295	0.000542967			acetylphosphate	pseudouridine	0.000542967
323	194	242	0.000542967			glutamate	palmitoyl sphingomyelin	0.000542967
324	178	350	0.00054672			glutamine-leucine	leucylglutamate	0.00054672
325	131	199	0.000547049			gamma-aminobutyrate (GABA)	threonate	0.000547049
326	283	364	0.000547871			campesterol	glycerol 2-phosphate	0.000547871
327	96	174	0.000549265			nicotinamide	urea	0.000549265
328	311	332	0.00055116			adenine	fructose-6-phosphate	0.00055116
329	139	230	0.000551343			phosphate	serine	0.000551343
330	180	264	0.000551613			cholesterol	isoleucine	0.000551613
331	359	371	0.000554031			gamma-glutamylglutamate	methylphosphate	0.000554031
332	212	239	0.000554118			tryptophan	xanthine	0.000554118
333	279	302	0.000554718			hippurate	laurate (12:0)	0.000554718
334	200	324	0.000558321			N-acetylthreonine	phenol sulfate	0.000558321
335	39	290	0.000560975			glycerol 3-phosphate (G3P)	ribitol	0.000560975
336	319	343	0.000564249			1-stearoylglycerol (1-monostearin)	ornithine	0.000564249
337	34	127	0.000566461			prostaglandin D2	stearoyl sphingomyelin	0.000566461
338	335	356	0.000566796			1-palmitoylglycerol (1-monopalmitin)	beta-sitosterol	0.000566796
339	190	240	0.000567218			sorbitol	thymine	0.000567218
340	98	214	0.000569169			glucose-6-phosphate (G6P)	leucine	0.000569169
341	176	305	0.000569326			adenosine 2'-monophosphate (2'-AMP)	histidine	0.000569326
342	176	359	0.000570416			fumarate	phenylalanine	0.000570416
343	305	332	0.000570661			fumarate	tryptophan	0.000570661
344	45	360	0.000570761			phenylalanine	serine	0.000570761
345	176	240	0.000572808			2-aminoadipate	tyrosine	0.000572808
346	230	276	0.000573801			fumarate	leucine	0.000573801
347	109	234	0.000575692			isoleucine	N-acetylmethionine	0.000575692
348	233	252	0.000577225			alpha-glutamyltyrosine	isoleucylthreonine	0.000577225
349	119	360	0.000578444			isoleucylglycine	malate	0.000578444
350	136	190	0.000580219			asparagine	tyrosine	0.000580219
351	174	257	0.000584575			C-glycosyltryptophan*	glucose-6-phosphate (G6P)	0.000584575
352	118	350	0.000585134			fructose-6-phosphate	mannose-6-phosphate	0.000585134
353	74	194	0.000587931			ascorbate (Vitamin C)	threonate	0.000587931
354	9	180	0.000588265			3-dehydrocarnitine*	glutamine-leucine	0.000588265
355	168	215	0.000588274			1-arachidonoylglycerophosphocholine (20:4n6)*	gamma-glutamylglutamate	0.000588274
356	106	219	0.000589504			erucate (22:1n9)	homocysteine	0.000589504
357	125	283	0.000590006			alanylleucine	hydroxyisovaleroyl carnitine	0.000590006
358	11	131	0.000592142			beta-alanine	nicotinamide	0.000592142
359	121	272	0.000594743			1-arachidonoylglycerophosphoinositol*	campesterol	0.000594743
360	89	320	0.000595814			aspartate	N-acetylalanine	0.000595814
361	176	357	0.000596364			6-keto prostaglandin F1alpha	prostaglandin E2	0.000596364
362	181	187	0.000597835			fumarate	trans-4-hydroxyproline	0.000597835
363	103	254	0.000602692			gamma-glutamylisoleucine*	gamma-glutamyltyrosine	0.000602692
364	192	260	0.000602722			AICA ribonucleotide	maltotriose	0.000602722
365	238	269	0.000605601			glutamate, gamma-methyl ester	methionine	0.000605601
366	139	276	0.000608349			lactose	N1-methylguanosine	0.000608349
367	109	340	0.000613136			cholesterol	N-acetylmethionine	0.000613136
368	138	173	0.000613888			alpha-glutamyltyrosine	stachydrine	0.000613888
369	134	239	0.000614701			cholestanol	fructose	0.000614701
370	48	325	0.000615253			carnosine	laurate (12:0)	0.000615253
371	214	240	0.000617607			2-arachidonoylglycerophosphoethanolamine*	riboflavin (Vitamin B2)	0.000617607
372	125	324	0.000618064			histidine	leucine	0.000618064
373	77	92	0.000619499			beta-alanine	ribitol	0.000619499
374	192	311	0.000620073			3-indoxyl sulfate	9,10-DiHOME	0.000620073
375	214	305	0.000620369			glutamate, gamma-methyl ester	phosphate	0.000620369
376	219	333	0.000624878			histidine	phenylalanine	0.000624878
377	318	336	0.000625359			hydroxyisovaleroyl carnitine	serylleucine	0.000625359
378	48	257	0.000626808			prostaglandin A2	spermidine	0.000626808
379	240	260	0.000628182			2-arachidonoylglycerophosphoethanolamine*	mannose-6-phosphate	0.000628182
380	309	353	0.000629561			leucine	methionine	0.000629561
381	9	276	0.00063308			phenylalanylserine	threonylphenylalanine	0.00063308
382	170	326	0.000640732			1-arachidonoylglycerophosphocholine (20:4n6)*	N-acetylmethionine	0.000640732
383	42	290	0.000640996			erythronate*	ribose	0.000640996
384	252	342	0.000641496			1-stearoylglycerophosphoinositol	ornithine	0.000641496
385	283	311	0.000645372			malate	stearidonate (18:4n3)	0.000645372
386	127	152	0.000650732			nicotinamide	phosphate	0.000650732
387	182	365	0.000652983			beta-sitosterol	cytidine 5'-monophosphate (5'-CMP)	0.000652983
388	44	46	0.000656762			gamma-glutamylleucine	uridine	0.000656762
389	27	33	0.00065725			1-stearoylplasmenylethanolamine*	2-aminobutyrate	0.00065725
390	190	202	0.000658004			1-oleoylglycerophosphocholine (18:1)	1-palmitoleoylglycerophosphocholine (16:1)*	0.000658004
391	11	362	0.000659651			glucose-6-phosphate (G6P)	glycine	0.000659651
392	39	42	0.000664116			1-arachidonoylglycerophosphoinositol*	uracil	0.000664116
393	170	316	0.000664427			1-stearoylglycerol (1-monostearin)	1-stearoylglycerophosphoinositol	0.000664427
394	48	332	0.000664718			erythronate*	proline	0.000664718
395	202	357	0.000669804			2-arachidonoylglycerophosphoethanolamine*	serine	0.000669804
396	32	279	0.000670425			glycine	trans-4-hydroxyproline	0.000670425
397	45	351	0.000672763			1-oleoylplasmenylethanolamine*	N-acetylthreonine	0.000672763
398	86	272	0.000675584			2-aminoadipate	threonine	0.000675584
399	138	283	0.00067581			5-methylthioadenosine (MTA)	N-acetylalanine	0.00067581
400	316	357	0.000679062			cholestanol	nicotinamide	0.000679062
401	119	176	0.000681366			proline	trans-4-hydroxyproline	0.000681366
402	173	199	0.000682421			asparagine	fumarate	0.000682421
403	114	152	0.000685526			fructose	glycerol 2-phosphate	0.000685526
404	136	214	0.000686265			arabitol	cytidine 5'-monophosphate (5'-CMP)	0.000686265
405	212	279	0.000686359			C-glycosyltryptophan*	histidine	0.000686359
406	104	368	0.000687623			hippurate	N-acetylthreonine	0.000687623
407	160	240	0.000687747			alanine	valine	0.000687747
408	42	299	0.000689714			dimethylarginine (SDMA + ADMA)	leucine	0.000689714
409	9	139	0.000690023			1-stearoylglycerophosphoinositol	pelargonate (9:0)	0.000690023
410	176	358	0.00069069			1-arachidonoylglycerophosphocholine (20:4n6)*	cholesterol	0.00069069
411	175	182	0.000690849			fumarate	trans-urocanate	0.000690849
412	38	316	0.000692151			fucose	gamma-glutamylleucine	0.000692151
413	38	42	0.000692371			1-palmitoylplasmenylethanolamine*	proline	0.000692371
414	272	329	0.000692939			1-palmitoylplasmenylethanolamine*	1-stearoylglycerophosphoinositol	0.000692939
415	60	272	0.000695909			N-acetylalanine	sarcosine (N-Methylglycine)	0.000695909
416	121	329	0.000699267			2-hydroxystearate	N-acetylalanine	0.000699267
417	13	39	0.00069936			aspartate	sarcosine (N-Methylglycine)	0.00069936
418	106	333	0.000701156			1-docosahexaenoylglycerophosphocholine (22:6n3)*	1-stearoylglycerol (1-monostearin)	0.000701156
419	3	7	0.00070132			alanylleucine	serylleucine	0.00070132
420	10	295	0.000703801			10-nonadecenoate (19:1n9)	15-methylpalmitate (isobar with 2-methylpalmitate)	0.000703801
421	190	305	0.000712136			1-arachidonoylglycerophosphoethanolamine*	palmitoyl sphingomyelin	0.000712136
422	139	360	0.000712614			glucose-6-phosphate (G6P)	phenylalanine	0.000712614
423	71	111	0.000712652			cholesterol	tyrosine	0.000712652
424	239	362	0.000713864			2-palmitoylglycerophosphoethanolamine*	alpha-tocopherol	0.000713864
425	119	160	0.00071529			laurate (12:0)	uracil	0.00071529
426	94	104	0.000719487			asparagine	dimethylarginine (SDMA + ADMA)	0.000719487
427	192	325	0.000723221			acetylphosphate	alanine	0.000723221
428	119	136	0.000735234			glutamate, gamma-methyl ester	riboflavin (Vitamin B2)	0.000735234
429	71	199	0.00073586			asparagine	C-glycosyltryptophan*	0.00073586
430	246	352	0.000736525			2-palmitoylglycerophosphoethanolamine*	glycerol 2-phosphate	0.000736525
431	271	358	0.000737757			leucylthreonine	threonylleucine	0.000737757
432	139	311	0.000741293			N6-acetyllysine	trans-urocanate	0.000741293
433	305	311	0.000744821			cholesterol	phosphate	0.000744821
434	88	182	0.000747578			phenylalanine	phosphate	0.000747578
435	257	331	0.000747883			5-oxoproline	gamma-glutamylleucine	0.000747883
436	138	201	0.000748433			mannose-6-phosphate	sedoheptulose-7-phosphate	0.000748433
437	154	327	0.000748502			cholestanol	glycerophosphorylcholine (GPC)	0.000748502
438	106	334	0.000750853			cytidine-5'-diphosphoethanolamine	ribulose	0.000750853
439	66	68	0.000752598			alanylleucine	serylphenyalanine	0.000752598
440	77	280	0.000753152			2-oleoylglycerophosphoethanolamine*	2-oleoylglycerophosphoserine*	0.000753152
441	230	371	0.000753237			3-indoxyl sulfate	N-delta-acetylornithine*	0.000753237
442	255	276	0.000754093			isoleucine	xanthine	0.000754093
443	88	184	0.000755281			mannitol	N-acetylmethionine	0.000755281
444	88	372	0.000756254			5-oxoproline	gamma-glutamylphenylalanine	0.000756254
445	202	316	0.000757119			5-oxoproline	xanthosine	0.000757119
446	134	280	0.000757717			glycine	proline	0.000757717
447	18	282	0.000759561			carnosine	N-delta-acetylornithine*	0.000759561
448	271	351	0.000761607			1-hexadecanol	N-glycolylneuraminate	0.000761607
449	176	271	0.000763281			N6-acetyllysine	threonine	0.000763281
450	191	257	0.000771323			fumarate	N6-acetyllysine	0.000771323
451	11	260	0.00077161			glutamate	mannose-6-phosphate	0.00077161
452	10	86	0.000772268			1-arachidonoylglycerophosphoinositol*	methionine	0.000772268
453	182	188	0.000775561			1-arachidonoylglycerophosphoethanolamine*	5-methylthioadenosine (MTA)	0.000775561
454	76	272	0.000776165			gamma-glutamylleucine	gamma-glutamylvaline	0.000776165
455	139	368	0.000776597			3-hydroxybutyrate (BHBA)	N-acetylalanine	0.000776597
456	202	257	0.000777582			cholesterol	valine	0.000777582
457	119	351	0.000777841			glycine	mannose-6-phosphate	0.000777841
458	190	358	0.00077798			asparagine	threonine	0.00077798
459	121	176	0.000778732			glucose-6-phosphate (G6P)	trans-urocanate	0.000778732
460	271	371	0.000780139			aspartate	fumarate	0.000780139
461	88	186	0.000780857			N6-acetyllysine	xanthine	0.000780857
462	89	224	0.000780943			5-oxoproline	gamma-glutamyltryptophan	0.000780943
463	14	44	0.000782885			6-keto prostaglandin F1alpha	inosine 5'-monophosphate (IMP)	0.000782885
464	139	362	0.000783108			1-docosahexaenoylglycerophosphoethanolamine*	1-stearoylplasmenylethanolamine*	0.000783108
465	139	199	0.000783367			cholesterol	uracil	0.000783367
466	167	241	0.000784269			cholesterol	glycerol 2-phosphate	0.000784269
467	74	369	0.000789639			ergothioneine	leucylalanine	0.000789639
468	138	139	0.000790886			3-dehydrocarnitine*	valylphenylalanine	0.000790886
469	283	325	0.000792197			cholestanol	cholesterol	0.000792197
470	76	96	0.00079354			nicotinamide	riboflavin (Vitamin B2)	0.00079354
471	32	302	0.00079399			3-hydroxybutyrate (BHBA)	adenine	0.00079399
472	119	121	0.00079939			1-oleoylplasmenylethanolamine*	phenol sulfate	0.00079939
473	214	368	0.000801231			asparagine	aspartate	0.000801231
474	191	202	0.000801683			histidine	valine	0.000801683
475	279	362	0.000804789			glutamate	glycine	0.000804789
476	11	202	0.000806611			N-acetylthreonine	uracil	0.000806611
477	94	176	0.000814131			1-arachidonoylglycerophosphoinositol*	glycine	0.000814131
478	43	51	0.000816619			acetylphosphate	fumarate	0.000816619
479	230	351	0.000817223			1-stearoylglycerophosphoserine*	2'-deoxycytidine 3'-monophosphate	0.000817223
480	139	305	0.000819013			isoleucine	threonine	0.000819013
481	59	218	0.000825425			cholesterol	phenylalanine	0.000825425
482	274	364	0.000827474			2-hydroxypalmitate	hydroxybutyrylcarnitine*	0.000827474
483	190	191	0.000830192			N-acetyl-aspartyl-glutamate (NAAG)	urea	0.000830192
484	125	175	0.000831187			glucose-6-phosphate (G6P)	glutamate	0.000831187
485	9	201	0.000833825			beta-alanine	fucose	0.000833825
486	96	357	0.000836167			1-arachidonoylglycerophosphocholine (20:4n6)*	glycerophosphorylcholine (GPC)	0.000836167
487	119	240	0.000836782			adenine	trans-4-hydroxyproline	0.000836782
488	170	173	0.000839304			asparagine	leucine	0.000839304
489	9	275	0.000841614			erythronate*	fructose	0.000841614
490	160	257	0.000842123			1-arachidonoylglycerophosphocholine (20:4n6)*	N-acetylglucosamine 6-phosphate	0.000842123
491	48	359	0.00084428			dimethylarginine (SDMA + ADMA)	mannose-6-phosphate	0.00084428
492	106	242	0.000849733			2-arachidonoylglycerophosphoethanolamine*	tryptophan	0.000849733
493	95	275	0.000851971			alanylleucine	leucylglutamate	0.000851971
494	170	237	0.000852352			Ac-Ser-Asp-Lys-Pro-OH	N-acetylglucosamine 6-phosphate	0.000852352
495	74	353	0.000858643			erythronate*	lactate	0.000858643
496	125	332	0.000860588			3-dehydrocarnitine*	threonylphenylalanine	0.000860588
497	104	311	0.000862715			beta-alanine	serine	0.000862715
498	199	324	0.000864411			alanine	phosphate	0.000864411
499	237	362	0.000867672			glycerol 2-phosphate	ribitol	0.000867672
500	74	106	0.000874901			lactate	uracil	0.000874901
501	190	230	0.000876671			3-dehydrocarnitine*	alanylleucine	0.000876671
502	96	329	0.000877273			glucose-6-phosphate (G6P)	isoleucine	0.000877273
503	177	184	0.000878061			adenine	sarcosine (N-Methylglycine)	0.000878061
504	332	368	0.00087887			galactose	gamma-glutamylphenylalanine	0.00087887
505	194	333	0.000890153			serine	valine	0.000890153
506	106	243	0.000891119			glutamine-leucine	serylleucine	0.000891119
507	279	357	0.000893576			alanylleucine	leucylglycine	0.000893576
508	240	332	0.000896546			N-acetylthreonine	trans-4-hydroxyproline	0.000896546
509	38	279	0.000900299			leucine	serine	0.000900299
510	235	268	0.000901673			1-palmitoylplasmenylethanolamine*	N-acetylthreonine	0.000901673
511	295	359	0.00090306			isovalerylcarnitine	N1-methyladenosine	0.00090306
512	104	305	0.000904638			palmitoyl sphingomyelin	tryptophan	0.000904638
513	58	222	0.000905248			alanine	phenylalanine	0.000905248
514	160	360	0.000905557			2-hydroxyglutarate	indolelactate	0.000905557
515	293	330	0.000907977			dimethylarginine (SDMA + ADMA)	tyrosine	0.000907977
516	217	231	0.000912908			palmitoleate (16:1n7)	scyllo-inositol	0.000912908
517	311	368	0.000917093			homostachydrine*	isoleucylalanine	0.000917093
518	45	119	0.000917567			phosphate	valine	0.000917567
519	39	131	0.000926063			2-aminoadipate	asparagine	0.000926063
520	305	325	0.000926618			1-stearoylglycerol (1-monostearin)	campesterol	0.000926618
521	111	127	0.000933034			phenylalanine	riboflavin (Vitamin B2)	0.000933034
522	194	219	0.000934698			alpha-tocopherol	beta-sitosterol	0.000934698
523	9	173	0.000936399			glutamine-leucine	hydroxyisovaleroyl carnitine	0.000936399
524	119	368	0.000938553			1-arachidonoylglycerophosphocholine (20:4n6)*	fructose	0.000938553
525	353	369	0.000939468			asparagine	valine	0.000939468
526	107	234	0.000942327			threonylphenylalanine	valylphenylalanine	0.000942327
527	26	61	0.000943386			alanylphenylalanine	isoleucylthreonine	0.000943386
528	48	139	0.000943896			1-oleoylglycerol (1-monoolein)	2-linoleoylglycerol (2-monolinolein)	0.000943896
529	137	147	0.000949437			2-arachidonoylglycerophosphoethanolamine*	cholesterol	0.000949437
530	109	194	0.000950302			chiro-inositol	cysteine	0.000950302
531	260	331	0.000952764			alpha-glutamyltyrosine	glutamine-leucine	0.000952764
532	138	180	0.000953884			methionine	sedoheptulose-7-phosphate	0.000953884
533	333	352	0.000955104			cholestanol	gamma-glutamylglutamate	0.000955104
534	242	243	0.000955519			serylleucine	threonylleucine	0.000955519
535	230	260	0.000955557			leucylglutamate	leucylglycine	0.000955557
536	119	329	0.000956221			isoleucine	methionine	0.000956221
537	232	336	0.000956834			asparagine	sarcosine (N-Methylglycine)	0.000956834
538	10	60	0.000957954			isoleucylaspartate	spermidine	0.000957954
539	119	371	0.000958181			1-arachidonoylglycerophosphoethanolamine*	2-hydroxystearate	0.000958181
540	362	368	0.000961569			asparagine	xanthine	0.000961569
541	48	190	0.000963258			uracil	valine	0.000963258
542	202	311	0.000963435			2-arachidonoylglycerophosphoethanolamine*	glucose-6-phosphate (G6P)	0.000963435
543	176	260	0.000966601			glycine	phosphate	0.000966601
544	218	315	0.000968267			fumarate	methionine	0.000968267
545	45	371	0.000969122			hydroxybutyrylcarnitine*	pro-hydroxy-pro	0.000969122
546	199	275	0.000970468			2-aminoadipate	xanthine	0.000970468
547	243	333	0.000976484			glycerol 2-phosphate	N-acetylglucosamine 6-phosphate	0.000976484
548	125	180	0.00097833			leucylglycine	serylleucine	0.00097833
549	10	119	0.00098174			beta-alanine	gamma-glutamylglutamate	0.00098174
550	202	331	0.00098486			1-arachidonoylglycerophosphoethanolamine*	asparagine	0.00098486
551	48	94	0.000984999			glycine	sedoheptulose-7-phosphate	0.000984999
552	190	357	0.000987407			2-arachidonoylglycerophosphoethanolamine*	acetylphosphate	0.000987407
553	331	368	0.00098847			glucose-6-phosphate (G6P)	trans-4-hydroxyproline	0.00098847
554	260	325	0.000990812			sedoheptulose-7-phosphate	valine	0.000990812
555	139	240	0.000993058			methionine	riboflavin (Vitamin B2)	0.000993058
556	260	316	0.000994018			cholesterol	leucine	0.000994018
557	264	311	0.000994147			methionine	proline	0.000994147
558	125	201	0.00099531			methylphosphate	phosphate	0.00099531
559	178	200	0.000996004			beta-alanine	glycerophosphorylcholine (GPC)	0.000996004
560	4	153	0.000996079			gamma-aminobutyrate (GABA)	glycerol 3-phosphate (G3P)	0.000996079
561	160	214	0.000998034			12-HETE	cytidine-3'-monophosphate (3'-CMP)	0.000998034
562	217	306	0.000999049			dimethylarginine (SDMA + ADMA)	histidine	0.000999049
563	173	283	0.00100015			homostachydrine*	phenylalanylalanine	0.00100015
564	233	315	0.00100171			fructose	nicotinamide	0.00100171
565	135	212	0.0010026			isoleucylglycine	pro-hydroxy-pro	0.0010026
566	174	331	0.00100503			catechol sulfate	hippurate	0.00100503
567	104	321	0.00100592			fructose-6-phosphate	sedoheptulose-7-phosphate	0.00100592
568	71	201	0.00100773			alanine	pseudouridine	0.00100773
569	239	357	0.00101656			2-palmitoylglycerophosphoethanolamine*	glycerophosphorylcholine (GPC)	0.00101656
570	200	283	0.00101792			laurate (12:0)	trans-4-hydroxyproline	0.00101792
571	219	322	0.00101946			glycerol 3-phosphate (G3P)	nicotinamide	0.00101946
572	309	369	0.00102088			hydroxyisovaleroyl carnitine	putrescine	0.00102088
573	271	272	0.00102641			phenylalanylserine	valylphenylalanine	0.00102641
574	119	373	0.0010272			N6-acetyllysine	N-acetylalanine	0.0010272
575	194	322	0.00102803			asparagine	xylitol	0.00102803
576	94	351	0.00102822			glutamine-leucine	putrescine	0.00102822
577	136	359	0.00102951			acetylphosphate	threonine	0.00102951
578	176	362	0.00103118			C-glycosyltryptophan*	tryptophan	0.00103118
579	86	119	0.00103217			fumarate	uracil	0.00103217
580	239	302	0.00103609			5-methylthioadenosine (MTA)	asparagine	0.00103609
581	60	96	0.00103647			laurate (12:0)	phenol sulfate	0.00103647
582	192	362	0.0010377			2-hydroxystearate	adenine	0.0010377
583	88	365	0.00104258			glutamate, gamma-methyl ester	uracil	0.00104258
584	32	237	0.0010459			5-oxoproline	uridine	0.0010459
585	233	342	0.00104602			1-oleoylplasmenylethanolamine*	lactate	0.00104602
586	190	271	0.00104778			isoleucylglycine	stearidonate (18:4n3)	0.00104778
587	260	359	0.00104833			glucose-6-phosphate (G6P)	N6-acetyllysine	0.00104833
588	136	176	0.00104918			methionine	tryptophan	0.00104918
589	100	230	0.00105297			C-glycosyltryptophan*	fumarate	0.00105297
590	125	182	0.00105321			adenosine 5'diphosphoribose	isoleucine	0.00105321
591	131	290	0.00105394			beta-alanine	gamma-glutamylleucine	0.00105394
592	32	212	0.00105547			campesterol	ornithine	0.00105547
593	95	200	0.00106047			1-oleoylplasmenylethanolamine*	hippurate	0.00106047
594	134	237	0.00106085			Ac-Ser-Asp-Lys-Pro-OH	glycerol 3-phosphate (G3P)	0.00106085
595	191	351	0.00106188			carnosine	lactate	0.00106188
596	125	178	0.00106254			glutamate	threonine	0.00106254
597	121	351	0.00106599			beta-alanine	gamma-aminobutyrate (GABA)	0.00106599
598	100	299	0.00107127			aspartate	threonine	0.00107127
599	139	191	0.00107425			adenosine 5'diphosphoribose	pelargonate (9:0)	0.00107425
600	121	373	0.00107612			cholesterol	glutamate	0.00107612
601	225	290	0.00107787			aspartate	xylitol	0.00107787
602	39	316	0.00107923			inositol 1-phosphate (I1P)	ornithine	0.00107923
603	12	27	0.0010793			1-stearoylglycerol (1-monostearin)	proline	0.0010793
604	46	59	0.00108179			1-dihomo-linoleoylglycerophosphocholine (20:2n6)*	1-oleoylglycerophosphocholine (18:1)	0.00108179
605	190	331	0.00108667			2-aminobutyrate	2-hydroxypalmitate	0.00108667
606	95	255	0.00108713			glucose-6-phosphate (G6P)	sedoheptulose-7-phosphate	0.00108713
607	214	360	0.00109167			Ac-Ser-Asp-Lys-Pro-OH	mannitol	0.00109167
608	99	373	0.00109345			histidine	tyrosine	0.00109345
609	290	295	0.00109595			adenosine 3'-monophosphate (3'-AMP)	xylitol	0.00109595
610	107	353	0.00109937			ornithine	palmitoyl sphingomyelin	0.00109937
611	32	38	0.00110056			alanylphenylalanine	threonylphenylalanine	0.00110056
612	92	280	0.00110139			1-oleoylplasmenylethanolamine*	1-palmitoylplasmenylethanolamine*	0.00110139
613	182	186	0.00110246			9,10-DiHOME	N-delta-acetylornithine*	0.00110246
614	234	334	0.00110286			gamma-glutamylleucine	gamma-glutamyltryptophan	0.00110286
615	180	275	0.00110344			isoleucylthreonine	serylphenyalanine	0.00110344
616	127	171	0.00110351			gamma-glutamylglutamate	N-acetylglucosamine 6-phosphate	0.00110351
617	173	362	0.00110365			beta-sitosterol	ethanolamine	0.00110365
618	257	358	0.0011045			fructose	uracil	0.0011045
619	219	334	0.00110498			mannose-6-phosphate	trans-urocanate	0.00110498
620	104	360	0.00110652			hydroxyisovaleroyl carnitine	serylphenyalanine	0.00110652
621	230	257	0.00111138			alanine	tyrosine	0.00111138
622	191	371	0.00111143			isoleucine	mannose-6-phosphate	0.00111143
623	9	95	0.00111164			glutamate	xanthine	0.00111164
624	200	364	0.00111375			1-arachidonoylglycerophosphocholine (20:4n6)*	Ac-Ser-Asp-Lys-Pro-OH	0.00111375
625	121	357	0.00111434			glycerol 3-phosphate (G3P)	urea	0.00111434
626	45	191	0.00112231			aspartate	trans-4-hydroxyproline	0.00112231
627	179	188	0.00112783			2-aminoadipate	glutamate	0.00112783
628	44	59	0.00112885			gamma-glutamylalanine	gamma-glutamylvaline	0.00112885
629	65	111	0.00113197			1-stearoylplasmenylethanolamine*	2-hydroxypalmitate	0.00113197
630	106	109	0.00113582			2-oleoylglycerophosphocholine*	alpha-tocopherol	0.00113582
631	95	180	0.00113597			alanylleucine	alpha-glutamyltyrosine	0.00113597
632	94	358	0.00113739			Ac-Ser-Asp-Lys-Pro-OH	gamma-glutamylglutamate	0.00113739
633	333	334	0.00113817			acetylphosphate	trans-urocanate	0.00113817
634	60	121	0.0011389			serylleucine	serylphenyalanine	0.0011389
635	182	187	0.00114032			2-hydroxystearate	aspartate	0.00114032
636	192	371	0.00114174			gamma-glutamylleucine	gamma-glutamyltyrosine	0.00114174
637	95	283	0.00114285			glutamate, gamma-methyl ester	xanthine	0.00114285
638	192	332	0.00114309			Ac-Ser-Asp-Lys-Pro-OH	nicotinamide	0.00114309
639	11	230	0.00114496			glutamate, gamma-methyl ester	serine	0.00114496
640	121	216	0.00114797			1-arachidonoylglycerophosphoinositol*	isoleucine	0.00114797
641	200	201	0.0011497			aspartate	homoserine	0.0011497
642	315	342	0.00115264			glycerol 3-phosphate (G3P)	glycerophosphorylcholine (GPC)	0.00115264
643	305	331	0.00115478			pro-hydroxy-pro	stearidonate (18:4n3)	0.00115478
644	179	182	0.00115508			phenylalanine	sedoheptulose-7-phosphate	0.00115508
645	179	365	0.00116011			gamma-glutamylalanine	gamma-glutamylleucine	0.00116011
646	199	276	0.00116064			gamma-glutamylalanine	uridine	0.00116064
647	331	357	0.00116305			glycerol 2-phosphate	N-acetylmethionine	0.00116305
648	360	362	0.00116461			sedoheptulose-7-phosphate	trans-4-hydroxyproline	0.00116461
649	99	150	0.00117001			tyrosine	uracil	0.00117001
650	45	48	0.00117027			adenosine 3'-monophosphate (3'-AMP)	cytidine	0.00117027
651	94	371	0.00117128			2-aminoadipate	2-arachidonoylglycerophosphoethanolamine*	0.00117128
652	111	116	0.00117201			acetylphosphate	xanthine	0.00117201
653	160	305	0.00117426			alpha-tocopherol	arachidonate (20:4n6)	0.00117426
654	145	245	0.00118258			dimethylarginine (SDMA + ADMA)	phenylalanine	0.00118258
655	173	264	0.00118312			creatine	leucylserine	0.00118312
656	91	206	0.00118316			fructose	methylphosphate	0.00118316
657	139	359	0.0011839			7-beta-hydroxycholesterol	guanosine	0.0011839
658	192	202	0.00118541			cholesterol	tryptophan	0.00118541
659	295	329	0.00118958			glutamate, gamma-methyl ester	glycine	0.00118958
660	176	230	0.00119458			palmitoyl sphingomyelin	sarcosine (N-Methylglycine)	0.00119458
661	104	316	0.00119796			fumarate	isoleucine	0.00119796
662	100	255	0.00120132			alanine	proline	0.00120132
663	71	173	0.00120294			adenosine 5'diphosphoribose	mannitol	0.00120294
664	94	174	0.00120507			2-palmitoylglycerophosphoethanolamine*	fructose	0.00120507
665	173	202	0.00120519			acetylphosphate	fructose-6-phosphate	0.00120519
666	39	139	0.00120545			fructose	glycine	0.00120545
667	211	263	0.00120888			1-stearoylglycerol (1-monostearin)	cholesterol	0.00120888
668	45	331	0.00120889			hexanoylcarnitine	methyl-beta-glucopyranoside	0.00120889
669	9	324	0.00121053			2-aminoadipate	sedoheptulose-7-phosphate	0.00121053
670	131	173	0.00121112			1-arachidonoylglycerophosphocholine (20:4n6)*	ribitol	0.00121112
671	119	174	0.00121416			campesterol	fructose	0.00121416
672	122	194	0.00121951			asparagine	fructose-6-phosphate	0.00121951
673	28	37	0.00122477			aspartylleucine	glutamine-leucine	0.00122477
674	39	170	0.00122624			1-oleoylglycerophosphoethanolamine	1-palmitoylglycerophosphoinositol*	0.00122624
675	95	276	0.00122679			1-stearoylglycerol (1-monostearin)	erythronate*	0.00122679
676	64	241	0.00123067			Ac-Ser-Asp-Lys-Pro-OH	N-acetylmethionine	0.00123067
677	38	39	0.00123115			2-methylbutyrylcarnitine (C5)	leucylalanine	0.00123115
678	170	279	0.00123286			1-palmitoylplasmenylethanolamine*	1-stearoylglycerol (1-monostearin)	0.00123286
679	141	268	0.00123331			erythronate*	N-acetylthreonine	0.00123331
680	260	276	0.00123938			choline phosphate	N1-methyladenosine	0.00123938
681	160	368	0.00124194			methionine	N-acetylmethionine	0.00124194
682	104	257	0.00124863			dimethylarginine (SDMA + ADMA)	valine	0.00124863
683	331	362	0.00124939			alanine	mannose-6-phosphate	0.00124939
684	111	152	0.00125176			sedoheptulose-7-phosphate	uracil	0.00125176
685	104	239	0.00125681			alpha-tocopherol	cytidine 5'-monophosphate (5'-CMP)	0.00125681
686	214	359	0.00125741			alanine	laurate (12:0)	0.00125741
687	136	240	0.00125804			histidine	tryptophan	0.00125804
688	176	191	0.00125956			C-glycosyltryptophan*	leucine	0.00125956
689	355	373	0.00126091			fumarate	glutamate	0.00126091
690	94	257	0.00126234			thymidine	xylitol	0.00126234
691	202	276	0.00126408			acetylphosphate	mannose-6-phosphate	0.00126408
692	351	358	0.00126438			glycine	N-acetylmethionine	0.00126438
693	45	174	0.00126457			threonine	trans-urocanate	0.00126457
694	135	302	0.00126749			2-aminoadipate	fructose-6-phosphate	0.00126749
695	276	311	0.00126863			catechol sulfate	phenol sulfate	0.00126863
696	54	70	0.00126896			N-acetylmethionine	phosphate	0.00126896
697	325	368	0.00127138			2-docosahexaenoylglycerophosphocholine*	2-palmitoylglycerophosphocholine*	0.00127138
698	240	311	0.00127214			riboflavin (Vitamin B2)	valine	0.00127214
699	174	251	0.00127462			leucine	phosphate	0.00127462
700	246	350	0.00127704			fructose-6-phosphate	lysine	0.00127704
701	107	369	0.0012823			leucylthreonine	threonate	0.0012823
702	104	190	0.0012836			alanylphenylalanine	valylphenylalanine	0.0012836
703	170	362	0.00128851			alanine	glucose-6-phosphate (G6P)	0.00128851
704	316	371	0.00128919			erythronate*	uracil	0.00128919
705	170	239	0.00129189			proline	xanthine	0.00129189
706	260	357	0.00129216			erythronate*	laurate (12:0)	0.00129216
707	48	230	0.00129222			methionine	trans-4-hydroxyproline	0.00129222
708	48	173	0.00129288			2-arachidonoylglycerophosphoethanolamine*	isoleucine	0.00129288
709	38	237	0.00129382			2-arachidonoylglycerophosphoethanolamine*	fructose	0.00129382
710	192	351	0.00129422			1-palmitoylplasmenylethanolamine*	lactate	0.00129422
711	119	305	0.00129572			glutamate, gamma-methyl ester	threonine	0.00129572
712	48	276	0.00129609			asparagine	phenylalanine	0.00129609
713	176	214	0.0012971			2-arachidonoylglycerophosphoethanolamine*	N-acetylmethionine	0.0012971
714	127	274	0.00130516			fumarate	histidine	0.00130516
715	184	186	0.00130616			beta-sitosterol	N-acetyl-aspartyl-glutamate (NAAG)	0.00130616
716	264	325	0.00130793			gamma-glutamylphenylalanine	gamma-glutamyltryptophan	0.00130793
717	121	371	0.00130932			methylphosphate	riboflavin (Vitamin B2)	0.00130932
718	237	357	0.00131246			aspartate	xanthine	0.00131246
719	197	273	0.00131249			lactate	trans-4-hydroxyproline	0.00131249
720	319	337	0.00131375			glycerate	N-acetylaspartate (NAA)	0.00131375
721	199	364	0.00131957			prostaglandin D2	spermine	0.00131957
722	76	216	0.00132061			glycerol 2-phosphate	urea	0.00132061
723	131	304	0.00132161			3-hydroxybutyrate (BHBA)	homoserine	0.00132161
724	242	309	0.00132196			campesterol	phenylacetylglycine	0.00132196
725	38	302	0.00132432			leucylglutamate	phenylalanylserine	0.00132432
726	25	27	0.00132435			1-palmitoylplasmenylethanolamine*	phenol sulfate	0.00132435
727	94	251	0.00133046			1-myristoylglycerophosphocholine (14:0)	1-oleoylglycerophosphocholine (18:1)	0.00133046
728	305	362	0.00133101			acetylphosphate	lysine	0.00133101
729	178	182	0.00133139			phenylalanine	uracil	0.00133139
730	63	258	0.00133219			gamma-aminobutyrate (GABA)	gamma-glutamylleucine	0.00133219
731	311	362	0.00133651			2-linoleoylglycerophosphoethanolamine*	margarate (17:0)	0.00133651
732	160	276	0.00133791			phosphate	uracil	0.00133791
733	24	72	0.00134035			dimethylarginine (SDMA + ADMA)	N-acetylmethionine	0.00134035
734	20	26	0.00134201			1-margaroylglycerophosphocholine (17:0)	2-stearoylglycerophosphocholine*	0.00134201
735	104	240	0.00134226			1-linoleoylglycerol (1-monolinolein)	1-oleoylglycerol (1-monoolein)	0.00134226
736	41	42	0.00134688			alanine	leucine	0.00134688
737	135	197	0.00135258			1-stearoylglycerophosphoethanolamine	1-stearoylglycerophosphoinositol	0.00135258
738	48	357	0.00135275			catechol sulfate	glycerate	0.00135275
739	48	214	0.00135476			2-arachidonoylglycerophosphoethanolamine*	trans-4-hydroxyproline	0.00135476
740	131	276	0.00135515			2-arachidonoylglycerophosphoethanolamine*	histidine	0.00135515
741	160	190	0.00135714			campesterol	N-acetylmethionine	0.00135714
742	322	352	0.00135889			dimethylarginine (SDMA + ADMA)	glucose-6-phosphate (G6P)	0.00135889
743	242	333	0.00136047			putrescine	threonylleucine	0.00136047
744	2	287	0.00136133			leucylglutamate	serylleucine	0.00136133
745	9	255	0.00136142			10-heptadecenoate (17:1n7)	oleate (18:1n9)	0.00136142
746	4	319	0.00136438			1-arachidonoylglycerophosphocholine (20:4n6)*	mannitol	0.00136438
747	100	295	0.00136866			12-HETE	prostaglandin D2	0.00136866
748	276	332	0.00137052			adenosine 5'diphosphoribose	palmitoyl sphingomyelin	0.00137052
749	230	362	0.001374			N-acetylmethionine	serine	0.001374
750	331	332	0.0013809			isoleucine	uracil	0.0013809
751	182	264	0.00138196			sedoheptulose-7-phosphate	serine	0.00138196
752	121	257	0.00138267			gamma-glutamylleucine	methylphosphate	0.00138267
753	48	321	0.00138326			aspartate	mannose-6-phosphate	0.00138326
754	350	352	0.00138524			2-arachidonoylglycerophosphoethanolamine*	pseudouridine	0.00138524
755	100	139	0.00138611			threonate	threonylleucine	0.00138611
756	234	333	0.00139093			adenosine 5'diphosphoribose	cholesterol	0.00139093
757	311	360	0.00139599			isoleucylthreonine	serylleucine	0.00139599
758	39	100	0.00139881			phosphate	tyrosine	0.00139881
759	119	202	0.00140003			1-stearoylglycerol (1-monostearin)	adenosine 5'diphosphoribose	0.00140003
760	9	71	0.00140162			asparagine	glycine	0.00140162
761	150	204	0.00140177			1-arachidonoylglycerophosphocholine (20:4n6)*	2-palmitoylglycerophosphoethanolamine*	0.00140177
762	98	352	0.00140225			cytidine	glycylleucine	0.00140225
763	34	152	0.00140234			adenosine 2'-monophosphate (2'-AMP)	threonylleucine	0.00140234
764	199	311	0.00140252			1-palmitoylglycerol (1-monopalmitin)	cytidine 5'-monophosphate (5'-CMP)	0.00140252
765	20	61	0.0014054			glycerol 2-phosphate	phosphate	0.0014054
766	319	354	0.001406			1-linoleoylglycerol (1-monolinolein)	2-linoleoylglycerol (2-monolinolein)	0.001406
767	304	316	0.00140606			prostaglandin D2	thromboxane B2	0.00140606
768	321	325	0.00140676			phenylacetylglycine	proline	0.00140676
769	230	290	0.0014158			pseudouridine	riboflavin (Vitamin B2)	0.0014158
770	42	316	0.00141745			isoleucine	ornithine	0.00141745
771	77	252	0.00142652			1-stearoylglycerophosphoinositol	proline	0.00142652
772	332	360	0.00142749			3-indoxyl sulfate	malate	0.00142749
773	38	335	0.00143308			serine	tyrosine	0.00143308
774	182	372	0.00143522			1-palmitoylplasmenylethanolamine*	sorbitol	0.00143522
775	71	364	0.00143691			gamma-glutamylleucine	xanthosine	0.00143691
776	104	271	0.00143869			2-palmitoylglycerophosphoethanolamine*	urea	0.00143869
777	138	324	0.00144093			alanine	N6-acetyllysine	0.00144093
778	257	260	0.00144157			cholestanol	ribitol	0.00144157
779	139	316	0.0014418			mannose-6-phosphate	methionine	0.0014418
780	173	325	0.00144328			cholesterol	proline	0.00144328
781	138	275	0.00144748			fructose	riboflavin (Vitamin B2)	0.00144748
782	96	190	0.00144801			cholestanol	N-acetylglucosamine 6-phosphate	0.00144801
783	331	358	0.00145666			adenine	glucose-6-phosphate (G6P)	0.00145666
784	9	311	0.00146005			sedoheptulose-7-phosphate	trans-urocanate	0.00146005
785	190	214	0.00146126			1-arachidonoylglycerophosphocholine (20:4n6)*	phosphate	0.00146126
786	276	283	0.00146657			glucose-6-phosphate (G6P)	histidine	0.00146657
787	220	336	0.00146919			N-acetylmethionine	nicotinamide	0.00146919
788	102	116	0.0014702			hypotaurine	spermidine	0.0014702
789	60	355	0.00147039			adrenate (22:4n6)	arachidonate (20:4n6)	0.00147039
790	173	201	0.00147227			2-hydroxystearate	thymidine	0.00147227
791	96	358	0.00147406			fructose	glycerophosphorylcholine (GPC)	0.00147406
792	4	221	0.00147784			adenine	trans-urocanate	0.00147784
793	41	329	0.00147888			12-HETE	hypoxanthine	0.00147888
794	74	234	0.00148132			1-stearoylglycerophosphoethanolamine	sarcosine (N-Methylglycine)	0.00148132
795	104	174	0.00148152			3-dehydrocarnitine*	isoleucylthreonine	0.00148152
796	160	230	0.00148254			alanine	fructose-6-phosphate	0.00148254
797	29	73	0.00148528			dimethylarginine (SDMA + ADMA)	isoleucine	0.00148528
798	100	191	0.00148545			1-oleoylglycerophosphoglycerol*	3-(4-hydroxyphenyl)lactate	0.00148545
799	242	369	0.00148567			adenosine 5'diphosphoribose	glutamate	0.00148567
800	216	373	0.00148721			leucylglutamate	valylphenylalanine	0.00148721
801	11	290	0.0014873			homoserine	xylitol	0.0014873
802	106	322	0.00148911			1-arachidonoylglycerophosphoinositol*	ornithine	0.00148911
803	45	332	0.00148934			alanylleucine	putrescine	0.00148934
804	48	191	0.00149414			2-aminoadipate	serine	0.00149414
805	136	360	0.00149519			2-arachidonoylglycerophosphoethanolamine*	glutamate	0.00149519
806	88	185	0.00149549			C-glycosyltryptophan*	tyrosine	0.00149549
807	260	332	0.00149679			5-oxoproline	gamma-glutamylthreonine*	0.00149679
808	242	334	0.00149692			methionine	serine	0.00149692
809	234	243	0.00149788			leucylglutamate	serylphenyalanine	0.00149788
810	214	331	0.00149935			isoleucylthreonine	leucylglycine	0.00149935
811	191	260	0.00150156			histidine	sedoheptulose-7-phosphate	0.00150156
812	240	325	0.00150675			glutamate	methionine	0.00150675
813	107	243	0.00150986			leucine	riboflavin (Vitamin B2)	0.00150986
814	139	371	0.00151368			alanylphenylalanine	leucylglycine	0.00151368
815	122	242	0.00152213			cholesterol	xanthine	0.00152213
816	45	358	0.00152753			aspartylleucine	leucylglutamate	0.00152753
817	109	334	0.00152871			2-aminoadipate	trans-urocanate	0.00152871
818	131	230	0.00153028			alpha-glutamyltyrosine	serylphenyalanine	0.00153028
819	49	132	0.00153947			campesterol	isoleucine	0.00153947
820	142	347	0.00154296			2'-deoxyadenosine 3'-monophosphate	caprate (10:0)	0.00154296
821	134	279	0.00154428			cis-vaccenate (18:1n7)	taurine	0.00154428
822	292	301	0.00154443			carnosine	N-acetylthreonine	0.00154443
823	13	170	0.0015459			palmitate (16:0)	pentadecanoate (15:0)	0.0015459
824	125	364	0.00154789			1-docosahexaenoylglycerophosphocholine (22:6n3)*	erythronate*	0.00154789
825	41	295	0.00154886			beta-alanine	urea	0.00154886
826	192	368	0.00155183			1-stearoylglycerophosphoethanolamine	palmitoyl sphingomyelin	0.00155183
827	194	309	0.00155335			glutamate, gamma-methyl ester	valine	0.00155335
828	84	159	0.00155434			glutamine-leucine	phenylalanylserine	0.00155434
829	226	309	0.00155506			5-aminovalerate	dihydroxyacetone phosphate (DHAP)	0.00155506
830	42	295	0.00155921			Isobar: betaine aldehyde, N-methyldiethanolamine	phenylalanylserine	0.00155921
831	271	362	0.00156038			1-stearoylglycerophosphoinositol	palmitoyl sphingomyelin	0.00156038
832	37	66	0.00156191			N6-acetyllysine	uracil	0.00156191
833	199	264	0.00156276			1-palmitoylglycerophosphoinositol*	2-oleoylglycerophosphoethanolamine*	0.00156276
834	97	223	0.00156315			glycerol 2-phosphate	methylphosphate	0.00156315
835	219	352	0.0015652			adenosine	inosine	0.0015652
836	104	325	0.0015677			hydroxyisovaleroyl carnitine	threonylleucine	0.0015677
837	284	313	0.00156836			alanine	riboflavin (Vitamin B2)	0.00156836
838	272	357	0.00157818			nicotinamide adenine dinucleotide (NAD+)	phosphoethanolamine	0.00157818
839	299	304	0.00158093			N-acetylalanine	trans-4-hydroxyproline	0.00158093
840	122	352	0.00158165			pelargonate (9:0)	phenylacetylglycine	0.00158165
841	140	181	0.00158297			aspartylleucine	threonylleucine	0.00158297
842	282	299	0.00158656			choline	gamma-glutamylisoleucine*	0.00158656
843	240	331	0.00158908			N-glycolylneuraminate	pelargonate (9:0)	0.00158908
844	174	202	0.00159005			leucine	sedoheptulose-7-phosphate	0.00159005
845	295	360	0.00159197			fructose-6-phosphate	glycine	0.00159197
846	11	138	0.00159401			palmitoyl sphingomyelin	tyrosine	0.00159401
847	232	340	0.0015949			1-arachidonoylglycerophosphoinositol*	cholestanol	0.0015949
848	190	260	0.00160067			isoleucylaspartate	stachydrine	0.00160067
849	86	355	0.00160466			glucose-6-phosphate (G6P)	methionine	0.00160466
850	192	305	0.00160596			5-methylthioadenosine (MTA)	thymidine	0.00160596
851	34	275	0.00160988			glutamate, gamma-methyl ester	phenylalanine	0.00160988
852	136	368	0.00161431			1-palmitoylglycerol (1-monopalmitin)	N-acetylglucosamine 6-phosphate	0.00161431
853	86	174	0.00161519			C-glycosyltryptophan*	valine	0.00161519
854	219	243	0.00161544			5-methylthioadenosine (MTA)	fructose-6-phosphate	0.00161544
855	11	42	0.00161554			hydroxyisovaleroyl carnitine	leucylglycine	0.00161554
856	34	102	0.0016178			1-arachidonoylglycerophosphoinositol*	1-stearoylglycerophosphoinositol	0.0016178
857	12	148	0.00161818			1-palmitoylglycerol (1-monopalmitin)	adrenate (22:4n6)	0.00161818
858	182	185	0.00161851			1-dihomo-linoleoylglycerophosphocholine (20:2n6)*	cysteine-glutathione disulfide	0.00161851
859	271	331	0.00162129			gamma-glutamylleucine	gamma-glutamylthreonine*	0.00162129
860	136	191	0.00162423			N6-acetyllysine	sedoheptulose-7-phosphate	0.00162423
861	331	360	0.00162762			C-glycosyltryptophan*	glutamate	0.00162762
862	191	255	0.00162831			sedoheptulose-7-phosphate	tyrosine	0.00162831
863	139	304	0.00163073			glutamate	mannitol	0.00163073
864	45	94	0.00163536			cholesterol	phenylacetylglycine	0.00163536
865	145	333	0.00164103			2-aminoadipate	acetylphosphate	0.00164103
866	104	139	0.0016446			creatine	serylleucine	0.0016446
867	176	192	0.00164748			alanine	cholesterol	0.00164748
868	45	98	0.00164763			fumarate	glutamate, gamma-methyl ester	0.00164763
869	274	324	0.00165256			2-aminoadipate	adenosine 2'-monophosphate (2'-AMP)	0.00165256
870	225	282	0.00165486			N-acetyl-aspartyl-glutamate (NAAG)	ribitol	0.00165486
871	139	170	0.00165574			inositol 1-phosphate (I1P)	N-glycolylneuraminate	0.00165574
872	201	311	0.00165616			cholesterol	erythronate*	0.00165616
873	276	325	0.00166257			glycerophosphorylcholine (GPC)	phosphate	0.00166257
874	358	371	0.00166597			N-acetylmethionine	riboflavin (Vitamin B2)	0.00166597
875	177	181	0.00167249			trans-urocanate	xanthine	0.00167249
876	138	364	0.00167264			galactose	gamma-glutamylisoleucine*	0.00167264
877	93	233	0.00167982			cholestanol	urea	0.00167982
878	190	362	0.00168291			acetylcarnitine	isoleucylglycine	0.00168291
879	138	225	0.00168331			glucose-6-phosphate (G6P)	uracil	0.00168331
880	32	239	0.00168606			cholestanol	inositol 1-phosphate (I1P)	0.00168606
881	275	283	0.0016898			1-oleoylplasmenylethanolamine*	laurate (12:0)	0.0016898
882	200	274	0.00169239			N-acetylglucosamine 6-phosphate	nicotinamide	0.00169239
883	95	199	0.00169445			glycerol 3-phosphate (G3P)	N-acetyl-aspartyl-glutamate (NAAG)	0.00169445
884	225	299	0.00169503			Ac-Ser-Asp-Lys-Pro-OH	glycerol 2-phosphate	0.00169503
885	140	183	0.00170265			inositol 1-phosphate (I1P)	pelargonate (9:0)	0.00170265
886	180	311	0.00170297			choline	gamma-glutamylmethionine	0.00170297
887	311	324	0.00170577			gamma-glutamylglutamate	phosphate	0.00170577
888	11	100	0.00170753			phosphate	ribitol	0.00170753
889	325	331	0.00170793			1-arachidonoylglycerophosphoinositol*	adenosine 5'diphosphoribose	0.00170793
890	31	61	0.00171129			riboflavin (Vitamin B2)	sedoheptulose-7-phosphate	0.00171129
891	324	325	0.0017127			1-oleoylglycerophosphoserine	2-linoleoylglycerol (2-monolinolein)	0.0017127
892	240	362	0.00171367			ribitol	riboflavin (Vitamin B2)	0.00171367
893	122	219	0.00171834			leucine	uracil	0.00171834
894	127	284	0.00172367			aspartylleucine	hydroxyisovaleroyl carnitine	0.00172367
895	111	364	0.00172517			beta-sitosterol	nicotinamide adenine dinucleotide (NAD+)	0.00172517
896	104	173	0.00172565			alpha-tocopherol	urea	0.00172565
897	175	324	0.00172674			alanine	fructose	0.00172674
898	136	358	0.00172726			fucose	ribitol	0.00172726
899	175	364	0.00172966			C-glycosyltryptophan*	trans-urocanate	0.00172966
900	108	170	0.00173008			fucose	urea	0.00173008
901	283	332	0.00173409			allantoin	erythronate*	0.00173409
902	136	305	0.00173493			nicotinamide	serine	0.00173493
903	257	332	0.00173611			C-glycosyltryptophan*	phenylalanine	0.00173611
904	136	351	0.00173627			mannose-6-phosphate	serine	0.00173627
905	214	351	0.00173838			C-glycosyltryptophan*	threonine	0.00173838
906	45	202	0.00173951			histidine	threonine	0.00173951
907	134	256	0.00174229			2-aminoadipate	glycine	0.00174229
908	136	174	0.00174261			carnosine	mannose	0.00174261
909	71	131	0.00174598			C-glycosyltryptophan*	fructose-6-phosphate	0.00174598
910	86	190	0.00175193			2-palmitoylglycerophosphoethanolamine*	campesterol	0.00175193
911	163	181	0.0017543			5-methylthioadenosine (MTA)	glucose-6-phosphate (G6P)	0.0017543
912	94	190	0.00175589			docosapentaenoate (n6 DPA; 22:5n6)	gamma-glutamylisoleucine*	0.00175589
913	76	271	0.00175676			acetylphosphate	glucose-6-phosphate (G6P)	0.00175676
914	295	373	0.00176078			3-hydroxybutyrate (BHBA)	N6-acetyllysine	0.00176078
915	180	325	0.00176646			palmitoyl sphingomyelin	xylitol	0.00176646
916	139	283	0.00176784			gamma-glutamylglutamate	riboflavin (Vitamin B2)	0.00176784
917	106	122	0.00176898			cholesterol	nicotinamide	0.00176898
918	311	331	0.00177841			alanylleucine	aspartylleucine	0.00177841
919	316	351	0.00178122			phosphate	sedoheptulose-7-phosphate	0.00178122
920	96	176	0.00178319			proline	threonine	0.00178319
921	98	219	0.00178468			adenine	fumarate	0.00178468
922	134	302	0.00178656			adenosine 2'-monophosphate (2'-AMP)	hydroxyisovaleroyl carnitine	0.00178656
923	174	272	0.00179064			carnosine	phenol sulfate	0.00179064
924	175	201	0.00179292			fructose-6-phosphate	N-acetylalanine	0.00179292
925	357	358	0.00179456			fucose	glycerophosphorylcholine (GPC)	0.00179456
926	14	59	0.001797			trans-4-hydroxyproline	trans-urocanate	0.001797
927	181	184	0.00179769			1-docosahexaenoylglycerophosphoethanolamine*	2-hydroxypalmitate	0.00179769
928	214	325	0.00179825			gamma-glutamylisoleucine*	gamma-glutamylphenylalanine	0.00179825
929	100	276	0.00180042			histidine	riboflavin (Vitamin B2)	0.00180042
930	107	334	0.00180552			adenosine 5'diphosphoribose	N-acetylmethionine	0.00180552
931	39	326	0.00180597			alanylphenylalanine	serylphenyalanine	0.00180597
932	38	304	0.00180757			1-stearoylglycerol (1-monostearin)	ribose	0.00180757
933	256	372	0.00181029			1-palmitoylplasmenylethanolamine*	phenylacetylglycine	0.00181029
934	10	41	0.00181132			mannose	xanthosine	0.00181132
935	233	314	0.00181449			1-arachidonoylglycerophosphoethanolamine*	1-stearoylglycerophosphoethanolamine	0.00181449
936	337	354	0.00182036			isoleucylglycine	pipecolate	0.00182036
937	12	25	0.00182776			spermine	thromboxane B2	0.00182776
938	234	242	0.00183048			1-dihomo-linoleoylglycerophosphocholine (20:2n6)*	1-myristoylglycerophosphocholine (14:0)	0.00183048
939	311	321	0.00183138			isoleucylthreonine	leucylglutamate	0.00183138
940	71	264	0.00183197			phosphate	pseudouridine	0.00183197
941	170	302	0.00183593			2-palmitoylglycerophosphoethanolamine*	methylphosphate	0.00183593
942	61	114	0.00183916			erythronate*	phenol sulfate	0.00183916
943	122	246	0.00184028			2-linoleoylglycerol (2-monolinolein)	arabitol	0.00184028
944	179	181	0.0018425			aspartylleucine	leucylthreonine	0.0018425
945	173	304	0.00184669			gamma-glutamylalanine	gamma-glutamylisoleucine*	0.00184669
946	154	374	0.00185029			fructose	phenylacetylglycine	0.00185029
947	185	372	0.00185202			cytidine-5'-diphosphoethanolamine	xylulose	0.00185202
948	308	354	0.00185421			gamma-glutamylthreonine*	xanthosine	0.00185421
949	257	276	0.00185666			phenylalanylglycine	thromboxane B2	0.00185666
950	14	248	0.00186491			mannose-6-phosphate	N-acetylmethionine	0.00186491
951	321	332	0.00186579			1-docosahexaenoylglycerophosphoethanolamine*	lignocerate (24:0)	0.00186579
952	88	188	0.00186922			pseudouridine	serine	0.00186922
953	94	214	0.0018819			5-oxoproline	gamma-glutamylvaline	0.0018819
954	109	232	0.0018838			acetylphosphate	histidine	0.0018838
955	257	357	0.00188525			alpha-glutamyltyrosine	isoleucylaspartate	0.00188525
956	96	351	0.00188674			mannose-6-phosphate	trans-4-hydroxyproline	0.00188674
957	76	335	0.00188857			adenine	threonine	0.00188857
958	106	309	0.00189026			3-hydroxybutyrate (BHBA)	sorbitol	0.00189026
959	311	371	0.00189502			alanylleucine	phenylalanylserine	0.00189502
960	174	368	0.00189612			phosphate	xanthine	0.00189612
961	201	275	0.00189933			fructose-6-phosphate	valine	0.00189933
962	214	276	0.00190003			glycerophosphorylcholine (GPC)	N-acetylglucosamine 6-phosphate	0.00190003
963	131	255	0.00190396			histidine	N-acetylmethionine	0.00190396
964	202	271	0.00190439			campesterol	mannitol	0.00190439
965	359	362	0.00190517			glycine	N6-acetyllysine	0.00190517
966	139	351	0.00190741			tryptophan	uracil	0.00190741
967	255	275	0.00190956			cholesterol	threonine	0.00190956
968	36	61	0.00191101			mannitol	N-acetylglucosamine 6-phosphate	0.00191101
969	302	316	0.0019115			1-palmitoylglycerophosphoethanolamine	2-linoleoylglycerol (2-monolinolein)	0.0019115
970	13	299	0.0019137			phenol sulfate	proline	0.0019137
971	106	145	0.00192008			1-docosahexaenoylglycerophosphocholine (22:6n3)*	pelargonate (9:0)	0.00192008
972	94	357	0.00192153			alanylleucine	creatine	0.00192153
973	74	243	0.0019263			acetylphosphate	trans-4-hydroxyproline	0.0019263
974	45	230	0.00193284			3-dehydrocarnitine*	leucylglycine	0.00193284
975	229	268	0.00193359			2-aminoadipate	isoleucine	0.00193359
976	138	276	0.00194604			isobutyrylcarnitine	N1-methyladenosine	0.00194604
977	200	275	0.00194652			cholestanol	N-acetylmethionine	0.00194652
978	138	264	0.00194882			glycerol 3-phosphate (G3P)	N-acetylglucosamine 6-phosphate	0.00194882
979	97	318	0.00194941			cholestanol	methylphosphate	0.00194941
980	365	372	0.00195185			adenosine	prostaglandin A2	0.00195185
981	171	364	0.0019522			uridine	xanthosine	0.0019522
982	104	332	0.00195229			ethanolamine	urea	0.00195229
983	30	347	0.00195278			alanine	serine	0.00195278
984	93	252	0.00195279			1-oleoylglycerophosphoinositol*	taurine	0.00195279
985	160	295	0.00195557			acetylcarnitine	malate	0.00195557
986	173	276	0.00195999			dimethylarginine (SDMA + ADMA)	palmitoyl sphingomyelin	0.00195999
987	125	192	0.00196158			fructose	N-acetylmethionine	0.00196158
988	48	174	0.00196201			beta-alanine	glutamate, gamma-methyl ester	0.00196201
989	71	283	0.00196278			2-arachidonoylglycerophosphoethanolamine*	fructose-6-phosphate	0.00196278
990	272	335	0.00196585			2-palmitoylglycerophosphoethanolamine*	nicotinamide	0.00196585
991	104	359	0.00196593			N-acetylalanine	sorbitol	0.00196593
992	141	155	0.00196757			alanine	tryptophan	0.00196757
993	190	295	0.0019681			choline phosphate	dehydroascorbate	0.0019681
994	204	318	0.00196917			glucose-6-phosphate (G6P)	palmitoyl sphingomyelin	0.00196917
995	6	318	0.00197			glycylleucine	prostaglandin A2	0.00197
996	325	360	0.00197452			15-HETE	prostaglandin A2	0.00197452
997	45	251	0.00197543			riboflavin (Vitamin B2)	tyrosine	0.00197543
998	60	99	0.00197576			2-aminoadipate	lysine	0.00197576
999	231	243	0.00197679			2-hydroxystearate	adenosine 3'-monophosphate (3'-AMP)	0.00197679
1000	92	93	0.00197691			isoleucylalanine	leucylglycine	0.00197691
1001	94	271	0.00197912			9,10-DiHOME	acetylcarnitine	0.00197912
1002	213	281	0.00197926			acetylphosphate	N6-acetyllysine	0.00197926
1003	96	119	0.00197992			histamine	nervonate (24:1n9)	0.00197992
1004	109	219	0.00198973			adenine	asparagine	0.00198973
1005	213	277	0.00198979			alpha-glutamyltyrosine	hydroxyisovaleroyl carnitine	0.00198979
1006	110	344	0.00199243			histamine	N-acetylneuraminate	0.00199243
1007	41	216	0.00199351			alpha-hydroxyisovalerate	stearoylcarnitine	0.00199351
1008	173	316	0.00199797			1-stearoylglycerophosphoethanolamine	homoserine	0.00199797
1009	138	311	0.00199818			fructose	proline	0.00199818
1010	42	230	0.00199847			cholestanol	phosphate	0.00199847
1011	34	171	0.00199935			1-stearoylglycerophosphoinositol	isoleucine	0.00199935
1012	9	225	0.00200022			1-palmitoylglycerol (1-monopalmitin)	ethanolamine	0.00200022
1013	9	364	0.00200091			1-arachidonoylglycerophosphocholine (20:4n6)*	inositol 1-phosphate (I1P)	0.00200091
1014	31	34	0.0020018			1-arachidonoylglycerophosphocholine (20:4n6)*	urea	0.0020018
1015	96	371	0.0020058			1-oleoylglycerophosphoserine	1-palmitoylglycerol (1-monopalmitin)	0.0020058
1016	170	260	0.00200659			adenine	xanthine	0.00200659
1017	163	184	0.00200719			erythronate*	methionine	0.00200719
1018	77	134	0.00201084			docosapentaenoate (n6 DPA; 22:5n6)	gamma-glutamylphenylalanine	0.00201084
1019	173	305	0.00201184			3-indoxyl sulfate	carnosine	0.00201184
1020	44	248	0.00201416			fructose	phenylalanine	0.00201416
1021	88	175	0.00201949			1-stearoylplasmenylethanolamine*	lignocerate (24:0)	0.00201949
1022	9	100	0.00202277			5-oxoproline	fucose	0.00202277
1023	41	60	0.00202304			1-arachidonoylglycerophosphocholine (20:4n6)*	adenosine 5'diphosphoribose	0.00202304
1024	65	326	0.00202668			1-stearoylglycerophosphoethanolamine	2-hydroxystearate	0.00202668
1025	186	274	0.00202709			2-oleoylglycerophosphocholine*	ribose	0.00202709
1026	71	180	0.00202713			gamma-glutamyltryptophan	N-acetyl-aspartyl-glutamate (NAAG)	0.00202713
1027	11	13	0.00202912			2-palmitoylglycerophosphoethanolamine*	gamma-glutamylglutamate	0.00202912
1028	104	279	0.00203181			1-arachidonoylglycerophosphoinositol*	1-docosahexaenoylglycerophosphocholine (22:6n3)*	0.00203181
1029	25	162	0.00203304			alanine	N-acetylthreonine	0.00203304
1030	203	206	0.00203315			1-myristoylglycerophosphocholine (14:0)	docosapentaenoate (n3 DPA; 22:5n3)	0.00203315
1031	125	173	0.00203334			glycylisoleucine	guanosine	0.00203334
1032	4	354	0.00203711			beta-alanine	fructose	0.00203711
1033	104	237	0.00204074			12-HETE	thromboxane B2	0.00204074
1034	201	274	0.00204309			alanine	lactate	0.00204309
1035	99	205	0.00204345			glycerophosphorylcholine (GPC)	N-acetyl-aspartyl-glutamate (NAAG)	0.00204345
1036	11	360	0.00204557			adenosine 3'-monophosphate (3'-AMP)	glycylproline	0.00204557
1037	65	138	0.00204602			1-arachidonoylglycerophosphoinositol*	tyrosine	0.00204602
1038	357	368	0.00204828			2-oleoylglycerophosphocholine*	cholestanol	0.00204828
1039	45	276	0.00205079			trans-4-hydroxyproline	valine	0.00205079
1040	96	373	0.00205947			2-aminoadipate	N-acetylmethionine	0.00205947
1041	4	6	0.00206295			adenine	xylitol	0.00206295
1042	174	360	0.00206546			12-HETE	15-HETE	0.00206546
1043	171	200	0.00207008			fructose-6-phosphate	tyrosine	0.00207008
1044	71	324	0.00207366			ethanolamine	glycerol 3-phosphate (G3P)	0.00207366
1045	202	325	0.00207387			2-palmitoylglycerophosphoethanolamine*	ribitol	0.00207387
1046	98	332	0.00207402			glycine	riboflavin (Vitamin B2)	0.00207402
1047	99	361	0.0020742			adenosine 2'-monophosphate (2'-AMP)	serine	0.0020742
1048	82	349	0.00207604			adenosine 3'-monophosphate (3'-AMP)	tyrosylglycine	0.00207604
1049	177	187	0.00207712			4-hydroxybutyrate (GHB)	taurocholate	0.00207712
1050	173	368	0.00207732			galactose	gamma-glutamyltyrosine	0.00207732
1051	34	111	0.00207861			fructose	valine	0.00207861
1052	179	185	0.00207958			1-palmitoylglycerol (1-monopalmitin)	alpha-tocopherol	0.00207958
1053	191	214	0.0020806			gamma-glutamylalanine	gamma-glutamylthreonine*	0.0020806
1054	175	256	0.00208561			glutamate	histidine	0.00208561
1055	125	200	0.00208708			fucose	mannose	0.00208708
1056	173	180	0.00209063			beta-alanine	glycerol 3-phosphate (G3P)	0.00209063
1057	121	136	0.00209324			fructose	gamma-glutamylglutamate	0.00209324
1058	2	330	0.00209673			aspartate	C-glycosyltryptophan*	0.00209673
1059	225	255	0.00209906			10-heptadecenoate (17:1n7)	scyllo-inositol	0.00209906
1060	242	245	0.00210116			inositol 1-phosphate (I1P)	mannitol	0.00210116
1061	231	306	0.00210158			leucylglutamate	leucylserine	0.00210158
1062	67	158	0.00210251			isoleucylalanine	phenylalanylalanine	0.00210251
1063	136	251	0.00210936			2-oleoylglycerophosphoinositol*	dihomo-linolenate (20:3n3 or n6)	0.00210936
1064	57	70	0.00210992			C-glycosyltryptophan*	lysine	0.00210992
1065	290	304	0.00211326			2-eicosapentaenoylglycerophosphoethanolamine*	2-palmitoylglycerophosphocholine*	0.00211326
1066	174	359	0.00211383			ornithine	phenylacetylglycine	0.00211383
1067	192	357	0.00211818			fructose-6-phosphate	tryptophan	0.00211818
1068	10	99	0.00212106			glutamate, gamma-methyl ester	trans-4-hydroxyproline	0.00212106
1069	2	293	0.00212304			1-arachidonoylglycerophosphoethanolamine*	adenosine 3'-monophosphate (3'-AMP)	0.00212304
1070	31	71	0.00212489			10-heptadecenoate (17:1n7)	palmitoleate (16:1n7)	0.00212489
1071	131	299	0.00212588			1-oleoylglycerophosphoserine	2-palmitoylglycerophosphoethanolamine*	0.00212588
1072	242	322	0.00212932			campesterol	pelargonate (9:0)	0.00212932
1073	242	353	0.00212981			leucylglutamate	putrescine	0.00212981
1074	201	325	0.0021359			leucylglutamate	threonylphenylalanine	0.0021359
1075	214	371	0.00213722			glycerophosphorylcholine (GPC)	riboflavin (Vitamin B2)	0.00213722
1076	176	251	0.00213853			histidine	xanthine	0.00213853
1077	231	334	0.0021413			fumarate	lysine	0.0021413
1078	11	199	0.00214195			isoleucylalanine	serylphenyalanine	0.00214195
1079	26	31	0.00214257			1-arachidonoylglycerophosphoinositol*	glycerol 2-phosphate	0.00214257
1080	257	271	0.00214872			1-oleoylglycerol (1-monoolein)	1-oleoylglycerophosphoserine	0.00214872
1081	114	166	0.00214898			mannose-6-phosphate	N6-acetyllysine	0.00214898
1082	94	332	0.00214928			arabitol	equol sulfate	0.00214928
1083	275	324	0.00215078			acetylphosphate	serine	0.00215078
1084	174	362	0.00215083			N-acetylglucosamine 6-phosphate	ribitol	0.00215083
1085	94	368	0.00215603			fructose-6-phosphate	uracil	0.00215603
1086	251	257	0.00216011			acetylphosphate	valine	0.00216011
1087	257	362	0.00216062			lysine	mannose-6-phosphate	0.00216062
1088	48	316	0.00216855			mannose-6-phosphate	uracil	0.00216855
1089	178	324	0.00216886			2-arachidonoylglycerophosphoethanolamine*	proline	0.00216886
1090	173	324	0.00217196			gamma-aminobutyrate (GABA)	ribitol	0.00217196
1091	157	165	0.00217865			fructose	ribitol	0.00217865
1092	234	309	0.00218044			dihomo-linoleate (20:2n6)	eicosenoate (20:1n9 or 11)	0.00218044
1093	11	48	0.00218111			isoleucylthreonine	phenylalanylserine	0.00218111
1094	139	325	0.00218506			1-arachidonoylglycerophosphoinositol*	2-arachidonoylglycerophosphoethanolamine*	0.00218506
1095	11	311	0.00219066			cholesterol	riboflavin (Vitamin B2)	0.00219066
1096	175	365	0.00219126			1-arachidonoylglycerophosphoinositol*	phosphate	0.00219126
1097	145	246	0.00219199			fucose	uridine	0.00219199
1098	86	295	0.00219664			creatine	leucylthreonine	0.00219664
1099	11	371	0.00219872			5-methylthioadenosine (MTA)	palmitoyl sphingomyelin	0.00219872
1100	239	260	0.00219888			1-arachidonoylglycerophosphoinositol*	xanthine	0.00219888
1101	160	176	0.00220012			laurate (12:0)	methionine	0.00220012
1102	127	364	0.00220064			dimethylarginine (SDMA + ADMA)	fumarate	0.00220064
1103	11	38	0.00220378			beta-sitosterol	urea	0.00220378
1104	173	192	0.00220657			1-arachidonoylglycerophosphoinositol*	1-palmitoylplasmenylethanolamine*	0.00220657
1105	11	299	0.00220886			fructose	glutamate, gamma-methyl ester	0.00220886
1106	95	324	0.00221147			1-arachidonoylglycerophosphoinositol*	pelargonate (9:0)	0.00221147
1107	311	351	0.00221435			Ac-Ser-Asp-Lys-Pro-OH	ribitol	0.00221435
1108	182	324	0.00221459			phosphate	threonine	0.00221459
1109	64	229	0.00221732			gamma-glutamylleucine	ribitol	0.00221732
1110	271	279	0.0022238			2-methylbutyrylcarnitine (C5)	isobutyrylcarnitine	0.0022238
1111	139	290	0.00222721			N6-acetyllysine	N-acetylthreonine	0.00222721
1112	9	11	0.00222815			cholesterol	ornithine	0.00222815
1113	16	20	0.00223366			1-arachidonoylglycerophosphocholine (20:4n6)*	1-arachidonoylglycerophosphoinositol*	0.00223366
1114	34	114	0.00224057			1-eicosatrienoylglycerophosphoethanolamine*	1-linoleoylglycerol (1-monolinolein)	0.00224057
1115	271	316	0.00224071			1-palmitoylglycerol (1-monopalmitin)	arabitol	0.00224071
1116	39	225	0.00224175			N6-acetyllysine	proline	0.00224175
1117	42	272	0.00224311			1-stearoylglycerol (1-monostearin)	inositol 1-phosphate (I1P)	0.00224311
1118	240	295	0.00224383			1-stearoylglycerophosphoinositol	N-acetylalanine	0.00224383
1119	11	368	0.0022445			leucine	palmitoyl sphingomyelin	0.0022445
1120	68	166	0.00224483			1-arachidonoylglycerophosphoinositol*	valine	0.00224483
1121	76	314	0.00224861			2-oleoylglycerophosphoserine*	equol sulfate	0.00224861
1122	276	371	0.0022652			3-hydroxybutyrate (BHBA)	pipecolate	0.0022652
1123	104	230	0.00226647			N-acetylmethionine	xanthine	0.00226647
1124	202	332	0.00226658			alanine	isoleucine	0.00226658
1125	332	359	0.00226712			glycine	serine	0.00226712
1126	230	316	0.00227163			serine	tryptophan	0.00227163
1127	9	264	0.00227174			isoleucine	proline	0.00227174
1128	251	331	0.00227754			1-arachidonoylglycerophosphocholine (20:4n6)*	methylphosphate	0.00227754
1129	39	230	0.00227799			lysine	sedoheptulose-7-phosphate	0.00227799
1130	234	322	0.00227851			1-stearoylglycerol (1-monostearin)	isoleucine	0.00227851
1131	11	104	0.00227991			isoleucylthreonine	putrescine	0.00227991
1132	272	373	0.0022836			1-arachidonoylglycerophosphoinositol*	alanine	0.0022836
1133	357	360	0.00228837			N-acetylalanine	xylitol	0.00228837
1134	131	191	0.00228947			trans-4-hydroxyproline	tyrosine	0.00228947
1135	32	316	0.00229044			campesterol	glutamate	0.00229044
1136	199	225	0.00229242			1-oleoylplasmenylethanolamine*	proline	0.00229242
1137	126	336	0.00229277			glycerol 2-phosphate	inositol 1-phosphate (I1P)	0.00229277
1138	178	325	0.00229317			betaine	spermidine	0.00229317
1139	190	329	0.00229438			gamma-aminobutyrate (GABA)	riboflavin (Vitamin B2)	0.00229438
1140	66	114	0.00229592			glucose-6-phosphate (G6P)	sarcosine (N-Methylglycine)	0.00229592
1141	145	234	0.00230956			2-oleoylglycerophosphoethanolamine*	arabitol	0.00230956
1142	11	237	0.0023099			creatine	isoleucylthreonine	0.0023099
1143	42	304	0.00231152			1-arachidonoylglycerophosphoinositol*	lactate	0.00231152
1144	11	326	0.00231212			1-stearoylglycerophosphoinositol	phenylacetylglycine	0.00231212
1145	86	99	0.00231921			1-arachidonoylglycerophosphoinositol*	ribose	0.00231921
1146	136	371	0.00232103			5-methylthioadenosine (MTA)	adenosine 3'-monophosphate (3'-AMP)	0.00232103
1147	38	170	0.00232547			C-glycosyltryptophan*	xanthine	0.00232547
1148	94	260	0.00232628			1-palmitoylplasmenylethanolamine*	erythronate*	0.00232628
1149	166	313	0.00232703			acetylphosphate	methionine	0.00232703
1150	94	202	0.00232825			equol sulfate	phosphoethanolamine	0.00232825
1151	122	245	0.00232837			acetylphosphate	glycine	0.00232837
1152	276	351	0.00232922			aspartylleucine	leucylserine	0.00232922
1153	132	374	0.00233056			N-acetylmethionine	threonine	0.00233056
1154	11	279	0.0023366			caprate (10:0)	xylulose	0.0023366
1155	199	255	0.00233733			1-arachidonoylglycerophosphoinositol*	N-acetylthreonine	0.00233733
1156	45	104	0.00234713			glycerol 2-phosphate	mannitol	0.00234713
1157	264	372	0.00234939			2-aminoadipate	alanine	0.00234939
1158	180	274	0.00235598			methylphosphate	xanthosine	0.00235598
1159	74	334	0.00236002			gamma-glutamylglutamate	N-acetyl-aspartyl-glutamate (NAAG)	0.00236002
1160	246	322	0.00236574			3-dehydrocarnitine*	serylphenyalanine	0.00236574
1161	76	121	0.00236595			leucylthreonine	putrescine	0.00236595
1162	36	282	0.00236791			3-hydroxybutyrate (BHBA)	aspartate	0.00236791
1163	47	238	0.00237376			1-palmitoylglycerophosphoethanolamine	N-glycolylneuraminate	0.00237376
1164	260	321	0.00237717			2-arachidonoylglycerophosphocholine*	lactose	0.00237717
1165	41	290	0.00237898			methionine	pseudouridine	0.00237898
1166	9	305	0.00238226			1-stearoylglycerophosphoethanolamine	ornithine	0.00238226
1167	111	201	0.00238322			1-arachidonoylglycerophosphocholine (20:4n6)*	phenylalanine	0.00238322
1168	94	305	0.00238633			alpha-tocopherol	glycerophosphorylcholine (GPC)	0.00238633
1169	173	360	0.00239812			acetylphosphate	phenylalanine	0.00239812
1170	45	121	0.00240458			fructose	tyrosine	0.00240458
1171	175	311	0.0024092			2-aminoadipate	aspartate	0.0024092
1172	3	287	0.00240949			fucose	phosphate	0.00240949
1173	192	257	0.00241066			10-nonadecenoate (19:1n9)	oleate (18:1n9)	0.00241066
1174	13	108	0.00241513			glutamate, gamma-methyl ester	mannose-6-phosphate	0.00241513
1175	119	276	0.00241727			1-docosahexaenoylglycerophosphocholine (22:6n3)*	allantoin	0.00241727
1176	16	61	0.00241775			asparagine	N-acetylmethionine	0.00241775
1177	192	240	0.00242077			1-eicosatrienoylglycerophosphoethanolamine*	2-linoleoylglycerol (2-monolinolein)	0.00242077
1178	31	152	0.00242347			glutamate, gamma-methyl ester	leucine	0.00242347
1179	192	239	0.0024251			1-oleoylglycerophosphoserine	cytidine 5'-monophosphate (5'-CMP)	0.0024251
1180	190	251	0.00242816			glutamate, gamma-methyl ester	laurate (12:0)	0.00242816
1181	100	138	0.00243013			glucose-6-phosphate (G6P)	lysine	0.00243013
1182	39	362	0.00243625			adenosine 5'diphosphoribose	cholestanol	0.00243625
1183	108	302	0.00243835			1-stearoylglycerol (1-monostearin)	uracil	0.00243835
1184	125	321	0.00243889			allantoin	phenol sulfate	0.00243889
1185	70	339	0.00244187			beta-alanine	pseudouridine	0.00244187
1186	109	243	0.00244354			2-palmitoylglycerophosphocholine*	sphingosine	0.00244354
1187	202	239	0.00245132			alpha-glutamyltyrosine	leucylglycine	0.00245132
1188	332	351	0.00246247			glycine	laurate (12:0)	0.00246247
1189	308	337	0.00246369			serine	threonine	0.00246369
1190	9	325	0.00246495			phenylalanylglycine	spermine	0.00246495
1191	13	38	0.00246783			1-arachidonoylglycerophosphocholine (20:4n6)*	riboflavin (Vitamin B2)	0.00246783
1192	187	365	0.00247242			1-docosahexaenoylglycerophosphocholine (22:6n3)*	1-palmitoylplasmenylethanolamine*	0.00247242
1193	107	333	0.0024732			gamma-glutamyltyrosine	uridine	0.0024732
1194	178	188	0.00247489			alanylphenylalanine	serylleucine	0.00247489
1195	192	360	0.0024774			gamma-aminobutyrate (GABA)	gamma-glutamylvaline	0.0024774
1196	239	271	0.00247762			glutamate, gamma-methyl ester	tyrosine	0.00247762
1197	46	314	0.00249133			laurate (12:0)	N6-acetyllysine	0.00249133
1198	331	359	0.00249148			2-aminobutyrate	pipecolate	0.00249148
1199	39	173	0.00249552			sedoheptulose-7-phosphate	tryptophan	0.00249552
1200	200	264	0.00249601			1-stearoylglycerol (1-monostearin)	fructose	0.00249601
1201	281	339	0.00249649			glycerol 3-phosphate (G3P)	methylphosphate	0.00249649
1202	145	219	0.00249817			nervonate (24:1n9)	sphingosine	0.00249817
1203	71	304	0.00250073			creatine	hydroxyisovaleroyl carnitine	0.00250073
1204	120	226	0.00250181			2-palmitoylglycerophosphoethanolamine*	phenylacetylglycine	0.00250181
1205	174	240	0.00250286			asparagylleucine	Isobar: betaine aldehyde, N-methyldiethanolamine	0.00250286
1206	29	135	0.00250867			fructose-6-phosphate	leucine	0.00250867
1207	230	255	0.00251318			1-oleoylglycerophosphoglycerol*	catechol sulfate	0.00251318
1208	296	344	0.00251645			isoleucine	mannitol	0.00251645
1209	134	135	0.00251724			palmitoylcarnitine	stearoylcarnitine	0.00251724
1210	116	168	0.00251803			carnosine	catechol sulfate	0.00251803
1211	11	191	0.00251937			arachidonate (20:4n6)	erucate (22:1n9)	0.00251937
1212	221	343	0.0025225			1-arachidonoylglycerophosphoinositol*	glutamate	0.0025225
1213	275	364	0.0025256			hypoxanthine	stearoyl sphingomyelin	0.0025256
1214	9	260	0.00252768			N-acetylglucosamine 6-phosphate	urea	0.00252768
1215	11	276	0.00253333			1-arachidonoylglycerophosphocholine (20:4n6)*	methionine	0.00253333
1216	45	260	0.00253602			1-arachidonoylglycerophosphoinositol*	N-acetylmethionine	0.00253602
1217	98	136	0.00253687			2-aminoadipate	methionine	0.00253687
1218	202	279	0.00253939			adenosine 2'-monophosphate (2'-AMP)	C-glycosyltryptophan*	0.00253939
1219	86	271	0.00254086			glycine	N-acetylthreonine	0.00254086
1220	332	371	0.0025427			5-methylthioadenosine (MTA)	N6-acetyllysine	0.0025427
1221	182	364	0.00254572			serine	xanthine	0.00254572
1222	191	290	0.00254608			gamma-glutamylleucine	urea	0.00254608
1223	49	154	0.00254641			glutamate	ornithine	0.00254641
1224	187	188	0.00254768			2'-deoxyadenosine 3'-monophosphate	cytidine-5'-diphosphoethanolamine	0.00254768
1225	66	161	0.00254917			gamma-glutamyltyrosine	gamma-glutamylvaline	0.00254917
1226	71	326	0.00254956			2-oleoylglycerophosphoethanolamine*	docosahexaenoate (DHA; 22:6n3)	0.00254956
1227	86	358	0.00255051			2-palmitoylglycerophosphoethanolamine*	ribose	0.00255051
1228	295	368	0.00255107			5-methylthioadenosine (MTA)	trans-urocanate	0.00255107
1229	176	332	0.00255268			palmitoyl sphingomyelin	valine	0.00255268
1230	191	362	0.00255528			fumarate	serine	0.00255528
1231	190	373	0.00255725			glutamate	uracil	0.00255725
1232	197	280	0.00255848			glucose-6-phosphate (G6P)	xylitol	0.00255848
1233	329	355	0.00255951			glycerate	N-delta-acetylornithine*	0.00255951
1234	178	332	0.00256173			sarcosine (N-Methylglycine)	thymidine	0.00256173
1235	199	325	0.00256185			gamma-aminobutyrate (GABA)	serine	0.00256185
1236	138	304	0.00256409			glycerol 2-phosphate	riboflavin (Vitamin B2)	0.00256409
1237	311	359	0.00256865			cholestanol	phenylacetylglycine	0.00256865
1238	60	119	0.00257413			phosphate	tryptophan	0.00257413
1239	66	152	0.0025745			2-hydroxystearate	asparagine	0.0025745
1240	20	28	0.00257739			2-oleoylglycerophosphoethanolamine*	cytidine 5'-monophosphate (5'-CMP)	0.00257739
1241	245	352	0.00257894			1-linoleoylglycerol (1-monolinolein)	1-oleoylglycerophosphoethanolamine	0.00257894
1242	174	305	0.00258688			leucylserine	threonylleucine	0.00258688
1243	36	225	0.00258734			fructose-6-phosphate	phenylalanine	0.00258734
1244	95	118	0.00258958			1-palmitoylglycerophosphoethanolamine	inositol 1-phosphate (I1P)	0.00258958
1245	42	100	0.00259135			Ac-Ser-Asp-Lys-Pro-OH	ascorbate (Vitamin C)	0.00259135
1246	48	125	0.0025924			1-stearoylglycerophosphoinositol	adenosine 5'diphosphoribose	0.0025924
1247	212	280	0.00259457			2-arachidonoylglycerophosphoethanolamine*	beta-alanine	0.00259457
1248	23	113	0.00259988			hippurate	N-delta-acetylornithine*	0.00259988
1249	11	305	0.00260184			1-linoleoylglycerophosphoinositol*	arabinose	0.00260184
1250	119	357	0.00260401			1-arachidonoylglycerophosphoinositol*	phenylalanine	0.00260401
1251	100	359	0.00260492			asparagine	trans-4-hydroxyproline	0.00260492
1252	65	102	0.00260512			adenosine 5'diphosphoribose	tryptophan	0.00260512
1253	85	147	0.00261155			2-oleoylglycerophosphocholine*	adrenate (22:4n6)	0.00261155
1254	131	260	0.00261477			5-methyltetrahydrofolate (5MeTHF)	cysteine	0.00261477
1255	48	119	0.00261582			campesterol	methionine	0.00261582
1256	76	356	0.00261716			2-arachidonoylglycerophosphoethanolamine*	asparagine	0.00261716
1257	38	239	0.00261906			3-hydroxybutyrate (BHBA)	thymine	0.00261906
1258	230	357	0.00262087			1-palmitoylplasmenylethanolamine*	laurate (12:0)	0.00262087
1259	34	364	0.00262585			isoleucine	trans-4-hydroxyproline	0.00262585
1260	178	180	0.00263393			1-palmitoylglycerol (1-monopalmitin)	urea	0.00263393
1261	204	251	0.00264629			gamma-aminobutyrate (GABA)	gamma-glutamylglutamate	0.00264629
1262	121	359	0.00264686			glycylleucine	lysine	0.00264686
1263	9	240	0.00264879			aspartate	tryptophan	0.00264879
1264	74	231	0.00265577			1-arachidonoylglycerophosphocholine (20:4n6)*	leucine	0.00265577
1265	160	351	0.00265766			3-dehydrocarnitine*	isoleucylalanine	0.00265766
1266	149	294	0.00265847			dimethylarginine (SDMA + ADMA)	threonine	0.00265847
1267	119	358	0.00266127			cystine	palmitoyl ethanolamide	0.00266127
1268	77	273	0.00266617			asparagine	trans-urocanate	0.00266617
1269	181	274	0.00266777			3-indoxyl sulfate	N-acetylaspartate (NAA)	0.00266777
1270	94	362	0.00267292			gamma-glutamylisoleucine*	N-acetyl-aspartyl-glutamate (NAAG)	0.00267292
1271	34	284	0.00267346			acetylphosphate	uracil	0.00267346
1272	255	359	0.00267404			1-palmitoylglycerol (1-monopalmitin)	nicotinamide adenine dinucleotide (NAD+)	0.00267404
1273	199	260	0.00267436			mannitol	tryptophan	0.00267436
1274	175	325	0.00267607			glycerol 2-phosphate	methionine	0.00267607
1275	260	283	0.00267624			fucose	riboflavin (Vitamin B2)	0.00267624
1276	57	72	0.00267634			methionine	nicotinamide	0.00267634
1277	223	361	0.00268563			2-eicosapentaenoylglycerophosphoethanolamine*	2-stearoylglycerophosphocholine*	0.00268563
1278	34	71	0.00268879			inosine	tyrosylglycine	0.00268879
1279	131	283	0.00268927			1-palmitoylglycerol (1-monopalmitin)	2-palmitoylglycerophosphoethanolamine*	0.00268927
1280	65	152	0.00268929			campesterol	nicotinamide	0.00268929
1281	174	329	0.00269361			2-oleoylglycerophosphocholine*	cytidine 5'-monophosphate (5'-CMP)	0.00269361
1282	100	199	0.00269527			fructose-6-phosphate	sarcosine (N-Methylglycine)	0.00269527
1283	71	139	0.0026963			adenosine 5'diphosphoribose	glycerol 2-phosphate	0.0026963
1284	31	36	0.00269695			2-palmitoylglycerophosphoethanolamine*	cholesterol	0.00269695
1285	10	121	0.00270091			1-oleoylglycerophosphoserine	1-palmitoylglycerophosphoethanolamine	0.00270091
1286	237	260	0.00270596			1-arachidonoylglycerophosphoethanolamine*	aspartate	0.00270596
1287	95	201	0.00270697			lactate	methionine	0.00270697
1288	173	240	0.00270707			Ac-Ser-Asp-Lys-Pro-OH	glycerophosphorylcholine (GPC)	0.00270707
1289	136	373	0.00270826			fructose	leucine	0.00270826
1290	160	255	0.0027143			C-glycosyltryptophan*	xylitol	0.0027143
1291	194	353	0.00271448			dimethylarginine (SDMA + ADMA)	mannitol	0.00271448
1292	30	142	0.00271569			glutamine-leucine	threonylphenylalanine	0.00271569
1293	121	251	0.00271819			1-oleoylglycerophosphoinositol*	cis-vaccenate (18:1n7)	0.00271819
1294	10	216	0.00272034			aspartate	lysine	0.00272034
1295	4	343	0.00272345			1-arachidonoylglycerophosphoethanolamine*	homoserine	0.00272345
1296	202	295	0.00272975			12-HETE	stearoyl sphingomyelin	0.00272975
1297	239	371	0.00273443			glycine	palmitoyl sphingomyelin	0.00273443
1298	175	185	0.0027363			laurate (12:0)	xanthine	0.0027363
1299	283	305	0.00274173			fucose	gamma-glutamylthreonine*	0.00274173
1300	190	276	0.00274272			nicotinamide	phenylalanine	0.00274272
1301	11	359	0.00274423			glucose-6-phosphate (G6P)	N-acetylmethionine	0.00274423
1302	107	231	0.00275294			1-arachidonoylglycerophosphoinositol*	tryptophan	0.00275294
1303	9	360	0.00275299			alanylphenylalanine	isoleucylalanine	0.00275299
1304	106	245	0.00275555			1-arachidonoylglycerophosphocholine (20:4n6)*	tyrosine	0.00275555
1305	71	170	0.00275882			alanylleucine	leucylserine	0.00275882
1306	43	50	0.00276254			2-palmitoylglycerophosphoethanolamine*	erythronate*	0.00276254
1307	114	127	0.00276375			1-stearoylglycerophosphoserine*	2'-deoxycytidine	0.00276375
1308	180	276	0.00276406			arabitol	beta-sitosterol	0.00276406
1309	175	283	0.00276555			gamma-glutamylglutamate	N-acetylmethionine	0.00276555
1310	173	230	0.00277185			fucose	nicotinamide	0.00277185
1311	99	329	0.00277249			fructose	isoleucine	0.00277249
1312	260	279	0.00277738			adenosine 3'-monophosphate (3'-AMP)	sarcosine (N-Methylglycine)	0.00277738
1313	119	272	0.00277981			methionine	N-acetylthreonine	0.00277981
1314	48	271	0.00279193			asparagine	N-acetylalanine	0.00279193
1315	202	237	0.0027921			2-arachidonoylglycerophosphoethanolamine*	N6-acetyllysine	0.0027921
1316	170	202	0.00279229			glycine	lactate	0.00279229
1317	64	268	0.00279414			erythronate*	glycine	0.00279414
1318	125	199	0.00280153			2-methylbutyrylcarnitine (C5)	N1-methyladenosine	0.00280153
1319	131	360	0.00280732			beta-alanine	glycerol 2-phosphate	0.00280732
1320	216	271	0.00280919			campesterol	tyrosine	0.00280919
1321	202	214	0.0028197			homoserine	N6-acetyllysine	0.0028197
1322	54	281	0.00282184			glycine	histidine	0.00282184
1323	232	318	0.00282263			2-docosahexaenoylglycerophosphocholine*	nervonate (24:1n9)	0.00282263
1324	171	313	0.00282348			isoleucylaspartate	prostaglandin A2	0.00282348
1325	177	186	0.00282441			ethanolamine	phosphoethanolamine	0.00282441
1326	131	202	0.002832			galactose	gamma-glutamyltryptophan	0.002832
1327	9	230	0.00283668			campesterol	glycine	0.00283668
1328	39	202	0.00283775			1-arachidonoylglycerophosphocholine (20:4n6)*	isoleucine	0.00283775
1329	11	351	0.00283967			1-stearoylglycerol (1-monostearin)	glycine	0.00283967
1330	41	299	0.00284173			1-arachidonoylglycerophosphoinositol*	threonine	0.00284173
1331	176	276	0.00284256			1-stearoylglycerophosphoethanolamine	pelargonate (9:0)	0.00284256
1332	119	271	0.00284424			fumarate	N-acetylmethionine	0.00284424
1333	94	325	0.00284446			asparagine	N6-acetyllysine	0.00284446
1334	42	216	0.00284737			acetylphosphate	riboflavin (Vitamin B2)	0.00284737
1335	13	65	0.00285022			1-stearoylglycerophosphoinositol	homoserine	0.00285022
1336	136	230	0.0028527			1-docosahexaenoylglycerophosphocholine (22:6n3)*	2-oleoylglycerophosphocholine*	0.0028527
1337	6	336	0.00285411			C-glycosyltryptophan*	isoleucine	0.00285411
1338	240	255	0.00285437			15-HETE	spermidine	0.00285437
1339	305	357	0.00285591			leucine	mannitol	0.00285591
1340	357	359	0.00285886			phenylalanine	trans-4-hydroxyproline	0.00285886
1341	13	282	0.00286115			trans-4-hydroxyproline	tryptophan	0.00286115
1342	119	214	0.00286612			1-docosahexaenoylglycerophosphocholine (22:6n3)*	N-glycolylneuraminate	0.00286612
1343	107	109	0.00287081			asparagine	histidine	0.00287081
1344	121	202	0.00287364			alanylphenylalanine	alpha-glutamyltyrosine	0.00287364
1345	325	371	0.00287411			aspartate	glycine	0.00287411
1346	9	368	0.00287731			riboflavin (Vitamin B2)	xanthine	0.00287731
1347	67	162	0.00287836			1-arachidonoylglycerophosphocholine (20:4n6)*	valine	0.00287836
1348	190	272	0.00288248			2-oleoylglycerophosphoinositol*	docosapentaenoate (n3 DPA; 22:5n3)	0.00288248
1349	276	295	0.00288451			glucose-6-phosphate (G6P)	N-acetylalanine	0.00288451
1350	314	315	0.00288599			N-acetylmethionine	palmitoyl sphingomyelin	0.00288599
1351	9	191	0.00288653			pipecolate	pro-hydroxy-pro	0.00288653
1352	139	225	0.00288982			1-arachidonoylglycerophosphocholine (20:4n6)*	glutamate	0.00288982
1353	178	283	0.00289259			cholesterol	inositol 1-phosphate (I1P)	0.00289259
1354	11	240	0.00289545			gamma-aminobutyrate (GABA)	nicotinamide	0.00289545
1355	279	371	0.00289547			1-arachidonoylglycerophosphoinositol*	leucine	0.00289547
1356	118	180	0.00289813			N-acetylthreonine	xanthine	0.00289813
1357	23	301	0.00290133			ascorbate (Vitamin C)	gamma-glutamylglutamate	0.00290133
1358	60	205	0.00290243			1-linoleoylglycerophosphoinositol*	pentadecanoate (15:0)	0.00290243
1359	71	102	0.00290252			2-hydroxystearate	glycylproline	0.00290252
1360	88	177	0.0029062			2-palmitoylglycerophosphoethanolamine*	adrenate (22:4n6)	0.0029062
1361	230	311	0.00290659			5-oxoproline	galactose	0.00290659
1362	37	158	0.00292046			isoleucine	phosphate	0.00292046
1363	194	231	0.00292049			1-palmitoylglycerophosphoinositol*	dihomo-linolenate (20:3n3 or n6)	0.00292049
1364	125	260	0.00292376			glutamine-leucine	isoleucylalanine	0.00292376
1365	122	234	0.00292845			beta-alanine	methionine	0.00292845
1366	38	299	0.00292905			aspartylleucine	isoleucylthreonine	0.00292905
1367	219	246	0.00293052			1-palmitoylplasmenylethanolamine*	pelargonate (9:0)	0.00293052
1368	38	362	0.00293159			hydroxyisovaleroyl carnitine	leucylthreonine	0.00293159
1369	120	232	0.00293936			1-palmitoylplasmenylethanolamine*	uracil	0.00293936
1370	100	360	0.0029399			asparagylleucine	isoleucylaspartate	0.0029399
1371	176	316	0.00294341			adenosine 5'diphosphoribose	tyrosine	0.00294341
1372	11	71	0.00295033			fumarate	proline	0.00295033
1373	88	181	0.0029504			1-arachidonoylglycerophosphoinositol*	2-palmitoylglycerophosphoethanolamine*	0.0029504
1374	247	350	0.00295098			5-oxoproline	gamma-glutamylisoleucine*	0.00295098
1375	37	114	0.00295306			leu-leu-leu	threonate	0.00295306
1376	216	335	0.00295445			1-palmitoylglycerophosphoinositol*	arabitol	0.00295445
1377	173	371	0.00295532			homoserine	sorbitol	0.00295532
1378	34	65	0.00295767			fructose	xanthine	0.00295767
1379	295	351	0.00295873			1-palmitoylglycerol (1-monopalmitin)	2-oleoylglycerophosphocholine*	0.00295873
1380	65	304	0.00296029			palmitoyl sphingomyelin	threonine	0.00296029
1381	118	324	0.00296142			2-oleoylglycerophosphocholine*	phenylacetylglycine	0.00296142
1382	174	260	0.00296293			ascorbate (Vitamin C)	ribitol	0.00296293
1383	7	287	0.00297684			fructose-6-phosphate	methionine	0.00297684
1384	94	240	0.00297927			15-methylpalmitate (isobar with 2-methylpalmitate)	oleate (18:1n9)	0.00297927
1385	11	239	0.00298158			acetylphosphate	leucine	0.00298158
1386	257	295	0.00298468			1-arachidonoylglycerophosphoinositol*	laurate (12:0)	0.00298468
1387	210	370	0.0029877			mannose-6-phosphate	palmitoyl sphingomyelin	0.0029877
1388	59	233	0.00298958			HEPES	valylserine	0.00298958
1389	146	247	0.00299715			2-hydroxypalmitate	isoleucylglycine	0.00299715
1390	304	362	0.00299911			cys-gly, oxidized	leu-leu-leu	0.00299911
1391	173	364	0.00299928			phenylacetylglycine	uracil	0.00299928
1392	192	214	0.00300363			fructose	urea	0.00300363
1393	32	357	0.00300516			glutamate, gamma-methyl ester	histidine	0.00300516
1394	146	183	0.00300617			1-oleoylplasmenylethanolamine*	trans-4-hydroxyproline	0.00300617
1395	139	176	0.00300898			cys-gly, oxidized	gamma-glutamylmethionine	0.00300898
1396	279	335	0.00301224			cholesterol	fumarate	0.00301224
1397	86	176	0.00301431			N-acetylthreonine	sorbitol	0.00301431
1398	10	160	0.00301471			5-methylthioadenosine (MTA)	fumarate	0.00301471
1399	200	284	0.00301829			1-arachidonoylglycerophosphoethanolamine*	dimethylarginine (SDMA + ADMA)	0.00301829
1400	295	371	0.00301997			glycerol 3-phosphate (G3P)	nicotinamide adenine dinucleotide (NAD+)	0.00301997
1401	95	332	0.00302221			palmitoyl sphingomyelin	xanthine	0.00302221
1402	173	175	0.00302669			Ac-Ser-Asp-Lys-Pro-OH	serine	0.00302669
1403	121	295	0.00302779			fructose	fucose	0.00302779
1404	316	368	0.00303236			aspartate	palmitoyl sphingomyelin	0.00303236
1405	102	114	0.00303785			proline	valine	0.00303785
1406	220	232	0.00304012			adrenate (22:4n6)	arabitol	0.00304012
1407	214	311	0.00304211			hypotaurine	isoleucylaspartate	0.00304211
1408	325	351	0.00304285			histidine	phosphate	0.00304285
1409	214	260	0.00304369			riboflavin (Vitamin B2)	threonine	0.00304369
1410	138	260	0.0030503			histidine	methionine	0.0030503
1411	119	260	0.00305519			cholestanol	methionine	0.00305519
1412	176	311	0.00305623			asparagine	methionine	0.00305623
1413	212	316	0.00305901			fumarate	phosphate	0.00305901
1414	74	244	0.00305902			hippurate	proline	0.00305902
1415	60	295	0.00305943			3-dehydrocarnitine*	leucylmethionine	0.00305943
1416	174	230	0.00306075			2-hydroxystearate	palmitoyl sphingomyelin	0.00306075
1417	316	360	0.00306249			fructose-6-phosphate	isoleucine	0.00306249
1418	104	191	0.00306378			proline	tyrosine	0.00306378
1419	325	362	0.00306945			alanine	glutamate	0.00306945
1420	104	214	0.00308212			riboflavin (Vitamin B2)	uracil	0.00308212
1421	167	219	0.00308501			alanine	histidine	0.00308501
1422	77	93	0.00308794			ergothioneine	hydroxyisovaleroyl carnitine	0.00308794
1423	237	271	0.00308808			3-indoxyl sulfate	acetylcarnitine	0.00308808
1424	165	297	0.00309392			lactate	N6-acetyllysine	0.00309392
1425	11	225	0.00309475			eicosenoate (20:1n9 or 11)	pantothenate	0.00309475
1426	295	305	0.00309497			1-arachidonoylglycerophosphoinositol*	inositol 1-phosphate (I1P)	0.00309497
1427	167	322	0.00309722			palmitoyl sphingomyelin	phenylalanine	0.00309722
1428	255	360	0.00310159			ergothioneine	putrescine	0.00310159
1429	199	200	0.00310273			mannitol	tyrosine	0.00310273
1430	98	251	0.00310387			glycerol 2-phosphate	glycerol 3-phosphate (G3P)	0.00310387
1431	175	180	0.00310503			adenosine 2'-monophosphate (2'-AMP)	lysine	0.00310503
1432	98	257	0.00310533			fucose	gamma-glutamylglutamate	0.00310533
1433	31	225	0.00310749			adenosine 2'-monophosphate (2'-AMP)	mannose-6-phosphate	0.00310749
1434	11	357	0.00311634			1-oleoylglycerophosphoserine	inositol 1-phosphate (I1P)	0.00311634
1435	221	319	0.00311756			1-arachidonoylglycerophosphoinositol*	trans-4-hydroxyproline	0.00311756
1436	121	360	0.00311884			hypoxanthine	prostaglandin D2	0.00311884
1437	108	304	0.00312086			aspartate	tyrosine	0.00312086
1438	9	200	0.00312384			allantoin	phenylacetylglycine	0.00312384
1439	31	282	0.00312419			1-arachidonoylglycerophosphocholine (20:4n6)*	glycerol 3-phosphate (G3P)	0.00312419
1440	240	357	0.00313789			1-oleoylglycerophosphoserine	N-glycolylneuraminate	0.00313789
1441	199	305	0.00313934			leucine	trans-4-hydroxyproline	0.00313934
1442	171	324	0.00314079			glycerol 2-phosphate	phenylalanine	0.00314079
1443	139	332	0.00314083			ethanolamine	ribitol	0.00314083
1444	9	125	0.00314105			cholesterol	serine	0.00314105
1445	104	358	0.00314138			1-arachidonoylglycerophosphocholine (20:4n6)*	beta-alanine	0.00314138
1446	257	325	0.0031423			alanine	trans-urocanate	0.0031423
1447	100	304	0.0031433			mannose-6-phosphate	riboflavin (Vitamin B2)	0.0031433
1448	321	371	0.00314421			adenosine 5'diphosphoribose	phenylacetylglycine	0.00314421
1449	94	360	0.00315022			pseudouridine	xanthine	0.00315022
1450	42	362	0.00315146			acetylphosphate	tyrosine	0.00315146
1451	24	164	0.00315372			1-stearoylglycerophosphoinositol	uracil	0.00315372
1452	173	332	0.00315775			1-margaroylglycerophosphocholine (17:0)	eicosapentaenoate (EPA; 20:5n3)	0.00315775
1453	160	371	0.00316194			fructose	serine	0.00316194
1454	237	304	0.00316431			dimethylarginine (SDMA + ADMA)	xanthine	0.00316431
1455	245	322	0.00316432			lactate	phenylacetylglycine	0.00316432
1456	167	352	0.00316531			leucylserine	putrescine	0.00316531
1457	131	275	0.0031654			ergothioneine	threonylleucine	0.0031654
1458	58	73	0.00316659			campesterol	N-acetylglucosamine 6-phosphate	0.00316659
1459	31	111	0.00316668			2-hydroxyglutarate	3-(4-hydroxyphenyl)lactate	0.00316668
1460	257	311	0.00316714			1-oleoylglycerophosphoserine	alpha-tocopherol	0.00316714
1461	180	332	0.00316796			mannose-6-phosphate	phosphate	0.00316796
1462	264	274	0.00316954			gamma-glutamylglutamate	serine	0.00316954
1463	42	329	0.00317195			methylphosphate	N-acetyl-aspartyl-glutamate (NAAG)	0.00317195
1464	139	192	0.00317522			1-stearoylglycerophosphoinositol	sarcosine (N-Methylglycine)	0.00317522
1465	107	122	0.00318165			cholesterol	glutamate, gamma-methyl ester	0.00318165
1466	95	138	0.00318726			alanylphenylalanine	aspartylleucine	0.00318726
1467	190	192	0.003189			Ac-Ser-Asp-Lys-Pro-OH	cholestanol	0.003189
1468	191	332	0.00319126			glucose-6-phosphate (G6P)	glutamate, gamma-methyl ester	0.00319126
1469	10	191	0.00319336			glutamate	serine	0.00319336
1470	111	264	0.00319558			1-arachidonoylglycerophosphoethanolamine*	glutamate	0.00319558
1471	225	304	0.00319646			alpha-tocopherol	methylphosphate	0.00319646
1472	191	311	0.00320106			inositol 1-phosphate (I1P)	phenylacetylglycine	0.00320106
1473	131	170	0.00320115			glutamate	phosphate	0.00320115
1474	282	290	0.00320121			campesterol	erythronate*	0.00320121
1475	121	230	0.0032018			N-glycolylneuraminate	ornithine	0.0032018
1476	162	165	0.00320209			aspartate	isoleucine	0.00320209
1477	48	283	0.00320233			docosapentaenoate (n3 DPA; 22:5n3)	eicosenoate (20:1n9 or 11)	0.00320233
1478	140	146	0.00320271			2-arachidonoylglycerophosphoethanolamine*	nicotinamide	0.00320271
1479	295	299	0.00320532			choline	cys-gly, oxidized	0.00320532
1480	39	138	0.00320581			palmitoyl sphingomyelin	pelargonate (9:0)	0.00320581
1481	214	251	0.00320766			1-stearoylglycerol (1-monostearin)	cholestanol	0.00320766
1482	41	373	0.00320941			histidine	lysine	0.00320941
1483	86	136	0.00321077			1-stearoylglycerophosphoethanolamine	xylitol	0.00321077
1484	60	76	0.00321672			5-methylthioadenosine (MTA)	C-glycosyltryptophan*	0.00321672
1485	64	167	0.00321818			2-hydroxystearate	3-hydroxybutyrate (BHBA)	0.00321818
1486	321	362	0.00322182			2-methylbutyrylcarnitine (C5)	ergothioneine	0.00322182
1487	74	333	0.00322202			pseudouridine	uracil	0.00322202
1488	242	244	0.00322452			3-dehydrocarnitine*	serylleucine	0.00322452
1489	131	359	0.00322463			leucylglutamate	leucylmethionine	0.00322463
1490	104	170	0.00322487			campesterol	tryptophan	0.00322487
1491	182	201	0.00322865			alanine	erythronate*	0.00322865
1492	150	373	0.00322913			gamma-glutamylleucine	glycerophosphorylcholine (GPC)	0.00322913
1493	200	350	0.00323362			cytidine	xylitol	0.00323362
1494	38	357	0.00324134			glycerol 3-phosphate (G3P)	threonate	0.00324134
1495	231	309	0.00324748			1-palmitoylplasmenylethanolamine*	trans-4-hydroxyproline	0.00324748
1496	260	271	0.00324859			isoleucylalanine	phenylalanylserine	0.00324859
1497	150	318	0.00324887			methionine	N6-acetyllysine	0.00324887
1498	42	202	0.00324972			cytidine	prostaglandin A2	0.00324972
1499	119	362	0.00325284			1-stearoylglycerophosphoinositol	glycine	0.00325284
1500	239	256	0.00325383			asparagine	uracil	0.00325383
1501	197	212	0.00325389			laurate (12:0)	mannose	0.00325389
1502	139	255	0.0032542			glycerate	hippurate	0.0032542
1503	138	255	0.00325647			cholesterol	mannitol	0.00325647
1504	276	362	0.00325765			cholestanol	mannitol	0.00325765
1505	281	363	0.00326216			N-acetylmethionine	uracil	0.00326216
1506	48	239	0.00326515			nervonate (24:1n9)	urate	0.00326515
1507	251	271	0.00327183			2-arachidonoylglycerophosphoethanolamine*	laurate (12:0)	0.00327183
1508	44	273	0.00327304			lysine	N6-acetyllysine	0.00327304
1509	321	351	0.00327651			1-stearoylplasmenylethanolamine*	N-acetylaspartate (NAA)	0.00327651
1510	186	188	0.00327832			pseudouridine	threonine	0.00327832
1511	325	359	0.00328236			gamma-glutamyltryptophan	gamma-glutamylvaline	0.00328236
1512	39	260	0.00328311			riboflavin (Vitamin B2)	tryptophan	0.00328311
1513	176	295	0.00328557			1-stearoylglycerol (1-monostearin)	methionine	0.00328557
1514	182	274	0.00329109			fumarate	palmitoyl sphingomyelin	0.00329109
1515	311	364	0.00329236			gamma-glutamylleucine	N-acetyl-aspartyl-glutamate (NAAG)	0.00329236
1516	178	264	0.00329261			phosphate	urea	0.00329261
1517	14	314	0.00329507			gamma-aminobutyrate (GABA)	methylphosphate	0.00329507
1518	108	168	0.00329772			1-docosahexaenoylglycerophosphoethanolamine*	pipecolate	0.00329772
1519	34	201	0.0032984			allantoin	erucate (22:1n9)	0.0032984
1520	45	325	0.00329847			1-palmitoylglycerol (1-monopalmitin)	glycerophosphorylcholine (GPC)	0.00329847
1521	332	350	0.00330883			2-aminoadipate	riboflavin (Vitamin B2)	0.00330883
1522	34	274	0.00330902			serine	threonate	0.00330902
1523	131	311	0.00331649			1-palmitoylglycerol (1-monopalmitin)	N-acetyl-aspartyl-glutamate (NAAG)	0.00331649
1524	94	98	0.00331706			campesterol	phosphate	0.00331706
1525	118	125	0.00331832			acetylphosphate	adenosine 2'-monophosphate (2'-AMP)	0.00331832
1526	153	354	0.00331834			ascorbate (Vitamin C)	beta-alanine	0.00331834
1527	139	257	0.00331952			cytidine-3'-monophosphate (3'-CMP)	thromboxane B2	0.00331952
1528	41	272	0.00332017			cholesterol	mannose-6-phosphate	0.00332017
1529	76	86	0.00332217			1-stearoylglycerophosphoethanolamine	N-acetylalanine	0.00332217
1530	174	373	0.00332356			3-hydroxybutyrate (BHBA)	5-methylthioadenosine (MTA)	0.00332356
1531	111	138	0.00332638			fructose-6-phosphate	xylitol	0.00332638
1532	45	192	0.00332743			alpha-tocopherol	cholestanol	0.00332743
1533	44	314	0.00332879			2-aminoadipate	glutamate, gamma-methyl ester	0.00332879
1534	96	257	0.00333241			1-stearoylplasmenylethanolamine*	pipecolate	0.00333241
1535	139	201	0.003349			adenine	mannose-6-phosphate	0.003349
1536	131	305	0.00335131			cholesterol	glycerophosphorylcholine (GPC)	0.00335131
1537	231	242	0.00335206			campesterol	phenylalanine	0.00335206
1538	35	57	0.00335254			isoleucylalanine	leucylglutamate	0.00335254
1539	138	170	0.00335679			1-palmitoylglycerophosphocholine (16:0)	2-eicosapentaenoylglycerophosphoethanolamine*	0.00335679
1540	104	276	0.00335961			cholestanol	erythronate*	0.00335961
1541	41	86	0.0033644			alanine	N-acetylmethionine	0.0033644
1542	131	240	0.00337231			1-stearoylglycerophosphoethanolamine	5-methylthioadenosine (MTA)	0.00337231
1543	136	331	0.00337346			campesterol	leucine	0.00337346
1544	170	311	0.00337467			C-glycosyltryptophan*	sedoheptulose-7-phosphate	0.00337467
1545	244	353	0.00337626			erythronate*	phosphate	0.00337626
1546	121	368	0.0033776			leucylmethionine	threonylphenylalanine	0.0033776
1547	187	372	0.00338735			aspartate	valine	0.00338735
1548	116	372	0.00338786			gamma-glutamyltyrosine	xanthosine	0.00338786
1549	237	371	0.0033888			arachidonate (20:4n6)	xanthosine	0.0033888
1550	139	295	0.00338938			lactate	xanthine	0.00338938
1551	94	311	0.00339355			cholesterol	palmitoyl sphingomyelin	0.00339355
1552	131	368	0.00339483			acetylphosphate	phosphate	0.00339483
1553	86	205	0.003399			campesterol	valine	0.003399
1554	68	127	0.00340083			5-methylthioadenosine (MTA)	glycylproline	0.00340083
1555	59	248	0.00340269			2-oleoylglycerophosphoserine*	beta-sitosterol	0.00340269
1556	279	304	0.00340305			2-hydroxypalmitate	lignocerate (24:0)	0.00340305
1557	95	325	0.00340729			N-acetylthreonine	phenylacetylglycine	0.00340729
1558	256	280	0.00340868			Ac-Ser-Asp-Lys-Pro-OH	riboflavin (Vitamin B2)	0.00340868
1559	86	150	0.00340946			mannose	N-delta-acetylornithine*	0.00340946
1560	174	214	0.00341333			5-methylthioadenosine (MTA)	cytidine	0.00341333
1561	125	365	0.00341418			fructose-6-phosphate	histidine	0.00341418
1562	174	191	0.00341715			beta-alanine	uridine	0.00341715
1563	251	351	0.00341843			fructose-6-phosphate	glutamate	0.00341843
1564	38	272	0.00341852			lysine	threonine	0.00341852
1565	32	76	0.00342091			1-palmitoylplasmenylethanolamine*	N-acetylalanine	0.00342091
1566	302	326	0.00342289			1-oleoylplasmenylethanolamine*	3-hydroxybutyrate (BHBA)	0.00342289
1567	139	190	0.00342342			phenol sulfate	ribose	0.00342342
1568	32	356	0.00342851			cholesterol	glucose-6-phosphate (G6P)	0.00342851
1569	12	17	0.00342852			1-oleoylplasmenylethanolamine*	thymine	0.00342852
1570	272	351	0.0034293			1-dihomo-linoleoylglycerophosphocholine (20:2n6)*	1-eicosenoylglycerophosphocholine (20:1n9)*	0.0034293
1571	239	351	0.00343083			N-acetylalanine	threonine	0.00343083
1572	139	180	0.00343585			laurate (12:0)	threonine	0.00343585
1573	204	232	0.00343711			cholesterol	gamma-glutamylglutamate	0.00343711
1574	272	371	0.00344038			glycylleucine	isoleucylaspartate	0.00344038
1575	273	280	0.00345019			N-acetylalanine	xanthine	0.00345019
1576	174	192	0.00345095			N-acetylaspartate (NAA)	N-delta-acetylornithine*	0.00345095
1577	81	343	0.00345111			fructose-6-phosphate	glutamate, gamma-methyl ester	0.00345111
1578	119	216	0.00345185			4-guanidinobutanoate	stearoyl sphingomyelin	0.00345185
1579	255	305	0.00345403			asparagine	homoserine	0.00345403
1580	171	180	0.00345505			mannitol	phenylalanine	0.00345505
1581	10	355	0.00345797			ethanolamine	gamma-glutamylglutamate	0.00345797
1582	240	283	0.00346262			1-arachidonoylglycerophosphoethanolamine*	thymidine	0.00346262
1583	140	186	0.00346348			leucine	nicotinamide	0.00346348
1584	324	332	0.00346672			choline	gamma-glutamyltryptophan	0.00346672
1585	48	136	0.0034692			ribitol	serine	0.0034692
1586	225	275	0.00347073			2-arachidonoylglycerophosphoethanolamine*	C-glycosyltryptophan*	0.00347073
1587	10	136	0.00347157			inositol 1-phosphate (I1P)	N-acetylglucosamine 6-phosphate	0.00347157
1588	214	230	0.00347428			1-arachidonoylglycerophosphoethanolamine*	C-glycosyltryptophan*	0.00347428
1589	109	309	0.0034817			histidine	isoleucine	0.0034817
1590	102	364	0.00348302			alpha-glutamyltyrosine	phenylalanylserine	0.00348302
1591	194	245	0.00348873			adrenate (22:4n6)	urea	0.00348873
1592	271	368	0.00349314			glutamine-leucine	leucylserine	0.00349314
1593	77	197	0.00349397			N6-acetyllysine	valine	0.00349397
1594	4	126	0.00349872			3-indoxyl sulfate	glycerate	0.00349872
1595	42	139	0.00350012			12-HETE	betaine	0.00350012
1596	39	279	0.00350166			1-stearoylglycerophosphoinositol	cholesterol	0.00350166
1597	283	368	0.00350214			1-stearoylglycerol (1-monostearin)	N-acetylthreonine	0.00350214
1598	264	332	0.00350261			nicotinamide	valine	0.00350261
1599	121	331	0.00350877			methylphosphate	serine	0.00350877
1600	66	127	0.00350995			aspartate	sedoheptulose-7-phosphate	0.00350995
1601	174	216	0.00352248			2-oleoylglycerophosphoethanolamine*	beta-sitosterol	0.00352248
1602	10	190	0.00352312			fructose-6-phosphate	homoserine	0.00352312
1603	176	321	0.0035245			1-arachidonoylglycerophosphoethanolamine*	glucose-6-phosphate (G6P)	0.0035245
1604	163	187	0.00352645			fumarate	pseudouridine	0.00352645
1605	107	322	0.00352688			docosapentaenoate (n6 DPA; 22:5n6)	gamma-glutamyltyrosine	0.00352688
1606	1	259	0.00353173			alanylphenylalanine	putrescine	0.00353173
1607	125	305	0.00353379			1,5-anhydroglucitol (1,5-AG)	mead acid (20:3n9)	0.00353379
1608	239	331	0.00353839			beta-alanine	phenylalanine	0.00353839
1609	9	359	0.00354087			laurate (12:0)	sedoheptulose-7-phosphate	0.00354087
1610	46	342	0.00354157			1-arachidonoylglycerophosphocholine (20:4n6)*	tryptophan	0.00354157
1611	172	277	0.0035482			2-aminobutyrate	stearidonate (18:4n3)	0.0035482
1612	190	332	0.00355081			flavin adenine dinucleotide (FAD)	N-acetylneuraminate	0.00355081
1613	145	194	0.00355452			glucose-6-phosphate (G6P)	serine	0.00355452
1614	214	358	0.00355546			creatine	glutamine-leucine	0.00355546
1615	179	372	0.00355549			histidine	trans-urocanate	0.00355549
1616	32	134	0.00355739			gamma-glutamylalanine	xanthosine	0.00355739
1617	42	119	0.00355752			1-oleoylplasmenylethanolamine*	carnosine	0.00355752
1618	9	332	0.00356146			1-stearoylglycerophosphoinositol	asparagine	0.00356146
1619	10	230	0.00356272			1-arachidonoylglycerophosphocholine (20:4n6)*	serine	0.00356272
1620	192	316	0.00356389			1-arachidonoylglycerophosphoethanolamine*	isoleucine	0.00356389
1621	230	329	0.00356481			glutamate, gamma-methyl ester	proline	0.00356481
1622	68	102	0.00356569			isoleucine	sarcosine (N-Methylglycine)	0.00356569
1623	34	138	0.00356636			2-oleoylglycerophosphoserine*	adrenate (22:4n6)	0.00356636
1624	186	365	0.0035678			1-palmitoylglycerol (1-monopalmitin)	cholestanol	0.0035678
1625	9	202	0.0035679			gamma-glutamyltryptophan	uridine	0.0035679
1626	176	272	0.00357012			1-arachidonoylglycerophosphocholine (20:4n6)*	glycine	0.00357012
1627	59	77	0.00357015			fumarate	N-acetylalanine	0.00357015
1628	86	257	0.00357336			2-hydroxypalmitate	3-indoxyl sulfate	0.00357336
1629	170	256	0.00357362			5-methylthioadenosine (MTA)	mannose-6-phosphate	0.00357362
1630	171	201	0.00357563			erythronate*	mannose	0.00357563
1631	86	351	0.00357658			ethanolamine	glycerophosphorylcholine (GPC)	0.00357658
1632	170	212	0.00357722			5-methylthioadenosine (MTA)	threonine	0.00357722
1633	13	131	0.00358113			erythronate*	hippurate	0.00358113
1634	96	335	0.00358224			1-docosahexaenoylglycerophosphocholine (22:6n3)*	campesterol	0.00358224
1635	65	131	0.00358386			adenine	sorbitol	0.00358386
1636	160	202	0.00358424			2-oleoylglycerophosphocholine*	campesterol	0.00358424
1637	176	325	0.00359059			dimethylarginine (SDMA + ADMA)	glycine	0.00359059
1638	219	245	0.0035937			fumarate	riboflavin (Vitamin B2)	0.0035937
1639	199	240	0.0036019			hydroxyisovaleroyl carnitine	leucylserine	0.0036019
1640	119	139	0.00360523			glycerol 2-phosphate	leucine	0.00360523
1641	271	329	0.00360749			asparagine	cholesterol	0.00360749
1642	76	357	0.00360879			N6-acetyllysine	sarcosine (N-Methylglycine)	0.00360879
1643	71	275	0.00361146			3-hydroxybutyrate (BHBA)	trans-4-hydroxyproline	0.00361146
1644	10	359	0.00361458			2-palmitoylglycerophosphoethanolamine*	N-acetylglucosamine 6-phosphate	0.00361458
1645	177	259	0.00361531			1-arachidonoylglycerophosphoethanolamine*	tryptophan	0.00361531
1646	96	202	0.00362247			galactose	mead acid (20:3n9)	0.00362247
1647	42	357	0.00362541			adenine	glycine	0.00362541
1648	136	295	0.00362654			1-stearoylglycerophosphoinositol	trans-4-hydroxyproline	0.00362654
1649	20	114	0.00362664			C-glycosyltryptophan*	palmitoyl sphingomyelin	0.00362664
1650	92	134	0.00362822			1-linoleoylglycerol (1-monolinolein)	arabitol	0.00362822
1651	202	321	0.00362863			9,10-DiHOME	carnosine	0.00362863
1652	279	351	0.00362905			glycine	pseudouridine	0.00362905
1653	284	364	0.00363084			N-acetylthreonine	threonine	0.00363084
1654	98	350	0.00363658			nicotinamide adenine dinucleotide (NAD+)	urea	0.00363658
1655	125	188	0.00364087			adenosine 2'-monophosphate (2'-AMP)	threonate	0.00364087
1656	42	279	0.00364745			beta-alanine	gamma-glutamylvaline	0.00364745
1657	102	274	0.00365087			1-stearoylglycerophosphoinositol	N-acetylthreonine	0.00365087
1658	252	315	0.00365098			adrenate (22:4n6)	N-acetyl-aspartyl-glutamate (NAAG)	0.00365098
1659	31	114	0.00365135			malate	pro-hydroxy-pro	0.00365135
1660	31	138	0.00365501			1-oleoylglycerophosphoserine	arabitol	0.00365501
1661	100	240	0.00365577			1-oleoylglycerophosphoserine	cholestanol	0.00365577
1662	173	351	0.00365801			adenosine 5'diphosphoribose	leucine	0.00365801
1663	199	360	0.00366114			fructose	threonine	0.00366114
1664	121	191	0.00366351			glycerol 2-phosphate	tyrosine	0.00366351
1665	104	119	0.00366496			aspartate	glutamate	0.00366496
1666	26	34	0.00366595			alanine	asparagine	0.00366595
1667	128	129	0.0036676			1-oleoylglycerol (1-monoolein)	1-palmitoylglycerol (1-monopalmitin)	0.0036676
1668	74	109	0.00367875			bilirubin (Z,Z)	biliverdin	0.00367875
1669	65	199	0.00367953			3-dehydrocarnitine*	alpha-glutamyltyrosine	0.00367953
1670	139	357	0.00367958			2-oleoylglycerophosphocholine*	glycerol 2-phosphate	0.00367958
1671	190	316	0.0036806			cholesterol	trans-4-hydroxyproline	0.0036806
1672	173	326	0.00368285			glucose-6-phosphate (G6P)	proline	0.00368285
1673	199	368	0.00368399			fructose	ribose	0.00368399
1674	302	335	0.00368561			glycerol 2-phosphate	valine	0.00368561
1675	9	48	0.00368735			phenol sulfate	sorbitol	0.00368735
1676	243	353	0.00369636			1-arachidonoylglycerophosphocholine (20:4n6)*	2-arachidonoylglycerophosphoethanolamine*	0.00369636
1677	44	252	0.00369882			leucylglycine	threonylphenylalanine	0.00369882
1678	226	262	0.00370044			1-stearoylplasmenylethanolamine*	malate	0.00370044
1679	160	332	0.00370081			Isobar: betaine aldehyde, N-methyldiethanolamine	methionylphenylalanine	0.00370081
1680	42	96	0.00370299			dimethylarginine (SDMA + ADMA)	serine	0.00370299
1681	96	362	0.00370854			1-stearoylglycerophosphoinositol	adenine	0.00370854
1682	173	239	0.00370938			adenine	uracil	0.00370938
1683	32	272	0.00371156			fructose	laurate (12:0)	0.00371156
1684	111	324	0.00371232			1-oleoylplasmenylethanolamine*	N-acetylalanine	0.00371232
1685	275	276	0.00371242			alpha-tocopherol	ribitol	0.00371242
1686	272	316	0.00371249			N-acetylglucosamine 6-phosphate	N-acetylmethionine	0.00371249
1687	48	160	0.00371493			N-acetylalanine	proline	0.00371493
1688	192	271	0.00371556			2-arachidonoylglycerophosphoethanolamine*	dimethylarginine (SDMA + ADMA)	0.00371556
1689	39	237	0.00371782			glutamate, gamma-methyl ester	N6-acetyllysine	0.00371782
1690	200	325	0.00371797			1-stearoylglycerol (1-monostearin)	lactate	0.00371797
1691	325	364	0.00372387			glycerol 3-phosphate (G3P)	riboflavin (Vitamin B2)	0.00372387
1692	34	180	0.00372461			riboflavin (Vitamin B2)	urea	0.00372461
1693	78	208	0.00372535			1-palmitoylglycerol (1-monopalmitin)	gamma-glutamylglutamate	0.00372535
1694	136	276	0.00372956			3-phosphoglycerate	gulono-1,4-lactone	0.00372956
1695	116	127	0.00372966			C-glycosyltryptophan*	N-acetylmethionine	0.00372966
1696	13	290	0.00373034			arachidonate (20:4n6)	beta-sitosterol	0.00373034
1697	44	197	0.0037306			1-docosahexaenoylglycerophosphocholine (22:6n3)*	ornithine	0.0037306
1698	96	316	0.00373158			1-stearoylplasmenylethanolamine*	glycerate	0.00373158
1699	48	358	0.0037323			adenine	proline	0.0037323
1700	182	200	0.0037365			2-arachidonoylglycerophosphoethanolamine*	trans-urocanate	0.0037365
1701	358	368	0.00373741			gamma-glutamylleucine	glycerol 3-phosphate (G3P)	0.00373741
1702	245	350	0.00374323			trans-urocanate	valine	0.00374323
1703	45	357	0.00374704			leucylserine	threonate	0.00374704
1704	76	174	0.0037523			2-aminoadipate	trans-4-hydroxyproline	0.0037523
1705	246	247	0.00375652			3-hydroxybutyrate (BHBA)	fructose-6-phosphate	0.00375652
1706	235	241	0.00375962			leucylthreonine	leu-leu-leu	0.00375962
1707	116	169	0.00376079			isovalerylcarnitine	leucylalanine	0.00376079
1708	177	179	0.00376463			arachidonate (20:4n6)	erythritol	0.00376463
1709	24	35	0.00376604			galactose	gamma-glutamylalanine	0.00376604
1710	32	271	0.0037668			1-margaroylglycerophosphocholine (17:0)	1-palmitoylglycerophosphocholine (16:0)	0.0037668
1711	187	274	0.00376707			1-oleoylplasmenylethanolamine*	N6-acetyllysine	0.00376707
1712	199	230	0.00376868			gamma-glutamyltyrosine	N-acetyl-aspartyl-glutamate (NAAG)	0.00376868
1713	95	305	0.00377673			glycerol 2-phosphate	isoleucine	0.00377673
1714	272	358	0.00377836			Ac-Ser-Asp-Lys-Pro-OH	phenylalanine	0.00377836
1715	271	360	0.00378103			N-acetylalanine	trans-urocanate	0.00378103
1716	311	316	0.00378228			N6-acetyllysine	tyrosine	0.00378228
1717	175	188	0.00378236			phosphate	proline	0.00378236
1718	136	202	0.0037839			fucose	gamma-glutamylvaline	0.0037839
1719	290	359	0.0037863			C-glycosyltryptophan*	glycine	0.0037863
1720	173	359	0.00378706			ornithine	tryptophan	0.00378706
1721	272	295	0.0037942			fructose	tryptophan	0.0037942
1722	118	283	0.00379519			N-acetylalanine	palmitoyl sphingomyelin	0.00379519
1723	216	295	0.00379737			ascorbate (Vitamin C)	nicotinamide	0.00379737
1724	109	231	0.00379925			homoserine	palmitoyl sphingomyelin	0.00379925
1725	178	201	0.00380036			alpha-glutamyltyrosine	isoleucylalanine	0.00380036
1726	95	240	0.0038026			gamma-aminobutyrate (GABA)	glycerophosphorylcholine (GPC)	0.0038026
1727	153	208	0.00380526			Ac-Ser-Asp-Lys-Pro-OH	leucine	0.00380526
1728	29	197	0.00380949			cytidine-3'-monophosphate (3'-CMP)	gulono-1,4-lactone	0.00380949
1729	104	121	0.00382218			1-oleoylglycerophosphoglycerol*	glycerate	0.00382218
1730	127	201	0.00382598			alanine	aspartate	0.00382598
1731	180	182	0.00382677			beta-sitosterol	glycerophosphorylcholine (GPC)	0.00382677
1732	74	122	0.00383093			gamma-glutamylglutamate	gamma-glutamylleucine	0.00383093
1733	13	316	0.00383457			3-dehydrocarnitine*	aspartylleucine	0.00383457
1734	139	264	0.00383533			1-docosahexaenoylglycerophosphocholine (22:6n3)*	proline	0.00383533
1735	121	362	0.00383586			cholesterol	methylphosphate	0.00383586
1736	98	333	0.00384061			aspartate	uracil	0.00384061
1737	255	295	0.0038408			adenosine 2'-monophosphate (2'-AMP)	serylleucine	0.0038408
1738	94	136	0.00384898			mannitol	palmitoyl sphingomyelin	0.00384898
1739	182	325	0.00384914			acetylphosphate	C-glycosyltryptophan*	0.00384914
1740	27	69	0.00385196			gamma-glutamylleucine	riboflavin (Vitamin B2)	0.00385196
1741	260	304	0.00385936			1-oleoylglycerophosphocholine (18:1)	2-palmitoylglycerol (2-monopalmitin)	0.00385936
1742	305	316	0.00386429			methionine	phenylacetylglycine	0.00386429
1743	131	201	0.00386433			phenylalanine	proline	0.00386433
1744	173	237	0.00386464			campesterol	glycerophosphorylcholine (GPC)	0.00386464
1745	71	127	0.00386729			fructose	lactate	0.00386729
1746	98	246	0.00386958			2-palmitoylglycerophosphoethanolamine*	beta-sitosterol	0.00386958
1747	176	329	0.00387157			adenosine 2'-monophosphate (2'-AMP)	leucylthreonine	0.00387157
1748	160	373	0.00387583			fumarate	sarcosine (N-Methylglycine)	0.00387583
1749	316	326	0.00387971			dimethylarginine (SDMA + ADMA)	xylitol	0.00387971
1750	4	89	0.00388164			proline	ribose	0.00388164
1751	260	264	0.00388192			12-HETE	6-keto prostaglandin F1alpha	0.00388192
1752	305	321	0.00388399			methionine	methylphosphate	0.00388399
1753	131	362	0.00388593			phenylalanine	pseudouridine	0.00388593
1754	13	42	0.00388611			campesterol	uracil	0.00388611
1755	20	36	0.00388739			1-docosahexaenoylglycerophosphocholine (22:6n3)*	1-stearoylglycerophosphoinositol	0.00388739
1756	138	325	0.00388966			1-linoleoylglycerol (1-monolinolein)	1-palmitoylglycerophosphoethanolamine	0.00388966
1757	39	282	0.00389001			cholestanol	riboflavin (Vitamin B2)	0.00389001
1758	131	180	0.0038935			1-stearoylglycerol (1-monostearin)	N-glycolylneuraminate	0.0038935
1759	178	364	0.00390068			campesterol	gamma-glutamylglutamate	0.00390068
1760	230	299	0.00390356			gamma-aminobutyrate (GABA)	urea	0.00390356
1761	11	295	0.0039075			isoleucine	pelargonate (9:0)	0.0039075
1762	45	271	0.0039143			1-arachidonoylglycerophosphoinositol*	palmitoyl sphingomyelin	0.0039143
1763	71	225	0.00391463			2-aminoadipate	N6-acetyllysine	0.00391463
1764	321	368	0.00391576			2-palmitoylglycerophosphoethanolamine*	inositol 1-phosphate (I1P)	0.00391576
1765	108	169	0.00391762			pseudouridine	valine	0.00391762
1766	334	352	0.00391857			allantoin	erythritol	0.00391857
1767	39	295	0.00391931			serylphenyalanine	threonylleucine	0.00391931
1768	121	240	0.00392021			1-stearoylglycerol (1-monostearin)	palmitoyl sphingomyelin	0.00392021
1769	231	369	0.00392126			aspartate	leucine	0.00392126
1770	49	374	0.00392408			isoleucylalanine	valylphenylalanine	0.00392408
1771	89	153	0.00392865			2'-deoxyadenosine 3'-monophosphate	xylulose	0.00392865
1772	221	318	0.00393172			6-keto prostaglandin F1alpha	cytidine-3'-monophosphate (3'-CMP)	0.00393172
1773	53	81	0.00393296			hypoxanthine	prostaglandin A2	0.00393296
1774	31	102	0.0039357			2'-deoxyinosine	4-guanidinobutanoate	0.0039357
1775	86	357	0.00393869			1-oleoylglycerophosphoserine	adrenate (22:4n6)	0.00393869
1776	173	191	0.00393911			5-methylthioadenosine (MTA)	trans-4-hydroxyproline	0.00393911
1777	216	357	0.00394166			fructose	glutamate	0.00394166
1778	245	370	0.00394199			homoserine	trans-4-hydroxyproline	0.00394199
1779	111	274	0.00394654			leucylserine	valylserine	0.00394654
1780	34	199	0.0039496			alpha-tocopherol	N-acetyl-aspartyl-glutamate (NAAG)	0.0039496
1781	60	174	0.00395459			1-palmitoylglycerol (1-monopalmitin)	glycerol 2-phosphate	0.00395459
1782	100	202	0.00395636			2-hydroxystearate	fructose-6-phosphate	0.00395636
1783	98	331	0.00395925			adenosine 5'diphosphoribose	glycine	0.00395925
1784	217	353	0.00395934			adenosine 2'-monophosphate (2'-AMP)	sedoheptulose-7-phosphate	0.00395934
1785	65	225	0.00396321			homostachydrine*	threonylphenylalanine	0.00396321
1786	243	352	0.00396835			2-oleoylglycerophosphocholine*	inositol 1-phosphate (I1P)	0.00396835
1787	290	316	0.0039685			leucylglycine	threonylleucine	0.0039685
1788	10	272	0.00396968			ornithine	proline	0.00396968
1789	230	331	0.00397318			1-arachidonoylglycerophosphoethanolamine*	N-acetylalanine	0.00397318
1790	316	359	0.00397378			isoleucine	sedoheptulose-7-phosphate	0.00397378
1791	37	313	0.00397908			proline	tryptophan	0.00397908
1792	45	311	0.00398129			1-palmitoylglycerophosphoinositol*	phosphoethanolamine	0.00398129
1793	329	359	0.00398339			2-aminoadipate	phosphate	0.00398339
1794	174	316	0.00398598			sarcosine (N-Methylglycine)	tryptophan	0.00398598
1795	131	295	0.00399158			fructose-6-phosphate	proline	0.00399158
1796	106	246	0.00399252			campesterol	palmitoyl sphingomyelin	0.00399252
1797	38	290	0.00399857			alanylleucine	leucylthreonine	0.00399857
1798	202	358	0.00399868			1-palmitoylplasmenylethanolamine*	ornithine	0.00399868
1799	1	184	0.00400167			glycine	trans-urocanate	0.00400167
1800	42	191	0.00400354			1,5-anhydroglucitol (1,5-AG)	gamma-glutamylphenylalanine	0.00400354
1801	134	197	0.00400434			1-stearoylglycerophosphoinositol	glutamate	0.00400434
1802	283	360	0.00400497			carnosine	glycerate	0.00400497
1803	255	368	0.00400523			nicotinamide	tyrosine	0.00400523
1804	38	326	0.00400962			mannitol	valine	0.00400962
1805	77	212	0.00401039			1-palmitoylplasmenylethanolamine*	ribose	0.00401039
1806	42	131	0.00401318			3-indoxyl sulfate	hippurate	0.00401318
1807	71	311	0.00401832			1-stearoylglycerophosphoinositol	campesterol	0.00401832
1808	178	365	0.0040193			2-palmitoylglycerophosphoethanolamine*	phosphate	0.0040193
1809	38	212	0.00401961			gamma-aminobutyrate (GABA)	uridine	0.00401961
1810	45	362	0.00402023			1-palmitoylplasmenylethanolamine*	hippurate	0.00402023
1811	201	276	0.00402281			2-aminoadipate	uracil	0.00402281
1812	119	331	0.00402619			glycerophosphorylcholine (GPC)	N-acetylmethionine	0.00402619
1813	192	359	0.00403266			asparagine	sedoheptulose-7-phosphate	0.00403266
1814	199	202	0.0040327			glutamate, gamma-methyl ester	tryptophan	0.0040327
1815	185	187	0.00403589			glycerol 2-phosphate	glycine	0.00403589
1816	28	158	0.00403602			gamma-glutamylthreonine*	gamma-glutamyltyrosine	0.00403602
1817	332	362	0.00403846			1-oleoylglycerophosphoethanolamine	dihomo-linolenate (20:3n3 or n6)	0.00403846
1818	192	237	0.00404386			serine	uracil	0.00404386
1819	163	186	0.00404922			glutamate, gamma-methyl ester	lactate	0.00404922
1820	86	371	0.00405707			docosapentaenoate (n6 DPA; 22:5n6)	gamma-glutamyltryptophan	0.00405707
1821	191	357	0.00405951			5-methylthioadenosine (MTA)	xanthine	0.00405951
1822	125	276	0.00406279			glutamate	trans-4-hydroxyproline	0.00406279
1823	66	102	0.00407051			beta-alanine	N-acetylmethionine	0.00407051
1824	152	166	0.00407149			2-oleoylglycerophosphoethanolamine*	adrenate (22:4n6)	0.00407149
1825	302	304	0.00407173			cytidine 5'-monophosphate (5'-CMP)	equol sulfate	0.00407173
1826	153	320	0.00407186			phenol sulfate	phenylacetylglycine	0.00407186
1827	73	222	0.00407628			cytidine-3'-monophosphate (3'-CMP)	prostaglandin E2	0.00407628
1828	316	331	0.00407668			3-(4-hydroxyphenyl)lactate	indolelactate	0.00407668
1829	131	316	0.00407946			proline	sedoheptulose-7-phosphate	0.00407946
1830	216	356	0.00407951			campesterol	proline	0.00407951
1831	100	368	0.004081			homoserine	thymine	0.004081
1832	125	372	0.00408301			adenosine 5'diphosphoribose	valine	0.00408301
1833	125	138	0.00408336			beta-alanine	xanthosine	0.00408336
1834	76	218	0.00409142			beta-alanine	cholestanol	0.00409142
1835	191	199	0.00409451			3-hydroxybutyrate (BHBA)	hydroxybutyrylcarnitine*	0.00409451
1836	94	121	0.00409613			glutamate	glycerol 2-phosphate	0.00409613
1837	100	282	0.00409619			acetylphosphate	aspartate	0.00409619
1838	48	199	0.00409799			adenosine 5'diphosphoribose	N-glycolylneuraminate	0.00409799
1839	216	355	0.00409965			2-arachidonoylglycerophosphoethanolamine*	glycerol 2-phosphate	0.00409965
1840	18	299	0.00410438			homoserine	thymidine	0.00410438
1841	199	304	0.00411153			1-hexadecanol	pelargonate (9:0)	0.00411153
1842	191	329	0.00411182			glycerol 2-phosphate	phenylacetylglycine	0.00411182
1843	334	353	0.00411261			glutamate	sarcosine (N-Methylglycine)	0.00411261
1844	96	295	0.00411286			serylphenyalanine	threonylphenylalanine	0.00411286
1845	141	235	0.00411559			adenine	palmitoyl sphingomyelin	0.00411559
1846	212	256	0.00411651			choline phosphate	isovalerylcarnitine	0.00411651
1847	107	244	0.0041169			hippurate	mannose	0.0041169
1848	32	135	0.00412364			alanylphenylalanine	leucylmethionine	0.00412364
1849	95	364	0.00412415			1-oleoylplasmenylethanolamine*	catechol sulfate	0.00412415
1850	136	332	0.00412493			Ac-Ser-Asp-Lys-Pro-OH	urea	0.00412493
1851	220	307	0.00412591			C-glycosyltryptophan*	serine	0.00412591
1852	104	125	0.00412628			hypotaurine	phenylalanylaspartate	0.00412628
1853	225	276	0.00413699			alanine	beta-alanine	0.00413699
1854	191	331	0.00413843			inositol 1-phosphate (I1P)	N-acetylmethionine	0.00413843
1855	92	252	0.00413913			glutamate	sedoheptulose-7-phosphate	0.00413913
1856	255	283	0.00414141			9,10-DiHOME	malate	0.00414141
1857	199	332	0.0041427			mannitol	nicotinamide	0.0041427
1858	45	295	0.00414517			glycerol 2-phosphate	serine	0.00414517
1859	107	219	0.00414856			2-aminoadipate	palmitoyl sphingomyelin	0.00414856
1860	230	332	0.00414974			alanylphenylalanine	hydroxyisovaleroyl carnitine	0.00414974
1861	202	304	0.00415293			isoleucine	serine	0.00415293
1862	107	245	0.00415754			glycine	phenylacetylglycine	0.00415754
1863	192	264	0.00415881			alanylphenylalanine	leucylserine	0.00415881
1864	109	322	0.00416551			glutamate, gamma-methyl ester	methylphosphate	0.00416551
1865	358	359	0.00416742			alpha-glutamyltyrosine	putrescine	0.00416742
1866	271	359	0.00416917			trans-urocanate	tryptophan	0.00416917
1867	358	360	0.00417551			N6-acetyllysine	tryptophan	0.00417551
1868	276	324	0.00417672			trans-urocanate	tyrosine	0.00417672
1869	329	351	0.00417698			N-acetylmethionine	ribitol	0.00417698
1870	95	311	0.00418216			sarcosine (N-Methylglycine)	threonine	0.00418216
1871	42	335	0.00418987			Ac-Ser-Asp-Lys-Pro-OH	phosphate	0.00418987
1872	95	125	0.00419062			1-stearoylglycerophosphoinositol	sorbitol	0.00419062
1873	118	182	0.0041938			Ac-Ser-Asp-Lys-Pro-OH	beta-alanine	0.0041938
1874	10	96	0.0041986			ascorbate (Vitamin C)	gamma-glutamylleucine	0.0041986
1875	100	119	0.0041995			1-arachidonoylglycerophosphoethanolamine*	adenine	0.0041995
1876	85	140	0.00420037			adenosine 5'diphosphoribose	asparagine	0.00420037
1877	127	166	0.00420049			5-methyltetrahydrofolate (5MeTHF)	choline	0.00420049
1878	60	150	0.00420885			beta-sitosterol	equol sulfate	0.00420885
1879	188	372	0.00420933			2-hydroxystearate	cytidine	0.00420933
1880	54	79	0.00421063			gamma-glutamylvaline	xanthosine	0.00421063
1881	242	246	0.00421201			2-docosahexaenoylglycerophosphocholine*	3-sialyllactose	0.00421201
1882	119	290	0.00421372			leucylglutamate	leucylthreonine	0.00421372
1883	141	229	0.00421752			asparagine	ornithine	0.00421752
1884	121	355	0.00421767			choline phosphate	isobutyrylcarnitine	0.00421767
1885	138	230	0.00421781			aspartate	thymidine	0.00421781
1886	167	334	0.00422263			cholestanol	isoleucine	0.00422263
1887	219	242	0.00422309			ergothioneine	serylphenyalanine	0.00422309
1888	182	283	0.00422389			hydroxyisovaleroyl carnitine	leucylglutamate	0.00422389
1889	272	356	0.00422713			gamma-glutamylleucine	nicotinamide	0.00422713
1890	175	192	0.0042274			N-acetylalanine	thymine	0.0042274
1891	49	327	0.00422854			fucose	glutamate, gamma-methyl ester	0.00422854
1892	86	359	0.00422884			2'-deoxyadenosine 3'-monophosphate	ribulose	0.00422884
1893	100	305	0.0042303			5-methylthioadenosine (MTA)	tryptophan	0.0042303
1894	21	354	0.00423586			adenosine 5'diphosphoribose	phenylalanine	0.00423586
1895	42	371	0.00423669			1-linoleoylglycerophosphocholine (18:2n6)	thromboxane B2	0.00423669
1896	191	325	0.00424238			1-stearoylglycerophosphoinositol	xanthine	0.00424238
1897	237	351	0.0042427			glutamate	riboflavin (Vitamin B2)	0.0042427
1898	202	290	0.00424347			lactate	threonine	0.00424347
1899	95	178	0.00424414			glycine	ornithine	0.00424414
1900	98	145	0.00424475			Ac-Ser-Asp-Lys-Pro-OH	gamma-aminobutyrate (GABA)	0.00424475
1901	251	371	0.00424546			adenosine 2'-monophosphate (2'-AMP)	creatine	0.00424546
1902	94	359	0.00424621			lysine	xanthine	0.00424621
1903	102	171	0.00424773			acetylphosphate	tryptophan	0.00424773
1904	139	331	0.00424883			adrenate (22:4n6)	ethanolamine	0.00424883
1905	139	299	0.00424922			cholesterol	sedoheptulose-7-phosphate	0.00424922
1906	243	245	0.00425127			cholesterol	pelargonate (9:0)	0.00425127
1907	214	321	0.00426314			leucylglycine	leucylserine	0.00426314
1908	290	360	0.00426831			histidine	pseudouridine	0.00426831
1909	257	373	0.0042703			ornithine	tyrosine	0.0042703
1910	78	89	0.00427207			mannose-6-phosphate	xylitol	0.00427207
1911	125	139	0.00427493			3-phosphoglycerate	6-keto prostaglandin F1alpha	0.00427493
1912	17	25	0.00428614			beta-alanine	cholesterol	0.00428614
1913	136	329	0.00428696			1-eicosenoylglycerophosphocholine (20:1n9)*	1-myristoylglycerophosphocholine (14:0)	0.00428696
1914	225	230	0.00428863			C-glycosyltryptophan*	sarcosine (N-Methylglycine)	0.00428863
1915	237	256	0.00429206			inositol 1-phosphate (I1P)	isoleucine	0.00429206
1916	237	335	0.00429518			lactate	mannose	0.00429518
1917	205	373	0.00429831			lactate	sorbitol	0.00429831
1918	359	373	0.00430203			glycylproline	xylitol	0.00430203
1919	239	321	0.0043024			tryptophan	xylitol	0.0043024
1920	34	324	0.00430966			laurate (12:0)	pseudouridine	0.00430966
1921	97	361	0.00431299			1-palmitoylglycerol (1-monopalmitin)	ribitol	0.00431299
1922	120	336	0.00431496			adenosine	tyrosylglycine	0.00431496
1923	255	290	0.00431562			asparagylleucine	spermidine	0.00431562
1924	237	326	0.00432073			mannitol	ornithine	0.00432073
1925	74	226	0.00432783			lactate	ribose	0.00432783
1926	171	275	0.00432806			3-dehydrocarnitine*	Isobar: betaine aldehyde, N-methyldiethanolamine	0.00432806
1927	276	290	0.00433081			ethanolamine	N-acetylglucosamine 6-phosphate	0.00433081
1928	201	332	0.00433295			N-acetylmethionine	ornithine	0.00433295
1929	139	324	0.00433475			glycerophosphorylcholine (GPC)	serine	0.00433475
1930	106	353	0.004336			cholesterol	ribitol	0.004336
1931	240	316	0.00433604			alanylleucine	threonylphenylalanine	0.00433604
1932	244	309	0.00433772			leucine	proline	0.00433772
1933	138	305	0.00433852			leucylmethionine	phenylalanylserine	0.00433852
1934	181	183	0.0043387			cholestanol	phenylalanine	0.0043387
1935	48	170	0.00434012			gamma-glutamylisoleucine*	gamma-glutamylmethionine	0.00434012
1936	60	190	0.00434117			2-arachidonoylglycerophosphoethanolamine*	erythronate*	0.00434117
1937	90	223	0.00434788			2-hydroxystearate	glucose-6-phosphate (G6P)	0.00434788
1938	48	279	0.00434907			7-alpha-hydroxycholesterol	inosine	0.00434907
1939	125	368	0.00435104			2-arachidonoylglycerophosphoethanolamine*	N-acetylthreonine	0.00435104
1940	13	71	0.00435988			beta-alanine	valine	0.00435988
1941	74	322	0.00436234			1-docosahexaenoylglycerophosphocholine (22:6n3)*	2-palmitoylglycerophosphoethanolamine*	0.00436234
1942	282	304	0.00436382			3-dehydrocarnitine*	putrescine	0.00436382
1943	48	237	0.00436451			N-glycolylneuraminate	phenylacetylglycine	0.00436451
1944	97	120	0.00436726			2-arachidonoylglycerophosphoethanolamine*	lactate	0.00436726
1945	355	361	0.00436798			adenosine	asparagylleucine	0.00436798
1946	321	357	0.0043714			thymidine	tyrosylglycine	0.0043714
1947	68	163	0.00437348			pseudouridine	trans-4-hydroxyproline	0.00437348
1948	89	343	0.00437507			2-oleoylglycerophosphoserine*	docosapentaenoate (n6 DPA; 22:5n6)	0.00437507
1949	125	350	0.00437827			6-keto prostaglandin F1alpha	stearoyl sphingomyelin	0.00437827
1950	158	165	0.00438797			beta-alanine	threonate	0.00438797
1951	358	373	0.00440807			dihomo-linolenate (20:3n3 or n6)	eicosenoate (20:1n9 or 11)	0.00440807
1952	175	321	0.00441205			trans-urocanate	xylitol	0.00441205
1953	274	283	0.00441824			fucose	pseudouridine	0.00441824
1954	230	271	0.00442519			N-acetyl-aspartyl-glutamate (NAAG)	nicotinamide	0.00442519
1955	59	76	0.00442552			isoleucine	N6-acetyllysine	0.00442552
1956	48	121	0.00442621			2-hydroxypalmitate	3-hydroxybutyrate (BHBA)	0.00442621
1957	240	358	0.0044265			2-arachidonoylglycerophosphoethanolamine*	aspartate	0.0044265
1958	77	314	0.00442821			leucine	trans-urocanate	0.00442821
1959	243	246	0.00442946			3-indoxyl sulfate	pipecolate	0.00442946
1960	100	173	0.00443209			leucylglycine	leucylthreonine	0.00443209
1961	109	353	0.00443307			adenosine 5'diphosphoribose	fructose	0.00443307
1962	98	160	0.00443581			alpha-glutamyltyrosine	threonylphenylalanine	0.00443581
1963	96	279	0.00443696			adenosine 2'-monophosphate (2'-AMP)	dimethylarginine (SDMA + ADMA)	0.00443696
1964	118	247	0.00443907			adenine	N-acetylthreonine	0.00443907
1965	134	316	0.00443932			ascorbate (Vitamin C)	leu-leu-leu	0.00443932
1966	190	311	0.00444049			carnosine	proline	0.00444049
1967	11	176	0.00444815			glucose-6-phosphate (G6P)	phosphate	0.00444815
1968	121	305	0.00445096			1-arachidonoylglycerophosphoinositol*	fumarate	0.00445096
1969	134	170	0.00445154			aspartate	phenylalanine	0.00445154
1970	257	329	0.00445402			carnosine	erythronate*	0.00445402
1971	192	279	0.00445701			mannose-6-phosphate	sarcosine (N-Methylglycine)	0.00445701
1972	86	230	0.00445702			glutamate, gamma-methyl ester	N-acetylthreonine	0.00445702
1973	138	202	0.00445725			5-methylthioadenosine (MTA)	isoleucine	0.00445725
1974	26	225	0.00446278			cholestanol	glycine	0.00446278
1975	191	316	0.00446436			1-oleoylglycerol (1-monoolein)	inositol 1-phosphate (I1P)	0.00446436
1976	160	174	0.00447231			glutamate	proline	0.00447231
1977	111	199	0.00447451			dimethylarginine (SDMA + ADMA)	fructose-6-phosphate	0.00447451
1978	76	329	0.00447678			alpha-tocopherol	glycerol 2-phosphate	0.00447678
1979	165	172	0.00448407			3-hydroxybutyrate (BHBA)	sarcosine (N-Methylglycine)	0.00448407
1980	68	152	0.00448685			eicosenoate (20:1n9 or 11)	flavin adenine dinucleotide (FAD)	0.00448685
1981	96	230	0.00448723			2-oleoylglycerophosphoserine*	cytidine 5'-monophosphate (5'-CMP)	0.00448723
1982	234	245	0.00449038			adenine	isoleucine	0.00449038
1983	39	191	0.00449254			isoleucylthreonine	leucylserine	0.00449254
1984	272	279	0.00449337			1-stearoylglycerol (1-monostearin)	glutamate	0.00449337
1985	191	373	0.004503			N-acetylalanine	N-acetylthreonine	0.004503
1986	96	104	0.00450754			glutamate	xylitol	0.00450754
1987	176	373	0.00451055			adenine	alanine	0.00451055
1988	111	180	0.00451148			fumarate	xylitol	0.00451148
1989	257	321	0.00452942			alpha-tocopherol	gamma-glutamylglutamate	0.00452942
1990	234	340	0.00453049			mannose-6-phosphate	pseudouridine	0.00453049
1991	163	259	0.00453276			isoleucylthreonine	stachydrine	0.00453276
1992	11	283	0.00453345			docosapentaenoate (n6 DPA; 22:5n6)	mead acid (20:3n9)	0.00453345
1993	329	371	0.0045428			1-arachidonoylglycerophosphoinositol*	nicotinamide	0.0045428
1994	39	199	0.0045451			sarcosine (N-Methylglycine)	xanthine	0.0045451
1995	305	358	0.00454755			1-stearoylglycerol (1-monostearin)	glycerol 2-phosphate	0.00454755
1996	186	372	0.0045481			phenylalanine	trans-urocanate	0.0045481
1997	170	357	0.00454873			gamma-glutamyltryptophan	xanthosine	0.00454873
1998	178	186	0.00455351			erythronate*	trans-4-hydroxyproline	0.00455351
1999	173	279	0.00455518			gamma-aminobutyrate (GABA)	gamma-glutamyltryptophan	0.00455518
[truncated: 2,787 more rows]

## Sheet: Gene-Gene Raw Data
gname1	gname2	pval	beta	corr
1421766_at	1449145_a_at	4.00311e-09	-0.214219	-0.999998
1416757_at	1417541_at	3.73011e-08	0.724542	0.99999
1436991_x_at	1437171_x_at	1.05684e-07	0.971799	0.99998
1436991_x_at	1456312_x_at	1.11106e-07	1.01063	0.99998
1437171_x_at	1456312_x_at	1.90691e-07	1.03992	0.999971
1438850_at	1438851_x_at	2.29335e-07	0.986634	0.999967
1437582_at	1437583_x_at	2.47191e-07	0.976473	0.999965
1438694_at	1455579_at	3.51711e-07	1.01839	0.999956
1419463_at	1460259_s_at	3.81654e-07	1.01618	0.999953
1420633_a_at	1436170_a_at	3.85389e-07	0.981483	0.999953
1420549_at	1436563_at	4.34046e-07	1.88346	0.999949
1425754_a_at	1451824_at	4.35588e-07	1.03475	0.999949
1422552_at	1449244_at	5.82904e-07	-0.791189	-0.999938
1423714_at	1434079_s_at	8.21267e-07	0.840353	0.999922
1456568_at	1456569_x_at	8.23744e-07	1.02005	0.999922
1417347_at	1436737_a_at	8.39915e-07	-0.865778	-0.999921
1437805_at	1437806_x_at	9.06202e-07	0.982768	0.999917
1416803_at	1429457_at	1.28602e-06	-1.17551	-0.999895
1424985_a_at	1451689_a_at	1.31061e-06	0.961477	0.999894
1460714_at	1460715_x_at	1.34802e-06	0.992456	0.999892
1417129_a_at	1456437_x_at	1.49394e-06	0.890864	0.999884
1426268_at	1452716_at	1.60171e-06	-1.39008	-0.999879
1417429_at	1421404_at	1.62109e-06	0.672452	0.999878
1424401_at	1449104_at	1.70753e-06	0.825724	0.999874
1425272_at	1425273_s_at	1.83649e-06	1.04585	0.999867
1448899_s_at	1450692_at	1.8504e-06	0.786806	0.999867
1420185_at	1449764_x_at	1.88983e-06	1.00605	0.999865
1452314_at	1452315_at	2.07833e-06	1.10186	0.999856
1423026_at	1425279_at	2.38737e-06	0.904844	0.999842
1417910_at	1424128_x_at	2.40001e-06	1.0075	0.999841
1419603_at	1420243_at	2.45602e-06	1.57242	0.999839
1419474_a_at	1451375_at	2.47309e-06	0.9956	0.999838
1419343_at	1426570_a_at	2.50938e-06	0.725907	0.999837
1418190_at	1427355_at	2.68054e-06	1.24542	0.999829
1416527_at	1451375_at	3.03168e-06	-0.561599	-0.999815
1431675_a_at	1431676_x_at	3.19559e-06	0.986362	0.999808
1416225_at	1438914_at	3.35502e-06	1.11087	0.999802
1416416_x_at	1448330_at	3.418e-06	0.969776	0.999799
1419550_a_at	1419551_s_at	3.44308e-06	0.951918	0.999798
1416564_at	1423878_at	3.53073e-06	1.2291	0.999795
1417394_at	1426301_at	3.61311e-06	1.56512	0.999792
1418766_s_at	1425581_s_at	3.68576e-06	1.48171	0.999789
1416778_at	1416779_at	3.79535e-06	0.982952	0.999785
1419075_s_at	1449326_x_at	3.80558e-06	0.996832	0.999784
1417680_at	1448919_at	3.9102e-06	0.448796	0.99978
1424158_at	1454959_s_at	3.9559e-06	1.04655	0.999779
1420981_a_at	1423250_a_at	4.06965e-06	1.48262	0.999774
1436879_x_at	1436881_x_at	4.15771e-06	0.986346	0.999771
1419551_s_at	1436244_a_at	4.15873e-06	1.12393	0.999771
1420992_at	1425906_a_at	4.29649e-06	1.60098	0.999766
1421733_a_at	1427477_at	4.31776e-06	-0.787742	-0.999765
1417394_at	1417395_at	4.36025e-06	0.995315	0.999764
1433685_a_at	1454686_at	4.49462e-06	1.02657	0.999759
1420369_a_at	1426231_at	4.65739e-06	-4.71025	-0.999753
1425249_a_at	1428333_at	4.67632e-06	-0.47336	-0.999752
1423166_at	1450883_a_at	4.69417e-06	0.998719	0.999752
1420633_a_at	1438694_at	4.78973e-06	0.971544	0.999748
1426243_at	1455796_x_at	4.92095e-06	0.88284	0.999744
1417073_a_at	1418304_at	5.00839e-06	-0.504955	-0.999741
1419662_at	1419663_at	5.04327e-06	1.03396	0.99974
1416416_x_at	1425627_x_at	5.08143e-06	1.03987	0.999738
1438082_at	1438953_at	5.23886e-06	1.24641	0.999733
1449081_at	1451966_at	5.27575e-06	1.64248	0.999732
1434437_x_at	1448226_at	5.2825e-06	1.01292	0.999731
1418195_at	1426243_at	5.2888e-06	-1.47881	-0.999731
1421546_a_at	1423809_at	5.51504e-06	1.07696	0.999724
1428104_at	1428105_at	5.74833e-06	0.990727	0.999716
1417346_at	1423084_at	5.75943e-06	-2.41937	-0.999716
1427355_at	1452004_at	5.76337e-06	0.990436	0.999715
1419064_a_at	1427529_at	5.79551e-06	0.675186	0.999714
1419643_s_at	1425961_at	5.88586e-06	3.07493	0.999711
1422141_s_at	1460416_s_at	6.00892e-06	1.03467	0.999707
1427104_at	1431434_at	6.08736e-06	0.626231	0.999705
1424647_at	1451424_at	6.33989e-06	0.992753	0.999697
1416253_at	1435532_at	6.40364e-06	2.32461	0.999695
1422944_a_at	1452315_at	6.46524e-06	1.23312	0.999693
1417942_at	1419152_at	6.75646e-06	0.873732	0.999684
1417395_at	1426301_at	6.77514e-06	1.57194	0.999683
1428538_s_at	1437902_s_at	6.83046e-06	0.989495	0.999681
1448254_at	1451320_at	6.9204e-06	-0.915684	-0.999678
1416992_at	1423489_at	6.92901e-06	0.642976	0.999678
1416854_at	1449458_at	7.07555e-06	0.551259	0.999674
1426340_at	1426341_at	7.09302e-06	1.15412	0.999673
1416978_at	1421404_at	7.09656e-06	0.716773	0.999673
1426634_at	1452244_at	7.16684e-06	-1.55031	-0.999671
1419550_a_at	1436244_a_at	7.17296e-06	1.07	0.999671
1436170_a_at	1438694_at	7.23632e-06	0.989748	0.999669
1427489_at	1449265_at	7.24472e-06	1.15332	0.999669
1417942_at	1425625_at	7.30445e-06	1.69208	0.999667
1417133_at	1430306_a_at	7.37475e-06	-0.719636	-0.999665
1425627_x_at	1448330_at	7.38557e-06	0.932228	0.999664
1419124_at	1426562_a_at	7.54536e-06	-1.15997	-0.999659
1438912_at	1438913_x_at	7.95248e-06	0.989729	0.999647
1431591_s_at	1453939_x_at	7.9801e-06	1.08309	0.999646
1433892_at	1433893_s_at	8.01814e-06	0.991849	0.999645
1420369_a_at	1420370_s_at	8.30392e-06	1.02294	0.999637
1415945_at	1423092_at	8.36193e-06	1.23132	0.999635
1420633_a_at	1455579_at	8.37977e-06	0.989344	0.999635
1436170_a_at	1455579_at	8.50718e-06	1.00796	0.999631
1416194_at	1424470_a_at	8.53872e-06	1.11425	0.99963
1448229_s_at	1455956_x_at	8.55868e-06	0.957208	0.99963
1423488_at	1427345_a_at	8.72584e-06	1.05041	0.999625
1425837_a_at	1437583_x_at	8.93772e-06	-0.862025	-0.999619
1417938_at	1422513_at	8.96962e-06	1.10938	0.999618
1416301_a_at	1448293_at	9.15709e-06	0.980775	0.999612
1422513_at	1450692_at	9.16707e-06	0.723522	0.999612
1426153_a_at	1449741_at	9.22815e-06	0.996706	0.99961
1421374_a_at	1450974_at	9.3727e-06	1.14599	0.999606
1417023_a_at	1451263_a_at	9.4066e-06	1.02843	0.999605
1438571_at	1460292_a_at	9.4844e-06	-1.5965	-0.999603
1421173_at	1450974_at	9.55574e-06	0.859902	0.999601
1422970_at	1424629_at	9.55781e-06	0.717582	0.999601
1416527_at	1419474_a_at	9.84084e-06	-0.563865	-0.999593
1417644_at	1449458_at	9.8943e-06	-0.602525	-0.999592
1426929_at	1452240_at	1.00347e-05	0.981616	0.999588
1435306_a_at	1452315_at	1.02207e-05	1.10789	0.999583
1417757_at	1423250_a_at	1.02759e-05	1.14798	0.999582
1450928_at	1455298_at	1.02892e-05	0.986854	0.999581
1431734_a_at	1452732_at	1.02893e-05	-0.854586	-0.999581
1421766_at	1439018_at	1.03119e-05	0.345272	0.999581
1448154_at	1449102_at	1.03324e-05	1.03599	0.99958
1418339_at	1425798_a_at	1.048e-05	1.02387	0.999576
1418782_at	1448730_at	1.06194e-05	0.973897	0.999572
1439018_at	1449145_a_at	1.06365e-05	-0.61991	-0.999572
1436872_at	1437716_x_at	1.0693e-05	0.991447	0.99957
1423523_at	1450716_at	1.09035e-05	-2.14551	-0.999565
1417926_at	1434116_at	1.09821e-05	1.53313	0.999563
1416251_at	1451417_at	1.10072e-05	1.1015	0.999562
1425792_a_at	1425793_a_at	1.1402e-05	1.08829	0.999551
1418494_at	1449102_at	1.14624e-05	0.924579	0.99955
1417019_a_at	1419397_at	1.15867e-05	1.0441	0.999547
1417649_at	1448752_at	1.1647e-05	-0.585802	-0.999545
1419571_at	1450774_at	1.21467e-05	2.37902	0.999532
1439018_at	1456676_a_at	1.2291e-05	-0.950701	-0.999528
1417926_at	1422059_at	1.23181e-05	1.54702	0.999528
1416978_at	1417429_at	1.23569e-05	1.06562	0.999527
1419153_at	1422430_at	1.23872e-05	1.14459	0.999526
1425837_a_at	1437582_at	1.24947e-05	-0.88268	-0.999523
1418643_at	1460239_at	1.27179e-05	0.964423	0.999518
1417347_at	1417358_s_at	1.28655e-05	-1.11978	-0.999514
1416007_at	1416008_at	1.29028e-05	0.983672	0.999513
1419378_a_at	1419379_x_at	1.30734e-05	1.04468	0.999509
1425586_a_at	1449896_at	1.31742e-05	1.00868	0.999506
1435306_a_at	1452314_at	1.33065e-05	1.00525	0.999503
1420185_at	1420186_at	1.34184e-05	0.979039	0.9995
1415935_at	1417488_at	1.34678e-05	-1.04353	-0.999499
1418190_at	1452004_at	1.35177e-05	1.23345	0.999498
1423775_s_at	1448145_at	1.36001e-05	0.999021	0.999496
1416558_at	1430998_at	1.36181e-05	-1.44047	-0.999495
1423813_at	1448878_at	1.381e-05	1.11769	0.99949
1422141_s_at	1426231_at	1.3902e-05	-2.28071	-0.999488
1422293_a_at	1448919_at	1.44356e-05	-1.00361	-0.999475
1416251_at	1420028_s_at	1.46596e-05	1.07186	0.99947
1451884_a_at	1460746_at	1.48403e-05	0.871231	0.999465
1425784_a_at	1426235_a_at	1.49488e-05	0.760287	0.999463
1423774_a_at	1423809_at	1.50412e-05	0.813528	0.999461
1416749_at	1438251_x_at	1.51992e-05	1.02174	0.999457
1421424_a_at	1426662_at	1.5313e-05	1.08459	0.999454
1428333_at	1451679_at	1.53177e-05	1.00469	0.999454
1418138_at	1448973_at	1.54487e-05	1.04014	0.999451
1420991_at	1420992_at	1.54538e-05	1.00821	0.999451
1422823_at	1422824_s_at	1.5519e-05	1.00745	0.999449
1422016_a_at	1423714_at	1.55366e-05	0.928128	0.999449
1418673_at	1418911_s_at	1.56013e-05	-0.568338	-0.999447
1419504_at	1423866_at	1.56563e-05	2.20311	0.999446
1423858_a_at	1424186_at	1.58316e-05	0.473	0.999442
1424471_at	1450014_at	1.5918e-05	-0.600226	-0.99944
1427277_at	1437902_s_at	1.59785e-05	0.716633	0.999438
1416306_at	1434745_at	1.613e-05	0.509161	0.999435
1417009_at	1422561_at	1.63261e-05	1.13909	0.99943
1418762_at	1460242_at	1.63276e-05	1.02173	0.99943
1418264_at	1419076_a_at	1.68764e-05	1.18219	0.999417
1430474_a_at	1448654_at	1.7048e-05	1.04554	0.999414
1417587_at	1418051_at	1.7123e-05	1.1803	0.999412
1425559_a_at	1448443_at	1.71381e-05	-1.17612	-0.999411
1420655_at	1436737_a_at	1.71746e-05	0.836866	0.999411
1422741_a_at	1425835_a_at	1.72283e-05	1.00406	0.999409
1426231_at	1460416_s_at	1.72901e-05	-0.453291	-0.999408
1422677_at	1422678_at	1.7391e-05	0.966786	0.999406
1417895_a_at	1433670_at	1.74526e-05	1.05748	0.999404
1416306_at	1437946_x_at	1.75993e-05	0.740673	0.999401
1448842_at	1448925_at	1.76094e-05	1.87367	0.999401
1426134_at	1451940_x_at	1.76635e-05	0.916795	0.999399
1420725_at	1420726_x_at	1.76725e-05	0.987396	0.999399
1418318_at	1449036_at	1.76959e-05	0.993744	0.999399
1422170_at	1423228_at	1.77786e-05	0.522736	0.999397
1416757_at	1423813_at	1.80698e-05	0.858918	0.99939
1426236_a_at	1451407_at	1.80842e-05	-0.741481	-0.99939
1425251_at	1452592_at	1.85082e-05	0.634125	0.99938
1420370_s_at	1426231_at	1.85685e-05	-4.60123	-0.999379
1423412_at	1426063_a_at	1.87332e-05	-1.11845	-0.999375
1417541_at	1423813_at	1.88195e-05	1.18543	0.999374
1425145_at	1452160_at	1.90506e-05	0.509833	0.999368
1431734_a_at	1451177_at	1.91765e-05	0.983351	0.999366
1438953_at	1438954_x_at	1.91829e-05	1.01915	0.999366
1417358_s_at	1423084_at	1.92257e-05	2.0757	0.999365
1418157_at	1424099_at	1.92521e-05	0.599484	0.999364
1417568_at	1424649_a_at	1.93305e-05	0.713097	0.999362
1418726_a_at	1424967_x_at	1.93545e-05	0.990957	0.999362
1420991_at	1425906_a_at	1.93594e-05	1.61435	0.999362
1423877_at	1449207_a_at	1.94362e-05	0.931044	0.99936
1417299_at	1452242_at	1.94579e-05	0.826326	0.999359
1422513_at	1448899_s_at	1.96514e-05	0.919209	0.999355
1417074_at	1448573_a_at	1.97144e-05	1.01727	0.999354
1417411_at	1422748_at	1.97692e-05	0.653063	0.999353
1422567_at	1426063_a_at	2.01768e-05	0.939499	0.999344
1416854_at	1417644_at	2.02342e-05	-0.91424	-0.999343
1425746_at	1426560_a_at	2.03419e-05	0.710202	0.99934
1421381_a_at	1428571_at	2.06648e-05	0.962373	0.999333
1419152_at	1425625_at	2.08276e-05	1.93535	0.99933
1415850_at	1418733_at	2.10835e-05	0.90881	0.999324
1426652_at	1426653_at	2.13597e-05	1.05487	0.999318
1428621_a_at	1451650_at	2.13835e-05	0.876631	0.999318
1427183_at	1451972_at	2.1465e-05	2.06411	0.999316
1417347_at	1420655_at	2.14976e-05	-1.03331	-0.999315
1420369_a_at	1422141_s_at	2.16212e-05	2.06328	0.999313
1426906_at	1452231_x_at	2.16353e-05	0.960345	0.999313
1423911_at	1449592_at	2.17665e-05	1.48666	0.99931
1418304_at	1455431_at	2.18253e-05	1.49372	0.999309
1420722_at	1452231_x_at	2.18738e-05	0.367382	0.999307
1418100_at	1448952_at	2.20053e-05	0.982976	0.999305
1417403_at	1417404_at	2.20066e-05	0.998236	0.999305
1417541_at	1448878_at	2.22642e-05	1.32552	0.999299
1420028_s_at	1451417_at	2.23361e-05	1.02683	0.999298
1423866_at	1449466_at	2.2445e-05	0.403902	0.999295
1418320_at	1421571_a_at	2.2905e-05	-0.911568	-0.999286
1417933_at	1423619_at	2.29456e-05	1.3021	0.999285
1421038_a_at	1435945_a_at	2.30205e-05	1.03277	0.999283
1426914_at	1448529_at	2.31638e-05	-0.897872	-0.999281
1418147_at	1436392_s_at	2.32097e-05	1.01085	0.99928
1436565_at	1450684_at	2.33689e-05	0.808303	0.999276
1419465_at	1419466_at	2.33777e-05	1.06004	0.999276
1436392_s_at	1448977_at	2.35425e-05	0.948071	0.999273
1418494_at	1448154_at	2.35854e-05	0.891836	0.999272
1417346_at	1437644_at	2.37039e-05	-2.7656	-0.999269
1437171_x_at	1449147_at	2.37246e-05	1.26445	0.999269
1436991_x_at	1449147_at	2.37985e-05	1.22882	0.999267
1416251_at	1426652_at	2.3917e-05	1.07163	0.999265
1418369_at	1422016_a_at	2.39227e-05	1.07487	0.999265
1420029_at	1426653_at	2.40481e-05	1.02814	0.999262
1417618_at	1449528_at	2.40929e-05	0.808414	0.999261
1418320_at	1426634_at	2.44541e-05	0.711016	0.999254
1419475_a_at	1451375_at	2.50041e-05	0.95017	0.999243
1416239_at	1417645_at	2.50699e-05	-1.03864	-0.999242
1434116_at	1437803_at	2.51186e-05	1.68944	0.999241
1417394_at	1450716_at	2.51379e-05	1.81986	0.99924
1417788_at	1419674_a_at	2.51709e-05	2.1106	0.99924
1416639_at	1421564_at	2.52385e-05	0.777441	0.999238
1418400_at	1423933_a_at	2.53377e-05	-0.380924	-0.999236
1416978_at	1417178_at	2.54029e-05	0.952064	0.999235
1418496_at	1449416_at	2.54075e-05	1.59869	0.999235
1418919_at	1451358_a_at	2.54127e-05	0.875882	0.999235
1423674_at	1423675_at	2.5448e-05	1.00598	0.999234
1424985_a_at	1425369_a_at	2.54551e-05	0.982683	0.999234
1419269_at	1448982_at	2.55631e-05	0.600881	0.999232
1449031_at	1449249_at	2.56066e-05	2.01124	0.999231
1426652_at	1451417_at	2.59364e-05	1.02676	0.999224
1438843_x_at	1448654_at	2.59592e-05	1.01073	0.999224
1417872_at	1451698_at	2.59677e-05	-0.758342	-0.999224
1418369_at	1449207_a_at	2.60605e-05	0.844556	0.999222
1423489_at	1448949_at	2.6307e-05	1.10826	0.999217
1417926_at	1430811_a_at	2.63663e-05	1.17887	0.999216
1436565_at	1448573_a_at	2.65053e-05	0.960894	0.999213
1417644_at	1420011_s_at	2.68401e-05	-0.885915	-0.999206
1421613_at	1450307_x_at	2.68882e-05	1.0268	0.999205
1430127_a_at	1434745_at	2.70174e-05	0.997909	0.999203
1455956_x_at	1459889_at	2.70776e-05	1.9155	0.999202
1427277_at	1428538_s_at	2.714e-05	0.723838	0.9992
1428357_at	1436872_at	2.731e-05	-0.847463	-0.999197
1422607_at	1450684_at	2.73527e-05	0.977763	0.999196
1419485_at	1419486_at	2.7358e-05	1.044	0.999196
1422944_a_at	1452314_at	2.74527e-05	1.11841	0.999194
1416757_at	1448878_at	2.74776e-05	0.960303	0.999194
1448547_at	1460372_at	2.74798e-05	0.71659	0.999194
1417244_a_at	1424470_a_at	2.74973e-05	-1.11785	-0.999193
1420186_at	1449764_x_at	2.75293e-05	1.02638	0.999193
1426225_at	1449038_at	2.76743e-05	1.68011	0.99919
1417686_at	1419662_at	2.82071e-05	0.718602	0.99918
1426569_a_at	1448001_x_at	2.84457e-05	1.08508	0.999175
1430811_a_at	1434116_at	2.85257e-05	1.29898	0.999173
1419555_at	1419556_at	2.85337e-05	0.995926	0.999173
1425917_at	1431824_at	2.85554e-05	0.975169	0.999173
1448469_at	1452040_a_at	2.86746e-05	-1.73626	-0.999171
1417358_s_at	1436737_a_at	2.92192e-05	0.772204	0.99916
1450922_a_at	1450923_at	2.94146e-05	1.00284	0.999156
1415994_at	1419663_at	2.94453e-05	1.02418	0.999156
1425000_s_at	1452412_at	2.95955e-05	-1.14013	-0.999153
1426662_at	1451407_at	2.97308e-05	0.810741	0.99915
1416072_at	1422587_at	2.97754e-05	1.51586	0.999149
1436021_at	1455531_at	2.99429e-05	1.03938	0.999146
1417244_a_at	1437012_x_at	2.99534e-05	-1.06368	-0.999146
1417686_at	1432517_a_at	3.00347e-05	0.871514	0.999144
1423933_a_at	1436021_at	3.01808e-05	0.983057	0.999142
1423619_at	1425416_s_at	3.0196e-05	-0.693304	-0.999141
1418569_at	1449141_at	3.02702e-05	1.01619	0.99914
1449396_at	1449416_at	3.05097e-05	2.3251	0.999135
1437175_at	1451646_at	3.09707e-05	1.04694	0.999127
1418094_s_at	1448995_at	3.13315e-05	1.58028	0.99912
1418773_at	1424509_at	3.14526e-05	-0.804525	-0.999118
1424155_at	1425809_at	3.15134e-05	1.0574	0.999117
1419474_a_at	1419475_a_at	3.16696e-05	1.04626	0.999114
1438441_at	1455298_at	3.17709e-05	0.973682	0.999112
1417884_at	1420981_a_at	3.22885e-05	0.602673	0.999102
1430127_a_at	1437946_x_at	3.23077e-05	1.45155	0.999102
1417023_a_at	1424155_at	3.24423e-05	1.07082	0.999099
1438571_at	1452412_at	3.25537e-05	-1.16898	-0.999097
1449147_at	1456312_x_at	3.26376e-05	0.821111	0.999096
1420664_s_at	1420712_a_at	3.27862e-05	-1.4051	-0.999093
1425250_a_at	1453815_at	3.28801e-05	0.703419	0.999091
1437716_x_at	1448878_at	3.30895e-05	1.22795	0.999087
1416123_at	1416124_at	3.31223e-05	0.982379	0.999087
1421546_a_at	1449207_a_at	3.33646e-05	1.08174	0.999082
1420722_at	1426906_at	3.34818e-05	0.382202	0.99908
1426236_a_at	1426662_at	3.35567e-05	-0.91351	-0.999079
1426301_at	1426551_at	3.36062e-05	-0.824144	-0.999078
1424118_a_at	1448627_s_at	3.36753e-05	0.5795	0.999077
1416301_a_at	1416302_at	3.39759e-05	1.02876	0.999071
1415812_at	1437171_x_at	3.41152e-05	0.950405	0.999069
1418195_at	1455796_x_at	3.41533e-05	-1.30502	-0.999068
1421058_at	1452244_at	3.42376e-05	0.417542	0.999066
1416778_at	1423327_at	3.4338e-05	2.69807	0.999065
1416122_at	1430127_a_at	3.43794e-05	0.976325	0.999064
1416122_at	1434745_at	3.4455e-05	0.97506	0.999062
1426662_at	1428788_at	3.45288e-05	1.12423	0.999061
1416306_at	1417092_at	3.46716e-05	0.851859	0.999059
1418094_s_at	1448949_at	3.47052e-05	1.00928	0.999058
1417347_at	1423797_at	3.50006e-05	-1.22302	-0.999053
1416120_at	1434437_x_at	3.51731e-05	0.927152	0.999049
1418194_at	1421424_a_at	3.52839e-05	0.693912	0.999047
1424838_at	1428983_at	3.55493e-05	1.62685	0.999043
1418369_at	1423809_at	3.5589e-05	0.840135	0.999042
1429294_at	1429295_s_at	3.5641e-05	0.921973	0.999041
1418804_at	1423911_at	3.57332e-05	0.851401	0.999039
1448001_x_at	1454633_at	3.58257e-05	0.609193	0.999038
1419175_a_at	1451824_at	3.59069e-05	0.974005	0.999036
1415802_at	1417589_at	3.59246e-05	-0.843891	-0.999036
1422016_a_at	1434079_s_at	3.65572e-05	0.779685	0.999025
1419693_at	1433892_at	3.66435e-05	-0.541288	-0.999023
1421424_a_at	1428788_at	3.66477e-05	1.21995	0.999023
1423797_at	1436737_a_at	3.66491e-05	0.706595	0.999023
1417938_at	1450692_at	3.68841e-05	0.802488	0.999019
1416076_at	1448205_at	3.69701e-05	0.994884	0.999017
1432190_at	1452511_at	3.70787e-05	1.00526	0.999015
1428788_at	1451407_at	3.7398e-05	0.720373	0.99901
1420029_at	1449705_x_at	3.73995e-05	0.982016	0.99901
1423250_a_at	1424556_at	3.74893e-05	0.772281	0.999008
1427038_at	1438850_at	3.77015e-05	-0.55515	-0.999004
1425109_at	1426937_at	3.77096e-05	-1.27458	-0.999004
1420028_s_at	1426652_at	3.77412e-05	0.998996	0.999004
1421546_a_at	1423877_at	3.77502e-05	1.16102	0.999004
1417872_at	1417933_at	3.77771e-05	0.869409	0.999003
1426340_at	1452031_at	3.77823e-05	1.08939	0.999003
1418926_at	1449036_at	3.78529e-05	-0.621846	-0.999002
1426869_at	1452161_at	3.8066e-05	-0.872754	-0.998998
1422973_a_at	1424737_at	3.81753e-05	1.00824	0.998996
1419175_a_at	1425754_a_at	3.86542e-05	0.9412	0.998988
1421546_a_at	1448145_at	3.86784e-05	1.28103	0.998987
1418339_at	1419717_at	3.87103e-05	1.83103	0.998987
1417757_at	1420981_a_at	3.88123e-05	0.773658	0.998985
1438082_at	1438954_x_at	3.9008e-05	1.27014	0.998982
1418706_at	1424114_s_at	3.90262e-05	-0.907654	-0.998981
1436872_at	1448878_at	3.90756e-05	1.21784	0.99898
1424524_at	1426911_at	3.93046e-05	-1.15823	-0.998976
1422258_at	1450546_at	3.93437e-05	1.60433	0.998976
1423813_at	1451128_s_at	3.96158e-05	0.962807	0.998971
1427161_at	1432538_a_at	3.97489e-05	1.13851	0.998969
1426218_at	1452031_at	3.99946e-05	0.697025	0.998964
1423084_at	1437644_at	4.00735e-05	1.14243	0.998963
1422562_at	1427545_at	4.01047e-05	-0.648932	-0.998963
1423797_at	1451527_at	4.01587e-05	0.663264	0.998962
1423488_at	1423489_at	4.02939e-05	1.01917	0.998959
1416123_at	1453939_x_at	4.04102e-05	-1.02184	-0.998957
1426569_a_at	1454633_at	4.06055e-05	0.661516	0.998954
1419124_at	1424464_s_at	4.06383e-05	1.03912	0.998953
1419717_at	1432829_at	4.09411e-05	-0.506033	-0.998948
1417178_at	1426708_at	4.09569e-05	0.969364	0.998948
1423228_at	1435758_at	4.1099e-05	1.03712	0.998946
1452334_at	1460184_at	4.13422e-05	-0.882935	-0.998941
1426653_at	1451417_at	4.14275e-05	0.972418	0.99894
1418919_at	1422462_at	4.15091e-05	0.941482	0.998939
1418979_at	1426708_at	4.16563e-05	1.1473	0.998936
1421571_a_at	1426634_at	4.16667e-05	-0.779187	-0.998936
1420028_s_at	1426653_at	4.24981e-05	1.05444	0.998922
1426063_a_at	1435176_a_at	4.29873e-05	-0.646642	-0.998913
1420437_at	1424041_s_at	4.30416e-05	0.869379	0.998913
1416306_at	1430127_a_at	4.30801e-05	0.509555	0.998912
1455972_x_at	1460184_at	4.31394e-05	1.01084	0.998911
1424477_at	1448852_at	4.32626e-05	2.01638	0.998909
1416432_at	1417323_at	4.32842e-05	-0.957643	-0.998908
1418194_at	1426243_at	4.33448e-05	-1.45959	-0.998907
1417589_at	1427749_at	4.34315e-05	0.971813	0.998906
1418369_at	1421546_a_at	4.3544e-05	0.779775	0.998904
1417019_a_at	1422462_at	4.3727e-05	0.950358	0.998901
1425369_a_at	1451689_a_at	4.37774e-05	0.976699	0.9989
1421093_at	1438953_at	4.38222e-05	1.49166	0.998899
1451246_s_at	1455834_x_at	4.39676e-05	1.03386	0.998897
1415812_at	1436991_x_at	4.39954e-05	0.977797	0.998897
1452348_s_at	1452349_x_at	4.40199e-05	0.968256	0.998896
1416933_at	1451375_at	4.41055e-05	-0.566468	-0.998895
1421173_at	1432517_a_at	4.43832e-05	0.567962	0.99889
1448839_at	1456629_at	4.45597e-05	0.995609	0.998887
1452412_at	1460292_a_at	4.46851e-05	1.3635	0.998885
1424677_at	1448696_at	4.48357e-05	0.587505	0.998883
1423674_at	1448952_at	4.48614e-05	1.15654	0.998882
1418911_s_at	1451828_a_at	4.49021e-05	0.971574	0.998881
1418648_at	1420998_at	4.50865e-05	1.57371	0.998878
1423935_x_at	1460347_at	4.52599e-05	0.958934	0.998875
1427082_at	1431805_a_at	4.55077e-05	0.80657	0.998871
1416318_at	1417872_at	4.57125e-05	0.586688	0.998868
1435370_a_at	1451966_at	4.57836e-05	1.61801	0.998867
1430371_x_at	1453505_a_at	4.59928e-05	0.98004	0.998863
1422760_at	1450827_at	4.60955e-05	1.19709	0.998862
1421133_at	1448673_at	4.61052e-05	1.19872	0.998862
1417569_at	1420764_at	4.63933e-05	0.836337	0.998857
1424158_at	1434440_at	4.66536e-05	1.12547	0.998853
1417445_at	1450993_at	4.67661e-05	1.1843	0.998851
1417618_at	1421093_at	4.69266e-05	0.498759	0.998848
1416630_at	1418320_at	4.69944e-05	-1.06459	-0.998847
1418194_at	1418195_at	4.70833e-05	0.986681	0.998845
1427038_at	1438851_x_at	4.7327e-05	-0.547659	-0.998841
1423851_a_at	1423852_at	4.74089e-05	0.998025	0.99884
1449158_at	1449396_at	4.74596e-05	0.524457	0.998839
1416527_at	1416933_at	4.76695e-05	0.989339	0.998836
1449490_at	1451775_s_at	4.77204e-05	1.33541	0.998835
1418983_at	1423506_a_at	4.77377e-05	-0.847208	-0.998835
1419152_at	1422462_at	4.77872e-05	1.09979	0.998834
1421093_at	1438082_at	4.7964e-05	1.19636	0.998831
1422944_a_at	1435306_a_at	4.80268e-05	1.11161	0.99883
1418494_at	1449101_at	4.8177e-05	0.901253	0.998828
1438511_a_at	1451512_s_at	4.82024e-05	1.1247	0.998827
1415812_at	1456312_x_at	4.82503e-05	0.988139	0.998826
1427038_at	1437932_a_at	4.83678e-05	-0.530972	-0.998825
1419088_at	1419268_at	4.86751e-05	-2.00727	-0.99882
1449145_a_at	1456676_a_at	4.90539e-05	1.53186	0.998813
1419153_at	1425625_at	4.91799e-05	2.0229	0.998811
1417884_at	1423250_a_at	4.93744e-05	0.893474	0.998808
1420369_a_at	1460416_s_at	5.00865e-05	2.13433	0.998797
1416239_at	1420886_a_at	5.02113e-05	0.76707	0.998795
1416118_at	1419270_a_at	5.05633e-05	1.55329	0.998789
1418369_at	1423877_at	5.06679e-05	0.906132	0.998788
1417235_at	1417236_at	5.10078e-05	0.98974	0.998782
1416123_at	1431591_s_at	5.14948e-05	-0.942947	-0.998774
1420654_a_at	1424357_at	5.15547e-05	0.769438	0.998773
1421766_at	1456676_a_at	5.16164e-05	-0.32814	-0.998772
1425109_at	1436244_a_at	5.17762e-05	0.917351	0.99877
1421227_at	1450171_x_at	5.17964e-05	0.971889	0.99877
1419152_at	1419153_at	5.17974e-05	0.955049	0.99877
1416992_at	1448949_at	5.1941e-05	0.712493	0.998767
1416025_at	1432179_x_at	5.21784e-05	-1.40831	-0.998764
1448878_at	1451128_s_at	5.22478e-05	0.860808	0.998763
1451689_a_at	1456569_x_at	5.24177e-05	-1.17283	-0.99876
1417574_at	1423911_at	5.25757e-05	0.783586	0.998757
1448529_at	1453317_a_at	5.25818e-05	-1.04093	-0.998757
1425249_a_at	1451679_at	5.25997e-05	-0.475368	-0.998757
1423228_at	1460329_at	5.27737e-05	1.04449	0.998754
1423280_at	1449581_at	5.28307e-05	-0.276885	-0.998753
1449101_at	1449102_at	5.29566e-05	1.02386	0.998751
1418848_at	1448995_at	5.33332e-05	1.18675	0.998745
1423166_at	1450884_at	5.35383e-05	1.09687	0.998742
1428026_at	1454613_at	5.38659e-05	1.03264	0.998737
1434748_at	1452334_at	5.39893e-05	0.973556	0.998735
1426301_at	1426550_at	5.40686e-05	-0.831674	-0.998734
1417236_at	1428571_at	5.40728e-05	0.548303	0.998734
1423774_a_at	1448145_at	5.4204e-05	0.967683	0.998732
1418164_at	1420244_at	5.4468e-05	1.2088	0.998728
1416527_at	1419475_a_at	5.4512e-05	-0.58996	-0.998727
1420437_at	1435833_at	5.45578e-05	1.4389	0.998726
1419089_at	1449334_at	5.47258e-05	1.01478	0.998724
1425597_a_at	1425961_at	5.48191e-05	-0.795139	-0.998722
1425606_at	1449319_at	5.4954e-05	-1.70746	-0.99872
1417757_at	1424556_at	5.49701e-05	0.886681	0.99872
1425842_at	1437852_x_at	5.49752e-05	-0.639126	-0.99872
1427082_at	1455802_x_at	5.5018e-05	2.11112	0.998719
1418199_at	1426561_a_at	5.50786e-05	0.276006	0.998718
1421546_a_at	1432538_a_at	5.52855e-05	1.22816	0.998715
1425260_at	1438571_at	5.54028e-05	-0.925696	-0.998713
1421156_a_at	1449154_at	5.55306e-05	0.406516	0.998711
1419144_at	1426218_at	5.56546e-05	1.52983	0.998709
1418648_at	1426560_a_at	5.56914e-05	1.27294	0.998709
1423260_at	1450928_at	5.57334e-05	0.998692	0.998708
1418397_at	1449334_at	5.58593e-05	1.10741	0.998706
1418400_at	1436021_at	5.58722e-05	-0.374593	-0.998706
1420011_s_at	1449458_at	5.59878e-05	0.678972	0.998704
1416211_a_at	1448254_at	5.60321e-05	1.0232	0.998703
1424677_at	1425000_s_at	5.61844e-05	-1.07653	-0.998701
1424292_at	1448074_at	5.63201e-05	2.28962	0.998699
1417073_a_at	1455431_at	5.63324e-05	-0.753998	-0.998699
1421546_a_at	1423774_a_at	5.63539e-05	1.32175	0.998698
1426721_s_at	1452160_at	5.63779e-05	0.964415	0.998698
1419556_at	1420054_s_at	5.6452e-05	2.10839	0.998697
1421173_at	1421374_a_at	5.67579e-05	0.749378	0.998692
1419073_at	1451371_at	5.67713e-05	0.539897	0.998692
1416978_at	1422293_a_at	5.69984e-05	-0.791305	-0.998689
1419550_a_at	1450673_at	5.72251e-05	0.932036	0.998685
1419570_at	1450774_at	5.72431e-05	2.20702	0.998685
1422823_at	1425290_at	5.72565e-05	-1.35363	-0.998685
1416194_at	1417244_a_at	5.73242e-05	-0.995029	-0.998684
1418164_at	1420243_at	5.77361e-05	1.16633	0.998677
1423809_at	1448145_at	5.78409e-05	1.18878	0.998676
1418400_at	1426978_at	5.79189e-05	0.671891	0.998674
1438850_at	1450014_at	5.81685e-05	0.976348	0.998671
1449145_a_at	1449158_at	5.81691e-05	1.87862	0.998671
1415994_at	1419662_at	5.82905e-05	0.989806	0.998669
1421429_a_at	1449265_at	5.83019e-05	0.886565	0.998669
1416118_at	1428357_at	5.83551e-05	-1.2886	-0.998668
1426570_a_at	1448001_x_at	5.8429e-05	1.17742	0.998667
1421429_a_at	1427489_at	5.84787e-05	0.768453	0.998666
1448949_at	1448995_at	5.84947e-05	1.56357	0.998666
1416629_at	1424524_at	5.85542e-05	1.21805	0.998665
1419884_at	1449650_at	5.85641e-05	1.02845	0.998665
1433531_at	1451828_a_at	5.86009e-05	0.970794	0.998664
1418424_at	1426867_at	5.86396e-05	0.570867	0.998664
1416318_at	1419663_at	5.86406e-05	0.442745	0.998664
1417236_at	1421381_a_at	5.86691e-05	0.56932	0.998663
1417884_at	1450922_a_at	5.88686e-05	0.819702	0.99866
1434319_at	1438842_at	5.89592e-05	1.02889	0.998659
1423093_at	1448654_at	5.90957e-05	-1.02146	-0.998657
1435176_a_at	1453596_at	5.92086e-05	1.05688	0.998655
1426708_at	1449416_at	5.95389e-05	1.26631	0.99865
1417273_at	1426662_at	5.96897e-05	-1.34424	-0.998648
1426225_at	1451698_at	5.99789e-05	-1.49319	-0.998643
1421404_at	1422293_a_at	5.99905e-05	-1.10357	-0.998643
1426301_at	1450716_at	6.0047e-05	1.16183	0.998642
1417863_at	1426914_at	6.01151e-05	0.508352	0.998641
1416803_at	1437012_x_at	6.01343e-05	0.998031	0.998641
1426620_at	1449154_at	6.04998e-05	0.344853	0.998635
1423700_at	1452334_at	6.06368e-05	0.854594	0.998633
1452231_x_at	1452349_x_at	6.06369e-05	1.06968	0.998633
1418363_at	1423305_at	6.07498e-05	2.33019	0.998632
1417588_at	1427403_at	6.0942e-05	1.72291	0.998629
1423700_at	1427161_at	6.10571e-05	0.85169	0.998627
1417851_at	1420722_at	6.11378e-05	1.17997	0.998626
1419270_a_at	1455972_x_at	6.13638e-05	-0.539845	-0.998622
1421571_a_at	1452244_at	6.14419e-05	1.208	0.998621
1452314_at	1460168_at	6.15703e-05	1.64876	0.998619
1420029_at	1434319_at	6.17439e-05	-1.3129	-0.998617
1418094_s_at	1418848_at	6.17774e-05	1.32926	0.998616
1426652_at	1434319_at	6.22341e-05	-1.34694	-0.998609
1449249_at	1451679_at	6.22366e-05	0.27947	0.998609
1432538_a_at	1449207_a_at	6.22558e-05	0.879231	0.998609
1419144_at	1452031_at	6.2376e-05	1.06733	0.998607
1428026_at	1438933_x_at	6.24676e-05	1.1978	0.998606
1416630_at	1421571_a_at	6.24987e-05	0.970907	0.998605
1434745_at	1437946_x_at	6.25864e-05	1.45271	0.998604
1417395_at	1426550_at	6.27961e-05	-1.30758	-0.998601
1419089_at	1449335_at	6.29142e-05	0.944691	0.998599
1416779_at	1423327_at	6.31582e-05	2.74299	0.998596
1420886_a_at	1421001_a_at	6.33303e-05	0.401271	0.998593
1421429_a_at	1425746_at	6.33815e-05	1.32189	0.998592
1422140_at	1460416_s_at	6.3438e-05	0.889459	0.998592
1420664_s_at	1448925_at	6.35032e-05	1.51194	0.998591
1420764_at	1451637_a_at	6.35281e-05	1.60122	0.99859
1422567_at	1435176_a_at	6.35753e-05	-0.607721	-0.99859
1417680_at	1422293_a_at	6.37536e-05	-0.446411	-0.998587
1452334_at	1453683_a_at	6.37766e-05	1.03655	0.998587
1418341_at	1449048_s_at	6.39232e-05	1.03491	0.998584
1417863_at	1456676_a_at	6.43205e-05	-0.48354	-0.998579
1417346_at	1427213_at	6.45775e-05	-1.46676	-0.998575
1427278_at	1427279_at	6.45919e-05	1.07465	0.998575
1422000_at	1428079_at	6.46843e-05	0.594749	0.998573
1448229_s_at	1459889_at	6.47941e-05	1.83305	0.998572
1417858_at	1425784_a_at	6.48242e-05	-1.38312	-0.998571
1421766_at	1449158_at	6.49471e-05	-0.402396	-0.998569
1422398_at	1426580_at	6.52726e-05	0.802154	0.998565
1416251_at	1455791_at	6.52816e-05	1.15229	0.998564
1418243_at	1419073_at	6.54351e-05	1.00467	0.998562
1419343_at	1448001_x_at	6.58567e-05	0.854746	0.998556
1427164_at	1454783_at	6.61726e-05	0.923367	0.998551
1417023_a_at	1425809_at	6.66878e-05	1.13266	0.998544
1423700_at	1434748_at	6.715e-05	0.876612	0.998537
1418496_at	1449396_at	6.72166e-05	0.686505	0.998536
1431824_at	1432392_at	6.74912e-05	-0.725908	-0.998532
1418979_at	1422587_at	6.76326e-05	1.8589	0.99853
1424677_at	1452412_at	6.76486e-05	1.22822	0.99853
1417394_at	1423523_at	6.77985e-05	-0.847243	-0.998528
1423775_s_at	1452242_at	6.78756e-05	0.815692	0.998527
1450301_at	1451884_a_at	6.79966e-05	-0.422341	-0.998525
1437750_at	1449948_at	6.81198e-05	-1.1581	-0.998523
1452334_at	1455972_x_at	6.81429e-05	-0.872152	-0.998523
1421133_at	1423331_a_at	6.82379e-05	1.16166	0.998521
1417765_a_at	1449038_at	6.84222e-05	1.41072	0.998519
1419619_at	1435162_at	6.86049e-05	0.585615	0.998516
1418147_at	1448977_at	6.87931e-05	0.958319	0.998513
1427082_at	1450995_at	6.95627e-05	0.451559	0.998502
1418304_at	1419057_at	6.96971e-05	1.5104	0.9985
1422170_at	1435758_at	6.98941e-05	0.542222	0.998498
1448251_at	1449158_at	6.99227e-05	1.2518	0.998497
1426653_at	1434319_at	7.01086e-05	-1.27586	-0.998494
1430474_a_at	1431542_at	7.03493e-05	1.3902	0.998491
1419057_at	1455431_at	7.05003e-05	0.986664	0.998489
1437932_a_at	1437946_x_at	7.06262e-05	-1.73131	-0.998487
1425400_a_at	1438261_at	7.06842e-05	1.19444	0.998486
1418815_at	1431805_a_at	7.11384e-05	-0.542151	-0.99848
1418599_at	1426620_at	7.11617e-05	2.87033	0.998479
1418203_at	1452590_a_at	7.11836e-05	0.8525	0.998479
1419073_at	1460693_a_at	7.12343e-05	-1.10742	-0.998478
1426652_at	1437806_x_at	7.12448e-05	-1.3409	-0.998478
1448777_at	1448982_at	7.12905e-05	0.980681	0.998478
1418239_at	1460239_at	7.13635e-05	0.340201	0.998477
1417358_s_at	1420655_at	7.17768e-05	0.921553	0.998471
1418697_at	1451322_at	7.18981e-05	0.878249	0.998469
1423809_at	1423877_at	7.19721e-05	1.07718	0.998468
1428333_at	1449249_at	7.20726e-05	3.58645	0.998466
1423877_at	1448145_at	7.22765e-05	1.10168	0.998464
1424400_a_at	1448649_at	7.33373e-05	0.717488	0.998449
1418858_at	1425065_at	7.33643e-05	-0.702999	-0.998448
1417347_at	1423084_at	7.35862e-05	-2.32331	-0.998445
1417395_at	1450716_at	7.38494e-05	1.82653	0.998441
1418876_at	1418877_at	7.40261e-05	0.971386	0.998439
1423259_at	1450928_at	7.41768e-05	1.00752	0.998437
1422059_at	1434116_at	7.45809e-05	0.989434	0.998431
1418138_at	1424113_at	7.46378e-05	-0.571121	-0.99843
1416432_at	1456676_a_at	7.49372e-05	1.16393	0.998426
1423933_a_at	1455531_at	7.49826e-05	1.02191	0.998425
1421921_at	1424626_at	7.5085e-05	0.553482	0.998424
1416558_at	1449061_a_at	7.50889e-05	1.15318	0.998424
1427165_at	1451775_s_at	7.51627e-05	1.03315	0.998423
1419057_at	1425290_at	7.52029e-05	1.86252	0.998422
1424985_a_at	1456569_x_at	7.52803e-05	-1.12738	-0.998421
1418983_at	1423619_at	7.52831e-05	-1.06201	-0.998421
1417346_at	1417358_s_at	7.54072e-05	-1.16332	-0.99842
1426155_a_at	1450060_at	7.55347e-05	-0.183568	-0.998418
1418195_at	1419124_at	7.55445e-05	1.04153	0.998418
1448145_at	1452242_at	7.55826e-05	0.81599	0.998417
1449061_a_at	1451246_s_at	7.55916e-05	0.955413	0.998417
1424471_at	1452652_at	7.56039e-05	0.892716	0.998417
1417938_at	1448899_s_at	7.5826e-05	1.01918	0.998414
1452136_at	1452244_at	7.58822e-05	-1.52437	-0.998413
1417459_at	1450716_at	7.60542e-05	-1.25346	-0.99841
1416749_at	1428788_at	7.62356e-05	-1.47024	-0.998408
1422824_s_at	1425290_at	7.64557e-05	-1.3425	-0.998405
1434748_at	1453683_a_at	7.67133e-05	1.01023	0.998401
1424985_a_at	1452031_at	7.68827e-05	-1.33582	-0.998399
1417568_at	1417569_at	7.6897e-05	0.938346	0.998399
1417942_at	1422462_at	7.68973e-05	0.960809	0.998399
1418726_a_at	1419728_at	7.71881e-05	0.720097	0.998395
1416564_at	1453317_a_at	7.75805e-05	-0.669162	-0.998389
1426300_at	1426550_at	7.77242e-05	-0.74306	-0.998387
1416076_at	1425248_a_at	7.78033e-05	1.40256	0.998386
1417178_at	1422293_a_at	7.82351e-05	-0.830255	-0.99838
1449334_at	1450716_at	7.84323e-05	1.0176	0.998378
1417940_s_at	1448899_s_at	7.87382e-05	0.97101	0.998373
1419088_at	1425032_at	7.88138e-05	-0.27411	-0.998372
1426236_a_at	1428788_at	7.88884e-05	-1.02723	-0.998371
1417411_at	1435176_a_at	7.88958e-05	-0.529243	-0.998371
1451177_at	1452732_at	7.91188e-05	-0.86745	-0.998368
1417939_at	1449490_at	7.91224e-05	1.03835	0.998368
1420028_s_at	1420029_at	7.92465e-05	1.02425	0.998366
1421328_at	1424187_at	7.94321e-05	-0.473896	-0.998364
1417552_at	1448469_at	7.9552e-05	0.717762	0.998362
1419407_at	1435833_at	7.96676e-05	0.977175	0.998361
1438851_x_at	1450014_at	7.98929e-05	0.989232	0.998357
1418940_at	1422606_at	7.99928e-05	0.457708	0.998356
1422016_a_at	1449207_a_at	8.00481e-05	0.784471	0.998355
1437932_a_at	1450014_at	8.00529e-05	1.0203	0.998355
1416854_at	1420011_s_at	8.0626e-05	0.809775	0.998347
1418320_at	1452244_at	8.09287e-05	-1.10165	-0.998343
1425784_a_at	1426236_a_at	8.1023e-05	0.722543	0.998342
1416629_at	1424985_a_at	8.11052e-05	-1.28529	-0.998341
1451689_a_at	1456568_at	8.11085e-05	-1.1492	-0.998341
1425606_at	1450658_at	8.11515e-05	-2.04229	-0.99834
1424556_at	1450922_a_at	8.11516e-05	1.18498	0.99834
1423506_a_at	1451972_at	8.13056e-05	1.60484	0.998338
1416321_s_at	1419758_at	8.13555e-05	1.89248	0.998337
1416431_at	1437189_x_at	8.14058e-05	-1.47554	-0.998337
1417858_at	1419475_a_at	8.14762e-05	0.752666	0.998336
1429457_at	1437012_x_at	8.14862e-05	-0.848673	-0.998336
1437750_at	1449741_at	8.16672e-05	-0.887706	-0.998333
1415999_at	1417611_at	8.16784e-05	1.37755	0.998333
1438441_at	1450928_at	8.16787e-05	0.985471	0.998333
1427749_at	1449141_at	8.17649e-05	0.941089	0.998332
1424815_at	1425826_a_at	8.18464e-05	0.887261	0.998331
1422537_a_at	1435176_a_at	8.18563e-05	1.00393	0.998331
1418184_at	1422016_a_at	8.20158e-05	1.04479	0.998328
1424471_at	1437932_a_at	8.20399e-05	-0.586663	-0.998328
1417863_at	1439018_at	8.23447e-05	0.508245	0.998324
1421404_at	1448919_at	8.23534e-05	1.10779	0.998324
1424186_at	1448839_at	8.26017e-05	1.77906	0.998321
1418569_at	1418773_at	8.26758e-05	-1.27612	-0.99832
1419407_at	1427371_at	8.30974e-05	0.797296	0.998314
1426341_at	1452031_at	8.337e-05	0.942951	0.99831
1417863_at	1448529_at	8.33964e-05	-0.456612	-0.99831
1423809_at	1449207_a_at	8.3511e-05	1.00338	0.998308
1419549_at	1424524_at	8.36946e-05	-1.03918	-0.998306
1422562_at	1430889_a_at	8.37999e-05	0.854624	0.998304
1416992_at	1419073_at	8.41439e-05	1.07317	0.9983
1418138_at	1425415_a_at	8.41477e-05	0.585244	0.9983
1418983_at	1425416_s_at	8.41949e-05	0.736841	0.998299
1419524_at	1451047_at	8.43087e-05	0.509322	0.998297
1416120_at	1448226_at	8.43472e-05	0.938678	0.998297
1416992_at	1451371_at	8.52766e-05	0.580149	0.998284
1420712_a_at	1448842_at	8.55709e-05	-0.573251	-0.99828
1425279_at	1451646_at	8.56083e-05	1.00432	0.99828
1416808_at	1424187_at	8.57444e-05	0.887192	0.998278
1432517_a_at	1450974_at	8.5801e-05	1.51033	0.998277
1449158_at	1456676_a_at	8.62726e-05	0.81389	0.998271
1417019_a_at	1417940_s_at	8.62833e-05	1.16451	0.998271
1421596_s_at	1423877_at	8.62937e-05	-0.464148	-0.998271
1422851_at	1450780_s_at	8.63536e-05	0.97937	0.99827
1422606_at	1422748_at	8.63853e-05	-0.794405	-0.99827
1415943_at	1415944_at	8.6408e-05	1.04414	0.998269
1417686_at	1419663_at	8.66189e-05	0.742517	0.998266
1419032_at	1427403_at	8.69565e-05	1.51285	0.998262
1423084_at	1436737_a_at	8.71603e-05	0.37145	0.998259
1427247_at	1427517_at	8.78254e-05	0.95451	0.99825
1417940_s_at	1450692_at	8.80943e-05	0.764002	0.998247
1416630_at	1438261_at	8.82294e-05	-1.07424	-0.998245
1420028_s_at	1455791_at	8.83071e-05	1.07413	0.998244
1424629_at	1424630_a_at	8.84956e-05	1.0664	0.998242
1417618_at	1424401_at	8.86557e-05	0.891478	0.998239
1449038_at	1451698_at	8.88072e-05	-0.887663	-0.998237
1422708_at	1437968_at	8.8828e-05	0.962579	0.998237
1416776_at	1424382_at	8.89507e-05	1.07371	0.998236
1416318_at	1419662_at	8.89945e-05	0.42791	0.998235
1417073_a_at	1435792_at	8.90059e-05	-0.945191	-0.998235
1423555_a_at	1434440_at	8.9185e-05	-1.3382	-0.998232
1416992_at	1417323_at	8.94821e-05	-0.620186	-0.998228
1448783_at	1453278_a_at	9.01602e-05	0.464756	0.99822
1419144_at	1426340_at	9.01787e-05	0.978393	0.998219
1426914_at	1439018_at	9.0391e-05	0.998324	0.998217
1430474_a_at	1438843_x_at	9.06076e-05	1.0324	0.998214
1435370_a_at	1449081_at	9.06214e-05	0.984191	0.998213
1424128_x_at	1449061_a_at	9.07966e-05	1.1086	0.998211
1416933_at	1419474_a_at	9.08111e-05	-0.56849	-0.998211
1418026_at	1422462_at	9.09238e-05	0.897717	0.99821
1424072_at	1426550_at	9.1098e-05	0.884169	0.998207
1416239_at	1421001_a_at	9.1175e-05	0.308055	0.998206
1426867_at	1450344_a_at	9.13041e-05	1.12382	0.998205
1417178_at	1421404_at	9.13063e-05	0.751181	0.998204
1418349_at	1418350_at	9.15015e-05	1.0601	0.998202
1417019_a_at	1419152_at	9.17775e-05	0.862511	0.998198
1415945_at	1439436_x_at	9.17863e-05	1.15941	0.998198
1418652_at	1449456_a_at	9.18435e-05	1.42657	0.998197
1449592_at	1460693_a_at	9.19084e-05	-1.055	-0.998197
1422059_at	1423675_at	9.19501e-05	0.824225	0.998196
1416124_at	1453939_x_at	9.21073e-05	-1.03843	-0.998194
1417164_at	1452244_at	9.21866e-05	0.882039	0.998193
1420655_at	1423797_at	9.2455e-05	1.18176	0.998189
1418507_s_at	1449109_at	9.25026e-05	0.996643	0.998189
1417394_at	1426551_at	9.26086e-05	-1.289	-0.998187
1422607_at	1422708_at	9.28986e-05	2.42812	0.998184
1449984_at	1450060_at	9.33431e-05	-0.282495	-0.998178
1430306_a_at	1452592_at	9.3815e-05	-1.12996	-0.998172
1419076_a_at	1430811_a_at	9.38416e-05	0.859185	0.998171
1424409_at	1452040_a_at	9.40834e-05	1.40596	0.998168
1434440_at	1454959_s_at	9.41644e-05	0.927309	0.998167
1416251_at	1426653_at	9.4193e-05	1.12996	0.998167
1423847_at	1429270_a_at	9.42081e-05	0.917751	0.998167
1419755_at	1424477_at	9.43703e-05	1.60916	0.998165
1422513_at	1450886_at	9.46522e-05	0.936903	0.998161
1417765_a_at	1426225_at	9.47106e-05	0.838678	0.99816
1426652_at	1437805_at	9.49019e-05	-1.36386	-0.998158
1430998_at	1449061_a_at	9.49108e-05	-0.799943	-0.998158
1415994_at	1416318_at	9.51085e-05	2.30785	0.998155
1420370_s_at	1422141_s_at	9.52e-05	2.01394	0.998154
1416302_at	1449101_at	9.52323e-05	1.42623	0.998153
1418818_at	1451637_a_at	9.52362e-05	1.60704	0.998153
1423700_at	1460184_at	9.53297e-05	-0.754986	-0.998152
1421741_at	1425295_at	9.53619e-05	-0.393746	-0.998152
1421327_at	1421328_at	9.53919e-05	1.02157	0.998151
1417019_a_at	1417942_at	9.54225e-05	0.986798	0.998151
1418569_at	1418599_at	9.55996e-05	0.670546	0.998149
1426278_at	1454159_a_at	9.58605e-05	-1.0388	-0.998145
1450883_a_at	1450884_at	9.60009e-05	1.09735	0.998143
1419717_at	1425798_a_at	9.60646e-05	0.557807	0.998143
1419704_at	1428443_a_at	9.62459e-05	0.454703	0.99814
1449587_a_at	1451637_a_at	9.63245e-05	0.983531	0.998139
1426218_at	1426341_at	9.65415e-05	0.737335	0.998136
1420664_s_at	1448842_at	9.65799e-05	0.806089	0.998136
1426341_at	1430889_a_at	9.66778e-05	1.26687	0.998135
1425248_a_at	1448205_at	9.70836e-05	0.707558	0.99813
1424464_s_at	1426562_a_at	9.71409e-05	-1.11342	-0.998129
1432538_a_at	1452334_at	9.71505e-05	0.878777	0.998129
1418773_at	1449141_at	9.73652e-05	-0.794165	-0.998126
1420981_a_at	1424556_at	9.74768e-05	1.14424	0.998124
1417939_at	1451775_s_at	9.75463e-05	1.3879	0.998124
1417411_at	1453596_at	9.7903e-05	-0.559957	-0.998119
1416432_at	1418849_x_at	9.79889e-05	1.70811	0.998118
1419086_at	1451686_x_at	9.80164e-05	2.55589	0.998118
1419268_at	1449335_at	9.80511e-05	-0.480945	-0.998117
1417273_at	1451407_at	9.82603e-05	-1.09017	-0.998114
1418317_at	1418481_at	9.82862e-05	1.95235	0.998114
1416629_at	1451689_a_at	9.86464e-05	-1.23562	-0.998109
1417347_at	1451527_at	9.89012e-05	-0.811259	-0.998106
1418304_at	1422141_s_at	9.93827e-05	1.85541	0.9981
1417541_at	1436872_at	9.93918e-05	1.08601	0.9981
1417299_at	1449171_at	9.94494e-05	1.25588	0.998099
1418194_at	1426662_at	9.95896e-05	0.752303	0.998097
1437716_x_at	1455834_x_at	9.9835e-05	0.930844	0.998094
1417231_at	1417232_at	9.98623e-05	1.11628	0.998094
1424626_at	1425826_a_at	9.98676e-05	0.679277	0.998094
1422851_at	1450781_at	9.99139e-05	0.973976	0.998093
1418243_at	1427345_a_at	9.99324e-05	0.618831	0.998093
1422823_at	1425733_a_at	0.000100207	1.00327	0.99809
1417019_a_at	1425625_at	0.000100421	1.67019	0.998087
1428333_at	1449031_at	0.000100589	1.78115	0.998085
1423412_at	1435176_a_at	0.000100748	0.723085	0.998083
1430306_a_at	1448136_at	0.000100857	-0.955324	-0.998081
1427698_at	1449705_x_at	0.000101247	0.969001	0.998076
1426580_at	1427707_a_at	0.000101379	0.890738	0.998075
1418339_at	1418876_at	0.000101465	1.35286	0.998074
1449158_at	1449416_at	0.000101562	1.21953	0.998072
1423714_at	1423813_at	0.000101822	1.04672	0.998069
1418481_at	1434981_at	0.000101895	1.05333	0.998068
1416805_at	1431995_at	0.000102157	0.784017	0.998065
1448777_at	1450993_at	0.000102456	1.35721	0.998061
1416007_at	1436182_at	0.000102487	1.02188	0.998061
1426550_at	1426551_at	0.000102845	0.988679	0.998056
1448834_at	1453748_a_at	0.000102932	0.965249	0.998055
1416992_at	1423488_at	0.000103001	0.629203	0.998054
1420028_s_at	1449705_x_at	0.000103064	1.00652	0.998053
1423700_at	1432538_a_at	0.000103304	0.970095	0.99805
1426937_at	1436244_a_at	0.000103648	-0.718491	-0.998046
1417639_at	1449466_at	0.000103806	0.872536	0.998044
1421564_at	1424815_at	0.000104055	0.92906	0.998041
1417323_at	1423489_at	0.000104098	-1.03321	-0.99804
1416468_at	1419491_at	0.000104379	1.82117	0.998037
1418673_at	1451828_a_at	0.000104396	-0.55202	-0.998037
1425626_at	1425627_x_at	0.000104772	0.936641	0.998032
1423700_at	1451358_a_at	0.000104811	0.835666	0.998032
1416808_at	1425104_at	0.000104827	-1.14369	-0.998031
1423250_a_at	1450922_a_at	0.000104941	0.915761	0.99803
1416803_at	1437946_x_at	0.000105108	1.07605	0.998028
1417429_at	1422293_a_at	0.000105272	-0.741732	-0.998026
1422535_at	1448952_at	0.000105368	1.22051	0.998025
1415812_at	1420655_at	0.00010559	1.2833	0.998022
1418818_at	1448546_at	0.000105597	2.05077	0.998022
1418602_at	1434074_x_at	0.000105754	-0.908993	-0.99802
1417589_at	1449141_at	0.000105763	0.915278	0.99802
1423352_at	1423353_at	0.000105802	1.13088	0.998019
1416253_at	1460042_at	0.000106183	1.04168	0.998014
1417942_at	1419153_at	0.000106192	0.83409	0.998014
1418496_at	1449158_at	0.000106325	1.30678	0.998013
1423813_at	1434079_s_at	0.00010643	0.79976	0.998011
1418872_at	1448136_at	0.00010655	0.625333	0.99801
1418195_at	1426562_a_at	0.000106569	-1.20806	-0.99801
1416318_at	1451698_at	0.000106591	-0.444873	-0.998009
1449171_at	1452242_at	0.000106599	0.655829	0.998009
1417335_at	1460609_at	0.000106703	0.79817	0.998008
1425369_a_at	1456569_x_at	0.000106744	-1.1459	-0.998007
1423774_a_at	1423775_s_at	0.000106995	0.967437	0.998004
1417687_at	1421174_at	0.000107123	1.4301	0.998003
1420886_a_at	1453677_a_at	0.000107144	1.02656	0.998002
1422537_a_at	1453596_at	0.000107543	1.06211	0.997997
1415850_at	1423412_at	0.000107818	-1.05734	-0.997994
1417133_at	1452592_at	0.000107932	0.81329	0.997993
1432538_a_at	1455972_x_at	0.000108075	-0.767455	-0.997991
1427707_a_at	1435306_a_at	0.000108292	1.01336	0.997988
1417933_at	1451698_at	0.000108559	-0.870301	-0.997985
1417680_at	1421374_a_at	0.000108624	0.591058	0.997984
1420438_at	1448730_at	0.000108765	0.742223	0.997982
1417395_at	1417459_at	0.000108777	-1.45421	-0.997982
1417680_at	1450974_at	0.000108924	0.677612	0.99798
1451689_a_at	1452031_at	0.000108988	-1.38861	-0.99798
1417863_at	1418849_x_at	0.000109083	-0.709405	-0.997978
1422141_s_at	1455431_at	0.000109213	0.802462	0.997977
1418278_at	1451263_a_at	0.000109228	0.305435	0.997977
1423026_at	1451646_at	0.000109264	0.908618	0.997976
1418195_at	1422537_a_at	0.000109353	0.775017	0.997975
1426235_a_at	1451786_at	0.00010936	-1.15521	-0.997975
1451456_at	1454686_at	0.000109459	1.0705	0.997974
1417680_at	1438954_x_at	0.000110144	0.613721	0.997965
1417910_at	1449061_a_at	0.000110439	1.11681	0.997962
1416124_at	1431591_s_at	0.000110463	-0.958203	-0.997961
1424985_a_at	1456568_at	0.000110958	-1.10462	-0.997955
1418199_at	1418649_at	0.000110974	0.193386	0.997955
1418453_a_at	1451152_a_at	0.000110993	0.973416	0.997955
1419693_at	1433893_s_at	0.000111258	-0.53649	-0.997952
1419662_at	1432517_a_at	0.000111684	1.21034	0.997946
1421093_at	1438954_x_at	0.000111743	1.51974	0.997946
1424409_at	1448469_at	0.000112226	-0.808906	-0.99794
1424155_at	1451263_a_at	0.000112472	0.957942	0.997937
1421058_at	1426634_at	0.000112567	-0.268935	-0.997936
1426225_at	1451371_at	0.00011259	1.31655	0.997935
1419144_at	1426341_at	0.000112736	1.12923	0.997933
1437805_at	1438842_at	0.000112899	1.01493	0.997931
1450780_s_at	1450781_at	0.000112957	0.992611	0.997931
1418318_at	1418926_at	0.000112968	-1.59411	-0.997931
1416168_at	1453724_a_at	0.00011299	1.03575	0.99793
1418194_at	1455796_x_at	0.000113166	-1.28765	-0.997928
1426721_s_at	1452161_at	0.000113221	0.994425	0.997928
1425369_a_at	1452031_at	0.000113519	-1.35767	-0.997924
1425369_a_at	1456568_at	0.000113584	-1.12319	-0.997923
1424351_at	1460242_at	0.000113686	-1.16507	-0.997922
1419073_at	1427345_a_at	0.000113852	0.61496	0.99792
1418252_at	1434440_at	0.000113892	-1.24622	-0.997919
1417450_a_at	1451246_s_at	0.000113922	0.968029	0.997919
1423489_at	1448995_at	0.000114417	1.73289	0.997913
1419124_at	1426243_at	0.000114445	-1.41502	-0.997913
1426634_at	1452136_at	0.000114648	1.01361	0.99791
1448529_at	1449145_a_at	0.000114683	0.688852	0.99791
1418100_at	1423674_at	0.000114853	0.847794	0.997908
1437716_x_at	1451246_s_at	0.000115088	0.89919	0.997905
1415894_at	1418872_at	0.00011516	1.52414	0.997904
1418599_at	1449154_at	0.000115255	0.990623	0.997903
1417019_a_at	1419153_at	0.000115371	0.82451	0.997901
1416558_at	1420032_at	0.000115887	2.63612	0.997895
1423259_at	1423260_at	0.000115947	1.00699	0.997894
1417933_at	1425416_s_at	0.00011617	-0.902266	-0.997892
1419073_at	1423488_at	0.000116176	0.585213	0.997892
1418804_at	1449592_at	0.000116347	1.26516	0.99789
1417244_a_at	1423352_at	0.000116488	-1.33753	-0.997888
1420370_s_at	1460416_s_at	0.000116523	2.08381	0.997887
1420028_s_at	1434319_at	0.000116567	-1.34596	-0.997887
1423488_at	1448949_at	0.00011677	1.12917	0.997884
1418736_at	1438914_at	0.00011701	0.767317	0.997882
1423878_at	1453317_a_at	0.000117038	-0.544042	-0.997881
1424694_at	1424695_at	0.000117095	0.960308	0.997881
1418369_at	1423774_a_at	0.000117332	1.03095	0.997878
1417957_a_at	1417958_at	0.000117495	0.991513	0.997876
1421766_at	1448529_at	0.000117595	-0.309671	-0.997874
1417687_at	1431056_a_at	0.000117919	0.509504	0.997871
1418369_at	1423714_at	0.000118102	0.996771	0.997868
1438082_at	1448649_at	0.000118104	0.72323	0.997868
1449038_at	1451371_at	0.000118264	0.782924	0.997866
1420683_at	1426562_a_at	0.000118818	-1.69251	-0.99786
1437968_at	1450684_at	0.00011957	0.416281	0.997851
1416757_at	1434079_s_at	0.000119641	0.687236	0.99785
1420576_at	1452243_at	0.000119961	-1.33415	-0.997846
1423281_at	1425837_a_at	0.000120263	0.460763	0.997842
1416757_at	1436872_at	0.000120331	0.786661	0.997842
1428443_a_at	1453851_a_at	0.000120374	-1.09626	-0.997841
1417851_at	1426906_at	0.000120679	0.451044	0.997837
1415894_at	1450805_at	0.000120828	2.74735	0.997836
1416630_at	1426634_at	0.000121203	-0.756738	-0.997831
1423911_at	1438082_at	0.000121242	1.08948	0.997831
1416211_a_at	1450947_at	0.000121578	-0.854008	-0.997827
1420712_a_at	1448925_at	0.000121792	-1.07423	-0.997824
1418400_at	1422140_at	0.000122054	-0.705533	-0.997821
1433515_s_at	1454633_at	0.000122126	1.03538	0.99782
1417394_at	1417459_at	0.00012223	-1.4475	-0.997819
1432517_a_at	1448301_s_at	0.000122428	1.98405	0.997817
1430811_a_at	1448650_a_at	0.000122446	1.14346	0.997816
1416936_at	1451969_s_at	0.000122517	1.09337	0.997816
1419397_at	1422462_at	0.000122549	0.908814	0.997815
1418397_at	1421001_a_at	0.000122767	-0.326464	-0.997813
1415811_at	1430474_a_at	0.000122782	-1.27222	-0.997812
1417394_at	1426550_at	0.000122785	-1.30074	-0.997812
1426039_a_at	1428816_a_at	0.000122978	1.21208	0.99781
1417839_at	1459889_at	0.000123069	1.34114	0.997809
1426218_at	1426340_at	0.00012315	0.638455	0.997808
1416118_at	1436872_at	0.000123153	1.09197	0.997808
1418788_at	1424233_at	0.000123158	0.872817	0.997808
1423260_at	1455298_at	0.000123588	0.985082	0.997803
1417872_at	1423619_at	0.000123662	1.1315	0.997802
1426569_a_at	1433515_s_at	0.000123718	0.63678	0.997801
1422059_at	1430811_a_at	0.000123736	0.760593	0.997801
1422535_at	1423674_at	0.000123775	1.0539	0.997801
1431542_at	1438843_x_at	0.000123907	0.741193	0.997799
1424630_a_at	1438852_x_at	0.000123936	0.840337	0.997799
1415812_at	1449147_at	0.000123951	1.20109	0.997799
1418252_at	1423555_a_at	0.000123988	0.929503	0.997798
1416809_at	1450958_at	0.000124005	0.378013	0.997798
1417541_at	1437716_x_at	0.000124177	1.07685	0.997796
1418849_x_at	1448842_at	0.000124307	0.536366	0.997794
1419089_at	1450716_at	0.000124311	1.03335	0.997794
1421058_at	1452136_at	0.000124469	-0.273128	-0.997792
1417680_at	1421173_at	0.000125186	0.787542	0.997784
1418339_at	1418877_at	0.000125194	1.31583	0.997784
1420718_at	1449650_at	0.000125369	-0.716044	-0.997782
1424113_at	1425415_a_at	0.000125694	-1.02259	-0.997778
1417926_at	1437803_at	0.000125945	2.58747	0.997775
1417587_at	1455791_at	0.000126067	0.87989	0.997774
1452242_at	1453683_a_at	0.000126163	1.06997	0.997772
1439018_at	1449158_at	0.00012656	-1.16402	-0.997768
1424509_at	1426005_at	0.000126836	2.7845	0.997765
1424266_s_at	1448925_at	0.00012694	1.80635	0.997763
1419301_at	1421173_at	0.000127447	1.33185	0.997757
1426580_at	1452115_a_at	0.000127673	1.02669	0.997755
1425145_at	1437902_s_at	0.000128112	0.6838	0.99775
1419073_at	1423489_at	0.000128192	0.596966	0.997749
1439018_at	1448529_at	0.000128354	-0.896397	-0.997747
1448899_s_at	1451775_s_at	0.000128387	1.4881	0.997746
1421051_s_at	1428621_a_at	0.000128429	0.980194	0.997746
1421093_at	1448649_at	0.000128632	0.866144	0.997743
1417178_at	1449416_at	0.000128638	1.22769	0.997743
1420998_at	1450082_s_at	0.00012882	0.959319	0.997741
1427247_at	1427516_a_at	0.000128826	0.948572	0.997741
1420718_at	1436881_x_at	0.000128867	1.24709	0.997741
1417765_a_at	1422677_at	0.000128873	1.20005	0.997741
1420029_at	1426652_at	0.000129019	0.972514	0.997739
1423774_a_at	1423877_at	0.000129428	0.876142	0.997734
1419378_a_at	1422651_at	0.00012964	0.435144	0.997732
1417395_at	1426551_at	0.000129695	-1.29417	-0.997731
1420726_x_at	1420727_a_at	0.000130004	0.912624	0.997727
1419556_at	1450923_at	0.000130283	1.88862	0.997724
1421134_at	1423614_at	0.00013035	2.59665	0.997723
1420981_a_at	1450922_a_at	0.000130377	1.35761	0.997723
1417942_at	1419397_at	0.000130528	1.05419	0.997721
1450014_at	1452652_at	0.000130587	-1.48543	-0.997721
1418782_at	1420438_at	0.000130794	1.30706	0.997718
1421546_a_at	1423775_s_at	0.000131166	1.28	0.997714
1419397_at	1425625_at	0.000131175	1.59832	0.997714
1419378_a_at	1449321_x_at	0.000131367	1.92103	0.997712
1437012_x_at	1437932_a_at	0.000131392	-0.620769	-0.997711
1432538_a_at	1460184_at	0.000131535	-0.776399	-0.99771
1418877_at	1425798_a_at	0.000131643	0.774943	0.997708
1416134_at	1449450_at	0.00013195	-0.80067	-0.997705
1419550_a_at	1425109_at	0.000132045	1.16268	0.997704
1418341_at	1425144_at	0.00013207	1.41059	0.997703
1418051_at	1455791_at	0.000132287	0.744986	0.997701
1449434_at	1460256_at	0.000132564	0.996801	0.997698
1419549_at	1426911_at	0.000132596	1.20411	0.997697
1420688_a_at	1451966_at	0.000133406	1.02452	0.997688
1425248_a_at	1425249_a_at	0.000133464	1.04722	0.997687
1435306_a_at	1460168_at	0.000133493	1.6567	0.997687
1417644_at	1455531_at	0.000133608	-0.714405	-0.997686
1425248_a_at	1451679_at	0.00013363	-0.498434	-0.997685
1418400_at	1455531_at	0.000133698	-0.389278	-0.997685
1418281_at	1420032_at	0.000133799	1.94085	0.997683
1421424_a_at	1451407_at	0.000133849	0.878507	0.997683
1416302_at	1448293_at	0.000133916	0.950633	0.997682
1428357_at	1437716_x_at	0.000133993	-0.839301	-0.997681
1421058_at	1421571_a_at	0.000134079	0.344692	0.99768
1417702_a_at	1436563_at	0.000134146	1.62325	0.997679
1416978_at	1448919_at	0.000134411	0.793777	0.997676
1417858_at	1419549_at	0.000134567	0.922908	0.997675
1418164_at	1419603_at	0.000134765	0.740879	0.997672
1425784_a_at	1451407_at	0.000134873	-0.535718	-0.997671
1417574_at	1418804_at	0.000134899	0.918464	0.997671
1449896_at	1450684_at	0.000135442	0.46952	0.997664
1430127_a_at	1437932_a_at	0.0001355	-0.835941	-0.997664
1418788_at	1418979_at	0.000135523	0.648332	0.997664
1418243_at	1448949_at	0.000135742	0.666107	0.997661
1417073_a_at	1419057_at	0.000135848	-0.762241	-0.99766
1420655_at	1423084_at	0.000135991	2.2451	0.997658
1422567_at	1423412_at	0.000136292	-0.838059	-0.997655
1416757_at	1423714_at	0.000136313	0.817571	0.997654
1416930_at	1449885_at	0.000136329	-1.56685	-0.997654
1421424_a_at	1426236_a_at	0.000136338	-1.18404	-0.997654
1419570_at	1419571_at	0.000136431	0.926311	0.997653
1423489_at	1427345_a_at	0.000136439	1.02755	0.997653
1416211_a_at	1451320_at	0.00013649	-0.936246	-0.997652
1430127_a_at	1452652_at	0.000136497	1.27191	0.997652
1417795_at	1449403_at	0.00013687	1.45457	0.997648
1417210_at	1419608_a_at	0.000136922	0.134759	0.997648
1424008_a_at	1425216_at	0.000137381	1.08153	0.997642
1419549_at	1426236_a_at	0.000137548	-1.08111	-0.99764
1423280_at	1437582_at	0.000137678	-0.384219	-0.997639
1426153_a_at	1437750_at	0.000137798	-1.1187	-0.997637
1417618_at	1449104_at	0.0001378	0.735764	0.997637
1417939_at	1448899_s_at	0.000137806	0.930111	0.997637
1424470_a_at	1437012_x_at	0.00013815	0.949333	0.997633
1418091_at	1439373_x_at	0.000138234	1.08063	0.997632
1427213_at	1437644_at	0.000138267	1.87974	0.997632
1417459_at	1423523_at	0.000138305	0.583513	0.997632
1415999_at	1425737_at	0.000138365	0.864865	0.997631
1416203_at	1418733_at	0.000138433	1.06834	0.99763
1422140_at	1422141_s_at	0.000138508	0.858578	0.997629
1451407_at	1452919_a_at	0.000138596	1.34104	0.997628
1428074_at	1450014_at	0.000138743	-0.748316	-0.997627
1417552_at	1424409_at	0.000138933	-0.884842	-0.997625
1417429_at	1424186_at	0.000139141	0.66205	0.997622
1417323_at	1448250_at	0.000139155	-1.18315	-0.997622
1418804_at	1448649_at	0.000139164	0.672797	0.997622
1420029_at	1427698_at	0.00013923	1.01008	0.997621
1452315_at	1460168_at	0.000139474	1.49463	0.997618
1424128_x_at	1451246_s_at	0.000139527	1.06022	0.997618
1423858_a_at	1448839_at	0.000139582	0.841371	0.997617
1422820_at	1451966_at	0.000139669	1.10418	0.997616
1418304_at	1435792_at	0.000139907	1.87018	0.997613
1422462_at	1451358_a_at	0.000139967	0.927827	0.997613
1418499_a_at	1423851_a_at	0.000140119	0.710022	0.997611
1426721_s_at	1427516_a_at	0.000140171	-1.22118	-0.99761
1426653_at	1449705_x_at	0.000140584	0.953091	0.997606
1417541_at	1434079_s_at	0.000140606	0.94827	0.997605
1422678_at	1450639_at	0.000140754	1.64909	0.997604
1437806_x_at	1438842_at	0.000140913	1.0323	0.997602
1417178_at	1417429_at	0.000141044	1.11626	0.997601
1417092_at	1434745_at	0.000141047	0.596047	0.9976
1417588_at	1427749_at	0.000141092	1.04424	0.9976
1416008_at	1436182_at	0.000141152	1.03786	0.997599
1426562_a_at	1453596_at	0.000141193	-0.681135	-0.997599
1417164_at	1426937_at	0.000141203	1.02916	0.997599
1416203_at	1424463_at	0.000141358	-1.13331	-0.997597
1418203_at	1435504_at	0.000141878	0.969491	0.997591
1423506_a_at	1427183_at	0.000142471	0.776381	0.997584
1419551_s_at	1425109_at	0.000142492	1.22101	0.997584
1417358_s_at	1451527_at	0.000142609	0.723749	0.997583
1417933_at	1448250_at	0.000142937	0.973208	0.997579
1434273_at	1434736_at	0.000142967	1.11392	0.997579
1422016_a_at	1423813_at	0.000143451	0.971546	0.997573
1436244_a_at	1450673_at	0.000143527	0.869804	0.997572
1417574_at	1449592_at	0.000143715	1.16434	0.99757
1419643_s_at	1425597_a_at	0.00014417	-3.85393	-0.997565
1434319_at	1437805_at	0.000144479	1.01055	0.997562
1423084_at	1427213_at	0.000144599	0.605469	0.99756
1418252_at	1427510_at	0.000144635	-1.31756	-0.99756
1417940_s_at	1419153_at	0.000144804	0.706562	0.997558
1418304_at	1460416_s_at	0.000144881	1.91925	0.997557
1417358_s_at	1425826_a_at	0.000144908	0.796151	0.997557
1418194_at	1428788_at	0.000144972	0.846098	0.997556
1418496_at	1448251_at	0.000145058	1.04188	0.997555
1417680_at	1421404_at	0.000145062	0.403549	0.997555
1416168_at	1449143_at	0.000145233	-1.00302	-0.997553
1417445_at	1419397_at	0.000145251	0.997784	0.997553
1423775_s_at	1423809_at	0.000145281	0.83763	0.997553
1438954_x_at	1449104_at	0.000145349	0.967492	0.997552
1418872_at	1450805_at	0.000145457	1.79826	0.997551
1437932_a_at	1438850_at	0.000145893	1.04278	0.997546
1417358_s_at	1423797_at	0.000145956	1.09002	0.997545
1421766_at	1426914_at	0.000145963	0.344532	0.997545
1415850_at	1426063_a_at	0.000146018	1.18278	0.997544
1419492_s_at	1420533_at	0.000146172	1.20869	0.997543
1417588_at	1419032_at	0.000146436	1.13563	0.99754
1416309_at	1417911_at	0.000146445	0.892604	0.99754
1419057_at	1422823_at	0.000146626	-1.37291	-0.997538
1450692_at	1450886_at	0.000146653	1.29361	0.997537
1418496_at	1421404_at	0.000146736	0.976067	0.997536
1417015_at	1417568_at	0.000146802	0.59901	0.997536
1428357_at	1448878_at	0.000146919	-1.03141	-0.997534
1424030_at	1449147_at	0.000146962	-0.979937	-0.997534
1419504_at	1451054_at	0.000147203	0.594798	0.997531
1422059_at	1448650_a_at	0.000147214	0.871372	0.997531
1418818_at	1420764_at	0.000147381	1.0016	0.997529
1425597_a_at	1425733_a_at	0.000147429	0.886836	0.997529
1420011_s_at	1421001_a_at	0.000147603	0.393249	0.997527
1419504_at	1449466_at	0.000147729	0.888754	0.997525
1425233_at	1448783_at	0.000147782	-2.96594	-0.997525
1435945_a_at	1452919_a_at	0.000147831	1.63137	0.997524
1422140_at	1426978_at	0.00014796	-0.949146	-0.997523
1436737_a_at	1451527_at	0.000148012	0.936407	0.997522
1417232_at	1419088_at	0.000148085	-1.5148	-0.997521
1426914_at	1449145_a_at	0.000148226	-0.618704	-0.99752
1417541_at	1418369_at	0.000148286	1.12948	0.997519
1418369_at	1423813_at	0.000148429	1.04499	0.997517
1421381_a_at	1422607_at	0.000148643	0.992943	0.997515
1417411_at	1423412_at	0.000148731	-0.729894	-0.997514
1418264_at	1448650_a_at	0.000149161	1.16388	0.997509
1423813_at	1437716_x_at	0.000149206	0.907576	0.997509
1416757_at	1437716_x_at	0.000149403	0.780006	0.997507
1418155_at	1450917_at	0.000149882	1.47931	0.997501
1448250_at	1448251_at	0.000150096	1.00062	0.997499
1415943_at	1437279_x_at	0.000150387	0.997648	0.997496
1416854_at	1425032_at	0.000150397	0.285359	0.997496
1419571_at	1449984_at	0.000150531	-2.73289	-0.997494
1418190_at	1425104_at	0.000150881	-0.801269	-0.99749
1452231_x_at	1452348_s_at	0.000150897	1.10227	0.99749
1423280_at	1437583_x_at	0.000150984	-0.375137	-0.997489
1418932_at	1425546_a_at	0.000151048	-0.569728	-0.997488
1417686_at	1421173_at	0.000151133	1.53021	0.997487
1417938_at	1450886_at	0.000151199	1.03907	0.997487
1417450_a_at	1439436_x_at	0.000151384	1.10982	0.997485
1417429_at	1448919_at	0.000151525	0.744398	0.997483
1427165_at	1449490_at	0.000151632	0.772026	0.997482
1427707_a_at	1452115_a_at	0.000151651	1.1501	0.997482
1420683_at	1449319_at	0.000151676	-1.4663	-0.997481
1417092_at	1437946_x_at	0.000151706	0.866992	0.997481
1424041_s_at	1435833_at	0.000151964	1.65122	0.997478
1417450_a_at	1449061_a_at	0.000151965	1.01115	0.997478
1421681_at	1460693_a_at	0.000152259	-1.2159	-0.997475
1416757_at	1418369_at	0.000152409	0.818322	0.997473
1416623_at	1418652_at	0.000152477	0.680078	0.997473
1420633_a_at	1450240_a_at	0.000152723	2.06094	0.99747
1416122_at	1416306_at	0.000152809	1.9109	0.997469
1417858_at	1426235_a_at	0.000153232	-1.05096	-0.997464
1422708_at	1450684_at	0.000153609	0.401254	0.99746
1417346_at	1417347_at	0.000153703	1.03738	0.997459
1417395_at	1423523_at	0.0001539	-0.850117	-0.997457
1417645_at	1421001_a_at	0.000153988	-0.296146	-0.997456
1416808_at	1452004_at	0.000154019	1.75601	0.997455
1419551_s_at	1450673_at	0.000154131	0.97771	0.997454
1415894_at	1448136_at	0.000154213	0.954567	0.997453
1417346_at	1436737_a_at	0.000154411	-0.898205	-0.997451
1422820_at	1449081_at	0.000154462	0.671969	0.997451
1420447_at	1448254_at	0.000154521	-0.503906	-0.99745
1448469_at	1452004_at	0.000154544	1.78845	0.99745
1417926_at	1448650_a_at	0.000154576	1.34855	0.997449
1424008_a_at	1451322_at	0.000154772	0.651627	0.997447
1420712_a_at	1422606_at	0.000155032	1.04474	0.997444
1423093_at	1430474_a_at	0.000155105	-0.975212	-0.997444
1417884_at	1450923_at	0.00015515	0.821721	0.997443
1425842_at	1449453_at	0.000155157	0.490476	0.997443
1419268_at	1425032_at	0.000155209	0.13627	0.997442
1430811_a_at	1437803_at	0.000155334	2.19241	0.997441
1418453_a_at	1439036_a_at	0.000155389	0.941552	0.99744
1417541_at	1423714_at	0.000155829	1.12814	0.997436
1427161_at	1453683_a_at	0.000155949	1.03888	0.997434
1424401_at	1438954_x_at	0.000156092	0.849301	0.997433
1427161_at	1452334_at	0.000156213	1.00083	0.997431
1417552_at	1452040_a_at	0.000156327	-1.24609	-0.99743
1418734_at	1451644_a_at	0.000156473	0.916636	0.997429
1417335_at	1425127_at	0.000156612	1.61301	0.997427
1417645_at	1420886_a_at	0.000156795	-0.736958	-0.997425
1425249_a_at	1449031_at	0.000157225	-0.842773	-0.99742
1424838_at	1438453_at	0.000157253	1.09614	0.99742
1418648_at	1449265_at	0.000157468	1.19966	0.997418
1421429_a_at	1426560_a_at	0.000157523	0.938326	0.997417
1418835_at	1426634_at	0.000157654	0.98783	0.997416
1422607_at	1436565_at	0.000157857	1.20662	0.997413
1422430_at	1425625_at	0.000157864	1.76405	0.997413
1449388_at	1452592_at	0.000157947	-0.95426	-0.997412
1422607_at	1428571_at	0.000158151	0.964944	0.99741
1417299_at	1448145_at	0.000158197	1.00909	0.99741
1416007_at	1460242_at	0.000158227	1.22493	0.997409
1424842_a_at	1435870_at	0.000158582	1.17208	0.997405
1423675_at	1448952_at	0.0001587	1.14708	0.997404
1418818_at	1449587_a_at	0.000158881	1.62969	0.997402
1419089_at	1423523_at	0.000158924	-0.481236	-0.997402
1419402_at	1428983_at	0.000158948	1.29116	0.997401
1417552_at	1452004_at	0.000159032	1.28572	0.997401
1431542_at	1448654_at	0.000159423	0.749427	0.997396
1418762_at	1424351_at	0.000159449	-0.873366	-0.997396
1423523_at	1426301_at	0.000159465	-1.84016	-0.997396
1427038_at	1450014_at	0.000159635	-0.541867	-0.997394
1423809_at	1432538_a_at	0.000160404	1.13856	0.997386
1419301_at	1421404_at	0.000160508	0.682361	0.997384
1436565_at	1437968_at	0.000160593	1.93388	0.997384
1423619_at	1451698_at	0.000160672	-0.667502	-0.997383
1416978_at	1426708_at	0.000160705	0.922156	0.997382
1417074_at	1436565_at	0.000161174	1.05574	0.997377
1448573_a_at	1450684_at	0.000161354	0.838938	0.997375
1417910_at	1451246_s_at	0.000161764	1.06807	0.997371
1419551_s_at	1426937_at	0.000162063	-1.55749	-0.997368
1418195_at	1424463_at	0.000162271	0.979009	0.997365
1422308_a_at	1448499_a_at	0.000162404	-0.93686	-0.997364
1418194_at	1426562_a_at	0.000162423	-1.19257	-0.997364
1422016_a_at	1423877_at	0.000162462	0.841196	0.997363
1427345_a_at	1448649_at	0.000162603	0.903431	0.997362
1449984_at	1450774_at	0.000162661	-0.866446	-0.997361
1418486_at	1425215_at	0.000162738	0.854534	0.99736
1423774_a_at	1437716_x_at	0.000162774	0.920137	0.99736
1417910_at	1417911_at	0.000163444	0.978188	0.997353
1419301_at	1419674_a_at	0.000163638	1.21093	0.997351
1419073_at	1448949_at	0.000163715	0.661848	0.99735
1428803_at	1460388_at	0.000164002	0.969861	0.997347
1424630_a_at	1455791_at	0.000164323	1.0259	0.997343
1417273_at	1426911_at	0.000164411	-1.63519	-0.997342
1416978_at	1424187_at	0.000164435	0.682287	0.997342
1417644_at	1418765_at	0.00016467	-0.853462	-0.997339
1423877_at	1432538_a_at	0.000164767	1.05532	0.997338
1420054_s_at	1423305_at	0.000164767	0.826936	0.997338
1424266_s_at	1451972_at	0.000165317	2.03794	0.997332
1417795_at	1449450_at	0.000165522	-1.65807	-0.99733
1416008_at	1418762_at	0.000165608	1.2174	0.997329
1416623_at	1452349_x_at	0.000165632	0.41566	0.997329
1422678_at	1451371_at	0.000165846	0.950161	0.997327
1438954_x_at	1448919_at	0.000165866	0.727991	0.997327
1418496_at	1419301_at	0.000165964	1.42638	0.997326
1424208_at	1424797_a_at	0.000165983	1.64104	0.997325
1425251_at	1449388_at	0.000165986	-0.661438	-0.997325
1417445_at	1455990_at	0.000166155	1.19175	0.997323
1417618_at	1438954_x_at	0.000166192	0.758385	0.997323
1419343_at	1454633_at	0.000166499	0.520562	0.99732
1418804_at	1421681_at	0.000166653	1.09632	0.997318
1420688_a_at	1435370_a_at	0.000167012	0.632245	0.997314
1424266_s_at	1448842_at	0.000167118	0.963062	0.997313
1416309_at	1431274_a_at	0.000168177	-1.28802	-0.997302
1418369_at	1434079_s_at	0.000168237	0.837228	0.997301
1424208_at	1426605_at	0.000168451	1.12336	0.997299
1416749_at	1452919_a_at	0.000168558	-1.42354	-0.997298
1422462_at	1425625_at	0.000168565	1.75412	0.997298
1417290_at	1427433_s_at	0.000168611	-2.49416	-0.997297
1419556_at	1423305_at	0.00016878	1.7457	0.997295
1449171_at	1452337_at	0.000168781	0.969451	0.997295
1417210_at	1418499_a_at	0.000169167	0.1941	0.997291
1417940_s_at	1437175_at	0.000169227	0.965352	0.997291
1418804_at	1460693_a_at	0.000169253	-1.33635	-0.99729
1424072_at	1426551_at	0.000169649	0.875053	0.997286
1436182_at	1460242_at	0.000169875	1.19623	0.997284
1437611_x_at	1450677_at	0.000169968	1.48266	0.997283
1419032_at	1419755_at	0.00017014	0.766667	0.997281
1417235_at	1428571_at	0.000170421	0.542547	0.997278
1418113_at	1431771_a_at	0.00017071	-0.723285	-0.997275
1421093_at	1449528_at	0.000170835	1.61576	0.997273
1423809_at	1437716_x_at	0.000171055	1.13033	0.997271
1415994_at	1451698_at	0.000171151	-1.02783	-0.99727
1434079_s_at	1450993_at	0.00017133	1.37471	0.997268
1426580_at	1435306_a_at	0.000171489	0.903725	0.997266
1427161_at	1449207_a_at	0.000171521	1.0007	0.997266
1423280_at	1425837_a_at	0.000171622	0.434917	0.997265
1417702_a_at	1420549_at	0.000172011	0.861439	0.997261
1419270_a_at	1436872_at	0.000172012	0.70177	0.997261
1423506_a_at	1425416_s_at	0.000172148	-0.867811	-0.997259
1420031_at	1450920_at	0.000172196	0.494702	0.997259
1416159_at	1434628_a_at	0.000172248	-1.15217	-0.997258
1434319_at	1437806_x_at	0.000173225	0.992906	0.997248
1417089_a_at	1432418_a_at	0.000173357	1.03521	0.997247
1417009_at	1426340_at	0.000173381	1.00237	0.997246
1423488_at	1448995_at	0.00017364	1.76676	0.997244
1417235_at	1420764_at	0.00017364	0.557467	0.997244
1418496_at	1448919_at	0.000173788	1.08277	0.997242
1419663_at	1432517_a_at	0.000173914	1.16946	0.997241
1426571_at	1451498_at	0.000174413	1.6139	0.997235
1417757_at	1417884_at	0.000174654	1.28031	0.997233
1427403_at	1427749_at	0.000174691	0.605037	0.997233
1418320_at	1421038_a_at	0.000174704	0.524657	0.997232
1455431_at	1460416_s_at	0.00017477	1.28357	0.997232
1423276_at	1424464_s_at	0.0001748	1.30537	0.997231
1426652_at	1455791_at	0.000174811	1.07304	0.997231
1429457_at	1437946_x_at	0.000174976	-0.914568	-0.99723
1420447_at	1451320_at	0.000175226	0.461464	0.997227
1418919_at	1423700_at	0.000175455	1.04396	0.997225
1419550_a_at	1426937_at	0.000175848	-1.48268	-0.99722
1415850_at	1422567_at	0.000175853	1.25772	0.99722
1421093_at	1424400_a_at	0.000175917	1.20468	0.99722
1417074_at	1426571_at	0.000176118	1.25171	0.997218
1425249_a_at	1449249_at	0.000176139	-1.69598	-0.997217
1419073_at	1421681_at	0.000176316	0.907336	0.997215
1422677_at	1451371_at	0.000176763	0.919042	0.997211
1417429_at	1419301_at	0.000176874	0.980278	0.99721
1418100_at	1423675_at	0.0001769	0.852919	0.997209
1415944_at	1437279_x_at	0.000176923	0.953548	0.997209
1448852_at	1449184_at	0.000176981	0.312047	0.997208
1426652_at	1438842_at	0.000177155	-1.38577	-0.997207
1451358_a_at	1460184_at	0.000177295	-0.90082	-0.997205
1418601_at	1425000_s_at	0.000177308	-1.84702	-0.997205
1422970_at	1424630_a_at	0.00017743	0.764737	0.997204
1425558_at	1448752_at	0.000177505	1.04852	0.997203
1426243_at	1426562_a_at	0.000177572	0.816033	0.997202
1423259_at	1455298_at	0.000178075	0.993461	0.997197
1420011_s_at	1420886_a_at	0.000178231	0.978304	0.997195
1419282_at	1419998_at	0.000178476	0.90245	0.997193
1450995_at	1455802_x_at	0.000178744	4.66102	0.99719
1416225_at	1421374_a_at	0.000179051	1.08122	0.997187
1427403_at	1449141_at	0.000179195	0.570318	0.997185
1418027_at	1421596_s_at	0.000179233	-2.03131	-0.997185
1416309_at	1416310_at	0.000179375	1.02395	0.997183
1426225_at	1460693_a_at	0.000179417	-2.69902	-0.997183
1417788_at	1448250_at	0.000179589	1.26288	0.997181
1417910_at	1455834_x_at	0.000179792	1.10525	0.997179
1418339_at	1432829_at	0.000179948	-0.92586	-0.997177
1417429_at	1424187_at	0.000179964	0.639862	0.997177
1422970_at	1434079_s_at	0.000179991	0.669626	0.997177
1425248_a_at	1428333_at	0.000180157	-0.495581	-0.997175
1424626_at	1424815_at	0.000180255	0.763607	0.997174
1419124_at	1420683_at	0.000180311	0.682186	0.997174
1418243_at	1423488_at	0.000180818	0.588369	0.997168
1425233_at	1453278_a_at	0.000180957	-1.3804	-0.997167
1438932_at	1438933_x_at	0.000181034	1.01539	0.997166
1417133_at	1425251_at	0.000181059	1.28068	0.997166
1417164_at	1426634_at	0.000181064	-0.568171	-0.997166
1421021_at	1437328_x_at	0.000181106	-1.15707	-0.997165
1419570_at	1425290_at	0.000181458	2.36058	0.997162
1425251_at	1430306_a_at	0.000182475	-0.558914	-0.997151
1423813_at	1436872_at	0.00018251	0.914683	0.997151
1416124_at	1448229_s_at	0.000182529	1.02154	0.99715
1436872_at	1455834_x_at	0.000182798	0.922404	0.997148
1418911_s_at	1433531_at	0.000182801	0.997732	0.997148
1423774_a_at	1424128_x_at	0.000182987	0.779993	0.997146
1417680_at	1418496_at	0.00018332	0.412254	0.997142
1449031_at	1451679_at	0.000183731	0.561685	0.997138
1418184_at	1423877_at	0.000183731	0.880146	0.997138
1424072_at	1426300_at	0.000184252	-1.1867	-0.997132
1416629_at	1449147_at	0.000184332	1.23811	0.997132
1417299_at	1423775_s_at	0.000184468	1.00929	0.99713
1452534_a_at	1455990_at	0.000184617	1.38244	0.997129
1418304_at	1422140_at	0.000184752	2.15381	0.997127
1417411_at	1426063_a_at	0.000184776	0.816541	0.997127
1420029_at	1451417_at	0.000185928	0.998693	0.997115
1448145_at	1449207_a_at	0.000186165	0.841914	0.997113
1417568_at	1420764_at	0.000186379	0.784658	0.99711
1420054_s_at	1450923_at	0.000186435	0.894046	0.99711
1417178_at	1418496_at	0.000186484	0.766861	0.997109
1417273_at	1421424_a_at	0.00018663	-1.23681	-0.997108
1424113_at	1448973_at	0.000187044	-1.8141	-0.997104
1417273_at	1426236_a_at	0.00018724	1.46787	0.997102
1416757_at	1422016_a_at	0.00018765	0.879904	0.997097
1448205_at	1451679_at	0.000187885	-0.702709	-0.997095
1435532_at	1460042_at	0.000188357	0.447558	0.99709
1421424_a_at	1426243_at	0.000188422	-2.0976	-0.997089
1417588_at	1419755_at	0.000188493	0.872628	0.997089
1423891_at	1424362_at	0.000188494	1.92371	0.997089
1418765_at	1453677_a_at	0.000188633	1.0425	0.997087
1437932_a_at	1438851_x_at	0.00018881	1.0284	0.997085
1417178_at	1448919_at	0.00018892	0.832611	0.997084
1418194_at	1426236_a_at	0.000188967	-0.821936	-0.997084
1418184_at	1449207_a_at	0.000189006	0.819934	0.997083
1448154_at	1449101_at	0.000189278	1.00806	0.997081
1424401_at	1449528_at	0.000189537	0.90325	0.997078
1421564_at	1421921_at	0.00018964	2.18644	0.997077
1416527_at	1437644_at	0.000189657	2.10537	0.997077
1416194_at	1428074_at	0.00018981	0.896541	0.997075
1417073_a_at	1422141_s_at	0.000189838	-0.936181	-0.997075
1417863_at	1449145_a_at	0.000190111	-0.314806	-0.997072
1416978_at	1418496_at	0.000190317	0.730631	0.99707
1417235_at	1417569_at	0.000190647	0.665678	0.997066
1438511_a_at	1450883_a_at	0.000190869	0.676163	0.997064
1425260_at	1460292_a_at	0.00019111	1.47601	0.997062
1428788_at	1438251_x_at	0.000191238	-0.692176	-0.99706
1416120_at	1452954_at	0.000191249	0.967308	0.99706
1422552_at	1455802_x_at	0.000191526	1.15374	0.997057
1423523_at	1449335_at	0.000191654	-1.95493	-0.997056
1418026_at	1418919_at	0.000191669	0.951402	0.997056
1416664_at	1418281_at	0.000191942	1.23739	0.997053
1427345_a_at	1448949_at	0.000192105	1.07369	0.997052
1425622_at	1427698_at	0.000192265	0.485297	0.99705
1417939_at	1450692_at	0.000192292	0.731483	0.99705
1417541_at	1451128_s_at	0.000192593	1.13986	0.997047
1433471_at	1450461_at	0.000192706	1.05977	0.997045
1416072_at	1418979_at	0.000192712	0.812547	0.997045
1417952_at	1450131_a_at	0.000192762	-0.769333	-0.997045
1417618_at	1438953_at	0.000192826	0.743452	0.997044
1417680_at	1438953_at	0.000192854	0.60125	0.997044
1427545_at	1430889_a_at	0.000192913	-1.31394	-0.997043
1418940_at	1422748_at	0.000193052	-0.363757	-0.997042
1425809_at	1451263_a_at	0.000193908	0.90432	0.997033
1417459_at	1426301_at	0.000194029	-1.07592	-0.997032
1419152_at	1419397_at	0.000194129	1.20532	0.997031
1418773_at	1427403_at	0.000194161	-1.38705	-0.997031
1425415_a_at	1448973_at	0.000194187	1.76996	0.99703
1452160_at	1452161_at	0.000194403	1.02885	0.997028
1417765_a_at	1451698_at	0.00019442	-1.25258	-0.997028
1434735_at	1449885_at	0.000194741	1.01634	0.997025
1432538_a_at	1448145_at	0.000194945	1.03966	0.997023
1418239_at	1418643_at	0.000195028	0.352067	0.997022
1427213_at	1436737_a_at	0.000195364	0.611234	0.997018
1427278_at	1453278_a_at	0.000195568	1.1114	0.997016
1417863_at	1421766_at	0.000195592	1.46947	0.997016
1416617_at	1419556_at	0.000195633	0.806881	0.997016
1424400_a_at	1427345_a_at	0.000195755	0.790948	0.997014
1420533_at	1420534_at	0.000195942	0.908961	0.997012
1416803_at	1437932_a_at	0.000196207	-0.619953	-0.99701
1416757_at	1451128_s_at	0.000196247	0.825852	0.997009
1417073_a_at	1419570_at	0.000196292	-0.600262	-0.997009
1415994_at	1426225_at	0.000196499	0.687234	0.997007
1421327_at	1424187_at	0.000196526	-0.484356	-0.997006
1418094_s_at	1423489_at	0.000196824	0.908101	0.997003
1419152_at	1422430_at	0.000197196	1.09172	0.997
1419144_at	1423506_a_at	0.000197471	0.82179	0.996997
1418264_at	1430811_a_at	0.000197734	1.01512	0.996994
1418849_x_at	1420712_a_at	0.000197764	-0.933298	-0.996994
1418765_at	1455531_at	0.000197909	0.834261	0.996992
1417164_at	1452136_at	0.000197941	-0.577012	-0.996992
1449145_a_at	1449416_at	0.00019798	2.2916	0.996992
1419373_at	1450923_at	0.00019811	1.5659	0.99699
1418003_at	1451512_s_at	0.000198717	0.999559	0.996984
1417541_at	1422016_a_at	0.000199174	1.21427	0.99698
1423523_at	1449334_at	0.000199324	-2.09954	-0.996978
1423523_at	1424362_at	0.000199343	3.13762	0.996978
1422537_a_at	1426562_a_at	0.000199431	-1.55398	-0.996977
1417358_s_at	1437644_at	0.000200118	2.36812	0.99697
1419442_at	1438789_s_at	0.000200132	1.93587	0.99697
1418438_at	1425065_at	0.000200245	0.210877	0.996969
1416933_at	1418940_at	0.000200567	-2.49984	-0.996966
1426571_at	1452251_at	0.000200682	1.41612	0.996964
1418100_at	1460042_at	0.000200699	0.878873	0.996964
1416992_at	1426225_at	0.000200942	0.439165	0.996962
1422170_at	1450913_at	0.000201614	0.543094	0.996955
1420437_at	1425104_at	0.000201669	-0.97501	-0.996954
1425145_at	1428538_s_at	0.000201779	0.690288	0.996953
1418876_at	1432829_at	0.000201817	-0.682899	-0.996953
1422889_at	1430427_a_at	0.000201974	0.945439	0.996951
1416251_at	1434319_at	0.000202195	-1.44209	-0.996949
1417940_s_at	1419397_at	0.000202377	0.892722	0.996947
1424649_a_at	1460372_at	0.000202379	1.66609	0.996947
1416007_at	1418762_at	0.000202425	1.19764	0.996947
1448899_s_at	1449490_at	0.000203003	1.11214	0.996941
1419301_at	1448251_at	0.000203102	0.728029	0.99694
1416749_at	1451407_at	0.000203253	-1.05861	-0.996938
1423714_at	1450993_at	0.000203618	1.15495	0.996935
1419758_at	1419759_at	0.000204055	0.946939	0.99693
1416124_at	1455956_x_at	0.00020416	0.977974	0.996929
1426906_at	1452349_x_at	0.000204325	1.02621	0.996928
1418648_at	1425746_at	0.000204377	1.78799	0.996927
1417939_at	1455990_at	0.000204619	1.02232	0.996925
1415945_at	1451128_s_at	0.000204989	1.18682	0.996921
1418194_at	1419124_at	0.000205022	1.0273	0.996921
1417911_at	1431274_a_at	0.000205326	-1.43889	-0.996918
1416802_a_at	1449249_at	0.000205523	-2.00859	-0.996916
1418511_at	1435371_x_at	0.000205719	0.931734	0.996914
1422748_at	1453596_at	0.000205905	-0.855841	-0.996912
1418184_at	1418369_at	0.000206085	0.969923	0.99691
1421374_a_at	1438954_x_at	0.000206151	1.03515	0.996909
1424797_a_at	1426605_at	0.000206232	0.68244	0.996909
1428788_at	1452919_a_at	0.000206551	0.96631	0.996905
1421404_at	1424186_at	0.000206612	0.983702	0.996905
1421766_at	1449416_at	0.000206617	-0.490863	-0.996905
1418599_at	1449141_at	0.000206802	1.50927	0.996903
1437932_a_at	1452652_at	0.000207404	-1.51683	-0.996897
1416416_x_at	1425626_at	0.000207695	1.10487	0.996894
1425260_at	1449104_at	0.000208038	0.903297	0.996891
1426929_at	1426930_at	0.000208225	0.99175	0.996889
1426005_at	1451528_at	0.000208529	0.504579	0.996886
1426551_at	1450716_at	0.000208663	-1.40596	-0.996884
1417884_at	1424556_at	0.000208762	0.689367	0.996883
1419276_at	1427492_at	0.000208975	1.08831	0.996881
1422605_at	1437902_s_at	0.000209107	1.17074	0.99688
1422537_a_at	1422567_at	0.000209581	-1.64723	-0.996875
1426653_at	1437806_x_at	0.000209584	-1.26825	-0.996875
1417395_at	1426300_at	0.000209723	1.75385	0.996874
1426914_at	1456676_a_at	0.00020988	-0.948276	-0.996872
1423608_at	1451047_at	0.000209942	1.11525	0.996872
1422677_at	1423439_at	0.00020996	0.860367	0.996871
1421374_a_at	1432517_a_at	0.000210196	0.755388	0.996869
1419704_at	1453851_a_at	0.000210197	-0.498915	-0.996869
1417019_a_at	1417445_at	0.000210317	1.04106	0.996868
1417023_a_at	1418278_at	0.000210319	3.35108	0.996868
1437716_x_at	1451128_s_at	0.000210502	1.05598	0.996866
1434079_s_at	1448777_at	0.00021051	1.01053	0.996866
1417872_at	1419662_at	0.000210765	0.727539	0.996863
1418835_at	1453677_a_at	0.000211065	1.13278	0.996861
1438933_x_at	1454613_at	0.000211618	0.859287	0.996855
1424815_at	1451527_at	0.000211663	0.80536	0.996855
1424363_at	1449522_at	0.000211682	1.12296	0.996854
1436170_a_at	1450240_a_at	0.00021217	2.09842	0.99685
1424157_at	1454959_s_at	0.000212213	1.12944	0.996849
1417645_at	1420011_s_at	0.000212974	-0.750749	-0.996842
1423092_at	1439436_x_at	0.000213233	0.939979	0.996839
1421038_a_at	1452919_a_at	0.000213442	1.68487	0.996837
1420559_a_at	1425798_a_at	0.000213504	0.969762	0.996836
1425215_at	1425216_at	0.000213637	0.859104	0.996835
1425145_at	1426721_s_at	0.000213652	0.526618	0.996835
1422561_at	1450658_at	0.000213921	1.06297	0.996832
1435504_at	1437103_at	0.000213932	0.715784	0.996832
1423911_at	1448649_at	0.000214144	0.788837	0.99683
1421327_at	1438851_x_at	0.000214687	0.458785	0.996825
1426930_at	1452240_at	0.000214689	0.983974	0.996825
1417130_s_at	1456515_s_at	0.000214716	-1.82772	-0.996824
1416808_at	1448469_at	0.000215559	0.97873	0.996816
1416936_at	1419331_at	0.000215654	1.68183	0.996815
1416617_at	1419555_at	0.000215876	0.809348	0.996813
1421134_at	1426978_at	0.00021588	2.1663	0.996813
1450301_at	1460746_at	0.000215935	-0.367522	-0.996812
1416623_at	1449456_a_at	0.000215937	0.971286	0.996812
1415812_at	1436737_a_at	0.000216104	1.07328	0.996811
1416008_at	1460242_at	0.000216116	1.24391	0.996811
1427161_at	1434748_at	0.000216164	1.02607	0.99681
1418184_at	1423714_at	0.000216345	0.968757	0.996808
1420998_at	1449265_at	0.00021667	0.760994	0.996805
1415802_at	1449141_at	0.000216862	-0.772198	-0.996803
1419153_at	1422462_at	0.000217014	1.1478	0.996802
1418849_x_at	1456676_a_at	0.000217092	0.679025	0.996801
1420852_a_at	1450026_a_at	0.000217457	0.955508	0.996797
1419124_at	1424463_at	0.000217491	0.937952	0.996797
1448899_s_at	1450886_at	0.000217494	1.0172	0.996797
1418320_at	1421058_at	0.000217516	-2.63188	-0.996797
1449592_at	1450974_at	0.00021778	1.02697	0.996794
1436565_at	1449896_at	0.000217795	1.71327	0.996794
1426340_at	1430889_a_at	0.000217829	1.46063	0.996794
1418496_at	1426708_at	0.000217866	1.25769	0.996793
1417574_at	1448823_at	0.000217881	1.08266	0.996793
1426110_a_at	1449741_at	0.000217881	-0.66207	-0.996793
1416432_at	1423489_at	0.000218084	0.989292	0.996791
1425835_a_at	1430820_a_at	0.000218239	0.991706	0.99679
1422602_a_at	1450884_at	0.000218484	-0.610242	-0.996787
1423489_at	1451371_at	0.000219189	0.900638	0.99678
1420664_s_at	1427213_at	0.000219443	1.44513	0.996778
1418766_s_at	1425400_a_at	0.000219711	1.09671	0.996775
1449368_at	1454633_at	0.000219886	-1.46477	-0.996774
1421134_at	1438261_at	0.000219903	-1.94132	-0.996773
1417568_at	1460372_at	0.000219994	1.18863	0.996773
1416225_at	1418736_at	0.000220281	1.44029	0.99677
1415810_at	1455834_x_at	0.000220359	1.17679	0.996769
1416933_at	1419475_a_at	0.000220401	-0.594456	-0.996769
1426551_at	1449334_at	0.000220624	-1.37924	-0.996766
1419662_at	1451698_at	0.000220749	-1.03651	-0.996765
1418369_at	1432538_a_at	0.00022085	0.956866	0.996764
1420683_at	1425606_at	0.000221065	0.857044	0.996762
1416652_at	1431824_at	0.000221154	1.28676	0.996761
1417015_at	1424649_a_at	0.000221389	0.427092	0.996759
1438694_at	1450240_a_at	0.000221881	2.11925	0.996754
1438842_at	1455791_at	0.000221903	-0.771797	-0.996754
1417429_at	1425104_at	0.000221927	-0.824706	-0.996754
1426340_at	1451689_a_at	0.000221928	-0.78117	-0.996754
1421327_at	1438850_at	0.000221946	0.464952	0.996753
1421374_a_at	1438914_at	0.000222201	1.02141	0.996751
1417851_at	1452231_x_at	0.000222215	0.432984	0.996751
1448251_at	1456676_a_at	0.000222333	1.0188	0.99675
1418595_at	1451047_at	0.000222567	1.28995	0.996747
1426570_a_at	1454633_at	0.000222849	0.716588	0.996745
1416122_at	1437946_x_at	0.000222854	1.41517	0.996745
1418424_at	1450344_a_at	0.000222962	0.641468	0.996744
1451786_at	1452232_at	0.000223333	0.875821	0.99674
1417858_at	1419474_a_at	0.000223463	0.717599	0.996739
1423166_at	1438511_a_at	0.000223726	1.46826	0.996736
1438953_at	1448649_at	0.000224079	0.579433	0.996733
1419124_at	1455796_x_at	0.000224253	-1.24808	-0.996731
1417940_s_at	1422513_at	0.000224961	1.05393	0.996724
1429295_s_at	1460236_at	0.000225204	0.689767	0.996722
1420032_at	1430998_at	0.000225302	-0.543772	-0.996721
1416808_at	1427355_at	0.000225535	1.77115	0.996719
1423331_a_at	1448673_at	0.000225632	1.02816	0.996718
1426978_at	1436021_at	0.000226226	-0.555669	-0.996712
1417552_at	1427371_at	0.000226268	1.0053	0.996711
1422430_at	1437175_at	0.000226622	1.1895	0.996708
1421546_a_at	1427161_at	0.000226637	1.07547	0.996708
1426653_at	1437805_at	0.000226761	-1.29016	-0.996707
1417569_at	1423420_at	0.000226848	1.3957	0.996706
1417445_at	1450692_at	0.000227204	0.852076	0.996702
1418317_at	1434981_at	0.000227267	2.05754	0.996702
1415945_at	1417450_a_at	0.000227509	1.04049	0.996699
1416978_at	1424186_at	0.000227628	0.705175	0.996698
1422602_a_at	1439373_x_at	0.000227653	0.978765	0.996698
1438082_at	1449592_at	0.00022772	1.35803	0.996697
1421073_a_at	1424208_at	0.000227928	0.983266	0.996695
1425000_s_at	1460292_a_at	0.000227946	-1.55248	-0.996695
1436880_at	1448000_at	0.000227985	-0.986325	-0.996695
1425546_a_at	1436182_at	0.000228431	1.19879	0.996691
1424629_at	1434079_s_at	0.000228551	0.932343	0.996689
1448529_at	1456676_a_at	0.000228818	1.05518	0.996687
1417765_a_at	1422678_at	0.000228851	1.15966	0.996686
1421546_a_at	1455972_x_at	0.000228971	-0.942535	-0.996685
1421354_at	1422179_at	0.000229056	1.16841	0.996685
1419555_at	1450995_at	0.000229065	0.873213	0.996684
1419057_at	1422824_s_at	0.000229107	-1.38273	-0.996684
1423092_at	1451128_s_at	0.000229193	0.963284	0.996683
1418951_at	1460202_at	0.000229304	1.49961	0.996682
1417541_at	1428357_at	0.000229373	-1.27863	-0.996681
1421374_a_at	1448919_at	0.000229406	0.75543	0.996681
1448952_at	1460042_at	0.000229489	0.893219	0.99668
1448949_at	1451371_at	0.000229504	0.811942	0.99668
1424128_x_at	1455834_x_at	0.000229691	1.0963	0.996678
1418706_at	1451241_at	0.000229733	-0.944951	-0.996678
1418412_at	1424509_at	0.000229975	1.04031	0.996676
1424985_a_at	1426340_at	0.000230038	-1.22287	-0.996675
1423700_at	1453683_a_at	0.000230043	0.885344	0.996675
1425625_at	1437803_at	0.000230098	1.43812	0.996674
1418194_at	1422537_a_at	0.000230491	0.764577	0.996671
1424629_at	1438852_x_at	0.000230563	0.896696	0.99667
1438251_x_at	1449203_at	0.000230861	-1.89749	-0.996667
1451417_at	1455791_at	0.000230887	1.04367	0.996667
1423911_at	1460693_a_at	0.000231242	-1.5671	-0.996663
1417236_at	1424072_at	0.000231276	0.945754	0.996663
1415904_at	1431056_a_at	0.000231508	0.932603	0.996661
1424114_s_at	1450947_at	0.000231524	-0.763693	-0.996661
1423488_at	1460693_a_at	0.000231599	-1.88491	-0.99666
1417940_s_at	1422430_at	0.000231624	0.808379	0.99666
1425260_at	1452412_at	0.000231888	1.08087	0.996657
1417611_at	1451637_a_at	0.000232137	0.950646	0.996655
1423026_at	1437803_at	0.000232606	1.85175	0.99665
1416808_at	1418190_at	0.000232712	1.42179	0.996649
1417009_at	1450658_at	0.000232791	1.21128	0.996649
1416629_at	1456569_x_at	0.000232847	1.44884	0.996648
1422170_at	1460329_at	0.000232853	0.545171	0.996648
1427707_a_at	1452315_at	0.000232944	1.12165	0.996647
1432538_a_at	1453683_a_at	0.000232947	0.910832	0.996647
1416992_at	1449038_at	0.000233091	0.738209	0.996646
1418765_at	1425581_s_at	0.000233103	1.45109	0.996646
1419555_at	1450923_at	0.000233125	1.88045	0.996645
1419570_at	1425733_a_at	0.000233253	-1.74972	-0.996644
1416630_at	1425400_a_at	0.000233398	-0.89657	-0.996643
1416652_at	1432392_at	0.000233701	-0.935327	-0.99664
1422016_a_at	1423809_at	0.000234236	0.77916	0.996635
1416432_at	1417863_at	0.000235057	-2.39935	-0.996627
1424470_a_at	1428074_at	0.000235433	0.803952	0.996623
1422140_at	1435792_at	0.000235453	0.864961	0.996623
1417788_at	1419301_at	0.000235571	1.73378	0.996622
1419475_a_at	1424030_at	0.00023561	1.31915	0.996622
1416997_a_at	1425184_at	0.000235656	0.936506	0.996621
1420243_at	1420244_at	0.000236313	1.03285	0.996615
1427161_at	1452242_at	0.000236361	0.967983	0.996614
1449244_at	1455802_x_at	0.000236473	-1.4575	-0.996613
1418736_at	1427355_at	0.000236508	0.974495	0.996613
1417019_a_at	1418026_at	0.000236661	1.05432	0.996611
1416992_at	1427345_a_at	0.000236689	0.66021	0.996611
1417130_s_at	1420688_a_at	0.000236718	1.30073	0.996611
1416072_at	1418788_at	0.0002368	1.24981	0.99661
1424677_at	1438571_at	0.000236841	-1.04771	-0.99661
1424502_at	1425792_a_at	0.000236915	0.668374	0.996609
1448696_at	1452954_at	0.000237045	-1.2368	-0.996608
1425184_at	1450886_at	0.000237056	0.839464	0.996608
1418648_at	1421429_a_at	0.000237056	1.35026	0.996608
1417429_at	1417680_at	0.000237403	1.65683	0.996604
1425917_at	1432392_at	0.000237487	-0.707101	-0.996604
1426301_at	1449334_at	0.000237555	1.13756	0.996603
1421429_a_at	1424581_at	0.000237579	0.750593	0.996603
1416749_at	1421424_a_at	0.000237635	-1.20182	-0.996602
1424471_at	1428074_at	0.000237698	0.797927	0.996602
1424127_at	1426210_x_at	0.00023797	-1.63705	-0.996599
1424471_at	1438850_at	0.000238177	-0.612203	-0.996597
1418876_at	1425798_a_at	0.000238315	0.753105	0.996596
1417958_at	1453505_a_at	0.000238411	1.56298	0.996595
1427345_a_at	1460693_a_at	0.000238512	-1.79367	-0.996594
1427278_at	1431382_a_at	0.000238664	1.09744	0.996592
1417625_s_at	1451498_at	0.000238889	-1.50862	-0.99659
1415994_at	1424007_at	0.000239179	2.011	0.996587
1419089_at	1426551_at	0.000239203	-0.731806	-0.996587
1417394_at	1449334_at	0.000239205	1.78075	0.996587
1425000_s_at	1438571_at	0.000239326	0.971935	0.996586
1426153_a_at	1449948_at	0.000239712	1.29611	0.996582
1419373_at	1450922_a_at	0.000240088	1.5595	0.996579
1417788_at	1435943_at	0.000240115	1.86906	0.996579
1423093_at	1428357_at	0.000240152	-1.04217	-0.996578
1448301_s_at	1448823_at	0.000240307	0.684901	0.996577
1451278_a_at	1460388_at	0.000240356	0.893492	0.996576
1420683_at	1424464_s_at	0.000240469	1.5153	0.996575
1425606_at	1426914_at	0.000240584	1.43496	0.996574
1425212_a_at	1448147_at	0.000240664	0.946855	0.996573
1418369_at	1448145_at	0.000240766	0.99759	0.996572
1418697_at	1424008_a_at	0.000240884	1.34178	0.996571
1420673_a_at	1449219_at	0.000240927	-1.55912	-0.996571
1425290_at	1425733_a_at	0.000240964	-0.739067	-0.996571
1434319_at	1455791_at	0.000241119	-0.795017	-0.996569
1423877_at	1427161_at	0.000241264	0.92526	0.996568
1417323_at	1425416_s_at	0.000241398	1.0954	0.996566
1421546_a_at	1422016_a_at	0.000241431	1.3732	0.996566
1437313_x_at	1452534_a_at	0.000241481	1.063	0.996566
1450692_at	1451775_s_at	0.000241583	1.88883	0.996565
1417569_at	1424649_a_at	0.000241768	0.756608	0.996563
1417541_at	1423809_at	0.000241861	0.94891	0.996562
1418369_at	1448878_at	0.000242193	1.16745	0.996559
1419076_a_at	1448650_a_at	0.000242528	0.982997	0.996556
1416933_at	1427213_at	0.000242539	1.12751	0.996556
1423911_at	1450974_at	0.000242804	1.52743	0.996553
1425104_at	1427355_at	0.000243019	-1.54532	-0.996551
1419379_x_at	1449321_x_at	0.000243063	1.83583	0.996551
1417429_at	1418496_at	0.000243743	0.684952	0.996544
1425279_at	1437803_at	0.000244205	2.04593	0.99654
1421173_at	1448919_at	0.00024421	0.566763	0.99654
1418184_at	1421596_s_at	0.000244614	-1.89184	-0.996536
1448919_at	1450974_at	0.000245092	1.50732	0.996531
1417164_at	1421058_at	0.000245393	2.10696	0.996529
1437968_at	1448573_a_at	0.000245509	0.494241	0.996528
1418074_at	1419064_a_at	0.000245885	1.21972	0.996524
1418919_at	1432538_a_at	0.00024617	1.014	0.996521
1451128_s_at	1451246_s_at	0.000246439	0.847671	0.996519
1433685_a_at	1451456_at	0.000246505	0.953921	0.996518
1422398_at	1422663_at	0.000246586	0.769823	0.996517
1418480_at	1427247_at	0.000246819	-0.536545	-0.996515
1424186_at	1424187_at	0.000246864	0.963547	0.996515
1418919_at	1427161_at	0.000246877	0.889717	0.996515
1448251_at	1449145_a_at	0.000246965	0.66413	0.996514
1425784_a_at	1452919_a_at	0.000246974	-0.719295	-0.996514
1417858_at	1426236_a_at	0.000246998	-0.998958	-0.996513
1418876_at	1419717_at	0.000247029	1.3475	0.996513
1418363_at	1450995_at	0.000247323	1.16761	0.99651
1417939_at	1422513_at	0.000247377	1.01006	0.99651
1416318_at	1452260_at	0.000247609	0.368829	0.996508
1418601_at	1429457_at	0.000247734	-1.9776	-0.996507
1428983_at	1438453_at	0.000247983	0.672516	0.996504
1448251_at	1449396_at	0.00024803	0.655964	0.996504
1418199_at	1426560_a_at	0.000248034	0.242756	0.996504
1418195_at	1421424_a_at	0.000248119	0.700678	0.996503
1420722_at	1452349_x_at	0.000248135	0.392415	0.996503
1419073_at	1426225_at	0.000248717	0.408338	0.996497
1423774_a_at	1449207_a_at	0.000249073	0.815234	0.996494
1422552_at	1427082_at	0.000249376	0.545499	0.996491
1417323_at	1448251_at	0.000249654	-1.1855	-0.996489
1418601_at	1424233_at	0.000249977	1.80372	0.996486
1417074_at	1451498_at	0.000250016	2.02425	0.996485
1439012_a_at	1449176_a_at	0.000250546	1.03934	0.99648
1448982_at	1460184_at	0.000250621	-0.890616	-0.996479
1425000_s_at	1448696_at	0.000250665	-0.543717	-0.996479
1425104_at	1452004_at	0.000250666	-1.53087	-0.996479
1415905_at	1439036_a_at	0.000250888	0.64493	0.996477
1434748_at	1460184_at	0.000251088	-0.85855	-0.996475
1417858_at	1451375_at	0.000251157	0.714368	0.996474
1416803_at	1418601_at	0.000251494	0.590305	0.996471
1426914_at	1453317_a_at	0.000251846	0.933154	0.996468
1418815_at	1449244_at	0.000252171	0.968495	0.996465
1424187_at	1425104_at	0.000252285	-1.28487	-0.996464
1425108_a_at	1425109_at	0.000252632	1.10207	0.996461
1417346_at	1420655_at	0.000252695	-1.0716	-0.99646
1424401_at	1425260_at	0.00025367	0.908161	0.996451
1416757_at	1428357_at	0.000253855	-0.926215	-0.996449
1416251_at	1420029_at	0.000254119	1.09633	0.996447
1422677_at	1426225_at	0.000254135	0.696091	0.996447
1418496_at	1449145_a_at	0.000254216	0.69359	0.996446
1417273_at	1428788_at	0.000254323	-1.50931	-0.996445
1417347_at	1427213_at	0.000254405	-1.40731	-0.996444
1422970_at	1448777_at	0.000254775	0.6783	0.996441
1420655_at	1437644_at	0.00025494	2.5644	0.996439
1434319_at	1451417_at	0.000254963	-0.759112	-0.996439
1416978_at	1449416_at	0.000255739	1.1682	0.996432
1419570_at	1435792_at	0.000255786	1.56708	0.996431
1421766_at	1448251_at	0.000255835	-0.320285	-0.996431
1435758_at	1460329_at	0.00025592	1.00371	0.99643
1417765_a_at	1451371_at	0.000255953	1.10453	0.99643
1421424_a_at	1455796_x_at	0.000255968	-1.85109	-0.99643
1419555_at	1423305_at	0.000256045	1.73852	0.996429
1415802_at	1427749_at	0.000256198	-0.818859	-0.996427
1424463_at	1426243_at	0.000256246	-1.50156	-0.996427
1417872_at	1419663_at	0.000256341	0.752109	0.996426
1419504_at	1427183_at	0.000256606	0.56161	0.996424
1416808_at	1421328_at	0.000256891	-1.86558	-0.996421
1417940_s_at	1450886_at	0.000256971	0.988947	0.99642
1416978_at	1417680_at	0.00025711	1.76606	0.996419
1423093_at	1438852_x_at	0.000257331	0.74256	0.996417
1419270_a_at	1428357_at	0.000257525	-0.826717	-0.996415
1421058_at	1425144_at	0.000257986	-0.486544	-0.996411
1417911_at	1424128_x_at	0.000258463	1.02371	0.996406
1424030_at	1436991_x_at	0.000258558	-0.795979	-0.996406
1418877_at	1437103_at	0.000258585	0.624733	0.996405
1416808_at	1416978_at	0.000258695	1.29443	0.996404
1416072_at	1448529_at	0.000258737	0.745339	0.996404
1417015_at	1460372_at	0.000259083	0.713495	0.996401
1417019_a_at	1418919_at	0.000259545	1.00583	0.996396
1416432_at	1439018_at	0.000260025	-1.22121	-0.996392
1421596_s_at	1448145_at	0.000260155	-0.511167	-0.996391
1423093_at	1438843_x_at	0.000260221	-1.00754	-0.99639
1417178_at	1418979_at	0.000260314	0.841846	0.996389
1422170_at	1425918_at	0.000260906	0.526427	0.996384
1431805_a_at	1455802_x_at	0.000260911	2.60833	0.996384
1416749_at	1426662_at	0.000261129	-1.3039	-0.996382
1417133_at	1448136_at	0.000261196	0.686544	0.996381
1423775_s_at	1453683_a_at	0.000261207	0.872834	0.996381
1417618_at	1438082_at	0.000261266	0.595916	0.99638
1420514_at	1434736_at	0.000261346	1.04349	0.99638
1416134_at	1417795_at	0.000261426	0.480963	0.996379
1426937_at	1452136_at	0.000261537	-0.558972	-0.996378
1420032_at	1424278_a_at	0.000261684	0.346307	0.996377
1418496_at	1421766_at	0.000262212	-3.23751	-0.996372
1425586_a_at	1436565_at	0.000262216	0.585018	0.996372
1421174_at	1431056_a_at	0.000262425	0.355024	0.99637
1425837_a_at	1426571_at	0.000262772	-0.85355	-0.996367
1425826_a_at	1451527_at	0.000262944	0.905732	0.996365
1418317_at	1421021_at	0.000262976	2.10208	0.996365
1426110_a_at	1426153_a_at	0.000263426	-0.663711	-0.996361
1419549_at	1424030_at	0.000263452	1.07482	0.99636
1417926_at	1423675_at	0.000264081	1.27334	0.996354
1418788_at	1422587_at	0.000264251	1.20537	0.996353
1417092_at	1430127_a_at	0.000264386	0.596073	0.996352
1419153_at	1419397_at	0.000264398	1.25963	0.996352
1421256_at	1431554_a_at	0.000264411	0.809017	0.996351
1423714_at	1449207_a_at	0.000264519	0.843056	0.99635
1449490_at	1451646_at	0.000264558	0.931445	0.99635
1415811_at	1416118_at	0.000264659	1.05305	0.996349
1419435_at	1428104_at	0.000264878	-1.37906	-0.996347
1417541_at	1419270_a_at	0.000265138	1.54057	0.996345
1420011_s_at	1455531_at	0.000265245	0.80468	0.996344
1417686_at	1417788_at	0.000265279	0.658202	0.996343
1426155_a_at	1449984_at	0.000265363	0.64728	0.996343
1417645_at	1449458_at	0.000265432	-0.510143	-0.996342
1420712_a_at	1449319_at	0.000265824	-0.904978	-0.996338
1419088_at	1420011_s_at	0.000265949	-0.775605	-0.996337
1418835_at	1452244_at	0.000266188	-1.53029	-0.996335
1417686_at	1419301_at	0.000266245	1.14504	0.996335
1416306_at	1416803_at	0.000266372	0.684857	0.996333
1420031_at	1431274_a_at	0.000266518	-0.62924	-0.996332
1419495_at	1425215_at	0.00026655	1.44081	0.996332
1423084_at	1425826_a_at	0.000266687	0.382844	0.996331
1418835_at	1452136_at	0.000266761	1.00228	0.99633
1416757_at	1423809_at	0.00026679	0.687372	0.99633
1448878_at	1451246_s_at	0.000266959	0.730447	0.996328
1418026_at	1419152_at	0.00026699	0.813772	0.996328
1418648_at	1450082_s_at	0.000267161	1.50924	0.996326
1417552_at	1448627_s_at	0.000267739	-0.515134	-0.996321
1424463_at	1424464_s_at	0.000268053	1.1014	0.996318
1416558_at	1418281_at	0.000268113	1.35294	0.996317
1416617_at	1417884_at	0.000268292	1.85269	0.996316
1449334_at	1449335_at	0.000268463	0.927614	0.996314
1426005_at	1449219_at	0.000268504	-0.494981	-0.996314
1417394_at	1419089_at	0.000268597	1.75209	0.996313
1422561_at	1426340_at	0.000268671	0.878653	0.996312
1448254_at	1450947_at	0.000268982	-0.832292	-0.996309
1421404_at	1424187_at	0.000269072	0.95059	0.996309
1422537_a_at	1426243_at	0.000269334	-1.89771	-0.996306
1449061_a_at	1455834_x_at	0.00026938	0.986767	0.996306
1416997_a_at	1437175_at	0.00026958	0.769102	0.996304
1418569_at	1424509_at	0.000269708	1.0255	0.996303
1449319_at	1453596_at	0.000269802	-0.784896	-0.996302
1426231_at	1455431_at	0.000269888	-0.351076	-0.996301
1417232_at	1425032_at	0.00027013	0.415389	0.996299
1422587_at	1448529_at	0.000270141	0.491225	0.996299
1424046_at	1449104_at	0.000270366	-1.12898	-0.996297
1416803_at	1417244_a_at	0.000270719	-0.935275	-0.996294
1418190_at	1418736_at	0.000270805	1.26918	0.996293
1417514_at	1420186_at	0.000270828	0.996038	0.996293
1436737_a_at	1437644_at	0.000270907	3.06204	0.996292
1418243_at	1423489_at	0.000271094	0.599743	0.99629
1418026_at	1451884_a_at	0.000271435	0.982963	0.996287
1422140_at	1426231_at	0.000271452	-1.95654	-0.996287
1449705_x_at	1451417_at	0.000271555	1.01513	0.996286
1417644_at	1436021_at	0.000271619	-0.685788	-0.996285
1416194_at	1423352_at	0.000271645	1.33049	0.996285
1422607_at	1437968_at	0.000272025	2.33692	0.996282
1425416_s_at	1448250_at	0.000272051	-1.07495	-0.996281
1417639_at	1423866_at	0.000272091	2.15493	0.996281
1450993_at	1455990_at	0.000272185	1.00408	0.99628
1417680_at	1438082_at	0.000272352	0.481884	0.996279
1423092_at	1423093_at	0.000272501	1.03324	0.996277
1419663_at	1451698_at	0.000273149	-1.00172	-0.996271
1420718_at	1436879_x_at	0.000273171	1.2622	0.996271
1419674_a_at	1424186_at	0.000273288	0.553946	0.99627
1416411_at	1424046_at	0.000273348	-1.11236	-0.99627
1416854_at	1455531_at	0.000273732	0.652638	0.996266
1417910_at	1423774_a_at	0.00027382	1.28338	0.996265
1418979_at	1449416_at	0.000273888	1.45092	0.996265
1417611_at	1425737_at	0.000273956	0.625924	0.996264
1416251_at	1437806_x_at	0.000274217	-1.43482	-0.996262
1418281_at	1432392_at	0.00027441	1.34421	0.99626
1417741_at	1424008_a_at	0.000274614	1.69733	0.996258
1415904_at	1419486_at	0.000274654	-1.04456	-0.996258
1419124_at	1422537_a_at	0.000275061	0.741656	0.996254
1424233_at	1437012_x_at	0.000275302	0.928528	0.996252
1438953_at	1448919_at	0.000275401	0.741605	0.996251
1418412_at	1424581_at	0.000275433	1.06085	0.996251
1427345_a_at	1448995_at	0.000275488	1.67967	0.99625
1420655_at	1451527_at	0.000275522	0.783109	0.99625
1424046_at	1438571_at	0.000275612	1.15481	0.996249
1417686_at	1450974_at	0.000275842	1.31472	0.996247
1432538_a_at	1451358_a_at	0.000275971	0.85821	0.996246
1437644_at	1451375_at	0.000276147	-0.265016	-0.996244
1417863_at	1453317_a_at	0.000276257	0.474909	0.996243
1421051_s_at	1451650_at	0.000276595	0.858556	0.99624
1417323_at	1456676_a_at	0.000276643	-1.21142	-0.99624
1415811_at	1448654_at	0.00027668	-1.32884	-0.996239
1416630_at	1452244_at	0.000276806	1.17169	0.996238
1417074_at	1452251_at	0.000276904	1.77623	0.996237
1416431_at	1418602_at	0.000276941	1.58549	0.996237
1417757_at	1450922_a_at	0.000277045	1.04983	0.996236
1417942_at	1436756_x_at	0.000277223	-0.844349	-0.996234
1426653_at	1427698_at	0.00027739	0.980338	0.996233
1421354_at	1435162_at	0.000277482	0.927501	0.996232
1416527_at	1417346_at	0.000277688	-0.760068	-0.99623
1416318_at	1417686_at	0.000277708	0.593792	0.99623
1423700_at	1460746_at	0.000277766	0.857715	0.99623
1416194_at	1437012_x_at	0.000278162	1.05669	0.996226
1423774_a_at	1451246_s_at	0.000278333	0.828171	0.996224
1428074_at	1449948_at	0.000278609	-1.30579	-0.996222
1451371_at	1460693_a_at	0.000278716	-2.04386	-0.996221
1423858_a_at	1456629_at	0.000278889	0.837435	0.996219
1425145_at	1427277_at	0.000278892	0.952186	0.996219
1416992_at	1448995_at	0.000279041	1.11267	0.996218
1418113_at	1420370_s_at	0.000279096	0.264907	0.996218
1425586_a_at	1450684_at	0.00027912	0.473141	0.996217
1415850_at	1435176_a_at	0.000279137	-0.764651	-0.996217
1418397_at	1419089_at	0.000279255	1.08717	0.996216
1425216_at	1451322_at	0.000279943	0.600341	0.99621
1423775_s_at	1423877_at	0.000279987	0.902443	0.996209
1416933_at	1420664_s_at	0.000280315	0.777431	0.996207
1422970_at	1438852_x_at	0.000280352	0.64341	0.996206
1422970_at	1423714_at	0.000280705	0.796	0.996203
1418109_at	1421704_a_at	0.000280991	1.82765	0.9962
1416992_at	1460693_a_at	0.000281106	-1.18776	-0.996199
1418649_at	1449265_at	0.000281143	1.18178	0.996199
1418199_at	1460329_at	0.000281285	0.222508	0.996198
1438953_at	1449104_at	0.000281325	0.985309	0.996197
1422944_a_at	1427707_a_at	0.000281424	1.09186	0.996197
1423809_at	1448878_at	0.000281463	1.38776	0.996196
1416251_at	1422970_at	0.000281748	1.45727	0.996194
1418496_at	1422293_a_at	0.000281864	-1.07717	-0.996193
1421424_a_at	1438251_x_at	0.000282135	-0.844506	-0.99619
1425369_a_at	1426218_at	0.000282148	-1.94241	-0.99619
1416411_at	1452474_a_at	0.000282285	0.794025	0.996189
1416432_at	1448250_at	0.000282949	1.13264	0.996183
1419561_at	1422371_at	0.000282962	1.05115	0.996183
1416639_at	1424815_at	0.000283016	0.721494	0.996182
1416306_at	1437932_a_at	0.000283021	-0.425788	-0.996182
1416134_at	1449403_at	0.000283188	0.701103	0.996181
1418243_at	1451371_at	0.000283351	0.541835	0.996179
1416854_at	1419088_at	0.000283547	-1.03797	-0.996177
1420688_a_at	1449081_at	0.000283746	0.622651	0.996176
1416158_at	1416160_at	0.000283759	1.0273	0.996175
1419674_a_at	1448839_at	0.000284465	0.987058	0.996169
1418480_at	1452161_at	0.000284877	0.415107	0.996165
1422587_at	1426914_at	0.000284917	-0.546632	-0.996165
1426300_at	1426301_at	0.000285092	0.890332	0.996164
1424524_at	1456569_x_at	0.000285208	1.18731	0.996162
1417244_a_at	1429457_at	0.0002856	1.24752	0.996159
1415802_at	1418569_at	0.00028568	-0.758752	-0.996158
1430811_a_at	1436756_x_at	0.000285741	-0.759825	-0.996158
1422059_at	1423674_at	0.00028622	0.817024	0.996153
1421134_at	1450240_a_at	0.000286338	-1.86135	-0.996152
1423714_at	1448777_at	0.000286552	0.848654	0.99615
1416933_at	1417346_at	0.000286635	-0.767301	-0.99615
1418762_at	1436182_at	0.000286703	0.849007	0.996149
1423614_at	1426978_at	0.000286918	0.831812	0.996147
1418264_at	1429270_a_at	0.000286965	0.959088	0.996147
1423911_at	1438953_at	0.000287304	1.35601	0.996144
1427161_at	1448145_at	0.000287377	1.18383	0.996143
1433515_s_at	1436880_at	0.000287417	-1.77501	-0.996143
1424677_at	1434851_s_at	0.000287718	-0.84126	-0.99614
1416997_a_at	1435950_at	0.000287796	0.87524	0.996139
1421374_a_at	1423911_at	0.000288081	0.745094	0.996137
1426235_a_at	1426236_a_at	0.000288263	0.947745	0.996135
1417164_at	1418835_at	0.000288559	-0.57309	-0.996132
1425626_at	1448330_at	0.000288606	0.871793	0.996132
1416321_s_at	1451241_at	0.000288726	1.0845	0.996131
1417358_s_at	1427213_at	0.000288731	1.25577	0.996131
1423890_x_at	1451152_a_at	0.000288844	0.982312	0.99613
1419088_at	1449335_at	0.000289198	0.964599	0.996127
1432179_x_at	1449863_a_at	0.000289484	1.16577	0.996124
1418026_at	1427161_at	0.000289549	0.848645	0.996124
1419270_a_at	1460184_at	0.000289608	-0.544924	-0.996123
1418252_at	1420534_at	0.000289725	-1.18304	-0.996122
1418815_at	1422552_at	0.000289977	-1.2236	-0.99612
1417073_a_at	1460416_s_at	0.000290468	-0.967986	-0.996115
1437611_x_at	1448226_at	0.000290645	0.730538	0.996114
1424099_at	1454613_at	0.00029086	1.47494	0.996112
1422944_a_at	1449490_at	0.000290867	1.28918	0.996112
1417347_at	1437644_at	0.000291208	-2.65077	-0.996109
1416310_at	1419513_a_at	0.000291215	0.842656	0.996109
1418363_at	1455802_x_at	0.000291279	5.45537	0.996108
1418304_at	1425290_at	0.000291428	2.81084	0.996107
1419513_a_at	1423775_s_at	0.000291525	1.30643	0.996106
1424471_at	1438851_x_at	0.000291749	-0.603741	-0.996104
1417163_at	1419089_at	0.000291953	0.64498	0.996102
1416854_at	1436021_at	0.000292008	0.627271	0.996102
1425109_at	1450673_at	0.000292143	0.797719	0.9961
1416757_at	1419270_a_at	0.000292144	1.11595	0.9961
1419057_at	1425733_a_at	0.000292439	-1.37804	-0.996098
1421766_at	1448839_at	0.000292514	-0.527463	-0.996097
1422587_at	1448839_at	0.000292679	0.838026	0.996096
1419124_at	1453596_at	0.000292949	0.789172	0.996093
1449145_a_at	1449396_at	0.000293004	0.983854	0.996093
1419152_at	1460746_at	0.000293102	1.04886	0.996092
1420764_at	1423420_at	0.000293155	1.66589	0.996091
1449335_at	1450716_at	0.000293216	1.09046	0.996091
1417933_at	1435943_at	0.000293235	1.43906	0.996091
1416809_at	1450296_at	0.000293325	0.60811	0.99609
1417445_at	1448899_s_at	0.000293334	1.08215	0.99609
1448982_at	1451358_a_at	0.000293391	0.985523	0.996089
1424509_at	1451528_at	0.000293851	1.40702	0.996085
1418243_at	1418697_at	0.000294059	0.675907	0.996083
1417863_at	1425606_at	0.000294139	0.352144	0.996083
1417938_at	1417939_at	0.000294195	1.09062	0.996082
1437012_x_at	1437946_x_at	0.000294231	1.07461	0.996082
[truncated: 74,944 more rows]

## Sheet: Common Metabolite Hubs
Common Metabolite Hubs of Met-Met and Met-Gene Networks
Common Metabolite Hubs	Sub-Pathway	Super-Pathway
Glutamate	Glutamate Metabolism	Amino Acid
Glycine	Glycine, Serine and Threonine Metabolism
Isoleucine	Leucine, Isoleucine and Valine Metabolism
Methionine	Methionine, Cysteine, SAM and Taurine Metabolism
N-Acetylmethionine
Phenylacetylglycine	Phenylalanine and Tyrosine Metabolism
Phenylalanine
Tyrosine
Tryptophan	Tryptophan Metabolism
Ornithine	Urea cycle; Arginine and ProlineMetabolism
Urea
Erythronate*	AminosugarMetabolism	Carbohydrate
Fructose	Fructose, Mannose and Galactose Metabolism
Mannitol
Ribitol	Pentose Metabolism
Adenosine 5’-diphosphoribose	Nicotinate and Nicotinamide Metabolism	Cofactors and Vitamins
Nicotinamide
Phosphate	Oxidative Phosphorylation	Energy
Inositol 1-phosphate (I1P)	Inositol Metabolism	Lipid
1-Arachidonoylglycerophosphocholine (20:4n6)*	Lysolipid
1-Arachidonoylglycerophosphoinositol*
1-Palmitoylplasmenylethanolamine*
1-Stearoylglycerophosphoinositol
2-Palmitoylglycerophosphoethanolamine*
Pelargonate(9:0)	Medium Chain Fatty Acid
1-Stearoylglycerol (1-monostearin)	Monoacylglycerol
Glycerophosphorylcholine(GPC)	Phospholipid Metabolism
Palmitoylsphingomyelin	Sphingolipid Metabolism
Campesterol	Sterol
Cholestanol
Cholesterol
Methylphosphate	Purine and Pyrimidine Metabolism	Nucleotide
Gamma-glutamylglutamate	Gamma-glutamylAmino Acid	Peptide
Ac-Ser-Asp-Lys-Pro-OH	Polypeptide
Glycerol 2-phosphate	Chemical	Xenobiotics

[truncated: 1 more sheets: Common Gene Hubs]
