# Supplementary material for: Aquaporin-7 Regulates the Response to Cellular Stress in Breast Cancer
Source: Oxford University Press journal article supplement (doi:10.1158/0008-5472.can-19-2269), 2020-07-06
Supplement: 00085472can192269-sup-226053_3_supp_6368765_qc54kj.xlsx [file 00085472can192269-sup-226053_3_supp_6368765_qc54kj.xlsx]

## Sheet: Explanation
	OrigScale		Values are normalized in terms of raw area counts.
			For a single day run, this is equivalent to the raw data.
	ScaledImpData		Each biochemical in OrigScale is rescaled to set the median equal to 1.
			Then, missing values are imputed with the minimum.
	ProNormImpData		Values for each sample are normalized by BRADFORD protein concentration.
			Each biochemical in OrigScale is then rescaled to set the median equal to 1.
			Lastly, missing values are imputed with the minimum.
	Pathway Heat Map		This is the heat map associated with the statistical analysis of the data.
			Indicates ratios, p- and q-values for each comparison.
			0.55	Green: indicates significant difference (p≤0.05) between the groups shown, metabolite ratio of < 1.00
			0.76	Light Green: narrowly missed statistical cutoff for significance 0.05<p<0.10, metabolite ratio of < 1.00
			1.71	Red: indicates significant difference (p≤0.05) between the groups shown; metabolite ratio of ≥ 1.00
			1.32	Light Red: narrowly missed statistical cutoff for significance 0.05<p<0.10, metabolite ratio of ≥ 1.00
			1.2	Non-colored text and cell: mean values are not significantly different for that comparison
	Biochemical Name*		Indicates a compound that has not been confirmed based on a standard, but we are confident in its identity.
	Biochemical Name**		Indicates a compound for which a standard is not available, but we are reasonably confident in its identity or the information provided.
	Biochemical Name (#) or [#]		Indicates a compound that is a structural isomer of another compound in the Metabolon spectral library.
			For example, a steroid that may be sulfated at one of several positions that are indistinguishable by the mass spectrometry data or a diacylglycerol for which more than one stereospecific molecule exists.
	Box Plots (pathway)		Box plots sorted by pathway and biochemical name, as in the example below:
	Box Plots (biochem)

## Sheet: OrigScale (cells HD4)
													SAMPLE_NAME	UNDA-00048	UNDA-00049	UNDA-00050	UNDA-00051	UNDA-00052	UNDA-00053	UNDA-00054	UNDA-00055	UNDA-00056	UNDA-00057	UNDA-00058	UNDA-00059	UNDA-00060	UNDA-00061	UNDA-00062	UNDA-00063	UNDA-00064	UNDA-00065	UNDA-00066	UNDA-00067
													SAMPLE_ID	4917544	4917545	4917546	4917547	4917548	4917549	4917550	4917551	4917552	4917553	4917554	4917555	4917556	4917557	4917558	4917559	4917560	4917561	4917562	4917563
													CLIENT_IDENTIFIER	4T1_Ctrl_1	4T1_Ctrl_2	4T1_Ctrl_3	4T1_Ctrl_4	4T1_Ctrl_5	4T1_KD_1	4T1_KD_2	4T1_KD_3	4T1_KD_4	4T1_KD_5	EpH4_Ctrl_1	EpH4_Ctrl_2	EpH4_Ctrl_3	EpH4_Ctrl_4	EpH4_Ctrl_5	EpH4_KD_1	EpH4_KD_2	EpH4_KD_3	EpH4_KD_4	EpH4_KD_5
													BRADFORD_HD4	10.904	11.819	12.107	12.745	12.635	10.923	9.991	11.662	10.009	10.504	4.297	6.909	5.253	6.312	3.679	4.279	2.597	4.893	3.716	5.421
													CELL_COUNT_X10E6	16.6	13.2	15.2	14.6	16.5	12.6	10.8	12.6	10.7	11	10.1	10.6	13.1	11.6	11.3	12.9	14.8	14.3	14.1	14.9
													CELL_LINE	4T1	4T1	4T1	4T1	4T1	4T1	4T1	4T1	4T1	4T1	EpH4	EpH4	EpH4	EpH4	EpH4	EpH4	EpH4	EpH4	EpH4	EpH4
													GROUP_DESCRIPTION	4T1 Scrambled Ctrl	4T1 Scrambled Ctrl	4T1 Scrambled Ctrl	4T1 Scrambled Ctrl	4T1 Scrambled Ctrl	4T1 Aqp7 knockdown	4T1 Aqp7 knockdown	4T1 Aqp7 knockdown	4T1 Aqp7 knockdown	4T1 Aqp7 knockdown	EpH4 Scrambled Ctrl	EpH4 Scrambled Ctrl	EpH4 Scrambled Ctrl	EpH4 Scrambled Ctrl	EpH4 Scrambled Ctrl	EpH4 Aqp7 knockdown	EpH4 Aqp7 knockdown	EpH4 Aqp7 knockdown	EpH4 Aqp7 knockdown	EpH4 Aqp7 knockdown
													GROUP_NUMBER	1	1	1	1	1	2	2	2	2	2	3	3	3	3	3	4	4	4	4	4
													TREATMENT	Ctrl	Ctrl	Ctrl	Ctrl	Ctrl	Aqp7_KD	Aqp7_KD	Aqp7_KD	Aqp7_KD	Aqp7_KD	Ctrl	Ctrl	Ctrl	Ctrl	Ctrl	Aqp7_KD	Aqp7_KD	Aqp7_KD	Aqp7_KD	Aqp7_KD
PATHWAY_SORTORDER	BIOCHEMICAL	SUPER_PATHWAY	SUB_PATHWAY	COMP_ID	PLATFORM	CHEMICAL_ID	RI	MASS	CAS	PUBCHEM	CHEMSPIDER	KEGG	Group HMDB_ID	4T1_Ctrl	4T1_Ctrl	4T1_Ctrl	4T1_Ctrl	4T1_Ctrl	4T1_Aqp7_KD	4T1_Aqp7_KD	4T1_Aqp7_KD	4T1_Aqp7_KD	4T1_Aqp7_KD	EpH4_Ctrl	EpH4_Ctrl	EpH4_Ctrl	EpH4_Ctrl	EpH4_Ctrl	EpH4_Aqp7_KD	EpH4_Aqp7_KD	EpH4_Aqp7_KD	EpH4_Aqp7_KD	EpH4_Aqp7_KD
3568	(3'-5')-adenylyluridine	Nucleotide	Dinucleotide	52740	LC/MS Neg	100009060	2002	572.115	3051-84-1	112074	100483			115518	77002			96370		334539		341026	250669		60072	96895		78680	85176		68080	73777	88872
3573	(3'-5')-cytidylyluridine*	Nucleotide	Dinucleotide	62399	LC/MS Neg	100020728	1522	548.104						86132	96788			85319		311422		221686	190390		60816	97056		95032	53325	64283	106263	22164	84406
3577	(3'-5')-uridylylcytidine*	Nucleotide	Dinucleotide	62398	LC/MS Neg	100020729	1591	548.104						65507					89262	392511	57447	325360	271844			73813		107775		54025	57417		66455
3579	(3'-5')-uridylyluridine	Nucleotide	Dinucleotide	52741	LC/MS Neg	100009058	1688	549.088	2415-43-2	102258	92384			109429	104122			106775	56999	391659		279953	304523		56639	60488	67459	134665	60702		49583	31381
432	(N(1) + N(8))-acetylspermidine	Amino Acid	Polyamine Metabolism	57814	LC/MS Pos Early	100016038	3080	188.176						4253277	4946366	3312212	3112709	5341404	830241	980602	525584	967953	835697	419461	683516	672449	555063	508260	395760	301994	560165	323872	458304
297	1-carboxyethylisoleucine	Amino Acid	Leucine, Isoleucine and Valine Metabolism	62558	LC/MS Neg	100020427	2628	202.108						167540	157445	107918	248034	223497	206494	113348	162747	108866	131688
261	1-carboxyethylleucine	Amino Acid	Leucine, Isoleucine and Valine Metabolism	62559	LC/MS Neg	100020425	2663	202.108						49595	74533	40879	57314	130381	42109		85961	66195
120	1-carboxyethylphenylalanine	Amino Acid	Phenylalanine Metabolism	62566	LC/MS Neg	100020419	2844	236.093			19276386			49997	41431	47876	60298	79469	43960	52982
3442	1-methyladenine	Nucleotide	Purine Metabolism, Adenine containing	1527	LC/MS Pos Early	54	2133	150.077	5142-22-3	78821	71157	C02216	HMDB11599	4878124	1871191	13234169	12522276	2707105	496395		401550
66	1-methylhistidine	Amino Acid	Histidine Metabolism	30460	LC/MS Pos Early	100001051	2755	170.092	332-80-9	92105	83153	C01152	HMDB00001	1463906	1714463	1314097	1751324	3032597	1090596	754202	1653884	1116462	2124959
1581	13-HODE + 9-HODE	Lipid	Fatty Acid, Monohydroxy	37752	LC/MS Neg	100002196	5275	295.228		43013				8900035	3294159	10683739	17145104	3422523	6571159	2375455	6343564	4536416	1150403	2424767	2804777	3985480	1720532	2522654	7577368	7214028	10657135	10055983	6718955
3548	2'-deoxycytidine	Nucleotide	Pyrimidine Metabolism, Cytidine containing	15949	LC/MS Pos Early	100000125	2193	228.098	951-77-9	13711	13117	C00881	HMDB00014	11804292	27174504	11028352	11799346	24816596	2329911	6535848	3163619	2993412	6425389	12425225	16535618	11514560	15540633	11176466	6689231	11944041	20195052	3128125	10291784
3491	2'-deoxyguanosine	Nucleotide	Purine Metabolism, Guanine containing	1411	LC/MS Neg	348	1751	266.089	961-07-9	187790	163230	C00330	HMDB00085	1920833	5481304	1887632	2179166	4567307	261994	2356090	306080	775527	2820370	1938292	1725315	1161147	1473933	1704347	475746	2963249	3091586	292971	1720429
3423	2'-deoxyinosine	Nucleotide	Purine Metabolism, (Hypo)Xanthine/Inosine containing	15076	LC/MS Neg	100000135	1688	251.079	890-38-0	65058	58569	C05512	HMDB00071	2541893	7333315	2590824	3013946	6291534	412963	2917229	446161	856452	3050296	2470446	2817283	1640144	2513201	2038902	627409	3065701	3661941	293851	2006995
3524	2'-deoxyuridine	Nucleotide	Pyrimidine Metabolism, Uracil containing	52602	LC/MS Neg	536	1586	227.067	951-78-0	13712	13118	C00526	HMDB00012	721185	1432289	965814	1064243	1730224	79370	178841	135403	66689	179430	498705	912574	739461	701158	418135	386593	212479	551594	181807	358366
3549	2'-O-methylcytidine	Nucleotide	Pyrimidine Metabolism, Cytidine containing	57554	LC/MS Pos Early	100010895	2411	258.108	2140-72-9	150971	133067			2148975	882948	5997729	5364455	1393414	3394897	420036	3893193	357871	161079	85955	305782	430936	338347	267303	301388		286732	306597	278031
1334	2-hydroxyglutarate	Lipid	Fatty Acid, Dicarboxylate	37253	LC/MS Polar	100002070	3352.8	147.03	40951-21-1	43	42	C02630	HMDB00606	17646240	20381322	26624548	30597178	27890964	2157776	2081460	1953025	1547388	1690146	1632155	2659689	1455898	1946144	1148753	482581	774913	1026915	332768	808718
1548	2-hydroxypalmitate	Lipid	Fatty Acid, Monohydroxy	35675	LC/MS Neg	100001579	5511.2	271.228	764-67-0	92836	83805		HMDB31057	3426141	3046159	3816740	5743772	3962073	2409943	2769579	3197220	2314199	1875232	4063758	5420245	5337967	4734831	4822921	3920549	3639179	5278781	3763808	4560440
1550	2-hydroxystearate	Lipid	Fatty Acid, Monohydroxy	17945	LC/MS Neg	1239	5695	299.259	629-22-1	69417	62625	C03045		1233433	1124333	1234280	2482934	1333303	798437	819222	1343069	551669	656812	1514976	2169775	2265762	1783924	2074414	1291192	956143	1237110	1050850	1311606
1164	2-methylcitrate/homocitrate	Energy	TCA Cycle	52282	LC/MS Neg	100008929	575	205.035						331005	387141	389444	456840	429265	274534	248375	321524	289159	260695			96306
375	2-oxoarginine*	Amino Acid	Urea cycle; Arginine and Proline Metabolism	55072	LC/MS Pos Early	100002784	1760	174.087	3715-10-04	558	542	C03771	HMDB04225	275623	187382	435031	259108	204573	428613	235341	522736	286696	166435						151676			72510	35492
962	2-phosphoglycerate	Carbohydrate	Glycolysis, Gluconeogenesis, and Pyruvate Metabolism	35629	LC/MS Polar	100000093	4346	184.986	70195-25-4	59	13766841	C00631	HMDB03391	7453295	7120539	13070791	9512445	6946472	10172404	17396126	12132944	17825444	18702392	7329065	14520239	14833722	8752891	5191561	17830256	13358353	21331360	16443558	28233520
3615	3'-dephosphocoenzyme A	Cofactors and Vitamins	Pantothenate and CoA Metabolism	18289	LC/MS Neg	100000138	2013	686.142	3633-59-8	444485	392407	C00882	HMDB01373	2449012	3454599	2168499	2042410	3093938	1157271	3634259	593653	1419227	3422397	1032773	2090546	823054	2987237	1305950	167034	288419	687310	166803	287286
147	3-(4-hydroxyphenyl)lactate	Amino Acid	Tyrosine Metabolism	32197	LC/MS Neg	240	1379	181.051	6482-98-0	9378	9010	C03672	HMDB00755	1180521	1443044	1572199	2078690	1761914	1380805	937917	1186521	861326	749923	457231	659279	599136	689116	382397	165824		241120	86228	214524
2573	3-hydroxy-3-methylglutarate	Lipid	Mevalonate Metabolism	531	LC/MS Polar	112	2850	161.046	503-49-1	1662	4573695	C03761	HMDB00355	10277864	11028552	13831042	15974050	14164479	7671321	7410379	7469079	5579577	5350379	3912010	5260075	4741201	5430744	3243292	1456974	1207101	1972803	1154944	1539738
1560	3-hydroxydecanoate	Lipid	Fatty Acid, Monohydroxy	22053	LC/MS Neg	100000997	4634.7	187.134	5561-87-5	26612	24790		HMDB02203	1021800	775728	820904	1076822	764751		231230	101805		98655			176001	110002	144383			152419		107094
1562	3-hydroxylaurate	Lipid	Fatty Acid, Monohydroxy	32457	LC/MS Neg	100001112	5175	215.165	53941-38-1	94216	85026		HMDB00387	3383986	2364251	3078697	5090062	2853409	762440	404654	300686	150892	233741		162328	198982	141931	238199			250208	161365	134398
1564	3-hydroxymyristate	Lipid	Fatty Acid, Monohydroxy	21158	LC/MS Neg	100000882	5335	243.197	3422-31-9	16064	15252			15387884	10855854	16060596	26968252	14938905	5072376	3433928	2582645	1248432	1456121	1037713	1447557	1359740	727998	912018	899673	902021	1643914	1153165	1388699
1596	3-hydroxystearate	Lipid	Fatty Acid, Monohydroxy	52938	LC/MS Neg	100008933	5674	299.259	45261-96-9	5282907	4446034			1143300	1271213	1178927	1272156	1558816	1062576	1512107	1407989	1274838	1386311	996839	1211453	1070265	964956	1437671	1383659	1821840	1795410	1303606	1580813
3540	3-methylcytidine	Nucleotide	Pyrimidine Metabolism, Cytidine containing	35132	LC/MS Pos Early	100001466	2176	258.108	21028-20-6	159649	9164190			1210801	434506	3128584	2952345	578285	907329	188234	810196	158238	63906
67	3-methylhistidine	Amino Acid	Histidine Metabolism	15677	LC/MS Pos Early	100000042	2670	170.092	368-16-1	64969	58494	C01152	HMDB00479	1809129	1474025	3656975	3082369	3341217	2604049	1576585	1454427	1198470	969154
963	3-phosphoglycerate	Carbohydrate	Glycolysis, Gluconeogenesis, and Pyruvate Metabolism	1414	LC/MS Neg	132	583	184.986	80731-10-8	724	10669764	C00597	HMDB00807	5239854	4184505	9117133	6809829	3836700	7975239	11324826	10366654	15829618	12597541	8371282	15161831	13691748	11768539	8809952	18787516	8903597	9150802	10316225	14835827
435	4-guanidinobutanoate	Amino Acid	Guanidino and Acetamido Metabolism	15681	LC/MS Pos Early	100000096	2320	146.092	463-003;463-00-3	500	486	C01035	HMDB03464	931420	804343	1122860	1513088	1267327	799735	715218	1114769	500343	693040	284241	367149	332186	327186	179339			137893	423191	120271
455	4-hydroxy-nonenal-glutathione	Amino Acid	Glutathione Metabolism	48487	LC/MS Neg	100006240	3319.2	462.192	99927-70-5					337735	517434	299860	358780	435991	153686	171852	86502	190795	181981	289766	313732	340633	307835	169147	237416	133557	397272	147918	241361
85	4-imidazoleacetate	Amino Acid	Histidine Metabolism	32349	LC/MS Pos Early	100001207	2055	127.05	645-65-8	96215	86856	C02835	HMDB02024	390305	125601	271861	255025	149004	300457	153439	366048	302122	193713		191056	186190	158833	111038	142512	46844	198030	101210	111079
3511	5,6-dihydrouridine	Nucleotide	Pyrimidine Metabolism, Uracil containing	61833	LC/MS Neg	100001425	1119	245.078	5627-05-04	94312	85115			2181394	2120108	2933894	3425329	2086276	774549	1119532	528751	450589	712080		161448	77917	223747	206753			61992
101	5-(galactosylhydroxy)-L-lysine	Amino Acid	Lysine Metabolism	43582	LC/MS Pos Early	100002462	2755	325.161	32448-36-5					2325034	2082433	2322883	2244854	2131348	2176482	1564958	1712607	1805075	1851163	297809	333926	423740	346719	355569	603454	540911	608194	637239	653119
3550	5-methyl-2'-deoxycytidine	Nucleotide	Pyrimidine Metabolism, Cytidine containing	38159	LC/MS Pos Early	100002300	2303	242.114	838-07-3	440055	389065	C03592	HMDB02224	360379	1478771	470066	509996	1170806		565509			631898	489201	508847	248814	516112	452773	105230	526206	997324		342416
3541	5-methylcytidine	Nucleotide	Pyrimidine Metabolism, Cytidine containing	22119	LC/MS Pos Early	100000763	2227	258.108	2140-61-6	92918	83877		HMDB00982	5062937	2439653	11584738	11190360	2848684	3729326	1173927	3615531	900274	635869			458276	226176	162881	418256		258725	170036	309315
425	5-methylthioadenosine (MTA)	Amino Acid	Polyamine Metabolism	1419	LC/MS Pos Early	212	2752	298.097	2457-80-9	439176	388321	C00170	HMDB01173	16447157	19913116	19027016	21582246	26827348	15386072	13324106	11155891	10770572	12327038	6662836	9010988	8897105	9724153	6090868	3707287	2881308	5203556	3019741	4248457
3513	5-methyluridine (ribothymidine)	Nucleotide	Pyrimidine Metabolism, Uracil containing	35136	LC/MS Neg	100001446	1778.1	257.078	1463-10-1	445408	393058		HMDB00884	368038	489168	1019996	1199026	658363	125531	84447	117410					63910
447	5-oxoproline	Amino Acid	Glutathione Metabolism	1494	LC/MS Neg	1021	738.5	128.035	98-79-3	7405	7127	C01879	HMDB00267	16032819	16630921	16264218	22613768	23312176	11229261	8093464	11124841	7392458	8201162	3558195	4480990	4018151	3935034	3190985	3544087	2960805	4954300	3036519	3909130
972	6-phosphogluconate	Carbohydrate	Pentose Phosphate Pathway	15442	LC/MS Neg	100000341	583.9	275.017	921-62-0;53411-70-4	91493	82615	C00345	HMDB01316	1785636	2459637	1105285	1300969	2918548	595030	972321	578051	844603	764001	1825863	5768557	3245615	4201263	1314271	767853	539021	974900	371689	1131551
2590	7-dehydrocholesterol	Lipid	Sterol	1099	LC/MS Pos Late	264	2467	367.336	434-16-2	439423	388534	C01164	HMDB00032	1986200	1880066	2415842	2207890	2188514	1102272	1241637	1252457	1268167	1343067	34813680	38486248	39886092	38185880	39463272	57229708	49452824	67894056	58463660	59363124
2632	7-hydroxycholesterol (alpha or beta)	Lipid	Sterol	47890	LC/MS Pos Late	100005999	1930	367.336		107722			HMDB06119	3968563	4155743	4668015	4334351	4441198	2195104	2241627	2583212	2316127	2344486	5641573	5881690	5983059	5920353	6089850	5739086	5242781	6975197	5954467	5686601
3477	7-methylguanine	Nucleotide	Purine Metabolism, Guanine containing	35114	LC/MS Pos Early	100001456	2175	166.072	578-76-7	11361	10883	C02242	HMDB00897	8697909	6176467	17051324	16878500	6866341	3235057	3069946	2863288	1708080	2481788	434725	1159364	890694	1221514	885121	582060	406640	1040183	398654	685553
1459	acetylcarnitine (C2)	Lipid	Fatty Acid Metabolism(Acyl Carnitine)	32198	LC/MS Pos Early	100000802	2282	204.123	5080-50-2	1	5406074	C02571	HMDB00201	2813794	2535804	2363390	3160492	4378009	4662862	3397197	4911998	3639293	5040614	2781141	3743140	2911365	3352737	2315758	815913	692600	1152729	740629	1156506
1166	acetylphosphate	Energy	Oxidative Phosphorylation	15488	LC/MS Polar	1211	4013.9	138.98	94249-01-1	186	181	C00227	HMDB01494	6541527	6307559	6276392	5993225	6440650	3757185	3405004	3969154	4962942	3211816	3806702	4397564	3419840	4178969	2385033	2770298	2236713	2285227	1668201	2247788
1145	aconitate [cis or trans]	Energy	TCA Cycle	46173	LC/MS Neg	100001359	580	173.009						436378	1907692	199780	228413	1197255	649903	1153198	343137	488379	1550361	8446707	5382279	4222703	5860555	7157948	4330028	6176941	6010759	4407016	4843386
3441	adenine	Nucleotide	Purine Metabolism, Adenine containing	554	LC/MS Pos Early	880	2221	136.062	73-24-5	190	185	C00147	HMDB00034	49795320	41529252	44814160	42336236	36683520	5471174	7348703	4988136	4585315	8931161	4178292	5164445	9626677	4677966	9898885	9084015	9982886	4092001	13446725	3688265
3440	adenosine	Nucleotide	Purine Metabolism, Adenine containing	555	LC/MS Pos Early	798	2169	268.104	58-61-7	60961	54923	C00212	HMDB00050	10935207	7734179	9625760	9154630	9266122	10045904	6351792	5912239	5936944	5586234	5004891	6558553	8009210	6929289	9890147	9102542	10501450	10412988	10486902	9417390
3435	adenosine 2'-monophosphate (2'-AMP)	Nucleotide	Purine Metabolism, Adenine containing	36815	LC/MS Neg	100001694	1497.7	346.056	130-49-4	94136		C00946	HMDB11617	384192	2975580	103258	260689	2987599	165631	6037059	119967	1653387	6836853	270521	174041		158996			2564194	2329506		1309741
3438	adenosine 3',5'-diphosphate	Nucleotide	Purine Metabolism, Adenine containing	15691	LC/MS Neg	1214	575	426.022	75431-54-8	159296	19951095	C00054	HMDB00061	200487	601014	92137	118426	520868	181401	282013	167284	217957	181394						21421		71792		87866
3434	adenosine 3'-monophosphate (3'-AMP)	Nucleotide	Purine Metabolism, Adenine containing	35142	LC/MS Neg	100001449	1245	346.056	84-21-9	41211	10463793	C01367	HMDB03540		338058			200072		6787273		1512659	8595873	1371223	470166	70759	599999	416497		8660741	5488085		2097229
3606	adenosine 5'-diphosphoribose (ADP-ribose)	Cofactors and Vitamins	Nicotinate and Nicotinamide Metabolism	558	LC/MS Neg	215	920	558.064	68414-18-6	192	3674071	C00301	HMDB01178	1112123	1304257	491552	488527	2017536	193808	1824731	68126	1852475	2352444	1271002	1532797	993254	1905361	1247763	177461	438853	714335		585683
3433	adenosine 5'-monophosphate (AMP)	Nucleotide	Purine Metabolism, Adenine containing	32342	LC/MS Pos Early	209	1013	348.07	149022-20-8	6083	10239183	C00020	HMDB00045	14103992	14101990	15972737	19075518	15783153	11574916	20767348	7215554	9702901	23030980	3543804	3039008	2358348	4474211	3622506	1747410	12377052	10092410	1714878	5158668
28	alanine	Amino Acid	Alanine and Aspartate Metabolism	1126	LC/MS Pos Early	811	1700	90.055	56-41-7	5950	5735	C00041	HMDB00161	175745520	181857936	166766064	179093952	197154288	185318432	201213824	231763152	238213824	188558928	82831576	99689568	96308752	100644968	95047072	162790800	72304728	131064176	125410240	146715600
490	alanylleucine	Peptide	Dipeptide	37093	LC/MS Pos Early	100001890	3055	203.139	1638-60-4	259583	227831		HMDB28691									133395	110702	4685850				272756	568464	28784284	17591330	1117491	1397700
3427	allantoin	Nucleotide	Purine Metabolism, (Hypo)Xanthine/Inosine containing	1107	LC/MS Polar	1002	1672	157.037	97-59-6	204	199	C02350	HMDB00462	1792634	1805225	2788653	3281856	2436191	1016343	857550	1106667	832556	759472	394310	836014	676400	517679	423910	360543	318856	618649	309133	454466
43	alpha-ketoglutaramate*	Amino Acid	Glutamate Metabolism	62101	LC/MS Polar	100002397	1916	144.03	18465-19-5					289143	324767	309200	392221	413255	133660	237410	211598	219374	226592		171465	149321	148661	94715	116587		148807	112042	122594
1149	alpha-ketoglutarate	Energy	TCA Cycle	528	LC/MS Polar	93	2700	145.014	305-72-6;328-50-7;22202-68-2	51	50	C00026	HMDB00208	10630996	11821787	12822232	15896543	17085444	4614175	4091412	5396977	3201087	2152511	3869074	5765473	4903048	4806957	3920286	2818759	1394643	2004022	1873033	1636121
3631	alpha-tocopherol	Cofactors and Vitamins	Tocopherol Metabolism	1561	LC/MS Pos Late	1105	2522	430.378	59-02-9;10191-41-0	14985	14265	C02477	HMDB01893	2686456	2211647	3793595	2758006	3395813	3136941	2628661	3029714	2688018	2938649	1278600	1482243	1667411	1562338	1153843	637429		536351	770652	472057
1006	arabitol/xylitol	Carbohydrate	Pentose Metabolism	48885	LC/MS Polar	100006430	1932.4	151.061		6912		C01904		196981	180793	367220	344598	310034	179876	146941	189281	105893			117647	104707		66685			40634
1495	arachidoylcarnitine (C20)*	Lipid	Fatty Acid Metabolism(Acyl Carnitine)	57513	LC/MS Pos Late	100015833	1512	456.405			28639199		HMDB06460	84456	80304	107125	88267	133777	113617	107888	138607	114284		168603	221454	204342	231885	188366	233381	154027	317406	280586	236062
368	arginine	Amino Acid	Urea cycle; Arginine and Proline Metabolism	1638	LC/MS Pos Early	231	2825	175.119	1119-34-2	232	227	C00062	HMDB00517	668589312	670507328	608594240	591690496	695367424	758941888	721076608	922769280	930616320	737907392	356588352	339736032	372121152	337901632	369549536	697953216	447112096	612530112	554638848	576643776
369	argininosuccinate	Amino Acid	Urea cycle; Arginine and Proline Metabolism	15497	LC/MS Pos Early	232	2745	291.13	156637-58-0	828	805	C03406	HMDB00052	1518463	1376579	1173832	1646279	2435122	331161	150175	336555	133748	101384	53852	170704	190450	169618
38	asparagine	Amino Acid	Alanine and Aspartate Metabolism	512	LC/MS Pos Early	917	1225	133.061	70-47-3	6267	6031	C00152	HMDB00168	306156256	306651328	242548992	298217056	304304128	246773280	286105024	273175712	320985632	277666240	64287380	101888576	111558656	94811488	89684336	155222928	64905244	93747128	96522000	112823384
34	aspartate	Amino Acid	Alanine and Aspartate Metabolism	443	LC/MS Pos Early	234	1165	134.045	56-84-8	5960	5745	C00049	HMDB00191	287096448	232004416	347026976	365604000	283774784	92843696	69450160	113275344	92546512	65190772	118522592	173445728	165777584	157482112	111521392	96219312	56657540	86732224	71124048	84061096
3732	benzoate	Xenobiotics	Benzoate Metabolism	15778	LC/MS Neg	100000008	1750	121.029	65-85-0	243	238	C00180	HMDB01870	404984		394572		541426		598847	550413	562134				353933		593968	594165		450942	489499	450848
3528	beta-alanine	Nucleotide	Pyrimidine Metabolism, Uracil containing	55	LC/MS Pos Early	244	1905	90.055	56-41-7;107-95-9	239	234	C00099	HMDB00056	6456640	6043911	7347947	8409880	8599388	5430722	4928796	6234949	5365343	5793348	4994163	6019293	5908391	4263857	4634014	3826171	2325205	3933741	3594565	4235835
278	beta-hydroxyisovalerate	Amino Acid	Leucine, Isoleucine and Valine Metabolism	12129	LC/MS Polar	1442	1149.8	117.056	625-08-1	69362	62571		HMDB00754	632146	797151	785863	970240	951269	1799975	994589	2019602	1112386	769811						283919
6	betaine	Amino Acid	Glycine, Serine and Threonine Metabolism	3141	LC/MS Pos Early	799	1064	118.086	107-43-7	247	24219951173	C00719	HMDB00043	51089588	55042436	73293016	84669080	80009104	38426144	42788756	35537204	29177856	28299888	152431920	217753088	171956496	182631232	117964344	44638956	19689524	47844548	26329498	44350632
3676	bilirubin (Z,Z)	Cofactors and Vitamins	Hemoglobin and Porphyrin Metabolism	43807	LC/MS Pos Late	1090	1840	585.271	635-65-4	5280352	4444055	C00486	HMDB00054	76569	80932	93873	101066	87775	129729	126899		136577	142587	161373	129900	136763	155810	141254	223447	173692	236212	159928	182378
3655	biotin	Cofactors and Vitamins	Biotin Metabolism	568	LC/MS Pos Early	251	2253	245.095	58-85-5	171548	149962	C00120	HMDB00030	769157	594865	758100	724879	815963	51320		84563
216	C-glycosyltryptophan	Amino Acid	Tryptophan Metabolism	48782	LC/MS Neg	100006379	1777	365.135	180509-18-6	10981970	9157171			152656	155152	188085	210494	204967	130506	122186	164227	113862		170363	232394	222808	263549	194714	215664	159489	262674	265875	240072
2615	campesterol	Lipid	Sterol	33997	LC/MS Pos Late	100001269	2873	383.367	474-62-4	173183	151215	C01789	HMDB02869	116336		136729	193372									85452					113390
1520	carnitine	Lipid	Carnitine Metabolism	15500	LC/MS Pos Early	100000007	1978	162.112	461-05-2	10917	10455	C00318	HMDB00062	10242788	12902703	10835864	14472627	16537266	7209309	8167383	7310712	6396564	6910143	2288690	3779768	3696910	3282290	2393439	1362187	825300	1751439	1448592	1583515
1512	cerotoylcarnitine (C26)*	Lipid	Fatty Acid Metabolism(Acyl Carnitine)	57516	LC/MS Pos Late	100015835	1649	540.499			35015992		HMDB06347	368486	378316	312139		452523	175674	257131	284635	296569	287007	296425	321213	339294	334027	312436	301800	294517	374930	255790	313385
2588	cholesterol	Lipid	Sterol	63	LC/MS Pos Late	266	2707	369.352	57-88-5	11025495	4937803	C00187	HMDB00067	297205504	322498016	363050048	305438784	327069440	324872832	316352704	363499296	427021280	339382080	228916224	257977072	267067872	232894112	245500144	280803072	257485456	316239392	261858128	283080384
1760	choline	Lipid	Phospholipid Metabolism	15506	LC/MS Pos Early	1256	1961	104.107	67-48-1	305	149278	C00114	HMDB00097	359476576	222224400	545862720	562440000	285306112	332535040	117446360	296088960	159309584	93974344	176665600	258032144	297863328	232810592	222088192	176628432	105545872	165161568	164607376	155285664
1761	choline phosphate	Lipid	Phospholipid Metabolism	34396	LC/MS Pos Early	267	700	184.073	72556-74-2	1014	119298	C00588	HMDB01565	1061655168	1128407168	1177001216	1327670272	1231378688	733401408	781026112	597063744	659852416	641205312	736971648	982562880	832451584	861646848	642823744	530850368	383127744	592366208	359149440	548119232
1143	citrate	Energy	TCA Cycle	1564	LC/MS Neg	1124	582	191.02	77-92-9	311	305	C00158	HMDB00094	5575592	15512789	3119229	3352983	11727379	5749249	7775862	3229943	4055492	10159998	51373120	35448356	33107324	36133776	44949660	31613470	41141184	41270128	31765580	33691188
376	citrulline	Amino Acid	Urea cycle; Arginine and Proline Metabolism	2132	LC/MS Pos Early	391	1520	176.103	372-75-8	9750	810	C00327	HMDB00904	27179232	22941222	34424624	36737984	31110522	37809768	22458932	36192080	28709056	20809308	10936576	20397754	33055710	17518858	14828595	113778280	15723619	32087360	68165904	50648276
457	CoA-glutathione*	Amino Acid	Glutathione Metabolism	62804	LC/MS Neg	269	1326	535.084	6477-52-7	11953788	10128089	C00920		844453	1386032	1292755	1434721	1643137	149669	529073	110475	157126	476553		123096	50754	94801				65430		66299
3617	coenzyme A	Cofactors and Vitamins	Pantothenate and CoA Metabolism	46322	LC/MS Neg	270	1448	382.55	85-61-0;18439-24-2	317	311	C00010	HMDB01423	887773	1870066	1075618	1198346	1874725	419340	1134428	264858	408058	756763	114456	326249	189124	286762	73156	62333		85475	33808	158321
407	creatine	Amino Acid	Creatine Metabolism	27718	LC/MS Pos Early	1221	1947	132.077	57-00-1	586	566	C00300	HMDB00064	776531968	855844864	813291648	886787392	976295360	544296896	552528832	516555648	469509984	457379744	202300704	271591680	250882048	255459424	175663296	133686336	72330504	154810240	99648864	139363456
409	creatine phosphate	Amino Acid	Creatine Metabolism	33951	LC/MS Neg	100000112	603	210.029	922-32-7	587	567	C02305	HMDB01511			221884			361817	322300	345707	279515	555115	625897	1075062	702198	953339	362335	507790	272688	678073	213500	658684
408	creatinine	Amino Acid	Creatine Metabolism	513	LC/MS Pos Early	275	2055	114.066	60-27-5	588	568	C00791	HMDB00562	16732042	19660832	21489180	20731490	18155012	10794651	7867928	10298170	8659488	7722407	3779463	5713471	5186287	5370235	3286653	4123533	1802935	4253447	2633055	3608504
348	cysteine	Amino Acid	Methionine, Cysteine, SAM and Taurine Metabolism	1868	LC/MS Pos Early	800	1488	122.027	52-90-4;56-89-3	5862	5653	C00097	HMDB00574	20756140	27708736	23904800	21584812	24953886	20458232	24599714	24032260	26055176	27969440	17423176	15936067	17289348	17815368	17110964	14857633	8361325	13041667	13380599	15342008
441	cysteine-glutathione disulfide	Amino Acid	Glutathione Metabolism	35159	LC/MS Pos Early	100001437	2465	427.095	13081-14-6	4247235	3455404		HMDB00656	438417	346186	601561	494775	347859	586980	582361	754682	692092	681618	319318	165174	263728	185400	299479	529552	628431	698020	549842	542547
444	cysteinylglycine	Amino Acid	Glutathione Metabolism	35637	LC/MS Pos Early	278	2132	179.048	19246-18-5	439498	58762	C01419	HMDB00078	882116	1482409	1582738	1010259	1543047						1937010	993280	554560	869349	899502	197720	826101	927886
3538	cytidine	Nucleotide	Pyrimidine Metabolism, Cytidine containing	514	LC/MS Pos Early	827	2124	244.093	65-46-3	6175	5940	C00475	HMDB00089	147169696	138887712	150068896	155104048	140759648	192387552	150802320	210305728	157504544	113853592	60258892	66076796	76191776	63842664	63302928	80008784	49194060	73896352	53398060	72303552
1762	cytidine 5'-diphosphocholine	Lipid	Phospholipid Metabolism	34418	LC/MS Polar	1220	4200	533.106	33818-15-4	13804	21531769	C00307	HMDB01413	326741	472734	534461	591581	622644		61743					143937	77910	121521
3534	cytidine 5'-monophosphate (5'-CMP)	Nucleotide	Pyrimidine Metabolism, Cytidine containing	2372	LC/MS Pos Early	282	835	324.059	63-37-6	6131	5414497	C00055	HMDB00095	10541836	10467740	12502625	15256477	11128837	9151017	5310042	7253391	5111944	4952845	6803172	9135917	8783274	9207756	7071467	6342220	3273048	5415349	5004808	4925811
1102	cytidine 5'-monophospho-N-acetylneuraminic acid	Carbohydrate	Nucleotide Sugar	36831	LC/MS Polar	1223	3900	613.14	3063-71-6	448209		C00128	HMDB01176	264009	253338	208977	136250					118002	85763	217686	252684					248934	330441	180636	221341
3533	cytidine diphosphate	Nucleotide	Pyrimidine Metabolism, Cytidine containing	2841	LC/MS Neg	280	580	402.011	34393-59-4	6132	5902	C00112	HMDB01546	580980	518164	525308	573566	566606	146772	264536	84479	112235	312769
3539	cytosine	Nucleotide	Pyrimidine Metabolism, Cytidine containing	573	LC/MS Pos Early	881	2060	112.051	71-30-7	597	577	C00380	HMDB00630	85290	94308	103230	53234		88028	95206	135424	70747	90764			60092	66408	106667	61394			82456	70156
1519	deoxycarnitine	Lipid	Carnitine Metabolism	36747	LC/MS Pos Early	100001662	2052	146.118	6249-56-5	134	705	C01181	HMDB01161	2434507	1697531	2263422	2920040	3625395	1313717	1289312	1491139	888505	1241938	1195677	1854563	2006670	1714825	1517102	521844		781000	324404	741558
958	dihydroxyacetone phosphate (DHAP)	Carbohydrate	Glycolysis, Gluconeogenesis, and Pyruvate Metabolism	15522	LC/MS Pos Early	309	539	171.005	102783-56-2	668	3833110	C00111	HMDB01473	15566725	15497857	22740856	23221664	14338946	10041645	9972604	9835872	11800490	7399242	810684	2934753	2262249	2510294	2230325	4033471	2531161	3782179	2840634	4450042
382	dimethylarginine (SDMA + ADMA)	Amino Acid	Urea cycle; Arginine and Proline Metabolism	36808	LC/MS Pos Early	100001810	2850	203.15	102783-24-4	123831	110375	C03626	HMDB01539	159005536	139943264	130811416	138352912	164251504	151152512	169743792	175414496	210427584	161576496	12613884	19359304	26108126	16121371	21209476	79259904	18496218	32451902	38890288	45400392
1355	dodecanedioate (C12-DC)	Lipid	Fatty Acid, Dicarboxylate	32388	LC/MS Neg	100001102	2990	229.145	693-23-2	12736	12213	C02678	HMDB00623	679983	828266	433385	525127	727163	813858	1139478	400751	272928	368061	355542	589964	477488	944678	1168214	645772	625827	776579	956077	873998
2567	eicosanoylsphingosine (d20:1)*	Lipid	Sphingosines	57597	LC/MS Pos Late	100015870	1443	328.321						746270	757703	827098	741393	859826	493452	554122	535057	604295	650272	887948	878862	895020	822135	862399	1140757	999300	1341097	1247983	1306167
1391	eicosenamide (20:1)*	Lipid	Fatty Acid, Amide	62445	LC/MS Pos Late	100020764	1800	310.31		5365374	4517402			1402492	1843420	2214445	1512344	1943652	1261072	1415900	1639530	1832415	3193916	1827582	1431308	1558237	1328409	1423230	1681361	5055671	1641972	1833120	1628418
1502	eicosenoylcarnitine (C20:1)*	Lipid	Fatty Acid Metabolism(Acyl Carnitine)	57519	LC/MS Pos Late	100015838	1484	454.389						161215	106860	182184	110455	177351	132732	134933	143352	155948	226044	165922	185714	115252	214641		203468	125428	228073	216291	182023
4037	ergothioneine	Xenobiotics	Food Component/Plant	37459	LC/MS Pos Early	100002154	850	230.096	58511-63-0	3032311	2297320	C05570	HMDB03045	323378	366364	503736	1146956	510676	353758	313542	125206	158359	355872	175286	272961	319051	161498	143802
1393	erucamide	Lipid	Fatty Acid, Amide	35177	LC/MS Pos Late	100001444	1972	338.342	112-84-5	5365371	4517399			27590852	43669832	67855112	50840264	66593964	26396520	34357576	47041664	46368816	68475968	36181176	22931080	28532350	15824550	24175966	24544520	93057176	20461740	32186154	31669218
1136	erythronate*	Carbohydrate	Aminosugar Metabolism	42420	LC/MS Polar	100001320	2186	135.03	88759-55-1	2781043	2061231		HMDB00613	21394966	22055268	34127476	38002936	34269460	9265408	9337194	9976958	6701310	7156454	4545260	8019993	7197978	5741387	5203143	2488980	2061276	4304673	2614069	2842529
309	ethylmalonate	Amino Acid	Leucine, Isoleucine and Valine Metabolism	15765	LC/MS Polar	2054	2785	131.035	601-75-2	11756	11263		HMDB00622	514031	432835	520702	610977	709583	238466	249456	198028	194548	207302
3610	flavin adenine dinucleotide (FAD)	Cofactors and Vitamins	Riboflavin Metabolism	2134	LC/MS Neg	327	2425	784.15	146-14-5;84366-81-4	643975	559059	C00016	HMDB01248	3514457	3705349	3747161	3946446	3918595	3142497	2594017	2580298	2579882	2605530	1245748	1793821	1595788	1628658	1561726	1178189	932384	1554238	1300229	1288428
3611	flavin mononucleotide (FMN)	Cofactors and Vitamins	Riboflavin Metabolism	15797	LC/MS Neg	100000251	2390	455.097	130-40-5	710	690	C00061	HMDB01520	963290	786092	1154026	1120343	924403	247978	188840	180680	136625	136340	85528	145560	162622	140204	73232	113422		132449	141720	120352
1059	fructose	Carbohydrate	Fructose, Mannose and Galactose Metabolism	48195	LC/MS Polar	878	2065	225.062	57-48-7	5984	5764	C00095	HMDB00660	1753873	1409341	2216418	1791637	1649589	1931778	827888	2336814	1187652	740973	494646	729623	881813	643528	794869	527497	594573	474258	722442	561107
956	fructose 1,6-diphosphate/glucose 1,6-diphosphate/myo-inositol diphosphates	Carbohydrate	Glycolysis, Gluconeogenesis, and Pyruvate Metabolism	46896	LC/MS Neg	100002180	551	338.989				C00354		8444241	13370886	13485820	14977342	13075480	11292744	15722211	8874781	12702033	15012517	1577143	2272685	1138353	2249609	968688	1717201	2947977	2734724	1102926	2767184
1153	fumarate	Energy	TCA Cycle	1643	LC/MS Polar	330	3084	115.004	100-17-8	444972	10197150	C00122	HMDB00134	29433920	27035216	33544322	40178640	39007608	8071272	4989935	7374094	3705927	3082277	6399693	11742976	11270680	9859440	6775483	4779815	2157700	5478677	2914944	4646063
1085	galactonate	Carbohydrate	Fructose, Mannose and Galactose Metabolism	27719	LC/MS Polar	100001026	3085	195.051	299-28-5	128869	114198	C00880	HMDB00565	1237737	1737127	2676628	3305157	2446977	1326366	1029005	944104	671318	622186	240054	320131			563302
470	gamma-glutamyl-epsilon-lysine	Peptide	Gamma-glutamyl Amino Acid	33934	LC/MS Pos Early	100001262	2725	276.155	17105-15-6	7015685	5378717		HMDB03869	423051	406747	468325	472207	546033	361637	349946	339795	380578	508006	728653	852456	938015	797498	722264	1566902	1620055	1805097	1522430	1644441
462	gamma-glutamylcysteine	Peptide	Gamma-glutamyl Amino Acid	1778	LC/MS Pos Early	1036	2118	251.07	636-58-8	842	819	C00669	HMDB01049	4656753	6054191	4456463	5130596	7942837	982625	1308624	969716	1214551	886359	2152289	5284194	5254725	5529668	2732733	942833	110739	710963	676817	858448
463	gamma-glutamylglutamate	Peptide	Gamma-glutamyl Amino Acid	36738	LC/MS Pos Early	331	1775	277.103	1116-22-9	92865	83831	C05282	HMDB11737	2261670	1986366	5895123	6203134	3277728	4572922	2748478	4373784	2348638	2062819	2513239	4645685	5428531	4337781	3578822	2793559	1516308	3431176	2691046	3456700
464	gamma-glutamylglutamine	Peptide	Gamma-glutamyl Amino Acid	2730	LC/MS Pos Early	1140	1430	276.119	10148-81-9	150914	133013	C05283	HMDB11738	111765		84033		110015	223161	373557	515409	782803	316581	286983	537651	951360	419772	651985	908028	145517	245671	630639	505872
465	gamma-glutamylglycine	Peptide	Gamma-glutamyl Amino Acid	33949	LC/MS Pos Early	100001294	1535	205.082	1948-29-4	165527	145071		HMDB11667			706389			248791		266369			2120479	3944589	3757321	3574684	2298387			251647
467	gamma-glutamylisoleucine*	Peptide	Gamma-glutamyl Amino Acid	34456	LC/MS Pos Early	100001485	2940	261.144		14253342	21403145		HMDB11170	215843	226742	284366	253603	261818			76173			554463	1182319	1077601	1219617	669684	207127		232715	126390	220447
468	gamma-glutamylleucine	Peptide	Gamma-glutamyl Amino Acid	18369	LC/MS Neg	1268	1685	259.13	2566-39-4	151023	133115		HMDB11171	35754	56722	71782	70533	65391						387378	649195	508729	568532	324062	92864		110037	74496	100186
471	gamma-glutamylmethionine	Peptide	Gamma-glutamyl Amino Acid	44872	LC/MS Pos Early	100001313	2640	279.101	17663-87-5	7009567	5373147		HMDB29155						125618		216401	210789		59114	84094	135667	63016	176017	398393			275423	137177
473	gamma-glutamylthreonine	Peptide	Gamma-glutamyl Amino Acid	33364	LC/MS Pos Early	100001314	1750	249.108	5652-48-2	76078708	21403107		HMDB29159	306280	206473	348396	348270	363864	87785	71184	186210	101912	87008	4608779	7899132	9160264	9032652	4874221	1521950	718661	1625272	1062819	1770785
476	gamma-glutamylvaline	Peptide	Gamma-glutamyl Amino Acid	43829	LC/MS Pos Early	100001126	2700	247.129	2746-34-1	7015683			HMDB11172			159631	221549	206964						1008598	3507240	3531041	3915627	2102671	643503			327210	711701
3960	gluconate	Xenobiotics	Food Component/Plant	587	LC/MS Polar	338	2922	195.051	527-07-1	10690	10240	C00257	HMDB00625	2172842	1621526	1481783	1531340	2509660	1019506	521830	1471898	639311	362576	1813008	3656180	4686021	2931020	3873240	728475	260163		997846	651150
949	glucose	Carbohydrate	Glycolysis, Gluconeogenesis, and Pyruvate Metabolism	20488	LC/MS Polar	572	2342	179.056	50-99-7	79025	71358	C00031	HMDB00122	7385983	4555361	7063684	6472830	5051336	7042975	3256535	8548007	4069985	2431091	6946620	5092695	8709246	3789476	7392142	12608234	17534752	16867452	19126308	11787232
950	glucose 6-phosphate	Carbohydrate	Glycolysis, Gluconeogenesis, and Pyruvate Metabolism	31260	LC/MS Polar	291	4537	259.022	103192-55-8	5958	19952394	C00668	HMDB01401	22063120	22381948	27889804	27644258	39506888	14834807	10952365	16324286	7586926	7225173	554759	4405389	3104183	3180676	1341584	2556390	631150	3271263	1387470	2970258
1113	glucuronate	Carbohydrate	Aminosugar Metabolism	15443	LC/MS Polar	100000257	3233.3	193.035	207300-70-7	444791	58552	C00191	HMDB00127	3596357	3574558	6044172	5377405	4211278	3391641	1666564	5462004	2057107	1558361	1703215	2151340	2254211	1779182	1786949	1193156	1078948	1337412	1722277	1234114
41	glutamate	Amino Acid	Glutamate Metabolism	57	LC/MS Pos Early	561	1500	148.06	56-86-0	611	591	C00025	HMDB00148	1453165696	1544699392	1609691648	2032063616	1984463104	664367680	519087328	783506752	680365312	484977568	869857152	1233222400	1194960128	1082823168	772229248	637408192	363865792	648240640	513588032	556153280
50	glutamate, gamma-methyl ester	Amino Acid	Glutamate Metabolism	33487	LC/MS Pos Early	100001103	2170	162.076	1499-55-4;1499-55-4	68662	66546		HMDB61715	2384429	2144574	2238163	2633300	2900861	1350970	873521	978214	365780	682883	239020	703866	721052	827457	1076575	292909		254290	587838	321946
42	glutamine	Amino Acid	Glutamate Metabolism	53	LC/MS Pos Early	563	1291	147.076	56-85-9	5961	5746	C00064	HMDB00641	194506720	242033296	109460400	132104000	243273024	58352516	205366816	83722064	196059776	255303168	113444960	141535520	131984624	127626136	121183616	149001184	92817464	139756640	77151312	157707248
1330	glutarate (C5-DC)	Lipid	Fatty Acid, Dicarboxylate	396	LC/MS Polar	339	2900	131.035	110-94-1	743	3618533	C00489	HMDB00661	449693	553068	561332	600171	584875	231542	292025	336029	240902		263773	467065	319770	318745	271016	327097			215034
439	glutathione, oxidized (GSSG)	Amino Acid	Glutathione Metabolism	27727	LC/MS Pos Early	448	2667	613.159	103239-24-3	65359	58835	C00127	HMDB03337	28841176	23480370	36056004	38745988	29512140	4841563	4666554	4595356	3720386	5770047	8666131	11887050	9264725	10684790	5135306	3596488	2052741	6240957	2082728	4318169
438	glutathione, reduced (GSH)	Amino Acid	Glutathione Metabolism	2127	LC/MS Pos Early	496	2000	308.091	70-18-8	124886	111188	C00051	HMDB00125	211568240	255984208	204168176	247813264	301324896	50560544	56313712	41592144	40347904	34066640	126431288	216756192	177558784	193229056	127364728	48867060	12814490	32431158	32149928	45013056
969	glycerate	Carbohydrate	Glycolysis, Gluconeogenesis, and Pyruvate Metabolism	1572	LC/MS Polar	1052	2070.4	105.019	600-19-1	752	732	C00258	HMDB00139	3547357	3885916	5375875	3726914	2592451	7051411	6500539	11567170	7947708	5996393	5445890	8107324	11878105	7264605	11944402	12082502	2690482	3897697	10703070	6668931
2315	glycerol	Lipid	Glycerolipid Metabolism	15122	LC/MS Neg	1254	758	91.0401	56-81-5	753	733	C00116	HMDB00131	1621428	1608314	2023874	1741609	1487756	1372807	1778558	2143986	888602	645983	1148826	1242781	952678	1136226	1230939	1333774	784010	853212	899410	1133079
2316	glycerol 3-phosphate	Lipid	Glycerolipid Metabolism	43847	LC/MS Pos Early	100000258	580	173.021	29849-82-9	754	734	C00093	HMDB00126	7872363	4414699	11798226	11148188	5670025	2707786	1269481	2716913	1601751	1246354	4197461	7907338	8990496	8032258	5022473	3522054	1681414	3480130	3813427	3146701
1768	glycerophosphoethanolamine	Lipid	Phospholipid Metabolism	37455	LC/MS Polar	100001620	3075	214.049	33049-08-0	123874	110410	C01233	HMDB00114	8865398	8014248	12477349	10622168	12621961	7816415	5350823	9370315	5776167	5083112	1895143	2400000	2222662	2344780	1873699	2389334	2217965	2302256	2296261	1946418
2321	glycerophosphoglycerol	Lipid	Glycerolipid Metabolism	48857	LC/MS Polar	100001619	2430	245.043		439964	388990	C03274		8919521	9286258	11818648	11852957	12860156	5253296	4897435	5585299	3873541	4051479	4650899	5574569	5014108	4891302	4476577	4634398	5822340	7025493	3742538	5157685
1770	glycerophosphoinositol*	Lipid	Phospholipid Metabolism	47155	LC/MS Polar	100001621	3850	333.059	16824-65-0	167572				19010284	20299860	27044700	23906164	27803832	15288943	13899162	14816646	11125413	12660626	4101984	6281311	6402780	6770625	5546534	3487367	3041161	3861415	2548124	3422723
1764	glycerophosphorylcholine (GPC)	Lipid	Phospholipid Metabolism	15990	LC/MS Pos Early	100000269	672	258.11	28319-77-9	71920	571409	C00670	HMDB00086	573500096	474884480	580351552	483668736	492284384	913656832	547982912	987967488	700225408	538259072	627551488	705053760	732118528	676196800	596668032	719898944	545580288	659781760	674850432	568854976
1769	glycerophosphoserine*	Lipid	Phospholipid Metabolism	57404	LC/MS Pos Early	100015666	577	260.053		3081457	2339060			2357649	2272590	2669873	2595281	2502146	2369310	1373170	1484792	1984887	2110557	1457938	2103953	2225871	1830788	1724386	1878188	1347650	2191036	1599465	1787213
1	glycine	Amino Acid	Glycine, Serine and Threonine Metabolism	58	LC/MS Pos Early	340	1375	76.0393	56-40-6	750	730	C00037	HMDB00123	58585708	53236372	58125016	70555544	63804876	51012612	44774040	57736584	53795748	40181912	14055436	22536428	23171068	20282306	17211180	24421208	9920712	16917896	14493049	17849444
2787	glycochenodeoxycholate	Lipid	Primary Bile Acid Metabolism	32346	LC/MS Neg	1628	5236.1	448.307	16564-43-5	12544		C05466	HMDB00637	46343					188174	110008	170931	232111	154897			49514	48638	48998	62493	98261	150880	120750	88806
622	glycylleucine	Peptide	Dipeptide	34398	LC/MS Neg	100001258	1891	187.109	869-19-2	92843	83812	C02155	HMDB00759	63025			39678	91177		124591	143247	442303	406924	887509	241734	209401	222439	458550	862075	1230579	1455268	881578	1009675
632	glycylvaline	Peptide	Dipeptide	18357	LC/MS Neg	100000487	1320	173.093	1963-21-9	97417	2006926		HMDB28854							54224		145160	125513	193299			38853		69184	506345	433635	72147	121956
3475	guanine	Nucleotide	Purine Metabolism, Guanine containing	32352	LC/MS Pos Early	172	2032	152.057	73-40-5	764	744	C00242	HMDB00132	555726720	497614048	642450496	648718400	521175200	466646336	403342112	488887200	359297024	326720000	100890784	101205360	123028960	90235216	116357184	61901260	116447328	158426032	55273352	122662696
3474	guanosine	Nucleotide	Purine Metabolism, Guanine containing	1573	LC/MS Neg	1099	1662	282.084	118-00-3	6802	6544	C00387	HMDB00133	34583304	40460576	42577792	47147436	44238288	21329828	26817738	19380308	15956485	23301634	7881347	6977931	6354518	6618970	9383452	3615944	10338166	10528825	4078733	8754107
3492	guanosine 2'-monophosphate (2'-GMP)*	Nucleotide	Purine Metabolism, Guanine containing	52442	LC/MS Neg	100002733	1150	362.051		444571	392466			423551	1597272	100105	162145	1767188		2897068		1069643	3374813	142168	198789	57298	146781		99497	1235824	1404236		774348
3470	guanosine 3'-monophosphate (3'-GMP)	Nucleotide	Purine Metabolism, Guanine containing	39786	LC/MS Neg	100002704	773.9	362.051	117-68-0	3522	3402				429518	57731	118559	425151		2800430		876222	4017847	548893	185093		271065	62402		3438206	2193730		1127156
3469	guanosine 5'- monophosphate (5'-GMP)	Nucleotide	Purine Metabolism, Guanine containing	2849	LC/MS Pos Early	347	800	364.065	5550-12-09	6804	741	C00144	HMDB01397	2871874	3878285	4475502	5264506	3602491	2610444	7561394	1674847	3957363	9609073	1866883	884427	600079	1325369	1742368	331122	7816252	5298275	364691	3095378
3629	gulonate*	Cofactors and Vitamins	Ascorbate and Aldarate Metabolism	46957	LC/MS Polar	100001586	2750	195.051	20246-53-1	9794176	7969943	C00257	HMDB03290	20109648	25608676	32564328	42091200	39605560	8993463	7950080	8463228	4488608	6725656	716030	1250946	988314	970950	614513	108695	197021	364331	159677	267177
3675	heme	Cofactors and Vitamins	Hemoglobin and Porphyrin Metabolism	41754	LC/MS Pos Late	100001386	1124	616.176	14875-96-8	26945		C00032	HMDB03178	948588	677567	725695	515689	680423	1115603	1463201	1267785	930801	1306506	321517	644242	313470	469234	638313	412629	271305	317906	511167	558028
2566	heptadecasphingosine (d17:1)	Lipid	Sphingosines	57427	LC/MS Pos Late	100015724	1377	286.274	6918-48-5	5283557	4446670			4130516	4567759	4940004	4318553	5218348	1862774	2428361	1628964	2193392	2667996	8277783	9452355	7878002	7843113	8241113	8577087	8173063	12563008	8840476	8634897
1357	hexadecanedioate (C16-DC)	Lipid	Fatty Acid, Dicarboxylate	35678	LC/MS Neg	100001614	4615	285.207	505-54-4	10459	10027	C19615	HMDB00672	105412		119147	141111	102562	214178	177808					110808	76801	135505	90805	100352			187664	185555
2565	hexadecasphingosine (d16:1)*	Lipid	Sphingosines	57428	LC/MS Pos Late	100015723	1289	272.258			28533427			2288291	2444755	2311977	2133401	2773046	1454205	1720632	1617035	1790547	2030719	3066833	3756381	3358579	3266313	3349357	4154797	4375694	4996079	4025735	4060344
1464	hexanoylcarnitine (C6)	Lipid	Fatty Acid Metabolism(Acyl Carnitine)	32328	LC/MS Pos Late	100000781	800	260.186	6920-35-0	6426853	4932273		HMDB00705	611225	886936	875110	669860	887415	892550	1378870	600531	602499	788779	608156	738659	708664	1642064	1323615	643397	781898	834550	860982	1010895
3718	hippurate	Xenobiotics	Benzoate Metabolism	15753	LC/MS Neg	100000014	2106.9	178.051	495-69-2	464	451	C01586	HMDB00714	206117	177735	172045	155146	249589	168455	131442	196188	165022	134897		80967	90125			65560		87305	48251	81664
65	histidine	Amino Acid	Histidine Metabolism	59	LC/MS Neg	355	755.9	154.062	5934-29-2	6274	752	C00135	HMDB00177	25378610	26657016	24681488	25788956	26755714	27018952	27871784	33266484	32185204	27749934	10023352	12128061	11876277	10209503	12011540	18870448	10693187	14937471	13321965	17033546
343	homocysteine	Amino Acid	Methionine, Cysteine, SAM and Taurine Metabolism	15128	LC/MS Pos Early	311	2155	136.043	454-29-5	778	757	C00155	HMDB00742	1108845	890234	1201523	1357781	1028812	896336	762510	930750	1117965	405641	300954	1027463	1098684	1068086	857771	710386	78533	190848	161465	312450
360	hypotaurine	Amino Acid	Methionine, Cysteine, SAM and Taurine Metabolism	590	LC/MS Polar	358	2763.4	108.012	300-84-5	107812	96959	C00519	HMDB00965	238628	267324	320959	493865	409991	119533	88049	110349	72110	76990	83344	129339	117550	73914
3416	hypoxanthine	Nucleotide	Purine Metabolism, (Hypo)Xanthine/Inosine containing	3127	LC/MS Neg	171	1291.2	135.031	68-94-0	790	768	C00262	HMDB00157	78389472	75342720	89405960	96269936	84713424	40180208	27843550	41697344	26041350	22997044	17139424	24262748	20922088	22909366	15086819	18556164	10142454	17827898	11815666	16838550
76	imidazole lactate	Amino Acid	Histidine Metabolism	15716	LC/MS Pos Early	100000263	2040	157.061	14403-45-3	440129	389128	C05568	HMDB02320	428926	327173	415955	640294	622467	972690	850622	786594	633692	726127			122912	142408
74	imidazole propionate	Amino Acid	Histidine Metabolism	40730	LC/MS Pos Early	100003434	2263	141.066	1074-59-5	70630	63798		HMDB02271	159342	148631	181825	239591	226956	93810	90270	128998	69190	91435
3415	inosine	Nucleotide	Purine Metabolism, (Hypo)Xanthine/Inosine containing	1123	LC/MS Neg	361	1602.1	267.073	58-63-9	6021	21241953	C00294	HMDB00195	71502040	95066096	75455184	89766808	107463424	33266942	36152464	31053822	27240182	33652188	26546986	27538830	20176608	26866736	19402972	12529791	19364924	25182634	10877620	20154968
1740	inositol 1-phosphate (I1P)	Lipid	Inositol Metabolism	43849	LC/MS Polar	370	4785	259.022	573-35-3;106032-59-1	440194	17215924	C01177	HMDB00213	341519	1845526	3315741	827034	3165407	3251556	2328641	6716281	3818421	2076578	752953	687193	1306676	679438	774416	3449954	2092298	2943816	3203311	3487740
294	isoleucine	Amino Acid	Leucine, Isoleucine and Valine Metabolism	1125	LC/MS Pos Early	376	2800	132.102	73-32-5	6306	769	C00407	HMDB00172	364766368	411334656	336738528	362104288	436690976	308844448	352677632	369665024	375608480	350392768	164500928	235698320	231362576	243000736	198777200	283995392	115419856	221941104	184388992	246600528
656	isoleucylglycine	Peptide	Dipeptide	40008	LC/MS Neg	100003169	1992	187.109	868-28-0	342532	303621		HMDB28907	2956344	8203624	1209319	1321239	6881781	2496539	8863852	3716318	9240840	13495029	8518550	6127273	4178224	6299074	6254936	6249150	15181122	11204782	4485219	7760912
271	isovalerylcarnitine (C5)	Amino Acid	Leucine, Isoleucine and Valine Metabolism	34407	LC/MS Pos Early	100001393	3085	246.17	31023-24-2	6426851	4932271		HMDB00688	1201511	1310613	1244500	1681602	1587977	1178374	1534467	1151927	1058262	1390177	1869349	2915413	2914869	3221747	2135666	1724480	882702	1712265	1369043	1996796
220	kynurenine	Amino Acid	Tryptophan Metabolism	15140	LC/MS Pos Early	100000265	2739	209.092	2922-83-0	161166	141580	C00328	HMDB00684	846648	843276	867234	1156015	1067829	860126	713930	817312	740904	741947	233131	302513		263436	156074	214471		254996	158688	211094
966	lactate	Carbohydrate	Glycolysis, Gluconeogenesis, and Pyruvate Metabolism	527	LC/MS Polar	482	1468.8	89.0244	79-33-4	612	592	C00186	HMDB00190	24827888	25802248	18342336	24009152	26600086	20614400	15519144	24510044	16627662	13060040	10817610	15726688	18470382	16407012	10246259	6199297	3928058	18707900	4417745	9127615
259	leucine	Amino Acid	Leucine, Isoleucine and Valine Metabolism	60	LC/MS Pos Early	397	2864	132.102	61-90-5	6106	5880	C00123	HMDB00687	525916256	622447744	428806528	449068000	622801856	501345952	601914752	700546112	876298880	707078592	416676800	398370176	367440128	396741920	390299904	698299840	425767968	648384640	514800320	633307456
670	leucylalanine	Peptide	Dipeptide	40010	LC/MS Pos Early	100003179	2801	203.139	7298-84-2	259321	227625		HMDB28922						99996			385647	415335	7707891			154159	926635	2749286	107736768	44739468	6882397	4331073
841	leucylglutamine*	Peptide	Dipeptide	48189	LC/MS Pos Early	100003183	2620	260.161		4305457	3511125		HMDB28927	236154	324087	190975	159626	278403	255930	446828	408941	1162006	810383	13945108	457832	547772	446581	1788947	4084056	83387960	52302448	7553632	6445770
675	leucylglycine	Peptide	Dipeptide	40045	LC/MS Pos Early	100003185	2778	189.123	686-50-0	79070	71402		HMDB28929	348426	691366	239527	193405	564836	547259	1108109	882228	2047288	3377245	26053736	1730753	900816	2892742	7208450	5193419	76702560	62157740	10920069	13759626
92	lysine	Amino Acid	Lysine Metabolism	1301	LC/MS Pos Early	407	2850	147.113	56-87-1	5962	5747	C00047	HMDB00182	202219632	231712848	159743296	158463200	211516144	198799648	251953600	244781936	295278528	257520656	170141808	172596128	163669264	169598784	184585216	276808064	168427088	242746304	190241248	234940176
1154	malate	Energy	TCA Cycle	1303	LC/MS Neg	409	615.6	133.014	6915-15-7	525	510	C00149	HMDB00156	103304096	129326440	147849456	172422016	162150528	37758176	18902412	24138352	14018196	11970924	33451412	55735500	52895560	41846160	37597832	24236832	9412245	20397030	11258370	17248400
1342	maleate	Lipid	Fatty Acid, Dicarboxylate	20676	LC/MS Polar	100000707	2640	115.004	110-16-7	444266	392248	C01384	HMDB00176	697253	683545	770337	954710	1187758	611897	532442	379311	944125	317746	298170	662000	486414	677412	688994	580445	628618	563118	618133	586077
1064	mannitol/sorbitol	Carbohydrate	Fructose, Mannose and Galactose Metabolism	46142	LC/MS Polar	100001740	2320	181.072		5780	440	C00794	HMDB00247	2584035	2639550	3417356	3527648	4172823	4768193	4175336	4856550	3573038	3390677	1896061	2515765	2348451	1957179	1744857	1028499	966040	1450751	955446	1207248
1065	mannose	Carbohydrate	Fructose, Mannose and Galactose Metabolism	48153	LC/MS Polar	803	2200	225.062	3458-28-4	18950	141983	C00159	HMDB00169	2599187	1497185	2745893	2434832	1955229	2665980	1137750	3000388	1202852	874525	600086	971568	1289508	334537	1089234	925444	711374	983339	1066269	936146
1066	mannose-6-phosphate	Carbohydrate	Fructose, Mannose and Galactose Metabolism	1469	LC/MS Polar	294	4510	259.022	70442-25-0;104872-94-8	439198	19969422	C00275	HMDB01078	6736225	6946991	8503546	7887019	11082004	4884973	3654524	5615779	2512397	2300354	132905	1247526	1047582	644700	340055	837010	168151	835864	446321	918433
329	methionine	Amino Acid	Methionine, Cysteine, SAM and Taurine Metabolism	1302	LC/MS Pos Early	415	2526	150.058	63-68-3	6137	5907	C00073	HMDB00696	360342048	412898496	285669696	291420736	391949696	366996608	417184928	456533408	560529472	456137728	247628480	232903520	228196528	238018576	236580416	426600800	308899200	405575168	300455008	371091776
333	methionine sulfone	Amino Acid	Methionine, Cysteine, SAM and Taurine Metabolism	44878	LC/MS Pos Early	100004635	1250	182.048	820-10-0	69961	63154			362817	430887	329453	581571	397052	574666	463362	596750	534301	465775
334	methionine sulfoxide	Amino Acid	Methionine, Cysteine, SAM and Taurine Metabolism	18374	LC/MS Pos Early	100000039	1272	166.053	3226-65-1	158980	139840	C02989	HMDB02005	7861029	6748676	7138292	7978029	8232886	9450044	8419686	10870752	11159548	9542509	4730265	4422195	5187268	4110361	4763537	9182355	7011241	11388333	9386828	10888815
1431	methylmalonate (MMA)	Lipid	Fatty Acid Metabolism (also BCAA Metabolism)	1496	LC/MS Polar	418	3078.4	117.019	516-05-2	487	473	C02170	HMDB00202	15511253	21937812	9589138	13192915	23986472	5506934	8054277	5295314	4742194	6635940	1253522	2127224	1284075	1647694	1210239	1285438	1134801	1433000	1224467	1707951
3564	methylphosphate	Nucleotide	Purine and Pyrimidine Metabolism	37070	LC/MS Pos Early	100001805	544	113	7023-27-0	13130	12578		HMDB61711	2589775	2030483	2852783	2275597	2231589	2424700	1534331	1631710	1806715	1241343	1681571	1997467	2720720	3096616	6181037	1390540	700739	1015006	2540143	1257266
310	methylsuccinate	Amino Acid	Leucine, Isoleucine and Valine Metabolism	15745	LC/MS Polar	2051	2800	131.035	498-21-5	10349	9922		HMDB01844	695954	631759	899541	957781	984872		306410	383635		260698	356296	560346	304678	368202		314873	256243	285223
1731	myo-inositol	Lipid	Inositol Metabolism	1124	LC/MS Polar	363	3506.3	225.062	87-89-8	892	10239179	C00137	HMDB00211	58379900	56876132	73250944	76842096	79483264	30087560	22238240	25757504	19521974	18895810	13162014	15891428	16823846	15277586	12676696	9311273	7767386	11646721	9276160	10704459
117	N,N,N-trimethyl-5-aminovalerate	Amino Acid	Lysine Metabolism	57687	LC/MS Pos Early	100015962	2186	160.133			34236878			653068	979340	896277	696412	1125858	511645	794273	898343			480563	449375	725597	554527	187027		415073
1126	N-acetyl-beta-glucosaminylamine	Carbohydrate	Aminosugar Metabolism	35469	LC/MS Pos Early	1216	1897	221.113	4229-38-3	439454	388560	C01239	HMDB01104	534593		337247	670127	367439	1109219	479078	1043507	499192				228201	171949		208631
1118	N-acetyl-glucosamine 1-phosphate	Carbohydrate	Aminosugar Metabolism	15741	LC/MS Polar	1212	4052	300.049	31281-59-1	440364	389323	C04256	HMDB01367			173358	174921	274729	95258	76693	105293	106600		802109	371185	418378	409049	451385	512701	688534	1145330	694449	730319
30	N-acetylalanine	Amino Acid	Alanine and Aspartate Metabolism	1585	LC/MS Polar	1110	1564.8	130.051	97-69-8	88064	79449	C02847	HMDB00766	24503988	26986960	19567170	22314164	29014664	19459776	21979048	21100652	19301848	20302068	6329975	10189588	7728614	9207695	6254970	8225922	5095947	8545725	4526620	7824143
39	N-acetylasparagine	Amino Acid	Alanine and Aspartate Metabolism	33942	LC/MS Pos Early	100001257	785	175.071	4033-40-3	99715	90090		HMDB06028	1330279	1200333	1587285	2080813	1929892	702128	750659	729252	551458	558447		79053	83009
35	N-acetylaspartate (NAA)	Amino Acid	Alanine and Aspartate Metabolism	22185	LC/MS Polar	100000787	3143	174.041	997-55-7;997-55-7	65065	58576	C01042	HMDB00812	1163333	1003571	1789312	1936252	2255703	380437	322773	503287	231206	372505	135804	226465	246759	332571	200419	220306	105502	239601	181814	264350
349	N-acetylcysteine	Amino Acid	Methionine, Cysteine, SAM and Taurine Metabolism	1586	LC/MS Pos Early	1107	1416	164.038	616-91-1	12035	11540	C06809	HMDB01890	233346	340742	189385	237374	383516	123554	258225	179093	225624	346822	181718	212002	254686	328364	133738	210613		178339	59116	207649
1117	N-acetylglucosamine 6-phosphate	Carbohydrate	Aminosugar Metabolism	15107	LC/MS Polar	1213	4114	300.049	102029-88-9	439219	8216065	C00357	HMDB02817	462372	512933	677221	578082	732932	636138	516309	903475	589740	513791	219407	756937	970258	473577	425941	996412		253247	460930	493616
1138	N-acetylglucosamine/N-acetylgalactosamine	Carbohydrate	Aminosugar Metabolism	46539	LC/MS Pos Early	100006435	715	222.097		24139			HMDB00215	14506881	16820458	17571004	13764403	12106013	16383833	15093464	17340244	16418017	14517825	14780898	18051742	20123372	18888824	20061480	18036336	15249742	21535536	19007836	19422548
1135	N-acetylglucosaminylasparagine	Carbohydrate	Aminosugar Metabolism	48149	LC/MS Pos Early	1215	1212	336.14	2776-93-4	123826	21403014	C04540	HMDB00489	353714	450255	320432	505536	661540		138546	92864	81151	100754		192363	107227	130115
44	N-acetylglutamate	Amino Acid	Glutamate Metabolism	15720	LC/MS Polar	100000282	3106	188.056	5817-08-03	70914	1266066	C00624	HMDB01138	1011475	1065744	1516483	1507056	1731187	174802	140280	197318	117766	156088	496057	711612	576230	724404	441299	217007	194144	323326	113778	266784
45	N-acetylglutamine	Amino Acid	Glutamate Metabolism	33943	LC/MS Pos Early	100001253	845	189.087	2490-97-3	182230	158492	C02716	HMDB06029	893768	908528	1173781	1240609	1369689	151123	98525	120627	120511	127170	1036935	1901527	1610589	1455384	939622	597494	299006	882937	447313	707504
330	N-acetylmethionine	Amino Acid	Methionine, Cysteine, SAM and Taurine Metabolism	1589	LC/MS Neg	1083	1787	190.054	65-82-7	448580	395338	C02712	HMDB11745	11531487	15021197	9230041	9421907	13969304	14871888	19556796	18632596	22232680	23957218	9212710	9130456	7922191	8623697	7606983	13246954	11068320	16544562	7644269	13074059
335	N-acetylmethionine sulfoxide	Amino Acid	Methionine, Cysteine, SAM and Taurine Metabolism	45428	LC/MS Pos Early	100005463	880	208.064	108646-71-5	193368	167798			1882822	1648658	1817247	1803675	1610476	3143011	2920244	4194277	4735976	3178215	1023458	1185527	1158182	1054403	779816	2459977	1690296	3542497	1441378	2412878
1124	N-acetylneuraminate	Carbohydrate	Aminosugar Metabolism	32377	LC/MS Pos Early	1162	660	310.113	131-48-6	439197	10292217	C00270	HMDB00230	28446958	32125208	30867356	30122164	30654004	27364696	28828964	27269708	28852644	32265982	26678984	33740744	31629260	33890040	28393416	22552236	20163956	26498860	20068660	24453534
426	N-acetylputrescine	Amino Acid	Polyamine Metabolism	37496	LC/MS Pos Early	192	2230	131.118	18233-70-0	122356	109095	C02714	HMDB02064	1549517	1694214	1578876	2112460	2473168	80551	143886	210804	140991	204956
10	N-acetylserine	Amino Acid	Glycine, Serine and Threonine Metabolism	37076	LC/MS Pos Early	100001851	800	148.06	97-14-3	65249	58744		HMDB02931	20399208	17379868	20827800	22185312	21117176	16200296	12463097	19370204	16130023	8646199	4010373	5933730	6402434	6283852	4232364	6691420	2405807	4617344	4490256	5395724
17	N-acetylthreonine	Amino Acid	Glycine, Serine and Threonine Metabolism	33939	LC/MS Neg	100001274	821.6	160.062	17093-74-2	152204	3841173			2149292	2743008	2399416	2733967	3159796	1583834	2033369	1375051	1355231	1968392	421923	715922	516289	595209	379007	401771	259207	432762	209951	350157
331	N-formylmethionine	Amino Acid	Methionine, Cysteine, SAM and Taurine Metabolism	2829	LC/MS Neg	194	1543.8	176.039	4289-98-9	439750	388809	C03145	HMDB01015	733785	761852	851398	968710	870916	461315	334151	512765	366684	290733	196640	393404	327830	391814	188947	158976		200643	75357	148222
4101	N-glycolylneuraminate	Xenobiotics	Food Component/Plant	37123	LC/MS Pos Early	100001491	636	326.108	1113-83-3	123802	3794850	C03410	HMDB00833	380698	477963	479169	495187	537980	317201	204921	105984	183410	335615	486705	728731	492304	752471	486589	363722		498454	229683	384280
400	N-monomethylarginine	Amino Acid	Urea cycle; Arginine and Proline Metabolism	43586	LC/MS Pos Early	100004488	2845	189.135	53308-83-1	132862	117259	C03884	HMDB29416	10489546	8979665	8578515	8312722	10894634	11779216	10917589	15423029	20401362	11748966	2936562	2630671	3992468	2055519	3646928	12690197	3281908	6692058	7355150	9666043
1709	N-stearoyltaurine	Lipid	Endocannabinoid	39730	LC/MS Neg	100003240	5782	390.268	63155-80-6	168274	147194															59042		154161	84112	105649	71383	78805	75981
3446	N1-methyladenosine	Nucleotide	Purine Metabolism, Adenine containing	15650	LC/MS Pos Early	1242	2120	282.12	15763-06-1	27476	4573813	C02494	HMDB03331	3883020	1902482	11141166	12392867	2586168	3849274	1136777	3708570	740621	437839	147432	191249	361891	196105	212835	284881	156469	346734	180714	265928
3483	N2,N2-dimethylguanosine	Nucleotide	Purine Metabolism, Guanine containing	35137	LC/MS Pos Early	100001412	2210	312.13	2140-67-2	92919	83878		HMDB04824	1982449	775394	5350715	5531444	1025198	1590393	496312	1106780	265679	177568		47769
99	N6,N6,N6-trimethyllysine	Amino Acid	Lysine Metabolism	1498	LC/MS Pos Early	189	2825	189.16	23284-33-5	440120	140379	C03793	HMDB01325	3991259	4049738	3858054	3848768	3968488	4920353	4529792	5972310	5649055	5018505	1078220	1297610	1595972	1329058	1150317	3528738	1639225	2978197	1397900	2641546
94	N6-acetyllysine	Amino Acid	Lysine Metabolism	36752	LC/MS Neg	100001734	1059	187.109	692-04-6	92832	83801	C02727	HMDB00206	81961	152461	35036	46408	113305		158789	61506	199613	253358	68398		37032	55712	74208	205887	74415	147292	112058	117578
3456	N6-carbamoylthreonyladenosine	Nucleotide	Purine Metabolism, Adenine containing	35157	LC/MS Neg	100001415	2164	411.127	24719-82-2	161466	141829		HMDB41623	375051	282743	744690	686406	315531	256598	126602	248226	107463	74774		67846	57273	99363				21410
3447	N6-methyladenosine	Nucleotide	Purine Metabolism, Adenine containing	37114	LC/MS Pos Early	213	2264	282.12	1867-73-8	1869	92307		HMDB04044	539115	500844	678528	792172	619699	880698	352939	1109994	403696	210814		140581	151478	82186	74019	176556	125566	270459	60314	266153
3466	N6-succinyladenosine	Nucleotide	Purine Metabolism, Adenine containing	48130	LC/MS Neg	100001664	940	382.1	4542-23-8	165243			HMDB00912	136866	640618	243321	318167	1019024						218470	366539		477188	36227			77620
3585	nicotinamide	Cofactors and Vitamins	Nicotinate and Nicotinamide Metabolism	594	LC/MS Pos Early	432	1942	123.055	98-92-0	936	911	C00153	HMDB01406	318516352	325758944	375557792	367074368	349332288	205909232	209098832	222950464	194913984	171548160	97978168	154530736	136640624	167091024	108235392	98856008	40126304	98707920	58416900	93290568
3589	nicotinamide adenine dinucleotide (NAD+)	Cofactors and Vitamins	Nicotinate and Nicotinamide Metabolism	5278	LC/MS Neg	1310	1434	662.102	53-84-9	5893	5681	C00003	HMDB00902	604212	541813	639106	663152	564339	314486	339358	230000	253091	366734	961174	1384527	600075	1452094	560460	107774		153900	129915	162678
3588	nicotinamide riboside	Cofactors and Vitamins	Nicotinate and Nicotinamide Metabolism	33013	LC/MS Pos Early	100001310	2040	255.098	1341-23-7	439924		C03150	HMDB00855	426352	512343	537400	590556	738691	370714	279266	427037	251794	285088	81948		148772		74642
3583	nicotinate ribonucleoside	Cofactors and Vitamins	Nicotinate and Nicotinamide Metabolism	33471	LC/MS Pos Early	100001316	1536	256.082	2625-49-2	161234	141635	C05841	HMDB06809	4739737	3964930	4889417	4575439	4201292								445110			386851
178	O-methyltyrosine	Amino Acid	Tyrosine Metabolism	37451	LC/MS Pos Early	100002078	2790	196.097	1080-06-4	76957	69406		HMDB14903	570552	656944	604178	593671	731531	440883	468234	461783	473655	430653	395191	572393	395167	726424	476124	154679		261083	203029	244967
1696	oleoyl ethanolamide	Lipid	Endocannabinoid	38102	LC/MS Pos Late	1137	1661	326.305	11-58-0;111-58-0	5283454	4446574		HMDB02088	1492995	1345304	1831187	1730166	1683316	1055989	1064220	1500913	1375394	1113901	582836	748415	832201	859281	797241	1122491	595559	1245513	1054819	983869
1529	oleoylcholine	Lipid	Fatty Acid Metabolism (Acyl Choline)	53260	LC/MS Pos Late	100009331	1449	368.352						66231	62298	203043	185561	71242							75264		59087				73057	42862
452	ophthalmate	Amino Acid	Glutathione Metabolism	34592	LC/MS Pos Early	100001311	2085	290.135	495-27-2	7018721	7993181		HMDB05765	940669	942762	1099214	1246311	1398951	85660	111963	98647	84787	96689	2005820	3475373	3178581	3280628	1818551	638139	191724	616357	373540	675570
372	ornithine	Amino Acid	Urea cycle; Arginine and Proline Metabolism	1493	LC/MS Pos Early	444	2800	133.097	3184-13-2	6262	6026	C00077	HMDB03374	14316755	5337726	11882637	13328684	6769339	19209168	8733304	23283930	12874570	6445210	5496375	8253780	9914058	7861745	7091195	19595536	10836439	14372591	12581261	14126393
3496	orotate	Nucleotide	Pyrimidine Metabolism, Orotate containing	1505	LC/MS Polar	445	1638.1	155.01	50887-69-9	967	942	C00295	HMDB00226	45117688	56008056	9873699	19158384	64576376	257860	2640720	405043	2583889	6419287	2637625	3597916	2801372	3669212	2536937	2320625	1714315	3039291	1898478	2881269
3498	orotidine	Nucleotide	Pyrimidine Metabolism, Orotate containing	35172	LC/MS Polar	100001416	2250	287.052	314-50-1	92751	83729		HMDB00788	2511483	2682271	3791797	4114408	4344790	1416400	1400409	1357803	941562	1116760	529191	957973	683172	638040	517644	259866	210619	403120	270590	319407
1699	palmitoyl ethanolamide	Lipid	Endocannabinoid	38165	LC/MS Neg	1489	6300	298.275	544-31-0	4671	4509	C16512	HMDB02100	803992	516390	485791	715320	590517	302764	407502	459620	506470	210051	447802	555378	611071	491412	714697	835198	574099	613740	533324	629274
1476	palmitoylcarnitine (C16)	Lipid	Fatty Acid Metabolism(Acyl Carnitine)	44681	LC/MS Pos Late	100000776	1425	400.342	6865-14-1	461	448	C02990	HMDB00222	710694	1028875	1198033	1102399	1652414	227837	313782	217702	280769	458520	1396232	2415810	1573404	2221764	1584016	235185	268625	676968	360512	370400
1528	palmitoylcholine	Lipid	Fatty Acid Metabolism (Acyl Choline)	52944	LC/MS Pos Late	100009233	1482	342.337		151731	133731			131435	101747	253402	249301	137940							100999	67843	67083	46216			94013	65324	70181
3619	pantetheine	Cofactors and Vitamins	Pantothenate and CoA Metabolism	57555	LC/MS Neg	100001495	2765	277.123	496-65-1	439322	388453	C00831		1663046	602920	1468574	1273907	713111	4854784	1281470	5252409	4217047	826484	1033791	1316705	1819815	976657	2455186	1721876	830224	1110745	1878726	1585481
3612	pantothenate	Cofactors and Vitamins	Pantothenate and CoA Metabolism	1508	LC/MS Pos Early	1024	1667	220.118	137-08-6	6613	6361	C00864	HMDB00210	62681552	57593676	88812648	109570048	79645792	31529392	17231020	29941256	16511898	9656945	106051784	170081264	143142976	154904608	94813512	45232336	23144044	68350040	38351352	63946516
4454	penicillin G	Xenobiotics	Drug - Antibiotic	37468	LC/MS Pos Early	100002155	2870	335.106	69-57-8	5904	2259	C05551	HMDB15186	8362424	8096118	8713840	8631760	10685853	5089038	4109428	5822574	5238027	3566703	3187709	4324383	5561970	4162996	3572972	4567177	3049995	5726700	3931502	4417991
4880	phenol red	Xenobiotics	Chemical	36817	LC/MS Neg	100001724	3665.9	353.049	143-74-8	4766	4602	C12600		874826	969718	796748	712574	1052399	1086151	809337	1206199	1164461	835532	1803085	2021860	2324045	2007190	1980715	1733820	1505644	2701947	1949234	1852750
920	phenylacetylglycine	Peptide	Acetylated Peptides	33945	LC/MS Neg	100001275	2375	192.067	500-98-1	68144	61452	C05598	HMDB00821	412491	348733	377511	498974	535602	176727	169538	216033	168664	88775	117758	165008	194873	173768	107012	64739		74585	48307	103150
118	phenylalanine	Amino Acid	Phenylalanine Metabolism	64	LC/MS Pos Early	460	2878	166.086	63-91-2	6140	5910	C00079	HMDB00159	496709088	602104576	386409600	390330848	607545920	494809536	629402240	614943680	787714752	701035264	403595584	405423328	370081408	418196064	389476064	630164928	428739648	579009984	442940032	557912512
724	phenylalanylalanine	Peptide	Dipeptide	41374	LC/MS Pos Early	100003589	2909	237.123	3918-87-4	5488196	4589716									169500	137073	817372	474137	4522582	186198	355746	173197	963944	2579349	13795863	10909797	4026417	3745032
728	phenylalanylglycine	Peptide	Dipeptide	41370	LC/MS Pos Early	100003588	2898	223.108	721-90-4	98207	88678		HMDB28995	2340575	4353149	1366656	1014160	3342861	3669392	8003091	7795348	21697850	16430152	26018056	8509069	8438417	8319420	14764401	28854610	55009976	47070616	25293402	28295982
1168	phosphate	Energy	Oxidative Phosphorylation	42109	LC/MS Pos Early	461	576	98.9842	7664-38-2	1061	1032	C00009	HMDB01429	258298784	234181616	264022320	242068656	263075776	278525504	276288128	296405088	269930912	252153600	184278560	213571520	222056160	212561312	173192416	254826016	224740416	291010528	212827200	213488832
964	phosphoenolpyruvate (PEP)	Carbohydrate	Glycolysis, Gluconeogenesis, and Pyruvate Metabolism	597	LC/MS Neg	463	587.3	166.975	10526-80-4	1005	980	C00074	HMDB00263	3062754	2088475	5712977	4114823	1993063	4752734	6167355	5790123	8700567	6029974	2905359	6229346	5476461	4867225	2807848	8431536	2569930	3576579	3655646	6110291
1766	phosphoethanolamine	Lipid	Phospholipid Metabolism	1600	LC/MS Pos Early	1026	700	142.026	1071-23-4	1015	990	C00346	HMDB00224	1193877	1112974	1446539	1689092	1579240	368792	204774	363298	237480
3614	phosphopantetheine	Cofactors and Vitamins	Pantothenate and CoA Metabolism	15504	LC/MS Neg	100000328	1597	357.089	NA	987	103123	C01134	HMDB01416	5315011	2726543	6052077	5915667	3378786	9331753	3068607	9388040	9632108	2197857	1292887	2089266	2871333	1561102	1719266	2459620	866284	1355592	1927317	2228569
2441	phytosphingosine	Lipid	Sphingolipid Synthesis	1510	LC/MS Pos Late	469	1367	318.3	554-62-1	122121	21238683	C12144	HMDB04610	3685281	4067806	4752758	4272933	4833252	1869702	1824451	2361777	2294946	2438933	1490884	1881122	1577795	1403133	1414059	1930735	1712224	2640815	1708391	1726071
379	proline	Amino Acid	Urea cycle; Arginine and Proline Metabolism	1898	LC/MS Pos Early	480	1603	116.071	147-85-3	145742	128566	C00148	HMDB00162	708531776	721998336	655453952	767278080	755162752	500971936	508137088	619538944	574220032	482756928	283460256	345907072	361994208	349394848	288078144	319582496	195960576	333201024	211192160	325497568
747	prolylglycine	Peptide	Dipeptide	40703	LC/MS Pos Early	100003674	2136	173.092	2578-57-6	6426709	4932143		HMDB11178	4662887	5920369	2300122	2623871	6284220	4420327	7046741	10032866	15187703	8272213	13697535	10198288	10031872	9945592	12347786	18521584	9800899	15173413	10852751	17048640
1428	propionylcarnitine (C3)	Lipid	Fatty Acid Metabolism (also BCAA Metabolism)	32452	LC/MS Pos Early	100001162	2590	218.139	17298-37-2	107738	96904	C03017	HMDB00824	1037664	1433038	927645	1513682	1874882	1796138	2940422	1731832	2164009	2746923	910727	719042	577650	950900	553467			307861	515347	435374
1630	prostaglandin A2	Lipid	Eicosanoid	19761	LC/MS Neg	100000578	4876	333.207	13345-50-1	5280880	4444403	C05953	HMDB02752	10465212	5020721	8050823	8588791	5311450	4900462	2771738	3900140	3694556	1753944	586936	730754	1907840	770102	1172059	1565873	723307	1397673	1301742	1061684
1628	prostaglandin E2	Lipid	Eicosanoid	7746	LC/MS Neg	487	4573	351.218	363-24-6	5280360	4444059	C00584	HMDB01220	61958712	35227864	58913216	72774800	39430144	43846988	24596884	42696732	33035224	16672084	4303708	5222060	11914130	4290505	7738424	13326437	7476493	10732168	12420699	10361215
1640	prostaglandin F2alpha	Lipid	Eicosanoid	19398	LC/MS Neg	100000574	4658	353.233	551-11-1	5280363	4444062	C00639	HMDB01139	1139408	1338724	839004	741120	961547	1023225	737390	485998	714060	424552	1840633	2606110	4191393	2199622	2513945	5913178	3330135	5913056	5512643	4858243
3510	pseudouridine	Nucleotide	Pyrimidine Metabolism, Uracil containing	33442	LC/MS Neg	821	1100	243.062	1445-07-4	15047	21403010	C02067	HMDB00767	5447622	3129509	8876245	8543324	3496244	6452158	2223412	5704586	2092493	1493885	748091	1265545	1542244	1229091	1404236	1192335	789531	1548581	980885	1334669
3664	pterin	Cofactors and Vitamins	Pterin Metabolism	43023	LC/MS Pos Early	100004216	1805	164.057	22363-60-4	73000	65806	C00715	HMDB00802	448500	249408	656488	665255	419009	740455	542045	795090	800943	650764	384506	780683	727935	741505	365052	136554		143957		178835
414	putrescine	Amino Acid	Polyamine Metabolism	1408	LC/MS Pos Early	49	3027	89.1073	110-60-1	1045	13837702	C00134	HMDB01414	10430107	7740134	10885744	12847799	11039426	1584498	1876488	1643772	1498887	1274661	615615	939369	829773	775150	867177	598041	483385	754775	403380	609003
3715	pyridoxal	Cofactors and Vitamins	Vitamin B6 Metabolism	1651	LC/MS Pos Early	491	2343	168.066	65-22-5	1050	1021	C00250	HMDB01545	10956140	12302244	13642764	12710886	11291408	7066427	5264644	5680611	4987868	4870605	8037140	8532142	7602671	9432203	7434566	7062468	6701210	8045301	4518251	5186978
3712	pyridoxamine	Cofactors and Vitamins	Vitamin B6 Metabolism	2150	LC/MS Pos Early	568	2975	169.097	58052-48-5	1052	1023	C00534	HMDB01431	3508723	3602617	3784799	4227763	4070057	2882706	1737781	2627643	2075296	1940144	3733156	5302159	4831951	6040037	3903768	2890887	1726937	3504283	2383585	2857984
3713	pyridoxamine phosphate	Cofactors and Vitamins	Vitamin B6 Metabolism	3138	LC/MS Pos Early	493	1932	249.063	529-96-4	1053	1024	C00647	HMDB01555	679455	643512	619558	582692	781340	567818	471220	495990	608132	557758	297511	437445	394337	397086	318414	309787	297090	465064	367973	347838
51	pyroglutamine*	Amino Acid	Glutamate Metabolism	46225	LC/MS Pos Early	100001540	1900	129.066	2353-44-8	134508	118562			1795745	2062211	1624402	2329446	2706580	1404737	1534986	1591893	1542713	1595369	2728962	3054984	3275163	3350652	2557459	2091327	1202769	2279089	1681235	2187763
965	pyruvate	Carbohydrate	Glycolysis, Gluconeogenesis, and Pyruvate Metabolism	48990	LC/MS Polar	823	1083	87.0088	127-17-3	1060	96901	C00022	HMDB00243	1311203	814385	1990406	2119118	1315646	1344614	1599480	1787115	912846	727785	350066	643271	604733	841729	834140	910501			502147	540112
3696	retinol (Vitamin A)	Cofactors and Vitamins	Vitamin A Metabolism	1806	LC/MS Pos Late	498	1636	269.226	68-26-8	445354	393012	C00473	HMDB00305	168345	212182	228442	204962	231989	203863	248298	217375	149715	207677	146790	138677	155397	128864	92971	64082		46473	65130	96788
984	ribitol	Carbohydrate	Pentose Metabolism	15772	LC/MS Polar	100000406	1789.6	151.061	488-81-3	6912	10254628	C00474	HMDB00508	189529	223226	363846	375556	365256	82574			35407		73104	127007	178232	118306	83500			56607		41069
3609	riboflavin (Vitamin B2)	Cofactors and Vitamins	Riboflavin Metabolism	1827	LC/MS Neg	500	3160	255.089	83-88-5	493570	431981	C00255	HMDB00244	480575	568317	716808	777908	787226	241351	200821	265881	191928	142087	252108	283195	312023	279854	447565	320458	197273	379298	519736	299480
985	ribonate	Carbohydrate	Pentose Metabolism	27731	LC/MS Polar	100001007	2425	165.04	5336-08-03	5460677	4574162	C01685	HMDB00867	1036171	930418	1968290	2597748	2237216	492380	329352	469309		273282		342542
983	ribose	Carbohydrate	Pentose Metabolism	1471	LC/MS Polar	914	1508.2	195.051	50-69-1	5779	4470639	C00121	HMDB00283	5344657	5748534	7030988	6392147	5814556	5234191	3741521	6481992	3619365	3580399	3309528	3124446	4143236	3790908	3597237	2326893	1494386	2015404	2166759	1904149
975	ribose 1-phosphate	Carbohydrate	Pentose Phosphate Pathway	1763	LC/MS Polar	219	4025	229.012	50-99-7;58459-37-3	439236	388373	C00620	HMDB01489	1141023	1678580	1356065	1633091	2142056	1017840	1286031	1095954	1088807	1318687	451297	507087	480882	420625	255417	237186	789607	754674	257833	381429
973	ribulose 5-phosphate	Carbohydrate	Pentose Phosphate Pathway	1474	LC/MS Polar	296	3922	229.012	18265-46-8;108321-99-9	439184	388327	C00199	HMDB00618	922174	1460883	1264583	1264298	1745365	427963	422172	469066	413280	816115	778074	321308	178026	441126	83951	155222	408699	443363		220230
59	S-1-pyrroline-5-carboxylate	Amino Acid	Glutamate Metabolism	42370	LC/MS Pos Early	35	1528	114.055	2906-39-0	1196	10140206	C04322	HMDB01301	17064590	11085309	16207719	20405036	12799404	7605738	6211721	13412710	12364236	3527110		305723	703354		463364	4342047	1709449	2333187	1191081	917724
340	S-adenosylhomocysteine (SAH)	Amino Acid	Methionine, Cysteine, SAM and Taurine Metabolism	42382	LC/MS Neg	197	1832.4	383.114	979-92-0	439155	16788012	C00021	HMDB00939	1254865	1210294	1310674	1396079	1430366	1397722	1051712	1392904	1284042	837280	421198	769759	842822	656072	610028	544371	268737	491860	611599	580686
339	S-adenosylmethionine (SAM)	Amino Acid	Methionine, Cysteine, SAM and Taurine Metabolism	15915	LC/MS Pos Early	1263	3002	399.145	24346-00-7;86867-01-8;86867-0108	34756		C00019	HMDB01185	3588399	4004089	3978621	4864223	5961105	3067257	3237442	2512261	2416479	2697673	1001949	1416182	1325059	1415342	920867	489049	479037	1084062	392046	643526
443	S-lactoylglutathione	Amino Acid	Glutathione Metabolism	15731	LC/MS Pos Early	1343	2124	380.112	54398-03-7	440018	1053	C03451	HMDB01066	7296807	5916721	13194453	13306861	8790497	2537827	1786452	2118311	694256	485962		301860	180596	566229	106444	133249
442	S-methylglutathione	Amino Acid	Glutathione Metabolism	33944	LC/MS Pos Early	100001259	2200	322.107	2922-56-7	3605667	2841309	C11347		444133	565713	444301	663195	1000922	77390	76481				158040	362010	220221	422642
1009	sedoheptulose	Carbohydrate	Pentose Metabolism	53237	LC/MS Polar	100002619	2255	209.067	3019-74-7	5459879	4573620		HMDB03219	5239314	3109250	8160595	7746415	4527311	3334033	1091600	3316828	1149549	771508	1325589	2494388	3474116	2388873	3014753	1539350	173110	1427219	2074976	1385030
977	sedoheptulose-7-phosphate	Carbohydrate	Pentose Phosphate Pathway	35649	LC/MS Neg	100001628	599.6	289.033	2646-35-7	616	596	C05382	HMDB01068	10851058	9012557	10627924	10795660	10271331	5943851	4492166	6075621	4053782	3723675	2268206	4740946	3638566	4264382	2110599	3343574	1316662	4123435	2638398	3885847
9	serine	Amino Acid	Glycine, Serine and Threonine Metabolism	1648	LC/MS Pos Early	503	1239	106.05	56-45-1	5951	5736	C00065	HMDB00187	135360800	144797088	100036384	103778592	143966384	154117920	165354928	213009584	226220000	175047952	61020568	72725104	78713176	67569744	72013616	129709416	66755320	87852168	94335080	100246576
3893	shikimate 3-phosphate	Xenobiotics	Food Component/Plant	38656	LC/MS Pos Early	100002628	583	255.026	63959-45-5	121947	108789	C03175		521681	416703	489693	454830	481294		105301	136710	122797			234785	203918	259700	136419	172836		171732	107566	168333
417	spermidine	Amino Acid	Polyamine Metabolism	485	LC/MS Pos Late	50	700	146.165	124-20-9	1102	1071	C00315	HMDB01257	64359456	47563080	70575560	64055540	43358676	51884720	36138348	29868348	27658204	19641844	16142957	24942328	21115630	29395546	38195976	16050948	3511872	3413356	20599092	14393711
422	spermine	Amino Acid	Polyamine Metabolism	603	LC/MS Pos Late	507	758	203.223	71-44-3	1103	1072	C00750	HMDB01256	3974277	3720555	3020284	3500980	2470029	3477449	2248544	3898986	3774104	1624205	2629745	2828136	3081901	3309198	5853283	8149126	2099179	2279886	8265940	6443369
2440	sphingadienine	Lipid	Sphingolipid Synthesis	57426	LC/MS Pos Late	100015643	1350	298.274	25696-03-1	6449795	4952479			14549271	16851950	15587788	14033574	19881936	14046686	16439210	16534296	18258384	19485430	20009640	23817926	21557016	21116464	20961224	24353720	23628060	30920488	23966888	24553700
2438	sphinganine	Lipid	Sphingolipid Synthesis	17769	LC/MS Pos Late	313	1413	302.305	3102-56-5	3126	3014	C00836	HMDB00269	20445204	20887288	25162040	22057188	24092652	8071196	8339457	9057594	9235262	9921927	32268380	36384148	37117652	35318632	38078352	53337576	46455448	63827380	56074928	54490384
2557	sphingosine	Lipid	Sphingosines	17747	LC/MS Pos Late	297	1393	300.29	123-78-4	5353955	4510275	C00319	HMDB00252	118312552	130825984	128476776	113001848	143272704	79351608	86224160	82180728	89894384	96200104	136715104	158721712	145428736	144291040	142972880	167831264	152354528	196980256	163366512	167287104
4178	stachydrine	Xenobiotics	Food Component/Plant	34384	LC/MS Pos Early	100001296	1440	144.102	4136-37-2	115244	103115	C10172	HMDB04827	789682	697341	593033	969930	883000	456581	410128	412211	544159	442784	713629	550651	515318	402057	338155		155524	173201	88934	230683
1478	stearoylcarnitine (C18)	Lipid	Fatty Acid Metabolism(Acyl Carnitine)	34409	LC/MS Pos Late	100001391	1485	428.373	18822-91-8	6426855	21233653		HMDB00848	534237	523159	642139	628040	947209	356828	413545	301527	386340	567349	727614	868911	738877	941217	874373	762114	589492	926697	822690	872760
361	taurine	Amino Acid	Methionine, Cysteine, SAM and Taurine Metabolism	2125	LC/MS Neg	512	690	124.007	107-35-7	1123	1091	C00245	HMDB00251	2740072	3091828	3598763	5572251	4975943	1500451	1397858	1415785	924529	1393553	1801142	2812253	2069817	1623423	1408558	434330	277085	530412	275922	368894
2788	taurochenodeoxycholate	Lipid	Primary Bile Acid Metabolism	18494	LC/MS Neg	1629	5250	498.289	6009-98-9	387316	343282	C05465	HMDB00951	92675	76376				221490	97984	221685	234564	176468	75295	72826	145566	56432	76612	84545	129176	210247	218607	95749
1356	tetradecanedioate (C14-DC)	Lipid	Fatty Acid, Dicarboxylate	35669	LC/MS Neg	100001613	4000	257.176	821-38-5	13185	12630		HMDB00872	295434	314239	209918	252093	361681	628948	518104	208207	256875	324640	315576	334656	303138	496733	452601	348735	439535	438561	427499	535970
3688	thiamin (Vitamin B1)	Cofactors and Vitamins	Thiamine Metabolism	5341	LC/MS Pos Early	873	3050	265.112	59-43-8	1130		C00378	HMDB00235	92265408	93789824	97802360	90845624	105830992	7892668	7113159	7991006	5901090	5028638	4325798	7021491	7778507	6824950	5603587	6139677	3469009	6487694	5039981	5550688
3690	thiamin diphosphate	Cofactors and Vitamins	Thiamine Metabolism	35670	LC/MS Neg	522	1195.1	423.03	154-87-0	1132	8715	C00068	HMDB01372	383142	461574	458183	719266	595815		185697	119060	173708	183553		94377		96260		34122		69215
3689	thiamin monophosphate	Cofactors and Vitamins	Thiamine Metabolism	15798	LC/MS Pos Early	523	2378	345.078	532-40-1	3382778	2627905	C01081	HMDB02666	497343	623147	597057	641380	502546	1135960	783716	1290604	1153519	919690	424960	742095	793733	925588	438088	961734	528093	848757	644988	782139
4925	thioproline	Xenobiotics	Chemical	53231	LC/MS Pos Early	100009232	1250	134.027	34592-47-4	93176	84120			5507100	5911550	3484847	4429127	7154730	6427931	7153167	6897199	7212096	6989121	5949395	6229042	5997571	8006378	6755138	6384606	3771739	4752736	4558204	5278421
16	threonine	Amino Acid	Glycine, Serine and Threonine Metabolism	1284	LC/MS Pos Early	564	1514	120.066	72-19-5	6288	6051	C00188	HMDB00167	195683712	209857408	160396192	176668976	213209536	191458560	204372288	259498112	268914976	219043664	82554264	111578312	110741672	109511000	93996168	143887376	74305432	112356144	97099312	117280592
785	threonylphenylalanine	Peptide	Dipeptide	31530	LC/MS Neg	100001125	2322	265.119	16875-27-7	4099799	3313819		HMDB29068											1675836	95189		120323	280160	112228	4584457	4107076	208331	462895
3559	thymidine	Nucleotide	Pyrimidine Metabolism, Thymine containing	2183	LC/MS Neg	872	1963.7	241.083	50-89-5	5789	5585	C00214	HMDB00273	3862658	9675189	4622924	5411023	8440993	1181227	4502148	1278369	1566029	5274211	3500321	4886976	3228328	4157937	3464815	1518210	3692994	5065318	739283	2730677
3556	thymidine 3'-monophosphate	Nucleotide	Pyrimidine Metabolism, Thymine containing	37122	LC/MS Neg	100001938	1015	321.049	40705-89-3	5463	5264				243910			145762		213307			556133	556487	208706	34308	212580	186377		1642367	1336334		477942
3560	thymine	Nucleotide	Pyrimidine Metabolism, Thymine containing	604	LC/MS Neg	882	1654	125.036	65-71-4	1135	1103	C00178	HMDB00262	903539	1125284	1435335	1569332	1300290	179990	153415	196636	70161	175562		120850	132237	89972	89290	112972	89228	74592
393	trans-4-hydroxyproline	Amino Acid	Urea cycle; Arginine and Proline Metabolism	32306	LC/MS Pos Early	1001	1064	132.066	51-35-4	5810	5605	C01157	HMDB00725	342929696	345836512	388545824	449972672	423158912	215493792	208758848	229206672	205941776	162705088	5944246	8283795	8809152	8002745	6010887	12097762	6308741	13655512	9604956	10127845
209	tryptophan	Amino Acid	Tryptophan Metabolism	54	LC/MS Pos Early	565	2986	205.097	73-22-3	6305	6066	C00078	HMDB00929	111726248	120281496	98615144	104489400	128358320	93243624	116843096	114666112	125686696	111232768	58307592	81616880	70374032	85726016	67419112	86168944	45419720	84086792	56383680	81795864
795	tryptophylglycine	Peptide	Dipeptide	43028	LC/MS Neg	100003609	2481	260.104	7360-09-0	263471	231453		HMDB29083									152267	61473	482676	51406	62582	43704	183144	554590	1407886	1278383	612070	650977
134	tyrosine	Amino Acid	Tyrosine Metabolism	1299	LC/MS Pos Early	815	2430	182.081	60-18-4	6057	5833	C00082	HMDB00158	148492688	163876896	108041200	118614320	178082464	147517488	169121472	217977712	207531440	251712320	73712616	78652064	79523784	81239560	66688680	120313464	71202856	106656376	86789512	102666448
811	tyrosylglycine	Peptide	Dipeptide	41375	LC/MS Neg	100003598	1635	237.088	673-05-5	259323	227627		HMDB29105	136291	227293	46136		192678	189046	513888	451135	1419088	1057952	3154186	526717	589546	433652	1311291	3902095	9736694	7046519	4430946	4004743
1094	UDP-galactose	Carbohydrate	Nucleotide Sugar	15860	LC/MS Polar	100000298	4000	565.048	2956-16-3;91183-98-1;137868-52-1	18068	17069	C00052	HMDB00302	1509426	1815195	2133460	2161377	2541175	1506945	1601904	1242891	1247569	1532621	528129	715389	525207	614280	384518	229737	241479	434961		305846
1090	UDP-glucose	Carbohydrate	Nucleotide Sugar	32344	LC/MS Polar	1096	3950	565.048	117756-22-6	8629	8308	C00029	HMDB00286	4468113	5610363	5427664	5717639	7235050	4153903	4017439	2881300	2827789	3723104	1002538	1008859	906104	1286544	587855	80687	351425	603818		234673
1095	UDP-glucuronate	Carbohydrate	Nucleotide Sugar	2763	LC/MS Neg	1097	588	579.027	28053-08-9;63700-19-6	17473	16522	C00167	HMDB00935	28205404	27348170	31853864	38940108	32773788	16524731	14249385	9619950	11291275	14337984	1476948	2114756	1370054	1789296	1376360	523819	653483	1146115	231860	785723
1101	UDP-N-acetylglucosamine/galactosamine	Carbohydrate	Nucleotide Sugar	46148	LC/MS Polar	100002957	3665	606.074						3059004	3527114	3891552	4122896	4556171	2943149	2711564	2200200	2105086	2268219	920809	1466240	838640	1255664	805773	326333	592348	751832	153957	572398
3509	uracil	Nucleotide	Pyrimidine Metabolism, Uracil containing	605	LC/MS Polar	825	1089.7	111.02	66-22-8	1174	1141	C00106	HMDB00300	204558976	185009632	246125792	258828256	223522784	147095520	109355976	164152528	92741664	72348896	15532284	37471808	43037388	30772656	22596548	32564106	8071293	23333220	19994528	26310854
3425	urate	Nucleotide	Purine Metabolism, (Hypo)Xanthine/Inosine containing	1604	LC/MS Neg	1134	757.1	167.021	69-93-2;120K5305	1175		C00366	HMDB00289	807087	561133	1865483	1794465	830333	1769870	1853385	1674867	894065	1062422	3543789	10347636	7906813	9377119	5028246	2100287	474441	1678121	980186	1983505
3508	uridine	Nucleotide	Pyrimidine Metabolism, Uracil containing	606	LC/MS Neg	535	1457.6	243.062	58-96-8	6029	5807	C00299	HMDB00296	40451628	64125248	50021748	60741004	69904192	50348584	91078352	54846248	58281364	89871616	55642104	71617816	58034616	62506908	56251856	40358280	42214152	58146584	34178576	54417860
3505	uridine 3'-monophosphate (3'-UMP)	Nucleotide	Pyrimidine Metabolism, Uracil containing	39764	LC/MS Neg	106	750	323.029	35170-0-7;35170-03-7	101543	91753	C01368		1214471	3572833	212503	213683	3033903	456467	10618767	236139	6929578	17330256	4845011	3673820	2005687	3384368	1549980	4012417	19871096	18841114	1134069	11442795
3502	uridine 5'-diphosphate (UDP)	Nucleotide	Pyrimidine Metabolism, Uracil containing	5345	LC/MS Neg	870	599.5	402.995	21931-53-3	6031	5809	C00015	HMDB00295	1707298	1911043	1821716	2054673	2162258	1422778	1980219	1281330	1623521	2085076	246097	440840	117334	194543	126834	82178	276858	198890	90348	260207
3503	uridine 5'-monophosphate (UMP)	Nucleotide	Pyrimidine Metabolism, Uracil containing	2856	LC/MS Neg	869	627	323.029	3387-36-8	6030	1399139	C00105	HMDB00288	317150	409467	368387	461608	485257	156187	312088	138293	243515	224071
3501	uridine 5'-triphosphate (UTP)	Nucleotide	Pyrimidine Metabolism, Uracil containing	33448	LC/MS Neg	871	572	482.961	19817-92-6	6133	5903	C00075	HMDB00285	434489	419484	484090	416851	332168	262513	429526	260064	314850	330449		258519		93441	48145	24169				39875
316	valine	Amino Acid	Leucine, Isoleucine and Valine Metabolism	1649	LC/MS Pos Early	566	2479	118.086	72-18-4	6287	6050	C00183	HMDB00883	162662800	193085696	130667648	132666712	186196304	170517072	191041168	229474608	268332528	204054176	89443040	112965768	111138088	112299096	103067024	200936256	85530736	131304480	134154336	156262272
827	valylglutamine	Peptide	Dipeptide	42079	LC/MS Neg	100003640	1484	244.13	42854-54-6	5253209	4419671		HMDB29125	98871	370287			275617	238049	545469	370437	1026909	1266834	11590590	505709	243121	570694	1618762	2337576	38339560	28579526	4357954	4995671
828	valylglycine	Peptide	Dipeptide	40475	LC/MS Pos Early	100003641	2444	175.108	686-43-1	136487	120256		HMDB29127	1067425	7969424	460289		6098609	1844631	11255221	2510975	9212391	27482654	22455338	10941094	4743320	13535185	15669091	15790132	51738796	44090872	17783386	24626944
831	valylleucine	Peptide	Dipeptide	39994	LC/MS Pos Early	100003210	3138	231.17	22906-55-4	352039	312586		HMDB29131	156403	234450	120796		230657	128828	374908	243238	651517	694919	22014700	418274	278636	506721	1385739	1616441	72577672	52608352	2823661	3031011
3417	xanthine	Nucleotide	Purine Metabolism, (Hypo)Xanthine/Inosine containing	3147	LC/MS Polar	1004	2023	151.026	69-89-6	1188	1151	C00385	HMDB00292	162566048	151265216	203039248	193220192	184557856	161793744	156540064	168211136	116935192	115511440	193399232	324884384	282641888	307676288	236640448	187004288	94164744	185775904	108659952	185300160
3419	xanthosine	Nucleotide	Purine Metabolism, (Hypo)Xanthine/Inosine containing	15136	LC/MS Neg	100000299	1075	283.068	146-80-5	64959	58484	C01762	HMDB00299	999048	908189	2406012	2843927	2666841	265123	312278	215862	201616	339152	413695	1024494	718793	1087865	364321	1023152	354410	1006078	532934	568196
987	xylulose 5-phosphate	Carbohydrate	Pentose Metabolism	37285	LC/MS Polar	100001968	3955	229.012	105931-44-0	439190	388330	C00231	HMDB00868	1594312	2517449	2542618	2359677	2754581	614757	426582	727274	735987	379851	1422042	431716	226787	607907	123701	275450	899229	995817		319239

## Sheet: ScaledImpData (cells HD4)
													SAMPLE_NAME	UNDA-00048	UNDA-00049	UNDA-00050	UNDA-00051	UNDA-00052	UNDA-00053	UNDA-00054	UNDA-00055	UNDA-00056	UNDA-00057	UNDA-00058	UNDA-00059	UNDA-00060	UNDA-00061	UNDA-00062	UNDA-00063	UNDA-00064	UNDA-00065	UNDA-00066	UNDA-00067
													SAMPLE_ID	4917544	4917545	4917546	4917547	4917548	4917549	4917550	4917551	4917552	4917553	4917554	4917555	4917556	4917557	4917558	4917559	4917560	4917561	4917562	4917563
													CLIENT_IDENTIFIER	4T1_Ctrl_1	4T1_Ctrl_2	4T1_Ctrl_3	4T1_Ctrl_4	4T1_Ctrl_5	4T1_KD_1	4T1_KD_2	4T1_KD_3	4T1_KD_4	4T1_KD_5	EpH4_Ctrl_1	EpH4_Ctrl_2	EpH4_Ctrl_3	EpH4_Ctrl_4	EpH4_Ctrl_5	EpH4_KD_1	EpH4_KD_2	EpH4_KD_3	EpH4_KD_4	EpH4_KD_5
													BRADFORD_HD4	10.904	11.819	12.107	12.745	12.635	10.923	9.991	11.662	10.009	10.504	4.297	6.909	5.253	6.312	3.679	4.279	2.597	4.893	3.716	5.421
													CELL_COUNT_X10E6	16.6	13.2	15.2	14.6	16.5	12.6	10.8	12.6	10.7	11	10.1	10.6	13.1	11.6	11.3	12.9	14.8	14.3	14.1	14.9
													CELL_LINE	4T1	4T1	4T1	4T1	4T1	4T1	4T1	4T1	4T1	4T1	EpH4	EpH4	EpH4	EpH4	EpH4	EpH4	EpH4	EpH4	EpH4	EpH4
													GROUP_DESCRIPTION	4T1 Scrambled Ctrl	4T1 Scrambled Ctrl	4T1 Scrambled Ctrl	4T1 Scrambled Ctrl	4T1 Scrambled Ctrl	4T1 Aqp7 knockdown	4T1 Aqp7 knockdown	4T1 Aqp7 knockdown	4T1 Aqp7 knockdown	4T1 Aqp7 knockdown	EpH4 Scrambled Ctrl	EpH4 Scrambled Ctrl	EpH4 Scrambled Ctrl	EpH4 Scrambled Ctrl	EpH4 Scrambled Ctrl	EpH4 Aqp7 knockdown	EpH4 Aqp7 knockdown	EpH4 Aqp7 knockdown	EpH4 Aqp7 knockdown	EpH4 Aqp7 knockdown
													GROUP_NUMBER	1	1	1	1	1	2	2	2	2	2	3	3	3	3	3	4	4	4	4	4
													TREATMENT	Ctrl	Ctrl	Ctrl	Ctrl	Ctrl	Aqp7_KD	Aqp7_KD	Aqp7_KD	Aqp7_KD	Aqp7_KD	Ctrl	Ctrl	Ctrl	Ctrl	Ctrl	Aqp7_KD	Aqp7_KD	Aqp7_KD	Aqp7_KD	Aqp7_KD
PATHWAY_SORTORDER	BIOCHEMICAL	SUPER_PATHWAY	SUB_PATHWAY	COMP_ID	PLATFORM	CHEMICAL_ID	RI	MASS	CAS	PUBCHEM	CHEMSPIDER	KEGG	Group HMDB_ID	4T1_Ctrl	4T1_Ctrl	4T1_Ctrl	4T1_Ctrl	4T1_Ctrl	4T1_Aqp7_KD	4T1_Aqp7_KD	4T1_Aqp7_KD	4T1_Aqp7_KD	4T1_Aqp7_KD	EpH4_Ctrl	EpH4_Ctrl	EpH4_Ctrl	EpH4_Ctrl	EpH4_Ctrl	EpH4_Aqp7_KD	EpH4_Aqp7_KD	EpH4_Aqp7_KD	EpH4_Aqp7_KD	EpH4_Aqp7_KD
3568	(3'-5')-adenylyluridine	Nucleotide	Dinucleotide	52740	LC/MS Neg	100009060	2002	572.115	3051-84-1	112074	100483			1.2998	0.8664	0.6759	0.6759	1.0844	0.6759	3.7643	0.6759	3.8373	2.8206	0.6759	0.6759	1.0903	0.6759	0.8853	0.9584	0.6759	0.766	0.8301	1
3573	(3'-5')-cytidylyluridine*	Nucleotide	Dinucleotide	62399	LC/MS Neg	100020728	1522	548.104						0.9509	1.0685	0.2447	0.2447	0.9419	0.2447	3.438	0.2447	2.4474	2.1019	0.2447	0.6714	1.0715	0.2447	1.0491	0.5887	0.7097	1.1731	0.2447	0.9318
3577	(3'-5')-uridylylcytidine*	Nucleotide	Dinucleotide	62398	LC/MS Neg	100020729	1591	548.104						0.8875	0.7319	0.7319	0.7319	0.7319	1.2093	5.3176	0.7783	4.4079	3.6829	0.7319	0.7319	1	0.7319	1.4601	0.7319	0.7319	0.7779	0.7319	0.9003
3579	(3'-5')-uridylyluridine	Nucleotide	Dinucleotide	52741	LC/MS Neg	100009058	1688	549.088	2415-43-2	102258	92384			1.2755	1.2137	0.3658	0.3658	1.2446	0.6644	4.5653	0.3658	3.2632	3.5496	0.3658	0.6602	0.7051	0.7863	1.5697	0.7076	0.3658	0.578	0.3658	0.3658
432	(N(1) + N(8))-acetylspermidine	Amino Acid	Polyamine Metabolism	57814	LC/MS Pos Early	100016038	3080	188.176						6.2734	7.2957	4.8854	4.5911	7.8784	1.2246	1.4464	0.7752	1.4277	1.2326	0.6187	1.0082	0.9918	0.8187	0.7497	0.5837	0.4454	0.8262	0.4777	0.676
297	1-carboxyethylisoleucine	Amino Acid	Leucine, Isoleucine and Valine Metabolism	62558	LC/MS Neg	100020427	2628	202.108						1.0465	0.9834	0.6741	1.5493	1.396	1.2898	0.708	1.0166	0.68	0.8226	0.6741	0.6741	0.6741	0.6741	0.6741	0.6741	0.6741	0.6741	0.6741	0.6741
261	1-carboxyethylleucine	Amino Acid	Leucine, Isoleucine and Valine Metabolism	62559	LC/MS Neg	100020425	2663	202.108						0.8031	1.2069	0.662	0.9281	2.1113	0.6819	0.662	1.392	1.0719	0.662	0.662	0.662	0.662	0.662	0.662	0.662	0.662	0.662	0.662	0.662
120	1-carboxyethylphenylalanine	Amino Acid	Phenylalanine Metabolism	62566	LC/MS Neg	100020419	2844	236.093			19276386			1	0.8287	0.9576	1.206	1.5895	0.8793	1.0597	0.8287	0.8287	0.8287	0.8287	0.8287	0.8287	0.8287	0.8287	0.8287	0.8287	0.8287	0.8287	0.8287
3442	1-methyladenine	Nucleotide	Purine Metabolism, Adenine containing	1527	LC/MS Pos Early	54	2133	150.077	5142-22-3	78821	71157	C02216	HMDB11599	1.802	0.6912	4.8887	4.6257	1	0.1834	0.1483	0.1483	0.1483	0.1483	0.1483	0.1483	0.1483	0.1483	0.1483	0.1483	0.1483	0.1483	0.1483	0.1483
66	1-methylhistidine	Amino Acid	Histidine Metabolism	30460	LC/MS Pos Early	100001051	2755	170.092	332-80-9	92105	83153	C01152	HMDB00001	0.9391	1.0998	0.843	1.1234	1.9454	0.6996	0.4838	1.0609	0.7162	1.3631	0.4838	0.4838	0.4838	0.4838	0.4838	0.4838	0.4838	0.4838	0.4838	0.4838
1581	13-HODE + 9-HODE	Lipid	Fatty Acid, Monohydroxy	37752	LC/MS Neg	100002196	5275	295.228		43013				1.636	0.6055	1.9639	3.1517	0.6291	1.2079	0.4367	1.1661	0.8339	0.2115	0.4457	0.5156	0.7326	0.3163	0.4637	1.3929	1.3261	1.959	1.8485	1.2351
3548	2'-deoxycytidine	Nucleotide	Pyrimidine Metabolism, Cytidine containing	15949	LC/MS Pos Early	100000125	2193	228.098	951-77-9	13711	13117	C00881	HMDB00014	1.0404	2.3952	0.972	1.04	2.1873	0.2054	0.5761	0.2788	0.2638	0.5663	1.0952	1.4575	1.0149	1.3698	0.9851	0.5896	1.0528	1.78	0.2757	0.9071
3491	2'-deoxyguanosine	Nucleotide	Purine Metabolism, Guanine containing	1411	LC/MS Neg	348	1751	266.089	961-07-9	187790	163230	C00330	HMDB00085	1.0633	3.0343	1.0449	1.2063	2.5283	0.145	1.3042	0.1694	0.4293	1.5613	1.073	0.9551	0.6428	0.8159	0.9435	0.2634	1.6404	1.7114	0.1622	0.9524
3423	2'-deoxyinosine	Nucleotide	Purine Metabolism, (Hypo)Xanthine/Inosine containing	15076	LC/MS Neg	100000135	1688	251.079	890-38-0	65058	58569	C05512	HMDB00071	1.0057	2.9014	1.025	1.1924	2.4892	0.1634	1.1542	0.1765	0.3388	1.2068	0.9774	1.1146	0.6489	0.9943	0.8067	0.2482	1.2129	1.4488	0.1163	0.794
3524	2'-deoxyuridine	Nucleotide	Pyrimidine Metabolism, Uracil containing	52602	LC/MS Neg	536	1586	227.067	951-78-0	13712	13118	C00526	HMDB00012	1.5732	3.1244	2.1068	2.3215	3.7743	0.1731	0.3901	0.2954	0.1455	0.3914	1.0879	1.9907	1.6131	1.5295	0.9121	0.8433	0.4635	1.2033	0.3966	0.7817
3549	2'-O-methylcytidine	Nucleotide	Pyrimidine Metabolism, Cytidine containing	57554	LC/MS Pos Early	100010895	2411	258.108	2140-72-9	150971	133067			6.0049	2.4672	16.7595	14.9899	3.8936	9.4864	1.1737	10.8788	1	0.4501	0.2402	0.8544	1.2042	0.9454	0.7469	0.8422	0.2402	0.8012	0.8567	0.7769
1334	2-hydroxyglutarate	Lipid	Fatty Acid, Dicarboxylate	37253	LC/MS Polar	100002070	3352.8	147.03	40951-21-1	43	42	C02630	HMDB00606	9.7056	11.21	14.6438	16.8288	15.3403	1.1868	1.1448	1.0742	0.8511	0.9296	0.8977	1.4629	0.8008	1.0704	0.6318	0.2654	0.4262	0.5648	0.183	0.4448
1548	2-hydroxypalmitate	Lipid	Fatty Acid, Monohydroxy	35675	LC/MS Neg	100001579	5511.2	271.228	764-67-0	92836	83805		HMDB31057	0.8856	0.7874	0.9866	1.4847	1.0242	0.6229	0.7159	0.8264	0.5982	0.4847	1.0504	1.4011	1.3798	1.2239	1.2467	1.0134	0.9407	1.3645	0.9729	1.1788
1550	2-hydroxystearate	Lipid	Fatty Acid, Monohydroxy	17945	LC/MS Neg	1239	5695	299.259	629-22-1	69417	62625	C03045		0.9757	0.8894	0.9764	1.9641	1.0547	0.6316	0.648	1.0624	0.4364	0.5196	1.1984	1.7164	1.7923	1.4112	1.641	1.0214	0.7564	0.9786	0.8313	1.0375
1164	2-methylcitrate/homocitrate	Energy	TCA Cycle	52282	LC/MS Neg	100008929	575	205.035						1.0295	1.2041	1.2112	1.4209	1.3351	0.8539	0.7725	1	0.8993	0.8108	0.2995	0.2995	0.2995	0.2995	0.2995	0.2995	0.2995	0.2995	0.2995	0.2995
375	2-oxoarginine*	Amino Acid	Urea cycle; Arginine and Proline Metabolism	55072	LC/MS Pos Early	100002784	1760	174.087	3715-10-04	558	542	C03771	HMDB04225	1.1712	0.7962	1.8485	1.101	0.8693	1.8212	1	2.2212	1.2182	0.7072	0.1508	0.1508	0.1508	0.1508	0.1508	0.6445	0.1508	0.1508	0.3081	0.1508
962	2-phosphoglycerate	Carbohydrate	Glycolysis, Gluconeogenesis, and Pyruvate Metabolism	35629	LC/MS Polar	100000093	4346	184.986	70195-25-4	59	13766841	C00631	HMDB03391	0.564	0.5388	0.9891	0.7198	0.5257	0.7698	1.3164	0.9181	1.3489	1.4153	0.5546	1.0988	1.1225	0.6624	0.3929	1.3493	1.0109	1.6142	1.2444	2.1365
3615	3'-dephosphocoenzyme A	Cofactors and Vitamins	Pantothenate and CoA Metabolism	18289	LC/MS Neg	100000138	2013	686.142	3633-59-8	444485	392407	C00882	HMDB01373	1.7973	2.5353	1.5915	1.4989	2.2706	0.8493	2.6672	0.4357	1.0416	2.5117	0.7579	1.5342	0.604	2.1923	0.9584	0.1226	0.2117	0.5044	0.1224	0.2108
147	3-(4-hydroxyphenyl)lactate	Amino Acid	Tyrosine Metabolism	32197	LC/MS Neg	240	1379	181.051	6482-98-0	9378	9010	C03672	HMDB00755	1.5742	1.9243	2.0965	2.7719	2.3495	1.8413	1.2507	1.5822	1.1486	1	0.6097	0.8791	0.7989	0.9189	0.5099	0.2211	0.115	0.3215	0.115	0.2861
2573	3-hydroxy-3-methylglutarate	Lipid	Mevalonate Metabolism	531	LC/MS Polar	112	2850	161.046	503-49-1	1662	4573695	C03761	HMDB00355	1.9066	2.0459	2.5658	2.9633	2.6276	1.4231	1.3747	1.3856	1.0351	0.9925	0.7257	0.9758	0.8795	1.0075	0.6017	0.2703	0.2239	0.366	0.2143	0.2856
1560	3-hydroxydecanoate	Lipid	Fatty Acid, Monohydroxy	22053	LC/MS Neg	100000997	4634.7	187.134	5561-87-5	26612	24790		HMDB02203	5.8056	4.4075	4.6642	6.1183	4.3452	0.5605	1.3138	0.5784	0.5605	0.5605	0.5605	0.5605	1	0.625	0.8204	0.5605	0.5605	0.866	0.5605	0.6085
1562	3-hydroxylaurate	Lipid	Fatty Acid, Monohydroxy	32457	LC/MS Neg	100001112	5175	215.165	53941-38-1	94216	85026		HMDB00387	13.5247	9.4491	12.3046	20.3433	11.4041	3.0472	1.6173	1.2017	0.6031	0.9342	0.5371	0.6488	0.7953	0.5673	0.952	0.5371	0.5371	1	0.6449	0.5371
1564	3-hydroxymyristate	Lipid	Fatty Acid, Monohydroxy	21158	LC/MS Neg	100000882	5335	243.197	3422-31-9	16064	15252			10.5989	7.4773	11.0622	18.5752	10.2896	3.4938	2.3652	1.7789	0.8599	1.0029	0.7148	0.9971	0.9366	0.5014	0.6282	0.6197	0.6213	1.1323	0.7943	0.9565
1596	3-hydroxystearate	Lipid	Fatty Acid, Monohydroxy	52938	LC/MS Neg	100008933	5674	299.259	45261-96-9	5282907	4446034			0.8868	0.986	0.9144	0.9868	1.2091	0.8242	1.1729	1.0921	0.9888	1.0753	0.7732	0.9397	0.8302	0.7485	1.1151	1.0733	1.4131	1.3926	1.0112	1.2262
3540	3-methylcytidine	Nucleotide	Pyrimidine Metabolism, Cytidine containing	35132	LC/MS Pos Early	100001466	2176	258.108	21028-20-6	159649	9164190			1.7441	0.6259	4.5065	4.2526	0.833	1.3069	0.2711	1.167	0.2279	0.0921	0.0921	0.0921	0.0921	0.0921	0.0921	0.0921	0.0921	0.0921	0.0921	0.0921
67	3-methylhistidine	Amino Acid	Histidine Metabolism	15677	LC/MS Pos Early	100000042	2670	170.092	368-16-1	64969	58494	C01152	HMDB00479	1.0687	0.8707	2.1602	1.8208	1.9737	1.5383	0.9313	0.8592	0.708	0.5725	0.5725	0.5725	0.5725	0.5725	0.5725	0.5725	0.5725	0.5725	0.5725	0.5725
963	3-phosphoglycerate	Carbohydrate	Glycolysis, Gluconeogenesis, and Pyruvate Metabolism	1414	LC/MS Neg	132	583	184.986	80731-10-8	724	10669764	C00597	HMDB00807	0.5383	0.4299	0.9367	0.6996	0.3942	0.8194	1.1635	1.065	1.6263	1.2942	0.86	1.5577	1.4067	1.2091	0.9051	1.9302	0.9147	0.9401	1.0599	1.5242
435	4-guanidinobutanoate	Amino Acid	Guanidino and Acetamido Metabolism	15681	LC/MS Pos Early	100000096	2320	146.092	463-003;463-00-3	500	486	C01035	HMDB03464	1.561	1.348	1.8818	2.5358	2.1239	1.3403	1.1986	1.8683	0.8385	1.1615	0.4764	0.6153	0.5567	0.5483	0.3006	0.2016	0.2016	0.2311	0.7092	0.2016
455	4-hydroxy-nonenal-glutathione	Amino Acid	Glutathione Metabolism	48487	LC/MS Neg	100006240	3319.2	462.192	99927-70-5					1.2718	1.9484	1.1291	1.351	1.6418	0.5787	0.6471	0.3257	0.7185	0.6853	1.0911	1.1814	1.2827	1.1592	0.6369	0.894	0.5029	1.496	0.557	0.9089
85	4-imidazoleacetate	Amino Acid	Histidine Metabolism	32349	LC/MS Pos Early	100001207	2055	127.05	645-65-8	96215	86856	C02835	HMDB02024	2.0963	0.6746	1.4601	1.3697	0.8003	1.6137	0.8241	1.966	1.6227	1.0404	0.2516	1.0261	1	0.8531	0.5964	0.7654	0.2516	1.0636	0.5436	0.5966
3511	5,6-dihydrouridine	Nucleotide	Pyrimidine Metabolism, Uracil containing	61833	LC/MS Neg	100001425	1119	245.078	5627-05-04	94312	85115			3.0634	2.9773	4.1202	4.8103	2.9298	1.0877	1.5722	0.7425	0.6328	1	0.0871	0.2267	0.1094	0.3142	0.2904	0.0871	0.0871	0.0871	0.0871	0.0871
101	5-(galactosylhydroxy)-L-lysine	Amino Acid	Lysine Metabolism	43582	LC/MS Pos Early	100002462	2755	325.161	32448-36-5					2.0964	1.8777	2.0945	2.0241	1.9218	1.9625	1.4111	1.5442	1.6276	1.6692	0.2685	0.3011	0.3821	0.3126	0.3206	0.5441	0.4877	0.5484	0.5746	0.5889
3550	5-methyl-2'-deoxycytidine	Nucleotide	Pyrimidine Metabolism, Cytidine containing	38159	LC/MS Pos Early	100002300	2303	242.114	838-07-3	440055	389065	C03592	HMDB02224	0.7074	2.9028	0.9227	1.0011	2.2983	0.2066	1.1101	0.2066	0.2066	1.2404	0.9603	0.9989	0.4884	1.0131	0.8888	0.2066	1.0329	1.9578	0.2066	0.6722
3541	5-methylcytidine	Nucleotide	Pyrimidine Metabolism, Cytidine containing	22119	LC/MS Pos Early	100000763	2227	258.108	2140-61-6	92918	83877		HMDB00982	5.6238	2.7099	12.868	12.4299	3.1642	4.1424	1.304	4.016	1	0.7063	0.1809	0.1809	0.509	0.2512	0.1809	0.4646	0.1809	0.2874	0.1889	0.3436
425	5-methylthioadenosine (MTA)	Amino Acid	Polyamine Metabolism	1419	LC/MS Pos Early	212	2752	298.097	2457-80-9	439176	388321	C00170	HMDB01173	1.605	1.9432	1.8568	2.1061	2.618	1.5015	1.3002	1.0887	1.0511	1.2029	0.6502	0.8793	0.8682	0.9489	0.5944	0.3618	0.2812	0.5078	0.2947	0.4146
3513	5-methyluridine (ribothymidine)	Nucleotide	Pyrimidine Metabolism, Uracil containing	35136	LC/MS Neg	100001446	1778.1	257.078	1463-10-1	445408	393058		HMDB00884	1	1.3291	2.7714	3.2579	1.7888	0.3411	0.2295	0.319	0.1737	0.1737	0.1737	0.1737	0.1737	0.1737	0.1737	0.1737	0.1737	0.1737	0.1737	0.1737
447	5-oxoproline	Amino Acid	Glutathione Metabolism	1494	LC/MS Neg	1021	738.5	128.035	98-79-3	7405	7127	C01879	HMDB00267	2.5971	2.694	2.6346	3.6631	3.7762	1.819	1.311	1.8021	1.1975	1.3285	0.5764	0.7259	0.6509	0.6374	0.5169	0.5741	0.4796	0.8025	0.4919	0.6332
972	6-phosphogluconate	Carbohydrate	Pentose Phosphate Pathway	15442	LC/MS Neg	100000341	583.9	275.017	921-62-0;53411-70-4	91493	82615	C00345	HMDB01316	1.5966	2.1992	0.9883	1.1632	2.6095	0.532	0.8694	0.5168	0.7552	0.6831	1.6325	5.1578	2.902	3.7564	1.1751	0.6866	0.4819	0.8717	0.3323	1.0117
2590	7-dehydrocholesterol	Lipid	Sterol	1099	LC/MS Pos Late	264	2467	367.336	434-16-2	439423	388534	C01164	HMDB00032	0.1067	0.101	0.1298	0.1186	0.1176	0.0592	0.0667	0.0673	0.0681	0.0722	1.8702	2.0675	2.1427	2.0514	2.12	3.0744	2.6566	3.6473	3.1407	3.189
2632	7-hydroxycholesterol (alpha or beta)	Lipid	Sterol	47890	LC/MS Pos Late	100005999	1930	367.336		107722			HMDB06119	0.8009	0.8386	0.942	0.8747	0.8962	0.443	0.4524	0.5213	0.4674	0.4731	1.1385	1.1869	1.2074	1.1947	1.2289	1.1581	1.058	1.4076	1.2016	1.1476
3477	7-methylguanine	Nucleotide	Purine Metabolism, Guanine containing	35114	LC/MS Pos Early	100001456	2175	166.072	578-76-7	11361	10883	C02242	HMDB00897	5.938	4.2166	11.6407	11.5228	4.6876	2.2085	2.0958	1.9547	1.1661	1.6943	0.2968	0.7915	0.6081	0.8339	0.6043	0.3974	0.2776	0.7101	0.2722	0.468
1459	acetylcarnitine (C2)	Lipid	Fatty Acid Metabolism(Acyl Carnitine)	32198	LC/MS Pos Early	100000802	2282	204.123	5080-50-2	1	5406074	C02571	HMDB00201	0.983	0.8858	0.8256	1.1041	1.5294	1.6289	1.1868	1.7159	1.2713	1.7609	0.9716	1.3076	1.017	1.1712	0.809	0.285	0.2419	0.4027	0.2587	0.404
1166	acetylphosphate	Energy	Oxidative Phosphorylation	15488	LC/MS Polar	1211	4013.9	138.98	94249-01-1	186	181	C00227	HMDB01494	1.7297	1.6678	1.6596	1.5847	1.703	0.9935	0.9003	1.0495	1.3123	0.8493	1.0065	1.1628	0.9043	1.105	0.6306	0.7325	0.5914	0.6042	0.4411	0.5943
1145	aconitate [cis or trans]	Energy	TCA Cycle	46173	LC/MS Neg	100001359	580	173.009						0.1424	0.6224	0.0652	0.0745	0.3906	0.212	0.3762	0.1119	0.1593	0.5058	2.7557	1.7559	1.3776	1.912	2.3352	1.4126	2.0152	1.961	1.4378	1.5801
3441	adenine	Nucleotide	Purine Metabolism, Adenine containing	554	LC/MS Pos Early	880	2221	136.062	73-24-5	190	185	C00147	HMDB00034	5.5282	4.6105	4.9752	4.7001	4.0725	0.6074	0.8158	0.5538	0.5091	0.9915	0.4639	0.5733	1.0687	0.5193	1.0989	1.0085	1.1083	0.4543	1.4928	0.4095
3440	adenosine	Nucleotide	Purine Metabolism, Adenine containing	555	LC/MS Pos Early	798	2169	268.104	58-61-7	60961	54923	C00212	HMDB00050	1.1979	0.8472	1.0545	1.0029	1.0151	1.1005	0.6958	0.6477	0.6504	0.6119	0.5483	0.7185	0.8774	0.7591	1.0834	0.9971	1.1504	1.1407	1.1488	1.0316
3435	adenosine 2'-monophosphate (2'-AMP)	Nucleotide	Purine Metabolism, Adenine containing	36815	LC/MS Neg	100001694	1497.7	346.056	130-49-4	94136		C00946	HMDB11617	0.4536	3.5132	0.1219	0.3078	3.5274	0.1956	7.1279	0.1416	1.9521	8.0722	0.3194	0.2055	0.1219	0.1877	0.1219	0.1219	3.0275	2.7504	0.1219	1.5464
3438	adenosine 3',5'-diphosphate	Nucleotide	Purine Metabolism, Adenine containing	15691	LC/MS Neg	1214	575	426.022	75431-54-8	159296	19951095	C00054	HMDB00061	1.1053	3.3133	0.5079	0.6529	2.8715	1	1.5547	0.9222	1.2016	1	0.1181	0.1181	0.1181	0.1181	0.1181	0.1181	0.1181	0.3958	0.1181	0.4844
3434	adenosine 3'-monophosphate (3'-AMP)	Nucleotide	Purine Metabolism, Adenine containing	35142	LC/MS Neg	100001449	1245	346.056	84-21-9	41211	10463793	C01367	HMDB03540	0.0516	0.2465	0.0516	0.0516	0.1459	0.0516	4.9498	0.0516	1.1031	6.2688	1	0.3429	0.0516	0.4376	0.3037	0.0516	6.3161	4.0023	0.0516	1.5295
3606	adenosine 5'-diphosphoribose (ADP-ribose)	Cofactors and Vitamins	Nicotinate and Nicotinamide Metabolism	558	LC/MS Neg	215	920	558.064	68414-18-6	192	3674071	C00301	HMDB01178	1	1.1728	0.442	0.4393	1.8141	0.1743	1.6408	0.0613	1.6657	2.1153	1.1429	1.3783	0.8931	1.7133	1.122	0.1596	0.3946	0.6423	0.0613	0.5266
3433	adenosine 5'-monophosphate (AMP)	Nucleotide	Purine Metabolism, Adenine containing	32342	LC/MS Pos Early	209	1013	348.07	149022-20-8	6083	10239183	C00020	HMDB00045	1.425	1.4248	1.6138	1.9273	1.5946	1.1695	2.0982	0.729	0.9803	2.3269	0.358	0.307	0.2383	0.452	0.366	0.1765	1.2505	1.0197	0.1733	0.5212
28	alanine	Amino Acid	Alanine and Aspartate Metabolism	1126	LC/MS Pos Early	811	1700	90.055	56-41-7	5950	5735	C00041	HMDB00161	1.0666	1.1037	1.0121	1.0869	1.1965	1.1247	1.2211	1.4065	1.4457	1.1443	0.5027	0.605	0.5845	0.6108	0.5768	0.9879	0.4388	0.7954	0.7611	0.8904
490	alanylleucine	Peptide	Dipeptide	37093	LC/MS Pos Early	100001890	3055	203.139	1638-60-4	259583	227831		HMDB28691	0.0991	0.0991	0.0991	0.0991	0.0991	0.0991	0.0991	0.0991	0.1194	0.0991	4.1932	0.0991	0.0991	0.0991	0.2441	0.5087	25.758	15.7418	1	1.2507
3427	allantoin	Nucleotide	Purine Metabolism, (Hypo)Xanthine/Inosine containing	1107	LC/MS Polar	1002	1672	157.037	97-59-6	204	199	C02350	HMDB00462	2.252	2.2678	3.5033	4.1229	3.0605	1.2768	1.0773	1.3903	1.0459	0.9541	0.4954	1.0503	0.8497	0.6503	0.5325	0.4529	0.4006	0.7772	0.3884	0.5709
43	alpha-ketoglutaramate*	Amino Acid	Glutamate Metabolism	62101	LC/MS Polar	100002397	1916	144.03	18465-19-5					1.5096	1.6956	1.6144	2.0478	2.1576	0.6978	1.2395	1.1048	1.1454	1.1831	0.4945	0.8952	0.7796	0.7762	0.4945	0.6087	0.4945	0.7769	0.585	0.6401
1149	alpha-ketoglutarate	Energy	TCA Cycle	528	LC/MS Polar	93	2700	145.014	305-72-6;328-50-7;22202-68-2	51	50	C00026	HMDB00208	2.4423	2.7159	2.9457	3.652	3.9252	1.06	0.94	1.2399	0.7354	0.4945	0.8889	1.3245	1.1264	1.1043	0.9006	0.6476	0.3204	0.4604	0.4303	0.3759
3631	alpha-tocopherol	Cofactors and Vitamins	Tocopherol Metabolism	1561	LC/MS Pos Late	1105	2522	430.378	59-02-9;10191-41-0	14985	14265	C02477	HMDB01893	1.2147	1	1.7153	1.247	1.5354	1.4184	1.1886	1.3699	1.2154	1.3287	0.5781	0.6702	0.7539	0.7064	0.5217	0.2882	0.2134	0.2425	0.3485	0.2134
1006	arabitol/xylitol	Carbohydrate	Pentose Metabolism	48885	LC/MS Polar	100006430	1932.4	151.061		6912		C01904		1.0951	1.0051	2.0415	1.9158	1.7236	1	0.8169	1.0523	0.5887	0.2259	0.2259	0.654	0.5821	0.2259	0.3707	0.2259	0.2259	0.2259	0.2259	0.2259
1495	arachidoylcarnitine (C20)*	Lipid	Fatty Acid Metabolism(Acyl Carnitine)	57513	LC/MS Pos Late	100015833	1512	456.405			28639199		HMDB06460	0.5483	0.5214	0.6955	0.5731	0.8685	0.7376	0.7004	0.8999	0.742	0.5214	1.0946	1.4378	1.3267	1.5055	1.2229	1.5152	1	2.0607	1.8217	1.5326
368	arginine	Amino Acid	Urea cycle; Arginine and Proline Metabolism	1638	LC/MS Pos Early	231	2825	175.119	1119-34-2	232	227	C00062	HMDB00517	1.095	1.0982	0.9968	0.9691	1.1389	1.243	1.181	1.5113	1.5242	1.2086	0.584	0.5564	0.6095	0.5534	0.6053	1.1431	0.7323	1.0032	0.9084	0.9444
369	argininosuccinate	Amino Acid	Urea cycle; Arginine and Proline Metabolism	15497	LC/MS Pos Early	232	2745	291.13	156637-58-0	828	805	C03406	HMDB00052	5.8222	5.2782	4.5008	6.3123	9.3369	1.2698	0.5758	1.2904	0.5128	0.3887	0.2065	0.6545	0.7302	0.6504	0.2065	0.2065	0.2065	0.2065	0.2065	0.2065
38	asparagine	Amino Acid	Alanine and Aspartate Metabolism	512	LC/MS Pos Early	917	1225	133.061	70-47-3	6267	6031	C00152	HMDB00168	1.5394	1.5418	1.2195	1.4994	1.53	1.2408	1.4385	1.3735	1.6139	1.3961	0.3232	0.5123	0.5609	0.4767	0.4509	0.7805	0.3263	0.4714	0.4853	0.5673
34	aspartate	Amino Acid	Alanine and Aspartate Metabolism	443	LC/MS Pos Early	234	1165	134.045	56-84-8	5960	5745	C00049	HMDB00191	2.5543	2.0641	3.0875	3.2528	2.5247	0.826	0.6179	1.0078	0.8234	0.58	1.0545	1.5431	1.4749	1.4011	0.9922	0.8561	0.5041	0.7717	0.6328	0.7479
3732	benzoate	Xenobiotics	Benzoate Metabolism	15778	LC/MS Neg	100000008	1750	121.029	65-85-0	243	238	C00180	HMDB01870	0.7857	0.6866	0.7655	0.6866	1.0504	0.6866	1.1618	1.0678	1.0905	0.6866	0.6866	0.6866	0.6866	0.6866	1.1523	1.1527	0.6866	0.8748	0.9496	0.8746
3528	beta-alanine	Nucleotide	Pyrimidine Metabolism, Uracil containing	55	LC/MS Pos Early	244	1905	90.055	56-41-7;107-95-9	239	234	C00099	HMDB00056	1.1961	1.1197	1.3612	1.558	1.5931	1.0061	0.9131	1.155	0.9939	1.0732	0.9252	1.1151	1.0945	0.7899	0.8585	0.7088	0.4308	0.7287	0.6659	0.7847
278	beta-hydroxyisovalerate	Amino Acid	Leucine, Isoleucine and Valine Metabolism	12129	LC/MS Polar	1442	1149.8	117.056	625-08-1	69362	62571		HMDB00754	0.6645	0.838	0.8261	1.0199	1	1.8922	1.0455	2.1231	1.1694	0.8092	0.2985	0.2985	0.2985	0.2985	0.2985	0.2985	0.2985	0.2985	0.2985	0.2985
6	betaine	Amino Acid	Glycine, Serine and Threonine Metabolism	3141	LC/MS Pos Early	799	1064	118.086	107-43-7	247	24219951173	C00719	HMDB00043	1.0328	1.1127	1.4817	1.7116	1.6174	0.7768	0.865	0.7184	0.5898	0.5721	3.0815	4.402	3.4762	3.692	2.3847	0.9024	0.398	0.9672	0.5323	0.8966
3676	bilirubin (Z,Z)	Cofactors and Vitamins	Hemoglobin and Porphyrin Metabolism	43807	LC/MS Pos Late	1090	1840	585.271	635-65-4	5280352	4444055	C00486	HMDB00054	0.5599	0.5918	0.6864	0.739	0.6418	0.9486	0.9279	0.5599	0.9986	1.0426	1.1799	0.9498	1	1.1393	1.0328	1.6338	1.27	1.7272	1.1694	1.3335
3655	biotin	Cofactors and Vitamins	Biotin Metabolism	568	LC/MS Pos Early	251	2253	245.095	58-85-5	171548	149962	C00120	HMDB00030	1.0611	0.8206	1.0458	1	1.1257	0.0708	0.0708	0.1167	0.0708	0.0708	0.0708	0.0708	0.0708	0.0708	0.0708	0.0708	0.0708	0.0708	0.0708	0.0708
216	C-glycosyltryptophan	Amino Acid	Tryptophan Metabolism	48782	LC/MS Neg	100006379	1777	365.135	180509-18-6	10981970	9157171			0.784	0.7968	0.966	1.081	1.0527	0.6702	0.6275	0.8434	0.5848	0.5848	0.8749	1.1935	1.1443	1.3535	1	1.1076	0.8191	1.349	1.3655	1.2329
2615	campesterol	Lipid	Sterol	33997	LC/MS Pos Late	100001269	2873	383.367	474-62-4	173183	151215	C01789	HMDB02869	1	0.7345	1.1753	1.6622	0.7345	0.7345	0.7345	0.7345	0.7345	0.7345	0.7345	0.7345	0.7345	0.7345	0.7345	0.7345	0.7345	0.9747	0.7345	0.7345
1520	carnitine	Lipid	Carnitine Metabolism	15500	LC/MS Pos Early	100000007	1978	162.112	461-05-2	10917	10455	C00318	HMDB00062	2.0131	2.5358	2.1296	2.8444	3.2501	1.4169	1.6052	1.4368	1.2571	1.3581	0.4498	0.7429	0.7266	0.6451	0.4704	0.2677	0.1622	0.3442	0.2847	0.3112
1512	cerotoylcarnitine (C26)*	Lipid	Fatty Acid Metabolism(Acyl Carnitine)	57516	LC/MS Pos Late	100015835	1649	540.499			35015992		HMDB06347	1.1805	1.212	1	0.5628	1.4497	0.5628	0.8238	0.9119	0.9501	0.9195	0.9497	1.0291	1.087	1.0701	1.001	0.9669	0.9435	1.2012	0.8195	1.004
2588	cholesterol	Lipid	Sterol	63	LC/MS Pos Late	266	2707	369.352	57-88-5	11025495	4937803	C00187	HMDB00067	0.9863	1.0703	1.2049	1.0137	1.0854	1.0782	1.0499	1.2063	1.4172	1.1263	0.7597	0.8562	0.8863	0.7729	0.8147	0.9319	0.8545	1.0495	0.869	0.9395
1760	choline	Lipid	Phospholipid Metabolism	15506	LC/MS Pos Early	1256	1961	104.107	67-48-1	305	149278	C00114	HMDB00097	1.6181	1.0003	2.4571	2.5317	1.2843	1.4969	0.5287	1.3328	0.7171	0.423	0.7952	1.1615	1.3408	1.048	0.9997	0.7951	0.4751	0.7434	0.741	0.699
1761	choline phosphate	Lipid	Phospholipid Metabolism	34396	LC/MS Pos Early	267	700	184.073	72556-74-2	1014	119298	C00588	HMDB01565	1.4441	1.5349	1.601	1.8059	1.6749	0.9976	1.0624	0.8121	0.8975	0.8722	1.0024	1.3365	1.1323	1.172	0.8744	0.7221	0.5211	0.8057	0.4885	0.7456
1143	citrate	Energy	TCA Cycle	1564	LC/MS Neg	1124	582	191.02	77-92-9	311	305	C00158	HMDB00094	0.2366	0.6584	0.1324	0.1423	0.4977	0.244	0.33	0.1371	0.1721	0.4312	2.1802	1.5044	1.405	1.5335	1.9076	1.3416	1.746	1.7515	1.3481	1.4298
376	citrulline	Amino Acid	Urea cycle; Arginine and Proline Metabolism	2132	LC/MS Pos Early	391	1520	176.103	372-75-8	9750	810	C00327	HMDB00904	0.9087	0.767	1.1509	1.2283	1.0401	1.2641	0.7509	1.21	0.9599	0.6957	0.3657	0.682	1.1052	0.5857	0.4958	3.804	0.5257	1.0728	2.2791	1.6934
457	CoA-glutathione*	Amino Acid	Glutathione Metabolism	62804	LC/MS Neg	269	1326	535.084	6477-52-7	11953788	10128089	C00920		5.3744	8.8211	8.2275	9.131	10.4574	0.9525	3.3672	0.7031	1	3.0329	0.323	0.7834	0.323	0.6033	0.323	0.323	0.323	0.4164	0.323	0.4219
3617	coenzyme A	Cofactors and Vitamins	Pantothenate and CoA Metabolism	46322	LC/MS Neg	270	1448	382.55	85-61-0;18439-24-2	317	311	C00010	HMDB01423	2.7212	5.732	3.2969	3.6731	5.7463	1.2853	3.4772	0.8118	1.2508	2.3196	0.3508	1	0.5797	0.879	0.2242	0.1911	0.1036	0.262	0.1036	0.4853
407	creatine	Amino Acid	Creatine Metabolism	27718	LC/MS Pos Early	1221	1947	132.077	57-00-1	586	566	C00300	HMDB00064	2.1305	2.3481	2.2313	2.433	2.6786	1.4933	1.5159	1.4172	1.2881	1.2549	0.555	0.7451	0.6883	0.7009	0.4819	0.3668	0.1984	0.4247	0.2734	0.3824
409	creatine phosphate	Amino Acid	Creatine Metabolism	33951	LC/MS Neg	100000112	603	210.029	922-32-7	587	567	C02305	HMDB01511	0.4907	0.4907	0.51	0.4907	0.4907	0.8316	0.7408	0.7946	0.6425	1.2759	1.4386	2.4711	1.614	2.1913	0.8328	1.1672	0.6268	1.5586	0.4907	1.514
408	creatinine	Amino Acid	Creatine Metabolism	513	LC/MS Pos Early	275	2055	114.066	60-27-5	588	568	C00791	HMDB00562	2.4907	2.9266	3.1988	3.086	2.7025	1.6068	1.1712	1.5329	1.289	1.1495	0.5626	0.8505	0.772	0.7994	0.4892	0.6138	0.2684	0.6331	0.3919	0.5371
348	cysteine	Amino Acid	Methionine, Cysteine, SAM and Taurine Metabolism	1868	LC/MS Pos Early	800	1488	122.027	52-90-4;56-89-3	5862	5653	C00097	HMDB00574	1.0846	1.4479	1.2492	1.1279	1.304	1.0691	1.2855	1.2558	1.3615	1.4616	0.9105	0.8327	0.9035	0.9309	0.8941	0.7764	0.4369	0.6815	0.6992	0.8017
441	cysteine-glutathione disulfide	Amino Acid	Glutathione Metabolism	35159	LC/MS Pos Early	100001437	2465	427.095	13081-14-6	4247235	3455404		HMDB00656	0.8179	0.6458	1.1222	0.923	0.6489	1.095	1.0864	1.4079	1.2911	1.2716	0.5957	0.3081	0.492	0.3459	0.5587	0.9879	1.1723	1.3022	1.0257	1.0121
444	cysteinylglycine	Amino Acid	Glutathione Metabolism	35637	LC/MS Pos Early	278	2132	179.048	19246-18-5	439498	58762	C01419	HMDB00078	0.9507	1.5976	1.7057	1.0888	1.663	0.2131	0.2131	0.2131	0.2131	0.2131	2.0876	1.0705	0.5977	0.9369	0.9694	0.2131	0.8903	1	0.2131	0.2131
3538	cytidine	Nucleotide	Pyrimidine Metabolism, Cytidine containing	514	LC/MS Pos Early	827	2124	244.093	65-46-3	6175	5940	C00475	HMDB00089	1.5183	1.4328	1.5482	1.6001	1.4522	1.9848	1.5558	2.1696	1.6249	1.1746	0.6217	0.6817	0.786	0.6586	0.6531	0.8254	0.5075	0.7624	0.5509	0.7459
1762	cytidine 5'-diphosphocholine	Lipid	Phospholipid Metabolism	34418	LC/MS Polar	1220	4200	533.106	33818-15-4	13804	21531769	C00307	HMDB01413	1	1.4468	1.6357	1.8106	1.9056	0.189	0.189	0.189	0.189	0.189	0.189	0.4405	0.2384	0.3719	0.189	0.189	0.189	0.189	0.189	0.189
3534	cytidine 5'-monophosphate (5'-CMP)	Nucleotide	Pyrimidine Metabolism, Cytidine containing	2372	LC/MS Pos Early	282	835	324.059	63-37-6	6131	5414497	C00055	HMDB00095	1.4718	1.4615	1.7456	2.1301	1.5538	1.2776	0.7414	1.0127	0.7137	0.6915	0.9498	1.2755	1.2263	1.2856	0.9873	0.8855	0.457	0.7561	0.6988	0.6877
1102	cytidine 5'-monophospho-N-acetylneuraminic acid	Carbohydrate	Nucleotide Sugar	36831	LC/MS Polar	1223	3900	613.14	3063-71-6	448209		C00128	HMDB01176	1.2027	1.1541	0.952	0.6207	0.3907	0.3907	0.3907	0.3907	0.5376	0.3907	0.9917	1.1511	0.3907	0.3907	0.3907	0.3907	1.134	1.5053	0.8229	1.0083
3533	cytidine diphosphate	Nucleotide	Pyrimidine Metabolism, Cytidine containing	2841	LC/MS Neg	280	580	402.011	34393-59-4	6132	5902	C00112	HMDB01546	1.3984	1.2472	1.2644	1.3805	1.3638	0.3533	0.6367	0.2033	0.2701	0.7528	0.2033	0.2033	0.2033	0.2033	0.2033	0.2033	0.2033	0.2033	0.2033	0.2033
3539	cytosine	Nucleotide	Pyrimidine Metabolism, Cytidine containing	573	LC/MS Pos Early	881	2060	112.051	71-30-7	597	577	C00380	HMDB00630	1	1.1057	1.2103	0.6242	0.6242	1.0321	1.1163	1.5878	0.8295	1.0642	0.6242	0.6242	0.7046	0.7786	1.2506	0.7198	0.6242	0.6242	0.9668	0.8226
1519	deoxycarnitine	Lipid	Carnitine Metabolism	36747	LC/MS Pos Early	100001662	2052	146.118	6249-56-5	134	705	C01181	HMDB01161	1.6326	1.1384	1.5179	1.9583	2.4313	0.881	0.8646	1	0.5959	0.8329	0.8019	1.2437	1.3457	1.15	1.0174	0.35	0.2176	0.5238	0.2176	0.4973
958	dihydroxyacetone phosphate (DHAP)	Carbohydrate	Glycolysis, Gluconeogenesis, and Pyruvate Metabolism	15522	LC/MS Pos Early	309	539	171.005	102783-56-2	668	3833110	C00111	HMDB01473	2.6275	2.6158	3.8384	3.9195	2.4202	1.6949	1.6832	1.6602	1.9918	1.2489	0.1368	0.4953	0.3818	0.4237	0.3764	0.6808	0.4272	0.6384	0.4795	0.7511
382	dimethylarginine (SDMA + ADMA)	Amino Acid	Urea cycle; Arginine and Proline Metabolism	36808	LC/MS Pos Early	100001810	2850	203.15	102783-24-4	123831	110375	C03626	HMDB01539	1.5138	1.3323	1.2454	1.3172	1.5638	1.4391	1.6161	1.67	2.0034	1.5383	0.1201	0.1843	0.2486	0.1535	0.2019	0.7546	0.1761	0.309	0.3703	0.4322
1355	dodecanedioate (C12-DC)	Lipid	Fatty Acid, Dicarboxylate	32388	LC/MS Neg	100001102	2990	229.145	693-23-2	12736	12213	C02678	HMDB00623	1.0258	1.2495	0.6538	0.7922	1.097	1.2278	1.719	0.6046	0.4117	0.5552	0.5364	0.89	0.7203	1.4251	1.7623	0.9742	0.9441	1.1715	1.4423	1.3185
2567	eicosanoylsphingosine (d20:1)*	Lipid	Sphingosines	57597	LC/MS Pos Late	100015870	1443	328.321						0.8848	0.8983	0.9806	0.879	1.0194	0.585	0.657	0.6344	0.7164	0.771	1.0527	1.042	1.0611	0.9747	1.0225	1.3525	1.1848	1.59	1.4796	1.5486
1391	eicosenamide (20:1)*	Lipid	Fatty Acid, Amide	62445	LC/MS Pos Late	100020764	1800	310.31		5365374	4517402			0.8548	1.1235	1.3497	0.9217	1.1846	0.7686	0.863	0.9993	1.1168	1.9466	1.1139	0.8723	0.9497	0.8096	0.8674	1.0248	3.0813	1.0007	1.1172	0.9925
1502	eicosenoylcarnitine (C20:1)*	Lipid	Fatty Acid Metabolism(Acyl Carnitine)	57519	LC/MS Pos Late	100015838	1484	454.389						0.9716	0.644	1.098	0.6657	1.0689	0.8	0.8132	0.864	0.9399	1.3624	1	1.1193	0.6946	1.2936	0.644	1.2263	0.7559	1.3746	1.3036	1.097
4037	ergothioneine	Xenobiotics	Food Component/Plant	37459	LC/MS Pos Early	100002154	850	230.096	58511-63-0	3032311	2297320	C05570	HMDB03045	1.0136	1.1483	1.5789	3.5949	1.6006	1.1088	0.9827	0.3924	0.4963	1.1154	0.5494	0.8555	1	0.5062	0.4507	0.3924	0.3924	0.3924	0.3924	0.3924
1393	erucamide	Lipid	Fatty Acid, Amide	35177	LC/MS Pos Late	100001444	1972	338.342	112-84-5	5365371	4517399			0.8293	1.3125	2.0394	1.528	2.0015	0.7934	1.0326	1.4139	1.3936	2.0581	1.0874	0.6892	0.8576	0.4756	0.7266	0.7377	2.7969	0.615	0.9674	0.9518
1136	erythronate*	Carbohydrate	Aminosugar Metabolism	42420	LC/MS Polar	100001320	2186	135.03	88759-55-1	2781043	2061231		HMDB00613	2.981	3.073	4.755	5.2949	4.7748	1.2909	1.3009	1.3901	0.9337	0.9971	0.6333	1.1174	1.0029	0.7999	0.725	0.3468	0.2872	0.5998	0.3642	0.396
309	ethylmalonate	Amino Acid	Leucine, Isoleucine and Valine Metabolism	15765	LC/MS Polar	2054	2785	131.035	601-75-2	11756	11263		HMDB00622	1.5068	1.2688	1.5263	1.791	2.08	0.699	0.7312	0.5805	0.5703	0.6077	0.5703	0.5703	0.5703	0.5703	0.5703	0.5703	0.5703	0.5703	0.5703	0.5703
3610	flavin adenine dinucleotide (FAD)	Cofactors and Vitamins	Riboflavin Metabolism	2134	LC/MS Neg	327	2425	784.15	146-14-5;84366-81-4	643975	559059	C00016	HMDB01248	1.6071	1.6944	1.7135	1.8046	1.7919	1.437	1.1862	1.1799	1.1797	1.1915	0.5697	0.8203	0.7297	0.7448	0.7141	0.5388	0.4264	0.7107	0.5946	0.5892
3611	flavin mononucleotide (FMN)	Cofactors and Vitamins	Riboflavin Metabolism	15797	LC/MS Neg	100000251	2390	455.097	130-40-5	710	690	C00061	HMDB01520	6.6178	5.4005	7.9282	7.6968	6.3507	1.7036	1.2973	1.2413	0.9386	0.9367	0.5876	1	1.1172	0.9632	0.5031	0.7792	0.5031	0.9099	0.9736	0.8268
1059	fructose	Carbohydrate	Fructose, Mannose and Galactose Metabolism	48195	LC/MS Polar	878	2065	225.062	57-48-7	5984	5764	C00095	HMDB00660	2.1616	1.737	2.7317	2.2081	2.0331	2.3809	1.0203	2.8801	1.4637	0.9132	0.6096	0.8992	1.0868	0.7931	0.9797	0.6501	0.7328	0.5845	0.8904	0.6915
956	fructose 1,6-diphosphate/glucose 1,6-diphosphate/myo-inositol diphosphates	Carbohydrate	Glycolysis, Gluconeogenesis, and Pyruvate Metabolism	46896	LC/MS Neg	100002180	551	338.989				C00354		1.4825	2.3474	2.3675	2.6294	2.2955	1.9825	2.7602	1.558	2.2299	2.6356	0.2769	0.399	0.1998	0.3949	0.1701	0.3015	0.5175	0.4801	0.1936	0.4858
1153	fumarate	Energy	TCA Cycle	1643	LC/MS Polar	330	3084	115.004	100-17-8	444972	10197150	C00122	HMDB00134	4.1604	3.8213	4.7414	5.6791	5.5136	1.1408	0.7053	1.0423	0.5238	0.4357	0.9046	1.6598	1.5931	1.3936	0.9577	0.6756	0.305	0.7744	0.412	0.6567
1085	galactonate	Carbohydrate	Fructose, Mannose and Galactose Metabolism	27719	LC/MS Polar	100001026	3085	195.051	299-28-5	128869	114198	C00880	HMDB00565	1.2028	1.6882	2.6012	3.212	2.378	1.289	1	0.9175	0.6524	0.6046	0.2333	0.3111	0.2333	0.2333	0.5474	0.2333	0.2333	0.2333	0.2333	0.2333
470	gamma-glutamyl-epsilon-lysine	Peptide	Gamma-glutamyl Amino Acid	33934	LC/MS Pos Early	100001262	2725	276.155	17105-15-6	7015685	5378717		HMDB03869	0.6671	0.6414	0.7385	0.7446	0.861	0.5703	0.5518	0.5358	0.6001	0.8011	1.149	1.3443	1.4792	1.2576	1.139	2.4709	2.5547	2.8465	2.4007	2.5931
462	gamma-glutamylcysteine	Peptide	Gamma-glutamyl Amino Acid	1778	LC/MS Pos Early	1036	2118	251.07	636-58-8	842	819	C00669	HMDB01049	2.6911	3.4986	2.5753	2.9649	4.59	0.5678	0.7562	0.5604	0.7019	0.5122	1.2438	3.0536	3.0366	3.1955	1.5792	0.5448	0.064	0.4109	0.3911	0.4961
463	gamma-glutamylglutamate	Peptide	Gamma-glutamyl Amino Acid	36738	LC/MS Pos Early	331	1775	277.103	1116-22-9	92865	83831	C05282	HMDB11737	0.6742	0.5922	1.7574	1.8492	0.9771	1.3632	0.8194	1.3039	0.7002	0.6149	0.7492	1.3849	1.6183	1.2931	1.0669	0.8328	0.452	1.0229	0.8022	1.0305
464	gamma-glutamylglutamine	Peptide	Gamma-glutamyl Amino Acid	2730	LC/MS Pos Early	1140	1430	276.119	10148-81-9	150914	133013	C05283	HMDB11738	0.2818	0.2118	0.2118	0.2118	0.2774	0.5626	0.9417	1.2994	1.9735	0.7981	0.7235	1.3554	2.3984	1.0583	1.6437	2.2892	0.3669	0.6193	1.5899	1.2753
465	gamma-glutamylglycine	Peptide	Gamma-glutamyl Amino Acid	33949	LC/MS Pos Early	100001294	1535	205.082	1948-29-4	165527	145071		HMDB11667	0.1173	0.1173	0.3331	0.1173	0.1173	0.1173	0.1173	0.1256	0.1173	0.1173	1	1.8602	1.7719	1.6858	1.0839	0.1173	0.1173	0.1187	0.1173	0.1173
467	gamma-glutamylisoleucine*	Peptide	Gamma-glutamyl Amino Acid	34456	LC/MS Pos Early	100001485	2940	261.144		14253342	21403145		HMDB11170	0.8511	0.8941	1.1213	1	1.0324	0.3004	0.3004	0.3004	0.3004	0.3004	2.1863	4.6621	4.2492	4.8092	2.6407	0.8167	0.3004	0.9176	0.4984	0.8693
468	gamma-glutamylleucine	Peptide	Gamma-glutamyl Amino Acid	18369	LC/MS Neg	1268	1685	259.13	2566-39-4	151023	133115		HMDB11171	0.3704	0.5876	0.7437	0.7307	0.6775	0.3704	0.3704	0.3704	0.3704	0.3704	4.0132	6.7257	5.2704	5.89	3.3573	0.9621	0.3704	1.14	0.7718	1.0379
471	gamma-glutamylmethionine	Peptide	Gamma-glutamyl Amino Acid	44872	LC/MS Pos Early	100001313	2640	279.101	17663-87-5	7009567	5373147		HMDB29155	0.4309	0.4309	0.4309	0.4309	0.4309	0.9157	0.4309	1.5775	1.5366	0.4309	0.4309	0.613	0.989	0.4594	1.2831	2.9042	0.4309	0.4309	2.0078	1
473	gamma-glutamylthreonine	Peptide	Gamma-glutamyl Amino Acid	33364	LC/MS Pos Early	100001314	1750	249.108	5652-48-2	76078708	21403107		HMDB29159	0.5659	0.3815	0.6437	0.6434	0.6723	0.1622	0.1315	0.344	0.1883	0.1608	8.5149	14.5939	16.9239	16.6881	9.0053	2.8119	1.3277	3.0027	1.9636	3.2716
476	gamma-glutamylvaline	Peptide	Gamma-glutamyl Amino Acid	43829	LC/MS Pos Early	100001126	2700	247.129	2746-34-1	7015683			HMDB11172	0.2243	0.2243	0.2243	0.3113	0.2908	0.2243	0.2243	0.2243	0.2243	0.2243	1.4172	4.928	4.9614	5.5018	2.9544	0.9042	0.2243	0.2243	0.4598	1
3960	gluconate	Xenobiotics	Food Component/Plant	587	LC/MS Polar	338	2922	195.051	527-07-1	10690	10240	C00257	HMDB00625	1.4664	1.0943	1	1.0334	1.6937	0.688	0.3522	0.9933	0.4314	0.2447	1.2235	2.4674	3.1624	1.978	2.6139	0.4916	0.1756	0.1756	0.6734	0.4394
949	glucose	Carbohydrate	Glycolysis, Gluconeogenesis, and Pyruvate Metabolism	20488	LC/MS Polar	572	2342	179.056	50-99-7	79025	71358	C00031	HMDB00122	1.0472	0.6458	1.0015	0.9177	0.7162	0.9985	0.4617	1.2119	0.577	0.3447	0.9849	0.722	1.2348	0.5373	1.048	1.7876	2.486	2.3914	2.7117	1.6712
950	glucose 6-phosphate	Carbohydrate	Glycolysis, Gluconeogenesis, and Pyruvate Metabolism	31260	LC/MS Polar	291	4537	259.022	103192-55-8	5958	19952394	C00668	HMDB01401	3.794	3.8488	4.796	4.7537	6.7936	2.551	1.8834	2.8071	1.3047	1.2424	0.0954	0.7576	0.5338	0.547	0.2307	0.4396	0.1085	0.5625	0.2386	0.5108
1113	glucuronate	Carbohydrate	Aminosugar Metabolism	15443	LC/MS Polar	100000257	3233.3	193.035	207300-70-7	444791	58552	C00191	HMDB00127	1.8711	1.8598	3.1447	2.7978	2.1911	1.7646	0.8671	2.8418	1.0703	0.8108	0.8862	1.1193	1.1728	0.9257	0.9297	0.6208	0.5614	0.6958	0.8961	0.6421
41	glutamate	Amino Acid	Glutamate Metabolism	57	LC/MS Pos Early	561	1500	148.06	56-86-0	611	591	C00025	HMDB00148	1.8681	1.9858	2.0694	2.6124	2.5512	0.8541	0.6673	1.0072	0.8747	0.6235	1.1183	1.5854	1.5362	1.392	0.9928	0.8194	0.4678	0.8334	0.6603	0.715
50	glutamate, gamma-methyl ester	Amino Acid	Glutamate Metabolism	33487	LC/MS Pos Early	100001103	2170	162.076	1499-55-4;1499-55-4	68662	66546		HMDB61715	2.8816	2.5918	2.7049	3.1824	3.5058	1.6327	1.0557	1.1822	0.4421	0.8253	0.2889	0.8506	0.8714	1	1.3011	0.354	0.2889	0.3073	0.7104	0.3891
42	glutamine	Amino Acid	Glutamate Metabolism	53	LC/MS Pos Early	563	1291	147.076	56-85-9	5961	5746	C00064	HMDB00641	1.4309	1.7806	0.8053	0.9719	1.7897	0.4293	1.5108	0.6159	1.4424	1.8782	0.8346	1.0412	0.971	0.9389	0.8915	1.0962	0.6828	1.0281	0.5676	1.1602
1330	glutarate (C5-DC)	Lipid	Fatty Acid, Dicarboxylate	396	LC/MS Polar	339	2900	131.035	110-94-1	743	3618533	C00489	HMDB00661	1.3904	1.71	1.7355	1.8556	1.8083	0.7159	0.9029	1.0389	0.7448	0.6648	0.8155	1.4441	0.9887	0.9855	0.8379	1.0113	0.6648	0.6648	0.6648	0.6648
439	glutathione, oxidized (GSSG)	Amino Acid	Glutathione Metabolism	27727	LC/MS Pos Early	448	2667	613.159	103239-24-3	65359	58835	C00127	HMDB03337	4.8025	3.9098	6.0038	6.4517	4.9142	0.8062	0.777	0.7652	0.6195	0.9608	1.443	1.9794	1.5427	1.7792	0.8551	0.5989	0.3418	1.0392	0.3468	0.719
438	glutathione, reduced (GSH)	Amino Acid	Glutathione Metabolism	2127	LC/MS Pos Early	496	2000	308.091	70-18-8	124886	111188	C00051	HMDB00125	2.3154	2.8015	2.2345	2.7121	3.2978	0.5533	0.6163	0.4552	0.4416	0.3728	1.3837	2.3722	1.9432	2.1147	1.3939	0.5348	0.1402	0.3549	0.3519	0.4926
969	glycerate	Carbohydrate	Glycolysis, Gluconeogenesis, and Pyruvate Metabolism	1572	LC/MS Polar	1052	2070.4	105.019	600-19-1	752	732	C00258	HMDB00139	0.5387	0.5901	0.8164	0.566	0.3937	1.0709	0.9872	1.7567	1.207	0.9107	0.827	1.2312	1.8039	1.1032	1.814	1.8349	0.4086	0.5919	1.6254	1.0128
2315	glycerol	Lipid	Glycerolipid Metabolism	15122	LC/MS Neg	1254	758	91.0401	56-81-5	753	733	C00116	HMDB00131	1.3109	1.3003	1.6363	1.4081	1.2028	1.1099	1.438	1.7334	0.7184	0.5223	0.9288	1.0048	0.7702	0.9186	0.9952	1.0784	0.6339	0.6898	0.7272	0.9161
2316	glycerol 3-phosphate	Lipid	Glycerolipid Metabolism	43847	LC/MS Pos Early	100000258	580	173.021	29849-82-9	754	734	C00093	HMDB00126	1.9654	1.1022	2.9455	2.7833	1.4156	0.676	0.3169	0.6783	0.3999	0.3112	1.0479	1.9741	2.2446	2.0053	1.2539	0.8793	0.4198	0.8688	0.9521	0.7856
1768	glycerophosphoethanolamine	Lipid	Phospholipid Metabolism	37455	LC/MS Polar	100001620	3075	214.049	33049-08-0	123874	110410	C01233	HMDB00114	2.3694	2.142	3.3348	2.839	3.3735	2.0891	1.4301	2.5044	1.5438	1.3586	0.5065	0.6414	0.594	0.6267	0.5008	0.6386	0.5928	0.6153	0.6137	0.5202
2321	glycerophosphoglycerol	Lipid	Glycerolipid Metabolism	48857	LC/MS Polar	100001619	2430	245.043		439964	388990	C03274		1.7135	1.7839	2.2704	2.277	2.4705	1.0092	0.9408	1.073	0.7441	0.7783	0.8935	1.0709	0.9632	0.9396	0.86	0.8903	1.1185	1.3496	0.719	0.9908
1770	glycerophosphoinositol*	Lipid	Phospholipid Metabolism	47155	LC/MS Polar	100001621	3850	333.059	16824-65-0	167572				2.1245	2.2686	3.0224	2.6717	3.1073	1.7086	1.5533	1.6559	1.2433	1.4149	0.4584	0.702	0.7156	0.7567	0.6199	0.3897	0.3399	0.4315	0.2848	0.3825
1764	glycerophosphorylcholine (GPC)	Lipid	Phospholipid Metabolism	15990	LC/MS Pos Early	100000269	672	258.11	28319-77-9	71920	571409	C00670	HMDB00086	0.9369	0.7758	0.9481	0.7902	0.8042	1.4926	0.8952	1.614	1.144	0.8794	1.0252	1.1518	1.1961	1.1047	0.9748	1.1761	0.8913	1.0779	1.1025	0.9293
1769	glycerophosphoserine*	Lipid	Phospholipid Metabolism	57404	LC/MS Pos Early	100015666	577	260.053		3081457	2339060			1.1532	1.1116	1.3059	1.2694	1.2239	1.1589	0.6717	0.7263	0.9709	1.0324	0.7131	1.0291	1.0888	0.8955	0.8435	0.9187	0.6592	1.0717	0.7824	0.8742
1	glycine	Amino Acid	Glycine, Serine and Threonine Metabolism	58	LC/MS Pos Early	340	1375	76.0393	56-40-6	750	730	C00037	HMDB00123	1.8137	1.6481	1.7994	2.1843	1.9753	1.5793	1.3861	1.7874	1.6654	1.244	0.4351	0.6977	0.7173	0.6279	0.5328	0.756	0.3071	0.5237	0.4487	0.5526
2787	glycochenodeoxycholate	Lipid	Primary Bile Acid Metabolism	32346	LC/MS Neg	1628	5236.1	448.307	16564-43-5	12544		C05466	HMDB00637	0.445	0.445	0.445	0.445	0.445	1.807	1.0564	1.6414	2.229	1.4875	0.445	0.445	0.4755	0.4671	0.4705	0.6001	0.9436	1.4489	1.1596	0.8528
622	glycylleucine	Peptide	Dipeptide	34398	LC/MS Neg	100001258	1891	187.109	869-19-2	92843	83812	C02155	HMDB00759	0.1549	0.0975	0.0975	0.0975	0.2241	0.0975	0.3062	0.352	1.0869	1	2.181	0.5941	0.5146	0.5466	1.1269	2.1185	3.0241	3.5763	2.1664	2.4812
632	glycylvaline	Peptide	Dipeptide	18357	LC/MS Neg	100000487	1320	173.093	1963-21-9	97417	2006926		HMDB28854	0.314	0.314	0.314	0.314	0.314	0.314	0.4382	0.314	1.1732	1.0144	1.5622	0.314	0.314	0.314	0.314	0.5591	4.0922	3.5046	0.5831	0.9856
3475	guanine	Nucleotide	Purine Metabolism, Guanine containing	32352	LC/MS Pos Early	172	2032	152.057	73-40-5	764	744	C00242	HMDB00132	2.291	2.0514	2.6485	2.6743	2.1485	1.9237	1.6628	2.0154	1.4812	1.3469	0.4159	0.4172	0.5072	0.372	0.4797	0.2552	0.4801	0.6531	0.2279	0.5057
3474	guanosine	Nucleotide	Purine Metabolism, Guanine containing	1573	LC/MS Neg	1099	1662	282.084	118-00-3	6802	6544	C00387	HMDB00133	2.6115	3.0553	3.2152	3.5603	3.3406	1.6107	2.0251	1.4635	1.2049	1.7596	0.5951	0.5269	0.4799	0.4998	0.7086	0.2731	0.7807	0.7951	0.308	0.6611
3492	guanosine 2'-monophosphate (2'-GMP)*	Nucleotide	Purine Metabolism, Guanine containing	52442	LC/MS Neg	100002733	1150	362.051		444571	392466			0.7072	2.6668	0.1671	0.2707	2.9505	0.0957	4.8369	0.0957	1.7859	5.6346	0.2374	0.3319	0.0957	0.2451	0.0957	0.1661	2.0633	2.3445	0.0957	1.2928
3470	guanosine 3'-monophosphate (3'-GMP)	Nucleotide	Purine Metabolism, Guanine containing	39786	LC/MS Neg	100002704	773.9	362.051	117-68-0	3522	3402			0.118	0.878	0.118	0.2424	0.8691	0.118	5.7244	0.118	1.7911	8.213	1.122	0.3784	0.118	0.5541	0.1276	0.118	7.0281	4.4843	0.118	2.3041
3469	guanosine 5'- monophosphate (5'-GMP)	Nucleotide	Purine Metabolism, Guanine containing	2849	LC/MS Pos Early	347	800	364.065	5550-12-09	6804	741	C00144	HMDB01397	0.9625	1.2999	1.5	1.7645	1.2074	0.8749	2.5343	0.5613	1.3264	3.2206	0.6257	0.2964	0.2011	0.4442	0.584	0.111	2.6197	1.7758	0.1222	1.0375
3629	gulonate*	Cofactors and Vitamins	Ascorbate and Aldarate Metabolism	46957	LC/MS Polar	100001586	2750	195.051	20246-53-1	9794176	7969943	C00257	HMDB03290	7.0074	8.9236	11.3473	14.6671	13.8009	3.1339	2.7703	2.9491	1.5641	2.3436	0.2495	0.4359	0.3444	0.3383	0.2141	0.0379	0.0687	0.127	0.0556	0.0931
3675	heme	Cofactors and Vitamins	Hemoglobin and Porphyrin Metabolism	41754	LC/MS Pos Late	100001386	1124	616.176	14875-96-8	26945		C00032	HMDB03178	1.4792	1.0566	1.1316	0.8042	1.061	1.7397	2.2817	1.977	1.4515	2.0373	0.5014	1.0046	0.4888	0.7317	0.9954	0.6434	0.4231	0.4957	0.7971	0.8702
2566	heptadecasphingosine (d17:1)	Lipid	Sphingosines	57427	LC/MS Pos Late	100015724	1377	286.274	6918-48-5	5283557	4446670			0.6325	0.6994	0.7564	0.6613	0.799	0.2852	0.3718	0.2494	0.3359	0.4085	1.2675	1.4474	1.2063	1.201	1.2619	1.3133	1.2515	1.9237	1.3537	1.3222
1357	hexadecanedioate (C16-DC)	Lipid	Fatty Acid, Dicarboxylate	35678	LC/MS Neg	100001614	4615	285.207	505-54-4	10459	10027	C19615	HMDB00672	0.8847	0.6446	1	1.1843	0.8608	1.7976	1.4923	0.6446	0.6446	0.6446	0.6446	0.93	0.6446	1.1373	0.7621	0.8423	0.6446	0.6446	1.5751	1.5574
2565	hexadecasphingosine (d16:1)*	Lipid	Sphingosines	57428	LC/MS Pos Late	100015723	1289	272.258			28533427			0.7837	0.8373	0.7918	0.7306	0.9497	0.498	0.5893	0.5538	0.6132	0.6955	1.0503	1.2865	1.1502	1.1186	1.1471	1.4229	1.4986	1.711	1.3787	1.3906
1464	hexanoylcarnitine (C6)	Lipid	Fatty Acid Metabolism(Acyl Carnitine)	32328	LC/MS Pos Late	100000781	800	260.186	6920-35-0	6426853	4932273		HMDB00705	0.7531	1.0927	1.0782	0.8253	1.0933	1.0997	1.6988	0.7399	0.7423	0.9718	0.7493	0.9101	0.8731	2.0231	1.6307	0.7927	0.9633	1.0282	1.0608	1.2455
3718	hippurate	Xenobiotics	Benzoate Metabolism	15753	LC/MS Neg	100000014	2106.9	178.051	495-69-2	464	451	C01586	HMDB00714	1.4213	1.2256	1.1863	1.0698	1.721	1.1616	0.9064	1.3528	1.1379	0.9302	0.3327	0.5583	0.6215	0.3327	0.3327	0.4521	0.3327	0.602	0.3327	0.5631
65	histidine	Amino Acid	Histidine Metabolism	59	LC/MS Neg	355	755.9	154.062	5934-29-2	6274	752	C00135	HMDB00177	1.1654	1.2241	1.1334	1.1843	1.2287	1.2408	1.2799	1.5277	1.478	1.2743	0.4603	0.5569	0.5454	0.4688	0.5516	0.8666	0.4911	0.686	0.6118	0.7822
343	homocysteine	Amino Acid	Methionine, Cysteine, SAM and Taurine Metabolism	15128	LC/MS Pos Early	311	2155	136.043	454-29-5	778	757	C00155	HMDB00742	1.2413	0.9966	1.3451	1.52	1.1517	1.0034	0.8536	1.0419	1.2515	0.4541	0.3369	1.1502	1.2299	1.1957	0.9602	0.7953	0.0879	0.2136	0.1808	0.3498
360	hypotaurine	Amino Acid	Methionine, Cysteine, SAM and Taurine Metabolism	590	LC/MS Polar	358	2763.4	108.012	300-84-5	107812	96959	C00519	HMDB00965	2.013	2.2551	2.7076	4.1662	3.4586	1.0084	0.7428	0.9309	0.6083	0.6495	0.7031	1.0911	0.9916	0.6235	0.6083	0.6083	0.6083	0.6083	0.6083	0.6083
3416	hypoxanthine	Nucleotide	Purine Metabolism, (Hypo)Xanthine/Inosine containing	3127	LC/MS Neg	171	1291.2	135.031	68-94-0	790	768	C00262	HMDB00157	3.3174	3.1884	3.7836	4.0741	3.585	1.7004	1.1783	1.7646	1.1021	0.9732	0.7253	1.0268	0.8854	0.9695	0.6385	0.7853	0.4292	0.7545	0.5	0.7126
76	imidazole lactate	Amino Acid	Histidine Metabolism	15716	LC/MS Pos Early	100000263	2040	157.061	14403-45-3	440129	389128	C05568	HMDB02320	0.6829	0.5209	0.6623	1.0194	0.9911	1.5487	1.3543	1.2524	1.0089	1.1561	0.1957	0.1957	0.1957	0.2267	0.1957	0.1957	0.1957	0.1957	0.1957	0.1957
74	imidazole propionate	Amino Acid	Histidine Metabolism	40730	LC/MS Pos Early	100003434	2263	141.066	1074-59-5	70630	63798		HMDB02271	1.1479	1.0707	1.3098	1.726	1.635	0.6758	0.6503	0.9293	0.4984	0.6587	0.4984	0.4984	0.4984	0.4984	0.4984	0.4984	0.4984	0.4984	0.4984	0.4984
3415	inosine	Nucleotide	Purine Metabolism, (Hypo)Xanthine/Inosine containing	1123	LC/MS Neg	361	1602.1	267.073	58-63-9	6021	21241953	C00294	HMDB00195	2.6106	3.4709	2.7549	3.2774	3.9235	1.2146	1.3199	1.1338	0.9945	1.2287	0.9692	1.0055	0.7367	0.9809	0.7084	0.4575	0.707	0.9194	0.3971	0.7359
1740	inositol 1-phosphate (I1P)	Lipid	Inositol Metabolism	43849	LC/MS Polar	370	4785	259.022	573-35-3;106032-59-1	440194	17215924	C01177	HMDB00213	0.1545	0.8349	1.5	0.3741	1.432	1.471	1.0535	3.0384	1.7274	0.9394	0.3406	0.3109	0.5911	0.3074	0.3503	1.5607	0.9465	1.3318	1.4492	1.5778
294	isoleucine	Amino Acid	Leucine, Isoleucine and Valine Metabolism	1125	LC/MS Pos Early	376	2800	132.102	73-32-5	6306	769	C00407	HMDB00172	1.2306	1.3877	1.136	1.2216	1.4732	1.0419	1.1898	1.2471	1.2672	1.1821	0.555	0.7952	0.7805	0.8198	0.6706	0.9581	0.3894	0.7487	0.6221	0.8319
656	isoleucylglycine	Peptide	Dipeptide	40008	LC/MS Neg	100003169	1992	187.109	868-28-0	342532	303621		HMDB28907	0.471	1.3069	0.1927	0.2105	1.0963	0.3977	1.4121	0.5921	1.4722	2.1499	1.3571	0.9761	0.6656	1.0035	0.9965	0.9956	2.4185	1.7851	0.7145	1.2364
271	isovalerylcarnitine (C5)	Amino Acid	Leucine, Isoleucine and Valine Metabolism	34407	LC/MS Pos Early	100001393	3085	246.17	31023-24-2	6426851	4932271		HMDB00688	0.7696	0.8395	0.7971	1.0771	1.0171	0.7548	0.9829	0.7378	0.6778	0.8904	1.1974	1.8674	1.867	2.0636	1.3679	1.1046	0.5654	1.0967	0.8769	1.279
220	kynurenine	Amino Acid	Tryptophan Metabolism	15140	LC/MS Pos Early	100000265	2739	209.092	2922-83-0	161166	141580	C00328	HMDB00684	1.1639	1.1593	1.1922	1.5892	1.468	1.1824	0.9815	1.1236	1.0185	1.02	0.3205	0.4159	0.2146	0.3622	0.2146	0.2948	0.2146	0.3505	0.2182	0.2902
966	lactate	Carbohydrate	Glycolysis, Gluconeogenesis, and Pyruvate Metabolism	527	LC/MS Polar	482	1468.8	89.0244	79-33-4	612	592	C00186	HMDB00190	1.5031	1.5621	1.1105	1.4536	1.6104	1.248	0.9396	1.4839	1.0067	0.7907	0.6549	0.9521	1.1182	0.9933	0.6203	0.3753	0.2378	1.1326	0.2675	0.5526
259	leucine	Amino Acid	Leucine, Isoleucine and Valine Metabolism	60	LC/MS Pos Early	397	2864	132.102	61-90-5	6106	5880	C00123	HMDB00687	1.0107	1.1962	0.8241	0.863	1.1969	0.9635	1.1567	1.3463	1.684	1.3588	0.8007	0.7656	0.7061	0.7624	0.7501	1.342	0.8182	1.246	0.9893	1.2171
670	leucylalanine	Peptide	Dipeptide	40010	LC/MS Pos Early	100003179	2801	203.139	7298-84-2	259321	227625		HMDB28922	0.0364	0.0364	0.0364	0.0364	0.0364	0.0364	0.0364	0.0364	0.1403	0.1511	2.8036	0.0364	0.0364	0.0561	0.337	1	39.1872	16.2731	2.5033	1.5753
841	leucylglutamine*	Peptide	Dipeptide	48189	LC/MS Pos Early	100003183	2620	260.161		4305457	3511125		HMDB28927	0.4697	0.6446	0.3798	0.3175	0.5537	0.509	0.8887	0.8133	2.3111	1.6117	27.7348	0.9106	1.0894	0.8882	3.558	8.1226	165.846	104.022	15.0231	12.8197
675	leucylglycine	Peptide	Dipeptide	40045	LC/MS Pos Early	100003185	2778	189.123	686-50-0	79070	71402		HMDB28929	0.1844	0.366	0.1268	0.1024	0.299	0.2897	0.5866	0.467	1.0838	1.7878	13.7922	0.9162	0.4769	1.5313	3.816	2.7493	40.6044	32.9047	5.7808	7.284
92	lysine	Amino Acid	Lysine Metabolism	1301	LC/MS Pos Early	407	2850	147.113	56-87-1	5962	5747	C00047	HMDB00182	1.0085	1.1556	0.7967	0.7903	1.0549	0.9915	1.2566	1.2208	1.4726	1.2843	0.8485	0.8608	0.8163	0.8458	0.9206	1.3805	0.84	1.2106	0.9488	1.1717
1154	malate	Energy	TCA Cycle	1303	LC/MS Neg	409	615.6	133.014	6915-15-7	525	510	C00149	HMDB00156	2.908	3.6405	4.1619	4.8536	4.5645	1.0629	0.5321	0.6795	0.3946	0.337	0.9416	1.5689	1.489	1.1779	1.0584	0.6823	0.2649	0.5742	0.3169	0.4855
1342	maleate	Lipid	Fatty Acid, Dicarboxylate	20676	LC/MS Polar	100000707	2640	115.004	110-16-7	444266	392248	C01384	HMDB00176	1.1185	1.0965	1.2358	1.5315	1.9054	0.9816	0.8541	0.6085	1.5145	0.5097	0.4783	1.062	0.7803	1.0867	1.1053	0.9311	1.0084	0.9033	0.9916	0.9402
1064	mannitol/sorbitol	Carbohydrate	Fructose, Mannose and Galactose Metabolism	46142	LC/MS Polar	100001740	2320	181.072		5780	440	C00794	HMDB00247	1.0134	1.0352	1.3402	1.3834	1.6365	1.87	1.6375	1.9046	1.4012	1.3297	0.7436	0.9866	0.921	0.7676	0.6843	0.4033	0.3789	0.5689	0.3747	0.4734
1065	mannose	Carbohydrate	Fructose, Mannose and Galactose Metabolism	48153	LC/MS Polar	803	2200	225.062	3458-28-4	18950	141983	C00159	HMDB00169	2.3343	1.3446	2.466	2.1867	1.7559	2.3943	1.0218	2.6946	1.0803	0.7854	0.5389	0.8725	1.1581	0.3004	0.9782	0.8311	0.6389	0.8831	0.9576	0.8407
1066	mannose-6-phosphate	Carbohydrate	Fructose, Mannose and Galactose Metabolism	1469	LC/MS Polar	294	4510	259.022	70442-25-0;104872-94-8	439198	19969422	C00275	HMDB01078	3.7973	3.9161	4.7936	4.446	6.2471	2.7537	2.0601	3.1657	1.4163	1.2967	0.0749	0.7033	0.5905	0.3634	0.1917	0.4718	0.0948	0.4712	0.2516	0.5177
329	methionine	Amino Acid	Methionine, Cysteine, SAM and Taurine Metabolism	1302	LC/MS Pos Early	415	2526	150.058	63-68-3	6137	5907	C00073	HMDB00696	0.9909	1.1354	0.7855	0.8013	1.0778	1.0091	1.1472	1.2554	1.5413	1.2543	0.6809	0.6404	0.6275	0.6545	0.6505	1.173	0.8494	1.1152	0.8262	1.0204
333	methionine sulfone	Amino Acid	Methionine, Cysteine, SAM and Taurine Metabolism	44878	LC/MS Pos Early	100004635	1250	182.048	820-10-0	69961	63154			0.781	0.9275	0.7092	1.2519	0.8547	1.237	0.9974	1.2845	1.1501	1.0026	0.7092	0.7092	0.7092	0.7092	0.7092	0.7092	0.7092	0.7092	0.7092	0.7092
334	methionine sulfoxide	Amino Acid	Methionine, Cysteine, SAM and Taurine Metabolism	18374	LC/MS Pos Early	100000039	1272	166.053	3226-65-1	158980	139840	C02989	HMDB02005	0.9698	0.8326	0.8807	0.9843	1.0157	1.1659	1.0388	1.3412	1.3768	1.1773	0.5836	0.5456	0.64	0.5071	0.5877	1.1329	0.865	1.405	1.1581	1.3434
1431	methylmalonate (MMA)	Lipid	Fatty Acid Metabolism (also BCAA Metabolism)	1496	LC/MS Polar	418	3078.4	117.019	516-05-2	487	473	C02170	HMDB00202	4.516	6.3871	2.7918	3.8411	6.9836	1.6033	2.345	1.5417	1.3807	1.932	0.365	0.6193	0.3739	0.4797	0.3524	0.3742	0.3304	0.4172	0.3565	0.4973
3564	methylphosphate	Nucleotide	Purine and Pyrimidine Metabolism	37070	LC/MS Pos Early	100001805	544	113	7023-27-0	13130	12578		HMDB61711	1.2859	1.0082	1.4165	1.1299	1.1081	1.2039	0.7618	0.8102	0.8971	0.6164	0.835	0.9918	1.3509	1.5376	3.0691	0.6904	0.3479	0.504	1.2613	0.6243
310	methylsuccinate	Amino Acid	Leucine, Isoleucine and Valine Metabolism	15745	LC/MS Polar	2051	2800	131.035	498-21-5	10349	9922		HMDB01844	1.8901	1.7158	2.4431	2.6012	2.6748	0.6959	0.8322	1.0419	0.6959	0.708	0.9677	1.5218	0.8275	1	0.6959	0.8552	0.6959	0.7746	0.6959	0.6959
1731	myo-inositol	Lipid	Inositol Metabolism	1124	LC/MS Polar	363	3506.3	225.062	87-89-8	892	10239179	C00137	HMDB00211	3.2688	3.1846	4.1014	4.3025	4.4504	1.6847	1.2452	1.4422	1.0931	1.058	0.737	0.8898	0.942	0.8554	0.7098	0.5214	0.4349	0.6521	0.5194	0.5994
117	N,N,N-trimethyl-5-aminovalerate	Amino Acid	Lysine Metabolism	57687	LC/MS Pos Early	100015962	2186	160.133			34236878			0.9679	1.4514	1.3283	1.0321	1.6686	0.7583	1.1772	1.3314	0.2772	0.2772	0.7122	0.666	1.0754	0.8218	0.2772	0.2772	0.6152	0.2772	0.2772	0.2772
1126	N-acetyl-beta-glucosaminylamine	Carbohydrate	Aminosugar Metabolism	35469	LC/MS Pos Early	1216	1897	221.113	4229-38-3	439454	388560	C01239	HMDB01104	1.1159	0.3589	0.704	1.3988	0.767	2.3153	1	2.1782	1.042	0.3589	0.3589	0.3589	0.4763	0.3589	0.3589	0.4355	0.3589	0.3589	0.3589	0.3589
1118	N-acetyl-glucosamine 1-phosphate	Carbohydrate	Aminosugar Metabolism	15741	LC/MS Polar	1212	4052	300.049	31281-59-1	440364	389323	C04256	HMDB01367	0.1875	0.1875	0.4238	0.4276	0.6716	0.2329	0.1875	0.2574	0.2606	0.1875	1.9609	0.9074	1.0228	1	1.1035	1.2534	1.6833	2.8	1.6977	1.7854
30	N-acetylalanine	Amino Acid	Alanine and Aspartate Metabolism	1585	LC/MS Polar	1110	1564.8	130.051	97-69-8	88064	79449	C02847	HMDB00766	1.6618	1.8302	1.327	1.5133	1.9677	1.3197	1.4905	1.431	1.309	1.3768	0.4293	0.691	0.5241	0.6244	0.4242	0.5579	0.3456	0.5795	0.307	0.5306
39	N-acetylasparagine	Amino Acid	Alanine and Aspartate Metabolism	33942	LC/MS Pos Early	100001257	785	175.071	4033-40-3	99715	90090		HMDB06028	1.7978	1.6222	2.1451	2.8121	2.6081	0.9489	1.0145	0.9855	0.7453	0.7547	0.1068	0.1068	0.1122	0.1068	0.1068	0.1068	0.1068	0.1068	0.1068	0.1068
35	N-acetylaspartate (NAA)	Amino Acid	Alanine and Aspartate Metabolism	22185	LC/MS Polar	100000787	3143	174.041	997-55-7;997-55-7	65065	58576	C01042	HMDB00812	3.9628	3.4186	6.0952	6.5957	7.6839	1.2959	1.0995	1.7144	0.7876	1.2689	0.4626	0.7714	0.8406	1.1329	0.6827	0.7505	0.3594	0.8162	0.6193	0.9005
349	N-acetylcysteine	Amino Acid	Methionine, Cysteine, SAM and Taurine Metabolism	1586	LC/MS Pos Early	1107	1416	164.038	616-91-1	12035	11540	C06809	HMDB01890	1.1007	1.6073	0.8933	1.1197	1.809	0.5828	1.218	0.8448	1.0643	1.6359	0.8572	1	1.2013	1.5489	0.6308	0.9934	0.2788	0.8412	0.2788	0.9795
1117	N-acetylglucosamine 6-phosphate	Carbohydrate	Aminosugar Metabolism	15107	LC/MS Polar	1213	4114	300.049	102029-88-9	439219	8216065	C00357	HMDB02817	0.8955	0.9935	1.3117	1.1196	1.4196	1.2321	1	1.7499	1.1422	0.9951	0.425	1.4661	1.8792	0.9172	0.825	1.9299	0.425	0.4905	0.8927	0.956
1138	N-acetylglucosamine/N-acetylgalactosamine	Carbohydrate	Aminosugar Metabolism	46539	LC/MS Pos Early	100006435	715	222.097		24139			HMDB00215	0.8493	0.9848	1.0287	0.8059	0.7088	0.9592	0.8837	1.0152	0.9612	0.85	0.8654	1.0569	1.1782	1.1059	1.1745	1.056	0.8928	1.2608	1.1128	1.1371
1135	N-acetylglucosaminylasparagine	Carbohydrate	Aminosugar Metabolism	48149	LC/MS Pos Early	1215	1212	336.14	2776-93-4	123826	21403014	C04540	HMDB00489	2.1378	2.7213	1.9367	3.0554	3.9983	0.4905	0.8374	0.5613	0.4905	0.609	0.4905	1.1626	0.6481	0.7864	0.4905	0.4905	0.4905	0.4905	0.4905	0.4905
44	N-acetylglutamate	Amino Acid	Glutamate Metabolism	15720	LC/MS Polar	100000282	3106	188.056	5817-08-03	70914	1266066	C00624	HMDB01138	2.6457	2.7876	3.9666	3.9419	4.5282	0.4572	0.3669	0.5161	0.308	0.4083	1.2975	1.8613	1.5072	1.8948	1.1543	0.5676	0.5078	0.8457	0.2976	0.6978
45	N-acetylglutamine	Amino Acid	Glutamate Metabolism	33943	LC/MS Pos Early	100001253	845	189.087	2490-97-3	182230	158492	C02716	HMDB06029	1.0061	1.0227	1.3213	1.3965	1.5418	0.1701	0.1109	0.1358	0.1357	0.1432	1.1673	2.1405	1.813	1.6383	1.0577	0.6726	0.3366	0.9939	0.5035	0.7964
330	N-acetylmethionine	Amino Acid	Methionine, Cysteine, SAM and Taurine Metabolism	1589	LC/MS Neg	1083	1787	190.054	65-82-7	448580	395338	C02712	HMDB11745	0.9373	1.221	0.7502	0.7658	1.1355	1.2088	1.5896	1.5145	1.8071	1.9473	0.7488	0.7421	0.6439	0.701	0.6183	1.0767	0.8997	1.3448	0.6213	1.0627
335	N-acetylmethionine sulfoxide	Amino Acid	Methionine, Cysteine, SAM and Taurine Metabolism	45428	LC/MS Pos Early	100005463	880	208.064	108646-71-5	193368	167798			1.04	0.9106	1.0037	0.9963	0.8895	1.736	1.613	2.3167	2.6159	1.7555	0.5653	0.6548	0.6397	0.5824	0.4307	1.3588	0.9336	1.9567	0.7961	1.3327
1124	N-acetylneuraminate	Carbohydrate	Aminosugar Metabolism	32377	LC/MS Pos Early	1162	660	310.113	131-48-6	439197	10292217	C00270	HMDB00230	0.9933	1.1218	1.0778	1.0518	1.0704	0.9555	1.0067	0.9522	1.0075	1.1267	0.9316	1.1782	1.1045	1.1834	0.9915	0.7875	0.7041	0.9253	0.7008	0.8539
426	N-acetylputrescine	Amino Acid	Polyamine Metabolism	37496	LC/MS Pos Early	192	2230	131.118	18233-70-0	122356	109095	C02714	HMDB02064	1.7605	1.9249	1.7939	2.4001	2.8099	0.0915	0.1635	0.2395	0.1602	0.2329	0.0915	0.0915	0.0915	0.0915	0.0915	0.0915	0.0915	0.0915	0.0915	0.0915
10	N-acetylserine	Amino Acid	Glycine, Serine and Threonine Metabolism	37076	LC/MS Pos Early	100001851	800	148.06	97-14-3	65249	58744		HMDB02931	2.66	2.2663	2.7159	2.8929	2.7536	2.1125	1.6252	2.5258	2.1033	1.1274	0.5229	0.7737	0.8349	0.8194	0.5519	0.8726	0.3137	0.6021	0.5855	0.7036
17	N-acetylthreonine	Amino Acid	Glycine, Serine and Threonine Metabolism	33939	LC/MS Neg	100001274	821.6	160.062	17093-74-2	152204	3841173			2.0755	2.6488	2.317	2.64	3.0512	1.5294	1.9635	1.3278	1.3087	1.9008	0.4074	0.6913	0.4986	0.5748	0.366	0.388	0.2503	0.4179	0.2027	0.3381
331	N-formylmethionine	Amino Acid	Methionine, Cysteine, SAM and Taurine Metabolism	2829	LC/MS Neg	194	1543.8	176.039	4289-98-9	439750	388809	C03145	HMDB01015	2.0011	2.0777	2.3219	2.6418	2.3751	1.2581	0.9113	1.3984	1	0.7929	0.5363	1.0729	0.894	1.0685	0.5153	0.4336	0.2055	0.5472	0.2055	0.4042
4101	N-glycolylneuraminate	Xenobiotics	Food Component/Plant	37123	LC/MS Pos Early	100001491	636	326.108	1113-83-3	123802	3794850	C03410	HMDB00833	0.7965	1	1.0025	1.036	1.1256	0.6637	0.4287	0.2217	0.3837	0.7022	1.0183	1.5247	1.03	1.5743	1.018	0.761	0.2217	1.0429	0.4805	0.804
400	N-monomethylarginine	Amino Acid	Urea cycle; Arginine and Proline Metabolism	43586	LC/MS Pos Early	100004488	2845	189.135	53308-83-1	132862	117259	C03884	HMDB29416	1.1948	1.0228	0.9772	0.9469	1.241	1.3417	1.2436	1.7568	2.3239	1.3383	0.3345	0.2997	0.4548	0.2341	0.4154	1.4455	0.3738	0.7623	0.8378	1.101
1709	N-stearoyltaurine	Lipid	Endocannabinoid	39730	LC/MS Neg	100003240	5782	390.268	63155-80-6	168274	147194			0.7492	0.7492	0.7492	0.7492	0.7492	0.7492	0.7492	0.7492	0.7492	0.7492	0.7492	0.7492	0.7492	0.7492	1.9562	1.0673	1.3406	0.9058	1	0.9642
3446	N1-methyladenosine	Nucleotide	Purine Metabolism, Adenine containing	15650	LC/MS Pos Early	1242	2120	282.12	15763-06-1	27476	4573813	C02494	HMDB03331	9.7108	4.7578	27.8623	30.9926	6.4676	9.6264	2.8429	9.2746	1.8522	1.095	0.3687	0.4783	0.905	0.4904	0.5323	0.7124	0.3913	0.8671	0.4519	0.665
3483	N2,N2-dimethylguanosine	Nucleotide	Purine Metabolism, Guanine containing	35137	LC/MS Pos Early	100001412	2210	312.13	2140-67-2	92919	83878		HMDB04824	1.9337	0.7563	5.2192	5.3955	1	1.5513	0.4841	1.0796	0.2591	0.1732	0.0466	0.0466	0.0466	0.0466	0.0466	0.0466	0.0466	0.0466	0.0466	0.0466
99	N6,N6,N6-trimethyllysine	Amino Acid	Lysine Metabolism	1498	LC/MS Pos Early	189	2825	189.16	23284-33-5	440120	140379	C03793	HMDB01325	1.082	1.0979	1.0459	1.0434	1.0758	1.3339	1.228	1.6191	1.5314	1.3605	0.2923	0.3518	0.4327	0.3603	0.3118	0.9566	0.4444	0.8074	0.379	0.7161
94	N6-acetyllysine	Amino Acid	Lysine Metabolism	36752	LC/MS Neg	100001734	1059	187.109	692-04-6	92832	83801	C02727	HMDB00206	0.8449	1.5716	0.3612	0.4784	1.168	0.3612	1.6368	0.634	2.0577	2.6117	0.7051	0.3612	0.3817	0.5743	0.765	2.1223	0.7671	1.5183	1.1551	1.212
3456	N6-carbamoylthreonyladenosine	Nucleotide	Purine Metabolism, Adenine containing	35157	LC/MS Neg	100001415	2164	411.127	24719-82-2	161466	141829		HMDB41623	2.0012	1.5087	3.9735	3.6625	1.6836	1.3692	0.6755	1.3245	0.5734	0.399	0.1142	0.362	0.3056	0.5302	0.1142	0.1142	0.1142	0.1142	0.1142	0.1142
3447	N6-methyladenosine	Nucleotide	Purine Metabolism, Adenine containing	37114	LC/MS Pos Early	213	2264	282.12	1867-73-8	1869	92307		HMDB04044	1.9933	1.8518	2.5088	2.929	2.2913	3.2563	1.305	4.1041	1.4926	0.7795	0.223	0.5198	0.5601	0.3039	0.2737	0.6528	0.4643	1	0.223	0.9841
3466	N6-succinyladenosine	Nucleotide	Purine Metabolism, Adenine containing	48130	LC/MS Neg	100001664	940	382.1	4542-23-8	165243			HMDB00912	0.4875	2.2819	0.8667	1.1333	3.6297	0.129	0.129	0.129	0.129	0.129	0.7782	1.3056	0.129	1.6997	0.129	0.129	0.129	0.2765	0.129	0.129
3585	nicotinamide	Cofactors and Vitamins	Nicotinate and Nicotinamide Metabolism	594	LC/MS Pos Early	432	1942	123.055	98-92-0	936	911	C00153	HMDB01406	1.8812	1.9239	2.218	2.1679	2.0632	1.2161	1.2349	1.3167	1.1512	1.0132	0.5787	0.9127	0.807	0.9868	0.6392	0.5838	0.237	0.583	0.345	0.551
3589	nicotinamide adenine dinucleotide (NAD+)	Cofactors and Vitamins	Nicotinate and Nicotinamide Metabolism	5278	LC/MS Neg	1310	1434	662.102	53-84-9	5893	5681	C00003	HMDB00902	1.1152	1	1.1796	1.2239	1.0416	0.5804	0.6263	0.4245	0.4671	0.6769	1.774	2.5554	1.1075	2.6801	1.0344	0.1989	0.1989	0.284	0.2398	0.3002
3588	nicotinamide riboside	Cofactors and Vitamins	Nicotinate and Nicotinamide Metabolism	33013	LC/MS Pos Early	100001310	2040	255.098	1341-23-7	439924		C03150	HMDB00855	1.1501	1.382	1.4496	1.593	1.9926	1	0.7533	1.1519	0.6792	0.769	0.2211	0.2013	0.4013	0.2013	0.2013	0.2013	0.2013	0.2013	0.2013	0.2013
3583	nicotinate ribonucleoside	Cofactors and Vitamins	Nicotinate and Nicotinamide Metabolism	33471	LC/MS Pos Early	100001316	1536	256.082	2625-49-2	161234	141635	C05841	HMDB06809	1.1282	0.9437	1.1638	1.0891	1	0.0921	0.0921	0.0921	0.0921	0.0921	0.0921	0.0921	0.1059	0.0921	0.0921	0.0921	0.0921	0.0921	0.0921	0.0921
178	O-methyltyrosine	Amino Acid	Tyrosine Metabolism	37451	LC/MS Pos Early	100002078	2790	196.097	1080-06-4	76957	69406		HMDB14903	1.2185	1.403	1.2903	1.2679	1.5623	0.9416	1	0.9862	1.0116	0.9197	0.844	1.2225	0.844	1.5514	1.0169	0.3303	0.3303	0.5576	0.4336	0.5232
1696	oleoyl ethanolamide	Lipid	Endocannabinoid	38102	LC/MS Pos Late	1137	1661	326.305	11-58-0;111-58-0	5283454	4446574		HMDB02088	1.3709	1.2353	1.6814	1.5887	1.5457	0.9696	0.9772	1.3782	1.2629	1.0228	0.5352	0.6872	0.7641	0.789	0.732	1.0307	0.5469	1.1437	0.9686	0.9034
1529	oleoylcholine	Lipid	Fatty Acid Metabolism (Acyl Choline)	53260	LC/MS Pos Late	100009331	1449	368.352						0.9297	0.8745	2.85	2.6047	1	0.6016	0.6016	0.6016	0.6016	0.6016	0.6016	1.0565	0.6016	0.8294	0.6016	0.6016	0.6016	1.0255	0.6016	0.6016
452	ophthalmate	Amino Acid	Glutathione Metabolism	34592	LC/MS Pos Early	100001311	2085	290.135	495-27-2	7018721	7993181		HMDB05765	1.164	1.1666	1.3602	1.5422	1.7311	0.106	0.1385	0.1221	0.1049	0.1196	2.4821	4.3006	3.9333	4.0596	2.2503	0.7897	0.2372	0.7627	0.4622	0.836
372	ornithine	Amino Acid	Urea cycle; Arginine and Proline Metabolism	1493	LC/MS Pos Early	444	2800	133.097	3184-13-2	6262	6026	C00077	HMDB03374	1.2603	0.4699	1.046	1.1733	0.5959	1.691	0.7688	2.0497	1.1334	0.5674	0.4839	0.7266	0.8728	0.6921	0.6243	1.725	0.954	1.2652	1.1076	1.2436
3496	orotate	Nucleotide	Pyrimidine Metabolism, Orotate containing	1505	LC/MS Polar	445	1638.1	155.01	50887-69-9	967	942	C00295	HMDB00226	15.8791	19.712	3.475	6.7428	22.7276	0.0908	0.9294	0.1426	0.9094	2.2593	0.9283	1.2663	0.9859	1.2914	0.8929	0.8167	0.6034	1.0697	0.6682	1.0141
3498	orotidine	Nucleotide	Pyrimidine Metabolism, Orotate containing	35172	LC/MS Polar	100001416	2250	287.052	314-50-1	92751	83729		HMDB00788	2.6443	2.8241	3.9923	4.332	4.5746	1.4913	1.4745	1.4296	0.9914	1.1758	0.5572	1.0086	0.7193	0.6718	0.545	0.2736	0.2218	0.4244	0.2849	0.3363
1699	palmitoyl ethanolamide	Lipid	Endocannabinoid	38165	LC/MS Neg	1489	6300	298.275	544-31-0	4671	4509	C16512	HMDB02100	1.477	0.9486	0.8924	1.3141	1.0848	0.5562	0.7486	0.8443	0.9304	0.3859	0.8226	1.0203	1.1226	0.9027	1.3129	1.5343	1.0546	1.1275	0.9797	1.156
1476	palmitoylcarnitine (C16)	Lipid	Fatty Acid Metabolism(Acyl Carnitine)	44681	LC/MS Pos Late	100000776	1425	400.342	6865-14-1	461	448	C02990	HMDB00222	1.0243	1.4829	1.7267	1.5889	2.3816	0.3284	0.4522	0.3138	0.4047	0.6609	2.0124	3.4818	2.2677	3.2022	2.283	0.339	0.3872	0.9757	0.5196	0.5338
1528	palmitoylcholine	Lipid	Fatty Acid Metabolism (Acyl Choline)	52944	LC/MS Pos Late	100009233	1482	342.337		151731	133731			1.348	1.0435	2.5988	2.5568	1.4147	0.474	0.474	0.474	0.474	0.474	0.474	1.0358	0.6958	0.688	0.474	0.474	0.474	0.9642	0.6699	0.7198
3619	pantetheine	Cofactors and Vitamins	Pantothenate and CoA Metabolism	57555	LC/MS Neg	100001495	2765	277.123	496-65-1	439322	388453	C00831		1.1942	0.4329	1.0545	0.9147	0.5121	3.486	0.9202	3.7715	3.0281	0.5935	0.7423	0.9455	1.3067	0.7013	1.763	1.2364	0.5962	0.7976	1.349	1.1385
3612	pantothenate	Cofactors and Vitamins	Pantothenate and CoA Metabolism	1508	LC/MS Pos Early	1024	1667	220.118	137-08-6	6613	6361	C00864	HMDB00210	0.99	0.9097	1.4027	1.7306	1.2579	0.498	0.2722	0.4729	0.2608	0.1525	1.675	2.6863	2.2608	2.4466	1.4975	0.7144	0.3655	1.0795	0.6057	1.01
4454	penicillin G	Xenobiotics	Drug - Antibiotic	37468	LC/MS Pos Early	100002155	2870	335.106	69-57-8	5904	2259	C05551	HMDB15186	1.732	1.6769	1.8048	1.7878	2.2133	1.054	0.8511	1.206	1.0849	0.7387	0.6602	0.8957	1.152	0.8622	0.74	0.946	0.6317	1.1861	0.8143	0.9151
4880	phenol red	Xenobiotics	Chemical	36817	LC/MS Neg	100001724	3665.9	353.049	143-74-8	4766	4602	C12600		0.6452	0.7152	0.5876	0.5255	0.7762	0.801	0.5969	0.8896	0.8588	0.6162	1.3298	1.4911	1.714	1.4803	1.4608	1.2787	1.1104	1.9927	1.4376	1.3664
920	phenylacetylglycine	Peptide	Acetylated Peptides	33945	LC/MS Neg	100001275	2375	192.067	500-98-1	68144	61452	C05598	HMDB00821	2.433	2.057	2.2267	2.9431	3.1592	1.0424	1	1.2742	0.9948	0.5236	0.6946	0.9733	1.1494	1.025	0.6312	0.3819	0.2849	0.4399	0.2849	0.6084
118	phenylalanine	Amino Acid	Phenylalanine Metabolism	64	LC/MS Pos Early	460	2878	166.086	63-91-2	6140	5910	C00079	HMDB00159	1.0019	1.2145	0.7794	0.7873	1.2255	0.9981	1.2696	1.2404	1.5889	1.4141	0.8141	0.8178	0.7465	0.8435	0.7856	1.2711	0.8648	1.1679	0.8935	1.1254
724	phenylalanylalanine	Peptide	Dipeptide	41374	LC/MS Pos Early	100003589	2909	237.123	3918-87-4	5488196	4589716			0.1539	0.1539	0.1539	0.1539	0.1539	0.1539	0.1903	0.1539	0.9177	0.5323	5.0778	0.2091	0.3994	0.1945	1.0823	2.896	15.4895	12.2491	4.5207	4.2048
728	phenylalanylglycine	Peptide	Dipeptide	41370	LC/MS Pos Early	100003588	2898	223.108	721-90-4	98207	88678		HMDB28995	0.2762	0.5137	0.1613	0.1197	0.3945	0.433	0.9445	0.9199	2.5606	1.9389	3.0704	1.0042	0.9958	0.9818	1.7424	3.4052	6.4918	5.5549	2.9849	3.3393
1168	phosphate	Energy	Oxidative Phosphorylation	42109	LC/MS Pos Early	461	576	98.9842	7664-38-2	1061	1032	C00009	HMDB01429	1.0453	0.9477	1.0684	0.9796	1.0646	1.1271	1.1181	1.1995	1.0923	1.0204	0.7457	0.8643	0.8986	0.8602	0.7009	1.0312	0.9095	1.1777	0.8613	0.8639
964	phosphoenolpyruvate (PEP)	Carbohydrate	Glycolysis, Gluconeogenesis, and Pyruvate Metabolism	597	LC/MS Neg	463	587.3	166.975	10526-80-4	1005	980	C00074	HMDB00263	0.6367	0.4342	1.1877	0.8555	0.4144	0.9881	1.2822	1.2038	1.8089	1.2536	0.604	1.2951	1.1386	1.0119	0.5838	1.7529	0.5343	0.7436	0.76	1.2703
1766	phosphoethanolamine	Lipid	Phospholipid Metabolism	1600	LC/MS Pos Early	1026	700	142.026	1071-23-4	1015	990	C00346	HMDB00224	1.0727	1	1.2997	1.5176	1.4189	0.3314	0.184	0.3264	0.2134	0.184	0.184	0.184	0.184	0.184	0.184	0.184	0.184	0.184	0.184	0.184
3614	phosphopantetheine	Cofactors and Vitamins	Pantothenate and CoA Metabolism	15504	LC/MS Neg	100000328	1597	357.089	NA	987	103123	C01134	HMDB01416	2.0497	1.0515	2.3339	2.2813	1.303	3.5987	1.1834	3.6204	3.7145	0.8476	0.4986	0.8057	1.1073	0.602	0.663	0.9485	0.3341	0.5228	0.7433	0.8594
2441	phytosphingosine	Lipid	Sphingolipid Synthesis	1510	LC/MS Pos Late	469	1367	318.3	554-62-1	122121	21238683	C12144	HMDB04610	1.9336	2.1343	2.4937	2.2419	2.5359	0.981	0.9573	1.2392	1.2041	1.2797	0.7822	0.987	0.8278	0.7362	0.7419	1.013	0.8984	1.3856	0.8964	0.9056
379	proline	Amino Acid	Urea cycle; Arginine and Proline Metabolism	1898	LC/MS Pos Early	480	1603	116.071	147-85-3	145742	128566	C00148	HMDB00162	1.6775	1.7094	1.5518	1.8166	1.7879	1.1861	1.203	1.4668	1.3595	1.143	0.6711	0.819	0.857	0.8272	0.682	0.7566	0.4639	0.7889	0.5	0.7706
747	prolylglycine	Peptide	Dipeptide	40703	LC/MS Pos Early	100003674	2136	173.092	2578-57-6	6426709	4932143		HMDB11178	0.4668	0.5927	0.2303	0.2627	0.6291	0.4425	0.7055	1.0044	1.5205	0.8282	1.3713	1.021	1.0043	0.9957	1.2362	1.8542	0.9812	1.5191	1.0865	1.7068
1428	propionylcarnitine (C3)	Lipid	Fatty Acid Metabolism (also BCAA Metabolism)	32452	LC/MS Pos Early	100001162	2590	218.139	17298-37-2	107738	96904	C03017	HMDB00824	1.0436	1.4413	0.933	1.5224	1.8857	1.8065	2.9573	1.7418	2.1765	2.7627	0.916	0.7232	0.581	0.9564	0.5566	0.3096	0.3096	0.3096	0.5183	0.4379
1630	prostaglandin A2	Lipid	Eicosanoid	19761	LC/MS Neg	100000578	4876	333.207	13345-50-1	5280880	4444403	C05953	HMDB02752	5.7159	2.7422	4.3972	4.691	2.901	2.6765	1.5139	2.1302	2.0179	0.958	0.3206	0.3991	1.042	0.4206	0.6402	0.8553	0.3951	0.7634	0.711	0.5799
1628	prostaglandin E2	Lipid	Eicosanoid	7746	LC/MS Neg	487	4573	351.218	363-24-6	5280360	4444059	C00584	HMDB01220	4.1308	2.3486	3.9277	4.8519	2.6288	2.9233	1.6399	2.8466	2.2025	1.1115	0.2869	0.3482	0.7943	0.286	0.5159	0.8885	0.4985	0.7155	0.8281	0.6908
1640	prostaglandin F2alpha	Lipid	Eicosanoid	19398	LC/MS Neg	100000574	4658	353.233	551-11-1	5280363	4444062	C00639	HMDB01139	0.7168	0.8421	0.5278	0.4662	0.6049	0.6437	0.4639	0.3057	0.4492	0.2671	1.1579	1.6394	2.6366	1.3837	1.5814	3.7197	2.0948	3.7197	3.4678	3.0561
3510	pseudouridine	Nucleotide	Pyrimidine Metabolism, Uracil containing	33442	LC/MS Neg	821	1100	243.062	1445-07-4	15047	21403010	C02067	HMDB00767	3.525	2.025	5.7436	5.5282	2.2623	4.175	1.4387	3.6913	1.354	0.9667	0.4841	0.8189	0.9979	0.7953	0.9086	0.7715	0.5109	1.0021	0.6347	0.8636
3664	pterin	Cofactors and Vitamins	Pterin Metabolism	43023	LC/MS Pos Early	100004216	1805	164.057	22363-60-4	73000	65806	C00715	HMDB00802	0.752	0.4182	1.1007	1.1154	0.7026	1.2415	0.9089	1.3331	1.343	1.0911	0.6447	1.309	1.2205	1.2433	0.6121	0.229	0.229	0.2414	0.229	0.2999
414	putrescine	Amino Acid	Polyamine Metabolism	1408	LC/MS Pos Early	49	3027	89.1073	110-60-1	1045	13837702	C00134	HMDB01414	9.4218	6.9919	9.8334	11.6058	9.9722	1.4313	1.6951	1.4849	1.354	1.1514	0.5561	0.8486	0.7496	0.7002	0.7833	0.5402	0.4367	0.6818	0.3644	0.5501
3715	pyridoxal	Cofactors and Vitamins	Vitamin B6 Metabolism	1651	LC/MS Pos Early	491	2343	168.066	65-22-5	1050	1021	C00250	HMDB01545	1.4572	1.6362	1.8145	1.6906	1.5018	0.9399	0.7002	0.7555	0.6634	0.6478	1.069	1.1348	1.0112	1.2545	0.9888	0.9393	0.8913	1.0701	0.6009	0.6899
3712	pyridoxamine	Cofactors and Vitamins	Vitamin B6 Metabolism	2150	LC/MS Pos Early	568	2975	169.097	58052-48-5	1052	1023	C00534	HMDB01431	1.0006	1.0274	1.0794	1.2057	1.1607	0.8221	0.4956	0.7494	0.5918	0.5533	1.0646	1.5121	1.378	1.7225	1.1133	0.8244	0.4925	0.9994	0.6798	0.8151
3713	pyridoxamine phosphate	Cofactors and Vitamins	Vitamin B6 Metabolism	3138	LC/MS Pos Early	493	1932	249.063	529-96-4	1053	1024	C00647	HMDB01555	1.4514	1.3746	1.3234	1.2447	1.669	1.2129	1.0066	1.0595	1.299	1.1914	0.6355	0.9344	0.8423	0.8482	0.6802	0.6617	0.6346	0.9934	0.786	0.743
51	pyroglutamine*	Amino Acid	Glutamate Metabolism	46225	LC/MS Pos Early	100001540	1900	129.066	2353-44-8	134508	118562			0.8647	0.993	0.7822	1.1217	1.3033	0.6764	0.7391	0.7665	0.7428	0.7682	1.314	1.471	1.577	1.6134	1.2315	1.007	0.5792	1.0974	0.8095	1.0534
965	pyruvate	Carbohydrate	Glycolysis, Gluconeogenesis, and Pyruvate Metabolism	48990	LC/MS Polar	823	1083	87.0088	127-17-3	1060	96901	C00022	HMDB00243	1.4966	0.9295	2.2719	2.4188	1.5017	1.5347	1.8257	2.0398	1.0419	0.8307	0.3996	0.7342	0.6902	0.9608	0.9521	1.0392	0.3996	0.3996	0.5732	0.6165
3696	retinol (Vitamin A)	Cofactors and Vitamins	Vitamin A Metabolism	1806	LC/MS Pos Late	498	1636	269.226	68-26-8	445354	393012	C00473	HMDB00305	1.0833	1.3654	1.4701	1.319	1.4929	1.3119	1.5978	1.3988	0.9634	1.3364	0.9446	0.8924	1	0.8293	0.5983	0.4124	0.2991	0.2991	0.4191	0.6228
984	ribitol	Carbohydrate	Pentose Metabolism	15772	LC/MS Polar	100000406	1789.6	151.061	488-81-3	6912	10254628	C00474	HMDB00508	1.5452	1.8199	2.9664	3.0619	2.9779	0.6732	0.2887	0.2887	0.2887	0.2887	0.596	1.0355	1.4531	0.9645	0.6808	0.2887	0.2887	0.4615	0.2887	0.3348
3609	riboflavin (Vitamin B2)	Cofactors and Vitamins	Riboflavin Metabolism	1827	LC/MS Neg	500	3160	255.089	83-88-5	493570	431981	C00255	HMDB00244	1.5718	1.8588	2.3444	2.5442	2.5747	0.7894	0.6568	0.8696	0.6277	0.4647	0.8246	0.9262	1.0205	0.9153	1.4638	1.0481	0.6452	1.2405	1.6999	0.9795
985	ribonate	Carbohydrate	Pentose Metabolism	27731	LC/MS Polar	100001007	2425	165.04	5336-08-03	5460677	4574162	C01685	HMDB00867	1.4565	1.3079	2.7668	3.6516	3.1448	0.6921	0.463	0.6597	0.3841	0.3841	0.3841	0.4815	0.3841	0.3841	0.3841	0.3841	0.3841	0.3841	0.3841	0.3841
983	ribose	Carbohydrate	Pentose Metabolism	1471	LC/MS Polar	914	1508.2	195.051	50-69-1	5779	4470639	C00121	HMDB00283	1.4522	1.5619	1.9104	1.7368	1.5799	1.4222	1.0166	1.7612	0.9834	0.9728	0.8992	0.8489	1.1257	1.03	0.9774	0.6322	0.406	0.5476	0.5887	0.5174
975	ribose 1-phosphate	Carbohydrate	Pentose Phosphate Pathway	1763	LC/MS Polar	219	4025	229.012	50-99-7;58459-37-3	439236	388373	C00620	HMDB01489	1.2626	1.8574	1.5005	1.8071	2.3703	1.1263	1.423	1.2127	1.2048	1.4592	0.4994	0.5611	0.5321	0.4654	0.2826	0.2625	0.8737	0.8351	0.2853	0.4221
973	ribulose 5-phosphate	Carbohydrate	Pentose Phosphate Pathway	1474	LC/MS Polar	296	3922	229.012	18265-46-8;108321-99-9	439184	388327	C00199	HMDB00618	2.0905	3.3117	2.8667	2.8661	3.9566	0.9702	0.957	1.0633	0.9369	1.8501	1.7638	0.7284	0.4036	1	0.1903	0.3519	0.9265	1.0051	0.1903	0.4992
59	S-1-pyrroline-5-carboxylate	Amino Acid	Glutamate Metabolism	42370	LC/MS Pos Early	35	1528	114.055	2906-39-0	1196	10140206	C04322	HMDB01301	3.2338	2.1007	3.0715	3.8669	2.4256	1.4413	1.1772	2.5418	2.3431	0.6684	0.0579	0.0579	0.1333	0.0579	0.0878	0.8228	0.324	0.4422	0.2257	0.1739
340	S-adenosylhomocysteine (SAH)	Amino Acid	Methionine, Cysteine, SAM and Taurine Metabolism	42382	LC/MS Neg	197	1832.4	383.114	979-92-0	439155	16788012	C00021	HMDB00939	1.4938	1.4407	1.5602	1.6619	1.7027	1.6639	1.252	1.6581	1.5285	0.9967	0.5014	0.9163	1.0033	0.781	0.7262	0.648	0.3199	0.5855	0.728	0.6913
339	S-adenosylmethionine (SAM)	Amino Acid	Methionine, Cysteine, SAM and Taurine Metabolism	15915	LC/MS Pos Early	1263	3002	399.145	24346-00-7;86867-01-8;86867-0108	34756		C00019	HMDB01185	1.8725	2.0895	2.0762	2.5383	3.1107	1.6006	1.6894	1.311	1.261	1.4077	0.5228	0.739	0.6915	0.7386	0.4805	0.2552	0.25	0.5657	0.2046	0.3358
443	S-lactoylglutathione	Amino Acid	Glutathione Metabolism	15731	LC/MS Pos Early	1343	2124	380.112	54398-03-7	440018	1053	C03451	HMDB01066	4.0845	3.312	7.3858	7.4488	4.9206	1.4206	1	1.1858	0.3886	0.272	0.0596	0.169	0.1011	0.317	0.0596	0.0746	0.0596	0.0596	0.0596	0.0596
442	S-methylglutathione	Amino Acid	Glutathione Metabolism	33944	LC/MS Pos Early	100001259	2200	322.107	2922-56-7	3605667	2841309	C11347		1.0508	1.3385	1.0512	1.5692	2.3683	0.1831	0.181	0.181	0.181	0.181	0.3739	0.8565	0.5211	1	0.181	0.181	0.181	0.181	0.181	0.181
1009	sedoheptulose	Carbohydrate	Pentose Metabolism	53237	LC/MS Polar	100002619	2255	209.067	3019-74-7	5459879	4573620		HMDB03219	2.1458	1.2734	3.3423	3.1726	1.8542	1.3655	0.4471	1.3584	0.4708	0.316	0.5429	1.0216	1.4229	0.9784	1.2347	0.6305	0.0709	0.5845	0.8498	0.5673
977	sedoheptulose-7-phosphate	Carbohydrate	Pentose Phosphate Pathway	35649	LC/MS Neg	100001628	599.6	289.033	2646-35-7	616	596	C05382	HMDB01068	2.5873	2.149	2.5341	2.5741	2.4491	1.4173	1.0711	1.4487	0.9666	0.8879	0.5408	1.1304	0.8676	1.0168	0.5033	0.7972	0.3139	0.9832	0.6291	0.9265
9	serine	Amino Acid	Glycine, Serine and Threonine Metabolism	1648	LC/MS Pos Early	503	1239	106.05	56-45-1	5951	5736	C00065	HMDB00187	1.3269	1.4194	0.9806	1.0173	1.4113	1.5108	1.6209	2.0881	2.2176	1.7159	0.5982	0.7129	0.7716	0.6624	0.7059	1.2715	0.6544	0.8612	0.9247	0.9827
3893	shikimate 3-phosphate	Xenobiotics	Food Component/Plant	38656	LC/MS Pos Early	100002628	583	255.026	63959-45-5	121947	108789	C03175		2.7693	2.2121	2.5995	2.4145	2.555	0.559	0.559	0.7257	0.6519	0.559	0.559	1.2464	1.0825	1.3786	0.7242	0.9175	0.559	0.9116	0.571	0.8936
417	spermidine	Amino Acid	Polyamine Metabolism	485	LC/MS Pos Late	50	700	146.165	124-20-9	1102	1071	C00315	HMDB01257	2.2561	1.6673	2.474	2.2454	1.5199	1.8188	1.2668	1.047	0.9695	0.6885	0.5659	0.8743	0.7402	1.0305	1.3389	0.5627	0.1231	0.1197	0.7221	0.5046
422	spermine	Amino Acid	Polyamine Metabolism	603	LC/MS Pos Late	507	758	203.223	71-44-3	1103	1072	C00750	HMDB01256	1.1712	1.0964	0.8901	1.0317	0.7279	1.0248	0.6626	1.149	1.1122	0.4786	0.775	0.8334	0.9082	0.9752	1.7249	2.4015	0.6186	0.6719	2.4359	1.8988
2440	sphingadienine	Lipid	Sphingolipid Synthesis	57426	LC/MS Pos Late	100015643	1350	298.274	25696-03-1	6449795	4952479			0.7294	0.8449	0.7815	0.7036	0.9968	0.7042	0.8242	0.829	0.9154	0.9769	1.0032	1.1941	1.0808	1.0587	1.0509	1.221	1.1846	1.5502	1.2016	1.231
2438	sphinganine	Lipid	Sphingolipid Synthesis	17769	LC/MS Pos Late	313	1413	302.305	3102-56-5	3126	3014	C00836	HMDB00269	0.712	0.7274	0.8763	0.7681	0.839	0.2811	0.2904	0.3154	0.3216	0.3455	1.1237	1.2671	1.2926	1.23	1.3261	1.8575	1.6178	2.2228	1.9528	1.8976
2557	sphingosine	Lipid	Sphingosines	17747	LC/MS Pos Late	297	1393	300.29	123-78-4	5353955	4510275	C00319	HMDB00252	0.846	0.9355	0.9187	0.8081	1.0245	0.5674	0.6166	0.5877	0.6428	0.6879	0.9776	1.135	1.0399	1.0318	1.0224	1.2001	1.0895	1.4086	1.1682	1.1962
4178	stachydrine	Xenobiotics	Food Component/Plant	34384	LC/MS Pos Early	100001296	1440	144.102	4136-37-2	115244	103115	C10172	HMDB04827	1.7296	1.5273	1.2989	2.1243	1.9339	1	0.8983	0.9028	1.1918	0.9698	1.563	1.206	1.1286	0.8806	0.7406	0.1948	0.3406	0.3793	0.1948	0.5052
1478	stearoylcarnitine (C18)	Lipid	Fatty Acid Metabolism(Acyl Carnitine)	34409	LC/MS Pos Late	100001391	1485	428.373	18822-91-8	6426855	21233653		HMDB00848	0.78	0.7639	0.9376	0.917	1.383	0.521	0.6038	0.4403	0.5641	0.8284	1.0624	1.2687	1.0788	1.3743	1.2767	1.1128	0.8607	1.3531	1.2012	1.2743
361	taurine	Amino Acid	Methionine, Cysteine, SAM and Taurine Metabolism	2125	LC/MS Neg	512	690	124.007	107-35-7	1123	1091	C00245	HMDB00251	1.8792	2.1204	2.4681	3.8215	3.4126	1.029	0.9587	0.971	0.6341	0.9557	1.2353	1.9287	1.4195	1.1134	0.966	0.2979	0.19	0.3638	0.1892	0.253
2788	taurochenodeoxycholate	Lipid	Primary Bile Acid Metabolism	18494	LC/MS Neg	1629	5250	498.289	6009-98-9	387316	343282	C05465	HMDB00951	0.9458	0.7795	0.5759	0.5759	0.5759	2.2605	1	2.2625	2.3939	1.801	0.7684	0.7432	1.4856	0.5759	0.7819	0.8628	1.3183	2.1457	2.231	0.9772
1356	tetradecanedioate (C14-DC)	Lipid	Fatty Acid, Dicarboxylate	35669	LC/MS Neg	100001613	4000	257.176	821-38-5	13185	12630		HMDB00872	0.8646	0.9196	0.6143	0.7378	1.0585	1.8407	1.5163	0.6093	0.7518	0.9501	0.9236	0.9794	0.8872	1.4537	1.3246	1.0206	1.2863	1.2835	1.2511	1.5686
3688	thiamin (Vitamin B1)	Cofactors and Vitamins	Thiamine Metabolism	5341	LC/MS Pos Early	873	3050	265.112	59-43-8	1130		C00378	HMDB00235	13.3269	13.5471	14.1267	13.1219	15.2864	1.14	1.0274	1.1542	0.8524	0.7263	0.6248	1.0142	1.1235	0.9858	0.8094	0.8868	0.5011	0.9371	0.728	0.8017
3690	thiamin diphosphate	Cofactors and Vitamins	Thiamine Metabolism	35670	LC/MS Neg	522	1195.1	423.03	154-87-0	1132	8715	C00068	HMDB01372	2.0874	2.5147	2.4962	3.9186	3.246	0.1859	1.0117	0.6486	0.9464	1	0.1859	0.5142	0.1859	0.5244	0.1859	0.1859	0.1859	0.3771	0.1859	0.1859
3689	thiamin monophosphate	Cofactors and Vitamins	Thiamine Metabolism	15798	LC/MS Pos Early	523	2378	345.078	532-40-1	3382778	2627905	C01081	HMDB02666	0.6526	0.8177	0.7834	0.8416	0.6594	1.4905	1.0283	1.6934	1.5136	1.2068	0.5576	0.9737	1.0415	1.2145	0.5748	1.2619	0.6929	1.1137	0.8463	1.0263
4925	thioproline	Xenobiotics	Chemical	53231	LC/MS Pos Early	100009232	1250	134.027	34592-47-4	93176	84120			0.9008	0.967	0.57	0.7245	1.1704	1.0515	1.1701	1.1282	1.1797	1.1433	0.9732	1.0189	0.9811	1.3097	1.105	1.0444	0.617	0.7774	0.7456	0.8634
16	threonine	Amino Acid	Glycine, Serine and Threonine Metabolism	1284	LC/MS Pos Early	564	1514	120.066	72-19-5	6288	6051	C00188	HMDB00167	1.2862	1.3794	1.0543	1.1612	1.4014	1.2584	1.3433	1.7056	1.7675	1.4397	0.5426	0.7334	0.7279	0.7198	0.6178	0.9457	0.4884	0.7385	0.6382	0.7709
785	threonylphenylalanine	Peptide	Dipeptide	31530	LC/MS Neg	100001125	2322	265.119	16875-27-7	4099799	3313819		HMDB29068	0.3398	0.3398	0.3398	0.3398	0.3398	0.3398	0.3398	0.3398	0.3398	0.3398	5.9817	0.3398	0.3398	0.4295	1	0.4006	16.3637	14.6598	0.7436	1.6523
3559	thymidine	Nucleotide	Pyrimidine Metabolism, Thymine containing	2183	LC/MS Neg	872	1963.7	241.083	50-89-5	5789	5585	C00214	HMDB00273	1.0225	2.561	1.2237	1.4323	2.2344	0.3127	1.1917	0.3384	0.4145	1.3961	0.9265	1.2936	0.8545	1.1006	0.9171	0.4019	0.9775	1.3408	0.1957	0.7228
3556	thymidine 3'-monophosphate	Nucleotide	Pyrimidine Metabolism, Thymine containing	37122	LC/MS Neg	100001938	1015	321.049	40705-89-3	5463	5264			0.1501	1.0669	0.1501	0.1501	0.6376	0.1501	0.9331	0.1501	0.1501	2.4327	2.4342	0.9129	0.1501	0.9299	0.8153	0.1501	7.1842	5.8455	0.1501	2.0907
3560	thymine	Nucleotide	Pyrimidine Metabolism, Thymine containing	604	LC/MS Neg	882	1654	125.036	65-71-4	1135	1103	C00178	HMDB00262	5.8895	7.3349	9.3559	10.2293	8.4756	1.1732	1	1.2817	0.4573	1.1444	0.4573	0.7877	0.862	0.5865	0.582	0.7364	0.5816	0.4862	0.4573	0.4573
393	trans-4-hydroxyproline	Amino Acid	Urea cycle; Arginine and Proline Metabolism	32306	LC/MS Pos Early	1001	1064	132.066	51-35-4	5810	5605	C01157	HMDB00725	3.889	3.9219	4.4063	5.1029	4.7988	2.4438	2.3674	2.5993	2.3355	1.8451	0.0674	0.0939	0.0999	0.0908	0.0682	0.1372	0.0715	0.1549	0.1089	0.1149
209	tryptophan	Amino Acid	Tryptophan Metabolism	54	LC/MS Pos Early	565	2986	205.097	73-22-3	6305	6066	C00078	HMDB00929	1.2455	1.3408	1.0993	1.1648	1.4309	1.0394	1.3025	1.2782	1.4011	1.24	0.65	0.9098	0.7845	0.9556	0.7516	0.9606	0.5063	0.9374	0.6285	0.9118
795	tryptophylglycine	Peptide	Dipeptide	43028	LC/MS Neg	100003609	2481	260.104	7360-09-0	263471	231453		HMDB29083	0.1313	0.1313	0.1313	0.1313	0.1313	0.1313	0.1313	0.1313	0.4574	0.1847	1.4499	0.1544	0.188	0.1313	0.5501	1.6659	4.229	3.84	1.8385	1.9554
134	tyrosine	Amino Acid	Tyrosine Metabolism	1299	LC/MS Pos Early	815	2430	182.081	60-18-4	6057	5833	C00082	HMDB00158	1.3103	1.446	0.9534	1.0466	1.5714	1.3017	1.4923	1.9234	1.8312	2.2211	0.6504	0.694	0.7017	0.7169	0.5885	1.0616	0.6283	0.9411	0.7658	0.9059
811	tyrosylglycine	Peptide	Dipeptide	41375	LC/MS Neg	100003598	1635	237.088	673-05-5	259323	227627		HMDB29105	0.2312	0.3855	0.0783	0.0783	0.3268	0.3207	0.8717	0.7652	2.4071	1.7945	5.3502	0.8934	1	0.7356	2.2242	6.6188	16.5156	11.9524	7.5159	6.7929
1094	UDP-galactose	Carbohydrate	Nucleotide Sugar	15860	LC/MS Polar	100000298	4000	565.048	2956-16-3;91183-98-1;137868-52-1	18068	17069	C00052	HMDB00302	1.2144	1.4605	1.7165	1.739	2.0446	1.2125	1.2889	1	1.0038	1.2331	0.4249	0.5756	0.4226	0.4942	0.3094	0.1848	0.1943	0.35	0.1848	0.2461
1090	UDP-glucose	Carbohydrate	Nucleotide Sugar	32344	LC/MS Polar	1096	3950	565.048	117756-22-6	8629	8308	C00029	HMDB00286	1.5801	1.984	1.9194	2.0219	2.5586	1.469	1.4207	1.0189	1	1.3166	0.3545	0.3568	0.3204	0.455	0.2079	0.0285	0.1243	0.2135	0.0285	0.083
1095	UDP-glucuronate	Carbohydrate	Nucleotide Sugar	2763	LC/MS Neg	1097	588	579.027	28053-08-9;63700-19-6	17473	16522	C00167	HMDB00935	4.8072	4.6611	5.429	6.6367	5.5858	2.8164	2.4286	1.6396	1.9244	2.4437	0.2517	0.3604	0.2335	0.305	0.2346	0.0893	0.1114	0.1953	0.0395	0.1339
1101	UDP-N-acetylglucosamine/galactosamine	Carbohydrate	Nucleotide Sugar	46148	LC/MS Polar	100002957	3665	606.074						1.7131	1.9752	2.1793	2.3089	2.5515	1.6482	1.5185	1.2321	1.1789	1.2702	0.5157	0.8211	0.4697	0.7032	0.4512	0.1828	0.3317	0.421	0.0862	0.3206
3509	uracil	Nucleotide	Pyrimidine Metabolism, Uracil containing	605	LC/MS Polar	825	1089.7	111.02	66-22-8	1174	1141	C00106	HMDB00300	3.5456	3.2068	4.2661	4.4863	3.8743	2.5496	1.8955	2.8453	1.6075	1.254	0.2692	0.6495	0.746	0.5334	0.3917	0.5644	0.1399	0.4044	0.3466	0.456
3425	urate	Nucleotide	Purine Metabolism, (Hypo)Xanthine/Inosine containing	1604	LC/MS Neg	1134	757.1	167.021	69-93-2;120K5305	1175		C00366	HMDB00289	0.4529	0.3149	1.0467	1.0069	0.4659	0.9931	1.04	0.9398	0.5017	0.5961	1.9885	5.8062	4.4366	5.2616	2.8214	1.1785	0.2662	0.9416	0.55	1.113
3508	uridine	Nucleotide	Pyrimidine Metabolism, Uracil containing	606	LC/MS Neg	535	1457.6	243.062	58-96-8	6029	5807	C00299	HMDB00296	0.7079	1.1222	0.8754	1.063	1.2233	0.8811	1.5939	0.9598	1.0199	1.5727	0.9737	1.2533	1.0156	1.0939	0.9844	0.7063	0.7387	1.0176	0.5981	0.9523
3505	uridine 3'-monophosphate (3'-UMP)	Nucleotide	Pyrimidine Metabolism, Uracil containing	39764	LC/MS Neg	106	750	323.029	35170-0-7;35170-03-7	101543	91753	C01368		0.3491	1.0271	0.0611	0.0614	0.8722	0.1312	3.0526	0.0679	1.9921	4.982	1.3928	1.0561	0.5766	0.9729	0.4456	1.1535	5.7124	5.4163	0.326	3.2895
3502	uridine 5'-diphosphate (UDP)	Nucleotide	Pyrimidine Metabolism, Uracil containing	5345	LC/MS Neg	870	599.5	402.995	21931-53-3	6031	5809	C00015	HMDB00295	1.9827	2.2193	2.1156	2.3861	2.5111	1.6523	2.2997	1.488	1.8854	2.4215	0.2858	0.512	0.1363	0.2259	0.1473	0.0954	0.3215	0.231	0.1049	0.3022
3503	uridine 5'-monophosphate (UMP)	Nucleotide	Pyrimidine Metabolism, Uracil containing	2856	LC/MS Neg	869	627	323.029	3387-36-8	6030	1399139	C00105	HMDB00288	1.008	1.3015	1.1709	1.4672	1.5424	0.4964	0.992	0.4396	0.774	0.7122	0.4396	0.4396	0.4396	0.4396	0.4396	0.4396	0.4396	0.4396	0.4396	0.4396
3501	uridine 5'-triphosphate (UTP)	Nucleotide	Pyrimidine Metabolism, Uracil containing	33448	LC/MS Neg	871	572	482.961	19817-92-6	6133	5903	C00075	HMDB00285	1.38	1.3323	1.5375	1.324	1.055	0.8338	1.3642	0.826	1	1.0495	0.0768	0.8211	0.0768	0.2968	0.1529	0.0768	0.0768	0.0768	0.0768	0.1266
316	valine	Amino Acid	Leucine, Isoleucine and Valine Metabolism	1649	LC/MS Pos Early	566	2479	118.086	72-18-4	6287	6050	C00183	HMDB00883	1.1202	1.3297	0.8999	0.9136	1.2823	1.1743	1.3156	1.5803	1.8479	1.4053	0.616	0.778	0.7654	0.7734	0.7098	1.3838	0.589	0.9042	0.9239	1.0761
827	valylglutamine	Peptide	Dipeptide	42079	LC/MS Neg	100003640	1484	244.13	42854-54-6	5253209	4419671		HMDB29125	0.1238	0.4636	0.1238	0.1238	0.345	0.298	0.6829	0.4637	1.2856	1.5859	14.51	0.6331	0.3044	0.7144	2.0265	2.9264	47.9964	35.778	5.4556	6.254
828	valylglycine	Peptide	Dipeptide	40475	LC/MS Pos Early	100003641	2444	175.108	686-43-1	136487	120256		HMDB29127	0.0948	0.7081	0.0409	0.0409	0.5418	0.1639	1	0.2231	0.8185	2.4418	1.9951	0.9721	0.4214	1.2026	1.3922	1.4029	4.5969	3.9174	1.58	2.188
831	valylleucine	Peptide	Dipeptide	39994	LC/MS Pos Early	100003210	3138	231.17	22906-55-4	352039	312586		HMDB29131	0.3087	0.4627	0.2384	0.2384	0.4552	0.2542	0.7399	0.48	1.2858	1.3714	43.4454	0.8255	0.5499	1	2.7347	3.19	143.23	103.821	5.5724	5.9816
3417	xanthine	Nucleotide	Purine Metabolism, (Hypo)Xanthine/Inosine containing	3147	LC/MS Polar	1004	2023	151.026	69-89-6	1188	1151	C00385	HMDB00292	0.8791	0.818	1.0979	1.0448	0.998	0.8749	0.8465	0.9096	0.6323	0.6246	1.0458	1.7568	1.5284	1.6638	1.2796	1.0112	0.5092	1.0046	0.5876	1.002
3419	xanthosine	Nucleotide	Purine Metabolism, (Hypo)Xanthine/Inosine containing	15136	LC/MS Neg	100000299	1075	283.068	146-80-5	64959	58484	C01762	HMDB00299	1.5525	1.4113	3.739	4.4195	4.1443	0.412	0.4853	0.3355	0.3133	0.527	0.6429	1.5921	1.117	1.6906	0.5662	1.59	0.5508	1.5635	0.8282	0.883
987	xylulose 5-phosphate	Carbohydrate	Pentose Metabolism	37285	LC/MS Polar	100001968	3955	229.012	105931-44-0	439190	388330	C00231	HMDB00868	2.1922	3.4615	3.4961	3.2446	3.7875	0.8453	0.5865	1	1.012	0.5223	1.9553	0.5936	0.3118	0.8359	0.1701	0.3787	1.2364	1.3692	0.1701	0.439

## Sheet: ProNormImpData (cells HD4)
													SAMPLE_NAME	UNDA-00048	UNDA-00049	UNDA-00050	UNDA-00051	UNDA-00052	UNDA-00053	UNDA-00054	UNDA-00055	UNDA-00056	UNDA-00057	UNDA-00058	UNDA-00059	UNDA-00060	UNDA-00061	UNDA-00062	UNDA-00063	UNDA-00064	UNDA-00065	UNDA-00066	UNDA-00067
													SAMPLE_ID	4917544	4917545	4917546	4917547	4917548	4917549	4917550	4917551	4917552	4917553	4917554	4917555	4917556	4917557	4917558	4917559	4917560	4917561	4917562	4917563
													CLIENT_IDENTIFIER	4T1_Ctrl_1	4T1_Ctrl_2	4T1_Ctrl_3	4T1_Ctrl_4	4T1_Ctrl_5	4T1_KD_1	4T1_KD_2	4T1_KD_3	4T1_KD_4	4T1_KD_5	EpH4_Ctrl_1	EpH4_Ctrl_2	EpH4_Ctrl_3	EpH4_Ctrl_4	EpH4_Ctrl_5	EpH4_KD_1	EpH4_KD_2	EpH4_KD_3	EpH4_KD_4	EpH4_KD_5
													BRADFORD_HD4	10.904	11.819	12.107	12.745	12.635	10.923	9.991	11.662	10.009	10.504	4.297	6.909	5.253	6.312	3.679	4.279	2.597	4.893	3.716	5.421
													CELL_COUNT_X10E6	16.6	13.2	15.2	14.6	16.5	12.6	10.8	12.6	10.7	11	10.1	10.6	13.1	11.6	11.3	12.9	14.8	14.3	14.1	14.9
													CELL_LINE	4T1	4T1	4T1	4T1	4T1	4T1	4T1	4T1	4T1	4T1	EpH4	EpH4	EpH4	EpH4	EpH4	EpH4	EpH4	EpH4	EpH4	EpH4
													GROUP_DESCRIPTION	4T1 Scrambled Ctrl	4T1 Scrambled Ctrl	4T1 Scrambled Ctrl	4T1 Scrambled Ctrl	4T1 Scrambled Ctrl	4T1 Aqp7 knockdown	4T1 Aqp7 knockdown	4T1 Aqp7 knockdown	4T1 Aqp7 knockdown	4T1 Aqp7 knockdown	EpH4 Scrambled Ctrl	EpH4 Scrambled Ctrl	EpH4 Scrambled Ctrl	EpH4 Scrambled Ctrl	EpH4 Scrambled Ctrl	EpH4 Aqp7 knockdown	EpH4 Aqp7 knockdown	EpH4 Aqp7 knockdown	EpH4 Aqp7 knockdown	EpH4 Aqp7 knockdown
													GROUP_NUMBER	1	1	1	1	1	2	2	2	2	2	3	3	3	3	3	4	4	4	4	4
													TREATMENT	Ctrl	Ctrl	Ctrl	Ctrl	Ctrl	Aqp7_KD	Aqp7_KD	Aqp7_KD	Aqp7_KD	Aqp7_KD	Ctrl	Ctrl	Ctrl	Ctrl	Ctrl	Aqp7_KD	Aqp7_KD	Aqp7_KD	Aqp7_KD	Aqp7_KD
PATHWAY_SORTORDER	BIOCHEMICAL	SUPER_PATHWAY	SUB_PATHWAY	COMP_ID	PLATFORM	CHEMICAL_ID	RI	MASS	CAS	PUBCHEM	CHEMSPIDER	KEGG	Group HMDB_ID	4T1_Ctrl	4T1_Ctrl	4T1_Ctrl	4T1_Ctrl	4T1_Ctrl	4T1_Aqp7_KD	4T1_Aqp7_KD	4T1_Aqp7_KD	4T1_Aqp7_KD	4T1_Aqp7_KD	EpH4_Ctrl	EpH4_Ctrl	EpH4_Ctrl	EpH4_Ctrl	EpH4_Ctrl	EpH4_Aqp7_KD	EpH4_Aqp7_KD	EpH4_Aqp7_KD	EpH4_Aqp7_KD	EpH4_Aqp7_KD
3568	(3'-5')-adenylyluridine	Nucleotide	Dinucleotide	52740	LC/MS Neg	100009060	2002	572.115	3051-84-1	112074	100483			0.5743	0.3532	0.3532	0.3532	0.4135	0.3532	1.8153	0.3532	1.8472	1.2938	0.3532	0.4714	1	0.3532	1.1594	1.0791	0.3532	0.7543	1.0763	0.8888
3573	(3'-5')-cytidylyluridine*	Nucleotide	Dinucleotide	62399	LC/MS Neg	100020728	1522	548.104						0.4689	0.4861	0.354	0.354	0.4008	0.354	1.8501	0.354	1.3146	1.0758	0.354	0.5225	1.0967	0.354	1.5332	0.7397	1.4692	1.289	0.354	0.9242
3577	(3'-5')-uridylylcytidine*	Nucleotide	Dinucleotide	62398	LC/MS Neg	100020729	1591	548.104						0.4275	0.3506	0.3506	0.3506	0.3506	0.5816	2.7959	0.3506	2.3134	1.8418	0.3506	0.3506	1	0.3506	2.0848	0.3506	1.4805	0.8351	0.3506	0.8724
3579	(3'-5')-uridylyluridine	Nucleotide	Dinucleotide	52741	LC/MS Neg	100009058	1688	549.088	2415-43-2	102258	92384			0.964	0.8462	0.5013	0.5013	0.8118	0.5013	3.7656	0.5013	2.6867	2.7848	0.5013	0.7875	1.1061	1.0266	3.5161	1.3627	0.5013	0.9734	0.8112	0.5013
432	(N(1) + N(8))-acetylspermidine	Amino Acid	Polyamine Metabolism	57814	LC/MS Pos Early	100016038	3080	188.176						3.9585	4.2471	2.7763	2.4785	4.2901	0.7713	0.996	0.4574	0.9814	0.8074	0.9906	1.004	1.2991	0.8924	1.402	0.9386	1.1801	1.1618	0.8845	0.858
297	1-carboxyethylisoleucine	Amino Acid	Leucine, Isoleucine and Valine Metabolism	62558	LC/MS Neg	100020427	2628	202.108						1.1266	0.9768	0.6536	1.427	1.297	1.3861	0.8318	1.0232	0.7975	0.9192	0.6536	0.6536	0.6536	0.6536	0.6536	0.6536	0.6536	0.6536	0.6536	0.6536
261	1-carboxyethylleucine	Amino Acid	Leucine, Isoleucine and Valine Metabolism	62559	LC/MS Neg	100020425	2663	202.108						0.8381	1.1619	0.6221	0.8286	1.9013	0.7103	0.6221	1.3581	1.2186	0.6221	0.6221	0.6221	0.6221	0.6221	0.6221	0.6221	0.6221	0.6221	0.6221	0.6221
120	1-carboxyethylphenylalanine	Amino Acid	Phenylalanine Metabolism	62566	LC/MS Neg	100020419	2844	236.093			19276386			1	0.7645	0.8624	1.0318	1.3717	0.8777	1.1565	0.7645	0.7645	0.7645	0.7645	0.7645	0.7645	0.7645	0.7645	0.7645	0.7645	0.7645	0.7645	0.7645
3442	1-methyladenine	Nucleotide	Purine Metabolism, Adenine containing	1527	LC/MS Pos Early	54	2133	150.077	5142-22-3	78821	71157	C02216	HMDB11599	2.088	0.7389	5.1019	4.5858	1	0.2121	0.1607	0.1607	0.1607	0.1607	0.1607	0.1607	0.1607	0.1607	0.1607	0.1607	0.1607	0.1607	0.1607	0.1607
66	1-methylhistidine	Amino Acid	Histidine Metabolism	30460	LC/MS Pos Early	100001051	2755	170.092	332-80-9	92105	83153	C01152	HMDB00001	0.9884	1.0679	0.7991	1.0116	1.767	0.735	0.5557	1.0441	0.8212	1.4893	0.5557	0.5557	0.5557	0.5557	0.5557	0.5557	0.5557	0.5557	0.5557	0.5557
1581	13-HODE + 9-HODE	Lipid	Fatty Acid, Monohydroxy	37752	LC/MS Neg	100002196	5275	295.228		43013				1.2681	0.433	1.371	2.0901	0.4209	0.9347	0.3694	0.8451	0.7042	0.1702	0.8767	0.6307	1.1788	0.4235	1.0653	2.7513	4.3158	3.3839	4.2044	1.9257
3548	2'-deoxycytidine	Nucleotide	Pyrimidine Metabolism, Cytidine containing	15949	LC/MS Pos Early	100000125	2193	228.098	951-77-9	13711	13117	C00881	HMDB00014	0.6254	1.3283	0.5263	0.5349	1.1347	0.1232	0.3779	0.1567	0.1728	0.3534	1.6706	1.3827	1.2664	1.4224	1.7551	0.9032	2.6571	2.3845	0.4863	1.0968
3491	2'-deoxyguanosine	Nucleotide	Purine Metabolism, Guanine containing	1411	LC/MS Neg	348	1751	266.089	961-07-9	187790	163230	C00330	HMDB00085	0.7507	1.9763	0.6644	0.7286	1.5404	0.1022	1.0049	0.1118	0.3302	1.1442	1.9222	1.0641	0.9419	0.9951	1.9741	0.4738	4.8623	2.6925	0.336	1.3524
3423	2'-deoxyinosine	Nucleotide	Purine Metabolism, (Hypo)Xanthine/Inosine containing	15076	LC/MS Neg	100000135	1688	251.079	890-38-0	65058	58569	C05512	HMDB00071	0.7716	2.0538	0.7083	0.7828	1.6482	0.1251	0.9665	0.1266	0.2832	0.9612	1.903	1.3498	1.0335	1.3179	1.8344	0.4853	3.9075	2.4773	0.2618	1.2255
3524	2'-deoxyuridine	Nucleotide	Pyrimidine Metabolism, Uracil containing	52602	LC/MS Neg	536	1586	227.067	951-78-0	13712	13118	C00526	HMDB00012	0.8001	1.4661	0.9651	1.0102	1.6567	0.0879	0.2166	0.1405	0.0806	0.2067	1.4041	1.5979	1.703	1.3439	1.375	1.093	0.9898	1.3638	0.5919	0.7997
3549	2'-O-methylcytidine	Nucleotide	Pyrimidine Metabolism, Cytidine containing	57554	LC/MS Pos Early	100010895	2411	258.108	2140-72-9	150971	133067			2.7125	1.0282	6.8183	5.7931	1.5179	4.2777	0.5786	4.5947	0.4921	0.2111	0.2753	0.6091	1.1291	0.7378	1	0.9694	0.2111	0.8065	1.1356	0.7059
1334	2-hydroxyglutarate	Lipid	Fatty Acid, Dicarboxylate	37253	LC/MS Polar	100002070	3352.8	147.03	40951-21-1	43	42	C02630	HMDB00606	5.6237	5.9924	7.6418	8.3424	7.6708	0.6865	0.724	0.582	0.5372	0.5591	1.3199	1.3377	0.9631	1.0714	1.085	0.3919	1.0369	0.7293	0.3112	0.5184
1548	2-hydroxypalmitate	Lipid	Fatty Acid, Monohydroxy	35675	LC/MS Neg	100001579	5511.2	271.228	764-67-0	92836	83805		HMDB31057	0.5233	0.4293	0.5251	0.7506	0.5223	0.3675	0.4617	0.4566	0.3851	0.2973	1.5751	1.3067	1.6925	1.2494	2.1834	1.526	2.3339	1.7969	1.687	1.4012
1550	2-hydroxystearate	Lipid	Fatty Acid, Monohydroxy	17945	LC/MS Neg	1239	5695	299.259	629-22-1	69417	62625	C03045		0.518	0.4356	0.4668	0.8921	0.4832	0.3347	0.3755	0.5274	0.2524	0.2863	1.6144	1.4381	1.9751	1.2942	2.5819	1.3818	1.6859	1.1578	1.2949	1.1079
1164	2-methylcitrate/homocitrate	Energy	TCA Cycle	52282	LC/MS Neg	100008929	575	205.035						1.0508	1.1338	1.1134	1.2407	1.176	0.87	0.8605	0.9543	1	0.8591	0.6346	0.6346	0.6346	0.6346	0.6346	0.6346	0.6346	0.6346	0.6346	0.6346
375	2-oxoarginine*	Amino Acid	Urea cycle; Arginine and Proline Metabolism	55072	LC/MS Pos Early	100002784	1760	174.087	3715-10-04	558	542	C03771	HMDB04225	1.0731	0.6731	1.5254	0.8631	0.6874	1.6658	1	1.9029	1.216	0.6727	0.2779	0.2779	0.2779	0.2779	0.2779	1.5048	0.2779	0.2779	0.8284	0.2779
962	2-phosphoglycerate	Carbohydrate	Glycolysis, Gluconeogenesis, and Pyruvate Metabolism	35629	LC/MS Polar	100000093	4346	184.986	70195-25-4	59	13766841	C00631	HMDB03391	0.3966	0.3496	0.6264	0.4331	0.319	0.5404	1.0103	0.6037	1.0334	1.0331	0.9897	1.2195	1.6385	0.8046	0.8188	2.4178	2.9847	2.5296	2.5676	3.022
3615	3'-dephosphocoenzyme A	Cofactors and Vitamins	Pantothenate and CoA Metabolism	18289	LC/MS Neg	100000138	2013	686.142	3633-59-8	444485	392407	C00882	HMDB01373	1.3236	1.7226	1.0556	0.9444	1.4431	0.6244	2.1437	0.3	0.8357	1.9202	1.4165	1.7832	0.9234	2.7891	2.092	0.2301	0.6545	0.8278	0.2645	0.3123
147	3-(4-hydroxyphenyl)lactate	Amino Acid	Tyrosine Metabolism	32197	LC/MS Neg	240	1379	181.051	6482-98-0	9378	9010	C03672	HMDB00755	1.0416	1.1747	1.2494	1.5692	1.3416	1.2162	0.9032	0.9789	0.8279	0.6869	1.0237	0.9181	1.0973	1.0504	1	0.3728	0.2232	0.4741	0.2232	0.3807
2573	3-hydroxy-3-methylglutarate	Lipid	Mevalonate Metabolism	531	LC/MS Polar	112	2850	161.046	503-49-1	1662	4573695	C03761	HMDB00355	1.2542	1.2416	1.5201	1.6678	1.4917	0.9345	0.9869	0.8522	0.7418	0.6778	1.2114	1.0131	1.201	1.1449	1.173	0.4531	0.6185	0.5365	0.4136	0.3779
1560	3-hydroxydecanoate	Lipid	Fatty Acid, Monohydroxy	22053	LC/MS Neg	100000997	4634.7	187.134	5561-87-5	26612	24790		HMDB02203	2.7969	1.9589	2.0237	2.5217	1.8065	0.2605	0.6908	0.2605	0.2605	0.2803	0.2605	0.2605	1	0.5201	1.1713	0.2605	0.2605	0.9297	0.2605	0.5896
1562	3-hydroxylaurate	Lipid	Fatty Acid, Monohydroxy	32457	LC/MS Neg	100001112	5175	215.165	53941-38-1	94216	85026		HMDB00387	7.1468	4.6066	5.8559	9.1971	5.2006	1.6074	0.9327	0.5938	0.3472	0.5124	0.3472	0.5411	0.8723	0.5178	1.491	0.3472	0.3472	1.1776	1	0.5709
1564	3-hydroxymyristate	Lipid	Fatty Acid, Monohydroxy	21158	LC/MS Neg	100000882	5335	243.197	3422-31-9	16064	15252			4.9588	3.2275	4.6613	7.4353	4.1546	1.6318	1.2077	0.7782	0.4383	0.4871	0.8486	0.7362	0.9096	0.4053	0.8711	0.7388	1.2205	1.1806	1.0904	0.9001
1596	3-hydroxystearate	Lipid	Fatty Acid, Monohydroxy	52938	LC/MS Neg	100008933	5674	299.259	45261-96-9	5282907	4446034			0.6893	0.7071	0.6402	0.6562	0.8111	0.6395	0.995	0.7937	0.8373	0.8676	1.5251	1.1527	1.3394	1.005	2.569	2.1258	4.6119	2.4123	2.3063	1.9171
3540	3-methylcytidine	Nucleotide	Pyrimidine Metabolism, Cytidine containing	35132	LC/MS Pos Early	100001466	2176	258.108	21028-20-6	159649	9164190			1.9271	0.638	4.4847	4.0202	0.7943	1.4416	0.327	1.2057	0.2744	0.1056	0.1056	0.1056	0.1056	0.1056	0.1056	0.1056	0.1056	0.1056	0.1056	0.1056
67	3-methylhistidine	Amino Acid	Histidine Metabolism	15677	LC/MS Pos Early	100000042	2670	170.092	368-16-1	64969	58494	C01152	HMDB00479	1.0251	0.7705	1.8662	1.4942	1.6338	1.4729	0.9749	0.7705	0.7398	0.57	0.57	0.57	0.57	0.57	0.57	0.57	0.57	0.57	0.57	0.57
963	3-phosphoglycerate	Carbohydrate	Glycolysis, Gluconeogenesis, and Pyruvate Metabolism	1414	LC/MS Neg	132	583	184.986	80731-10-8	724	10669764	C00597	HMDB00807	0.2789	0.2055	0.4371	0.3101	0.1762	0.4238	0.6579	0.5159	0.9179	0.6961	1.1307	1.2736	1.5127	1.0821	1.3898	2.5482	1.9898	1.0854	1.6112	1.5883
435	4-guanidinobutanoate	Amino Acid	Guanidino and Acetamido Metabolism	15681	LC/MS Pos Early	100000096	2320	146.092	463-003;463-00-3	500	486	C01035	HMDB03464	1.273	1.0142	1.3821	1.7693	1.4948	1.0911	1.0668	1.4245	0.745	0.9833	0.9858	0.7919	0.9424	0.7725	0.7265	0.3306	0.3306	0.42	1.6972	0.3306
455	4-hydroxy-nonenal-glutathione	Amino Acid	Glutathione Metabolism	48487	LC/MS Neg	100006240	3319.2	462.192	99927-70-5					0.7411	1.0475	0.5926	0.6736	0.8257	0.3367	0.4116	0.1775	0.4561	0.4145	1.6135	1.0865	1.5516	1.1669	1.1001	1.3276	1.2305	1.9427	0.9525	1.0653
85	4-imidazoleacetate	Amino Acid	Histidine Metabolism	32349	LC/MS Pos Early	100001207	2055	127.05	645-65-8	96215	86856	C02835	HMDB02024	1.3142	0.3902	0.8244	0.7347	0.433	1.0099	0.5639	1.1524	1.1083	0.6771	0.3902	1.0153	1.3014	0.9239	1.1081	1.2228	0.6623	1.486	1	0.7523
3511	5,6-dihydrouridine	Nucleotide	Pyrimidine Metabolism, Uracil containing	61833	LC/MS Neg	100001425	1119	245.078	5627-05-04	94312	85115			2.951	2.6461	3.5747	3.9645	2.4357	1.046	1.6529	0.6688	0.6641	1	0.1869	0.3447	0.2188	0.5229	0.829	0.1869	0.1869	0.1869	0.1869	0.1869
101	5-(galactosylhydroxy)-L-lysine	Amino Acid	Lysine Metabolism	43582	LC/MS Pos Early	100002462	2755	325.161	32448-36-5					1.3109	1.0832	1.1795	1.0828	1.037	1.225	0.963	0.9028	1.1087	1.0834	0.4261	0.2971	0.4959	0.3377	0.5942	0.867	1.2805	0.7642	1.0542	0.7407
3550	5-methyl-2'-deoxycytidine	Nucleotide	Pyrimidine Metabolism, Cytidine containing	38159	LC/MS Pos Early	100002300	2303	242.114	838-07-3	440055	389065	C03592	HMDB02224	0.4831	1.829	0.5676	0.585	1.3546	0.3595	0.8274	0.3595	0.3595	0.8794	1.6643	1.0766	0.6924	1.1953	1.7991	0.3595	2.962	2.9796	0.3595	0.9234
3541	5-methylcytidine	Nucleotide	Pyrimidine Metabolism, Cytidine containing	22119	LC/MS Pos Early	100000763	2227	258.108	2140-61-6	92918	83877		HMDB00982	4.7503	2.1118	9.7893	8.9826	2.3066	3.4929	1.2021	3.1718	0.9202	0.6193	0.3666	0.3666	0.8925	0.3666	0.4529	1	0.3666	0.541	0.4681	0.5837
425	5-methylthioadenosine (MTA)	Amino Acid	Polyamine Metabolism	1419	LC/MS Pos Early	212	2752	298.097	2457-80-9	439176	388321	C00170	HMDB01173	1.1001	1.2288	1.1462	1.2351	1.5486	1.0273	0.9727	0.6977	0.7848	0.8559	1.1309	0.9512	1.2353	1.1236	1.2075	0.6319	0.8092	0.7756	0.5927	0.5716
3513	5-methyluridine (ribothymidine)	Nucleotide	Pyrimidine Metabolism, Uracil containing	35136	LC/MS Neg	100001446	1778.1	257.078	1463-10-1	445408	393058		HMDB00884	1	1.2262	2.4961	2.7873	1.5438	0.3405	0.2504	0.2983	0.2504	0.2504	0.2504	0.2504	0.3605	0.2504	0.2504	0.2504	0.2504	0.2504	0.2504	0.2504
447	5-oxoproline	Amino Acid	Glutathione Metabolism	1494	LC/MS Neg	1021	738.5	128.035	98-79-3	7405	7127	C01879	HMDB00267	1.7343	1.6597	1.5845	2.0929	2.1763	1.2126	0.9555	1.1252	0.8712	0.9209	0.9767	0.765	0.9022	0.7353	1.0231	0.9769	1.3448	1.1943	0.9638	0.8506
972	6-phosphogluconate	Carbohydrate	Pentose Phosphate Pathway	15442	LC/MS Neg	100000341	583.9	275.017	921-62-0;53411-70-4	91493	82615	C00345	HMDB01316	0.8649	1.0991	0.4822	0.5391	1.2199	0.2877	0.514	0.2618	0.4457	0.3841	2.2441	4.4096	3.2631	3.5153	1.8867	0.9477	1.0962	1.0523	0.5283	1.1024
2590	7-dehydrocholesterol	Lipid	Sterol	1099	LC/MS Pos Late	264	2467	367.336	434-16-2	439423	388534	C01164	HMDB00032	0.0631	0.0551	0.0692	0.06	0.06	0.035	0.0431	0.0372	0.0439	0.0443	2.8083	1.9308	2.6319	2.097	3.7181	4.6359	6.6005	4.8096	5.4534	3.7957
2632	7-hydroxycholesterol (alpha or beta)	Lipid	Sterol	47890	LC/MS Pos Late	100005999	1930	367.336		107722			HMDB06119	0.5885	0.5686	0.6234	0.5499	0.5684	0.325	0.3628	0.3582	0.3742	0.3609	2.123	1.3766	1.8417	1.5167	2.6766	2.1687	3.2643	2.3051	2.591	1.6962
3477	7-methylguanine	Nucleotide	Purine Metabolism, Guanine containing	35114	LC/MS Pos Early	100001456	2175	166.072	578-76-7	11361	10883	C02242	HMDB00897	3.5543	2.3285	6.2754	5.9009	2.4214	1.3197	1.3691	1.094	0.7604	1.0528	0.4508	0.7477	0.7555	0.8623	1.072	0.6061	0.6977	0.9472	0.478	0.5635
1459	acetylcarnitine (C2)	Lipid	Fatty Acid Metabolism(Acyl Carnitine)	32198	LC/MS Pos Early	100000802	2282	204.123	5080-50-2	1	5406074	C02571	HMDB00201	0.7518	0.625	0.5687	0.7224	1.0094	1.2436	0.9906	1.227	1.0593	1.398	1.8855	1.5783	1.6146	1.5474	1.8337	0.5555	0.7769	0.6863	0.5806	0.6215
1166	acetylphosphate	Energy	Oxidative Phosphorylation	15488	LC/MS Polar	1211	4013.9	138.98	94249-01-1	186	181	C00227	HMDB01494	1.167	1.0381	1.0084	0.9147	0.9916	0.6691	0.6629	0.6621	0.9645	0.5948	1.7233	1.2381	1.2664	1.2879	1.2611	1.2594	1.6754	0.9085	0.8733	0.8066
1145	aconitate [cis or trans]	Energy	TCA Cycle	46173	LC/MS Neg	100001359	580	173.009						0.0851	0.3433	0.0351	0.0381	0.2015	0.1265	0.2455	0.0626	0.1038	0.3139	4.1805	1.6567	1.7096	1.9746	4.1377	2.152	5.0583	2.6125	2.5222	1.9001
3441	adenine	Nucleotide	Purine Metabolism, Adenine containing	554	LC/MS Pos Early	880	2221	136.062	73-24-5	190	185	C00147	HMDB00034	3.2561	2.5054	2.6392	2.3685	2.0701	0.3571	0.5244	0.305	0.3266	0.6063	0.6933	0.533	1.3067	0.5284	1.9185	1.5137	2.7408	0.5963	2.5801	0.4851
3440	adenosine	Nucleotide	Purine Metabolism, Adenine containing	555	LC/MS Pos Early	798	2169	268.104	58-61-7	60961	54923	C00212	HMDB00050	1.0274	0.6704	0.8146	0.7359	0.7513	0.9423	0.6513	0.5194	0.6077	0.5449	1.1933	0.9726	1.5621	1.1247	2.7542	2.1794	4.1428	2.1803	2.8913	1.7798
3435	adenosine 2'-monophosphate (2'-AMP)	Nucleotide	Purine Metabolism, Adenine containing	36815	LC/MS Neg	100001694	1497.7	346.056	130-49-4	94136		C00946	HMDB11617	0.3089	2.207	0.0748	0.1793	2.0728	0.1329	5.297	0.0902	1.4481	5.7058	0.5519	0.2208	0.0748	0.2208	0.0748	0.0748	8.6556	4.1736	0.0748	2.118
3438	adenosine 3',5'-diphosphate	Nucleotide	Purine Metabolism, Adenine containing	15691	LC/MS Neg	1214	575	426.022	75431-54-8	159296	19951095	C00054	HMDB00061	1.1071	3.062	0.4582	0.5595	2.4823	1	1.6997	0.8637	1.3112	1.0398	0.3014	0.3014	0.3014	0.3014	0.3014	0.3014	0.3014	0.8835	0.3014	0.976
3434	adenosine 3'-monophosphate (3'-AMP)	Nucleotide	Purine Metabolism, Adenine containing	35142	LC/MS Neg	100001449	1245	346.056	84-21-9	41211	10463793	C01367	HMDB03540	0.0891	0.1893	0.0891	0.0891	0.1048	0.0891	4.4951	0.0891	1	5.4148	2.1115	0.4503	0.0891	0.629	0.7491	0.0891	22.0665	7.4216	0.0891	2.5599
3606	adenosine 5'-diphosphoribose (ADP-ribose)	Cofactors and Vitamins	Nicotinate and Nicotinamide Metabolism	558	LC/MS Neg	215	920	558.064	68414-18-6	192	3674071	C00301	HMDB01178	0.6387	0.6911	0.2543	0.2401	1	0.1111	1.1438	0.0366	1.1591	1.4026	1.8524	1.3894	1.1842	1.8904	2.124	0.2597	1.0583	0.9143	0.0366	0.6766
3433	adenosine 5'-monophosphate (AMP)	Nucleotide	Purine Metabolism, Adenine containing	32342	LC/MS Pos Early	209	1013	348.07	149022-20-8	6083	10239183	C00020	HMDB00045	1.2654	1.1673	1.2907	1.4643	1.2221	1.0367	2.0335	0.6053	0.9484	2.145	0.8068	0.4303	0.4392	0.6935	0.9633	0.3995	4.6626	2.0179	0.4515	0.931
28	alanine	Amino Acid	Alanine and Aspartate Metabolism	1126	LC/MS Pos Early	811	1700	90.055	56-41-7	5950	5735	C00041	HMDB00161	0.8571	0.8182	0.7325	0.7472	0.8298	0.9022	1.0709	1.0568	1.2656	0.9546	1.0251	0.7673	0.9749	0.8479	1.3738	2.0231	1.4805	1.4244	1.7946	1.4392
490	alanylleucine	Peptide	Dipeptide	37093	LC/MS Pos Early	100001890	3055	203.139	1638-60-4	259583	227831		HMDB28691	0.0409	0.0409	0.0409	0.0409	0.0409	0.0409	0.0409	0.0409	0.0517	0.0409	4.2295	0.0409	0.0409	0.0409	0.2875	0.5153	42.9882	13.944	1.1664	1
3427	allantoin	Nucleotide	Purine Metabolism, (Hypo)Xanthine/Inosine containing	1107	LC/MS Polar	1002	1672	157.037	97-59-6	204	199	C02350	HMDB00462	1.5648	1.4538	2.1924	2.451	1.8353	0.8857	0.817	0.9032	0.7917	0.6882	0.8734	1.1518	1.2256	0.7807	1.0968	0.802	1.1687	1.2035	0.7918	0.798
43	alpha-ketoglutaramate*	Amino Acid	Glutamate Metabolism	62101	LC/MS Polar	100002397	1916	144.03	18465-19-5					1.0341	1.0716	0.996	1.2002	1.2755	0.4772	0.9267	0.7076	0.8548	0.8413	0.4772	0.9679	1.1086	0.9185	1.004	1.0626	0.4772	1.186	1.1759	0.8819
1149	alpha-ketoglutarate	Energy	TCA Cycle	528	LC/MS Polar	93	2700	145.014	305-72-6;328-50-7;22202-68-2	51	50	C00026	HMDB00208	1.3729	1.4085	1.4913	1.7564	1.9041	0.5948	0.5767	0.6517	0.4504	0.2886	1.2679	1.1751	1.3143	1.0724	1.5005	0.9276	0.7562	0.5767	0.7098	0.425
3631	alpha-tocopherol	Cofactors and Vitamins	Tocopherol Metabolism	1561	LC/MS Pos Late	1105	2522	430.378	59-02-9;10191-41-0	14985	14265	C02477	HMDB01893	0.9483	0.7203	1.2061	0.833	1.0345	1.1054	1.0127	1	1.0337	1.0769	1.1454	0.8258	1.2218	0.9528	1.2072	0.5734	0.3352	0.4219	0.7983	0.3352
1006	arabitol/xylitol	Carbohydrate	Pentose Metabolism	48885	LC/MS Polar	100006430	1932.4	151.061		6912		C01904		1.0609	0.8983	1.7812	1.5878	1.441	0.9671	0.8637	0.9532	0.6213	0.4877	0.4877	1	1.1706	0.4877	1.0645	0.4877	0.4877	0.4877	0.4877	0.4877
1495	arachidoylcarnitine (C20)*	Lipid	Fatty Acid Metabolism(Acyl Carnitine)	57513	LC/MS Pos Late	100015833	1512	456.405			28639199		HMDB06460	0.2416	0.212	0.276	0.2161	0.3303	0.3245	0.3369	0.3708	0.3562	0.212	1.2241	1	1.2136	1.1461	1.5974	1.7016	1.8504	2.0238	2.3557	1.3586
368	arginine	Amino Acid	Urea cycle; Arginine and Proline Metabolism	1638	LC/MS Pos Early	231	2825	175.119	1119-34-2	232	227	C00062	HMDB00517	0.8575	0.7934	0.703	0.6492	0.7697	0.9717	1.0093	1.1066	1.3003	0.9824	1.1605	0.6877	0.9907	0.7487	1.4048	2.2811	2.4077	1.7507	2.0873	1.4876
369	argininosuccinate	Amino Acid	Urea cycle; Arginine and Proline Metabolism	15497	LC/MS Pos Early	232	2745	291.13	156637-58-0	828	805	C03406	HMDB00052	4.7065	3.9364	3.2768	4.3656	6.5136	1.0246	0.508	0.9754	0.4516	0.3262	0.4236	0.835	1.2253	0.9082	0.3262	0.3262	0.3262	0.3262	0.3262	0.3262
38	asparagine	Amino Acid	Alanine and Aspartate Metabolism	512	LC/MS Pos Early	917	1225	133.061	70-47-3	6267	6031	C00152	HMDB00168	1.182	1.0922	0.8434	0.985	1.0139	0.9511	1.2055	0.9861	1.3501	1.1128	0.6298	0.6208	0.894	0.6323	1.0262	1.5271	1.0521	0.8066	1.0935	0.8761
34	aspartate	Amino Acid	Alanine and Aspartate Metabolism	443	LC/MS Pos Early	234	1165	134.045	56-84-8	5960	5745	C00049	HMDB00191	1.1893	0.8867	1.2948	1.2958	1.0145	0.3839	0.314	0.4388	0.4177	0.2803	1.2459	1.134	1.4255	1.127	1.3693	1.0157	0.9855	0.8007	0.8646	0.7005
3732	benzoate	Xenobiotics	Benzoate Metabolism	15778	LC/MS Neg	100000008	1750	121.029	65-85-0	243	238	C00180	HMDB01870	0.5834	0.512	0.512	0.512	0.6731	0.512	0.9416	0.7414	0.8823	0.512	0.512	0.512	1.0584	0.512	2.5362	2.1813	0.512	1.4477	2.0693	1.3065
3528	beta-alanine	Nucleotide	Pyrimidine Metabolism, Uracil containing	55	LC/MS Pos Early	244	1905	90.055	56-41-7;107-95-9	239	234	C00099	HMDB00056	0.8733	0.7542	0.8951	0.9732	1.0037	0.7332	0.7276	0.7885	0.7906	0.8134	1.7141	1.2849	1.6588	0.9963	1.8576	1.3187	1.3205	1.1857	1.4266	1.1524
278	beta-hydroxyisovalerate	Amino Acid	Leucine, Isoleucine and Valine Metabolism	12129	LC/MS Polar	1442	1149.8	117.056	625-08-1	69362	62571		HMDB00754	0.77	0.8958	0.8621	1.0111	1	2.1888	1.3222	2.3002	1.4762	0.9734	0.77	0.77	0.77	0.77	0.77	0.8813	0.77	0.77	0.77	0.77
6	betaine	Amino Acid	Glycine, Serine and Threonine Metabolism	3141	LC/MS Pos Early	799	1064	118.086	107-43-7	247	24219951173	C00719	HMDB00043	0.6826	0.6784	0.8819	0.9678	0.9225	0.5125	0.6239	0.4439	0.4247	0.3925	5.1678	4.5914	4.7688	4.2151	4.6711	1.5197	1.1045	1.4245	1.0322	1.1918
3676	bilirubin (Z,Z)	Cofactors and Vitamins	Hemoglobin and Porphyrin Metabolism	43807	LC/MS Pos Late	1090	1840	585.271	635-65-4	5280352	4444055	C00486	HMDB00054	0.3735	0.3642	0.4124	0.4218	0.3695	0.6317	0.6755	0.3642	0.7258	0.722	1.9974	1	1.3847	1.3129	2.0421	2.7774	3.5572	2.5676	2.289	1.7894
3655	biotin	Cofactors and Vitamins	Biotin Metabolism	568	LC/MS Pos Early	251	2253	245.095	58-85-5	171548	149962	C00120	HMDB00030	1.2402	0.8849	1.1009	1	1.1355	0.0826	0.0826	0.1275	0.0826	0.0826	0.0826	0.0826	0.0826	0.0826	0.0826	0.0826	0.0826	0.0826	0.0826	0.0826
216	C-glycosyltryptophan	Amino Acid	Tryptophan Metabolism	48782	LC/MS Neg	100006379	1777	365.135	180509-18-6	10981970	9157171			0.4162	0.3903	0.4619	0.491	0.4823	0.3552	0.3636	0.4187	0.3382	0.3382	1.1787	1	1.261	1.2413	1.5735	1.4984	1.8258	1.596	2.1271	1.3166
2615	campesterol	Lipid	Sterol	33997	LC/MS Pos Late	100001269	2873	383.367	474-62-4	173183	151215	C01789	HMDB02869	0.7032	0.7032	0.7443	1	0.7032	0.7032	0.7032	0.7032	0.7032	0.7032	0.7032	0.7032	1.0722	0.7032	0.7032	0.7032	0.7032	1.5274	0.7032	0.7032
1520	carnitine	Lipid	Carnitine Metabolism	15500	LC/MS Pos Early	100000007	1978	162.112	461-05-2	10917	10455	C00318	HMDB00062	1.4568	1.693	1.388	1.761	2.0298	1.0236	1.2677	0.9722	0.9911	1.0202	0.826	0.8484	1.0914	0.8064	1.0089	0.4937	0.4928	0.5551	0.6045	0.453
1512	cerotoylcarnitine (C26)*	Lipid	Fatty Acid Metabolism(Acyl Carnitine)	57516	LC/MS Pos Late	100015835	1649	540.499			35015992		HMDB06347	0.7269	0.6885	0.5545	0.3459	0.7703	0.3459	0.5536	0.525	0.6373	0.5877	1.4838	1	1.3893	1.1382	1.8266	1.517	2.4393	1.6482	1.4806	1.2434
2588	cholesterol	Lipid	Sterol	63	LC/MS Pos Late	266	2707	369.352	57-88-5	11025495	4937803	C00187	HMDB00067	0.7343	0.7351	0.8079	0.6457	0.6974	0.8013	0.8531	0.8397	1.1494	0.8705	1.4352	1.006	1.3697	0.994	1.7978	1.768	2.6711	1.7412	1.8985	1.4068
1760	choline	Lipid	Phospholipid Metabolism	15506	LC/MS Pos Early	1256	1961	104.107	67-48-1	305	149278	C00114	HMDB00097	0.9334	0.5324	1.2765	1.2495	0.6393	0.862	0.3328	0.7188	0.4507	0.2533	1.1641	1.0574	1.6055	1.0443	1.7092	1.1687	1.1507	0.9557	1.2542	0.811
1761	choline phosphate	Lipid	Phospholipid Metabolism	34396	LC/MS Pos Early	267	700	184.073	72556-74-2	1014	119298	C00588	HMDB01565	0.9807	0.9616	0.9792	1.0492	0.9816	0.6763	0.7874	0.5157	0.664	0.6148	1.7275	1.4324	1.5961	1.3749	1.7599	1.2495	1.4859	1.2194	0.9735	1.0184
1143	citrate	Energy	TCA Cycle	1564	LC/MS Neg	1124	582	191.02	77-92-9	311	305	C00158	HMDB00094	0.1587	0.4074	0.08	0.0817	0.2881	0.1634	0.2416	0.086	0.1258	0.3002	3.711	1.5926	1.9563	1.7769	3.7924	2.2933	4.9173	2.6181	2.6534	1.9291
376	citrulline	Amino Acid	Urea cycle; Arginine and Proline Metabolism	2132	LC/MS Pos Early	391	1520	176.103	372-75-8	9750	810	C00327	HMDB00904	0.8544	0.6653	0.9746	0.988	0.844	1.1865	0.7705	1.0637	0.9832	0.679	0.8724	1.012	2.1569	0.9513	1.3816	9.1141	2.0753	2.2478	6.2877	3.2025
457	CoA-glutathione*	Amino Acid	Glutathione Metabolism	62804	LC/MS Neg	269	1326	535.084	6477-52-7	11953788	10128089	C00920		4.3467	6.5821	5.9931	6.3183	7.2991	0.7691	2.9722	0.5317	0.8811	2.5464	0.5317	1	0.5423	0.843	0.5317	0.5317	0.5317	0.7505	0.5317	0.6864
3617	coenzyme A	Cofactors and Vitamins	Pantothenate and CoA Metabolism	46322	LC/MS Neg	270	1448	382.55	85-61-0;18439-24-2	317	311	C00010	HMDB01423	1.997	3.881	2.1792	2.3063	3.6394	0.9417	2.7851	0.5571	1	1.7672	0.6533	1.1583	0.8831	1.1144	0.4877	0.3573	0.2232	0.4285	0.2232	0.7164
407	creatine	Amino Acid	Creatine Metabolism	27718	LC/MS Pos Early	1221	1947	132.077	57-00-1	586	566	C00300	HMDB00064	1.5154	1.5409	1.4294	1.4806	1.6442	1.0604	1.1768	0.9425	0.9982	0.9266	1.0018	0.8365	1.0163	0.8612	1.016	0.6648	0.5927	0.6733	0.5706	0.547
409	creatine phosphate	Amino Acid	Creatine Metabolism	33951	LC/MS Neg	100000112	603	210.029	922-32-7	587	567	C02305	HMDB01511	0.1801	0.1801	0.1801	0.1801	0.1801	0.3256	0.3171	0.2914	0.2745	0.5194	1.4316	1.5294	1.3138	1.4845	0.968	1.1664	1.032	1.362	0.5647	1.1942
408	creatinine	Amino Acid	Creatine Metabolism	513	LC/MS Pos Early	275	2055	114.066	60-27-5	588	568	C00791	HMDB00562	1.7412	1.8875	2.014	1.8457	1.6304	1.1213	0.8936	1.002	0.9817	0.8342	0.998	0.9383	1.1203	0.9654	1.0137	1.0935	0.7877	0.9864	0.804	0.7553
348	cysteine	Amino Acid	Methionine, Cysteine, SAM and Taurine Metabolism	1868	LC/MS Pos Early	800	1488	122.027	52-90-4;56-89-3	5862	5653	C00097	HMDB00574	0.723	0.8904	0.7499	0.6432	0.7501	0.7113	0.9351	0.7827	0.9887	1.0113	1.54	0.876	1.25	1.072	1.7664	1.3188	1.2228	1.0123	1.3676	1.0749
441	cysteine-glutathione disulfide	Amino Acid	Glutathione Metabolism	35159	LC/MS Pos Early	100001437	2465	427.095	13081-14-6	4247235	3455404		HMDB00656	0.6538	0.4763	0.8079	0.6312	0.4477	0.8738	0.9478	1.0522	1.1243	1.0551	1.2083	0.3887	0.8163	0.4776	1.3236	2.0123	3.9346	2.3196	2.4059	1.6273
444	cysteinylglycine	Amino Acid	Glutathione Metabolism	35637	LC/MS Pos Early	278	2132	179.048	19246-18-5	439498	58762	C01419	HMDB00078	0.6188	0.9594	1	0.6063	0.9342	0.3535	0.3535	0.3535	0.3535	0.3535	3.4482	1.0997	0.8075	1.0535	1.8703	0.3535	2.4333	1.4506	0.3535	0.3535
3538	cytidine	Nucleotide	Pyrimidine Metabolism, Cytidine containing	514	LC/MS Pos Early	827	2124	244.093	65-46-3	6175	5940	C00475	HMDB00089	0.9507	0.8277	0.8731	0.8572	0.7847	1.2407	1.0632	1.2703	1.1085	0.7635	0.9878	0.6737	1.0217	0.7125	1.212	1.3171	1.3343	1.0638	1.0122	0.9395
1762	cytidine 5'-diphosphocholine	Lipid	Phospholipid Metabolism	34418	LC/MS Polar	1220	4200	533.106	33818-15-4	13804	21531769	C00307	HMDB01413	1	1.3348	1.4732	1.549	1.6445	0.2062	0.2062	0.2062	0.2062	0.2062	0.2062	0.6952	0.495	0.6425	0.2062	0.2062	0.2062	0.2062	0.2062	0.2062
3534	cytidine 5'-monophosphate (5'-CMP)	Nucleotide	Pyrimidine Metabolism, Cytidine containing	2372	LC/MS Pos Early	282	835	324.059	63-37-6	6131	5414497	C00055	HMDB00095	0.9038	0.8279	0.9654	1.119	0.8234	0.7832	0.4968	0.5814	0.4774	0.4408	1.4801	1.2361	1.5631	1.3637	1.7968	1.3856	1.1782	1.0346	1.2591	0.8494
1102	cytidine 5'-monophospho-N-acetylneuraminic acid	Carbohydrate	Nucleotide Sugar	36831	LC/MS Polar	1223	3900	613.14	3063-71-6	448209		C00128	HMDB01176	0.7966	0.7053	0.5679	0.3517	0.2686	0.2686	0.2686	0.2686	0.3879	0.2686	1.6669	1.2034	0.2686	0.2686	0.2686	0.2686	3.1539	2.222	1.5994	1.3434
3533	cytidine diphosphate	Nucleotide	Pyrimidine Metabolism, Cytidine containing	2841	LC/MS Neg	280	580	402.011	34393-59-4	6132	5902	C00112	HMDB01546	1.4565	1.1984	1.1861	1.2302	1.2258	0.3673	0.7238	0.198	0.3065	0.8139	0.198	0.198	0.198	0.198	0.198	0.198	0.198	0.198	0.198	0.198
3539	cytosine	Nucleotide	Pyrimidine Metabolism, Cytidine containing	573	LC/MS Pos Early	881	2060	112.051	71-30-7	597	577	C00380	HMDB00630	0.8208	0.8374	0.8948	0.4383	0.4383	0.8457	1	1.2186	0.7418	0.9068	0.4383	0.4383	1.2005	1.1041	3.0426	1.5057	0.4383	0.4383	2.3286	1.3581
1519	deoxycarnitine	Lipid	Carnitine Metabolism	36747	LC/MS Pos Early	100001662	2052	146.118	6249-56-5	134	705	C01181	HMDB01161	1.3988	0.8998	1.1713	1.4354	1.7976	0.7535	0.8085	0.8011	0.5562	0.7407	1.7433	1.6817	2.3933	1.7021	2.5835	0.7641	0.5469	1	0.5469	0.857
958	dihydroxyacetone phosphate (DHAP)	Carbohydrate	Glycolysis, Gluconeogenesis, and Pyruvate Metabolism	15522	LC/MS Pos Early	309	539	171.005	102783-56-2	668	3833110	C00111	HMDB01473	1.6198	1.4878	2.1312	2.0673	1.2876	1.0431	1.1325	0.9569	1.3377	0.7992	0.2141	0.482	0.4886	0.4512	0.6878	1.0695	1.1058	0.877	0.8673	0.9314
382	dimethylarginine (SDMA + ADMA)	Amino Acid	Urea cycle; Arginine and Proline Metabolism	36808	LC/MS Pos Early	100001810	2850	203.15	102783-24-4	123831	110375	C03626	HMDB01539	1.3465	1.0933	0.9977	1.0023	1.2003	1.2777	1.5688	1.3889	1.9413	1.4203	0.2711	0.2587	0.4589	0.2358	0.5323	1.7103	0.6576	0.6124	0.9664	0.7733
1355	dodecanedioate (C12-DC)	Lipid	Fatty Acid, Dicarboxylate	32388	LC/MS Neg	100001102	2990	229.145	693-23-2	12736	12213	C02678	HMDB00623	0.7418	0.8336	0.4258	0.4901	0.6846	0.8863	1.3567	0.4088	0.3244	0.4168	0.9842	1.0158	1.0813	1.7803	3.7772	1.7952	2.8666	1.8879	3.0605	1.9178
2567	eicosanoylsphingosine (d20:1)*	Lipid	Sphingosines	57597	LC/MS Pos Late	100015870	1443	328.321						0.6996	0.6554	0.6984	0.5947	0.6957	0.4618	0.567	0.469	0.6172	0.6328	2.1124	1.3004	1.7417	1.3315	2.3963	2.7253	3.9335	2.8019	3.4332	2.4631
1391	eicosenamide (20:1)*	Lipid	Fatty Acid, Amide	62445	LC/MS Pos Late	100020764	1800	310.31		5365374	4517402			0.616	0.7469	0.8759	0.5683	0.7367	0.5529	0.6787	0.6733	0.8768	1.4562	2.0368	0.9921	1.4206	1.0079	1.8526	1.8818	9.3229	1.6071	2.3624	1.4386
1502	eicosenoylcarnitine (C20:1)*	Lipid	Fatty Acid Metabolism(Acyl Carnitine)	57519	LC/MS Pos Late	100015838	1484	454.389						0.687	0.4201	0.6993	0.4027	0.6523	0.5647	0.6276	0.5712	0.724	1	1.7943	1.2491	1.0195	1.5802	0.4027	2.2096	2.2443	2.166	2.7047	1.5603
4037	ergothioneine	Xenobiotics	Food Component/Plant	37459	LC/MS Pos Early	100002154	850	230.096	58511-63-0	3032311	2297320	C05570	HMDB03045	0.8754	0.9149	1.2281	2.6562	1.193	0.9559	0.9263	0.3169	0.467	1	1.204	1.1661	1.7927	0.7552	1.1537	0.3169	0.3169	0.3169	0.3169	0.3169
1393	erucamide	Lipid	Fatty Acid, Amide	35177	LC/MS Pos Late	100001444	1972	338.342	112-84-5	5365371	4517399			0.511	0.7462	1.1319	0.8056	1.0644	0.488	0.6945	0.8146	0.9356	1.3165	1.7005	0.6703	1.0969	0.5063	1.3271	1.1584	7.2365	0.8445	1.7492	1.1798
1136	erythronate*	Carbohydrate	Aminosugar Metabolism	42420	LC/MS Polar	100001320	2186	135.03	88759-55-1	2781043	2061231		HMDB00613	2.1279	2.0238	3.057	3.2338	2.9415	0.9199	1.0135	0.9278	0.7261	0.7389	1.1472	1.2589	1.4861	0.9865	1.5338	0.6308	0.8608	0.9541	0.7629	0.5687
309	ethylmalonate	Amino Acid	Leucine, Isoleucine and Valine Metabolism	15765	LC/MS Polar	2054	2785	131.035	601-75-2	11756	11263		HMDB00622	1.5308	1.1892	1.3966	1.5567	1.8237	0.7089	0.8108	0.5514	0.6312	0.6409	0.5514	0.5514	0.5514	0.5514	0.5514	0.5514	0.5514	0.5514	0.5514	0.5514
3610	flavin adenine dinucleotide (FAD)	Cofactors and Vitamins	Riboflavin Metabolism	2134	LC/MS Neg	327	2425	784.15	146-14-5;84366-81-4	643975	559059	C00016	HMDB01248	1.0858	1.0561	1.0426	1.0431	1.0448	0.9692	0.8746	0.7454	0.8683	0.8356	0.9766	0.8746	1.0234	0.8692	1.43	0.9276	1.2095	1.0701	1.1787	0.8007
3611	flavin mononucleotide (FMN)	Cofactors and Vitamins	Riboflavin Metabolism	15797	LC/MS Neg	100000251	2390	455.097	130-40-5	710	690	C00061	HMDB01520	3.8913	2.9297	4.1986	3.872	3.2227	1	0.8326	0.6824	0.6013	0.5717	0.8767	0.928	1.3636	0.9784	0.8768	1.1676	0.5717	1.1923	1.6799	0.9779
1059	fructose	Carbohydrate	Fructose, Mannose and Galactose Metabolism	48195	LC/MS Polar	878	2065	225.062	57-48-7	5984	5764	C00095	HMDB00660	1.2673	0.9395	1.4424	1.1076	1.0287	1.3935	0.6529	1.5788	0.9349	0.5558	0.907	0.8321	1.3227	0.8033	1.7023	0.9713	1.8039	0.7637	1.5318	0.8155
956	fructose 1,6-diphosphate/glucose 1,6-diphosphate/myo-inositol diphosphates	Carbohydrate	Glycolysis, Gluconeogenesis, and Pyruvate Metabolism	46896	LC/MS Neg	100002180	551	338.989				C00354		1.0087	1.4736	1.4509	1.5307	1.348	1.3467	2.0498	0.9913	1.6531	1.8617	0.4781	0.4285	0.2823	0.4642	0.343	0.5227	1.4786	0.728	0.3866	0.6649
1153	fumarate	Energy	TCA Cycle	1643	LC/MS Polar	330	3084	115.004	100-17-8	444972	10197150	C00122	HMDB00134	2.0692	1.7535	2.1239	2.4166	2.3666	0.5664	0.3829	0.4847	0.2838	0.2249	1.1417	1.3029	1.6447	1.1974	1.4118	0.8563	0.6369	0.8583	0.6013	0.657
1085	galactonate	Carbohydrate	Fructose, Mannose and Galactose Metabolism	27719	LC/MS Polar	100001026	3085	195.051	299-28-5	128869	114198	C00880	HMDB00565	1	1.2948	1.9476	2.2846	1.7061	1.0697	0.9073	0.7132	0.5909	0.5218	0.4922	0.4082	0.4082	0.4082	1.3489	0.4082	0.4082	0.4082	0.4082	0.4082
470	gamma-glutamyl-epsilon-lysine	Peptide	Gamma-glutamyl Amino Acid	33934	LC/MS Pos Early	100001262	2725	276.155	17105-15-6	7015685	5378717		HMDB03869	0.4518	0.4008	0.4505	0.4315	0.5033	0.3855	0.4079	0.3393	0.4428	0.5632	1.9747	1.4368	2.0794	1.4713	2.2862	4.2642	7.2644	4.296	4.7709	3.5325
462	gamma-glutamylcysteine	Peptide	Gamma-glutamyl Amino Acid	1778	LC/MS Pos Early	1036	2118	251.07	636-58-8	842	819	C00669	HMDB01049	1.4516	1.741	1.2511	1.3682	2.1367	0.3058	0.4452	0.2826	0.4124	0.2868	1.7024	2.5996	3.4	2.9776	2.5247	0.7489	0.1449	0.4939	0.6191	0.5382
463	gamma-glutamylglutamate	Peptide	Gamma-glutamyl Amino Acid	36738	LC/MS Pos Early	331	1775	277.103	1116-22-9	92865	83831	C05282	HMDB11737	0.3874	0.3139	0.9095	0.9091	0.4845	0.7819	0.5138	0.7005	0.4383	0.3668	1.0924	1.2559	1.9302	1.2836	1.8169	1.2194	1.0905	1.3098	1.3526	1.191
464	gamma-glutamylglutamine	Peptide	Gamma-glutamyl Amino Acid	2730	LC/MS Pos Early	1140	1430	276.119	10148-81-9	150914	133013	C05283	HMDB11738	0.1673	0.1133	0.1133	0.1133	0.1421	0.3335	0.6103	0.7213	1.2765	0.4919	1.0901	1.2701	2.956	1.0855	2.8925	3.4635	0.9145	0.8195	2.7699	1.5231
465	gamma-glutamylglycine	Peptide	Gamma-glutamyl Amino Acid	33949	LC/MS Pos Early	100001294	1535	205.082	1948-29-4	165527	145071		HMDB11667	0.0462	0.0462	0.1182	0.0462	0.0462	0.0462	0.0462	0.0463	0.0462	0.0462	1	1.157	1.4494	1.1476	1.266	0.0462	0.0462	0.1042	0.0462	0.0462
467	gamma-glutamylisoleucine*	Peptide	Gamma-glutamyl Amino Acid	34456	LC/MS Pos Early	100001485	2940	261.144		14253342	21403145		HMDB11170	0.4868	0.4718	0.5776	0.4893	0.5096	0.1606	0.1606	0.1606	0.1606	0.1606	3.1731	4.2082	5.0446	4.7515	4.4763	1.1903	0.1606	1.1696	0.8364	1
468	gamma-glutamylleucine	Peptide	Gamma-glutamyl Amino Acid	18369	LC/MS Neg	1268	1685	259.13	2566-39-4	151023	133115		HMDB11171	0.1571	0.2299	0.284	0.2651	0.2479	0.1571	0.1571	0.1571	0.1571	0.1571	4.3186	4.5013	4.6393	4.3148	4.2196	1.0396	0.1571	1.0773	0.9604	0.8853
471	gamma-glutamylmethionine	Peptide	Gamma-glutamyl Amino Acid	44872	LC/MS Pos Early	100001313	2640	279.101	17663-87-5	7009567	5373147		HMDB29155	0.4741	0.4741	0.4741	0.4741	0.4741	0.5461	0.4741	0.8811	1	0.4741	0.6532	0.578	1.2263	0.4741	2.2718	4.4209	0.4741	0.4741	3.5194	1.2016
473	gamma-glutamylthreonine	Peptide	Gamma-glutamyl Amino Acid	33364	LC/MS Pos Early	100001314	1750	249.108	5652-48-2	76078708	21403107		HMDB29159	0.1839	0.1144	0.1884	0.1789	0.1885	0.0526	0.0466	0.1045	0.0667	0.0542	7.0211	7.4842	11.4152	9.3677	8.6728	2.3283	1.8115	2.1744	1.8723	2.1383
476	gamma-glutamylvaline	Peptide	Gamma-glutamyl Amino Acid	43829	LC/MS Pos Early	100001126	2700	247.129	2746-34-1	7015683			HMDB11172	0.0877	0.0877	0.0877	0.1156	0.1089	0.0877	0.0877	0.0877	0.0877	0.0877	1.5608	3.3755	4.4698	4.125	3.8004	1	0.0877	0.0877	0.5855	0.873
3960	gluconate	Xenobiotics	Food Component/Plant	587	LC/MS Polar	338	2922	195.051	527-07-1	10690	10240	C00257	HMDB00625	1.4524	1	0.8921	0.8758	1.4478	0.6803	0.3807	0.9199	0.4656	0.2516	3.0753	3.8572	6.5021	3.3846	7.6736	1.2409	0.7302	0.2516	1.9572	0.8755
949	glucose	Carbohydrate	Glycolysis, Gluconeogenesis, and Pyruvate Metabolism	20488	LC/MS Polar	572	2342	179.056	50-99-7	79025	71358	C00031	HMDB00122	0.9606	0.5466	0.8274	0.7202	0.5669	0.9144	0.4622	1.0394	0.5766	0.3282	2.2925	1.0453	2.3511	0.8514	2.8493	4.1785	9.5749	4.8885	7.2989	3.0835
950	glucose 6-phosphate	Carbohydrate	Glycolysis, Gluconeogenesis, and Pyruvate Metabolism	31260	LC/MS Polar	291	4537	259.022	103192-55-8	5958	19952394	C00668	HMDB01401	2.9835	2.7923	3.3966	3.1982	4.6104	2.0025	1.6164	2.064	1.1177	1.0142	0.1904	0.9402	0.8713	0.743	0.5377	0.8809	0.3583	0.9858	0.5505	0.8079
1113	glucuronate	Carbohydrate	Aminosugar Metabolism	15443	LC/MS Polar	100000257	3233.3	193.035	207300-70-7	444791	58552	C00191	HMDB00127	1.0288	0.9434	1.5572	1.316	1.0396	0.9685	0.5203	1.4609	0.6411	0.4628	1.2363	0.9712	1.3385	0.8792	1.515	0.8697	1.2959	0.8526	1.4456	0.7101
41	glutamate	Amino Acid	Glutamate Metabolism	57	LC/MS Pos Early	561	1500	148.06	56-86-0	611	591	C00025	HMDB00148	0.9818	0.9628	0.9795	1.1746	1.1571	0.4481	0.3828	0.495	0.5008	0.3401	1.4913	1.315	1.6759	1.2638	1.5464	1.0974	1.0322	0.976	1.0182	0.7558
50	glutamate, gamma-methyl ester	Amino Acid	Glutamate Metabolism	33487	LC/MS Pos Early	100001103	2170	162.076	1499-55-4;1499-55-4	68662	66546		HMDB61715	1.7681	1.4671	1.4947	1.6705	1.8563	1	0.7069	0.6782	0.2955	0.5256	0.4497	0.8237	1.1098	1.0599	2.366	0.5535	0.2955	0.4202	1.279	0.4802
42	glutamine	Amino Acid	Glutamate Metabolism	53	LC/MS Pos Early	563	1291	147.076	56-85-9	5961	5746	C00064	HMDB00641	0.8693	0.9979	0.4406	0.5051	0.9383	0.2603	1.0017	0.3498	0.9546	1.1844	1.2866	0.9983	1.2244	0.9853	1.6052	1.6969	1.7417	1.3919	1.0118	1.4177
1330	glutarate (C5-DC)	Lipid	Fatty Acid, Dicarboxylate	396	LC/MS Polar	339	2900	131.035	110-94-1	743	3618533	C00489	HMDB00661	0.8785	0.9968	0.9877	1.0032	0.9861	0.4516	0.6226	0.6138	0.5127	0.4516	1.3077	1.4401	1.2968	1.0757	1.5693	1.6284	0.4516	0.4516	1.2327	0.4516
439	glutathione, oxidized (GSSG)	Amino Acid	Glutathione Metabolism	27727	LC/MS Pos Early	448	2667	613.159	103239-24-3	65359	58835	C00127	HMDB03337	1.9803	1.4874	2.2297	2.2761	1.7488	0.3319	0.3497	0.295	0.2783	0.4113	1.5099	1.2881	1.3205	1.2674	1.0451	0.6293	0.5918	0.9549	0.4196	0.5964
438	glutathione, reduced (GSH)	Amino Acid	Glutathione Metabolism	2127	LC/MS Pos Early	496	2000	308.091	70-18-8	124886	111188	C00051	HMDB00125	1.372	1.5315	1.1925	1.3749	1.6864	0.3273	0.3986	0.2522	0.2851	0.2293	2.0806	2.2184	2.3902	2.1647	2.448	0.8075	0.3489	0.4687	0.6118	0.5872
969	glycerate	Carbohydrate	Glycolysis, Gluconeogenesis, and Pyruvate Metabolism	1572	LC/MS Polar	1052	2070.4	105.019	600-19-1	752	732	C00258	HMDB00139	0.3638	0.3677	0.4966	0.327	0.2294	0.7219	0.7276	1.1092	0.888	0.6384	1.4173	1.3122	2.5287	1.2871	3.6307	3.1577	1.1585	0.8908	3.221	1.3757
2315	glycerol	Lipid	Glycerolipid Metabolism	15122	LC/MS Neg	1254	758	91.0401	56-81-5	753	733	C00116	HMDB00131	0.831	0.7604	0.9342	0.7636	0.658	0.7023	0.9948	1.0274	0.4961	0.3437	1.494	1.0052	1.0135	1.0059	1.8697	1.7419	1.687	0.9744	1.3526	1.168
2316	glycerol 3-phosphate	Lipid	Glycerolipid Metabolism	43847	LC/MS Pos Early	100000258	580	173.021	29849-82-9	754	734	C00093	HMDB00126	1.0075	0.5212	1.3599	1.2206	0.6262	0.3459	0.1773	0.3251	0.2233	0.1656	1.3631	1.5971	2.3883	1.7758	1.905	1.1486	0.9035	0.9925	1.432	0.81
1768	glycerophosphoethanolamine	Lipid	Phospholipid Metabolism	37455	LC/MS Polar	100001620	3075	214.049	33049-08-0	123874	110410	C01233	HMDB00114	1.4321	1.1943	1.8152	1.468	1.7595	1.2604	0.9433	1.4152	1.0165	0.8524	0.7768	0.6119	0.7453	0.6543	0.8971	0.9835	1.5043	0.8288	1.0884	0.6324
2321	glycerophosphoglycerol	Lipid	Glycerolipid Metabolism	48857	LC/MS Polar	100001619	2430	245.043		439964	388990	C03274		0.8696	0.8352	1.0377	0.9886	1.082	0.5112	0.5211	0.5091	0.4114	0.41	1.1506	0.8577	1.0147	0.8238	1.2935	1.1513	2.3832	1.5263	1.0706	1.0114
1770	glycerophosphoinositol*	Lipid	Phospholipid Metabolism	47155	LC/MS Polar	100001621	3850	333.059	16824-65-0	167572				1.4384	1.417	1.8429	1.5475	1.8155	1.1548	1.1477	1.0482	0.917	0.9944	0.7876	0.7501	1.0056	0.885	1.2438	0.6724	0.9661	0.6511	0.5657	0.5209
1764	glycerophosphorylcholine (GPC)	Lipid	Phospholipid Metabolism	15990	LC/MS Pos Early	100000269	672	258.11	28319-77-9	71920	571409	C00670	HMDB00086	0.5632	0.4303	0.5133	0.4064	0.4172	0.8957	0.5873	0.9072	0.7492	0.5487	1.5639	1.0928	1.4925	1.1472	1.7367	1.8016	2.2497	1.444	1.9448	1.1237
1769	glycerophosphoserine*	Lipid	Phospholipid Metabolism	57404	LC/MS Pos Early	100015666	577	260.053		3081457	2339060			0.847	0.7532	0.8638	0.7977	0.7757	0.8497	0.5384	0.4987	0.7768	0.7871	1.3291	1.1929	1.6598	1.1362	1.836	1.7194	2.0327	1.7541	1.6861	1.2914
1	glycine	Amino Acid	Glycine, Serine and Threonine Metabolism	58	LC/MS Pos Early	340	1375	76.0393	56-40-6	750	730	C00037	HMDB00123	1.1959	1.0025	1.0686	1.2322	1.124	1.0395	0.9975	1.1019	1.1963	0.8514	0.728	0.726	0.9818	0.7152	1.0413	1.2703	0.8503	0.7696	0.8681	0.7329
2787	glycochenodeoxycholate	Lipid	Primary Bile Acid Metabolism	32346	LC/MS Neg	1628	5236.1	448.307	16564-43-5	12544		C05466	HMDB00637	0.2891	0.2891	0.2891	0.2891	0.2891	1.1718	0.7489	0.997	1.5774	1.003	0.2891	0.2891	0.6411	0.5241	0.9059	0.9934	2.5736	2.0974	2.2102	1.1143
622	glycylleucine	Peptide	Dipeptide	34398	LC/MS Neg	100001258	1891	187.109	869-19-2	92843	83812	C02155	HMDB00759	0.145	0.0781	0.0781	0.0781	0.181	0.0781	0.3128	0.3081	1.1086	0.9718	5.1813	0.8777	1	0.884	3.1267	5.054	11.8868	7.461	5.9513	4.6723
632	glycylvaline	Peptide	Dipeptide	18357	LC/MS Neg	100000487	1320	173.093	1963-21-9	97417	2006926		HMDB28854	0.305	0.305	0.305	0.305	0.305	0.305	0.305	0.305	0.8152	0.6716	2.5284	0.305	0.305	0.346	0.305	0.9088	10.9586	4.9812	1.0912	1.2645
3475	guanine	Nucleotide	Purine Metabolism, Guanine containing	32352	LC/MS Pos Early	172	2032	152.057	73-40-5	764	744	C00242	HMDB00132	1.4929	1.2333	1.5544	1.491	1.2083	1.2514	1.1826	1.228	1.0515	0.9111	0.6878	0.4291	0.6861	0.4188	0.9265	0.4238	1.3135	0.9485	0.4357	0.6628
3474	guanosine	Nucleotide	Purine Metabolism, Guanine containing	1573	LC/MS Neg	1099	1662	282.084	118-00-3	6802	6544	C00387	HMDB00133	1.5454	1.6681	1.7136	1.8025	1.706	0.9515	1.3079	0.8098	0.7768	1.0809	0.8937	0.4921	0.5894	0.511	1.2428	0.4118	1.9397	1.0485	0.5348	0.7869
3492	guanosine 2'-monophosphate (2'-GMP)*	Nucleotide	Purine Metabolism, Guanine containing	52442	LC/MS Neg	100002733	1150	362.051		444571	392466			0.5332	1.855	0.1135	0.1746	1.9197	0.1135	3.98	0.1135	1.4668	4.4099	0.4541	0.3949	0.1497	0.3192	0.1135	0.3192	6.5316	3.9391	0.1135	1.9606
3470	guanosine 3'-monophosphate (3'-GMP)	Nucleotide	Purine Metabolism, Guanine containing	39786	LC/MS Neg	100002704	773.9	362.051	117-68-0	3522	3402			0.0731	0.557	0.0731	0.1426	0.5157	0.0731	4.2961	0.0731	1.3418	5.8627	1.9579	0.4106	0.0731	0.6582	0.26	0.0731	20.2918	6.8718	0.0731	3.1869
3469	guanosine 5'- monophosphate (5'-GMP)	Nucleotide	Purine Metabolism, Guanine containing	2849	LC/MS Pos Early	347	800	364.065	5550-12-09	6804	741	C00144	HMDB01397	0.7549	0.9405	1.0595	1.1839	0.8172	0.685	2.1692	0.4116	1.1332	2.622	1.2452	0.3669	0.3274	0.6018	1.3574	0.2218	8.6263	3.1035	0.2813	1.6366
3629	gulonate*	Cofactors and Vitamins	Ascorbate and Aldarate Metabolism	46957	LC/MS Polar	100001586	2750	195.051	20246-53-1	9794176	7969943	C00257	HMDB03290	5.794	6.8072	8.4502	10.3756	9.8479	2.5867	2.4999	2.28	1.4089	2.0116	0.5235	0.5688	0.5911	0.4833	0.5248	0.0798	0.2383	0.2339	0.135	0.1548
3675	heme	Cofactors and Vitamins	Hemoglobin and Porphyrin Metabolism	41754	LC/MS Pos Late	100001386	1124	616.176	14875-96-8	26945		C00032	HMDB03178	0.9342	0.6156	0.6437	0.4345	0.5783	1.0968	1.5727	1.1674	0.9987	1.3357	0.8035	1.0013	0.6408	0.7983	1.8632	1.0355	1.1219	0.6977	1.4772	1.1054
2566	heptadecasphingosine (d17:1)	Lipid	Sphingosines	57427	LC/MS Pos Late	100015724	1377	286.274	6918-48-5	5283557	4446670			0.4576	0.4669	0.4929	0.4093	0.4989	0.206	0.2936	0.1687	0.2647	0.3068	2.3272	1.6527	1.8117	1.5011	2.7061	2.4215	3.8018	3.1017	2.874	1.9242
1357	hexadecanedioate (C16-DC)	Lipid	Fatty Acid, Dicarboxylate	35678	LC/MS Neg	100001614	4615	285.207	505-54-4	10459	10027	C19615	HMDB00672	0.5432	0.4561	0.553	0.6221	0.4561	1.1018	1	0.4561	0.4561	0.4561	0.4561	0.9012	0.8215	1.2063	1.3869	1.3178	0.4561	0.4561	2.8377	1.9233
2565	hexadecasphingosine (d16:1)*	Lipid	Sphingosines	57428	LC/MS Pos Late	100015723	1289	272.258			28533427			0.5695	0.5614	0.5182	0.4543	0.5956	0.3613	0.4674	0.3763	0.4855	0.5247	1.9369	1.4755	1.7352	1.4044	2.4707	2.6351	4.5726	2.7711	2.9401	2.0327
1464	hexanoylcarnitine (C6)	Lipid	Fatty Acid Metabolism(Acyl Carnitine)	32328	LC/MS Pos Late	100000781	800	260.186	6920-35-0	6426853	4932273		HMDB00705	0.4636	0.6207	0.5978	0.4347	0.5809	0.6758	1.1414	0.4259	0.4979	0.6211	1.1705	0.8842	1.1158	2.1516	2.9756	1.2436	2.4901	1.4106	1.9163	1.5423
3718	hippurate	Xenobiotics	Benzoate Metabolism	15753	LC/MS Neg	100000014	2106.9	178.051	495-69-2	464	451	C01586	HMDB00714	1.2442	0.9898	0.9353	0.8012	1.3002	1.0151	0.8659	1.1073	1.0852	0.8453	0.7714	0.7714	1.1293	0.7714	0.7714	1.0085	0.7714	1.1744	0.8547	0.9915
65	histidine	Amino Acid	Histidine Metabolism	59	LC/MS Neg	355	755.9	154.062	5934-29-2	6274	752	C00135	HMDB00177	0.91	0.8818	0.797	0.7911	0.8279	0.9671	1.0907	1.1153	1.2572	1.0329	0.912	0.6863	0.8839	0.6324	1.2765	1.7242	1.6098	1.1936	1.4017	1.2285
343	homocysteine	Amino Acid	Methionine, Cysteine, SAM and Taurine Metabolism	15128	LC/MS Pos Early	311	2155	136.043	454-29-5	778	757	C00155	HMDB00742	1.244	0.9215	1.2141	1.3033	0.9961	1.0039	0.9337	0.9764	1.3664	0.4724	0.8568	1.8193	2.5587	2.0701	2.8523	2.031	0.3699	0.4772	0.5316	0.7051
360	hypotaurine	Amino Acid	Methionine, Cysteine, SAM and Taurine Metabolism	590	LC/MS Polar	358	2763.4	108.012	300-84-5	107812	96959	C00519	HMDB00965	1.1483	1.1868	1.391	2.0332	1.7026	0.5742	0.4624	0.4965	0.378	0.3846	1.0177	0.9823	1.1742	0.6144	0.378	0.378	0.378	0.378	0.378	0.378
3416	hypoxanthine	Nucleotide	Purine Metabolism, (Hypo)Xanthine/Inosine containing	3127	LC/MS Neg	171	1291.2	135.031	68-94-0	790	768	C00262	HMDB00157	1.8959	1.6811	1.9474	1.992	1.7681	0.9701	0.7349	0.9429	0.6861	0.5774	1.0519	0.9261	1.0503	0.9572	1.0814	1.1436	1.0299	0.9609	0.8385	0.8191
76	imidazole lactate	Amino Acid	Histidine Metabolism	15716	LC/MS Pos Early	100000263	2040	157.061	14403-45-3	440129	389128	C05568	HMDB02320	0.7907	0.5564	0.6906	1.0098	0.9902	1.7899	1.7113	1.3557	1.2726	1.3895	0.4535	0.4535	0.4703	0.4535	0.4535	0.4535	0.4535	0.4535	0.4535	0.4535
74	imidazole propionate	Amino Acid	Histidine Metabolism	40730	LC/MS Pos Early	100003434	2263	141.066	1074-59-5	70630	63798		HMDB02271	1.2365	1.0641	1.2707	1.5906	1.5199	0.7267	0.7645	0.9359	0.5849	0.7365	0.5849	0.5849	0.5849	0.5849	0.5849	0.5849	0.5849	0.5849	0.5849	0.5849
3415	inosine	Nucleotide	Purine Metabolism, (Hypo)Xanthine/Inosine containing	1123	LC/MS Neg	361	1602.1	267.073	58-63-9	6021	21241953	C00294	HMDB00195	1.5911	1.9517	1.5123	1.709	2.0638	0.739	0.878	0.6461	0.6604	0.7774	1.4991	0.9672	0.932	1.0328	1.2797	0.7105	1.8093	1.2488	0.7103	0.9022
1740	inositol 1-phosphate (I1P)	Lipid	Inositol Metabolism	43849	LC/MS Polar	370	4785	259.022	573-35-3;106032-59-1	440194	17215924	C01177	HMDB00213	0.1255	0.6255	1.0971	0.2599	1.0036	1.1924	0.9336	2.307	1.5282	0.7919	0.7019	0.3984	0.9964	0.4312	0.8432	3.2297	3.2273	2.41	3.4531	2.5772
294	isoleucine	Amino Acid	Leucine, Isoleucine and Valine Metabolism	1125	LC/MS Pos Early	376	2800	132.102	73-32-5	6306	769	C00407	HMDB00172	0.9187	0.9558	0.7638	0.7802	0.9492	0.7765	0.9694	0.8705	1.0306	0.9161	1.0513	0.9369	1.2096	1.0573	1.4838	1.8227	1.2205	1.2457	1.3627	1.2493
656	isoleucylglycine	Peptide	Dipeptide	40008	LC/MS Neg	100003169	1992	187.109	868-28-0	342532	303621		HMDB28907	0.2995	0.7668	0.1103	0.1145	0.6017	0.2525	0.9801	0.352	1.0199	1.4193	2.19	0.9797	0.8787	1.1024	1.8782	1.6133	6.4577	2.5297	1.3334	1.5815
271	isovalerylcarnitine (C5)	Amino Acid	Leucine, Isoleucine and Valine Metabolism	34407	LC/MS Pos Early	100001393	3085	246.17	31023-24-2	6426851	4932271		HMDB00688	0.4466	0.4494	0.4166	0.5347	0.5094	0.4372	0.6225	0.4003	0.4285	0.5364	1.7631	1.7102	2.2489	2.0686	2.3527	1.6333	1.3775	1.4183	1.4932	1.4929
220	kynurenine	Amino Acid	Tryptophan Metabolism	15140	LC/MS Pos Early	100000265	2739	209.092	2922-83-0	161166	141580	C00328	HMDB00684	1.1036	1.0141	1.0181	1.2892	1.2012	1.1192	1.0156	0.9961	1.0521	1.0039	0.7711	0.6223	0.5534	0.5932	0.6029	0.7124	0.5534	0.7407	0.6069	0.5534
966	lactate	Carbohydrate	Glycolysis, Gluconeogenesis, and Pyruvate Metabolism	527	LC/MS Polar	482	1468.8	89.0244	79-33-4	612	592	C00186	HMDB00190	1.1416	1.0946	0.7596	0.9445	1.0556	0.9462	0.7788	1.0538	0.8329	0.6234	1.2622	1.1413	1.763	1.3033	1.3964	0.7264	0.7584	1.917	0.5961	0.8442
259	leucine	Amino Acid	Leucine, Isoleucine and Valine Metabolism	60	LC/MS Pos Early	397	2864	132.102	61-90-5	6106	5880	C00123	HMDB00687	0.7411	0.8092	0.5442	0.5414	0.7573	0.7052	0.9256	0.923	1.3452	1.0343	1.4899	0.8859	1.0747	0.9657	1.63	2.5074	2.5189	2.036	2.1285	1.795
670	leucylalanine	Peptide	Dipeptide	40010	LC/MS Pos Early	100003179	2801	203.139	7298-84-2	259321	227625		HMDB28922	0.0142	0.0142	0.0142	0.0142	0.0142	0.0142	0.0142	0.0142	0.06	0.0615	2.7919	0.0142	0.0142	0.038	0.392	1	64.5676	14.2311	2.8826	1.2435
841	leucylglutamine*	Peptide	Dipeptide	48189	LC/MS Pos Early	100003183	2620	260.161		4305457	3511125		HMDB28927	0.2929	0.3708	0.2133	0.1694	0.298	0.3168	0.6048	0.4742	1.5699	1.0433	43.8849	0.8961	1.4101	0.9567	6.5755	12.9065	434.2	144.546	27.4877	16.0788
675	leucylglycine	Peptide	Dipeptide	40045	LC/MS Pos Early	100003185	2778	189.123	686-50-0	79070	71402		HMDB28929	0.1404	0.2571	0.087	0.0667	0.1965	0.2202	0.4875	0.3325	0.899	1.4131	26.6486	1.101	0.7537	2.0142	8.6116	5.3343	129.81	55.8328	12.9157	11.1557
92	lysine	Amino Acid	Lysine Metabolism	1301	LC/MS Pos Early	407	2850	147.113	56-87-1	5962	5747	C00047	HMDB00182	0.7121	0.7528	0.5066	0.4774	0.6428	0.6988	0.9683	0.8059	1.1328	0.9414	1.5204	0.9592	1.1963	1.0317	1.9265	2.4839	2.4902	1.9049	1.9657	1.6641
1154	malate	Energy	TCA Cycle	1303	LC/MS Neg	409	615.6	133.014	6915-15-7	525	510	C00149	HMDB00156	1.5413	1.7801	1.9867	2.2009	2.0878	0.5624	0.3078	0.3367	0.2278	0.1854	1.2665	1.3124	1.6382	1.0785	1.6626	0.9215	0.5896	0.6782	0.4929	0.5176
1342	maleate	Lipid	Fatty Acid, Dicarboxylate	20676	LC/MS Polar	100000707	2640	115.004	110-16-7	444266	392248	C01384	HMDB00176	0.6854	0.6199	0.682	0.8029	1.0075	0.6004	0.5712	0.3486	1.011	0.3242	0.7437	1.027	0.9925	1.1503	2.0072	1.4539	2.5943	1.2335	1.7829	1.1587
1064	mannitol/sorbitol	Carbohydrate	Fructose, Mannose and Galactose Metabolism	46142	LC/MS Polar	100001740	2320	181.072		5780	440	C00794	HMDB00247	0.7258	0.684	0.8644	0.8477	1.0114	1.3369	1.2799	1.2754	1.0933	0.9886	1.3513	1.1152	1.3692	0.9496	1.4525	0.7361	1.1392	0.908	0.7874	0.682
1065	mannose	Carbohydrate	Fructose, Mannose and Galactose Metabolism	48153	LC/MS Polar	803	2200	225.062	3458-28-4	18950	141983	C00159	HMDB00169	1.2161	0.6463	1.1571	0.9747	0.7895	1.2452	0.581	1.3126	0.6131	0.4248	0.7125	0.7174	1.2524	0.2704	1.5105	1.1034	1.3975	1.0253	1.4639	0.881
1066	mannose-6-phosphate	Carbohydrate	Fructose, Mannose and Galactose Metabolism	1469	LC/MS Polar	294	4510	259.022	70442-25-0;104872-94-8	439198	19969422	C00275	HMDB01078	2.9529	2.8095	3.3572	2.9579	4.1923	2.1376	1.7484	2.3017	1.1998	1.0468	0.1478	0.8631	0.9532	0.4882	0.4418	0.935	0.3095	0.8165	0.5741	0.8098
329	methionine	Amino Acid	Methionine, Cysteine, SAM and Taurine Metabolism	1302	LC/MS Pos Early	415	2526	150.058	63-68-3	6137	5907	C00073	HMDB00696	0.7759	0.8203	0.554	0.5369	0.7284	0.7889	0.9804	0.9191	1.3149	1.0196	1.3531	0.7915	1.02	0.8854	1.5099	2.3408	2.7927	1.9462	1.8984	1.6073
333	methionine sulfone	Amino Acid	Methionine, Cysteine, SAM and Taurine Metabolism	44878	LC/MS Pos Early	100004635	1250	182.048	820-10-0	69961	63154			0.7396	0.8104	0.6049	1.0143	0.6985	1.1695	1.0309	1.1375	1.1866	0.9857	0.6049	0.6049	0.6049	0.6049	0.6049	0.6049	0.6049	0.6049	0.6049	0.6049
334	methionine sulfoxide	Amino Acid	Methionine, Cysteine, SAM and Taurine Metabolism	18374	LC/MS Pos Early	100000039	1272	166.053	3226-65-1	158980	139840	C02989	HMDB02005	0.7834	0.6204	0.6407	0.6802	0.708	0.9401	0.9157	1.0129	1.2115	0.9871	1.1962	0.6955	1.073	0.7076	1.4069	2.3317	2.9335	2.529	2.7448	2.1826
1431	methylmalonate (MMA)	Lipid	Fatty Acid Metabolism (also BCAA Metabolism)	1496	LC/MS Polar	418	3078.4	117.019	516-05-2	487	473	C02170	HMDB00202	3.193	4.1663	1.7778	2.3235	4.2612	1.1316	1.8095	1.0192	1.0635	1.418	0.6548	0.6911	0.5487	0.5859	0.7384	0.6743	0.9808	0.6574	0.7396	0.7072
3564	methylphosphate	Nucleotide	Purine and Pyrimidine Metabolism	37070	LC/MS Pos Early	100001805	544	113	7023-27-0	13130	12578		HMDB61711	1.016	0.7349	1.0079	0.7638	0.7555	0.9495	0.6569	0.5985	0.7721	0.5055	1.674	1.2367	2.2155	2.0985	7.1867	1.3901	1.1542	0.8873	2.924	0.9921
310	methylsuccinate	Amino Acid	Leucine, Isoleucine and Valine Metabolism	15745	LC/MS Polar	2051	2800	131.035	498-21-5	10349	9922		HMDB01844	1	0.8375	1.1641	1.1774	1.2213	0.3889	0.4805	0.5154	0.3889	0.3889	1.2991	1.2707	0.9087	0.914	0.3889	1.1529	1.5459	0.9133	0.3889	0.3889
1731	myo-inositol	Lipid	Inositol Metabolism	1124	LC/MS Polar	363	3506.3	225.062	87-89-8	892	10239179	C00137	HMDB00211	2.0393	1.833	2.3045	2.2965	2.3961	1.0492	0.8478	0.8413	0.7429	0.6852	1.1667	0.8761	1.2199	0.9219	1.3124	0.8288	1.1392	0.9066	0.9508	0.7521
117	N,N,N-trimethyl-5-aminovalerate	Amino Acid	Lysine Metabolism	57687	LC/MS Pos Early	100015962	2186	160.133			34236878			0.7653	1.0587	0.9459	0.6982	1.1385	0.5985	1.0158	0.9842	0.5985	0.5985	1.4289	0.831	1.7649	1.1225	0.6495	0.5985	2.0421	0.5985	0.5985	0.5985
1126	N-acetyl-beta-glucosaminylamine	Carbohydrate	Aminosugar Metabolism	35469	LC/MS Pos Early	1216	1897	221.113	4229-38-3	439454	388560	C01239	HMDB01104	1.0055	0.5587	0.5713	1.0784	0.5964	2.0828	0.9835	1.8352	1.0229	0.5587	0.5587	0.5587	0.891	0.5587	0.5587	1	0.5587	0.5587	0.5587	0.5587
1118	N-acetyl-glucosamine 1-phosphate	Carbohydrate	Aminosugar Metabolism	15741	LC/MS Polar	1212	4052	300.049	31281-59-1	440364	389323	C04256	HMDB01367	0.1185	0.1185	0.221	0.2118	0.3355	0.1346	0.1185	0.1393	0.1643	0.1185	2.8804	0.829	1.229	1	1.8933	1.8489	4.0911	3.612	2.8837	2.0789
30	N-acetylalanine	Amino Acid	Alanine and Aspartate Metabolism	1585	LC/MS Polar	1110	1564.8	130.051	97-69-8	88064	79449	C02847	HMDB00766	1.2724	1.2928	0.9151	0.9913	1.3002	1.0087	1.2456	1.0244	1.0919	1.0943	0.8341	0.835	0.833	0.8259	0.9626	1.0884	1.111	0.9889	0.6897	0.8172
39	N-acetylasparagine	Amino Acid	Alanine and Aspartate Metabolism	33942	LC/MS Pos Early	100001257	785	175.071	4033-40-3	99715	90090		HMDB06028	1.7502	1.457	1.8808	2.3422	2.1912	0.9221	1.0779	0.8971	0.7904	0.7627	0.1641	0.1641	0.2267	0.1641	0.1641	0.1641	0.1641	0.1641	0.1641	0.1641
35	N-acetylaspartate (NAA)	Amino Acid	Alanine and Aspartate Metabolism	22185	LC/MS Polar	100000787	3143	174.041	997-55-7;997-55-7	65065	58576	C01042	HMDB00812	2.1842	1.7384	3.0257	3.1103	3.6549	0.713	0.6614	0.8835	0.4729	0.726	0.647	0.6711	0.9617	1.0787	1.1153	1.054	0.8317	1.0025	1.0017	0.9983
349	N-acetylcysteine	Amino Acid	Methionine, Cysteine, SAM and Taurine Metabolism	1586	LC/MS Pos Early	1107	1416	164.038	616-91-1	12035	11540	C06809	HMDB01890	0.705	0.9498	0.5153	0.6136	1	0.3727	0.8515	0.5059	0.7427	1.0878	1.3932	1.0109	1.5973	1.7139	1.1976	1.6216	0.3727	1.2008	0.5241	1.262
1117	N-acetylglucosamine 6-phosphate	Carbohydrate	Aminosugar Metabolism	15107	LC/MS Polar	1213	4114	300.049	102029-88-9	439219	8216065	C00357	HMDB02817	0.7281	0.7452	0.9605	0.7788	0.996	1	0.8873	1.3303	1.0117	0.8399	0.8767	1.8812	3.1715	1.2883	1.988	3.9984	0.7281	0.8887	2.1299	1.5635
1138	N-acetylglucosamine/N-acetylgalactosamine	Carbohydrate	Aminosugar Metabolism	46539	LC/MS Pos Early	100006435	715	222.097		24139			HMDB00215	0.6256	0.6692	0.6825	0.5079	0.4506	0.7053	0.7104	0.6992	0.7714	0.6499	1.6176	1.2286	1.8014	1.4072	2.5642	1.9821	2.7613	2.0697	2.4054	1.6848
1135	N-acetylglucosaminylasparagine	Carbohydrate	Aminosugar Metabolism	48149	LC/MS Pos Early	1215	1212	336.14	2776-93-4	123826	21403014	C04540	HMDB00489	1.378	1.6183	1.1243	1.685	2.2242	0.3383	0.5891	0.3383	0.3444	0.4075	0.3383	1.1828	0.8671	0.8757	0.3383	0.3383	0.3383	0.3383	0.3383	0.3383
44	N-acetylglutamate	Amino Acid	Glutamate Metabolism	15720	LC/MS Polar	100000282	3106	188.056	5817-08-03	70914	1266066	C00624	HMDB01138	1.1249	1.0935	1.5189	1.4339	1.6615	0.1941	0.1703	0.2052	0.1427	0.1802	1.3999	1.249	1.3302	1.3917	1.4546	0.615	0.9065	0.8013	0.3713	0.5968
45	N-acetylglutamine	Amino Acid	Glutamate Metabolism	33943	LC/MS Pos Early	100001253	845	189.087	2490-97-3	182230	158492	C02716	HMDB06029	0.7334	0.6878	0.8674	0.8709	0.9699	0.1238	0.0882	0.0925	0.1077	0.1083	2.159	2.4624	2.7432	2.0629	2.2851	1.2493	1.0301	1.6145	1.077	1.1677
330	N-acetylmethionine	Amino Acid	Methionine, Cysteine, SAM and Taurine Metabolism	1589	LC/MS Neg	1083	1787	190.054	65-82-7	448580	395338	C02712	HMDB11745	0.5949	0.715	0.4289	0.4159	0.622	0.7659	1.1012	0.8988	1.2496	1.2831	1.2061	0.7434	0.8484	0.7686	1.1632	1.7416	2.3976	1.9022	1.1573	1.3568
335	N-acetylmethionine sulfoxide	Amino Acid	Methionine, Cysteine, SAM and Taurine Metabolism	45428	LC/MS Pos Early	100005463	880	208.064	108646-71-5	193368	167798			0.6566	0.5305	0.5708	0.5382	0.4847	1.0942	1.1115	1.3677	1.7994	1.1506	0.9058	0.6525	0.8385	0.6353	0.8061	2.1862	2.4751	2.7532	1.4751	1.6926
1124	N-acetylneuraminate	Carbohydrate	Aminosugar Metabolism	32377	LC/MS Pos Early	1162	660	310.113	131-48-6	439197	10292217	C00270	HMDB00230	0.6881	0.7169	0.6725	0.6234	0.6399	0.6608	0.7611	0.6168	0.7603	0.8102	1.6376	1.2881	1.5881	1.4162	2.0356	1.3901	2.0479	1.4284	1.4245	1.1898
426	N-acetylputrescine	Amino Acid	Polyamine Metabolism	37496	LC/MS Pos Early	192	2230	131.118	18233-70-0	122356	109095	C02714	HMDB02064	1.8957	1.9123	1.7397	2.2111	2.6112	0.0984	0.1921	0.2411	0.1879	0.2603	0.0984	0.0984	0.0984	0.0984	0.0984	0.0984	0.0984	0.0984	0.0984	0.0984
10	N-acetylserine	Amino Acid	Glycine, Serine and Threonine Metabolism	37076	LC/MS Pos Early	100001851	800	148.06	97-14-3	65249	58744		HMDB02931	1.5171	1.1925	1.3951	1.4116	1.3554	1.2027	1.0116	1.347	1.3069	0.6675	0.7569	0.6965	0.9884	0.8073	0.9329	1.2681	0.7512	0.7653	0.9799	0.8072
17	N-acetylthreonine	Amino Acid	Glycine, Serine and Threonine Metabolism	33939	LC/MS Neg	100001274	821.6	160.062	17093-74-2	152204	3841173			1.7795	2.0953	1.7892	1.9366	2.2578	1.3091	1.8374	1.0645	1.2224	1.6918	0.8865	0.9355	0.8873	0.8513	0.9301	0.8477	0.9011	0.7985	0.5101	0.5831
331	N-formylmethionine	Amino Acid	Methionine, Cysteine, SAM and Taurine Metabolism	2829	LC/MS Neg	194	1543.8	176.039	4289-98-9	439750	388809	C03145	HMDB01015	1.4705	1.4086	1.5367	1.6609	1.5062	0.9229	0.7308	0.9608	0.8006	0.6048	1	1.2443	1.3638	1.3565	1.1223	0.8119	0.4431	0.8961	0.4431	0.5975
4101	N-glycolylneuraminate	Xenobiotics	Food Component/Plant	37123	LC/MS Pos Early	100001491	636	326.108	1113-83-3	123802	3794850	C03410	HMDB00833	0.82	0.9498	0.9295	0.9125	1	0.682	0.4817	0.2134	0.4304	0.7504	2.6602	2.4772	2.2011	2.7998	3.1063	1.9963	0.2134	2.3925	1.4517	1.6649
400	N-monomethylarginine	Amino Acid	Urea cycle; Arginine and Proline Metabolism	43586	LC/MS Pos Early	100004488	2845	189.135	53308-83-1	132862	117259	C03884	HMDB29416	0.9296	0.7342	0.6847	0.6303	0.8332	1.0421	1.056	1.278	1.9697	1.0809	0.6604	0.3679	0.7345	0.3147	0.9579	2.8659	1.2212	1.3216	1.9127	1.7231
1709	N-stearoyltaurine	Lipid	Endocannabinoid	39730	LC/MS Neg	100003240	5782	390.268	63155-80-6	168274	147194			0.5718	0.5718	0.5718	0.5718	0.5718	0.5718	0.5718	0.5718	0.5718	0.5718	0.5718	0.5718	0.5718	0.5718	2.1317	1	2.0696	0.7422	1.0789	0.713
3446	N1-methyladenosine	Nucleotide	Purine Metabolism, Adenine containing	15650	LC/MS Pos Early	1242	2120	282.12	15763-06-1	27476	4573813	C02494	HMDB03331	5.0962	2.3036	13.1691	13.9153	2.9292	5.0431	1.6283	4.5509	1.0589	0.5965	0.491	0.3961	0.9859	0.4446	0.8279	0.9528	0.8622	1.0141	0.6959	0.702
3483	N2,N2-dimethylguanosine	Nucleotide	Purine Metabolism, Guanine containing	35137	LC/MS Pos Early	100001412	2210	312.13	2140-67-2	92919	83878		HMDB04824	2.2407	0.8086	5.4468	5.3489	1	1.7944	0.6122	1.1696	0.3271	0.2083	0.0852	0.0852	0.0852	0.0852	0.0852	0.0852	0.0852	0.0852	0.0852	0.0852
99	N6,N6,N6-trimethyllysine	Amino Acid	Lysine Metabolism	1498	LC/MS Pos Early	189	2825	189.16	23284-33-5	440120	140379	C03793	HMDB01325	0.9863	0.9233	0.8587	0.8137	0.8463	1.2138	1.2217	1.38	1.5208	1.2874	0.6761	0.5061	0.8187	0.5674	0.8425	2.2222	1.7008	1.6401	1.0137	1.313
94	N6-acetyllysine	Amino Acid	Lysine Metabolism	36752	LC/MS Neg	100001734	1059	187.109	692-04-6	92832	83801	C02727	HMDB00206	0.4726	0.811	0.1819	0.2289	0.5638	0.1819	0.9992	0.3316	1.2539	1.5165	1.0008	0.1819	0.4432	0.5549	1.2682	3.0251	1.8015	1.8926	1.8959	1.3636
3456	N6-carbamoylthreonyladenosine	Nucleotide	Purine Metabolism, Adenine containing	35157	LC/MS Neg	100001415	2164	411.127	24719-82-2	161466	141829		HMDB41623	1.8579	1.2922	3.3224	2.9091	1.3489	1.2689	0.6845	1.1497	0.5799	0.3845	0.2363	0.5304	0.5889	0.8503	0.2363	0.2363	0.2363	0.2363	0.2363	0.2363
3447	N6-methyladenosine	Nucleotide	Purine Metabolism, Adenine containing	37114	LC/MS Pos Early	213	2264	282.12	1867-73-8	1869	92307		HMDB04044	1.1667	1	1.3225	1.4668	1.1574	1.9027	0.8336	2.2461	0.9518	0.4736	0.3073	0.4802	0.6805	0.3073	0.4748	0.9737	1.141	1.3044	0.383	1.1586
3466	N6-succinyladenosine	Nucleotide	Purine Metabolism, Adenine containing	48130	LC/MS Neg	100001664	940	382.1	4542-23-8	165243			HMDB00912	0.3312	1.43	0.5302	0.6586	2.1278	0.2598	0.2598	0.2598	0.2598	0.2598	1.3414	1.3997	0.2598	1.9946	0.2598	0.2598	0.2598	0.4185	0.2598	0.2598
3585	nicotinamide	Cofactors and Vitamins	Nicotinate and Nicotinamide Metabolism	594	LC/MS Pos Early	432	1942	123.055	98-92-0	936	911	C00153	HMDB01406	1.2934	1.2204	1.3735	1.2753	1.2242	0.8347	0.9267	0.8465	0.8623	0.7232	1.0096	0.9904	1.1518	1.1722	1.3027	1.023	0.6842	0.8933	0.6961	0.762
3589	nicotinamide adenine dinucleotide (NAD+)	Cofactors and Vitamins	Nicotinate and Nicotinamide Metabolism	5278	LC/MS Neg	1310	1434	662.102	53-84-9	5893	5681	C00003	HMDB00902	1.2406	1.0264	1.1819	1.165	1	0.6446	0.7605	0.4416	0.5661	0.7817	5.0081	4.4866	2.5576	5.1507	3.4108	0.5639	0.4416	0.7042	0.7827	0.6719
3588	nicotinamide riboside	Cofactors and Vitamins	Nicotinate and Nicotinamide Metabolism	33013	LC/MS Pos Early	100001310	2040	255.098	1341-23-7	439924		C03150	HMDB00855	1.1521	1.2773	1.3079	1.3653	1.7226	1	0.8236	1.0789	0.7412	0.7997	0.5619	0.5619	0.8345	0.5619	0.5978	0.5619	0.5619	0.5619	0.5619	0.5619
3583	nicotinate ribonucleoside	Cofactors and Vitamins	Nicotinate and Nicotinamide Metabolism	33471	LC/MS Pos Early	100001316	1536	256.082	2625-49-2	161234	141635	C05841	HMDB06809	1.2957	1	1.2038	1.0701	0.9912	0.2526	0.2526	0.2526	0.2526	0.2526	0.2526	0.2526	0.2526	0.2526	0.2526	0.2695	0.2526	0.2526	0.2526	0.2526
178	O-methyltyrosine	Amino Acid	Tyrosine Metabolism	37451	LC/MS Pos Early	100002078	2790	196.097	1080-06-4	76957	69406		HMDB14903	1	1.0623	0.9537	0.8902	1.1065	0.7714	0.8957	0.7568	0.9044	0.7835	1.7576	1.5833	1.4377	2.1994	2.4733	0.6908	0.6908	1.0198	1.0442	0.8636
1696	oleoyl ethanolamide	Lipid	Endocannabinoid	38102	LC/MS Pos Late	1137	1661	326.305	11-58-0;111-58-0	5283454	4446574		HMDB02088	1.0029	0.8337	1.1078	0.9943	0.9758	0.7081	0.7802	0.9427	1.0065	0.7767	0.9935	0.7934	1.1604	0.9971	1.5872	1.9214	1.6797	1.8645	2.0791	1.3293
1529	oleoylcholine	Lipid	Fatty Acid Metabolism (Acyl Choline)	53260	LC/MS Pos Late	100009331	1449	368.352						0.5576	0.4839	1.5395	1.3365	0.5176	0.4839	0.4839	0.4839	0.4839	0.4839	0.4839	1	0.4839	0.8593	0.4839	0.4839	0.4839	1.3706	1.0588	0.4839
452	ophthalmate	Amino Acid	Glutathione Metabolism	34592	LC/MS Pos Early	100001311	2085	290.135	495-27-2	7018721	7993181		HMDB05765	0.87	0.8045	0.9157	0.9862	1.1166	0.0791	0.113	0.0853	0.0854	0.0928	4.7077	5.0731	6.1025	5.2417	4.9852	1.504	0.7445	1.2704	1.0138	1.2568
372	ornithine	Amino Acid	Urea cycle; Arginine and Proline Metabolism	1493	LC/MS Pos Early	444	2800	133.097	3184-13-2	6262	6026	C00077	HMDB03374	1.0103	0.3475	0.7552	0.8047	0.4122	1.3531	0.6726	1.5362	0.9897	0.4721	0.9842	0.9192	1.4522	0.9584	1.4831	3.5236	3.2106	2.2601	2.6051	2.0051
3496	orotate	Nucleotide	Pyrimidine Metabolism, Orotate containing	1505	LC/MS Polar	445	1638.1	155.01	50887-69-9	967	942	C00295	HMDB00226	6.9399	7.9481	1.3679	2.5212	8.5722	0.0396	0.4433	0.0583	0.433	1.025	1.0295	0.8734	0.8945	0.975	1.1566	0.9096	1.1072	1.0418	0.8569	0.8915
3498	orotidine	Nucleotide	Pyrimidine Metabolism, Orotate containing	35172	LC/MS Polar	100001416	2250	287.052	314-50-1	92751	83729		HMDB00788	1.822	1.7953	2.4775	2.5537	2.7202	1.0258	1.1088	0.921	0.7442	0.841	0.9742	1.0969	1.0288	0.7996	1.113	0.4804	0.6416	0.6517	0.576	0.4661
1699	palmitoyl ethanolamide	Lipid	Endocannabinoid	38165	LC/MS Neg	1489	6300	298.275	544-31-0	4671	4509	C16512	HMDB02100	0.9728	0.5765	0.5294	0.7405	0.6166	0.3657	0.5381	0.52	0.6676	0.2638	1.375	1.0606	1.5348	1.0272	2.5631	2.5752	2.9166	1.6549	1.8936	1.5315
1476	palmitoylcarnitine (C16)	Lipid	Fatty Acid Metabolism(Acyl Carnitine)	44681	LC/MS Pos Late	100000776	1425	400.342	6865-14-1	461	448	C02990	HMDB00222	0.7082	0.9459	1.0752	0.9398	1.421	0.2266	0.3412	0.2028	0.3048	0.4743	3.5305	3.7992	3.2545	3.8246	4.6782	0.5972	1.1239	1.5033	1.0541	0.7424
1528	palmitoylcholine	Lipid	Fatty Acid Metabolism (Acyl Choline)	52944	LC/MS Pos Late	100009233	1482	342.337		151731	133731			0.9322	0.6658	1.6187	1.5127	0.8443	0.6658	0.6658	0.6658	0.6658	0.6658	0.6658	1.1305	0.9988	0.8219	0.9715	0.6658	0.6658	1.4859	1.3595	1.0012
3619	pantetheine	Cofactors and Vitamins	Pantothenate and CoA Metabolism	57555	LC/MS Neg	100001495	2765	277.123	496-65-1	439322	388453	C00831		0.6524	0.2182	0.5188	0.4275	0.2414	1.901	0.5486	1.9264	1.8021	0.3365	1.029	0.8151	1.4818	0.6618	2.8544	1.7212	1.3674	0.971	2.1625	1.251
3612	pantothenate	Cofactors and Vitamins	Pantothenate and CoA Metabolism	1508	LC/MS Pos Early	1024	1667	220.118	137-08-6	6613	6361	C00864	HMDB00210	0.6566	0.5566	0.8379	0.982	0.72	0.3297	0.197	0.2933	0.1884	0.105	2.8192	2.812	3.1127	2.8033	2.9438	1.2075	1.018	1.5956	1.1789	1.3474
4454	penicillin G	Xenobiotics	Drug - Antibiotic	37468	LC/MS Pos Early	100002155	2870	335.106	69-57-8	5904	2259	C05551	HMDB15186	1.0494	0.9374	0.9849	0.9268	1.1573	0.6375	0.5628	0.6832	0.7161	0.4646	1.0151	0.8565	1.4489	0.9025	1.3289	1.4605	1.6071	1.6015	1.4477	1.1152
4880	phenol red	Xenobiotics	Chemical	36817	LC/MS Neg	100001724	3665.9	353.049	143-74-8	4766	4602	C12600		0.3923	0.4012	0.3218	0.2734	0.4073	0.4863	0.3961	0.5058	0.5689	0.389	2.052	1.4311	2.1635	1.5551	2.6328	1.9815	2.8351	2.7004	2.5652	1.6713
920	phenylacetylglycine	Peptide	Acetylated Peptides	33945	LC/MS Neg	100001275	2375	192.067	500-98-1	68144	61452	C05598	HMDB00821	1.5839	1.2354	1.3056	1.6393	1.7749	0.6774	0.7105	0.7756	0.7056	0.3539	1.1475	1	1.5533	1.1527	1.2179	0.6335	0.3539	0.6382	0.5443	0.7967
118	phenylalanine	Amino Acid	Phenylalanine Metabolism	64	LC/MS Pos Early	460	2878	166.086	63-91-2	6140	5910	C00079	HMDB00159	0.685	0.7661	0.48	0.4606	0.7231	0.6812	0.9474	0.793	1.1835	1.0037	1.4125	0.8825	1.0595	0.9963	1.592	2.2147	2.4827	1.7795	1.7925	1.5477
724	phenylalanylalanine	Peptide	Dipeptide	41374	LC/MS Pos Early	100003589	2909	237.123	3918-87-4	5488196	4589716			0.0684	0.0684	0.0684	0.0684	0.0684	0.0684	0.0987	0.0684	0.4752	0.2627	6.1249	0.1568	0.3941	0.1597	1.5248	3.5079	30.9142	12.9754	6.3056	4.0203
728	phenylalanylglycine	Peptide	Dipeptide	41370	LC/MS Pos Early	100003588	2898	223.108	721-90-4	98207	88678		HMDB28995	0.149	0.2556	0.0783	0.0552	0.1836	0.2331	0.5558	0.4638	1.5043	1.0854	4.2016	0.8546	1.1147	0.9146	2.7848	4.6793	14.6985	6.6754	4.7232	3.622
1168	phosphate	Energy	Oxidative Phosphorylation	42109	LC/MS Pos Early	461	576	98.9842	7664-38-2	1061	1032	C00009	HMDB01429	0.809	0.6766	0.7447	0.6486	0.711	0.8708	0.9444	0.868	0.921	0.8198	1.4645	1.0556	1.4436	1.15	1.6076	2.0337	2.9553	2.031	1.9559	1.3449
964	phosphoenolpyruvate (PEP)	Carbohydrate	Glycolysis, Gluconeogenesis, and Pyruvate Metabolism	597	LC/MS Neg	463	587.3	166.975	10526-80-4	1005	980	C00074	HMDB00263	0.3992	0.2512	0.6707	0.4589	0.2242	0.6185	0.8774	0.7057	1.2356	0.816	0.961	1.2815	1.4818	1.096	1.0848	2.8007	1.4066	1.039	1.3983	1.6021
1766	phosphoethanolamine	Lipid	Phospholipid Metabolism	1600	LC/MS Pos Early	1026	700	142.026	1071-23-4	1015	990	C00346	HMDB00224	1.1627	1	1.2688	1.4074	1.3273	0.3585	0.2177	0.3308	0.252	0.2177	0.2177	0.2177	0.2177	0.2177	0.2177	0.2177	0.2177	0.2177	0.2177	0.2177
3614	phosphopantetheine	Cofactors and Vitamins	Pantothenate and CoA Metabolism	15504	LC/MS Neg	100000328	1597	357.089	NA	987	103123	C01134	HMDB01416	1.1138	0.5271	1.1423	1.0606	0.6111	1.9522	0.7018	1.8395	2.199	0.4781	0.6875	0.691	1.249	0.5651	1.0678	1.3135	0.7622	0.6331	1.1851	0.9394
2441	phytosphingosine	Lipid	Sphingolipid Synthesis	1510	LC/MS Pos Late	469	1367	318.3	554-62-1	122121	21238683	C12144	HMDB04610	1.004	1.0224	1.1662	0.996	1.1364	0.5085	0.5425	0.6016	0.6812	0.6898	1.0307	0.8088	0.8923	0.6604	1.1418	1.3404	1.9586	1.6033	1.3658	0.9459
379	proline	Amino Acid	Urea cycle; Arginine and Proline Metabolism	1898	LC/MS Pos Early	480	1603	116.071	147-85-3	145742	128566	C00148	HMDB00162	1.0847	1.0197	0.9037	1.005	0.9977	0.7656	0.849	0.8868	0.9577	0.7672	1.1012	0.8357	1.1503	0.924	1.3071	1.2467	1.2596	1.1367	0.9487	1.0023
747	prolylglycine	Peptide	Dipeptide	40703	LC/MS Pos Early	100003674	2136	173.092	2578-57-6	6426709	4932143		HMDB11178	0.2857	0.3347	0.1269	0.1375	0.3323	0.2704	0.4712	0.5748	1.0138	0.5262	2.1298	0.9862	1.2759	1.0527	2.2424	2.8919	2.5214	2.0719	1.9513	2.1012
1428	propionylcarnitine (C3)	Lipid	Fatty Acid Metabolism (also BCAA Metabolism)	32452	LC/MS Pos Early	100001162	2590	218.139	17298-37-2	107738	96904	C03017	HMDB00824	0.663	0.8447	0.5338	0.8274	1.0338	1.1456	2.0504	1.0346	1.5063	1.8219	1.4766	0.7251	0.7661	1.0496	1.0481	0.4383	0.4383	0.4383	0.9662	0.5595
1630	prostaglandin A2	Lipid	Eicosanoid	19761	LC/MS Neg	100000578	4876	333.207	13345-50-1	5280880	4444403	C05953	HMDB02752	2.8033	1.2408	1.9423	1.9683	1.2278	1.3104	0.8103	0.9768	1.0781	0.4877	0.399	0.3089	1.0608	0.3564	0.9305	1.0689	0.8135	0.8343	1.0232	0.572
1628	prostaglandin E2	Lipid	Eicosanoid	7746	LC/MS Neg	487	4573	351.218	363-24-6	5280360	4444059	C00584	HMDB01220	1.9395	1.0174	1.6609	1.949	1.0652	1.3701	0.8403	1.2497	1.1266	0.5418	0.3419	0.258	0.7741	0.232	0.7179	1.063	0.9826	0.7487	1.1409	0.6524
1640	prostaglandin F2alpha	Lipid	Eicosanoid	19398	LC/MS Neg	100000574	4658	353.233	551-11-1	5280363	4444062	C00639	HMDB01139	0.4526	0.4906	0.3002	0.2519	0.3296	0.4057	0.3197	0.1805	0.309	0.1751	1.8553	1.6338	3.456	1.5094	2.9597	5.9855	5.5541	5.2343	6.4255	3.8817
3510	pseudouridine	Nucleotide	Pyrimidine Metabolism, Uracil containing	33442	LC/MS Neg	821	1100	243.062	1445-07-4	15047	21403010	C02067	HMDB00767	1.7992	0.9536	2.6403	2.414	0.9965	2.1273	0.8014	1.7616	0.7529	0.5122	0.627	0.6597	1.0573	0.7013	1.3746	1.0035	1.0948	1.1398	0.9506	0.8866
3664	pterin	Cofactors and Vitamins	Pterin Metabolism	43023	LC/MS Pos Early	100004216	1805	164.057	22363-60-4	73000	65806	C00715	HMDB00802	0.7079	0.3632	0.9332	0.8983	0.5707	1.1667	0.9337	1.1734	1.3772	1.0663	1.54	1.9447	2.385	2.0218	1.7077	0.5492	0.3632	0.5064	0.3632	0.5678
414	putrescine	Amino Acid	Polyamine Metabolism	1408	LC/MS Pos Early	49	3027	89.1073	110-60-1	1045	13837702	C00134	HMDB01414	6.2928	4.3083	5.9151	6.6318	5.748	0.9543	1.2356	0.9273	0.9852	0.7983	0.9425	0.8945	1.0392	0.8079	1.5507	0.9195	1.2245	1.0148	0.7141	0.7391
3715	pyridoxal	Cofactors and Vitamins	Vitamin B6 Metabolism	1651	LC/MS Pos Early	491	2343	168.066	65-22-5	1050	1021	C00250	HMDB01545	0.927	0.9603	1.0397	0.9202	0.8245	0.5969	0.4862	0.4494	0.4598	0.4278	1.7257	1.1394	1.3353	1.3787	1.8644	1.5228	2.3807	1.517	1.1218	0.8828
3712	pyridoxamine	Cofactors and Vitamins	Vitamin B6 Metabolism	2150	LC/MS Pos Early	568	2975	169.097	58052-48-5	1052	1023	C00534	HMDB01431	0.7493	0.7098	0.7279	0.7724	0.7501	0.6145	0.405	0.5246	0.4828	0.4301	2.023	1.7869	2.1419	2.2282	2.4707	1.5731	1.5484	1.6676	1.4936	1.2276
3713	pyridoxamine phosphate	Cofactors and Vitamins	Vitamin B6 Metabolism	3138	LC/MS Pos Early	493	1932	249.063	529-96-4	1053	1024	C00647	HMDB01555	0.9952	0.8696	0.8173	0.7302	0.9877	0.8303	0.7533	0.6793	0.9704	0.8481	1.1058	1.0112	1.199	1.0048	1.3823	1.1563	1.8271	1.5181	1.5816	1.0248
51	pyroglutamine*	Amino Acid	Glutamate Metabolism	46225	LC/MS Pos Early	100001540	1900	129.066	2353-44-8	134508	118562			0.5332	0.5649	0.4344	0.5917	0.6935	0.4163	0.4974	0.4419	0.499	0.4917	2.056	1.4315	2.0185	1.7185	2.2505	1.5822	1.4994	1.5079	1.4647	1.3065
965	pyruvate	Carbohydrate	Glycolysis, Gluconeogenesis, and Pyruvate Metabolism	48990	LC/MS Polar	823	1083	87.0088	127-17-3	1060	96901	C00022	HMDB00243	0.9883	0.5663	1.3512	1.3665	0.8558	1.0117	1.3157	1.2594	0.7496	0.5694	0.6696	0.7652	0.9461	1.096	1.8634	1.7488	0.5663	0.5663	1.1106	0.8189
3696	retinol (Vitamin A)	Cofactors and Vitamins	Vitamin A Metabolism	1806	LC/MS Pos Late	498	1636	269.226	68-26-8	445354	393012	C00473	HMDB00305	0.8283	0.9631	1.0123	0.8628	0.985	1.0013	1.3333	1	0.8025	1.0607	1.8327	1.0768	1.5871	1.0953	1.3558	0.8034	0.5096	0.5096	0.9403	0.9579
984	ribitol	Carbohydrate	Pentose Metabolism	15772	LC/MS Polar	100000406	1789.6	151.061	488-81-3	6912	10254628	C00474	HMDB00508	0.9364	1.0175	1.619	1.5874	1.5573	0.4072	0.1906	0.1906	0.1906	0.1906	0.9165	0.9903	1.8278	1.0097	1.2227	0.1906	0.1906	0.6232	0.1906	0.4081
3609	riboflavin (Vitamin B2)	Cofactors and Vitamins	Riboflavin Metabolism	1827	LC/MS Neg	500	3160	255.089	83-88-5	493570	431981	C00255	HMDB00244	0.7738	0.8442	1.0395	1.0716	1.0939	0.3879	0.3529	0.4003	0.3367	0.2375	1.0301	0.7196	1.0429	0.7784	2.1359	1.3149	1.3337	1.361	2.4556	0.9699
985	ribonate	Carbohydrate	Pentose Metabolism	27731	LC/MS Polar	100001007	2425	165.04	5336-08-03	5460677	4574162	C01685	HMDB00867	1.4813	1.2271	2.5343	3.1773	2.7601	0.7027	0.5139	0.6273	0.4056	0.4056	0.4056	0.7729	0.4056	0.4056	0.4056	0.4056	0.4056	0.4056	0.4056	0.4056
983	ribose	Carbohydrate	Pentose Metabolism	1471	LC/MS Polar	914	1508.2	195.051	50-69-1	5779	4470639	C00121	HMDB00283	0.9885	0.9809	1.1712	1.0115	0.9281	0.9664	0.7552	1.121	0.7293	0.6874	1.5533	0.912	1.5907	1.2112	1.9719	1.0967	1.1605	0.8307	1.1759	0.7084
975	ribose 1-phosphate	Carbohydrate	Pentose Phosphate Pathway	1763	LC/MS Polar	219	4025	229.012	50-99-7;58459-37-3	439236	388373	C00620	HMDB01489	0.9982	1.3547	1.0684	1.2223	1.6172	0.8889	1.2278	0.8964	1.0377	1.1975	1.0018	0.7001	0.8732	0.6357	0.6622	0.5287	2.9003	1.4712	0.6618	0.6712
973	ribulose 5-phosphate	Carbohydrate	Pentose Phosphate Pathway	1474	LC/MS Polar	296	3922	229.012	18265-46-8;108321-99-9	439184	388327	C00199	HMDB00618	1.2101	1.7686	1.4946	1.4194	1.9766	0.5606	0.6046	0.5755	0.5908	1.1117	2.591	0.6654	0.4849	1	0.3265	0.5191	2.2518	1.2965	0.3265	0.5813
59	S-1-pyrroline-5-carboxylate	Amino Acid	Glutamate Metabolism	42370	LC/MS Pos Early	35	1528	114.055	2906-39-0	1196	10140206	C04322	HMDB01301	2.3107	1.3849	1.9766	2.3639	1.4957	1.0281	0.918	1.6982	1.824	0.4958	0.0653	0.0653	0.1977	0.0653	0.186	1.4983	0.9719	0.7041	0.4733	0.25
340	S-adenosylhomocysteine (SAH)	Amino Acid	Methionine, Cysteine, SAM and Taurine Metabolism	42382	LC/MS Neg	197	1832.4	383.114	979-92-0	439155	16788012	C00021	HMDB00939	1.0417	0.9269	0.9799	0.9915	1.0247	1.1583	0.9528	1.0811	1.1612	0.7215	0.8873	1.0085	1.4523	0.9408	1.5009	1.1515	0.9367	0.9099	1.4898	0.9696
339	S-adenosylmethionine (SAM)	Amino Acid	Methionine, Cysteine, SAM and Taurine Metabolism	15915	LC/MS Pos Early	1263	3002	399.145	24346-00-7;86867-01-8;86867-0108	34756		C00019	HMDB01185	1.3385	1.3779	1.3366	1.5523	1.9189	1.1421	1.3179	0.8762	0.982	1.0446	0.9484	0.8337	1.026	0.912	1.018	0.4648	0.7502	0.9011	0.4291	0.4828
443	S-lactoylglutathione	Amino Acid	Glutathione Metabolism	15731	LC/MS Pos Early	1343	2124	380.112	54398-03-7	440018	1053	C03451	HMDB01066	3.7425	2.7997	6.095	5.8392	3.891	1.2994	1	1.0159	0.3879	0.2587	0.1618	0.2443	0.1923	0.5017	0.1618	0.1742	0.1618	0.1618	0.1618	0.1618
442	S-methylglutathione	Amino Acid	Glutathione Metabolism	33944	LC/MS Pos Early	100001259	2200	322.107	2922-56-7	3605667	2841309	C11347		0.9716	1.1417	0.8754	1.2412	1.8896	0.169	0.1826	0.169	0.169	0.169	0.8773	1.2498	1	1.5972	0.169	0.169	0.169	0.169	0.169	0.169
1009	sedoheptulose	Carbohydrate	Pentose Metabolism	53237	LC/MS Polar	100002619	2255	209.067	3019-74-7	5459879	4573620		HMDB03219	1.4412	0.7891	2.0217	1.823	1.0747	0.9155	0.3277	0.8531	0.3445	0.2203	0.9253	1.0829	1.9837	1.1352	2.4578	1.079	0.1999	0.8749	1.6748	0.7663
977	sedoheptulose-7-phosphate	Carbohydrate	Pentose Phosphate Pathway	35649	LC/MS Neg	100001628	599.6	289.033	2646-35-7	616	596	C05382	HMDB01068	1.4434	1.1061	1.2733	1.2286	1.1791	0.7893	0.6522	0.7557	0.5875	0.5142	0.7656	0.9953	1.0047	0.9799	0.8321	1.1334	0.7354	1.2223	1.0298	1.0397
9	serine	Amino Acid	Glycine, Serine and Threonine Metabolism	1648	LC/MS Pos Early	503	1239	106.05	56-45-1	5951	5736	C00065	HMDB00187	0.7873	0.777	0.524	0.5164	0.7226	0.8949	1.0497	1.1584	1.4334	1.0569	0.9006	0.6676	0.9503	0.6789	1.2414	1.9225	1.6302	1.1387	1.61	1.1728
3893	shikimate 3-phosphate	Xenobiotics	Food Component/Plant	38656	LC/MS Pos Early	100002628	583	255.026	63959-45-5	121947	108789	C03175		1.3488	0.9939	1.1403	1.0061	1.0739	0.2971	0.2971	0.3305	0.3459	0.2971	0.2971	0.958	1.0944	1.1599	1.0453	1.1387	0.2971	0.9894	0.816	0.8754
417	spermidine	Amino Acid	Polyamine Metabolism	485	LC/MS Pos Late	50	700	146.165	124-20-9	1102	1071	C00315	HMDB01257	1.5723	1.072	1.5529	1.3388	0.9141	1.2653	0.9635	0.6823	0.7361	0.4981	1.0008	0.9617	1.0708	1.2406	2.7657	0.9992	0.3602	0.1858	1.4767	0.7073
422	spermine	Amino Acid	Polyamine Metabolism	603	LC/MS Pos Late	507	758	203.223	71-44-3	1103	1072	C00750	HMDB01256	0.9269	0.8006	0.6344	0.6986	0.4972	0.8097	0.5724	0.8503	0.959	0.3932	1.5564	1.041	1.4921	1.3333	4.0462	4.8434	2.0557	1.185	5.6571	3.0228
2440	sphingadienine	Lipid	Sphingolipid Synthesis	57426	LC/MS Pos Late	100015643	1350	298.274	25696-03-1	6449795	4952479			0.5131	0.5483	0.4951	0.4235	0.6052	0.4946	0.6328	0.5453	0.7015	0.7134	1.7908	1.3258	1.5782	1.2866	2.1911	2.1888	3.499	2.4303	2.4804	1.7419
2438	sphinganine	Lipid	Sphingolipid Synthesis	17769	LC/MS Pos Late	313	1413	302.305	3102-56-5	3126	3014	C00836	HMDB00269	0.5106	0.4812	0.5659	0.4713	0.5193	0.2012	0.2273	0.2115	0.2513	0.2572	2.0449	1.4341	1.9242	1.5237	2.8185	3.3944	4.8712	3.5522	4.1092	2.7372
2557	sphingosine	Lipid	Sphingosines	17747	LC/MS Pos Late	297	1393	300.29	123-78-4	5353955	4510275	C00319	HMDB00252	0.6345	0.6473	0.6206	0.5185	0.6631	0.4248	0.5047	0.4121	0.5252	0.5356	1.8607	1.3435	1.619	1.3369	2.2727	2.2937	3.4308	2.3543	2.571	1.8047
4178	stachydrine	Xenobiotics	Food Component/Plant	34384	LC/MS Pos Early	100001296	1440	144.102	4136-37-2	115244	103115	C10172	HMDB04827	1.2274	1	0.8302	1.2898	1.1845	0.7085	0.6957	0.5991	0.9214	0.7145	2.8148	1.3508	1.6627	1.0796	1.5578	0.4056	1.015	0.5999	0.4056	0.7212
1478	stearoylcarnitine (C18)	Lipid	Fatty Acid Metabolism(Acyl Carnitine)	34409	LC/MS Pos Late	100001391	1485	428.373	18822-91-8	6426855	21233653		HMDB00848	0.4882	0.441	0.5285	0.491	0.7469	0.3255	0.4124	0.2576	0.3846	0.5382	1.6871	1.2531	1.4015	1.4857	2.368	1.7746	2.2616	1.887	2.2058	1.6041
361	taurine	Amino Acid	Methionine, Cysteine, SAM and Taurine Metabolism	2125	LC/MS Neg	512	690	124.007	107-35-7	1123	1091	C00245	HMDB00251	1.2847	1.3374	1.5197	2.2352	2.0134	0.7023	0.7153	0.6207	0.4722	0.6783	2.1429	2.081	2.0144	1.3149	1.9574	0.5189	0.5455	0.5542	0.3796	0.3479
2788	taurochenodeoxycholate	Lipid	Primary Bile Acid Metabolism	18494	LC/MS Neg	1629	5250	498.289	6009-98-9	387316	343282	C05465	HMDB00951	0.4471	0.3399	0.3399	0.3399	0.3399	1.0667	0.5159	1	1.2328	0.8838	0.9218	0.5545	1.4578	0.4703	1.0955	1.0394	2.6167	2.2604	3.0947	0.9292
1356	tetradecanedioate (C14-DC)	Lipid	Fatty Acid, Dicarboxylate	35669	LC/MS Neg	100001613	4000	257.176	821-38-5	13185	12630		HMDB00872	0.4952	0.4859	0.3169	0.3615	0.5231	1.0523	0.9477	0.3263	0.469	0.5648	1.3422	0.8852	1.0546	1.4382	2.2483	1.4894	3.093	1.638	2.1024	1.8069
3688	thiamin (Vitamin B1)	Cofactors and Vitamins	Thiamine Metabolism	5341	LC/MS Pos Early	873	3050	265.112	59-43-8	1130		C00378	HMDB00235	6.3581	5.9628	6.07	5.356	6.2938	0.5429	0.535	0.5149	0.443	0.3597	0.7564	0.7636	1.1127	0.8125	1.1445	1.0781	1.0037	0.9963	1.0191	0.7694
3690	thiamin diphosphate	Cofactors and Vitamins	Thiamine Metabolism	35670	LC/MS Neg	522	1195.1	423.03	154-87-0	1132	8715	C00068	HMDB01372	2.0108	2.2349	2.1657	3.2296	2.6985	0.4563	1.0636	0.5842	0.9932	1	0.4563	0.7817	0.4563	0.8727	0.4563	0.4563	0.4563	0.8095	0.4563	0.4563
3689	thiamin monophosphate	Cofactors and Vitamins	Thiamine Metabolism	15798	LC/MS Pos Early	523	2378	345.078	532-40-1	3382778	2627905	C01081	HMDB02666	0.4183	0.4835	0.4523	0.4615	0.3648	0.9538	0.7194	1.0149	1.0569	0.803	0.907	0.9851	1.3858	1.3448	1.0921	2.0613	1.8649	1.5908	1.5918	1.3232
4925	thioproline	Xenobiotics	Chemical	53231	LC/MS Pos Early	100009232	1250	134.027	34592-47-4	93176	84120			0.6227	0.6167	0.3549	0.4285	0.6982	0.7256	0.8827	0.7292	0.8884	0.8204	1.7071	1.1116	1.4077	1.5639	2.2638	1.8396	1.7906	1.1976	1.5124	1.2005
16	threonine	Amino Acid	Glycine, Serine and Threonine Metabolism	1284	LC/MS Pos Early	564	1514	120.066	72-19-5	6288	6051	C00188	HMDB00167	0.8689	0.8597	0.6414	0.6711	0.817	0.8486	0.9904	1.0773	1.3008	1.0096	0.9302	0.7819	1.0207	0.84	1.237	1.628	1.3853	1.1117	1.2651	1.0474
785	threonylphenylalanine	Peptide	Dipeptide	31530	LC/MS Neg	100001125	2322	265.119	16875-27-7	4099799	3313819		HMDB29068	0.1809	0.1809	0.1809	0.1809	0.1809	0.1809	0.1809	0.1809	0.1809	0.1809	5.1214	0.1809	0.1809	0.2503	1	0.3444	23.1814	11.0225	0.7362	1.1213
3559	thymidine	Nucleotide	Pyrimidine Metabolism, Thymine containing	2183	LC/MS Neg	872	1963.7	241.083	50-89-5	5789	5585	C00214	HMDB00273	0.7044	1.6277	0.7592	0.8442	1.3284	0.215	0.896	0.218	0.3111	0.9984	1.6197	1.4065	1.222	1.3098	1.8726	0.7055	2.8275	2.0584	0.3956	1.0016
3556	thymidine 3'-monophosphate	Nucleotide	Pyrimidine Metabolism, Thymine containing	37122	LC/MS Neg	100001938	1015	321.049	40705-89-3	5463	5264			0.1549	0.4894	0.1549	0.1549	0.2736	0.1549	0.5063	0.1549	0.1549	1.2555	3.0711	0.7163	0.1549	0.7987	1.2013	0.1549	14.9969	6.4766	0.1549	2.0907
3560	thymine	Nucleotide	Pyrimidine Metabolism, Thymine containing	604	LC/MS Neg	882	1654	125.036	65-71-4	1135	1103	C00178	HMDB00262	3.4142	3.9229	4.8848	5.0734	4.2403	0.6789	0.6327	0.6947	0.2888	0.6887	0.2888	0.7207	1.0372	0.5873	1	1.0878	1.4157	0.6281	0.2888	0.2888
393	trans-4-hydroxyproline	Amino Acid	Urea cycle; Arginine and Proline Metabolism	32306	LC/MS Pos Early	1001	1064	132.066	51-35-4	5810	5605	C01157	HMDB00725	3.4339	3.195	3.5041	3.855	3.6568	2.1541	2.2814	2.146	2.2466	1.6913	0.151	0.1309	0.1831	0.1384	0.1784	0.3087	0.2652	0.3047	0.2822	0.204
209	tryptophan	Amino Acid	Tryptophan Metabolism	54	LC/MS Pos Early	565	2986	205.097	73-22-3	6305	6066	C00078	HMDB00929	0.8409	0.8352	0.6685	0.6728	0.8337	0.7006	0.9598	0.8069	1.0305	0.869	1.1136	0.9695	1.0994	1.1146	1.5039	1.6526	1.4353	1.4103	1.2452	1.2383
795	tryptophylglycine	Peptide	Dipeptide	43028	LC/MS Neg	100003609	2481	260.104	7360-09-0	263471	231453		HMDB29083	0.0722	0.0722	0.0722	0.0722	0.0722	0.0722	0.0722	0.0722	0.1877	0.0722	1.3858	0.0918	0.147	0.0854	0.6142	1.599	6.6883	3.2233	2.0321	1.4815
134	tyrosine	Amino Acid	Tyrosine Metabolism	1299	LC/MS Pos Early	815	2430	182.081	60-18-4	6057	5833	C00082	HMDB00158	0.7991	0.8137	0.5237	0.5461	0.8271	0.7925	0.9933	1.0968	1.2167	1.4062	1.0067	0.668	0.8884	0.7553	1.0637	1.65	1.6089	1.2791	1.3706	1.1114
811	tyrosylglycine	Peptide	Dipeptide	41375	LC/MS Neg	100003598	1635	237.088	673-05-5	259323	227627		HMDB29105	0.1241	0.1909	0.0378	0.0378	0.1514	0.1718	0.5107	0.3841	1.4077	1	7.288	0.7569	1.1143	0.6821	3.5388	9.0541	37.2245	14.2984	11.8389	7.3347
1094	UDP-galactose	Carbohydrate	Nucleotide Sugar	15860	LC/MS Polar	100000298	4000	565.048	2956-16-3;91183-98-1;137868-52-1	18068	17069	C00052	HMDB00302	1.1263	1.2496	1.4337	1.3798	1.6364	1.1225	1.3045	0.8671	1.0141	1.1871	1	0.8425	0.8135	0.7918	0.8504	0.4368	0.7565	0.7233	0.4368	0.459
1090	UDP-glucose	Carbohydrate	Nucleotide Sugar	32344	LC/MS Polar	1096	3950	565.048	117756-22-6	8629	8308	C00029	HMDB00286	1.6585	1.9213	1.8145	1.8158	2.3177	1.5392	1.6275	1	1.1435	1.4346	0.9443	0.591	0.6982	0.825	0.6467	0.0763	0.5477	0.4995	0.0763	0.1752
1095	UDP-glucuronate	Carbohydrate	Nucleotide Sugar	2763	LC/MS Neg	1097	588	579.027	28053-08-9;63700-19-6	17473	16522	C00167	HMDB00935	4.3147	3.8597	4.3887	5.0964	4.3267	2.5235	2.379	1.376	1.8817	2.2769	0.5733	0.5106	0.435	0.4728	0.624	0.2042	0.4197	0.3907	0.1041	0.2418
1101	UDP-N-acetylglucosamine/galactosamine	Carbohydrate	Nucleotide Sugar	46148	LC/MS Polar	100002957	3665	606.074						1.3041	1.3873	1.4942	1.5038	1.6763	1.2526	1.2617	0.877	0.9777	1.0038	0.9962	0.9866	0.7422	0.9248	1.0182	0.3545	1.0603	0.7143	0.1926	0.4908
3509	uracil	Nucleotide	Pyrimidine Metabolism, Uracil containing	605	LC/MS Polar	825	1089.7	111.02	66-22-8	1174	1141	C00106	HMDB00300	2.3742	1.9811	2.5728	2.5702	2.2389	1.7043	1.3852	1.7814	1.1727	0.8717	0.4575	0.6864	1.0369	0.617	0.7773	0.9631	0.3933	0.6035	0.681	0.6142
3425	urate	Nucleotide	Purine Metabolism, (Hypo)Xanthine/Inosine containing	1604	LC/MS Neg	1134	757.1	167.021	69-93-2;120K5305	1175		C00366	HMDB00289	0.4021	0.2579	0.837	0.7648	0.357	0.8801	1.0077	0.7801	0.4852	0.5494	4.4798	8.1354	8.1761	8.0697	7.424	2.6662	0.9923	1.863	1.4328	1.9875
3508	uridine	Nucleotide	Pyrimidine Metabolism, Uracil containing	606	LC/MS Neg	535	1457.6	243.062	58-96-8	6029	5807	C00299	HMDB00296	0.4051	0.5925	0.4512	0.5205	0.6042	0.5034	0.9955	0.5136	0.6359	0.9344	1.4141	1.132	1.2065	1.0815	1.6698	1.03	1.7752	1.2978	1.0045	1.0963
3505	uridine 3'-monophosphate (3'-UMP)	Nucleotide	Pyrimidine Metabolism, Uracil containing	39764	LC/MS Neg	106	750	323.029	35170-0-7;35170-03-7	101543	91753	C01368		0.2337	0.6344	0.0368	0.0352	0.5039	0.0877	2.2304	0.0425	1.4529	3.4623	2.3662	1.1159	0.8013	1.1252	0.8841	1.9678	16.057	8.0806	0.6404	4.4296
3502	uridine 5'-diphosphate (UDP)	Nucleotide	Pyrimidine Metabolism, Uracil containing	5345	LC/MS Neg	870	599.5	402.995	21931-53-3	6031	5809	C00015	HMDB00295	1.4466	1.4938	1.3901	1.4894	1.5811	1.2034	1.8311	1.0151	1.4986	1.8339	0.5291	0.5895	0.2064	0.2847	0.3185	0.1774	0.9849	0.3755	0.2246	0.4435
3503	uridine 5'-monophosphate (UMP)	Nucleotide	Pyrimidine Metabolism, Uracil containing	2856	LC/MS Neg	869	627	323.029	3387-36-8	6030	1399139	C00105	HMDB00288	0.9775	1.1643	1.0225	1.2172	1.2907	0.4805	1.0497	0.3985	0.8176	0.7169	0.3985	0.3985	0.3985	0.3985	0.3985	0.3985	0.3985	0.3985	0.3985	0.3985
3501	uridine 5'-triphosphate (UTP)	Nucleotide	Pyrimidine Metabolism, Uracil containing	33448	LC/MS Neg	871	572	482.961	19817-92-6	6133	5903	C00075	HMDB00285	1.2667	1.1283	1.2711	1.0397	0.8357	0.764	1.3667	0.7089	1	1.0001	0.1796	1.1895	0.1796	0.4706	0.416	0.1796	0.1796	0.1796	0.1796	0.2338
316	valine	Amino Acid	Leucine, Isoleucine and Valine Metabolism	1649	LC/MS Pos Early	566	2479	118.086	72-18-4	6287	6050	C00183	HMDB00883	0.763	0.8356	0.552	0.5324	0.7537	0.7984	0.978	1.0064	1.3712	0.9936	1.0646	0.8363	1.0821	0.91	1.4329	2.4018	1.6845	1.3725	1.8465	1.4743
827	valylglutamine	Peptide	Dipeptide	42079	LC/MS Neg	100003640	1484	244.13	42854-54-6	5253209	4419671		HMDB29125	0.094	0.3246	0.094	0.094	0.226	0.2258	0.5657	0.3291	1.0631	1.2497	27.9502	0.7585	0.4796	0.9369	4.5593	5.6607	152.975	60.5235	12.1521	9.549
828	valylglycine	Peptide	Dipeptide	40475	LC/MS Pos Early	100003641	2444	175.108	686-43-1	136487	120256		HMDB29127	0.0618	0.4258	0.024	0.024	0.3048	0.1066	0.7114	0.136	0.5812	1.6522	3.3	1	0.5702	1.3541	2.6895	2.3302	12.5805	5.6902	3.022	2.8687
831	valylleucine	Peptide	Dipeptide	39994	LC/MS Pos Early	100003210	3138	231.17	22906-55-4	352039	312586		HMDB29131	0.2204	0.3047	0.1533	0.1533	0.2805	0.1812	0.5765	0.3204	1	1.0164	78.7068	0.9301	0.8149	1.2333	5.7865	5.8034	429.335	165.175	11.6735	8.5896
3417	xanthine	Nucleotide	Purine Metabolism, (Hypo)Xanthine/Inosine containing	3147	LC/MS Polar	1004	2023	151.026	69-89-6	1188	1151	C00385	HMDB00292	0.648	0.5563	0.729	0.659	0.6349	0.6438	0.6811	0.627	0.5078	0.478	1.9564	2.044	2.3388	2.1188	2.7959	1.8996	1.5761	1.6504	1.271	1.4858
3419	xanthosine	Nucleotide	Purine Metabolism, (Hypo)Xanthine/Inosine containing	15136	LC/MS Neg	100000299	1075	283.068	146-80-5	64959	58484	C01762	HMDB00299	0.7595	0.6369	1.6473	1.8496	1.7495	0.2012	0.2591	0.1534	0.167	0.2676	0.798	1.2291	1.1342	1.4286	0.8208	1.982	1.1312	1.7044	1.1888	0.8688
987	xylulose 5-phosphate	Carbohydrate	Pentose Metabolism	37285	LC/MS Polar	100001968	3955	229.012	105931-44-0	439190	388330	C00231	HMDB00868	1.9884	2.8967	2.856	2.5179	2.9648	0.7654	0.5806	0.8481	1	0.4918	4.5006	0.8498	0.5871	1.3098	0.4573	0.8754	4.7089	2.7677	0.4573	0.8009

## Sheet: OrigScale (cells CLP)
								SAMPLE_NAME	UNDA-00048-01	UNDA-00049-01	UNDA-00050-01	UNDA-00051-01	UNDA-00052-01	UNDA-00053-01	UNDA-00054-01	UNDA-00055-01	UNDA-00056-01	UNDA-00057-01	UNDA-00058-01	UNDA-00059-01	UNDA-00060-01	UNDA-00061-01	UNDA-00062-01	UNDA-00063-01	UNDA-00064-01	UNDA-00065-01	UNDA-00066-01	UNDA-00067-01
								SAMPLE_ID	4917564	4917565	4917566	4917567	4917568	4917569	4917570	4917571	4917572	4917573	4917574	4917575	4917576	4917577	4917578	4917579	4917580	4917581	4917582	4917583
								CLIENT_IDENTIFIER	4T1_Ctrl_1	4T1_Ctrl_2	4T1_Ctrl_3	4T1_Ctrl_4	4T1_Ctrl_5	4T1_KD_1	4T1_KD_2	4T1_KD_3	4T1_KD_4	4T1_KD_5	EpH4_Ctrl_1	EpH4_Ctrl_2	EpH4_Ctrl_3	EpH4_Ctrl_4	EpH4_Ctrl_5	EpH4_KD_1	EpH4_KD_2	EpH4_KD_3	EpH4_KD_4	EpH4_KD_5
								BRADFORD_CLP	10.904	11.819	12.107	12.745	12.635	10.923	9.991	11.662	10.009	10.504	4.297	6.909	5.253	6.312	3.679	4.279	2.597	4.893	3.716	5.421
								CELL_COUNT_X10E6	16.6	13.2	15.2	14.6	16.5	12.6	10.8	12.6	10.7	11	10.1	10.6	13.1	11.6	11.3	12.9	14.8	14.3	14.1	14.9
								CELL_LINE	4T1	4T1	4T1	4T1	4T1	4T1	4T1	4T1	4T1	4T1	EpH4	EpH4	EpH4	EpH4	EpH4	EpH4	EpH4	EpH4	EpH4	EpH4
								GROUP_DESCRIPTION	4T1 Scrambled Ctrl	4T1 Scrambled Ctrl	4T1 Scrambled Ctrl	4T1 Scrambled Ctrl	4T1 Scrambled Ctrl	4T1 Aqp7 knockdown	4T1 Aqp7 knockdown	4T1 Aqp7 knockdown	4T1 Aqp7 knockdown	4T1 Aqp7 knockdown	EpH4 Scrambled Ctrl	EpH4 Scrambled Ctrl	EpH4 Scrambled Ctrl	EpH4 Scrambled Ctrl	EpH4 Scrambled Ctrl	EpH4 Aqp7 knockdown	EpH4 Aqp7 knockdown	EpH4 Aqp7 knockdown	EpH4 Aqp7 knockdown	EpH4 Aqp7 knockdown
								GROUP_NUMBER	1	1	1	1	1	2	2	2	2	2	3	3	3	3	3	4	4	4	4	4
								TREATMENT	Ctrl	Ctrl	Ctrl	Ctrl	Ctrl	Aqp7_KD	Aqp7_KD	Aqp7_KD	Aqp7_KD	Aqp7_KD	Ctrl	Ctrl	Ctrl	Ctrl	Ctrl	Aqp7_KD	Aqp7_KD	Aqp7_KD	Aqp7_KD	Aqp7_KD
PATHWAY_SORTORDER	BIOCHEMICAL	SUPER_PATHWAY	SUB_PATHWAY	COMP_ID	PLATFORM	CHEMICAL_ID	KEGG	Group HMDB_ID	4T1_Ctrl	4T1_Ctrl	4T1_Ctrl	4T1_Ctrl	4T1_Ctrl	4T1_Aqp7_KD	4T1_Aqp7_KD	4T1_Aqp7_KD	4T1_Aqp7_KD	4T1_Aqp7_KD	EpH4_Ctrl	EpH4_Ctrl	EpH4_Ctrl	EpH4_Ctrl	EpH4_Ctrl	EpH4_Aqp7_KD	EpH4_Aqp7_KD	EpH4_Aqp7_KD	EpH4_Aqp7_KD	EpH4_Aqp7_KD
7441	CE(12:0)	Cholesterol Ester	CE Ester	54493	DMS-MS	100010641		HMDB02262												0.05
7442	CE(14:0)	Cholesterol Ester	CE Ester	53452	DMS-MS	100009600		HMDB06725	1.3954	1.3856	1.4256	1.4114	1.4164	1.1842	1.017	1.4816	1.3364	1.2077	1.5161	2.0817	2.0166	1.6879	1.8175	1.9306	1.8761	1.7956	1.7042	1.692
7443	CE(14:1)	Cholesterol Ester	CE Ester	53453	DMS-MS	100009601		HMDB10367	0.0643	0.0758	0.0833	0.0902	0.0829	0.0835	0.0717	0.1086	0.0968	0.092	0.0822	0.1335	0.1032	0.1258	0.1241	0.1206	0.1268	0.1127	0.0972	0.1307
7444	CE(15:0)	Cholesterol Ester	CE Ester	53454	DMS-MS	100009602		HMDB60057	0.637	0.5267	0.6055	0.5811	0.5624	0.5562	0.4446	0.6092	0.6858	0.515	0.9909	1.2273	1.1667	1.1016	1.0244	1.3048	1.2152	1.1555	1.0457	1.1375
7445	CE(16:0)	Cholesterol Ester	CE Ester	54315	DMS-MS	100010463	C11251	HMDB00885	5.1752	4.9713	5.9365	5.5441	5.1946	3.3358	3.0764	4.1728	3.8317	3.3841	15.5996	22.1727	20.4415	17.2969	17.6084	18.9387	16.9026	17.4902	17.1149	17.2328
7446	CE(16:1)	Cholesterol Ester	CE Ester	54316	DMS-MS	100010464		HMDB00658	2.0952	2.129	2.5258	2.3872	2.0658	1.4146	1.1975	1.735	1.7074	1.4295	8.9342	12.2989	10.7021	9.0633	8.8242	10.4418	9.2587	10.3422	8.7184	8.9987
7447	CE(17:0)	Cholesterol Ester	CE Ester	54122	DMS-MS	100010270		HMDB60059	0.6308	0.6471	0.6468	0.7086	0.6437	0.4442	0.3674	0.5118	0.4572	0.4419	1.8419	2.7694	2.3046	2.0979	2.051	2.434	2.1424	2.1962	2.1167	1.9531
7448	CE(18:0)	Cholesterol Ester	CE Ester	54123	DMS-MS	100010271		HMDB10368	2.0684	2.1661	2.2219	2.144	1.7881	1.6466	1.4639	1.9875	1.8024	1.6734	5.107	7.1378	6.6159	5.6842	5.5935	6.2526	5.3047	6.1373	5.9766	5.9679
7449	CE(18:1)	Cholesterol Ester	CE Ester	54494	DMS-MS	100010642		HMDB00918	8.4898	8.753	9.4821	9.4713	8.8646	8.6778	7.0428	9.9655	9.3082	8.7478	30.1861	42.1785	36.9878	32.2754	32.8089	35.7092	31.2346	34.9504	31.0982	32.4233
7450	CE(18:2)	Cholesterol Ester	CE Ester	53968	DMS-MS	100010116	C15441	HMDB00610	1.6202	1.6308	1.7704	1.6964	1.7367	1.0063	0.833	1.1538	1.1577	1.0337	7.2502	9.8289	8.4986	7.6699	7.8922	8.2586	7.5333	7.5809	7.1551	7.6609
7451	CE(18:3)	Cholesterol Ester	CE Ester	53969	DMS-MS	100010117		HMDB10370	0.1513	0.1619	0.1843	0.1828	0.2128	0.094	0.0894	0.1085	0.1015	0.0827	0.8141	1.0869	1.0127	0.7765	0.8002	0.8839	0.8241	0.8803	0.7638	0.8689
7452	CE(18:4)	Cholesterol Ester	CE Ester	53623	DMS-MS	100009771														0.0306	0.028	0.0265		0.0315		0.0236	0.0271	0.0209
7453	CE(20:0)	Cholesterol Ester	CE Ester	54317	DMS-MS	100010465		HMDB06740	0.1832	0.1876	0.2228	0.186	0.1851	0.2811	0.1762	0.2559	0.2374	0.1926	0.5809	0.6525	0.6604	0.5276	0.5966	0.5691	0.5721	0.6235	0.5941	0.5519
7454	CE(20:1)	Cholesterol Ester	CE Ester	54318	DMS-MS	100010466		HMDB05193	0.3887	0.3361	0.3605	0.371	0.3132	0.8251	0.6002	0.865	0.7514	0.7879	0.7509	1.1279	0.9704	0.8336	0.8228	1.0461	0.829	0.9552	0.9368	0.9903
7455	CE(20:2)	Cholesterol Ester	CE Ester	53624	DMS-MS	100009772			0.1006	0.1331	0.1002	0.1112	0.1114	0.2169	0.1464	0.2603	0.2165	0.2493	0.2751	0.334	0.345	0.2828	0.2421	0.3557	0.2791	0.3179	0.2938	0.3172
7456	CE(20:3)	Cholesterol Ester	CE Ester	54319	DMS-MS	100010467		HMDB06736	0.205	0.2339	0.262	0.2248	0.2542	0.1617	0.1225	0.2071	0.1888	0.1824	0.9142	1.3076	1.1804	0.9696	0.9732	1.0473	0.9607	1.0727	0.9313	1.0106
7457	CE(20:4)	Cholesterol Ester	CE Ester	54495	DMS-MS	100010643		HMDB06726	0.8658	0.8706	0.9601	0.9191	0.882	0.5046	0.4341	0.6422	0.6412	0.512	4.098	5.9584	5.2624	4.7311	3.8345	4.9254	4.4337	4.8216	4.4011	4.6431
7458	CE(20:5)	Cholesterol Ester	CE Ester	53795	DMS-MS	100009943		HMDB06731	0.1038	0.1308	0.1516	0.1371	0.1085	0.0659	0.0612	0.0926	0.106	0.0834	0.5176	0.8529	0.7196	0.5903	0.5476	0.6579	0.5589	0.6153	0.6023	0.5974
7459	CE(22:0)	Cholesterol Ester	CE Ester	53625	DMS-MS	100009773		HMDB06727	0.0707	0.0713	0.0801	0.0588		0.0745	0.0676	0.1066	0.0907		0.116	0.1363	0.1481	0.1319		0.132	0.1026	0.1479	0.0921	0.1318
7460	CE(22:1)	Cholesterol Ester	CE Ester	53796	DMS-MS	100009944		HMDB10372	0.0911	0.0857	0.1088	0.1107	0.0733	0.1888	0.1513	0.2409	0.1965	0.1921	0.1584	0.1741	0.1682	0.1365	0.1337	0.1905	0.1349	0.1951	0.1413	0.1598
7461	CE(22:2)	Cholesterol Ester	CE Ester	53269	DMS-MS	100009417		HMDB06737	0.0432	0.046	0.0465	0.0499		0.0428	0.0429	0.0796	0.0547	0.067	0.1326	0.1447	0.1433	0.1087	0.1221	0.1899	0.1223	0.1742	0.1347	0.1239
7462	CE(22:4)	Cholesterol Ester	CE Ester	54124	DMS-MS	100010272		HMDB06729	0.0487	0.0508	0.0445	0.0528	0.0449	0.0306	0.03	0.0208		0.0236	0.0556	0.0981	0.0841	0.0795	0.0942	0.0682	0.0741	0.0702	0.0663	0.0701
7463	CE(22:5)	Cholesterol Ester	CE Ester	53797	DMS-MS	100009945		HMDB10375	0.0915	0.0966	0.1181	0.1124	0.101	0.0685	0.0522	0.0909	0.0735	0.0837	0.2437	0.3656	0.3208	0.2761	0.2287	0.2908	0.3234	0.2718	0.2617	0.2993
7464	CE(22:6)	Cholesterol Ester	CE Ester	53970	DMS-MS	100010118		HMDB06733	0.2867	0.2516	0.2807	0.2985	0.2876	0.1713	0.1327	0.186	0.1783	0.1518	1.0976	1.5636	1.354	1.201	1.1506	1.3111	1.2124	1.2474	1.1839	1.2459
7465	CE(24:0)	Cholesterol Ester	CE Ester	54125	DMS-MS	100010273		HMDB10376	0.1235	0.1098	0.1124	0.1342	0.0857	0.1883	0.152	0.1832	0.2005	0.1581	0.1437	0.2268	0.2172	0.2259	0.1496	0.2074	0.1996	0.1545	0.1703	0.168
7466	CE(24:1)	Cholesterol Ester	CE Ester	54126	DMS-MS	100010274		HMDB06728	0.1497	0.1249	0.1555	0.145	0.1106	0.3298	0.2401	0.3315	0.28	0.296	0.1058	0.1414	0.1184	0.1313	0.0971	0.0908	0.1083	0.1451	0.1144	0.1211
7467	CER(14:0)	Sphingolipids	Ceramide	54496	DMS-MS	100010644	C13916	HMDB11773	0.0872	0.0751	0.0933	0.0909	0.0782	0.089	0.0754	0.0784	0.0777	0.0668	0.0357	0.0407	0.036	0.0292	0.0442	0.044	0.0457	0.0435	0.0454	0.0453
7468	CER(16:0)	Sphingolipids	Ceramide	53971	DMS-MS	100010119		HMDB04949	3.7176	3.1219	4.1863	4.3278	3.9733	3.8144	3.1583	4.285	3.9693	3.5311	1.4337	1.8678	1.8249	1.6276	1.3622	2.4365	2.355	2.5565	2.4357	2.5511
7469	CER(18:0)	Sphingolipids	Ceramide	54320	DMS-MS	100010468		HMDB04950	0.2131	0.1849	0.2105	0.2162	0.1836	0.1349	0.107	0.1562	0.1803	0.1354	0.0753	0.0985	0.0927	0.0742	0.08	0.1132	0.1102	0.1119	0.1139	0.1122
7471	CER(18:1)	Sphingolipids	Ceramide	53626	DMS-MS	100009774		HMDB04948	0.0187	0.0159	0.0228	0.0212	0.0201	0.0217		0.0328		0.0236						0.0209	0.0278	0.026	0.0195	0.0251
7472	CER(20:0)	Sphingolipids	Ceramide	54321	DMS-MS	100010469		HMDB04951	0.0588	0.0511	0.0624	0.0721	0.0583	0.0253	0.0316	0.0312	0.0414	0.0204	0.0708	0.0801	0.0822	0.0772	0.0683	0.1261	0.1391	0.1176	0.1478	0.1267
7474	CER(22:0)	Sphingolipids	Ceramide	53627	DMS-MS	100009775		HMDB04952	0.992	0.8577	1.0571	1.0798	0.931	0.626	0.5586	0.7128	0.6772	0.6012	1.0612	1.285	1.2222	1.161	0.9913	1.7605	1.6637	1.6446	1.6318	1.6502
7475	CER(22:1)	Sphingolipids	Ceramide	54127	DMS-MS	100010275		HMDB11775	0.068	0.0648	0.0906	0.0909	0.069	0.0511	0.0495	0.0611	0.0674	0.0694	0.0465	0.0526	0.0584	0.0504	0.0501	0.0828	0.0775	0.0908	0.0773	0.0836
7476	CER(24:0)	Sphingolipids	Ceramide	54322	DMS-MS	100010470		HMDB04956	2.4064	2.2484	2.4086	2.5374	2.0434	2.5579	2.249	2.7654	2.831	2.2571	2.1951	2.6515	2.6275	2.4446	1.9372	2.4608	2.2758	2.2989	2.1608	2.3361
7477	CER(24:1)	Sphingolipids	Ceramide	53628	DMS-MS	100009776		HMDB04953	2.107	1.8595	2.281	2.4283	1.8485	2.6786	2.4244	3.1289	3.1092	2.5722	1.1377	1.3695	1.3795	1.2034	1.0704	1.7347	1.5116	1.7824	1.5961	1.7539
7478	CER(26:0)	Sphingolipids	Ceramide	54497	DMS-MS	100010645		HMDB04955	0.0286	0.0243	0.0245	0.0168	0.0194	0.0286	0.0271	0.031	0.0389	0.0272	0.0679	0.0836	0.093	0.0828	0.0633	0.0592	0.0542	0.0542	0.0515	0.0566
7479	CER(26:1)	Sphingolipids	Ceramide	53798	DMS-MS	100009946		HMDB04955	0.0395	0.0326	0.0271	0.0359	0.03	0.0266	0.0238	0.0356	0.0357	0.0289		0.0212	0.0243	0.0248	0.0219	0.0233	0.0286	0.0236	0.0222	0.0268
7534	DAG(12:0/16:0)	Diacylglycerol	DAG Ester	53629	DMS-MS	100009777			0.0714		0.0595	0.0682	0.0422		0.0509				0.0732	0.0886	0.0573			0.0947	0.0837		0.0782	0.0798
7537	DAG(12:0/18:1)	Diacylglycerol	DAG Ester	53799	DMS-MS	100009947			0.0705	0.0435	0.069	0.0548	0.046	0.0398	0.0586	0.0667	0.0914	0.1136	0.082	0.0517	0.0642	0.0405	0.1545	0.0835	0.0671	0.0606	0.064	0.0841
7538	DAG(12:0/18:2)	Diacylglycerol	DAG Ester	53455	DMS-MS	100009603			0.0527		0.0531			0.0439	0.0613		0.0802			0.0369	0.0445	0.043			0.0382
7541	DAG(14:0/14:0)	Diacylglycerol	DAG Ester	53270	DMS-MS	100009418	C16667	HMDB07008	0.4504	0.5183	0.2947	0.2948	0.2096	0.3363	0.456	0.1971	0.1663	0.1435	0.3018	0.4237	0.3267	0.2926	0.2305	0.1405	0.1204	0.1461	0.1261	0.1554
7543	DAG(14:0/16:0)	Diacylglycerol	DAG Ester	54323	DMS-MS	100010471		HMDB07095	2.1491	2.079	2.4666	2.1866	1.7189	1.1124	1.0433	1.2626	1.5921	1.4456	1.6934	2.4541	1.9954	2.0175	1.7269	1.9987	1.9305	1.8867	1.766	1.8903
7544	DAG(14:0/16:1)	Diacylglycerol	DAG Ester	54498	DMS-MS	100010646		HMDB07012	0.7084	0.5941	0.6612	0.5644	0.4648	0.3933	0.3931	0.385	0.3703	0.374	0.4547	0.7175	0.5892	0.5825	0.428	0.4575	0.4387	0.4708	0.4543	0.5183
7547	DAG(14:0/18:1)	Diacylglycerol	DAG Ester	53800	DMS-MS	100009948		HMDB07015	1.4565	1.317	1.5923	1.2338	1.151	1.1872	1.1827	1.2702	1.091	1.0363	1.1632	1.6093	1.3322	1.4195	1.0017	1.2951	1.2132	1.3092	1.2341	1.3455
7548	DAG(14:0/18:2)	Diacylglycerol	DAG Ester	54128	DMS-MS	100010276		HMDB07016	0.1089	0.0934	0.1042	0.0799	0.0552	0.0819	0.0925	0.0809	0.1116	0.1031	0.102	0.1138	0.1107	0.1146	0.1284	0.1251	0.0905	0.0791	0.0843	0.1097
7551	DAG(14:0/20:0)	Diacylglycerol	DAG Ester	53974	DMS-MS	100010122		HMDB07356	0.0579	0.0714	0.0868	0.0694		0.1318		0.0758	0.2838	0.2683	0.3449	0.1489	0.1565	0.247	0.3823	0.3117	0.34	0.1479	0.1019	0.1157
7552	DAG(14:0/20:4)	Diacylglycerol	DAG Ester	53975	DMS-MS	100010123		HMDB07025	0.0302											0.0175
7553	DAG(14:0/22:6)	Diacylglycerol	DAG Ester	54499	DMS-MS	100010647		HMDB07034	0.0261	0.017	0.0183	0.0212		0.018					0.0239	0.0326	0.0221			0.0471
7554	DAG(14:1/16:0)	Diacylglycerol	DAG Ester	53456	DMS-MS	100009604		HMDB07096	0.1032	0.0996	1.8522	0.0922	0.0688	0.8669	0.0645	0.1104	5.0703	4.3818	2.9196	0.0605	0.0495	2.3373	4.6472	3.7437	3.2679	0.6944	0.0444	0.0597
7555	DAG(14:1/18:1)	Diacylglycerol	DAG Ester	54325	DMS-MS	100010473		HMDB07044	0.137	0.1247	0.1825	0.1042	0.0722	0.1361	0.1256	0.0849	0.1734	0.1631	0.1593	0.0694	0.0667	0.0926	0.1534	0.1645	0.1162	0.064	0.0595	0.069
7561	DAG(15:0/18:1)	Diacylglycerol	DAG Ester	53457	DMS-MS	100009605		HMDB07073	0.1432	0.1398	0.2044	0.1433	0.1224	0.1727	0.1695	0.2033	0.2217	0.2104	0.1278	0.1275	0.1407	0.141	0.149	0.1808	0.1122	0.1406	0.1119	0.1541
7567	DAG(16:0/16:0)	Diacylglycerol	DAG Ester	53977	DMS-MS	100010125		HMDB07098	4.8015	4.7751	5.1976	5.0951	4.0426	1.9164	2.1018	2.7885	2.4621	2.2136	2.9943	4.4854	4.0391	4.0282	2.9605	4.2776	3.99	4.2122	4.0736	4.894
7568	DAG(16:0/16:1)	Diacylglycerol	DAG Ester	53978	DMS-MS	100010126		HMDB07099	2.9535	2.8332	3.3327	2.8576	2.684	1.7969	2.077	2.4167	2.2834	2.0039	1.9605	2.8878	2.6637	2.5846	2.0912	2.9768	2.763	2.9047	3.0994	3.5528
7570	DAG(16:0/18:0)	Diacylglycerol	DAG Ester	54500	DMS-MS	100010648		HMDB07100	3.8388	3.7884	3.7786	3.5748	3.3471	1.5876	1.5697	2.0207	1.7584	1.6951	2.1941	2.887	3.0301	2.7577	2.0759	3.1954	2.8715	3.0048	2.9598	3.3434
7571	DAG(16:0/18:1)	Diacylglycerol	DAG Ester	53630	DMS-MS	100009778	C13861	HMDB07102	9.5806	9.0091	10.5675	9.921	9.0193	7.0801	7.8001	9.593	8.7407	8.2055	6.1378	9.0497	7.9884	8.0534	5.779	9.4959	8.2549	9.3492	9.5447	10.4768
7572	DAG(16:0/18:2)	Diacylglycerol	DAG Ester	53271	DMS-MS	100009419		HMDB07103	0.467	0.424	0.5178	0.5443	0.4505	0.3712	0.3095	0.4069	0.4324	0.3545	0.3941	0.5764	0.4872	0.5103	0.4121	0.6009	0.3764	0.5261	0.5424	0.5973
7573	DAG(16:0/18:3)	Diacylglycerol	DAG Ester	53979	DMS-MS	100010127		HMDB07105		0.0312	0.052	0.0392		0.0472						0.0633	0.0419						0.0342	0.0578
7576	DAG(16:0/20:3)	Diacylglycerol	DAG Ester	54501	DMS-MS	100010649		HMDB07111	0.1746	0.149	0.1776	0.1495	0.1082	0.1934	0.1652	0.2633	0.2278	0.2526	0.2456	0.3486	0.2692	0.3007	0.2772	0.4345	0.2691	0.3596	0.3229	0.3771
7577	DAG(16:0/20:4)	Diacylglycerol	DAG Ester	53458	DMS-MS	100009606		HMDB07112	0.1829	0.1382	0.1635	0.1938	0.1312	0.1146	0.0804	0.1257	0.1336	0.1254	0.1522	0.2268	0.2203	0.2046	0.114	0.1675	0.1355	0.1948	0.1549	0.1672
7578	DAG(16:0/20:5)	Diacylglycerol	DAG Ester	54502	DMS-MS	100010650		HMDB07114			0.0284									0.0484		0.0373				0.0391	0.0263	0.0387
7579	DAG(16:0/22:5)	Diacylglycerol	DAG Ester	54326	DMS-MS	100010474		HMDB07120	0.0995	0.0787	0.1123	0.0966	0.0707	0.0958	0.069	0.1026	0.0885	0.0911	0.0949	0.1943	0.148	0.1163	0.1114	0.1227	0.0692	0.1052	0.0734	0.1052
7580	DAG(16:0/22:6)	Diacylglycerol	DAG Ester	53980	DMS-MS	100010128		HMDB07121	0.0817	0.0834	0.1118	0.1024	0.0729	0.0616	0.073	0.0826	0.08	0.0763	0.1039	0.1247	0.117	0.1379	0.0939	0.0669	0.0836	0.0891	0.0749	0.132
7581	DAG(16:1/16:1)	Diacylglycerol	DAG Ester	53631	DMS-MS	100009779		HMDB07128	0.2853	0.2662	0.381	0.3231	0.2288	0.2053	0.2049	0.2674	0.2601	0.2428	0.2029	0.3105	0.2408	0.2742	0.2018	0.2679	0.2345	0.2858	0.271	0.31
7582	DAG(16:1/18:0)	Diacylglycerol	DAG Ester	54129	DMS-MS	100010277		HMDB07129	0.6243	0.6063	0.7461	0.6332	0.606	0.4593	0.5078	0.5283	0.4918	0.5053	0.3584	0.4998	0.4733	0.5279	0.3035	0.5697	0.4626	0.586	0.5862	0.6088
7583	DAG(16:1/18:1)	Diacylglycerol	DAG Ester	54130	DMS-MS	100010278		HMDB07131	1.8683	1.6131	2.1601	1.8359	1.5356	1.554	1.7262	2.1245	1.6948	1.8322	1.0711	1.6863	1.513	1.5519	1.0651	1.7057	1.3824	1.6344	1.5939	1.8538
7584	DAG(16:1/18:2)	Diacylglycerol	DAG Ester	53632	DMS-MS	100009780		HMDB07132	0.0906	0.0781	0.1077	0.11	0.0723	0.0877	0.084	0.1195	0.1219	0.1181	0.0874	0.1304	0.0967	0.1182	0.0803	0.1569	0.0603	0.1382	0.094	0.0997
7586	DAG(16:1/20:0)	Diacylglycerol	DAG Ester	54503	DMS-MS	100010651		HMDB07360	0.0716	0.063	0.0683	0.0762	0.0778			0.0822	0.0923	0.1088	0.1323	0.1564	0.1254	0.1223	0.1453	0.1714	0.1463	0.1055	0.0832	0.1114
7587	DAG(16:1/20:2)	Diacylglycerol	DAG Ester	54131	DMS-MS	100010279		HMDB07138	0.0575	0.0337	0.0639	0.0496	0.0514	0.0805	0.0597	0.0989	0.0852		0.0692	0.0705	0.057	0.0856	0.0955	0.121	0.0593	0.0703	0.0679	0.0947
7588	DAG(16:1/20:4)	Diacylglycerol	DAG Ester	53272	DMS-MS	100009420		HMDB07141	0.0471	0.0405	0.0439	0.0286	0.0353		0.0449	0.04		0.034	0.0214	0.0395	0.0324			0.0299		0.0259	0.0213	0.03
7589	DAG(16:1/22:6)	Diacylglycerol	DAG Ester	53459	DMS-MS	100009607		HMDB07150	0.0243	0.0218	0.0354	0.0397	0.024	0.027		0.0303	0.0466	0.0342	0.0321	0.0395	0.0416	0.0427	0.0451	0.039	0.0317	0.02	0.0219	0.0381
7595	DAG(18:0/18:1)	Diacylglycerol	DAG Ester	54504	DMS-MS	100010652		HMDB07160	3.0251	2.6821	3.4841	2.8641	2.7002	2.5786	2.6762	3.4303	3.1243	2.9261	2.3438	2.9282	3.0059	2.717	2.1035	3.5171	3.0334	3.583	3.2454	3.5274
7596	DAG(18:0/18:2)	Diacylglycerol	DAG Ester	53273	DMS-MS	100009421		HMDB07161	0.3072	0.2526	0.3102	0.3267	0.2312	0.2676	0.1942	0.4091	0.3417	0.2939	0.2575	0.2796	0.2707	0.2229	0.2224	0.3315	0.3092	0.3275	0.3318	0.3074
7597	DAG(18:0/18:3)	Diacylglycerol	DAG Ester	53982	DMS-MS	100010130		HMDB07163	0.0503			0.0427	0.0423	0.0378		0.0672						0.0322			0.0524	0.0407	0.0398	0.0413
7599	DAG(18:0/22:6)	Diacylglycerol	DAG Ester	53274	DMS-MS	100009422		HMDB07179	0.1116	0.0864	0.1974	0.1281	0.1025	0.3865	0.079	0.1345	0.8542	0.8061	0.8893	0.0909	0.0704	0.4178	0.8374	0.9014	0.7923	0.2132	0.0905	0.0877
7600	DAG(18:1/18:1)	Diacylglycerol	DAG Ester	53275	DMS-MS	100009423		HMDB07218	4.3045	3.676	5.3136	4.6316	3.8409	4.3711	4.919	6.2343	5.2195	5.2457	2.9673	4.2516	3.9087	3.7489	2.6266	4.6613	3.7963	4.6644	4.4625	4.9316
7601	DAG(18:1/18:2)	Diacylglycerol	DAG Ester	53276	DMS-MS	100009424		HMDB07219	0.4451	0.3405	0.5511	0.5467	0.3744	0.5142	0.3607	0.6999	0.5858	0.5067	0.3571	0.5246	0.4547	0.4172	0.3289	0.5045	0.3863	0.4695	0.4469	0.5275
7602	DAG(18:1/20:1)	Diacylglycerol	DAG Ester	53801	DMS-MS	100009949		HMDB07224	0.4422	0.3604	0.4971	0.4935	0.3988	0.7251	0.861	1.0829	1.0285	1.0608	0.9242	1.2729	1.139	1.0066	0.8094	1.3583	0.9566	1.244	1.1624	1.3101
7603	DAG(18:1/20:2)	Diacylglycerol	DAG Ester	54327	DMS-MS	100010475		HMDB07225	0.18	0.154	0.1922	0.2175	0.1672	0.3852	0.313	0.4824	0.3501	0.3971	0.2676	0.3869	0.3372	0.308	0.2415	0.4596	0.3043	0.4073	0.3474	0.4677
7604	DAG(18:1/20:3)	Diacylglycerol	DAG Ester	53633	DMS-MS	100009781		HMDB07227	0.1557	0.1122	0.2047	0.1736	0.133	0.3166	0.2071	0.4402	0.2923	0.3278	0.221	0.3458	0.3233	0.3386	0.2429	0.5055	0.2918	0.4118	0.3732	0.4754
7605	DAG(18:1/20:4)	Diacylglycerol	DAG Ester	53460	DMS-MS	100009608		HMDB07228	0.2142	0.178	0.2503	0.2333	0.1509	0.1528	0.1517	0.2216	0.1718	0.1434	0.1398	0.2133	0.2297	0.1973	0.1449	0.2117	0.1803	0.2115	0.1808	0.2255
7606	DAG(18:1/20:5)	Diacylglycerol	DAG Ester	53277	DMS-MS	100009425		HMDB07230	0.0453		0.0274	0.0343	0.0267							0.0362	0.039				0.0364		0.0428
7607	DAG(18:1/22:4)	Diacylglycerol	DAG Ester	53278	DMS-MS	100009426		HMDB07234	0.0627	0.0492	0.0684	0.0517	0.0479	0.0612	0.0747	0.0846	0.0817	0.0906	0.0359	0.0309	0.0332			0.0528		0.0311		0.0357
7608	DAG(18:1/22:5)	Diacylglycerol	DAG Ester	53802	DMS-MS	100009950		HMDB07236	0.0624	0.042	0.071	0.0836	0.0577	0.0555	0.0581	0.0741	0.0774	0.0838	0.0462	0.0624	0.0565	0.0597	0.0585		0.0597	0.0429	0.0321	0.0566
7609	DAG(18:1/22:6)	Diacylglycerol	DAG Ester	53461	DMS-MS	100009609		HMDB07237	0.0869	0.0672	0.0839	0.1012	0.067	0.0791	0.0687	0.1149	0.1018	0.0922	0.0634	0.1006	0.0721	0.0999	0.0852	0.0929	0.0796	0.0854	0.0706	0.0777
7486	DCER(16:0)	Sphingolipids	Dihydroceramide	54134	DMS-MS	100010282		HMDB11760	0.4974	0.4477	0.5893	0.5714	0.4756	0.488	0.3569	0.5725	0.5516	0.5299	0.3633	0.3442	0.4047	0.2998	0.3229	0.6222	0.5414	0.5581	0.517	0.5245
7487	DCER(18:0)	Sphingolipids	Dihydroceramide	53464	DMS-MS	100009612		HMDB11761										0.1057
7489	DCER(20:0)	Sphingolipids	Dihydroceramide	53280	DMS-MS	100009428		HMDB11764	0.06										0.078	0.1002		0.0927					0.1189
7490	DCER(20:1)	Sphingolipids	Dihydroceramide	53984	DMS-MS	100010132											0.1397		0.0827			0.0886	0.2283		0.096
7491	DCER(22:0)	Sphingolipids	Dihydroceramide	53465	DMS-MS	100009613		HMDB11765	0.1658	0.1556	0.1629	0.1508	0.1913	0.1365	0.1227	0.1604	0.1732	0.1359	0.1944	0.2401	0.2981	0.216	0.239	0.3289	0.2734	0.3028	0.2808	0.3037
7492	DCER(22:1)	Sphingolipids	Dihydroceramide	53804	DMS-MS	100016011			0.1145	0.1036	0.0914	0.1106	0.1179	0.1449	0.0997	0.1013			0.0869	0.088	0.1081	0.0985		0.1006	0.1097	0.1219	0.0869	0.1061
7494	DCER(24:0)	Sphingolipids	Dihydroceramide	54328	DMS-MS	100010476		HMDB11768	0.2022	0.2	0.2888	0.2705	0.2154	0.3222	0.212	0.2758	0.2765	0.2604	0.234	0.2786	0.2857	0.2063	0.2485	0.3184	0.2378	0.2914	0.3452	0.2991
7495	DCER(24:1)	Sphingolipids	Dihydroceramide	53466	DMS-MS	100009614		HMDB11769	0.3941	0.3159	0.4298	0.3761	0.3257	0.4843	0.3772	0.3823	0.4387	0.3985	0.3171	0.2459	0.3182	0.2611	0.3331	0.3771	0.2451	0.3519	0.3007	0.3445
7497	DCER(26:1)	Sphingolipids	Dihydroceramide	53281	DMS-MS	100009429		HMDB11772		0.1499	0.1097	0.1038		0.0898	0.0952				0.1123	0.1056	0.1004	0.1203	0.1086			0.093	0.0812	0.1061
7411	FFA(12:0)	Free Fatty Acids	Saturated FFA	54508	DMS-MS	100010656	C02679	HMDB00638	0.0739		0.2186						0.0953		0.0935			0.0685		0.0889
7413	FFA(14:0)	Free Fatty Acids	Saturated FFA	53467	DMS-MS	100009615	C06424	HMDB00806	2.0781		4.2106	1.7886		0.6225	1.2428	1.0332	3.7028		5.4841			4.7362		3.8905			0.7953
7424	FFA(14:1)	Free Fatty Acids	Monounsaturated FFA	53985	DMS-MS	100010133	C08322	HMDB02000	0.2217	0.0523	7.1197	0.2518		3.6956	0.1859	0.3428	17.671	2.0134	11.7276		0.0909	11.753		11.8704		0.2169	0.1268
7414	FFA(15:0)	Free Fatty Acids	Saturated FFA	54135	DMS-MS	100010283	C16537	HMDB00826	0.9348	0.6178	8.2318	0.9977		7.5195	1.0803	1.2687	19.5101	9.55	11.9968	0.5569	0.6436	13.0629		12.6774		1.3363	0.7884	0.2823
7415	FFA(16:0)	Free Fatty Acids	Saturated FFA	53986	DMS-MS	100010134	C00249	HMDB00220	26.6411	25.746	27.3765	30.4064		22.1747	23.3047	26.7031	23.6712	18.7096	19.3239	23.434	25.0264	21.0593		23.6613	15.6427	23.7369	30.1405	25.2359
7425	FFA(16:1)	Free Fatty Acids	Monounsaturated FFA	54136	DMS-MS	100010284	C08362	HMDB03229	4.9048	4.0104	5.7232	5.7052		4.2258	3.2747	4.8475	4.4135	3.181	3.364	3.7693	3.8044	4.0836		3.6591	3.3592	4.2195	4.1923	4.1699
7416	FFA(17:0)	Free Fatty Acids	Saturated FFA	53468	DMS-MS	100009616	C17714	HMDB02259	2.1285	2.5265	2.1461	2.2613		2.148	2.3315	2.5208	2.23	2.0018	1.9334	2.2102	2.2204	2.1282		1.9006	1.7143	2.0736	2.1487	2.0909
7417	FFA(18:0)	Free Fatty Acids	Saturated FFA	53805	DMS-MS	100009953	C01530	HMDB00827	32.9029	36.4785	30.932	32.8927		32.1179	31.8887	38.7453	36.241	30.1976	26.3743	30.6308	32.5316	30.7661	8.9514	30.6681	29.8601	32.9519	35.666	34.8184
7426	FFA(18:1)	Free Fatty Acids	Monounsaturated FFA	53469	DMS-MS	100009617	C00712	HMDB00207	33.877	31.3551	38.4105	38.4648	6.6797	35.3123	29.4231	40.6662	37.7094	29.6279	24.679	28.7768	30.2119	28.9688	14.0796	30.5698	28.1402	32.371	35.3593	33.3657
7430	FFA(18:2)	Free Fatty Acids	Polyunsaturated FFA (PUFA)	53635	DMS-MS	100009783	C01595	HMDB00673	3.5035	2.7811	4.3796	3.6671	1.5888	3.0211	2.6817	3.2789	3.2071	2.3132	2.4468	2.8204	2.8167	3.3975	1.8519	2.6187	2.2113	2.2384	2.4077	2.3476
7432	FFA(18:4)	Free Fatty Acids	Polyunsaturated FFA (PUFA)	53636	DMS-MS	100009784	C16300	HMDB06547	0.0996	0.1319	0.251	0.097	0.0909	0.1999	0.1436	0.1226	0.3916	0.2039	0.2558	0.0884	0.1104	0.3485	0.2286	0.2837	0.1871	0.094	0.1177	0.0875
7419	FFA(20:0)	Free Fatty Acids	Saturated FFA	53470	DMS-MS	100009618	C06425	HMDB02212	1.6543	1.8186	1.5793	1.0405	1.6907	1.8343	1.7136	1.8584	2.2748	1.8898	1.6867	1.8139	2.0743	2.2707	1.6772	1.8056	1.8015	1.7403	1.72	1.7682
7427	FFA(20:1)	Free Fatty Acids	Monounsaturated FFA	53987	DMS-MS	100010135	C16526	HMDB34296	2.3177	2.7053	2.6073	2.3884	2.3354	3.5734	3.2771	3.8154	3.9688	4.0965	4.3788	4.1777	4.8613	4.7131	4.2283	4.0423	5.203	5.0736	4.4636	5.0175
7433	FFA(20:2)	Free Fatty Acids	Polyunsaturated FFA (PUFA)	54137	DMS-MS	100010285	C16525	HMDB05060	1.4657	1.3423	1.4449	1.599	1.4153	2.0474	1.712	2.6425	2.2792	1.6713	1.0888	1.3582	1.6092	1.2662	1.0914	1.6512	1.3816	1.6681	1.776	1.8876
7434	FFA(20:3)	Free Fatty Acids	Polyunsaturated FFA (PUFA)	54138	DMS-MS	100010286	C03242	HMDB02925	2.0769	2.1948	1.8756	1.8397	1.9992	2.4628	1.989	3.4358	2.7828	2.1626	1.9744	1.9767	2.8417	2.271	1.8334	2.3092	2.3924	2.6213	2.9558	2.7006
7435	FFA(20:4)	Free Fatty Acids	Polyunsaturated FFA (PUFA)	53471	DMS-MS	100009619	C00219	HMDB01043	2.2849	2.364	2.2229	2.0246	2.4921	1.509	1.3608	2.1251	1.8141	1.5014	2.1165	2.4416	2.9641	2.4775	2.0441	1.3506	1.5808	1.6984	1.7721	1.7059
7436	FFA(20:5)	Free Fatty Acids	Polyunsaturated FFA (PUFA)	54329	DMS-MS	100010477		HMDB01999	0.5099	0.6138	0.7545	0.4901	0.564	0.7094	0.4297	0.5261	1.2912	0.9991	1.0026	0.649	1.0481	1.0809	1.2949	0.9011	0.9771	0.6303	0.5698	0.5816
7421	FFA(22:0)	Free Fatty Acids	Saturated FFA	54139	DMS-MS	100010287	C08281	HMDB00944	0.7344	0.8328	0.6979	0.6843	0.9035	0.6415	0.8671	0.7415	0.7685	0.7978	0.715	0.8158	1.0901	0.9381	0.7499	0.7753	0.7977	0.8291	0.8127	0.8075
7428	FFA(22:1)	Free Fatty Acids	Monounsaturated FFA	53472	DMS-MS	100009620	C08316	HMDB02068	1.2116	1.2316	1.5442	1.3053	1.0275	1.3824	1.1922	1.2769	1.9069	1.6291	1.9249	1.4248	2.328	1.9735	1.7799	1.971	2.4872	2.4969	1.9465	1.8526
7437	FFA(22:2)	Free Fatty Acids	Polyunsaturated FFA (PUFA)	53283	DMS-MS	100009431	C16533	HMDB61714	0.4488	0.5679	0.613	0.4478	0.3597	0.5783	0.4518	0.5232	0.7854	0.753	0.7803	0.5032	0.922	0.7136	0.6118	0.686	0.8711	0.9395	0.6576	0.6469
7438	FFA(22:4)	Free Fatty Acids	Polyunsaturated FFA (PUFA)	53637	DMS-MS	100009785	C16527	HMDB02226	0.289	0.335	0.2668	0.2759	0.3393	0.211	0.2572	0.3021	0.2886	0.2066	0.1825	0.2306	0.3355	0.2904	0.2458	0.1724	0.1742	0.2109	0.2176	0.2125
7439	FFA(22:5)	Free Fatty Acids	Polyunsaturated FFA (PUFA)	54509	DMS-MS	100010657	C16513	HMDB06528	0.8537	0.9264	0.7617	0.7502	0.9535	0.5509	0.6431	0.7527	0.8193	0.6162	0.5444	0.6796	0.7699	0.6649	0.6078	0.4259	0.5304	0.5338	0.4854	0.5508
7440	FFA(22:6)	Free Fatty Acids	Polyunsaturated FFA (PUFA)	53806	DMS-MS	100009954	C06429	HMDB02183	0.6805	0.8754	0.7673	0.6837	0.7838	0.4924	0.6108	0.6291	0.8442	0.7594	0.8002	0.871	0.9762	0.8305	0.8602	0.5983	0.614	0.6272	0.5547	0.6104
7423	FFA(24:0)	Free Fatty Acids	Saturated FFA	53807	DMS-MS	100009955	C08320	HMDB02003	0.3716	0.3486	0.3308	0.3515	0.2853	0.3418	0.4685	0.4174	0.3102	0.3483	0.2935	0.4687	0.573	0.3886	0.3565	0.2512	0.2651	0.4173	0.4057	0.3959
7429	FFA(24:1)	Free Fatty Acids	Monounsaturated FFA	54140	DMS-MS	100010288	C08323	HMDB02368	0.7474	0.7618	1.0641	0.7174	0.4934	0.702	0.8281	0.8159	1.0502	0.967	0.8394	0.6773	1.1643	1.0401	0.8906	0.8289	1.0384	1.1232	0.7502	0.9086
7498	HCER(14:0)	Sphingolipids	Hexosylceramide	53808	DMS-MS	100009956			0.0143										0.0252	0.0195	0.026			0.0345	0.044	0.0403	0.0356	0.0465
7499	HCER(16:0)	Sphingolipids	Hexosylceramide	53809	DMS-MS	100009957		HMDB04971	0.7256	0.7192	0.82	0.8322	0.7872	0.5206	0.4661	0.6187	0.5209	0.5213	1.3118	1.7197	1.7172	1.5342	1.1826	4.502	4.6211	4.9893	4.6835	5.0255
7500	HCER(18:0)	Sphingolipids	Hexosylceramide	53638	DMS-MS	100009786		HMDB04972	0.0608	0.0527	0.0552	0.0746	0.0647		0.0376	0.0358	0.0331	0.038	0.0563	0.0881	0.0656	0.0636	0.0439	0.2117	0.1988	0.2108	0.2163	0.2564
7501	HCER(18:1)	Sphingolipids	Hexosylceramide	53810	DMS-MS	100009958		HMDB04970																		0.0196		0.0254
7502	HCER(20:0)	Sphingolipids	Hexosylceramide	53639	DMS-MS	100009787		HMDB04973	0.0426	0.0396	0.045	0.0501	0.0375		0.0206	0.0295			0.2072	0.2376	0.2511	0.2319	0.1815	0.5852	0.5762	0.5975	0.5815	0.6205
7503	HCER(20:1)	Sphingolipids	Hexosylceramide	54510	DMS-MS	100010658																				0.0192
7504	HCER(22:0)	Sphingolipids	Hexosylceramide	53473	DMS-MS	100009621		HMDB04974	0.3563	0.36	0.44	0.447	0.3614	0.2103	0.1604	0.1989	0.244	0.2073	1.664	2.1431	2.145	2.1024	1.5651	3.5762	3.6183	3.66	3.8523	3.9459
7505	HCER(22:1)	Sphingolipids	Hexosylceramide	53474	DMS-MS	100009622			0.0338	0.0297	0.0312	0.0367							0.0551	0.0631	0.0672	0.0632	0.0513	0.1299	0.1625	0.1421	0.1516	0.1568
7506	HCER(24:0)	Sphingolipids	Hexosylceramide	54511	DMS-MS	100010659		HMDB04978	0.5845	0.6276	0.6046	0.6332	0.5505	0.5985	0.4622	0.5706	0.6013	0.5014	1.7051	2.1492	2.2274	2.0862	1.5215	2.3344	2.5021	2.383	2.4589	2.5964
7507	HCER(24:1)	Sphingolipids	Hexosylceramide	54512	DMS-MS	100010660		HMDB04975	0.4054	0.3981	0.3804	0.4396	0.4136	0.3373	0.2979	0.3595	0.3771	0.3355	0.7095	0.9489	0.876	0.8642	0.6267	1.5411	1.6282	1.5978	1.6514	1.7455
7508	HCER(26:0)	Sphingolipids	Hexosylceramide	53811	DMS-MS	100009959		HMDB04977											0.0436	0.0805	0.0606	0.0632	0.0486	0.044	0.0475	0.0527	0.05	0.0595
7509	HCER(26:1)	Sphingolipids	Hexosylceramide	53988	DMS-MS	100010136		HMDB04976												0.0164	0.0229			0.0275		0.0236	0.0264	0.0273
7510	LCER(14:0)	Sphingolipids	Lactosylceramide	53284	DMS-MS	100009432					0.0354								0.0312				0.0375	0.0315
7511	LCER(16:0)	Sphingolipids	Lactosylceramide	54141	DMS-MS	100010289		HMDB06750	1.9844	1.8411	2.1054	1.9555	2.0471	0.5475	0.4652	0.5802	0.4936	0.41	0.1287	0.1555	0.1857	0.1651	0.1367	0.2375	0.1907	0.2627	0.2361	0.2053
7512	LCER(18:0)	Sphingolipids	Lactosylceramide	53475	DMS-MS	100009623		HMDB11591	0.1883	0.1745	0.1908	0.1899	0.2202	0.0408	0.0402	0.038	0.0471	0.0451	0.0497	0.0474	0.0628	0.0459	0.0574	0.0517	0.0487	0.0663	0.0534	0.0438
7513	LCER(18:1)	Sphingolipids	Lactosylceramide	53476	DMS-MS	100009624		HMDB11592	0.0558	0.0392	0.0272	0.0358	0.0511						0.0288	0.0227		0.046			0.0565	0.0383
7514	LCER(20:0)	Sphingolipids	Lactosylceramide	53477	DMS-MS	100009625		HMDB11593	0.103	0.1079	0.1021	0.1094	0.1092			0.0335								0.0398			0.0359
7516	LCER(22:0)	Sphingolipids	Lactosylceramide	53640	DMS-MS	100009788		HMDB11594	1.0602	0.9597	1.0668	0.9738	1.0291	0.2357	0.1969	0.2701	0.2384	0.1687	0.0775	0.0833	0.0876	0.0922	0.0848	0.1634	0.1622	0.1601	0.1677	0.1749
7517	LCER(22:1)	Sphingolipids	Lactosylceramide	54142	DMS-MS	100010290		HMDB11594	0.0788	0.0683	0.0739	0.0751	0.0957											0.0248
7518	LCER(24:0)	Sphingolipids	Lactosylceramide	53989	DMS-MS	100010137		HMDB11595	1.0731	0.9734	1.0317	0.9939	0.9135	0.4318	0.343	0.4513	0.3576	0.3051	0.0909	0.111	0.0964	0.1103	0.0824	0.1551	0.1192	0.1523	0.1453	0.1432
7519	LCER(24:1)	Sphingolipids	Lactosylceramide	53478	DMS-MS	100009626		HMDB04872	0.8821	0.7218	0.8058	0.7992	0.7794	0.2825	0.2197	0.2379	0.2084	0.2034	0.0634	0.0589	0.0601	0.0637	0.0626	0.1398	0.122	0.1327	0.1241	0.12
6483	LPC(16:0)	Lysophosphatidylcholine	LPC Ester	53287	DMS-MS	100009435	C04102	HMDB10382	3.7543	2.1911	4.5052	4.4257	2.4876	2.6405	1.8832	2.968	2.8314	1.6133	2.0191	2.3013	2.3143	1.9321	1.6235	2.6508	2.2207	2.6026	2.4052	3.2811
6484	LPC(16:1)	Lysophosphatidylcholine	LPC Ester	53479	DMS-MS	100009627		HMDB10383	0.6942
6486	LPC(18:0)	Lysophosphatidylcholine	LPC Ester	54144	DMS-MS	100010292		HMDB10384	4.4805	2.0822	4.8309	4.5939	3.1341	3.7915	3.1693	3.9116	4.1396	3.0506	1.3395	2.1341	1.9591	1.8193	1.881	2.9881	2.3604	2.6366	2.5868	2.5174
6487	LPC(18:1)	Lysophosphatidylcholine	LPC Ester	54145	DMS-MS	100010293			5.3026	3.2118	7.382	6.0075	4.1038	5.3487	3.7358	4.5292	4.4521	3.9305	4.4471	4.2168	2.8823	5.3875	2.6088	3.0363	4.8325	3.4853	2.5262	3.861
6491	LPC(20:0)	Lysophosphatidylcholine	LPC Ester	53480	DMS-MS	100009628		HMDB10390						0.6771		0.7777			0.5753	0.9529	0.7598	1.1946	0.9953	1.1139	0.6634	0.7921	0.9883
6492	LPC(20:1)	Lysophosphatidylcholine	LPC Ester	53813	DMS-MS	100009961		HMDB10391			0.9408			0.7194						0.7885	0.4869	0.9245		0.8033				0.9817
6494	LPC(20:3)	Lysophosphatidylcholine	LPC Ester	54146	DMS-MS	100010294		HMDB10394											0.4715
6740	LPE(16:0)	Lysophosphatidylethanolamine	LPE Ester	54516	DMS-MS	100010664		HMDB11503	0.3071	0.2311	0.3433	0.3106	0.2817	0.1622	0.1345	0.1537	0.162	0.1548	0.0719	0.0693	0.1135	0.0723	0.0869	0.1062	0.1023	0.1028	0.1176	0.1013
6741	LPE(16:1)	Lysophosphatidylethanolamine	LPE Ester	54147	DMS-MS	100010295		HMDB11474	0.0817	0.0876	0.0935	0.0808	0.0835	0.055	0.0664	0.0662	0.0546	0.0737	0.0441	0.0445	0.0308	0.0452	0.0373	0.0416	0.0573	0.0664	0.0702	0.0817
6742	LPE(17:0)	Lysophosphatidylethanolamine	LPE Ester	53993	DMS-MS	100010141			0.0428				0.0366
6743	LPE(18:0)	Lysophosphatidylethanolamine	LPE Ester	53484	DMS-MS	100009632		HMDB11130	1.9656	1.0902	2.0212	1.9358	1.3428	1.3699	1.0633	1.4332	1.5337	1.0624	0.2647	0.4244	0.5536	0.3668	0.4182	0.7012	0.4666	0.6954	0.6451	0.9028
6744	LPE(18:1)	Lysophosphatidylethanolamine	LPE Ester	53288	DMS-MS	100009436		HMDB11476	0.9937	0.8822	1.1818	1.1649	0.9117	1.0075	0.7981	1.0144	1.0751	1.1223	0.563	0.5605	0.4561	0.601	0.4594	0.5055	0.657	0.63	0.466	0.6407
6745	LPE(18:2)	Lysophosphatidylethanolamine	LPE Ester	53817	DMS-MS	100009965		HMDB11477	0.0413	0.0406	0.0664	0.0344		0.0344					0.0273					0.0359	0.0353		0.03
6749	LPE(20:1)	Lysophosphatidylethanolamine	LPE Ester	53647	DMS-MS	100009795		HMDB11482	0.1061	0.1068	0.1453	0.1527	0.1104	0.16	0.1435	0.168	0.161	0.1554	0.0332	0.0356	0.0437	0.0552	0.0381	0.0541	0.0553	0.0585	0.072	0.0564
6750	LPE(20:2)	Lysophosphatidylethanolamine	LPE Ester	53818	DMS-MS	100009966		HMDB11483	0.0437	0.0654	0.0765	0.0753	0.0546	0.0818	0.0715	0.0745	0.07	0.0753		0.0326		0.0358			0.0652	0.0487	0.0502	0.0508
6751	LPE(20:3)	Lysophosphatidylethanolamine	LPE Ester	54334	DMS-MS	100010482		HMDB11486	0.0876	0.0752	0.1194	0.1153	0.0781	0.0755	0.0837	0.11	0.0878	0.1313	0.1043	0.0599	0.0437	0.1054	0.047	0.1149	0.1689	0.1254	0.1058	0.136
6752	LPE(20:4)	Lysophosphatidylethanolamine	LPE Ester	53485	DMS-MS	100009633		HMDB11487	0.174	0.2057	0.2138	0.2175	0.1817	0.1464	0.1397	0.1865	0.1844	0.1905	0.1214	0.1035	0.0902	0.1077	0.1085	0.1561	0.2154	0.1707	0.121	0.1451
6757	LPE(22:4)	Lysophosphatidylethanolamine	LPE Ester	53487	DMS-MS	100009635		HMDB11493	0.1094	0.1215	0.1583	0.1683	0.1116	0.0743	0.0553	0.0892	0.0643	0.0637	0.0645	0.0706	0.059	0.0594	0.0615	0.0507	0.0573	0.0595	0.0584	0.068
6758	LPE(22:5)	Lysophosphatidylethanolamine	LPE Ester	54519	DMS-MS	100010667		HMDB11495	0.2122	0.2797	0.3489	0.3024	0.2476	0.1277	0.1274	0.1517	0.1356	0.1489	0.1503	0.1502	0.2004	0.2003	0.1904	0.1775	0.209	0.2002	0.1963	0.2295
6759	LPE(22:6)	Lysophosphatidylethanolamine	LPE Ester	53649	DMS-MS	100009797		HMDB11496	0.0923	0.0882	0.1129	0.1266	0.0726	0.0662	0.0462	0.0649	0.0737	0.065	0.0639	0.0796	0.0635	0.0678	0.0608	0.0709	0.0978	0.0787	0.0591	0.0709
10104	MAG(14:0)	MAG	Ester	62028	DMS-MS	100020155			0.6948	0.6257	0.724	0.5201	0.6145	0.3539	0.5077	0.5099	0.4667	0.5226	0.4059	0.4258	0.6373	0.3977	0.7136	0.5595	0.5826	0.4863	0.4638	0.5056
10105	MAG(14:1)	MAG	Ester	62004	DMS-MS	100020131			0.1021		0.0966	0.109								0.0656
10106	MAG(15:0)	MAG	Ester	62005	DMS-MS	100020132			0.2328	0.2527	1.6546	0.2429	0.2695	1.3166	0.3534	0.3255	5.7515	4.1659	3.0905	0.2141	0.2474	2.8303	4.7363	4.3261	4.108	0.8622	0.2504	0.2483
10107	MAG(16:0)	MAG	Ester	62006	DMS-MS	100020133			4.7344	3.3313	5.5248	3.3528	4.2176	2.798	3.662	4.2018	3.6274	3.3116	3.1098	3.0907	5.7986	3.4026	4.9423	4.2164	4.939	4.4488	3.6327	4.7423
10108	MAG(16:1)	MAG	Ester	62007	DMS-MS	100020134			1.4623	1.2224	1.747	1.7691	1.3656	1.1748	1.1466	1.304	1.3952	1.3342	1.1558	1.2294	1.3391	1.1181	1.5478	1.6181	1.2299	1.7157	1.12	1.2352
10109	MAG(17:0)	MAG	Ester	62008	DMS-MS	100020135			0.2704	0.1693	0.2637	0.1983	0.1835	0.2654	0.2588	0.3585	0.2967	0.2663	0.2242	0.2175	0.3719	0.2557	0.2613	0.2484	0.2922	0.3156	0.2455	0.2803
10110	MAG(18:0)	MAG	Ester	62009	DMS-MS	100020136			6.8247	3.9668	8.2662	2.6536	6.0383	4.2293	5.9302	7.3856	5.9872	5.2111	5.3731	4.1095	11.2552	5.4126	8.264	7.6429	8.6166	6.9853	7.2049	7.7873
10111	MAG(18:1)	MAG	Ester	62010	DMS-MS	100020137			8.5825	8.1847	11.0479	10.9213	8.97	9.066	8.9202	11.4501	11.604	10.0881	7.4972	8.7994	8.7526	7.2795	7.6609	9.6302	8.865	10.7995	7.6551	9.5869
10112	MAG(18:2)	MAG	Ester	62011	DMS-MS	100020138			0.4246	0.3829	0.5274	0.5731	0.4267	0.4026	0.3883	0.461	0.534	0.5327	0.3827	0.4029	0.4349	0.3794	0.3216	0.4275	0.3954	0.4242	0.3713	0.4262
10113	MAG(18:3)	MAG	Ester	62012	DMS-MS	100020139				0.1093			0.1043	0.0944	0.0913	0.0891	0.1283			0.0916	0.0917	0.1186					0.0987	0.096
10115	MAG(20:0)	MAG	Ester	62014	DMS-MS	100020141			0.1225	0.0767	0.1075		0.1081	0.1012	0.094	0.1294					0.1642	0.1102	0.2211	0.1659	0.1338	0.1514	0.1221	0.1428
10116	MAG(20:1)	MAG	Ester	62015	DMS-MS	100020142			0.175	0.1915	0.2133	0.1962	0.1863	0.3897	0.2887	0.3594	0.3536	0.365	0.2706	0.2495	0.2924	0.2562	0.268	0.3894	0.3534	0.4052	0.3651	0.4441
10117	MAG(20:2)	MAG	Ester	62016	DMS-MS	100020143			0.337	0.3677	0.2772	0.3192	0.4538	0.6146	0.7085	0.8449	0.8924	0.9045	0.293	0.2827	0.4079	0.2729	0.2764	0.5864	0.4461	0.6311	0.47	0.6605
10118	MAG(20:3)	MAG	Ester	62017	DMS-MS	100020144			0.6621	0.7603	0.6148	0.5295	0.7738	0.9943	1.0868	1.1196	1.4216	1.3819	0.5702	0.7292	0.7782	0.6123	0.4648	1.307	0.9168	1.1657	0.9967	1.2057
10119	MAG(20:4)	MAG	Ester	62018	DMS-MS	100020145			0.3712	0.5578	0.3947	0.3582	0.6259	0.2923	0.3451	0.3952	0.4258	0.5477	0.3769	0.4144	0.4603	0.4609	0.3819	0.4812	0.3114	0.4294	0.3688	0.3533
10122	MAG(22:1)	MAG	Ester	62021	DMS-MS	100020148				0.0721			0.1067	0.111						0.0549		0.0887				0.1265	0.0833	0.093
10123	MAG(22:2)	MAG	Ester	62022	DMS-MS	100020149								0.0657														0.0924
10124	MAG(22:4)	MAG	Ester	62023	DMS-MS	100020150			0.0726	0.1061		0.077	0.0806							0.063								0.064
10125	MAG(22:5)	MAG	Ester	62024	DMS-MS	100020151			0.1554	0.1202	0.1443	0.1344	0.1527	0.0843	0.123	0.1107		0.1407	0.1739	0.0939	0.1155	0.1226	0.1288			0.1055	0.0781	0.1355
6259	PC(12:0/16:1)	Phosphatidylcholine	PC Ester	53820	DMS-MS	100009968				0.2441	0.3132	0.2361					0.2687		0.1504		0.1604				0.2253	0.2218	0.224
6260	PC(12:0/18:1)	Phosphatidylcholine	PC Ester	54335	DMS-MS	100010483			0.9011	1.1486	1.0468	1.1514	0.9622	1.1568	1.0894	1.5622	1.0261	1.3283	0.3394	0.5861	0.5839	0.4742	0.4183	0.6879	0.5936	0.77	0.7488	0.6755
6264	PC(12:0/20:1)	Phosphatidylcholine	PC Ester	53291	DMS-MS	100009439												0.2262
6271	PC(12:0/22:5)	Phosphatidylcholine	PC Ester	54522	DMS-MS	100010670																		0.3102				0.4097
6273	PC(14:0/14:0)	Phosphatidylcholine	PC Ester	53293	DMS-MS	100009441		HMDB07866	0.9525	1.2569	1.3572	1.2872	1.0979	0.8731	0.7614	1.0851	0.976	0.9005	0.7348	1.016	0.9683	0.9117	0.812	1.0367	0.9767	0.9687	0.864	1.0815
6275	PC(14:0/16:1)	Phosphatidylcholine	PC Ester	54151	DMS-MS	100010299		HMDB07870	5.3168	7.2731	7.2099	6.5033	6.4377	6.1629	6.0648	7.0003	6.995	7.1751	5.8855	7.5016	7.8864	6.9854	5.7601	9.375	7.8724	9.4061	8.2494	10.6202
6276	PC(14:0/18:1)	Phosphatidylcholine	PC Ester	53996	DMS-MS	100010144		HMDB07873	23.4332	24.3896	27.7562	25.0946	24.7132	27.3263	25.2422	32.6447	30.5942	29.8931	15.5249	22.1072	20.765	19.5189	15.8696	19.8045	18.5641	23.059	20.4319	21.7803
6277	PC(14:0/18:2)	Phosphatidylcholine	PC Ester	54152	DMS-MS	100010300		HMDB07874	1.1622	1.5684	1.4649	1.0299	1.251	0.9104	0.6785	1.016	1.0605	0.8484	0.727	0.9905	1.1017	0.9183	0.7123	0.9565	0.7807	0.8909	0.8449	0.8048
6280	PC(14:0/20:1)	Phosphatidylcholine	PC Ester	54337	DMS-MS	100010485		HMDB07879	1.0186	1.2715	1.1268	0.9586	1.0534	2.0353	1.9641	2.451	2.42	2.3653	0.5197	0.7569	0.7669	0.8148	0.5896	1.1015	0.9062	1.0732	1.02	1.115
6281	PC(14:0/20:2)	Phosphatidylcholine	PC Ester	53652	DMS-MS	100009800		HMDB07880	0.5639	0.7316	0.5534	0.5676	0.7146	0.8182	0.7377	1.2092	0.9551	0.9755	0.2692	0.354	0.3206	0.5029	0.2283	0.5073	0.4269	0.4115	0.5761	0.5571
6282	PC(14:0/20:3)	Phosphatidylcholine	PC Ester	53823	DMS-MS	100009971		HMDB07882	0.7256	0.8302	0.5691	0.8466	0.7377	0.9297	0.8164	1.3133	0.958	1.0976	0.7932	0.9734	1.0719	0.8492	0.8305	1.0807	1.0865	1.0142	1.1065	1.1672
6283	PC(14:0/20:4)	Phosphatidylcholine	PC Ester	54338	DMS-MS	100010486		HMDB07883	1.8509	1.938	1.8612	1.6303	1.7889	1.5081	1.0553	1.673	1.6129	1.6349	2.3906	2.9969	2.8912	2.4914	2.2685	1.8036	1.8594	2.2969	1.8899	2.0707
6284	PC(14:0/20:5)	Phosphatidylcholine	PC Ester	54523	DMS-MS	100010671		HMDB07885		0.3311										0.4401	0.3929				0.3015
6285	PC(14:0/22:1)	Phosphatidylcholine	PC Ester	53653	DMS-MS	100009801		HMDB07887	0.2551	0.2363		0.35	0.3318	0.4911	0.4981	0.6262	0.4932	0.5957						0.2222
6286	PC(14:0/22:2)	Phosphatidylcholine	PC Ester	53997	DMS-MS	100010145		HMDB07888						0.3579	0.2851		0.4383	0.3104		0.2396	0.1987			0.2308	0.2259	0.2145	0.2997	0.3048
6287	PC(14:0/22:4)	Phosphatidylcholine	PC Ester	54153	DMS-MS	100010301		HMDB07889	0.4939	0.6231	0.7532	0.8489	0.7223	0.3897	0.4972	0.6568	0.4842	0.4041	0.6164	0.729	0.7889	0.7044	0.7049	0.6178	0.6506	0.4303	0.4824	0.5404
6288	PC(14:0/22:5)	Phosphatidylcholine	PC Ester	53998	DMS-MS	100010146		HMDB07891	1.1781	1.6916	1.441	1.2483	1.102	0.9143	0.9256	0.881	1.0545	0.8006	1.9767	2.4941	2.3233	2.1301	1.8142	1.2339	1.3379	1.4067	1.2763	1.2211
6289	PC(14:0/22:6)	Phosphatidylcholine	PC Ester	53999	DMS-MS	100010147		HMDB07892	1.0158	1.2103	1.4634	0.9207	1.2918		0.7602	1.5538	1.5285	1.0776	1.2516	1.5485	1.6311	1.5135	0.9682	0.9843	0.7664	1.0824	0.9986	1.09
6291	PC(15:0/16:1)	Phosphatidylcholine	PC Ester	54525	DMS-MS	100010673		HMDB07936	0.6668	0.5599	0.6113	0.611	0.7848	0.6563	0.4437	0.9744	0.8413	0.9853	0.452	0.6707	0.6123	0.5118	0.4731	0.6226	0.6365	0.7304	0.6018	0.5572
6292	PC(15:0/18:1)	Phosphatidylcholine	PC Ester	54526	DMS-MS	100010674		HMDB07939	1.7264	1.8812	2.1669	2.0164	2.1109	2.5973	2.2777	2.9695	2.8411	2.6433	1.0041	1.5323	1.4715	1.1923	0.9717	1.5916	1.6265	1.7554	1.5117	1.6936
6293	PC(15:0/18:2)	Phosphatidylcholine	PC Ester	54154	DMS-MS	100010302		HMDB07940		0.2175													0.2012
6301	PC(16:0/12:0)	Phosphatidylcholine	PC Ester	54527	DMS-MS	100010675			0.6621	0.8201	0.8547	0.8527	0.9422	0.5719	0.6279	0.6915	0.6507	0.6587	0.4582	0.67	0.5625	0.6298	0.4171	0.5691	0.6122	0.5065	0.6394	0.5963
6302	PC(16:0/14:0)	Phosphatidylcholine	PC Ester	53490	DMS-MS	100009638		HMDB07965	10.8418	13.4089	13.9173	13.2818	12.7965	8.527	8.5922	10.3749	10.6029	9.8725	8.1868	11.2108	10.008	9.4826	7.8613	11.6647	10.3601	11.2363	10.1385	11.7857
6303	PC(16:0/14:1)	Phosphatidylcholine	PC Ester	54340	DMS-MS	100010488		HMDB07966	0.3141	0.2929	0.3987		0.4289	0.2519			0.3341		0.1741		0.2852	0.2588	0.158	0.3938	0.195	0.3451	0.3124
6304	PC(16:0/16:0)	Phosphatidylcholine	PC Ester	53655	DMS-MS	100009803		HMDB00564	32.1114	35.57	38.9398	36.7423	36.9347	28.7672	28.5474	36.705	34.3881	30.4618	24.1358	32.8704	31.1095	26.9438	23.8903	31.7477	29.4056	30.0781	27.5891	33.9721
6305	PC(16:0/16:1)	Phosphatidylcholine	PC Ester	53491	DMS-MS	100009639		HMDB07969	45.9374	52.2885	56.2566	54.5845	54.602	51.9331	49.3817	64.7159	61.0086	55.1744	34.6011	48.1101	47.1861	39.8069	34.5226	67.6657	61.1584	67.7765	59.9814	69.538
6306	PC(16:0/18:0)	Phosphatidylcholine	PC Ester	54157	DMS-MS	100010305		HMDB07970	12.85	13.1401	15.7683	15.1284	14.3411	13.2266	12.5385	15.4133	14.4074	12.4224	6.8838	9.1429	8.0584	8.0884	6.3143	9.0818	9.1693	9.5627	9.4051	10.3247
6307	PC(16:0/18:1)	Phosphatidylcholine	PC Ester	53656	DMS-MS	100009804	C13875	HMDB07972	184.711	183.829	223.236	212.557	208.986	246.253	222.574	288.045	266.522	257.115	113.423	155.95	156.247	140.927	112.306	168.709	160.971	185.609	173.488	186.887
6308	PC(16:0/18:2)	Phosphatidylcholine	PC Ester	54341	DMS-MS	100010489		HMDB07973	11.916	12.516	14.5009	13.1784	13.3853	9.5361	7.8406	11.1686	10.2948	9.723	8.2333	11.2641	10.6177	9.7936	7.5337	11.5075	10.8031	12.1044	10.7938	12.2709
6309	PC(16:0/18:3)	Phosphatidylcholine	PC Ester	53825	DMS-MS	100009973		HMDB07975	0.826	0.8579	1.0995	0.7091	0.8728	0.5442	0.5493	0.843	0.7875	0.5842	0.4118	0.6688	0.4925	0.4362	0.4164	0.7636	0.5524	0.6001	0.7694	0.6686
6311	PC(16:0/20:1)	Phosphatidylcholine	PC Ester	53657	DMS-MS	100009805		HMDB07978	3.8928	3.4836	4.6271	4.1485	3.7906	8.5777	7.0863	9.3665	7.9243	8.1198	3.0512	4.3984	4.3328	4.0327	3.3103	4.8151	4.0959	4.7075	4.8595	5.286
6312	PC(16:0/20:2)	Phosphatidylcholine	PC Ester	54528	DMS-MS	100010676		HMDB07979	2.2116	2.6895	2.7618	2.5181	2.4806	4.4829	3.7803	4.622	4.1055	3.852	1.609	2.0041	2.0306	1.794	1.4314	3.0242	2.5537	2.6206	3.1011	3.065
6313	PC(16:0/20:3)	Phosphatidylcholine	PC Ester	53296	DMS-MS	100009444		HMDB07981	4.2962	4.1374	4.1237	4.727	4.0918	4.8771	4.5181	6.1469	4.9392	5.3393	5.1151	6.6003	6.7256	5.3797	4.7039	8.1996	7.8729	8.2076	8.3011	8.6613
6314	PC(16:0/20:4)	Phosphatidylcholine	PC Ester	54158	DMS-MS	100010306		HMDB07982	8.249	9.912	10.6041	10.3368	9.8332	7.2645	7.074	9.1481	7.7539	7.8476	12.7356	16.8694	16.7798	14.1371	11.9515	13.0514	11.8467	13.8695	11.804	12.5681
6315	PC(16:0/20:5)	Phosphatidylcholine	PC Ester	54159	DMS-MS	100010307		HMDB07984	1.3157	1.2142	1.5747	1.4078	0.951	0.9848	0.7272	0.9373	0.62	0.9388	1.2248	1.9024	1.4954	1.3604	1.084	1.3342	1.1172	1.4842	1.41	1.6803
6316	PC(16:0/22:1)	Phosphatidylcholine	PC Ester	54160	DMS-MS	100010308		HMDB07986	0.5452	0.4538	0.6106	0.4573	0.5622	1.0804	1.1224	1.4141	1.1981	1.0768	0.2546	0.4102	0.3278	0.312	0.2219	0.4126	0.3352	0.4829	0.5597	0.5026
6317	PC(16:0/22:2)	Phosphatidylcholine	PC Ester	54002	DMS-MS	100010150		HMDB07987	0.4352	0.291	0.3716	0.3842	0.3131	0.7318	0.5385	0.7682	0.7181	0.5853	0.3002	0.302	0.3071	0.2982	0.2435	0.4783	0.4898	0.4247	0.4905	0.6789
6318	PC(16:0/22:4)	Phosphatidylcholine	PC Ester	54161	DMS-MS	100010309		HMDB07988	1.7477	1.8985	2.1824	2.5627	2.0684	1.1614	1.2012	1.83	1.7433	1.3301	1.7714	2.3397	1.6124	1.6212	1.3613	1.4264	1.2797	1.1014	1.1057	1.3554
6319	PC(16:0/22:5)	Phosphatidylcholine	PC Ester	54529	DMS-MS	100010677		HMDB07990	5.3868	5.3272	5.4706	5.9045	5.1595	3.2127	3.4334	4.8804	4.2372	3.4447	4.4284	6.4623	6.3559	5.0714	4.6515	4.2234	4.3979	4.3806	4.4517	4.3102
6320	PC(16:0/22:6)	Phosphatidylcholine	PC Ester	54003	DMS-MS	100010151		HMDB07991	5.2908	4.4628	6.3984	5.181	5.309	3.8575	2.6355	4.3859	4.4219	3.5032	4.2269	5.094	4.8717	5.7079	3.7866	4.134	3.3108	4.1175	4.2129	4.0041
6321	PC(17:0/14:1)	Phosphatidylcholine	PC Ester	54342	DMS-MS	100010490				0.194		0.2596
6322	PC(17:0/16:1)	Phosphatidylcholine	PC Ester	53658	DMS-MS	100009806			0.6768	0.6261	0.7397	0.6327	0.9149	0.7859	0.6348	0.7821	0.8703	0.7967	0.5532	0.6434	0.4975	0.4085	0.4583	0.6223	0.6365	0.7835	0.4962	0.562
6323	PC(17:0/18:1)	Phosphatidylcholine	PC Ester	54162	DMS-MS	100010310			1.9607	1.8954	2.3402	2.5508	2.1275	2.7119	2.5858	3.717	3.3334	2.7934	1.3541	1.6753	1.5766	1.3534	1.2615	1.5241	1.5117	1.6756	1.857	1.7725
6324	PC(17:0/18:2)	Phosphatidylcholine	PC Ester	54163	DMS-MS	100010311			0.3651	0.3989		0.2157	0.3416		0.2441	0.3657		0.3119	0.2486	0.3481	0.2098	0.3077	0.2135	0.2845	0.2461	0.2846	0.3648	0.3234
6326	PC(17:0/20:3)	Phosphatidylcholine	PC Ester	54343	DMS-MS	100010491							0.1899								0.2535					0.1923
6327	PC(17:0/20:4)	Phosphatidylcholine	PC Ester	53826	DMS-MS	100009974					0.2771								0.1846			0.2438
6332	PC(18:0/12:0)	Phosphatidylcholine	PC Ester	53828	DMS-MS	100009976			1.076	1.2762	1.137	1.1569	1.1446	1.2113	1.0598	1.3737	1.1151	0.9355	0.5127	0.7938	0.7868	0.5892	0.4974	0.9666	0.74	1.1529	1.1874	1.1466
6333	PC(18:0/14:0)	Phosphatidylcholine	PC Ester	54004	DMS-MS	100010152		HMDB08031	3.5341	3.6726	4.6138	4.3964	3.8362	2.9302	2.5528	3.3264	2.7937	2.5992	1.9764	2.5476	2.5732	2.0946	1.8314	2.3334	2.042	2.4336	2.333	2.4826
6335	PC(18:0/16:1)	Phosphatidylcholine	PC Ester	53830	DMS-MS	100009978		HMDB08035	11.7106	12.706	15.4898	14.9063	14.7598	16.6762	15.4995	20.46	19.9392	17.3603	6.8088	9.2796	8.3167	7.8662	6.8849	12.2618	10.6759	11.203	11.7737	13.3091
6336	PC(18:0/18:0)	Phosphatidylcholine	PC Ester	53660	DMS-MS	100009808		HMDB08036	2.6087	3.122	3.3837	3.1375	2.7869	3.9805	3.6119	4.6024	4.0927	3.7885	1.5256	2.3676	2.2832	2.0509	1.7375	2.5537	2.3131	3.0519	3.0339	2.8271
6337	PC(18:0/18:1)	Phosphatidylcholine	PC Ester	54530	DMS-MS	100010678		HMDB08038	62.5762	57.7315	74.7543	77.6637	66.9319	106.779	98.0031	129.07	111.671	108.183	35.0875	50.4773	45.4268	42.785	34.7597	53.6138	50.6942	59.355	56.8807	60.2916
6338	PC(18:0/18:2)	Phosphatidylcholine	PC Ester	54345	DMS-MS	100010493		HMDB08039	7.64	8.4317	9.4141	9.2475	8.2446	7.8824	6.8282	10.5891	8.4157	7.9853	4.5946	6.3208	5.7157	5.5476	4.4346	7.575	6.3534	7.3066	7.2914	7.6348
6339	PC(18:0/18:3)	Phosphatidylcholine	PC Ester	54164	DMS-MS	100010312		HMDB08040	0.4743	0.4728	0.5332	0.5084	0.5228	0.6618	0.4909	0.7165	0.6704	0.5049	0.2257	0.2725	0.3554	0.2863	0.2471	0.4689	0.2521	0.3685	0.3723	0.4322
6341	PC(18:0/20:0)	Phosphatidylcholine	PC Ester	54166	DMS-MS	100010314		HMDB08043	1.1812	1.0068	1.5735	1.3167	1.1944	0.9658	1.1719	1.34	1.3405	1.1871	0.9228	1.6384	1.273	1.2245	1.0771	1.1015	0.9775	1.0652	1.1089	1.0835
6342	PC(18:0/20:1)	Phosphatidylcholine	PC Ester	53299	DMS-MS	100009447		HMDB08044	0.8273	0.7364	1.0868	1.1514	0.9082	2.6737	2.3658	3.0369	2.681	2.3653	0.7637	0.9969	0.9538	0.9253	0.8827	1.3038	1.1793	1.2128	1.5274	1.3044
6343	PC(18:0/20:2)	Phosphatidylcholine	PC Ester	53300	DMS-MS	100009448		HMDB08045	0.8483	1.0526	1.3238	0.9328	1.204	2.6966	2.1271	2.9335	2.9086	2.5499	0.5978	0.9306	0.9289	0.6911	0.5856	1.2078	1.0422	1.3822	1.5792	1.5104
6344	PC(18:0/20:3)	Phosphatidylcholine	PC Ester	54531	DMS-MS	100010679		HMDB08047	2.4933	2.5713	2.8974	3.1036	3.1543	4.6584	4.726	6.0509	5.1503	5.2781	3.1402	3.8004	3.9221	3.2073	2.7735	5.7818	4.8983	5.7192	5.3355	6.4603
6345	PC(18:0/20:4)	Phosphatidylcholine	PC Ester	54167	DMS-MS	100010315		HMDB08048	6.3533	6.7224	7.0449	6.9513	6.3246	6.8963	6.7319	8.4184	7.8649	7.4219	7.8626	11.0811	10.3923	9.3097	7.5646	9.2156	9.1603	9.2602	8.6047	10.3752
6346	PC(18:0/20:5)	Phosphatidylcholine	PC Ester	54168	DMS-MS	100010316		HMDB08050	1.0423	0.8463	0.9873	0.9768	0.6877	1.0366	0.7873	1.1716	1.1895	0.7773	0.815	1.1462	1.0526	0.7471	0.8401	0.8688	0.8778	0.8764	1.3917	1.1452
6347	PC(18:0/22:1)	Phosphatidylcholine	PC Ester	54169	DMS-MS	100010317		HMDB08052						0.3056	0.3179	0.4465	0.4819	0.3159
6348	PC(18:0/22:2)	Phosphatidylcholine	PC Ester	53661	DMS-MS	100009809		HMDB08053						0.2823			0.306
6349	PC(18:0/22:4)	Phosphatidylcholine	PC Ester	53831	DMS-MS	100009979		HMDB08054	1.0065	0.7363	1.0416	0.8817	1.0852	0.9614	1.0069	1.4245	1.0638	0.8916	0.4793	0.7162	0.5643	0.4789	0.494	0.6066	0.5782	0.4942	0.5473	0.6777
6350	PC(18:0/22:5)	Phosphatidylcholine	PC Ester	53662	DMS-MS	100009810		HMDB08056	2.767	2.7183	2.5797	2.6307	2.5542	2.4326	2.136	2.9483	2.9718	2.6402	1.7364	2.5849	2.2149	1.9389	1.6983	2.0376	1.7989	1.8627	2.2031	2.1915
6351	PC(18:0/22:6)	Phosphatidylcholine	PC Ester	54170	DMS-MS	100010318		HMDB08057	3.9764	3.0559	3.8148	3.5268	2.7745	2.794	2.399	3.157	3.1481	2.5453	2.298	2.5181	2.722	2.8215	1.9148	2.7314	2.2317	2.377	2.7014	2.3313
6352	PC(18:1/14:1)	Phosphatidylcholine	PC Ester	53301	DMS-MS	100009449		HMDB08098		0.228			0.2696
6353	PC(18:1/16:1)	Phosphatidylcholine	PC Ester	54346	DMS-MS	100010494		HMDB08101	47.5359	45.8628	59.2127	51.4618	51.0646	57.9756	56.2502	70.6965	65.6547	65.1612	29.8654	44.662	43.6828	37.4864	31.2287	43.2597	40.9392	47.8773	44.6666	49.1253
6354	PC(18:1/18:1)	Phosphatidylcholine	PC Ester	53832	DMS-MS	100009980		HMDB00593	90.677	80.2399	105.864	96.6513	93.5673	136.203	121.336	165.348	147.544	141.728	50.2305	74.2182	65.057	67.6647	48.6052	76.0642	72.5905	82.4838	82.0544	86.1954
6355	PC(18:1/18:2)	Phosphatidylcholine	PC Ester	53833	DMS-MS	100009981		HMDB08105	10.95	11.2528	13.7617	11.6362	11.8567	10.6021	9.3914	13.6084	12.5585	11.1567	7.3255	10.5362	8.8596	9.3202	6.7324	9.8504	9.4032	10.7302	10.5176	11.3392
6356	PC(18:1/18:3)	Phosphatidylcholine	PC Ester	54347	DMS-MS	100010495		HMDB08107	0.7168	0.6013	0.7192	0.8092	0.7915	0.6215	0.6138	0.8696	0.7969	0.7172	0.3608	0.5662	0.527	0.4187	0.377	0.4709	0.5272	0.5646	0.6317	0.5622
6358	PC(18:1/20:1)	Phosphatidylcholine	PC Ester	53493	DMS-MS	100009641		HMDB08110	2.1903	2.4673	3.407	2.7767	2.8367	6.7279	6.096	7.912	7.1117	7.2813	3.1714	4.486	3.8852	4.4194	2.7075	4.6083	4.6025	4.907	4.87	4.8915
6359	PC(18:1/20:2)	Phosphatidylcholine	PC Ester	54171	DMS-MS	100010319		HMDB08111	2.0203	2.1	2.8491	2.3564	2.3269	4.4079	3.2472	4.8509	4.5955	4.3329	1.7234	2.2989	1.9462	2.1774	1.5376	3.1691	2.2691	3.0481	2.7675	3.1697
6360	PC(18:1/20:3)	Phosphatidylcholine	PC Ester	54532	DMS-MS	100010680		HMDB08113	3.1837	2.9797	3.6011	3.7106	3.3349	5.8715	5.1215	6.6326	5.4542	6.5463	4.9715	6.4103	6.2201	5.7984	4.5644	8.721	7.3599	8.4585	8.5878	8.7709
6361	PC(18:1/20:4)	Phosphatidylcholine	PC Ester	54172	DMS-MS	100010320		HMDB08114	8.249	7.4895	9.3959	9.2753	8.4771	7.7885	7.6926	9.9045	8.257	8.6373	11.7697	17.9208	14.3597	14.1659	11.5587	14.0088	11.9047	12.1287	11.4106	14.1283
6362	PC(18:1/20:5)	Phosphatidylcholine	PC Ester	53494	DMS-MS	100009642		HMDB08116	1.0167	1.1498	1.2505	0.9289	1.0454	1.0366	0.9485	0.9021	1.06	1.0064	1.2502	1.6875	1.1833	1.1962	1.1179	1.373	1.2901	1.394	1.4558	1.7445
6363	PC(18:1/22:1)	Phosphatidylcholine	PC Ester	53302	DMS-MS	100009450		HMDB08118	0.2644	0.2502	0.3084	0.2784	0.2748	0.7039	0.5447	0.8686	0.7909	0.6443	0.3064	0.3498	0.3374	0.3537	0.2437	0.3417	0.3166	0.336	0.3249	0.4146
6364	PC(18:1/22:2)	Phosphatidylcholine	PC Ester	53495	DMS-MS	100009643		HMDB08119						0.3342	0.3303	0.5046	0.3794	0.3964		0.1935		0.2722		0.2955	0.1946	0.3018	0.3197	0.2529
6365	PC(18:1/22:4)	Phosphatidylcholine	PC Ester	53834	DMS-MS	100009982		HMDB08120	1.4009	1.0467	1.3144	1.3353	1.3001	0.9307	1.1161	1.6083	1.1706	1.1328	0.6775	1.1108	0.9271	0.9658	0.8234	0.9077	0.6217	0.7096	0.9373	0.94
6366	PC(18:1/22:5)	Phosphatidylcholine	PC Ester	53663	DMS-MS	100009811		HMDB08122	3.7281	3.4337	3.2201	4.0421	3.4587	2.7262	2.6027	3.8529	3.0293	3.2033	2.763	3.7307	3.6234	3.0534	2.6458	2.637	3.0344	3.0895	2.9248	2.9597
6367	PC(18:1/22:6)	Phosphatidylcholine	PC Ester	53496	DMS-MS	100009644		HMDB08123	5.5071	4.3418	5.5305	4.8376	4.4953	3.8139	4.0884	4.2799	3.8577	3.4484	3.3676	4.4718	4.2484	4.589	3.4316	4.2669	3.6296	3.1693	3.2963	4.1464
6369	PC(18:2/16:1)	Phosphatidylcholine	PC Ester	54173	DMS-MS	100010321		HMDB08134	2.3783	2.7737	2.5534	2.7122	2.7496	2.2126	1.4916	2.4684	2.2326	2.2867	1.9006	2.6951	2.142	2.2768	1.5513	2.3237	1.8499	2.2291	2.3245	2.409
6370	PC(18:2/18:2)	Phosphatidylcholine	PC Ester	53304	DMS-MS	100009452		HMDB08138	1.6427	2.1579	2.2007	1.9007	1.8253	1.8525	1.6936	1.9533	1.7644	1.7922	1.7216	1.9534	1.7235	1.8721	1.6831	2.0701	1.7499	1.8676	1.8398	2.0314
6371	PC(18:2/18:3)	Phosphatidylcholine	PC Ester	53835	DMS-MS	100009983		HMDB08141	0.8443	0.9244	0.714	0.8536	0.7185	0.8402	0.8063	0.9535	0.5974	0.8527	0.6235	0.7989	0.8282	0.7979	0.7639	0.8115	0.8265	0.6238	0.8153	0.7766
6373	PC(18:2/20:1)	Phosphatidylcholine	PC Ester	53305	DMS-MS	100009453		HMDB08144	0.448	0.4776	0.5704	0.4469	0.4671	0.7148	0.5887	0.9629	0.9303	0.5574	0.8485	1.0569	1.0277	0.8516	0.7411	0.7733	0.8508	0.8617	0.7764	1.0256
6374	PC(18:2/20:2)	Phosphatidylcholine	PC Ester	53836	DMS-MS	100009984		HMDB08145				0.2601	0.2989	0.3073		0.3872	0.5444	0.368	0.2301	0.4171	0.3111	0.3156		0.3255	0.3482	0.282	0.3974	0.392
6375	PC(18:2/20:3)	Phosphatidylcholine	PC Ester	53497	DMS-MS	100009645		HMDB08146	0.9894	1.0411	0.8951	1.0263	1.0028	1.0341	1.1004	1.1634	1.0198	1.0539	1.1099	1.0781	1.2691	1.2561	1.0619	1.0512	1.4178	1.2756	1.3663	1.3006
6376	PC(18:2/20:4)	Phosphatidylcholine	PC Ester	54533	DMS-MS	100010681		HMDB08147	3.7787	4.3201	4.2531	3.7809	3.8086	3.8942	4.3521	4.2893	3.4108	3.8497	3.7912	5.021	3.9888	4.5685	3.8441	4.4781	3.9296	3.9182	3.5154	3.9329
6377	PC(18:2/20:5)	Phosphatidylcholine	PC Ester	53665	DMS-MS	100009813		HMDB08149	0.9483	1.063	1.145	0.8065	0.7718	1.0366	0.8631	1.1027	1.24	1.0473	0.8313	1.0825	0.9655	0.7901	0.9711	1.0239	0.6051	0.8061	0.8332	1.1987
6380	PC(18:2/22:4)	Phosphatidylcholine	PC Ester	54535	DMS-MS	100010683		HMDB08153	0.646	1.0106	0.7309	0.904	1.0703	0.6153	0.8508	1.0095	0.5989	0.7462	0.7441	1.0483	0.645	0.7044	0.8014	0.9896	0.5846	0.7494	0.6346	0.7796
6381	PC(18:2/22:5)	Phosphatidylcholine	PC Ester	53498	DMS-MS	100009646		HMDB08155	1.1096	1.2455	0.9874	0.927	1.1465	1.166	0.886	1.2285	1.2558	1.097	1.1849	1.4951	0.9751	1.1277	1.0482	1.1211	1.0307	1.1359	0.9724	1.0351
6382	PC(18:2/22:6)	Phosphatidylcholine	PC Ester	54349	DMS-MS	100010497		HMDB08156	2.3459	1.6792	2.0588	2.1519	1.7474	1.8595	1.6361	2.2365	1.6195	1.7105	1.916	2.055	2.086	2.4972	2.0224	1.9046	1.8587	1.5457	2.0743	1.7983
6384	PC(20:0/16:1)	Phosphatidylcholine	PC Ester	53837	DMS-MS	100009985		HMDB08266	1.0724	1.1471	1.2528	1.4032	1.1165	1.7616	1.5384	2.0995	1.8475	1.6093	1.0608	1.3225	1.3062	1.3389	0.989	1.4434	1.2321	1.3089	1.6694	1.5505
6385	PC(20:0/18:1)	Phosphatidylcholine	PC Ester	53306	DMS-MS	100009454		HMDB08269	3.8832	4.2729	4.5338	4.4129	3.8362	6.5969	6.0354	7.1309	7.2838	6.3855	3.3447	5.1414	4.7299	4.783	3.7451	4.4689	4.4956	4.7275	5.0164	5.2123
6386	PC(20:0/18:2)	Phosphatidylcholine	PC Ester	53307	DMS-MS	100009455		HMDB08270	0.3981	0.4561	0.5077	0.3235	0.3458	0.3534		0.5135	0.4186	0.3486	0.3211	0.4444	0.3532	0.3366	0.4542	0.3509	0.4077	0.4834	0.4922	0.5164
6391	PC(20:0/20:3)	Phosphatidylcholine	PC Ester	54175	DMS-MS	100010323		HMDB08278						0.2807	0.2772	0.2924		0.2367	0.1993	0.2572	0.2689	0.2897	0.21	0.3322	0.315	0.3192	0.3584	0.5157
6392	PC(20:0/20:4)	Phosphatidylcholine	PC Ester	53308	DMS-MS	100009456		HMDB08279	0.5425	0.4354	0.468	0.4815	0.3734	0.4531	0.427	0.3874	0.4809	0.3373	0.7016	0.9731	0.7496	0.9149	0.6876	0.6177	0.5952	0.5612	0.587	0.6391
6396	PC(20:0/22:5)	Phosphatidylcholine	PC Ester	54178	DMS-MS	100010326		HMDB08287												0.3231					0.2646		0.3748
6510	PE(14:0/18:1)	Phosphatidylethanolamine	PE Ester	54538	DMS-MS	100010686		HMDB08828	0.2658	0.2644	0.3344	0.2825	0.2789	0.2084	0.1788	0.189	0.2124	0.2311	0.1267	0.1399	0.1431	0.131	0.1003	0.2037	0.2012	0.198	0.1922	0.2041
6531	PE(15:0/18:1)	Phosphatidylethanolamine	PE Ester	53669	DMS-MS	100009817		HMDB08894	0.1631				0.1662													0.093
6544	PE(16:0/14:0)	Phosphatidylethanolamine	PE Ester	53844	DMS-MS	100009992		HMDB08920	0.0588
6547	PE(16:0/16:0)	Phosphatidylethanolamine	PE Ester	54006	DMS-MS	100010154		HMDB08923	0.2776	0.2273	0.2802	0.235	0.2214	0.1191	0.1146	0.161	0.1328	0.1442	0.0999	0.1144	0.1302	0.1419	0.1046	0.1442	0.1159	0.1305	0.1201	0.1433
6548	PE(16:0/16:1)	Phosphatidylethanolamine	PE Ester	53672	DMS-MS	100009820		HMDB08924	0.9269	0.9072	0.9821	0.9803	0.8812	0.6219	0.6248	0.7049	0.6624	0.7098	0.4623	0.656	0.6489	0.5999	0.5091	0.8514	0.7338	0.9236	0.7798	0.926
6551	PE(16:0/18:1)	Phosphatidylethanolamine	PE Ester	54007	DMS-MS	100010155	C13877	HMDB08927	9.8323	8.3734	9.4086	9.4973	8.8699	7.0618	6.6201	8.0652	8.5242	8.9246	5.4992	7.0382	6.9623	6.7278	5.1	6.9373	6.193	7.4003	6.1786	6.9487
6552	PE(16:0/18:2)	Phosphatidylethanolamine	PE Ester	53502	DMS-MS	100009650		HMDB08928	0.7793	0.5983	0.7701	0.8387	0.6266	0.3254	0.3603	0.3875	0.4747	0.3333	0.294	0.3718	0.3766	0.3983	0.314	0.4941	0.4422	0.5458	0.5215	0.6181
6555	PE(16:0/20:1)	Phosphatidylethanolamine	PE Ester	54185	DMS-MS	100010333		HMDB08933	0.1729	0.1901	0.2395	0.2265	0.2022	0.2393	0.2571	0.3049	0.3637	0.3411	0.0681	0.0933	0.0859	0.0785	0.059	0.112	0.1069	0.1422	0.123	0.0944
6556	PE(16:0/20:2)	Phosphatidylethanolamine	PE Ester	53315	DMS-MS	100009463		HMDB08934	0.1828	0.1686	0.1784	0.239	0.1383	0.1991	0.2106	0.2657	0.1879	0.2482		0.1197	0.1267	0.1068	0.1028	0.1926	0.1411	0.1683	0.1712	0.1696
6557	PE(16:0/20:3)	Phosphatidylethanolamine	PE Ester	54543	DMS-MS	100010691		HMDB08936	0.4146	0.3593	0.499	0.4119	0.4431	0.4669	0.421	0.4449	0.5538	0.4359	0.395	0.5327	0.4629	0.3827	0.4004	0.6233	0.6425	0.781	0.7079	0.7274
6558	PE(16:0/20:4)	Phosphatidylethanolamine	PE Ester	54544	DMS-MS	100010692		HMDB08937	2.677	2.5675	2.9982	3.2728	2.9143	2.5656	2.2213	2.5702	2.5314	2.2697	1.7105	2.6379	2.4462	2.3227	1.7962	2.7412	3.1674	3.0895	3.0158	3.3705
6559	PE(16:0/20:5)	Phosphatidylethanolamine	PE Ester	54008	DMS-MS	100010156		HMDB08939	0.3113	0.2074	0.3635							0.2396							0.2201		0.3007	0.2225
6560	PE(16:0/22:1)	Phosphatidylethanolamine	PE Ester	53316	DMS-MS	100009464		HMDB08941						0.0466	0.0713		0.0714	0.0608
6561	PE(16:0/22:2)	Phosphatidylethanolamine	PE Ester	54186	DMS-MS	100010334		HMDB08942						0.1073			0.1104	0.0614								0.0578
6562	PE(16:0/22:4)	Phosphatidylethanolamine	PE Ester	54358	DMS-MS	100010506		HMDB08943	0.6973	0.6524	0.8134	0.7077	0.7039	0.3761	0.3584	0.4147	0.3766	0.3742	0.2959	0.3035	0.3631	0.4014	0.3434	0.3351	0.3999	0.3545	0.4339	0.3315
6563	PE(16:0/22:5)	Phosphatidylethanolamine	PE Ester	54359	DMS-MS	100010507		HMDB08945	1.0394	1.0295	0.9812	0.8447	1.0726	0.4971	0.5179	0.6212	0.4878	0.5315	0.6416	0.8715	0.8261	0.6356	0.582	0.7295	0.6861	0.8138	0.7396	0.8082
6564	PE(16:0/22:6)	Phosphatidylethanolamine	PE Ester	53845	DMS-MS	100009993		HMDB08946	1.9287	1.8557	1.7248	1.5852	1.9232	1.0872	0.8518	1.2475	1.375	1.0954	0.6333	0.7561	0.7955	0.7048	0.629	0.8877	0.9443	1.1432	1.054	0.9898
6570	PE(17:0/16:1)	Phosphatidylethanolamine	PE Ester	53846	DMS-MS	100009994				0.1501			0.1583
6572	PE(17:0/18:1)	Phosphatidylethanolamine	PE Ester	53317	DMS-MS	100009465			0.7504	0.9062	0.982	1.0007	0.8714	0.6563	0.5916	0.7661	0.8656	0.7425	0.3699	0.4816	0.5944	0.5879	0.3976	0.4069	0.4212	0.3804	0.5287	0.4923
6573	PE(17:0/18:2)	Phosphatidylethanolamine	PE Ester	54009	DMS-MS	100010157							0.0979
6577	PE(17:0/20:3)	Phosphatidylethanolamine	PE Ester	53673	DMS-MS	100009821															0.0987					0.1041
6578	PE(17:0/20:4)	Phosphatidylethanolamine	PE Ester	53503	DMS-MS	100009651			0.2281	0.3303	0.3084	0.2945	0.2949	0.3341	0.195	0.2153	0.2933	0.2883	0.179	0.1589	0.2658	0.196	0.1401	0.255	0.2607	0.2791	0.2453	0.273
6582	PE(17:0/22:4)	Phosphatidylethanolamine	PE Ester	54010	DMS-MS	100010158							0.1089
6583	PE(17:0/22:5)	Phosphatidylethanolamine	PE Ester	53505	DMS-MS	100009653			0.2679	0.2214	0.2767	0.1993	0.2299	0.1631				0.1403		0.1725
6584	PE(17:0/22:6)	Phosphatidylethanolamine	PE Ester	54189	DMS-MS	100010337			0.2411	0.2097		0.2945	0.2574	0.1492	0.1604		0.176				0.1305	0.1258				0.1561
6585	PE(18:0/14:0)	Phosphatidylethanolamine	PE Ester	54546	DMS-MS	100010694		HMDB08986		0.062		0.0624	0.0482
6587	PE(18:0/15:0)	Phosphatidylethanolamine	PE Ester	53506	DMS-MS	100009654		HMDB08988					0.1068
6588	PE(18:0/16:0)	Phosphatidylethanolamine	PE Ester	53507	DMS-MS	100009655		HMDB08989	0.4811	0.4256	0.4564	0.5127	0.4504	0.3165	0.3174	0.3695	0.3837	0.427	0.1775	0.2514	0.2231	0.22	0.216	0.2861	0.2653	0.3214	0.272	0.3105
6589	PE(18:0/16:1)	Phosphatidylethanolamine	PE Ester	54191	DMS-MS	100010339		HMDB08990	0.9892	1.0288	1.1117	1.1593	1.1218	0.837	0.7846	0.9635	1.0581	0.9904	0.4364	0.5586	0.5654	0.5338	0.4294	0.8114	0.6955	0.8165	0.7318	0.8826
6590	PE(18:0/17:0)	Phosphatidylethanolamine	PE Ester	53508	DMS-MS	100009656			0.219	0.2241		0.2824	0.2042	0.1685	0.1203	0.235	0.262	0.1818		0.1493
6591	PE(18:0/18:0)	Phosphatidylethanolamine	PE Ester	54547	DMS-MS	100010695		HMDB08991	1.9038	1.9491	2.0501	1.9429	1.924	1.954	1.7089	2.0294	2.1427	2.0699	1.4788	1.9283	1.9184	1.6585	1.4169	1.9844	1.9044	2.1559	1.9665	2.0805
6592	PE(18:0/18:1)	Phosphatidylethanolamine	PE Ester	54548	DMS-MS	100010696		HMDB08993	25.4236	26.4145	29.0105	27.5334	26.6525	26.2832	24.6875	29.1327	31.7986	31.0689	19.2776	24.0249	23.8932	21.9867	17.9666	24.7405	22.6233	24.3153	23.5305	23.6782
6593	PE(18:0/18:2)	Phosphatidylethanolamine	PE Ester	54011	DMS-MS	100010159		HMDB08994	3.7685	4.0282	4.6671	4.4928	4.0982	2.6356	2.2591	2.8233	3.1937	2.6636	1.5734	2.3654	1.9848	1.8134	1.4992	2.399	2.6585	2.8259	2.4506	2.9801
6594	PE(18:0/18:3)	Phosphatidylethanolamine	PE Ester	53847	DMS-MS	100009995		HMDB08996	0.5168	0.3084	0.3943	0.3921	0.4075	0.3343	0.3368	0.3486	0.3333	0.3311	0.1746	0.1544	0.1859	0.1728	0.1334	0.2206	0.2123	0.2283	0.202	0.2087
6596	PE(18:0/20:1)	Phosphatidylethanolamine	PE Ester	54363	DMS-MS	100010511		HMDB08999	0.347	0.3156	0.3133	0.3726	0.3762	0.6098	0.5756	0.672	0.6133	0.7131	0.1858	0.2193	0.2329	0.1876	0.192	0.285	0.2692	0.2619	0.2447	0.2898
6597	PE(18:0/20:2)	Phosphatidylethanolamine	PE Ester	54012	DMS-MS	100010160		HMDB09000	1.0544	0.9486	1.1726	1.1672	1.1086	2.0285	1.8988	2.4136	2.3615	1.9858	1.0249	1.4525	1.3382	1.3287	0.9123	2.0914	2.0983	2.3414	2.3706	2.4601
6598	PE(18:0/20:3)	Phosphatidylethanolamine	PE Ester	54549	DMS-MS	100010697		HMDB09002	4.888	5.1413	5.7881	5.4193	5.2007	6.9472	6.9421	7.7005	8.0811	6.8108	5.9457	7.494	6.5185	5.7952	5.2069	11.5384	10.8153	13.05	12.3987	12.3402
6599	PE(18:0/20:4)	Phosphatidylethanolamine	PE Ester	54013	DMS-MS	100010161		HMDB09003	30.3933	33.1616	37.4793	38.7957	34.1203	34.2894	32.605	39.2906	39.924	34.3776	23.7818	32.9631	30.4682	28.9797	22.9069	42.0727	43.2372	44.4691	42.7394	46.6456
6600	PE(18:0/20:5)	Phosphatidylethanolamine	PE Ester	54192	DMS-MS	100010340		HMDB09005	2.1125	2.4894	3.0594	2.9089	2.6488	2.75	2.4216	2.7733	3.1935	2.7525	1.2665	1.7834	1.3933	1.2885	1.1508	2.58	2.3317	2.9454	2.4481	2.7954
6602	PE(18:0/22:2)	Phosphatidylethanolamine	PE Ester	54014	DMS-MS	100010162		HMDB09008	0.14	0.1251	0.1923	0.1461	0.1196	0.2558	0.2797	0.3303	0.3677	0.251	0.0777	0.0898	0.0738	0.0904		0.1304	0.1471	0.1479	0.1568	0.1523
6603	PE(18:0/22:4)	Phosphatidylethanolamine	PE Ester	53674	DMS-MS	100009822		HMDB09009	6.3603	6.4264	7.7882	7.6156	6.361	4.7496	4.6757	5.354	5.7305	4.4552	1.6487	2.3233	2.143	1.9656	1.5862	2.1124	1.9452	2.0165	1.9515	2.2318
6604	PE(18:0/22:5)	Phosphatidylethanolamine	PE Ester	53319	DMS-MS	100009467		HMDB09011	11.8917	11.94	13.7286	10.662	11.6443	8.4215	7.8811	9.1004	9.6545	8.4419	3.802	5.4579	5.2345	3.8996	3.6868	4.6216	3.9653	4.4251	4.1077	4.512
6605	PE(18:0/22:6)	Phosphatidylethanolamine	PE Ester	54193	DMS-MS	100010341		HMDB09012	18.1902	19.3389	17.8271	18.6118	19.3158	14.1171	11.6444	15.3409	16.4876	13.0852	4.4879	7.1138	6.7714	6.0888	4.7319	6.672	6.5317	7.8656	6.5619	6.3208
6606	PE(18:1/14:1)	Phosphatidylethanolamine	PE Ester	53320	DMS-MS	100009468		HMDB09053	0.1149	0.1139	0.1015	0.0936	0.0844	0.1416	0.1212	0.1177	0.142	0.1425							0.0613	0.051	0.063	0.0556
6607	PE(18:1/16:1)	Phosphatidylethanolamine	PE Ester	54550	DMS-MS	100010698		HMDB09056	2.4396	2.3761	2.5065	2.6851	2.4423	2.3444	2.1605	2.6587	2.7254	2.8391	0.9301	1.1551	1.1681	1.1025	0.7911	1.284	1.2214	1.4385	1.3816	1.3645
6608	PE(18:1/18:1)	Phosphatidylethanolamine	PE Ester	53321	DMS-MS	100009469		HMDB09059	8.7719	8.7257	9.5419	9.4132	9.3677	10.9378	10.1922	12.1753	13.063	14.0103	5.6989	7.4772	8.0348	7.0921	5.8003	8.1595	6.8937	8.679	7.3407	8.2877
6609	PE(18:1/18:2)	Phosphatidylethanolamine	PE Ester	54551	DMS-MS	100010699		HMDB09060	1.6295	1.5682	1.838	1.7908	1.577	1.3631	0.9362	1.491	1.4444	1.3625	0.6241	0.8934	0.8716	0.7406	0.6029	1.048	1.0512	1.2625	1.1149	1.3062
6610	PE(18:1/18:3)	Phosphatidylethanolamine	PE Ester	54194	DMS-MS	100010342		HMDB09062		0.0929		0.1335	0.1602	0.1428	0.0997	0.1305	0.1416	0.1256			0.095		0.0586	0.095		0.1023		0.1112
6612	PE(18:1/20:1)	Phosphatidylethanolamine	PE Ester	53322	DMS-MS	100009470		HMDB09065	0.447	0.4179	0.5378	0.4567	0.5178	0.8303	0.76	0.9647	1.0116	1.0619	0.3883	0.4443	0.4987	0.5134	0.4054	0.6042	0.4646	0.5959	0.4915	0.5091
6613	PE(18:1/20:2)	Phosphatidylethanolamine	PE Ester	54552	DMS-MS	100010700		HMDB09066	0.4278	0.397	0.4607	0.4985	0.4285	0.756	0.6943	0.8507	1.0121	0.7893	0.3024	0.4217	0.3955	0.422	0.322	0.524	0.4625	0.556	0.5615	0.6496
6614	PE(18:1/20:3)	Phosphatidylethanolamine	PE Ester	54195	DMS-MS	100010343		HMDB09068	0.9655	0.9921	1.2005	1.0425	0.9954	1.5696	1.423	1.5337	1.6548	1.6239	0.8929	1.2643	1.0632	1.0055	0.9107	1.8164	1.6025	1.9726	2.0332	1.9692
6615	PE(18:1/20:4)	Phosphatidylethanolamine	PE Ester	54364	DMS-MS	100010512		HMDB09069	6.7322	7.2719	8.3462	8.7187	7.2222	8.4129	7.9123	9.1746	8.512	8.7976	3.6981	5.5883	5.3472	4.9305	4.2506	6.223	6.2965	6.8194	6.0315	7.2218
6616	PE(18:1/20:5)	Phosphatidylethanolamine	PE Ester	53675	DMS-MS	100009823		HMDB09071	0.5107	0.7261	0.7413	0.7531	0.7166	0.775	0.4669	0.9822	0.763	0.7923	0.3132	0.3353	0.4128	0.2155		0.3692	0.4333	0.572	0.46	0.529
6617	PE(18:1/22:0)	Phosphatidylethanolamine	PE Ester	55177	DMS-MS	100013437			0.5058	0.5347	0.5468	0.4664	0.4879	0.5547	0.5376	0.5903	0.92	1.2611	0.8275	0.8602	0.8801	0.6721	0.5443	0.4932	0.5316	0.5293	0.4314	0.4516
6618	PE(18:1/22:1)	Phosphatidylethanolamine	PE Ester	54365	DMS-MS	100010513		HMDB09073	0.1226	0.1351	0.1372	0.1218	0.128	0.193	0.1699	0.1939	0.2098	0.2014	0.0863	0.0907	0.1254	0.1088	0.1011	0.0821	0.0766	0.0693	0.0631	0.0817
6619	PE(18:1/22:2)	Phosphatidylethanolamine	PE Ester	54553	DMS-MS	100010701		HMDB09074	0.1018	0.0917			0.0701	0.1259	0.1432	0.162	0.168	0.1426			0.0521			0.0784	0.0814	0.0829	0.088	0.1089
6620	PE(18:1/22:4)	Phosphatidylethanolamine	PE Ester	53323	DMS-MS	100009471		HMDB09075	1.1321	1.1783	1.4225	1.3058	1.3089	1.0614	1.0495	1.1782	0.9778	0.9256	0.3828	0.6896	0.4323	0.4225	0.3487	0.5245	0.3976	0.4822	0.56	0.5061
6621	PE(18:1/22:5)	Phosphatidylethanolamine	PE Ester	53324	DMS-MS	100009472		HMDB09077	1.8799	1.9263	2.1961	1.7894	1.8984	1.6749	1.4186	1.8655	1.6362	1.8248	0.8792	1.1834	1.1081	0.8292	0.8575	1.0154	0.9	0.9857	0.9435	0.9692
6622	PE(18:1/22:6)	Phosphatidylethanolamine	PE Ester	53509	DMS-MS	100009657		HMDB09078	4.5867	4.9257	4.3868	5.3457	4.9165	4.541	3.4798	4.6751	4.508	3.905	1.208	1.8031	1.6891	1.9302	1.1258	1.6596	1.4708	1.9195	2.0623	1.5883
6624	PE(18:2/16:1)	Phosphatidylethanolamine	PE Ester	53510	DMS-MS	100009658		HMDB09089	0.2018	0.2113	0.1954	0.2151	0.1943	0.16	0.1243	0.1439	0.1818	0.1209	0.0656		0.0579		0.0548		0.1031	0.0935
6625	PE(18:2/18:2)	Phosphatidylethanolamine	PE Ester	53325	DMS-MS	100009473		HMDB09093				0.0599	0.035			0.0542
6628	PE(18:2/20:1)	Phosphatidylethanolamine	PE Ester	54196	DMS-MS	100010344		HMDB09098	0.0797	0.0556	0.0922	0.0745	0.0692	0.0843	0.0828	0.1019	0.116	0.1177		0.0546	0.0589			0.0641	0.0498	0.054	0.0737	0.038
6629	PE(18:2/20:2)	Phosphatidylethanolamine	PE Ester	54197	DMS-MS	100010345		HMDB09099					0.0814
6630	PE(18:2/20:3)	Phosphatidylethanolamine	PE Ester	54017	DMS-MS	100010165		HMDB09101		0.0942		0.1461	0.1353	0.1173	0.1679	0.1582		0.1282	0.0707		0.1143	0.1186	0.0824	0.1522	0.1326	0.1836	0.1875	0.1446
6631	PE(18:2/20:4)	Phosphatidylethanolamine	PE Ester	54555	DMS-MS	100010703		HMDB09102	0.4949	0.4372	0.4244	0.6129	0.4881	0.4318	0.3953	0.4928	0.3354	0.2901	0.1794	0.279	0.2489	0.2215	0.2194	0.3035	0.4423	0.3736	0.4097	0.3543
6635	PE(18:2/22:4)	Phosphatidylethanolamine	PE Ester	53327	DMS-MS	100009475		HMDB09108	0.2704	0.2219	0.319	0.4022	0.3126		0.1941	0.1746	0.1603	0.1485		0.1841	0.0837			0.1748	0.1243	0.1003	0.1512	0.1653
6636	PE(18:2/22:5)	Phosphatidylethanolamine	PE Ester	53848	DMS-MS	100009996		HMDB09110	0.2815	0.3632	0.3519	0.3823	0.3819	0.1586	0.1987	0.2045	0.2236	0.1394	0.147	0.2735	0.2946	0.1813	0.1828	0.274	0.2153	0.2315	0.2627	0.3476
6637	PE(18:2/22:6)	Phosphatidylethanolamine	PE Ester	53677	DMS-MS	100009825		HMDB09111	0.472	0.5321	0.4339	0.5055	0.445	0.3618	0.2751	0.5591	0.3846	0.253	0.2318	0.5324	0.4048	0.45		0.3522	0.3481	0.4123	0.4864	0.5282
6640	PE(O-16:0/16:0)	Phosphatidylethanolamine	PE Ether	53849	DMS-MS	100009997		HMDB11158	0.3211	0.3224	0.3389	0.4092	0.3361	0.1116	0.0871	0.1464	0.1165	0.1149	0.0772	0.0813	0.1301	0.163	0.1119	0.1945	0.1504	0.1692	0.1846	0.1574
6641	PE(O-16:0/16:1)	Phosphatidylethanolamine	PE Ether	54557	DMS-MS	100010705			0.1746	0.1573	0.226	0.1743	0.1271	0.1522	0.095	0.15	0.1686	0.1695	0.0817	0.1035	0.1076	0.1067	0.0812	0.1396	0.159	0.1782	0.1715	0.1509
6642	PE(O-16:0/18:0)	Phosphatidylethanolamine	PE Ether	54558	DMS-MS	100010706		HMDB11157	0.1506	0.1274	0.1839	0.1437	0.1237	0.1092	0.108	0.1057	0.1221	0.1284	0.0407				0.0366	0.0615	0.0536	0.067	0.0792
6643	PE(O-16:0/18:1)	Phosphatidylethanolamine	PE Ether	54366	DMS-MS	100010514		HMDB11157	2.3549	2.1233	2.624	2.4367	2.0865	2.3576	1.9761	2.377	2.2714	2.5794	0.502	0.6645	0.7396	0.7346	0.4903	1.1821	1.0547	1.3467	1.3314	1.2592
6644	PE(O-16:0/18:2)	Phosphatidylethanolamine	PE Ether	53850	DMS-MS	100009998			0.1588	0.1224	0.1706	0.1771	0.1114	0.1052	0.1069	0.0969	0.1239	0.0984						0.0784		0.0574		0.0845
6647	PE(O-16:0/20:1)	Phosphatidylethanolamine	PE Ether	54367	DMS-MS	100010515			0.8998	0.8773	1.0921	1.012	0.8863	1.3277	1.2149	1.5026	1.3621	1.6595	0.1553	0.1711	0.1591	0.1647	0.1329	0.5504	0.5221	0.5158	0.4751	0.5851
6648	PE(O-16:0/20:2)	Phosphatidylethanolamine	PE Ether	53511	DMS-MS	100009659			0.4154	0.4339	0.4746	0.4829	0.4061	0.5569	0.4656	0.585	0.6363	0.5746	0.0805	0.0909	0.106		0.0807	0.2389	0.2556	0.2806	0.3199	0.3029
6649	PE(O-16:0/20:3)	Phosphatidylethanolamine	PE Ether	54200	DMS-MS	100010348			0.2895	0.2944	0.4165	0.3455	0.343	0.4353	0.3777	0.4815	0.5239	0.422	0.0974	0.1502	0.1251	0.0867	0.0887	0.2916	0.3229	0.3643	0.3566	0.3746
6650	PE(O-16:0/20:4)	Phosphatidylethanolamine	PE Ether	53329	DMS-MS	100009477			1.277	1.1606	1.7918	1.6015	1.3755	1.1672	1.2116	1.2348	1.155	1.1869	0.325	0.5758	0.6027	0.4125	0.4331	0.9299	0.8698	0.9377	0.7564	1.078
6651	PE(O-16:0/20:5)	Phosphatidylethanolamine	PE Ether	53330	DMS-MS	100009478			0.2848	0.2674		0.4457	0.3255	0.25				0.2794			0.1468				0.2185		0.2694	0.2862
6652	PE(O-16:0/22:1)	Phosphatidylethanolamine	PE Ether	53851	DMS-MS	100009999			0.2248	0.2258	0.238	0.2265	0.2133	0.4433	0.4001	0.422	0.4248	0.5491					0.0389	0.1325	0.1069	0.1188	0.1354	0.1725
6653	PE(O-16:0/22:2)	Phosphatidylethanolamine	PE Ether	54201	DMS-MS	100010349			0.1899	0.1552	0.24	0.2229	0.1731	0.2979	0.2501	0.2528	0.3394	0.304	0.0705	0.1033	0.1147	0.1205	0.0785	0.3284	0.2916	0.3277	0.3231	0.4482
6654	PE(O-16:0/22:4)	Phosphatidylethanolamine	PE Ether	53852	DMS-MS	100010000			1.8047	1.4668	2.3538	2.4123	1.8555	1.2062	1.0438	1.3668	1.2626	1.1913	1.0586	1.3591	1.2465	1.2153	1.0294	1.6292	1.6944	1.6524	1.6558	1.7384
6655	PE(O-16:0/22:5)	Phosphatidylethanolamine	PE Ether	53331	DMS-MS	100009479			2.0768	1.8505	2.3425	2.108	2.0928	1.6628	1.4931	1.733	1.7033	1.6668	1.9946	2.5714	2.563	2.1708	1.957	3.351	3.0639	3.689	3.4597	3.3082
6656	PE(O-16:0/22:6)	Phosphatidylethanolamine	PE Ether	53332	DMS-MS	100009480			1.799	1.7283	1.497	1.3769	1.729	1.51	1.3212	1.5563	1.4755	1.6195	1.1604	1.7091	1.7494	1.3772	1.2509	2.1323	1.7058	2.3972	2.2903	2.4215
6658	PE(O-18:0/16:0)	Phosphatidylethanolamine	PE Ether	53333	DMS-MS	100009481			0.7869	0.8213	1.0424	1.0838	0.8002	0.3871	0.3688	0.4281	0.4129	0.4358	0.3171	0.4282	0.424	0.3811	0.3111	0.618	0.4378	0.5743	0.5352	0.6057
6659	PE(O-18:0/16:1)	Phosphatidylethanolamine	PE Ether	53334	DMS-MS	100009482			0.3929	0.4324	0.6161	0.4177	0.424	0.29	0.2179	0.2988	0.312	0.3543	0.233	0.258	0.2445	0.2489	0.1903	0.4452	0.3726	0.4015	0.3997	0.4093
6660	PE(O-18:0/18:0)	Phosphatidylethanolamine	PE Ether	53853	DMS-MS	100010001			0.24	0.1718	0.2757	0.2009	0.2081	0.1599	0.1263	0.1817	0.1355	0.175	0.0717	0.0964	0.0741	0.0823	0.0559	0.103	0.0827	0.0938	0.092	0.089
6661	PE(O-18:0/18:1)	Phosphatidylethanolamine	PE Ether	53513	DMS-MS	100009661			3.537	3.4194	4.3654	4.088	3.7355	3.1846	2.6243	3.5356	3.36	3.5996	1.3304	1.691	1.7219	1.5557	1.4331	2.4673	2.0298	2.5286	2.1375	2.2829
6662	PE(O-18:0/18:2)	Phosphatidylethanolamine	PE Ether	54368	DMS-MS	100010516			0.3621	0.3275	0.4281	0.3832	0.3239	0.17	0.1593	0.2159	0.2761	0.1952	0.0846	0.1568	0.1291	0.096	0.1202	0.1433	0.1912	0.1747	0.1872	0.1788
6665	PE(O-18:0/20:1)	Phosphatidylethanolamine	PE Ether	53514	DMS-MS	100009662			0.7881	0.7702	0.8948	0.7757	0.7063	0.8656	0.7243	1.0306	1.0023	1.1874	0.1158	0.1427	0.1796	0.1623	0.1371	0.4394	0.3401	0.3925	0.3866	0.3951
6666	PE(O-18:0/20:2)	Phosphatidylethanolamine	PE Ether	53515	DMS-MS	100009663			0.4509	0.4083	0.6608	0.4849	0.4646	0.4905	0.4377	0.5757	0.5495	0.4184	0.0985	0.1402	0.1359	0.1419	0.1058	0.3538	0.2604	0.3379	0.3247	0.3449
6667	PE(O-18:0/20:3)	Phosphatidylethanolamine	PE Ether	53335	DMS-MS	100009483			0.5537	0.4879	0.7505	0.6804	0.5054	0.5575	0.5709	0.7771	0.5721	0.6149	0.2877	0.3451	0.3472	0.2937	0.2489	0.7715	0.7091	0.8209	0.7643	0.916
6668	PE(O-18:0/20:4)	Phosphatidylethanolamine	PE Ether	54203	DMS-MS	100010351			3.3552	3.2554	4.5936	4.2597	3.475	2.5629	2.2838	3.3054	2.5568	2.3848	1.4733	2.0733	1.9952	1.8465	1.7794	2.5494	2.5484	2.6226	2.7539	3.1099
6669	PE(O-18:0/20:5)	Phosphatidylethanolamine	PE Ether	54204	DMS-MS	100010352			0.5571	0.5767	0.6647	0.6173	0.483	0.3474	0.3314	0.5048	0.4451	0.4356	0.222	0.2205	0.2053		0.2633	0.3738	0.3041	0.3871	0.355	0.542
6670	PE(O-18:0/22:1)	Phosphatidylethanolamine	PE Ether	54559	DMS-MS	100010707			0.22	0.1998	0.2907	0.2813	0.2346	0.3021	0.3521	0.3781	0.4474	0.4501	0.0428		0.0385		0.0546	0.145	0.0897	0.1152	0.1158	0.1314
6671	PE(O-18:0/22:2)	Phosphatidylethanolamine	PE Ether	54560	DMS-MS	100010708			0.1513	0.1787	0.1978	0.1936	0.1532	0.2088	0.2026	0.262	0.303	0.2468	0.0735	0.1197	0.1276	0.1136	0.0736	0.2523	0.2347	0.3086	0.3103	0.3589
6672	PE(O-18:0/22:4)	Phosphatidylethanolamine	PE Ether	54019	DMS-MS	100010167			1.884	2.0549	2.672	2.6748	2.1277	0.9722	0.8902	0.9772	1.1898	0.992	1.1045	1.4529	1.5085	1.351	1.1719	1.5758	1.7238	1.6467	1.6412	1.6777
6673	PE(O-18:0/22:5)	Phosphatidylethanolamine	PE Ether	54370	DMS-MS	100010518			2.8012	2.8011	3.6986	3.0601	2.8346	1.597	1.5294	1.7973	1.6707	1.655	2.7743	3.5277	3.3454	2.8961	2.5228	3.7774	3.6045	3.6918	3.6947	4.1079
6674	PE(O-18:0/22:6)	Phosphatidylethanolamine	PE Ether	54371	DMS-MS	100010519			2.993	3.4111	3.4235	3.8473	2.7877	2.3391	1.6987	2.7359	2.2415	2.0191	1.6216	2.7247	2.3715	2.5103	1.6941	2.938	2.8111	3.0413	2.9592	2.9878
6676	PE(P-14:0/18:1)	Phosphatidylethanolamine	PE Plasmalogen	54372	DMS-MS	100010520		HMDB11434	0.1176	0.1229	0.0734	0.1077	0.0827	0.1014	0.1068	0.1245	0.0866	0.0924		0.0626			0.0381	0.0648	0.0541	0.0891	0.0699
6679	PE(P-16:0/16:0)	Phosphatidylethanolamine	PE Plasmalogen	54373	DMS-MS	100010521			1.4985	1.3724	1.7097	1.5161	1.4075	0.3463	0.2582	0.3598	0.3704	0.3367	0.1997	0.2911	0.2676	0.2645	0.186	0.3159	0.2998	0.3934	0.3845	0.3886
6680	PE(P-16:0/16:1)	Phosphatidylethanolamine	PE Plasmalogen	54374	DMS-MS	100010522		HMDB11339	1.288	1.1562	1.4852	1.3761	1.3359	1.3674	1.3189	1.4891	1.6037	1.6716	0.4863	0.6267	0.6872	0.5675	0.5151	0.9418	0.8104	1.0532	0.9819	1.1279
6681	PE(P-16:0/18:0)	Phosphatidylethanolamine	PE Plasmalogen	54375	DMS-MS	100010523		HMDB11340	0.467	0.3967	0.3901	0.3885	0.3813	0.515	0.4493	0.5574	0.5231	0.5392	0.0925	0.1361	0.1556	0.2	0.1063	0.1783	0.1628	0.2115	0.1802	0.1835
6682	PE(P-16:0/18:1)	Phosphatidylethanolamine	PE Plasmalogen	53336	DMS-MS	100009484		HMDB11342	13.0764	12.4395	14.4955	14.0663	12.6344	16.4977	15.3682	18.4416	18.6865	20.1745	3.7111	4.5702	5.0119	4.922	3.7783	6.2003	5.5531	6.8413	6.4506	6.902
6683	PE(P-16:0/18:2)	Phosphatidylethanolamine	PE Plasmalogen	54561	DMS-MS	100010709		HMDB11343	0.971	0.984	1.1633	1.1711	1.0003	1.0037	0.8836	1.2234	1.1656	0.9371	0.1608	0.2608	0.2665	0.2525	0.1884	0.3001	0.3201	0.4081	0.3439	0.4132
6684	PE(P-16:0/18:3)	Phosphatidylethanolamine	PE Plasmalogen	53854	DMS-MS	100010002		HMDB11345	0.1726	0.1441	0.1662	0.2323	0.1851	0.2472	0.1837	0.2004	0.2523	0.2174								0.0885
6686	PE(P-16:0/20:1)	Phosphatidylethanolamine	PE Plasmalogen	53520	DMS-MS	100009668		HMDB11348	4.2933	4.1558	4.5958	4.5361	4.586	7.0254	6.8961	8.397	8.5985	8.9488	0.662	0.8337	0.8561	0.8199	0.63	1.7223	1.5509	1.8363	1.741	1.7716
6687	PE(P-16:0/20:2)	Phosphatidylethanolamine	PE Plasmalogen	54376	DMS-MS	100010524		HMDB11349	2.6946	2.2587	2.3917	2.655	2.6034	3.6215	3.1756	4.2017	4.2139	3.9089	0.366	0.5757	0.4702	0.4474	0.3049	1.1793	1.1312	1.3071	1.3405	1.4901
6688	PE(P-16:0/20:3)	Phosphatidylethanolamine	PE Plasmalogen	53855	DMS-MS	100010003		HMDB11351	2.5325	2.5104	2.8155	2.7805	2.6657	4.3696	3.8611	4.7049	4.6151	4.5173	0.6395	0.8858	0.9202	0.7654	0.669	2.2853	2.2036	2.7641	2.6232	2.8044
6689	PE(P-16:0/20:4)	Phosphatidylethanolamine	PE Plasmalogen	54020	DMS-MS	100010168		HMDB11353	17.0957	15.3182	19.8674	19.3048	16.2897	17.8007	16.4561	21.1173	18.1125	17.6881	4.5414	6.7399	6.5413	6.7134	4.9669	9.462	9.8412	10.6313	10.6885	12.189
6690	PE(P-16:0/20:5)	Phosphatidylethanolamine	PE Plasmalogen	54562	DMS-MS	100010710		HMDB11354	1.8432	1.9541	2.446	2.0761	1.9084	2.04	2.1514	2.5307	2.2383	2.2869	0.5812	0.729	0.6416	0.6464	0.5211	1.2185	1.1102	1.2777	1.3063	1.4396
6691	PE(P-16:0/22:1)	Phosphatidylethanolamine	PE Plasmalogen	53856	DMS-MS	100010004			1.0245	0.8493	0.9957	0.9389	1.033	2.0885	1.8509	2.2685	2.4254	2.4034	0.0966	0.121	0.1182	0.1253	0.0605	0.3811	0.3544	0.3745	0.3976	0.3745
6692	PE(P-16:0/22:2)	Phosphatidylethanolamine	PE Plasmalogen	54205	DMS-MS	100010353		HMDB11357	1.1307	0.9216	1.1447	1.1515	1.0065	1.593	1.5615	1.8822	2.115	1.8143	0.3312	0.5064	0.5921	0.5982	0.3974	1.1883	1.2329	1.353	1.3085	1.4831
6693	PE(P-16:0/22:4)	Phosphatidylethanolamine	PE Plasmalogen	54206	DMS-MS	100010354		HMDB11358	13.7187	13.5429	17.1089	17.5704	14.7449	9.5216	8.7997	12.1124	11.0466	10.0797	5.4007	7.492	7.1571	7.6906	6.2662	7.4686	8.2372	8.1116	7.8303	8.9248
6694	PE(P-16:0/22:5)	Phosphatidylethanolamine	PE Plasmalogen	53521	DMS-MS	100009669		HMDB11360	18.4685	18.2589	21.0488	17.5686	18.4577	14.7506	12.6322	16.197	15.811	15.5536	12.7752	16.8278	17.7899	13.9665	12.3387	16.875	16.0812	19.5873	17.53	18.3065
6695	PE(P-16:0/22:6)	Phosphatidylethanolamine	PE Plasmalogen	53679	DMS-MS	100009827			17.3474	18.1291	16.8638	18.4613	16.9889	17.7576	14.0207	20.6212	18.7227	17.3038	12.4314	17.8426	18.8891	16.1085	12.8127	18.6555	17.6718	23.4946	19.8479	18.074
6696	PE(P-16:1/18:1)	Phosphatidylethanolamine	PE Plasmalogen	54207	DMS-MS	100010355			0.2353	0.1998	0.2229	0.2119	0.2201	0.1908	0.1989	0.2525	0.2336	0.2157	0.0485	0.1061	0.0948	0.0651	0.0532	0.095	0.0948	0.1125	0.1046	0.1129
6698	PE(P-18:0/16:0)	Phosphatidylethanolamine	PE Plasmalogen	53337	DMS-MS	100009485		HMDB11371	2.349	2.5817	2.7626	2.6218	2.4687	1.1082	0.988	1.2733	1.2665	1.3205	0.6786	0.8318	0.8943	0.7767	0.6411	1.3172	1.1524	1.4637	1.2582	1.3635
6699	PE(P-18:0/16:1)	Phosphatidylethanolamine	PE Plasmalogen	53857	DMS-MS	100010005		HMDB11372	1.4127	1.493	1.5576	1.5843	1.4161	1.1953	1.1937	1.5355	1.3966	1.5494	0.5621	0.8498	0.8401	0.7682	0.6231	1.165	1.115	1.3043	1.2003	1.3418
6700	PE(P-18:0/18:0)	Phosphatidylethanolamine	PE Plasmalogen	53522	DMS-MS	100009670			0.6093	0.5742	0.6266	0.5943	0.5732	0.5492	0.5108	0.5732	0.5549	0.6041	0.184	0.2429	0.2667	0.2272	0.1817	0.2771	0.3008	0.3151	0.3233	0.3441
6701	PE(P-18:0/18:1)	Phosphatidylethanolamine	PE Plasmalogen	53338	DMS-MS	100009486		HMDB11375	13.1129	11.981	13.6866	13.2224	12.8426	13.506	13.0144	15.1426	14.4184	16.477	4.5561	6.0154	6.0973	5.7299	4.7194	8.1972	7.0417	8.4319	8.1326	8.9222
6702	PE(P-18:0/18:2)	Phosphatidylethanolamine	PE Plasmalogen	54377	DMS-MS	100010525		HMDB11376	1.2514	1.0138	1.1377	1.0831	1.014	0.8596	0.7322	0.9005	0.9494	0.8897	0.2424	0.3996	0.3576	0.4067	0.2923	0.4658	0.5398	0.5458	0.5711	0.6514
6703	PE(P-18:0/18:3)	Phosphatidylethanolamine	PE Plasmalogen	53523	DMS-MS	100009671		HMDB11378	0.2209	0.1335	0.1776	0.2541	0.1638	0.1967	0.2195	0.1474	0.1954	0.1994								0.1161		0.0882
6705	PE(P-18:0/20:1)	Phosphatidylethanolamine	PE Plasmalogen	53339	DMS-MS	100009487		HMDB11381	2.6795	2.3588	2.7069	2.7947	2.5719	3.8077	3.5967	4.4333	4.3145	4.7187	0.4151	0.5775	0.6196	0.5506	0.4397	1.1902	0.9656	1.1297	1.1381	1.1952
6706	PE(P-18:0/20:2)	Phosphatidylethanolamine	PE Plasmalogen	53340	DMS-MS	100009488		HMDB11382	1.9828	1.6291	2.0148	2.0626	1.8348	2.3927	2.0798	2.7495	2.715	2.4851	0.3144	0.4772	0.4524	0.4474	0.3665	1.0853	0.982	1.2038	1.0573	1.2152
6707	PE(P-18:0/20:3)	Phosphatidylethanolamine	PE Plasmalogen	54564	DMS-MS	100010712		HMDB11384	2.4496	2.3922	2.953	2.6176	2.5544	3.6281	3.4271	3.8663	3.91	3.6152	1.0477	1.2678	1.1902	1.1407	1.0787	2.945	2.8418	3.583	3.2183	3.5498
6708	PE(P-18:0/20:4)	Phosphatidylethanolamine	PE Plasmalogen	53524	DMS-MS	100009672		HMDB11386	15.641	15.9506	17.8359	19.7234	16.4571	15.5805	14.5335	17.7523	15.5209	15.6244	6.6507	8.7396	9.2346	8.7759	6.6694	11.9895	12.0643	13.6922	13.2291	14.6309
6709	PE(P-18:0/20:5)	Phosphatidylethanolamine	PE Plasmalogen	54208	DMS-MS	100010356		HMDB11387	2.0243	2.4313	2.5066	2.7153	2.3954	2.3	1.7588	2.6116	2.4983	2.1317	0.8225	1.0505	1.0599	0.8446	0.8024	1.8692	1.5022	1.6974	1.5647	2.2353
6710	PE(P-18:0/22:1)	Phosphatidylethanolamine	PE Plasmalogen	53858	DMS-MS	100010006			0.7916	0.663	0.8481	0.8658	0.6978	1.385	1.2406	1.494	1.5718	1.7035	0.1151	0.0955	0.0898	0.1273	0.078	0.3067	0.2922	0.3061	0.355	0.3289
6711	PE(P-18:0/22:2)	Phosphatidylethanolamine	PE Plasmalogen	53525	DMS-MS	100009673		HMDB11390	0.6728	0.6806	0.8515	0.9013	0.6951	1.0393	0.9823	1.0979	1.206	1.2119	0.2868	0.4051	0.4346	0.461	0.2992	0.9718	0.9291	1.1158	1.1037	1.0838
6712	PE(P-18:0/22:4)	Phosphatidylethanolamine	PE Plasmalogen	53680	DMS-MS	100009828		HMDB11391	11.3753	11.1574	13.7256	14.8624	12.5264	6.9504	6.5159	7.5628	7.588	7.201	4.8505	6.8113	6.7266	7.0678	5.2369	6.1065	6.0412	6.3353	6.2376	6.6449
6713	PE(P-18:0/22:5)	Phosphatidylethanolamine	PE Plasmalogen	53681	DMS-MS	100009829		HMDB11393	17.1969	17.8563	20.7868	17.6924	18.5846	12.0346	11.0248	12.5189	12.7358	12.6983	12.9193	17.0853	17.1358	13.8028	12.3522	16.0839	15.2866	17.9348	16.4499	17.4846
6714	PE(P-18:0/22:6)	Phosphatidylethanolamine	PE Plasmalogen	54209	DMS-MS	100010357		HMDB11394	17.1692	20.1167	18.7253	19.2134	18.5541	16.4288	14.0111	18.3238	17.511	16.9043	12.8341	20.5092	19.5225	16.9001	13.6204	18.7665	18.5247	21.6775	19.4932	18.6448
6716	PE(P-18:1/16:0)	Phosphatidylethanolamine	PE Plasmalogen	54565	DMS-MS	100010713		HMDB11437	2.9112	3.0286	3.3621	3.2137	3.1853	1.7875	1.6676	1.9294	2.1347	2.0523	0.6046	0.8989	0.9361	0.8933	0.7697	1.1009	1.0451	1.2278	1.1151	1.2462
6717	PE(P-18:1/16:1)	Phosphatidylethanolamine	PE Plasmalogen	53341	DMS-MS	100009489		HMDB11438	1.4515	1.2826	1.422	1.4041	1.4433	1.2692	1.2138	1.5123	1.6594	1.5945	0.8432	1.1749	1.1405	1.1253	0.8717	1.7624	1.5911	2.0281	1.883	2.0962
6718	PE(P-18:1/18:0)	Phosphatidylethanolamine	PE Plasmalogen	54566	DMS-MS	100010714		HMDB11439	0.4105	0.3494	0.4203	0.4067	0.389	0.4201	0.3923	0.4915	0.5058	0.5128	0.184	0.2306	0.2649	0.2556	0.186	0.3616	0.2845	0.3547	0.3156	0.3517
6719	PE(P-18:1/18:1)	Phosphatidylethanolamine	PE Plasmalogen	54210	DMS-MS	100010358		HMDB11441	10.3322	9.796	10.7567	10.3972	11.0213	12.5312	11.852	13.9425	14.364	16.9238	6.0641	8.1375	8.6664	7.8591	6.3506	11.9314	10.6301	12.8652	11.7904	11.9607
6720	PE(P-18:1/18:2)	Phosphatidylethanolamine	PE Plasmalogen	54211	DMS-MS	100010359		HMDB11442	0.7757	0.8918	1.019	0.9091	0.8321	0.7269	0.6302	0.775	0.7939	0.7196	0.2664	0.523	0.4251	0.4186	0.2992	0.6583	0.533	0.6937	0.7134	0.7196
6721	PE(P-18:1/18:3)	Phosphatidylethanolamine	PE Plasmalogen	54379	DMS-MS	100010527		HMDB11444	0.1211	0.0916	0.1228	0.1346	0.0864	0.1088	0.1162	0.1275	0.1803	0.1299						0.1025	0.1139	0.1371	0.0955	0.0833
6723	PE(P-18:1/20:1)	Phosphatidylethanolamine	PE Plasmalogen	54212	DMS-MS	100010360		HMDB11447	1.7009	1.6677	1.9176	1.7938	1.8212	2.974	2.7406	3.26	3.5512	3.9253	0.4789	0.6144	0.6738	0.5927	0.4474	1.3492	1.1447	1.4448	1.2899	1.3591
6724	PE(P-18:1/20:2)	Phosphatidylethanolamine	PE Plasmalogen	53342	DMS-MS	100009490		HMDB11448	1.1946	1.2094	1.275	1.2845	1.1834	1.6853	1.6849	1.9412	2.1675	1.785	0.3528	0.4883	0.5294	0.4474	0.3231	1.1689	1.0973	1.3913	1.2877	1.5181
6725	PE(P-18:1/20:3)	Phosphatidylethanolamine	PE Plasmalogen	53682	DMS-MS	100009830		HMDB11450	1.6457	1.6574	1.7565	1.652	1.6652	2.1986	2.3299	2.3254	2.8739	2.6539	0.8696	1.1619	1.1648	0.9872	0.92	2.9779	3.0622	3.943	3.6535	3.823
6726	PE(P-18:1/20:4)	Phosphatidylethanolamine	PE Plasmalogen	53859	DMS-MS	100010007		HMDB11451	10.4975	11.1219	12.4053	12.8056	11.2034	9.5634	9.8207	11.3175	10.3568	10.0531	5.0817	6.8805	6.7491	6.8463	5.1975	10.8872	12.0914	13.0689	12.7345	13.601
6727	PE(P-18:1/20:5)	Phosphatidylethanolamine	PE Plasmalogen	54380	DMS-MS	100010528		HMDB11420	1.3464	1.394	1.8705	1.6421	1.4491	1.24	1.1522	1.6698	1.4413	1.4538	0.39	0.733	0.5064	0.5818	0.4539	1.3108	1.1886	1.5229	1.3251	1.7956
6728	PE(P-18:1/22:1)	Phosphatidylethanolamine	PE Plasmalogen	54213	DMS-MS	100010361		HMDB11455	0.5128	0.5694	0.5814	0.576	0.6364	1.2174	1.111	1.3757	1.4112	1.4955	0.0876	0.1491	0.1147	0.1315	0.066	0.333	0.2692	0.3178	0.3004	0.3897
6729	PE(P-18:1/22:2)	Phosphatidylethanolamine	PE Plasmalogen	53683	DMS-MS	100009831		HMDB11423	0.4722	0.4736	0.584	0.6237	0.4908	0.939	0.77	0.9725	1.0626	0.9148	0.2352	0.3205	0.3233	0.322	0.2409	0.8166	0.8179	0.9373	0.8958	1.0663
6730	PE(P-18:1/22:4)	Phosphatidylethanolamine	PE Plasmalogen	54567	DMS-MS	100010715		HMDB11424	8.1787	8.3193	10.307	9.772	8.7711	4.5881	4.7184	5.0586	4.8445	4.5372	2.8449	3.8007	3.2679	3.7457	2.76	4.4311	4.2948	4.5094	4.7588	4.8533
6731	PE(P-18:1/22:5)	Phosphatidylethanolamine	PE Plasmalogen	53343	DMS-MS	100009491		HMDB11459	9.6398	9.6316	10.2098	8.8689	9.5101	5.6484	5.1824	6.4811	6.4817	6.5315	6.3074	8.3316	8.5066	6.9208	6.1949	9.8459	9.8376	11.2833	10.3324	11.3219
6732	PE(P-18:1/22:6)	Phosphatidylethanolamine	PE Plasmalogen	54022	DMS-MS	100010170		HMDB11460	11.9665	13.6901	12.1386	13.266	12.7122	11.5748	9.5053	12.8458	12.5321	12.428	8.1412	12.4648	12.4457	10.898	8.0843	15.2496	14.2776	18.6276	16.5289	16.1865
6734	PE(P-18:2/20:4)	Phosphatidylethanolamine	PE Plasmalogen	54215	DMS-MS	100010363			0.2413	0.2506	0.3668	0.3507	0.2569	0.1888	0.1365	0.2661	0.1899	0.2005		0.1537	0.0998	0.1846		0.1894	0.1926	0.2528	0.1401	0.2504
6735	PE(P-18:2/22:6)	Phosphatidylethanolamine	PE Plasmalogen	54023	DMS-MS	100010171				0.282			0.2158							0.2732	0.2404		0.1787		0.2992	0.3128		0.3171
7016	PI(16:0/18:1)	Phosphatidylinositol	PI Ester	53344	DMS-MS	100009492		HMDB09783	0.5434	0.3938	0.4715	0.4749	0.412	0.3793	0.408	0.5988	0.3823	0.3731	0.2829	0.4395	0.3885	0.3691	0.2443	0.3914	0.3295	0.4699	0.4576	0.4375
7017	PI(16:0/18:2)	Phosphatidylinositol	PI Ester	54382	DMS-MS	100010530		HMDB09784	0.0966	0.0945	0.1832	0.1104	0.0681	0.1417	0.1123	0.1826	0.126	0.0941										0.0722
7022	PI(16:0/20:3)	Phosphatidylinositol	PI Ester	53860	DMS-MS	100010008		HMDB09788	0.3415	0.2561	0.3026	0.2851	0.2246	0.3914	0.4383	0.7376	0.3459	0.3894	0.135	0.2094	0.1637	0.1424	0.0923	0.1822	0.1429	0.231	0.2425	0.2476
7023	PI(16:0/20:4)	Phosphatidylinositol	PI Ester	53861	DMS-MS	100010009		HMDB09789	0.7438	0.5104	0.778	0.6645	0.4941	0.5376	0.5205	0.7949	0.4715	0.4916	0.2552	0.3727	0.262	0.3045	0.1539	0.299	0.2124	0.2859	0.3055	0.3011
7027	PI(16:0/22:4)	Phosphatidylinositol	PI Ester	54383	DMS-MS	100010531		HMDB09794								0.172		0.1506
7028	PI(16:0/22:5)	Phosphatidylinositol	PI Ester	53527	DMS-MS	100009675		HMDB09796								0.0805
7048	PI(18:0/16:0)	Phosphatidylinositol	PI Ester	53345	DMS-MS	100009493	C13888	HMDB09805	1.0516	0.8947	1.1719	1.1203	0.9085	0.955	1.1177	1.5989	1.2227	1.2677	0.3957	0.6068	0.4703	0.4737	0.354	0.6111	0.5307	0.7372	0.6007	0.7078
7049	PI(18:0/16:1)	Phosphatidylinositol	PI Ester	54569	DMS-MS	100010717		HMDB09806	0.0664	0.0502			0.0614							0.0788	0.0515	0.0665	0.0514		0.0462	0.0858
7052	PI(18:0/18:1)	Phosphatidylinositol	PI Ester	53684	DMS-MS	100009832			1.5362	1.0993	1.3768	1.2445	1.1908	0.8579	1.1255	1.5416	0.8257	1.0696	1.0669	1.7137	1.4259	1.4788	0.9086	1.4671	1.2022	1.7994	1.658	1.9301
7053	PI(18:0/18:2)	Phosphatidylinositol	PI Ester	54218	DMS-MS	100010366		HMDB09809	0.9124	0.6437	0.8841	0.8133	0.6888	0.8289	1.0843	1.5999	0.8444	0.9134	0.2496	0.4287	0.3482	0.3051	0.1827	0.2508	0.2035	0.3826	0.3631	0.3712
7054	PI(18:0/18:3)	Phosphatidylinositol	PI Ester	54024	DMS-MS	100010172		HMDB09811	0.2145	0.147	0.233	0.2087	0.1566	0.2607	0.281	0.4363	0.2569	0.2225		0.0895						0.0869
7057	PI(18:0/20:2)	Phosphatidylinositol	PI Ester	53528	DMS-MS	100009676		HMDB09812	1.7982	1.2123	1.6333	1.5934	1.2033	3.3074	3.6659	6.0414	3.5675	3.1461	0.7921	1.3998	1.1582	1.2151	0.8073	1.5406	1.2519	1.9397	2.0491	2.4618
7058	PI(18:0/20:3)	Phosphatidylinositol	PI Ester	54025	DMS-MS	100010173		HMDB09814	5.7987	3.9151	5.5209	4.6709	3.7264	6.1549	7.4987	10.74	7.0583	5.8541	3.016	5.2529	3.5622	3.3016	2.8078	4.1576	3.4451	5.8442	5.9516	6.3927
7059	PI(18:0/20:4)	Phosphatidylinositol	PI Ester	54026	DMS-MS	100010174		HMDB09815	16.8004	12.2936	16.2837	15.7728	11.2881	9.6386	10.9385	16.5489	9.8505	8.8972	5.6319	9.9358	7.0935	6.6497	4.83	6.3347	5.7588	7.2673	8.0073	8.5376
7060	PI(18:0/20:5)	Phosphatidylinositol	PI Ester	53529	DMS-MS	100009677			0.9518	0.7012	1.0283	0.8211	0.8354	0.7	0.7889	1.248	0.6048	0.6534	0.2271	0.2582	0.2097			0.2769	0.2185	0.2346	0.3206	0.2683
7062	PI(18:0/22:4)	Phosphatidylinositol	PI Ester	53685	DMS-MS	100009833		HMDB09818	0.8778	0.5969	0.9352	0.8971	0.6151	0.6546	0.7708	1.1594	0.6012	0.5337	0.4127	0.7566	0.6139	0.7032	0.3919	0.4006	0.4044	0.4879	0.4945	0.5946
7063	PI(18:0/22:5)	Phosphatidylinositol	PI Ester	54384	DMS-MS	100010532		HMDB09820	0.4311	0.3679	0.3647	0.3313	0.295	0.3585	0.4348	0.5417	0.2947	0.3735	0.1555	0.2687	0.2143	0.1668	0.1425	0.1532	0.1426	0.1608	0.2247	0.2295
7064	PI(18:0/22:6)	Phosphatidylinositol	PI Ester	54219	DMS-MS	100010367		HMDB09821							0.1875	0.3706
7066	PI(18:1/16:1)	Phosphatidylinositol	PI Ester	54220	DMS-MS	100010368		HMDB09835	0.1764	0.1463	0.1732	0.1693	0.1305	0.1158	0.1677	0.2451	0.1367	0.1486	0.0944	0.121	0.1076	0.081	0.0534	0.1202	0.122	0.1404	0.1481	0.1335
7067	PI(18:1/18:1)	Phosphatidylinositol	PI Ester	53346	DMS-MS	100009494		HMDB09837	4.6203	3.8894	4.8504	4.0551	3.5597	4.2388	5.2129	7.5884	4.2574	5.4824	1.8833	3.2024	2.4748	2.2927	1.4537	3.1997	2.3163	3.706	3.399	3.5715
7068	PI(18:1/18:2)	Phosphatidylinositol	PI Ester	53530	DMS-MS	100009678		HMDB09838	0.4615	0.3531	0.47	0.4223	0.2703	0.544	0.6647	0.9374	0.4707	0.5773	0.0813	0.136	0.1047	0.1097	0.0756	0.1597	0.1145	0.1772	0.1936	0.1926
7073	PI(18:1/20:3)	Phosphatidylinositol	PI Ester	54027	DMS-MS	100010175		HMDB09843	0.9472	0.7916	1.004	0.8298	0.7504	1.6122	2.1281	2.7102	1.8461	1.925	0.406	0.6696	0.4827	0.3437	0.2904	0.6767	0.5455	0.7548	0.8324	0.8737
7074	PI(18:1/20:4)	Phosphatidylinositol	PI Ester	54221	DMS-MS	100010369		HMDB09844	2.4583	1.7442	2.507	2.6714	1.6921	2.0837	2.6251	3.7421	2.1486	1.973	0.7556	1.3324	0.9077	0.8831	0.5025	0.9858	0.8156	0.932	1.1079	1.0501
7522	SM(14:0)	Sphingolipids	Sphingomyelin	54222	DMS-MS	100010370		HMDB12097	2.3382	2.2692	2.5601	2.5591	2.4244	2.0888	1.923	2.5251	2.3047	2.1413	1.1338	1.4643	1.3738	1.293	1.0762	1.5608	1.4652	1.6148	1.5562	1.7228
7523	SM(16:0)	Sphingolipids	Sphingomyelin	54385	DMS-MS	100010533		HMDB10169	96.939	93.6176	101.07	103.724	100.347	91.3377	85.2217	105.672	99.4619	92.002	36.1638	50.3019	46.0993	44.8843	38.4744	65.2194	59.2019	66.1733	62.4728	68.767
7524	SM(18:0)	Sphingolipids	Sphingomyelin	54386	DMS-MS	100010534		HMDB01348	5.4304	5.4763	5.9003	6.0551	5.7499	3.1048	2.8045	3.4003	3.301	3.1142	2.4225	3.4129	3.0616	2.8352	2.4431	3.1431	2.8776	3.2267	3.0146	3.2911
7525	SM(18:1)	Sphingolipids	Sphingomyelin	53862	DMS-MS	100010010		HMDB12101	0.681	0.65	0.7344	0.7641	0.7077	0.5034	0.4652	0.5613	0.5334	0.5148	0.3978	0.6051	0.5252	0.4966	0.4082	0.4637	0.3879	0.4769	0.4506	0.4677
7526	SM(20:0)	Sphingolipids	Sphingomyelin	53687	DMS-MS	100009835		HMDB12102	2.6241	2.8006	2.9448	2.6122	2.9225	2.1021	1.8885	2.5109	2.6793	2.7282	2.2945	2.7601	2.8105	2.5083	2.1556	3.2712	3.0731	3.1722	2.905	3.2732
7527	SM(20:1)	Sphingolipids	Sphingomyelin	53531	DMS-MS	100009679			0.2988	0.2864	0.3161	0.3183	0.3053	0.1597	0.1507	0.2069	0.1974	0.1896	0.2316	0.3249	0.3049	0.2608	0.236	0.2938	0.2833	0.3032	0.291	0.2796
7528	SM(22:0)	Sphingolipids	Sphingomyelin	53347	DMS-MS	100009495		HMDB12103	15.8255	15.9148	17.4768	16.1379	17.4836	17.0047	15.3301	19.3984	21.01	19.9824	13.6515	16.6452	16.5492	15.7175	13.3809	17.5494	16.7145	16.9821	16.6764	18.5786
7529	SM(22:1)	Sphingolipids	Sphingomyelin	54570	DMS-MS	100010718		HMDB12104	3.6982	3.6424	3.8826	3.9642	3.8969	3.1821	2.877	3.7219	3.8217	3.5896	2.7146	3.3957	3.1415	2.8599	2.5377	3.4974	3.2581	3.3101	3.2822	3.3847
7530	SM(24:0)	Sphingolipids	Sphingomyelin	53863	DMS-MS	100010011		HMDB11697	12.7998	12.5826	13.4682	13.0718	13.5929	18.8432	17.6095	22.2099	21.0259	19.8031	12.0623	14.7528	15.0034	13.6411	11.8089	13.0308	12.1196	12.705	12.2725	13.3159
7531	SM(24:1)	Sphingolipids	Sphingomyelin	54028	DMS-MS	100010176		HMDB12107	22.3554	21.336	23.6593	24.896	23.5551	25.097	24.0277	29.9613	29.1204	27.4728	13.1415	17.7698	17.1086	15.1383	13.6019	17.1727	15.9629	17.1832	17.2264	17.2556
7532	SM(26:0)	Sphingolipids	Sphingomyelin	54387	DMS-MS	100010535		HMDB11698	0.3836	0.3899	0.413	0.3836	0.4109	0.78	0.7128	0.9139	1.0189	0.9734	0.4961	0.5771	0.6376	0.6092	0.5122	0.5156	0.4986	0.5274	0.5018	0.5602
7533	SM(26:1)	Sphingolipids	Sphingomyelin	53348	DMS-MS	100009496			0.4704	0.4566	0.5069	0.5166	0.4852	0.6539	0.6156	0.7678	0.7844	0.7457	0.3525	0.428	0.433	0.3945	0.3721	0.4327	0.4328	0.4121	0.4131	0.4053
7915	TAG36:0-FA12:0	Triacylglycerol	TAG Ester	54388	DMS-MS	100010536			0.0287			0.0227			0.0382	0.0226	0.0312	0.0311	0.0183		0.018		0.0453			0.0252		0.0248
7916	TAG38:0-FA12:0	Triacylglycerol	TAG Ester	53532	DMS-MS	100009680			0.0118
7945	TAG42:0-FA12:0	Triacylglycerol	TAG Ester	53533	DMS-MS	100009681																					0.0121
7947	TAG42:0-FA14:0	Triacylglycerol	TAG Ester	54029	DMS-MS	100010177				0.0173																	0.0233	0.0219
7985	TAG44:0-FA12:0	Triacylglycerol	TAG Ester	53693	DMS-MS	100009841						0.018													0.0331	0.023	0.0237	0.0216
7987	TAG44:0-FA14:0	Triacylglycerol	TAG Ester	54389	DMS-MS	100010537			0.0517	0.05	0.0557	0.0513	0.0891	0.026	0.0155				0.0517	0.0667	0.0629	0.0661	0.0926	0.133	0.1072	0.12	0.1072	0.1116
7989	TAG44:0-FA16:0	Triacylglycerol	TAG Ester	54031	DMS-MS	100010179			0.0329	0.035	0.0415	0.0357	0.0653		0.0188				0.0329	0.0431	0.0526	0.0501	0.0711	0.0752	0.0842	0.0836	0.0778	0.1072
7991	TAG44:0-FA18:0	Triacylglycerol	TAG Ester	53534	DMS-MS	100009682			0.027	0.0252	0.0323	0.0284	0.0412	0.0307	0.0244	0.0274	0.0409	0.0629	0.033	0.0284	0.0294	0.045	0.1124	0.0451	0.0407	0.0463	0.0301	0.0323
7993	TAG44:1-FA12:0	Triacylglycerol	TAG Ester	54390	DMS-MS	100010538																					0.0249
7995	TAG44:1-FA14:0	Triacylglycerol	TAG Ester	53694	DMS-MS	100009842				0.0276			0.0318							0.0345	0.0247	0.0298		0.041	0.0414	0.0502	0.0388	0.0425
7998	TAG44:1-FA16:0	Triacylglycerol	TAG Ester	53864	DMS-MS	100010012						0.0173														0.0226	0.0275	0.0207
7999	TAG44:1-FA16:1	Triacylglycerol	TAG Ester	54571	DMS-MS	100010719			0.0133											0.0206	0.0217					0.0302	0.0328	0.026
8001	TAG44:1-FA18:1	Triacylglycerol	TAG Ester	53695	DMS-MS	100009843					0.0216	0.0164	0.0191								0.0161				0.0322		0.0154	0.0243
8027	TAG45:0-FA14:0	Triacylglycerol	TAG Ester	54392	DMS-MS	100010540			0.0888	0.0899	0.0881	0.1048	0.1337	0.0315	0.0233	0.0355			0.0855	0.1347	0.1421	0.1371	0.1619	0.1902	0.1686	0.2242	0.1721	0.2236
8028	TAG45:0-FA15:0	Triacylglycerol	TAG Ester	53865	DMS-MS	100010013			0.0275	0.0219	0.0279	0.0291	0.036						0.0265	0.0326	0.0293	0.043	0.0425	0.0471	0.0501	0.0544	0.0442	0.0501
8029	TAG45:0-FA16:0	Triacylglycerol	TAG Ester	54572	DMS-MS	100010720			0.0641	0.0682	0.0594	0.0666	0.1172	0.0299	0.0258	0.0248	0.0387		0.0791	0.1087	0.1073	0.0992	0.147	0.156	0.1477	0.1938	0.1529	0.1799
8036	TAG45:1-FA15:0	Triacylglycerol	TAG Ester	53536	DMS-MS	100009684														0.0171					0.0322		0.0174
8037	TAG45:1-FA16:0	Triacylglycerol	TAG Ester	54573	DMS-MS	100010721			0.025		0.0259							0.0303	0.0377	0.0254	0.0239	0.0279	0.0618	0.0497	0.0423	0.0419	0.0381	0.0396
8040	TAG45:1-FA18:1	Triacylglycerol	TAG Ester	53537	DMS-MS	100009685																					0.0186
8054	TAG46:0-FA12:0	Triacylglycerol	TAG Ester	53538	DMS-MS	100009686														0.0206	0.0155				0.0323			0.0248
8056	TAG46:0-FA14:0	Triacylglycerol	TAG Ester	54393	DMS-MS	100010541			0.1497	0.1365	0.1607	0.1481	0.243	0.0406	0.048	0.0485		0.0859	0.14	0.1831	0.1919	0.1439	0.1406	0.3692	0.3032	0.3644	0.3105	0.3344
8058	TAG46:0-FA16:0	Triacylglycerol	TAG Ester	53354	DMS-MS	100009502			0.2339	0.2341	0.2588	0.2537	0.3703	0.0741	0.0836	0.0843	0.0794	0.0779	0.2099	0.2959	0.2851	0.2495	0.2798	0.5079	0.4783	0.6083	0.5108	0.5572
8060	TAG46:0-FA18:0	Triacylglycerol	TAG Ester	53539	DMS-MS	100009687			0.0302	0.0217	0.0264	0.0308	0.0391							0.034	0.0321	0.0261		0.0484	0.0426	0.0497	0.0435	0.0429
8062	TAG46:1-FA12:0	Triacylglycerol	TAG Ester	53866	DMS-MS	100010014			0.0233	0.0276	0.0205	0.0273	0.0352						0.0398	0.0327	0.0334	0.0298		0.0497	0.064	0.0579	0.0519	0.0746
8064	TAG46:1-FA14:0	Triacylglycerol	TAG Ester	53696	DMS-MS	100009844			0.1242	0.1207	0.1379	0.1139	0.1952	0.0538	0.0366	0.0372		0.0565	0.1189	0.1798	0.1651	0.1537	0.1839	0.3195	0.2686	0.346	0.2685	0.3494
8065	TAG46:1-FA14:1	Triacylglycerol	TAG Ester	54227	DMS-MS	100010375						0.015													0.0343	0.0316	0.0227
8067	TAG46:1-FA16:0	Triacylglycerol	TAG Ester	53355	DMS-MS	100009503			0.0701	0.0696	0.0777	0.0768	0.0928	0.0236	0.0258	0.0377	0.0463	0.0454	0.0773	0.0912	0.1008	0.0832	0.0927	0.2014	0.1686	0.2083	0.1688	0.1791
8068	TAG46:1-FA16:1	Triacylglycerol	TAG Ester	53540	DMS-MS	100009688			0.0754	0.0622	0.0839	0.0728	0.0992	0.0224	0.0297	0.0376			0.0782	0.0828	0.0812	0.0797	0.0902	0.1535	0.1477	0.1595	0.1395	0.1747
8071	TAG46:1-FA18:1	Triacylglycerol	TAG Ester	54394	DMS-MS	100010542			0.048	0.0549	0.064	0.0553	0.1049	0.0268	0.0341	0.0317		0.0426	0.07	0.0741	0.0788	0.069	0.0707	0.1181	0.1314	0.1329	0.1167	0.1431
8077	TAG46:2-FA14:0	Triacylglycerol	TAG Ester	54036	DMS-MS	100010184			0.0196			0.02							0.02	0.0209	0.0206	0.0249			0.0378	0.0333	0.0235	0.0328
8078	TAG46:2-FA14:1	Triacylglycerol	TAG Ester	54574	DMS-MS	100010722			0.0197		0.0303		0.0233							0.0198		0.0222	0.049		0.0598	0.0363	0.0222	0.0308
8081	TAG46:2-FA16:1	Triacylglycerol	TAG Ester	53867	DMS-MS	100010015			0.0266	0.0385	0.0302	0.0337	0.0365						0.0409	0.0391	0.0364	0.0463	0.0472	0.0547	0.0523	0.0733	0.0484	0.0566
8083	TAG46:2-FA18:1	Triacylglycerol	TAG Ester	54037	DMS-MS	100010185			0.0248		0.0226	0.0304	0.0437						0.0285	0.0222	0.0239	0.0275	0.0393	0.0435	0.0433	0.0356	0.0252	0.043
8121	TAG47:0-FA14:0	Triacylglycerol	TAG Ester	54228	DMS-MS	100010376			0.1352	0.1288	0.1441	0.1459	0.1894		0.0285	0.0433			0.1409	0.2212	0.2291	0.1678	0.1603	0.2841	0.1934	0.2919	0.2373	0.2879
8122	TAG47:0-FA15:0	Triacylglycerol	TAG Ester	54229	DMS-MS	100010377			0.0584	0.0626	0.0519	0.0662	0.0844	0.0244		0.0317			0.0655	0.0828	0.0884	0.0652	0.0951	0.1262	0.1215	0.1376	0.129	0.1666
8123	TAG47:0-FA16:0	Triacylglycerol	TAG Ester	53697	DMS-MS	100009845			0.3849	0.351	0.3742	0.408	0.4785	0.0973	0.1092	0.111	0.1209	0.107	0.4089	0.6046	0.6442	0.5611	0.5266	0.9188	0.7613	1.0237	0.9245	1.1104
8124	TAG47:0-FA17:0	Triacylglycerol	TAG Ester	53870	DMS-MS	100010018			0.0414	0.0437	0.0598	0.0564	0.067	0.0354	0.0285	0.0327	0.0444		0.0544	0.0579	0.0623	0.0711	0.0857	0.0783	0.0771	0.1007	0.0775	0.0801
8129	TAG47:1-FA14:0	Triacylglycerol	TAG Ester	53871	DMS-MS	100010019			0.2388	0.2474	0.2729	0.3046	0.2881	0.0651	0.0517	0.0664	0.0747	0.0563	0.2433	0.4067	0.4344	0.3739	0.3309	0.5477	0.4457	0.6521	0.5503	0.6887
8131	TAG47:1-FA15:0	Triacylglycerol	TAG Ester	53358	DMS-MS	100009506			0.0541	0.0479	0.0547	0.0626	0.0759		0.0197	0.0254			0.0607	0.0781	0.0781	0.0656	0.1017	0.1171	0.0948	0.114	0.1051	0.1399
8132	TAG47:1-FA16:0	Triacylglycerol	TAG Ester	54398	DMS-MS	100010546			0.2084	0.1998	0.2297	0.2442	0.3167	0.0538	0.0444	0.0643	0.0627	0.07	0.2525	0.3946	0.4124	0.3127	0.3427	0.5477	0.4463	0.6615	0.5061	0.6191
8133	TAG47:1-FA16:1	Triacylglycerol	TAG Ester	54577	DMS-MS	100010725			0.1146	0.105	0.1175	0.1186	0.1448	0.0472	0.037	0.0538	0.0739	0.0667	0.1271	0.1788	0.1844	0.1605	0.1666	0.2667	0.1784	0.2838	0.2174	0.2758
8134	TAG47:1-FA17:0	Triacylglycerol	TAG Ester	53872	DMS-MS	100010020			0.0184	0.0232		0.0218							0.0183	0.0251	0.019			0.0282	0.0288	0.0338	0.0239	0.0306
8136	TAG47:1-FA18:1	Triacylglycerol	TAG Ester	54578	DMS-MS	100010726			0.0916	0.1008	0.1084	0.1052	0.1135	0.0367	0.0297	0.0364	0.0464	0.0295	0.0878	0.1158	0.1317	0.1128	0.1155	0.1834	0.1379	0.2041	0.1634	0.1981
8140	TAG47:2-FA14:0	Triacylglycerol	TAG Ester	53541	DMS-MS	100009689			0.0562	0.0424	0.0419	0.0535	0.0584						0.0599	0.0909	0.077	0.071	0.0629	0.1007	0.0736	0.1342	0.1116	0.1112
8142	TAG47:2-FA15:0	Triacylglycerol	TAG Ester	54230	DMS-MS	100010378														0.0193							0.0204
8144	TAG47:2-FA16:1	Triacylglycerol	TAG Ester	54579	DMS-MS	100010727			0.0658	0.0595	0.0727	0.0699	0.0769	0.0296	0.0259	0.0354		0.0316	0.0883	0.1202	0.1125	0.088	0.0877	0.1274	0.1163	0.1663	0.1159	0.1876
8146	TAG47:2-FA18:1	Triacylglycerol	TAG Ester	53698	DMS-MS	100009846					0.0172		0.0279						0.025		0.0301	0.0237		0.0326		0.0298	0.0346	0.0323
8147	TAG47:2-FA18:2	Triacylglycerol	TAG Ester	54580	DMS-MS	100010728																						0.0205
8171	TAG48:0-FA14:0	Triacylglycerol	TAG Ester	54399	DMS-MS	100010547			0.121	0.1323	0.1786	0.1754	0.1894	0.0498	0.0392	0.0693	0.0462	0.0546	0.1377	0.1754	0.1789	0.1498	0.1509	0.3444	0.2843	0.3387	0.2833	0.3199
8173	TAG48:0-FA16:0	Triacylglycerol	TAG Ester	54581	DMS-MS	100010729			0.715	0.6638	0.7252	0.7464	0.9167	0.2408	0.2283	0.2797	0.2699	0.2179	0.5978	0.8312	0.7925	0.6968	0.7081	1.5485	1.2651	1.5476	1.2995	1.5645
8175	TAG48:0-FA18:0	Triacylglycerol	TAG Ester	54400	DMS-MS	100010548			0.1373	0.141	0.1915	0.1554	0.2021	0.0462	0.0363	0.048	0.0581	0.0572	0.1377	0.1811	0.1809	0.1503	0.1383	0.2978	0.2771	0.3057	0.2601	0.317
8178	TAG48:1-FA12:0	Triacylglycerol	TAG Ester	53542	DMS-MS	100009690			0.019	0.0175		0.0223							0.0398	0.0273	0.0206			0.0497	0.0514	0.0424	0.0408	0.0383
8180	TAG48:1-FA14:0	Triacylglycerol	TAG Ester	54040	DMS-MS	100010188			0.3389	0.3569	0.3946	0.3534	0.4493	0.1572	0.1316	0.1832	0.1595	0.1519	0.375	0.5373	0.508	0.4153	0.4527	0.8833	0.8071	0.9779	0.8054	1.0336
8181	TAG48:1-FA14:1	Triacylglycerol	TAG Ester	54231	DMS-MS	100010379																		0.0314	0.0235	0.0244	0.0226	0.0261
8183	TAG48:1-FA16:0	Triacylglycerol	TAG Ester	53359	DMS-MS	100009507			0.5551	0.5651	0.6425	0.6383	0.6997	0.2625	0.2243	0.2967	0.2736	0.2404	0.6001	0.8501	0.8097	0.7265	0.7467	1.5628	1.2919	1.5515	1.431	1.6009
8184	TAG48:1-FA16:1	Triacylglycerol	TAG Ester	53543	DMS-MS	100009691			0.1857	0.1921	0.2197	0.2242	0.2403	0.085	0.0689	0.0931	0.1179	0.1078	0.1711	0.2471	0.2848	0.2178	0.2429	0.4737	0.3581	0.4986	0.4362	0.4982
8186	TAG48:1-FA18:0	Triacylglycerol	TAG Ester	53699	DMS-MS	100009847			0.0413	0.0469	0.0432	0.0389	0.0483		0.0169				0.0468	0.0623	0.0598	0.0529	0.073	0.1262	0.1215	0.1063	0.0924	0.1185
8187	TAG48:1-FA18:1	Triacylglycerol	TAG Ester	54401	DMS-MS	100010549			0.3718	0.3279	0.3979	0.3803	0.4472	0.1568	0.1118	0.1726	0.1852	0.14	0.349	0.5306	0.4922	0.3856	0.4629	0.9349	0.7848	0.9942	0.826	1.0522
8192	TAG48:2-FA12:0	Triacylglycerol	TAG Ester	54582	DMS-MS	100010730				0.0157	0.0198	0.0226							0.0356	0.0261	0.0361	0.0286		0.0541	0.0477	0.0459	0.042	0.0382
8194	TAG48:2-FA14:0	Triacylglycerol	TAG Ester	54583	DMS-MS	100010731			0.0976	0.092	0.1105	0.1055	0.1321	0.0378	0.0436	0.0434	0.0444	0.0462	0.102	0.1471	0.1352	0.107	0.1242	0.2555	0.2241	0.2444	0.2134	0.2523
8195	TAG48:2-FA14:1	Triacylglycerol	TAG Ester	53700	DMS-MS	100009848			0.0276	0.0399	0.0323	0.0355	0.0448						0.029	0.0357	0.0445	0.0343	0.0416	0.0794	0.0581	0.0523	0.0485	0.0558
8197	TAG48:2-FA16:0	Triacylglycerol	TAG Ester	53360	DMS-MS	100009508			0.064	0.0658	0.0681	0.0844	0.0897	0.0472	0.0305	0.0309	0.0433	0.0438	0.0723	0.0852	0.0877	0.0788	0.0794	0.1871	0.117	0.1719	0.1362	0.1836
8198	TAG48:2-FA16:1	Triacylglycerol	TAG Ester	54402	DMS-MS	100010550			0.1942	0.1725	0.1956	0.198	0.2207	0.0836	0.0726	0.1091	0.096	0.0964	0.1921	0.2478	0.2679	0.1989	0.246	0.4811	0.3842	0.4866	0.3985	0.5411
8201	TAG48:2-FA18:1	Triacylglycerol	TAG Ester	54584	DMS-MS	100010732			0.1323	0.1235	0.1192	0.1303	0.1576	0.0452	0.0463	0.0601	0.0538	0.0641	0.1221	0.1592	0.1789	0.1274	0.1407	0.3177	0.2797	0.3357	0.2652	0.3474
8202	TAG48:2-FA18:2	Triacylglycerol	TAG Ester	54041	DMS-MS	100010189			0.0175		0.0254									0.0273	0.0321	0.0274		0.0435	0.0356	0.0397	0.0346	0.0352
8210	TAG48:3-FA14:1	Triacylglycerol	TAG Ester	53883	DMS-MS	100010031						0.0163							0.0226	0.0126					0.0369	0.0279	0.0254	0.027
8213	TAG48:3-FA16:1	Triacylglycerol	TAG Ester	54408	DMS-MS	100010556			0.0232	0.0226	0.0361	0.0283	0.0345						0.0328	0.0323	0.034	0.0395		0.0575	0.0433	0.0582	0.0464	0.0501
8215	TAG48:3-FA18:1	Triacylglycerol	TAG Ester	54585	DMS-MS	100010733														0.0147						0.0298	0.019
8216	TAG48:3-FA18:2	Triacylglycerol	TAG Ester	54232	DMS-MS	100010380																					0.0177
8223	TAG48:4-FA14:1	Triacylglycerol	TAG Ester	54403	DMS-MS	100010551																0.0389	0.0692		0.0516
8261	TAG49:0-FA15:0	Triacylglycerol	TAG Ester	53704	DMS-MS	100009852			0.0541	0.0647	0.0752	0.0633	0.0743	0.0325	0.0205	0.0362		0.0414	0.0499	0.0603	0.0657	0.0622	0.0652	0.1138	0.0771	0.1252	0.1076	0.1035
8262	TAG49:0-FA16:0	Triacylglycerol	TAG Ester	54044	DMS-MS	100010192			0.7847	0.6785	0.8257	0.7963	0.886	0.2002	0.1587	0.2327	0.2207	0.1644	0.8233	1.1753	1.1939	1.0022	1.1215	1.6106	1.2344	1.8297	1.4502	1.8395
8263	TAG49:0-FA17:0	Triacylglycerol	TAG Ester	54405	DMS-MS	100010553			0.1125	0.1277	0.1375	0.1274	0.1597	0.0422	0.0407	0.0519	0.0658	0.0606	0.1235	0.1845	0.1679	0.1575	0.1988	0.2592	0.1902	0.2628	0.2304	0.2568
8264	TAG49:0-FA18:0	Triacylglycerol	TAG Ester	53363	DMS-MS	100009511			0.1981	0.1827	0.2289	0.2027	0.2409	0.0543	0.0494	0.078	0.0764	0.0487	0.1258	0.1801	0.1754	0.1551	0.1588	0.2847	0.2294	0.2945	0.2279	0.3142
8269	TAG49:1-FA14:0	Triacylglycerol	TAG Ester	54233	DMS-MS	100010381			0.2678	0.2572	0.2916	0.3053	0.3358	0.0628	0.0443	0.081	0.0559	0.0779	0.2785	0.4208	0.4361	0.3637	0.3702	0.5135	0.428	0.6169	0.5163	0.6644
8271	TAG49:1-FA15:0	Triacylglycerol	TAG Ester	53364	DMS-MS	100009512			0.1716	0.1613	0.162	0.1707	0.2228	0.0699	0.0737	0.0834	0.0748	0.0892	0.1596	0.2586	0.226	0.2028	0.1855	0.3375	0.3006	0.3661	0.3188	0.3809
8272	TAG49:1-FA16:0	Triacylglycerol	TAG Ester	53876	DMS-MS	100010024			1.423	1.3	1.43	1.463	1.7099	0.4197	0.3478	0.5046	0.4294	0.4233	1.6694	2.4781	2.3558	2.0442	1.9224	3.5818	2.8721	3.8965	3.2087	4.0223
8273	TAG49:1-FA16:1	Triacylglycerol	TAG Ester	53545	DMS-MS	100009693			0.1705	0.1704	0.167	0.1933	0.2159	0.0656	0.0583	0.081	0.0748	0.0487	0.1944	0.2942	0.2817	0.2592	0.2358	0.3512	0.2869	0.4047	0.3355	0.4084
8274	TAG49:1-FA17:0	Triacylglycerol	TAG Ester	54045	DMS-MS	100010193			0.1019	0.1064	0.1088	0.1114	0.1172	0.0444	0.0358	0.048	0.0652	0.0626	0.1258	0.14	0.1617	0.1269	0.2004	0.2002	0.1856	0.2238	0.1833	0.2139
8276	TAG49:1-FA18:1	Triacylglycerol	TAG Ester	53365	DMS-MS	100009513			0.6312	0.5977	0.6525	0.6649	0.7841	0.2025	0.1546	0.2196	0.2283	0.1763	0.488	0.7703	0.7674	0.706	0.7011	1.1239	0.956	1.3281	1.0926	1.3045
8283	TAG49:2-FA14:0	Triacylglycerol	TAG Ester	54046	DMS-MS	100010194			0.2572	0.1911	0.2683	0.2486	0.2944	0.086	0.0608	0.0713	0.0706	0.0799	0.2964	0.436	0.4059	0.3506	0.3545	0.5408	0.4404	0.6178	0.5547	0.6899
8285	TAG49:2-FA15:0	Triacylglycerol	TAG Ester	53877	DMS-MS	100010025			0.0471	0.0457	0.0568	0.0491	0.0722	0.0306		0.0345			0.051	0.0731	0.0712	0.0568	0.0736	0.087	0.085	0.0965	0.0848	0.1157
8286	TAG49:2-FA16:0	Triacylglycerol	TAG Ester	54234	DMS-MS	100010382			0.2654	0.2327	0.2442	0.2562	0.2658	0.0699	0.0524	0.0858	0.093	0.0809	0.3385	0.4467	0.4592	0.4279	0.4331	0.6832	0.5143	0.6765	0.592	0.6984
8287	TAG49:2-FA16:1	Triacylglycerol	TAG Ester	53546	DMS-MS	100009694			0.3354	0.3342	0.3896	0.373	0.4053	0.1506	0.1151	0.1958	0.1981	0.1631	0.4153	0.6083	0.6012	0.4945	0.5219	0.7752	0.6535	0.8162	0.7517	0.9293
8288	TAG49:2-FA17:0	Triacylglycerol	TAG Ester	53366	DMS-MS	100009514			0.0142		0.0144									0.0227	0.0163			0.0274			0.0226	0.0243
8290	TAG49:2-FA18:1	Triacylglycerol	TAG Ester	54406	DMS-MS	100010554			0.3248	0.3009	0.3173	0.3548	0.3889	0.101	0.0894	0.1343	0.0998	0.1228	0.2959	0.4804	0.4544	0.4143	0.4166	0.6428	0.5143	0.7121	0.6307	0.6996
8291	TAG49:2-FA18:2	Triacylglycerol	TAG Ester	54047	DMS-MS	100010195			0.0295	0.0313	0.0213	0.031	0.0395						0.0382	0.0444	0.0438	0.042		0.0572	0.0465	0.0514	0.0406	0.0578
8299	TAG49:3-FA16:0	Triacylglycerol	TAG Ester	53367	DMS-MS	100009515				0.0159										0.0215	0.0239			0.0315		0.0314	0.0237	0.0297
8300	TAG49:3-FA16:1	Triacylglycerol	TAG Ester	53368	DMS-MS	100009516			0.0502	0.0578	0.0573	0.0542	0.0759			0.031			0.0631	0.0869	0.0922	0.0783	0.1191	0.1287	0.0895	0.1325	0.1293	0.1326
8303	TAG49:3-FA18:2	Triacylglycerol	TAG Ester	53705	DMS-MS	100009853			0.0212	0.0202		0.0238							0.0237	0.0283	0.0217			0.0348	0.0427	0.0388	0.0259	0.0285
8335	TAG50:0-FA14:0	Triacylglycerol	TAG Ester	53706	DMS-MS	100009854			0.0626	0.0542	0.0552	0.0659	0.086	0.0283	0.0195	0.0307			0.0681	0.0956	0.1066	0.0914	0.1092	0.1622	0.1268	0.1771	0.1565	0.152
8337	TAG50:0-FA16:0	Triacylglycerol	TAG Ester	54235	DMS-MS	100010383			0.8827	0.7961	0.9678	0.9175	1.0372	0.3196	0.3463	0.3941	0.4097	0.3177	0.7478	1.0399	1.026	0.8801	0.9329	1.9731	1.5736	1.6629	1.6346	1.8626
8339	TAG50:0-FA18:0	Triacylglycerol	TAG Ester	53878	DMS-MS	100010026			0.5756	0.5196	0.6911	0.6183	0.6695	0.1922	0.1928	0.2773	0.1958	0.2107	0.4519	0.6245	0.6618	0.5923	0.5227	1.1015	0.9959	1.1091	0.9488	1.1383
8345	TAG50:1-FA14:0	Triacylglycerol	TAG Ester	54048	DMS-MS	100010196			0.2533	0.2149	0.2571	0.2631	0.2706	0.1067	0.0803	0.1037	0.1202	0.1037	0.2913	0.4164	0.4213	0.3569	0.2884	0.7714	0.6496	0.7588	0.663	0.7485
8348	TAG50:1-FA16:0	Triacylglycerol	TAG Ester	53879	DMS-MS	100010027			2.0963	1.9123	2.2964	2.2091	2.443	0.9386	0.867	1.1775	1.1422	1.0481	1.9882	2.8757	2.7303	2.5757	2.46	5.4523	4.3241	5.5354	4.6013	5.6301
8349	TAG50:1-FA16:1	Triacylglycerol	TAG Ester	54236	DMS-MS	100010384			0.224	0.1897	0.2097	0.2366	0.2642	0.084	0.0799	0.1125	0.1278	0.1004	0.2255	0.3205	0.2934	0.2563	0.257	0.562	0.4927	0.523	0.4525	0.5706
8351	TAG50:1-FA18:0	Triacylglycerol	TAG Ester	54237	DMS-MS	100010385			0.4263	0.3727	0.4299	0.4564	0.4637	0.1596	0.1543	0.1857	0.1988	0.1651	0.4039	0.5777	0.5964	0.4955	0.5085	1.1357	0.9678	1.1146	0.9148	1.1092
8352	TAG50:1-FA18:1	Triacylglycerol	TAG Ester	53880	DMS-MS	100010028			1.279	1.1288	1.4491	1.3531	1.417	0.5548	0.5013	0.6913	0.6093	0.5699	1.2189	1.7833	1.7036	1.5341	1.4414	3.3089	2.7172	3.2534	2.8193	3.4137
8355	TAG50:1-FA20:1	Triacylglycerol	TAG Ester	53548	DMS-MS	100009696			0.022	0.0292	0.0315	0.0295		0.0315					0.0668	0.0805	0.0939	0.0861	0.0707	0.1691	0.1353	0.1488	0.1348	0.1751
8359	TAG50:2-FA14:0	Triacylglycerol	TAG Ester	53549	DMS-MS	100009697			0.3071	0.3114	0.2957	0.3508	0.3422	0.1714	0.1393	0.1983	0.1648	0.1862	0.365	0.5154	0.4836	0.4731	0.4425	0.92	0.7482	0.9226	0.8198	0.9584
8360	TAG50:2-FA14:1	Triacylglycerol	TAG Ester	53369	DMS-MS	100009517			0.0246	0.021	0.0227	0.0296	0.0233						0.0284	0.031	0.0283	0.0259		0.0622	0.0438	0.0467	0.0343	0.0498
8362	TAG50:2-FA16:0	Triacylglycerol	TAG Ester	54586	DMS-MS	100010734			0.5809	0.5473	0.6097	0.6522	0.6568	0.2753	0.2481	0.3544	0.3356	0.2932	0.569	0.882	0.874	0.7522	0.7671	1.6287	1.1456	1.7041	1.2854	1.6038
8363	TAG50:2-FA16:1	Triacylglycerol	TAG Ester	53881	DMS-MS	100010029			0.6344	0.5942	0.7115	0.6704	0.6939	0.3357	0.2891	0.4028	0.3742	0.3474	0.6513	0.9191	0.9108	0.7712	0.8276	1.7486	1.3769	1.7744	1.5433	1.8156
8365	TAG50:2-FA18:0	Triacylglycerol	TAG Ester	54049	DMS-MS	100010197			0.0488	0.0455	0.0444	0.054	0.0466				0.0336	0.0291	0.0427	0.0734	0.0705	0.0554	0.0747	0.0949	0.0934	0.1093	0.0888	0.1197
8366	TAG50:2-FA18:1	Triacylglycerol	TAG Ester	53550	DMS-MS	100009698			1.1888	1.0592	1.2141	1.296	1.3242	0.5746	0.5061	0.7039	0.6448	0.6089	1.1946	1.7546	1.6926	1.488	1.5522	3.2107	2.759	3.1184	2.6443	3.368
8367	TAG50:2-FA18:2	Triacylglycerol	TAG Ester	53882	DMS-MS	100010030			0.0499	0.0497	0.0591	0.0604	0.0707		0.022	0.0371		0.0352	0.0613	0.0744	0.0688	0.0734	0.0802	0.138	0.0948	0.1273	0.1188	0.1488
8371	TAG50:2-FA20:2	Triacylglycerol	TAG Ester	54238	DMS-MS	100010386						0.0141							0.0269	0.0283	0.0283	0.0281		0.0559	0.0392	0.0523	0.0482	0.0627
8374	TAG50:3-FA14:0	Triacylglycerol	TAG Ester	53707	DMS-MS	100009855			0.0246	0.0247	0.0303	0.0302	0.0311						0.039	0.0518	0.0643	0.0506	0.0472	0.0857	0.0688	0.0682	0.0572	0.0821
8375	TAG50:3-FA14:1	Triacylglycerol	TAG Ester	54587	DMS-MS	100010735			0.0269	0.0311	0.0388	0.0271	0.0369			0.0254			0.0317	0.0303	0.0351	0.0492		0.0597	0.0578	0.0632	0.0554	0.0611
8377	TAG50:3-FA16:0	Triacylglycerol	TAG Ester	54050	DMS-MS	100010198			0.0317	0.0376	0.0302	0.0382	0.0336						0.0526	0.0572	0.0581	0.053	0.0652	0.087	0.0669	0.0776	0.0717	0.0752
8378	TAG50:3-FA16:1	Triacylglycerol	TAG Ester	53885	DMS-MS	100010033			0.2063	0.1631	0.2027	0.1987	0.2053	0.0845	0.0722	0.0936	0.0862	0.0944	0.1775	0.2444	0.2728	0.2592	0.2036	0.4426	0.3503	0.5033	0.4043	0.5047
8381	TAG50:3-FA18:1	Triacylglycerol	TAG Ester	54409	DMS-MS	100010557			0.1472	0.1449	0.1774	0.1623	0.1576	0.0666	0.0465	0.0882	0.0724	0.0772	0.1143	0.1804	0.1826	0.1707	0.1643	0.3425	0.2862	0.3395	0.2699	0.3368
8382	TAG50:3-FA18:2	Triacylglycerol	TAG Ester	53886	DMS-MS	100010034			0.0534	0.0455	0.0623	0.055	0.0504		0.0228	0.0309			0.0581	0.0926	0.0743	0.0855	0.0676	0.1119	0.1032	0.1222	0.0931	0.131
8387	TAG50:3-FA20:3	Triacylglycerol	TAG Ester	54588	DMS-MS	100010736															0.0279	0.0376				0.0359	0.033	0.04
8394	TAG50:4-FA16:1	Triacylglycerol	TAG Ester	54052	DMS-MS	100010200														0.0219						0.0246	0.0186	0.0238
8396	TAG50:4-FA18:1	Triacylglycerol	TAG Ester	53888	DMS-MS	100010036																				0.0188
8406	TAG50:5-FA14:1	Triacylglycerol	TAG Ester	53889	DMS-MS	100010037				0.0239	0.026			0.0226			0.0564		0.032	0.021	0.0219	0.0231	0.0873		0.0726	0.0409	0.0312	0.0216
8453	TAG51:0-FA16:0	Triacylglycerol	TAG Ester	54242	DMS-MS	100010390			0.3644	0.3499	0.4058	0.3698	0.4069	0.1379	0.1019	0.1498	0.1005	0.1189	0.3778	0.5871	0.5861	0.5222	0.4747	0.769	0.6254	0.8424	0.7478	0.9115
8454	TAG51:0-FA17:0	Triacylglycerol	TAG Ester	53709	DMS-MS	100009857			0.1051	0.0885	0.1013	0.1168	0.1151	0.0378	0.0355	0.0403	0.0498	0.0505	0.0892	0.1205	0.1163	0.1148	0.1203	0.2027	0.1549	0.1822	0.1587	0.1892
8455	TAG51:0-FA18:0	Triacylglycerol	TAG Ester	53554	DMS-MS	100009702			0.2604	0.2425	0.3165	0.3224	0.3464	0.0935	0.0883	0.1042	0.0998	0.1156	0.1496	0.2804	0.2624	0.2621	0.191	0.3773	0.3274	0.3691	0.3482	0.404
8464	TAG51:1-FA15:0	Triacylglycerol	TAG Ester	53373	DMS-MS	100009521			0.1005	0.098	0.1063	0.1066	0.1337	0.0403	0.0366	0.0652	0.0484	0.0521	0.0703	0.0896	0.0874	0.0909	0.0707	0.1299	0.1252	0.1595	0.1232	0.1561
8465	TAG51:1-FA16:0	Triacylglycerol	TAG Ester	53710	DMS-MS	100009858			1.1442	1.0029	1.2124	1.161	1.2785	0.4103	0.3573	0.4755	0.3455	0.3632	1.2925	1.995	1.9753	1.803	1.6246	2.5244	2.1395	2.7308	2.6327	3.1424
8467	TAG51:1-FA17:0	Triacylglycerol	TAG Ester	54412	DMS-MS	100010560			0.2569	0.2614	0.2762	0.2919	0.2822	0.1473	0.1048	0.1168	0.217	0.1803	0.2795	0.3744	0.4324	0.3691	0.4228	0.529	0.4679	0.5646	0.4971	0.5669
8468	TAG51:1-FA18:0	Triacylglycerol	TAG Ester	54591	DMS-MS	100010739			0.4493	0.4664	0.5221	0.5168	0.5374	0.1681	0.1469	0.191	0.1837	0.1869	0.3101	0.4828	0.4912	0.4406	0.4016	0.6801	0.56	0.7425	0.6851	0.8334
8469	TAG51:1-FA18:1	Triacylglycerol	TAG Ester	53891	DMS-MS	100010039			0.8948	0.7856	0.8785	1.0329	0.9772	0.3097	0.3023	0.3529	0.3001	0.3078	0.7583	1.1197	1.0976	1.1038	0.9848	1.482	1.1815	1.6042	1.443	1.7513
8478	TAG51:2-FA15:0	Triacylglycerol	TAG Ester	54243	DMS-MS	100010391			0.1206	0.1148	0.1499	0.1463	0.1427	0.0611	0.0583	0.0659	0.051	0.064	0.0956	0.1337	0.1259	0.1196	0.1155	0.1784	0.1529	0.2083	0.1717	0.2087
8479	TAG51:2-FA16:0	Triacylglycerol	TAG Ester	53374	DMS-MS	100009522			1.2935	1.238	1.3723	1.4459	1.4064	0.5623	0.5024	0.7267	0.5866	0.6716	1.647	2.2973	2.2082	2.1702	1.7983	3.2524	2.5832	3.4249	3.0874	3.7089
8480	TAG51:2-FA16:1	Triacylglycerol	TAG Ester	53375	DMS-MS	100009523			0.2041	0.1809	0.228	0.2009	0.217	0.0751	0.0748	0.0965	0.0836	0.0806	0.2319	0.3895	0.3673	0.3671	0.2845	0.4519	0.3784	0.5084	0.4452	0.5354
8481	TAG51:2-FA17:0	Triacylglycerol	TAG Ester	54056	DMS-MS	100010204			0.0708	0.0612	0.0598	0.06	0.0674	0.0344	0.0319	0.0279	0.0435	0.0487	0.08	0.1023	0.097	0.1021	0.0894	0.1237	0.13	0.15	0.1116	0.1431
8482	TAG51:2-FA18:0	Triacylglycerol	TAG Ester	54592	DMS-MS	100010740			0.1511	0.1491	0.1736	0.1627	0.1809	0.1256	0.1184	0.127	0.1157	0.1136	0.1679	0.2215	0.1771	0.176	0.1776	0.2138	0.2032	0.1968	0.2058	0.2329
8483	TAG51:2-FA18:1	Triacylglycerol	TAG Ester	53555	DMS-MS	100009703			1.7457	1.6992	1.8736	1.9569	1.9762	0.78	0.6611	0.8541	0.7726	0.7582	1.5674	2.298	2.2058	2.2475	1.7487	3.3002	2.859	3.5334	3.2229	3.7991
8484	TAG51:2-FA18:2	Triacylglycerol	TAG Ester	54413	DMS-MS	100010561			0.0456	0.0416	0.0486	0.0473	0.0525		0.0187	0.0228			0.0424	0.0694	0.0736	0.0609	0.062	0.0852	0.0605	0.0609	0.0638	0.0813
8492	TAG51:3-FA15:0	Triacylglycerol	TAG Ester	54593	DMS-MS	100010741			0.0225	0.0235	0.0202	0.025	0.0318							0.0219	0.0264	0.031				0.0271	0.0229	0.0412
8493	TAG51:3-FA16:0	Triacylglycerol	TAG Ester	53711	DMS-MS	100009859			6.3384	6.4697	6.3955	6.445	7.484	6.3361	6.3506	6.3043	6.2818	6.1544	6.5587	6.488	6.6721	6.8086	7.2213	6.5769	6.4819	6.3212	6.5251	6.7126
8494	TAG51:3-FA16:1	Triacylglycerol	TAG Ester	53376	DMS-MS	100009524			0.1695	0.1533	0.1865	0.1976	0.2345	0.0765	0.0693	0.0801	0.0726	0.0819	0.284	0.3952	0.4066	0.4221	0.2641	0.5122	0.4195	0.5697	0.5061	0.5673
8497	TAG51:3-FA18:1	Triacylglycerol	TAG Ester	53378	DMS-MS	100009526			4.1657	4.1829	4.1655	4.3498	5.0012	4.1388	4.2259	4.0768	3.952	4.1085	4.3016	4.3832	4.5113	4.5927	5.2053	4.5087	4.6182	4.3093	4.6068	4.5981
8498	TAG51:3-FA18:2	Triacylglycerol	TAG Ester	54244	DMS-MS	100010392			0.0785	0.0773	0.0606	0.0782	0.0859	0.0311	0.022	0.0382	0.0336	0.0405	0.0842	0.1141	0.1145	0.1152	0.0904	0.1194	0.115	0.153	0.1489	0.1427
8505	TAG51:4-FA15:0	Triacylglycerol	TAG Ester	53556	DMS-MS	100009704			0.015																		0.0172	0.0182
8506	TAG51:4-FA16:0	Triacylglycerol	TAG Ester	54414	DMS-MS	100010562			0.7656	0.7803	0.7526	0.7865	0.8361	0.7318	0.763	0.7664	0.7423	0.6934	0.8127	0.778	0.757	0.8164	0.9007	0.7621	0.8633	0.7266	0.7742	0.742
8507	TAG51:4-FA16:1	Triacylglycerol	TAG Ester	54245	DMS-MS	100010393			0.0212	0.0203	0.0271	0.0235	0.0343						0.0269	0.0518	0.0361	0.044		0.0453	0.0376	0.0532	0.0438	0.0566
8509	TAG51:4-FA18:1	Triacylglycerol	TAG Ester	54415	DMS-MS	100010563			0.5219	0.5287	0.5213	0.5124	0.5157	0.5231	0.4819	0.5298	0.5216	0.4788	0.5205	0.5026	0.5531	0.5519	0.6311	0.5296	0.5718	0.5054	0.5441	0.5746
8510	TAG51:4-FA18:2	Triacylglycerol	TAG Ester	53557	DMS-MS	100009705			0.0212			0.0196							0.0343	0.0303	0.0233	0.0373		0.0373		0.0272	0.0294	0.0345
8513	TAG51:4-FA20:4	Triacylglycerol	TAG Ester	53713	DMS-MS	100009861			0.0269	0.0175	0.0302	0.0257	0.0304						0.0259	0.0441	0.0485	0.0564		0.0547	0.0508	0.0519	0.0507	0.0582
8546	TAG52:0-FA16:0	Triacylglycerol	TAG Ester	53714	DMS-MS	100009862			0.3619	0.2929	0.4037	0.3334	0.3873	0.1398	0.1605	0.2259	0.1958	0.1777	0.3787	0.539	0.6136	0.5256	0.437	0.8498	0.7633	0.7957	0.7492	0.9001
8548	TAG52:0-FA18:0	Triacylglycerol	TAG Ester	53892	DMS-MS	100010040			0.6729	0.5585	0.8332	0.6846	0.6987	0.2672	0.2913	0.3611	0.3024	0.2813	0.5342	0.6757	0.7815	0.6686	0.5965	1.2047	1.0188	1.0966	0.9803	1.1848
8550	TAG52:0-FA20:0	Triacylglycerol	TAG Ester	54059	DMS-MS	100010207			0.0421	0.0441	0.0511	0.0477	0.043	0.0217	0.02		0.0413		0.1157	0.1572	0.1331	0.1551	0.1291	0.2443	0.1915	0.2195	0.1808	0.2349
8557	TAG52:1-FA16:0	Triacylglycerol	TAG Ester	54417	DMS-MS	100010565			1.2698	1.1841	1.4288	1.4157	1.3353	0.6398	0.5592	0.779	0.7098	0.6023	1.4101	2.0277	2.0101	1.8152	1.4281	3.8094	2.9243	3.3936	3.3392	3.9693
8558	TAG52:1-FA16:1	Triacylglycerol	TAG Ester	53379	DMS-MS	100009527			0.0665	0.0696	0.0797	0.0779	0.0653	0.0442	0.0282	0.0469		0.0452	0.1066	0.1424	0.1431	0.1376	0.1147	0.2853	0.1993	0.2049	0.2065	0.2451
8560	TAG52:1-FA18:0	Triacylglycerol	TAG Ester	53715	DMS-MS	100009863			1.3597	1.2758	1.445	1.542	1.4308	0.6402	0.5526	0.7868	0.6879	0.6129	1.4028	1.9364	1.8742	1.718	1.3141	3.6484	2.757	3.2654	3.158	3.7534
8561	TAG52:1-FA18:1	Triacylglycerol	TAG Ester	53558	DMS-MS	100009706			1.291	1.2023	1.4184	1.3921	1.3231	0.6157	0.5911	0.7955	0.6675	0.603	1.3072	1.929	1.9258	1.7967	1.3306	3.4594	2.6381	3.3413	3.129	3.6952
8563	TAG52:1-FA20:0	Triacylglycerol	TAG Ester	53893	DMS-MS	100010041			0.0318	0.0266	0.0324	0.0371	0.0374	0.0313		0.0377		0.0281	0.1116	0.1677	0.161	0.1537	0.1147	0.2101	0.1843	0.2058	0.1931	0.2244
8564	TAG52:1-FA20:1	Triacylglycerol	TAG Ester	53559	DMS-MS	100009707			0.0927	0.0682	0.1034	0.0833	0.0804	0.0623	0.0641	0.0727	0.078	0.0688	0.1733	0.2841	0.2896	0.2319	0.1878	0.5452	0.413	0.5076	0.4471	0.5225
8571	TAG52:2-FA14:0	Triacylglycerol	TAG Ester	53716	DMS-MS	100009864			0.0393	0.0328	0.0516	0.0456	0.043	0.0311	0.0324	0.0398	0.0312		0.1139	0.1565	0.1476	0.1264	0.114	0.2331	0.2098	0.2534	0.234	0.2879
8574	TAG52:2-FA16:0	Triacylglycerol	TAG Ester	53717	DMS-MS	100009865			1.6526	1.4602	1.7706	1.7931	1.5852	1.0925	0.9235	1.257	1.1581	1.0355	1.7851	2.5451	2.6715	2.2927	1.8423	4.7368	3.9797	4.7354	4.1869	4.9172
8575	TAG52:2-FA16:1	Triacylglycerol	TAG Ester	53560	DMS-MS	100009708			0.3566	0.3303	0.3464	0.3821	0.3698	0.2049	0.1854	0.2453	0.1928	0.2027	0.4194	0.6612	0.5816	0.5665	0.4103	1.1854	0.9162	1.0726	0.964	1.1088
8577	TAG52:2-FA18:0	Triacylglycerol	TAG Ester	53380	DMS-MS	100009528			0.3559	0.2754	0.3746	0.3701	0.3793	0.1804	0.1433	0.2196	0.1807	0.1915	0.3874	0.5316	0.5435	0.4984	0.356	0.9635	0.76	0.881	0.7956	0.947
8578	TAG52:2-FA18:1	Triacylglycerol	TAG Ester	53894	DMS-MS	100010042			3.6413	3.4429	3.989	4.1369	3.7619	2.314	1.9484	2.7694	2.4296	2.3009	3.8822	5.6615	5.4851	5.0153	3.9195	10.4888	8.3718	10.2867	8.7756	10.6217
8579	TAG52:2-FA18:2	Triacylglycerol	TAG Ester	53895	DMS-MS	100010043			0.0538	0.0637	0.0743	0.0695	0.07	0.0283	0.0315	0.0334		0.0396	0.0604	0.099	0.0977	0.0768	0.0888	0.138	0.1235	0.1616	0.1225	0.1427
8581	TAG52:2-FA20:0	Triacylglycerol	TAG Ester	54060	DMS-MS	100010208														0.0195	0.0224			0.0365			0.0217	0.021
8582	TAG52:2-FA20:1	Triacylglycerol	TAG Ester	53718	DMS-MS	100009866			0.0775	0.0728	0.0843	0.0844	0.0828	0.094	0.059	0.0931	0.1043	0.0675	0.1797	0.3171	0.2903	0.2548	0.2154	0.4998	0.4437	0.5453	0.4221	0.4828
8583	TAG52:2-FA20:2	Triacylglycerol	TAG Ester	54418	DMS-MS	100010566			0.029	0.0307	0.0407	0.0348	0.0452	0.0258				0.0311	0.0631	0.0808	0.0832	0.0754	0.0747	0.1417	0.1019	0.1458	0.1225	0.1448
8586	TAG52:3-FA14:0	Triacylglycerol	TAG Ester	54061	DMS-MS	100010209			0.0208	0.0228	0.0271	0.0227	0.0232						0.0351	0.0609	0.0533	0.0506		0.1019	0.0722	0.0845	0.0793	0.0853
8589	TAG52:3-FA16:0	Triacylglycerol	TAG Ester	53381	DMS-MS	100009529			0.1497	0.1393	0.1383	0.1641	0.1851	0.0812	0.0612	0.0761	0.1217	0.0634	0.2081	0.2922	0.2913	0.2704	0.2083	0.4581	0.3509	0.4184	0.3626	0.4173
8590	TAG52:3-FA16:1	Triacylglycerol	TAG Ester	53896	DMS-MS	100010044			0.495	0.4332	0.5877	0.539	0.6196	0.3102	0.2741	0.4154	0.3296	0.3348	0.6129	0.8484	0.8093	0.7498	0.6083	1.5336	1.2665	1.5283	1.2897	1.459
8592	TAG52:3-FA18:0	Triacylglycerol	TAG Ester	54246	DMS-MS	100010394			0.0271	0.0235	0.0353	0.0273	0.0345						0.032	0.0521	0.0554	0.0463	0.0482	0.0634	0.0475	0.0583	0.0558	0.0797
8593	TAG52:3-FA18:1	Triacylglycerol	TAG Ester	54594	DMS-MS	100010742			0.9181	0.9392	1.0791	1.1446	1.1793	0.5982	0.5259	0.7737	0.6773	0.6472	1.1164	1.5671	1.6286	1.4948	1.0304	2.7613	2.1879	2.871	2.3856	2.7368
8594	TAG52:3-FA18:2	Triacylglycerol	TAG Ester	54247	DMS-MS	100010395			0.139	0.1407	0.1645	0.1649	0.1676	0.1006	0.0696	0.1033	0.1376	0.0911	0.1756	0.2599	0.2655	0.2349	0.1823	0.3618	0.3901	0.4073	0.3442	0.4011
8597	TAG52:3-FA20:1	Triacylglycerol	TAG Ester	53562	DMS-MS	100009710													0.0391	0.0389	0.0378	0.0377		0.0563	0.0516	0.0489	0.0336	0.0493
8598	TAG52:3-FA20:2	Triacylglycerol	TAG Ester	54248	DMS-MS	100010396			0.0287	0.0295	0.0362	0.0346	0.0413		0.022	0.0252		0.0449	0.0549	0.1007	0.098	0.0749	0.0699	0.1479	0.1333	0.1565	0.1235	0.1613
[truncated: 225 more rows]

## Sheet: ScaledImpData (cells CLP)
								SAMPLE_NAME	UNDA-00048-01	UNDA-00049-01	UNDA-00050-01	UNDA-00051-01	UNDA-00052-01	UNDA-00053-01	UNDA-00054-01	UNDA-00055-01	UNDA-00056-01	UNDA-00057-01	UNDA-00058-01	UNDA-00059-01	UNDA-00060-01	UNDA-00061-01	UNDA-00062-01	UNDA-00063-01	UNDA-00064-01	UNDA-00065-01	UNDA-00066-01	UNDA-00067-01
[truncated: 862 more rows]

[truncated: 14 more sheets: ProNormImpData (cells CLP), Pathway Heat Map HD4, Pathway Heat Map CLP, Explanation (2), OrigScale (tissue HD4), ScaledImpData (tissue HD4), OrigScale (tissue CLP), ScaledImpData (tissue CLP), Pathway Heat Map HD4 (tissue), Pathway Heat Map CLP (tissue), Box Plots HD4 (pathway) (tissue, Box Plots HD4 (biochem) (tissue, Box Plots CLP (pathway) (tissue, Box Plots CLP (tissue)]
